# Supplementary material for: Bioinformatic Analysis Revealed the Essential Regulatory Genes and Pathways of Early and Advanced Atherosclerotic Plaque in Humans
Source: MDPI journal article supplement (doi:10.3390/cells11243976), 2022-12-08
Supplement: s1 [file s1]

# **Bioinformatic Analysis Revealed the Essential Regulatory Genes and Pathways of Early and Advanced Atherosclerotic Plaque in Humans**

**Luling He <sup>1,2</sup>, Andrea Palos-Jasso <sup>3</sup>, Yao Yi <sup>4</sup>, Manman Qin <sup>1,2</sup>, Liang Qiu <sup>1,2</sup>, Xiaofeng Yang <sup>3</sup>, Yifeng Zhang <sup>1,2,\*</sup> and Jun Yu <sup>3</sup>**

<sup>1</sup> Key Laboratory for Pharmacology and Translational Research of Traditional Chinese Medicine of Nan-chang, Centre for Translational Medicine, Jiangxi University of Chinese Medicine, Nanchang 330006, China

<sup>2</sup> Jiangxi Key Laboratory of Traditional Chinese Medicine for Prevention and Treatment of Vascular Re-modeling Diseases, Nanchang 330006, China

<sup>3</sup> Department of Cardiovascular Sciences and Centre for Metabolic Disease Research, Lewis Katz School of Medicine, Temple University, Philadelphia, PA 19140, USA

<sup>4</sup> Institute of Gynecology and Obstetrics of traditional Chinese Medicine, Jiangxi University of Chinese Medicine, Nanchang 330006, China

\* Correspondence: [zyf489662913@163.com](mailto:zyf489662913@163.com)

## Supplementally Figures

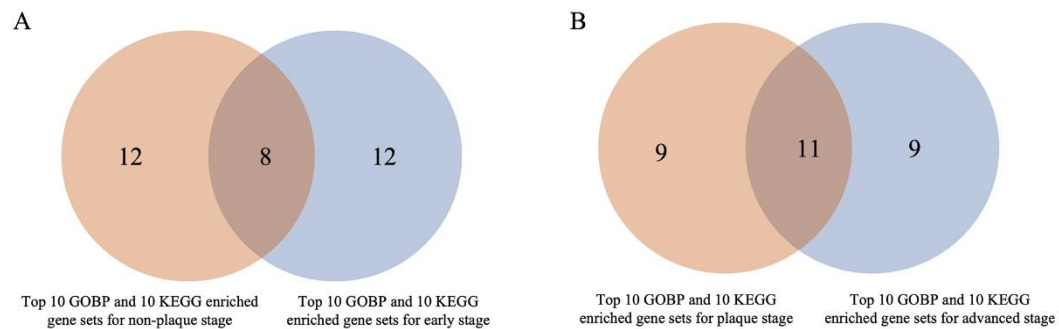

**Figure S1 Venn diagrams showing the common gene sets for the top 10 GOBP and 10 KEGG enriched gene sets in different atherosclerotic plaque stages based on the dataset of GSE43292 and GSE28829.** (A) Venn diagrams showing the common gene sets between the top 10 GOBP and 10 KEGG enriched gene sets in non-plaque stage and early stage when comparing non-plaque stage with plaque stage and early stage with the advanced stage. (B) Venn diagrams show the common gene sets between the top 10 GOBP and 10 KEGG enriched gene sets in plaque and advanced stages when compared to the non-plaque stage with plaque and early stage with advanced stage.

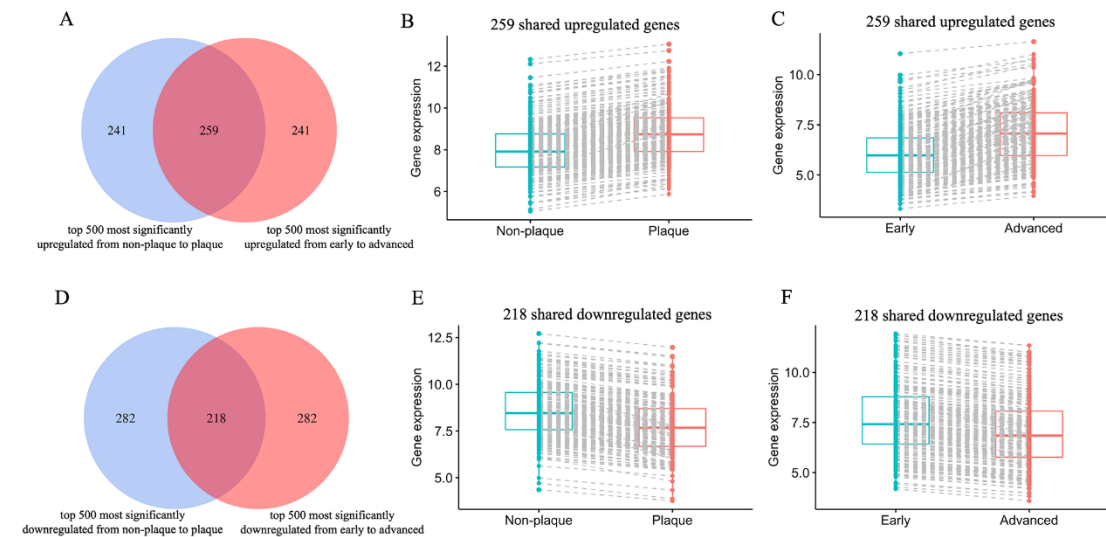

**Figure S2 The common genes for the top 500 most significantly differential expression genes in different atherosclerotic plaque stages based on the dataset of GSE43292 and GSE28829.** (A) The Venn diagram of the top 500 most significantly upregulated genes from non-plaque to plaque and early to the advanced stage. (B) The boxplot of 259 common upregulated genes from the non-plaque stage to the plaque stage in the dataset of GSE43292. (C) The boxplot of 259 common upregulated genes from early to advanced stage in the dataset of GSE28829. (D) The Venn diagram of the top 500 most significantly downregulated genes from non-plaque to plaque and early to advanced stage. (E) The boxplot of 218 common downregulated genes from non-plaque stage to the plaque stage in the dataset of GSE43292. (F) The boxplot of 218 common downregulated genes from early to advanced stage in the dataset of GSE28829.

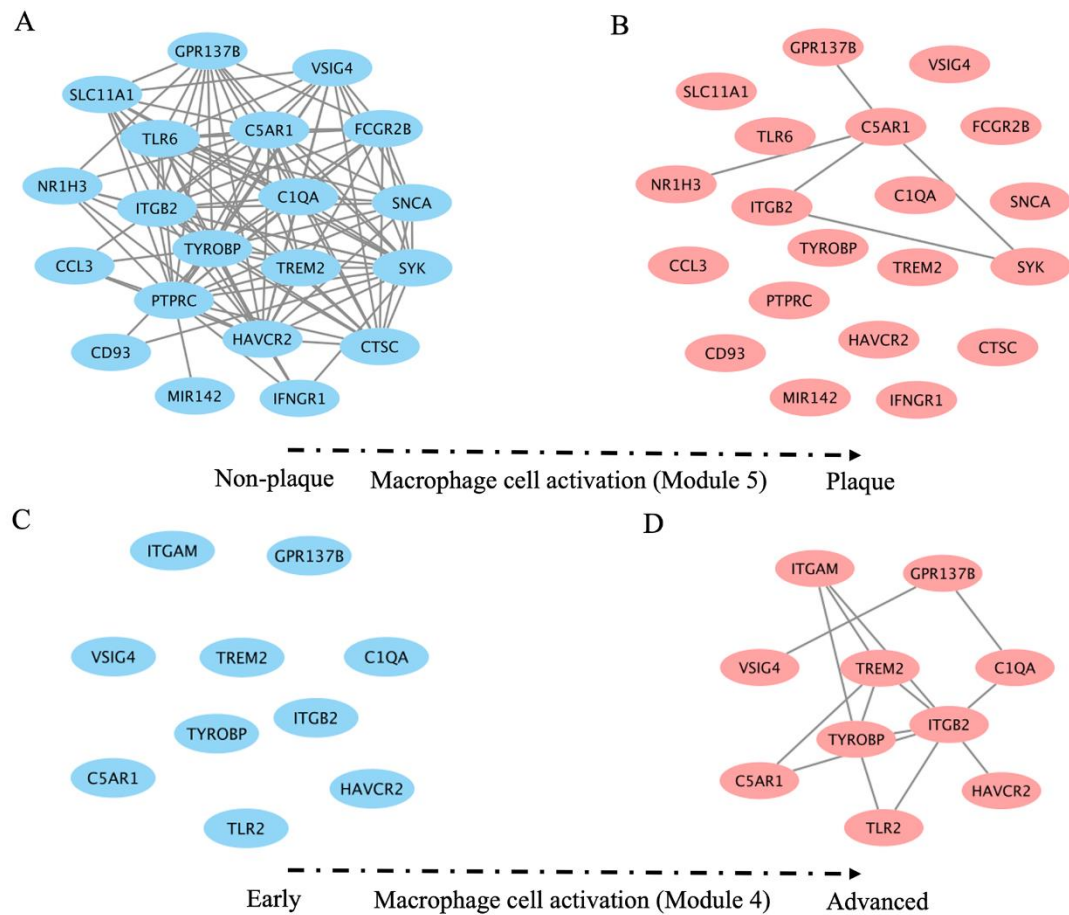

**Figure S3 The connectivity of genes related to macrophage cell activation in modules.** (A & B) The connectivity of genes related to macrophage cell activation in module 5 for the non-plaque stage and plaque stage based on multiple stages weighted gene co-expression network analysis in GSE43292. (C & D) The connectivity of genes related to macrophage cell activation in module 4 based on multiple stages weighted gene co-expression network analysis in GSE28829. Gene pairs with topological overlap matrix (TOM)>0.1 were connected with edges.

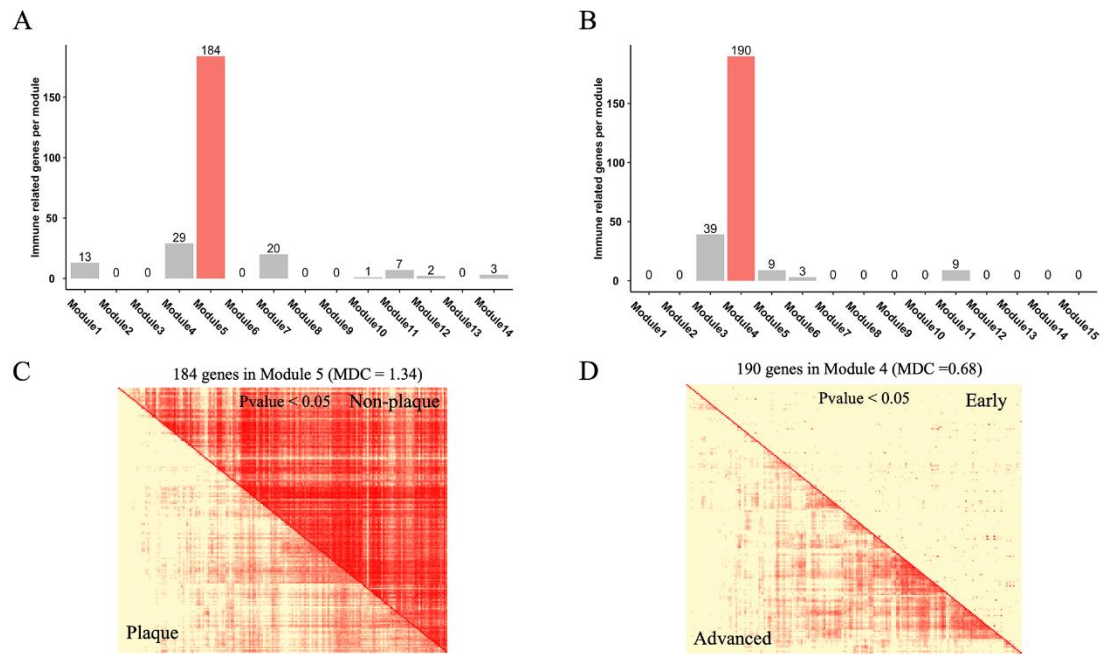

**Figure S4 The 259 commonly upregulated genes related to immune response pathways in the co-expression modules.** (A & B) Fold enrichment of the 259 commonly upregulated genes in the co-expression modules of multiple stages weighted gene co-expression network analysis in GSE43292 and GSE28829 datasets, respectively. (C) Heatmap of gene-gene correlation of genes enriched in module 5 of multiple stages weighted gene co-expression network based on the dataset of GSE43292. (D) Heatmap of gene-gene correlation of genes enriched in module 4 of multiple stages weighted gene co-expression network based on the dataset of GSE28829.

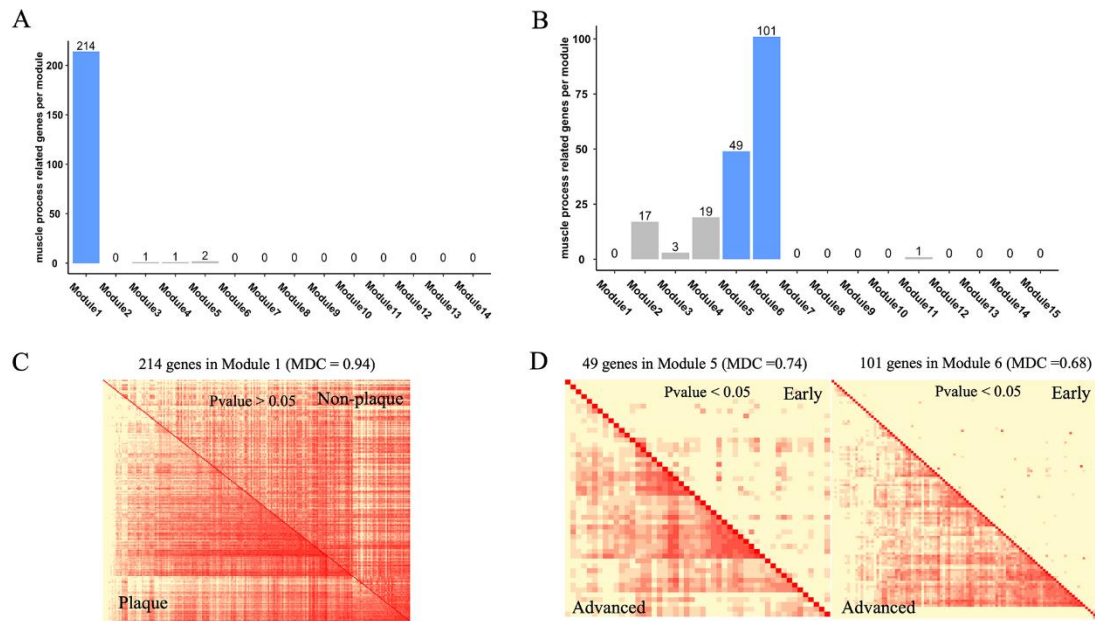

**Figure S5 The 218 commonly downregulated genes related to muscle system pathways in the co-expression modules. (A & B) Fold enrichment of the 218 common downregulated genes in the co-expression modules multiple stages weighted gene co-expression network analysis in GSE43292 and GSE28829 datasets, respectively. (C) Heatmap of gene-gene correlation of genes enriched in module 1 of multiple stages weighted gene co-expression network based on the dataset of GSE43292. (D) Heatmap of gene-gene correlation of genes enriched in modules 5 and 6 of various stages weighted gene co-expression network based on the dataset of GSE28829.**

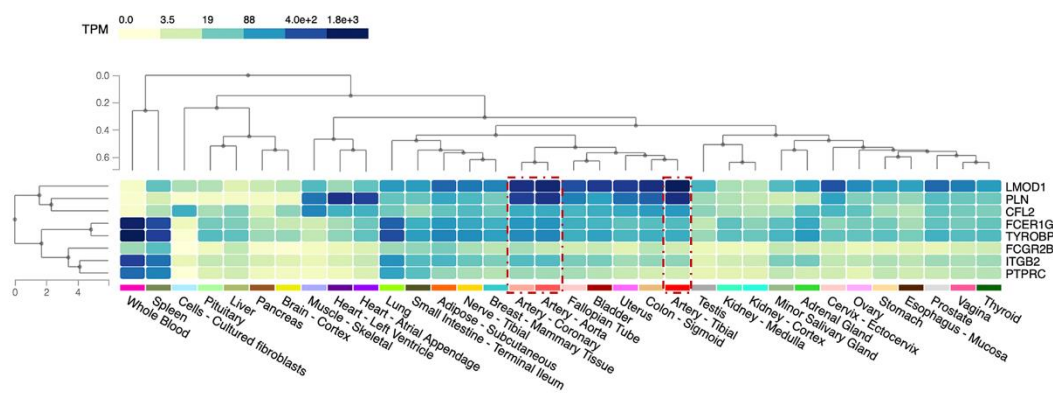

**Figure S6 The expression profiles of eight critical genes in human tissues (from GTEx Portal: <https://gtexportal.org/home/>). The x-axis represents multiple tissues. Different colors represent the normalized gene expression.**

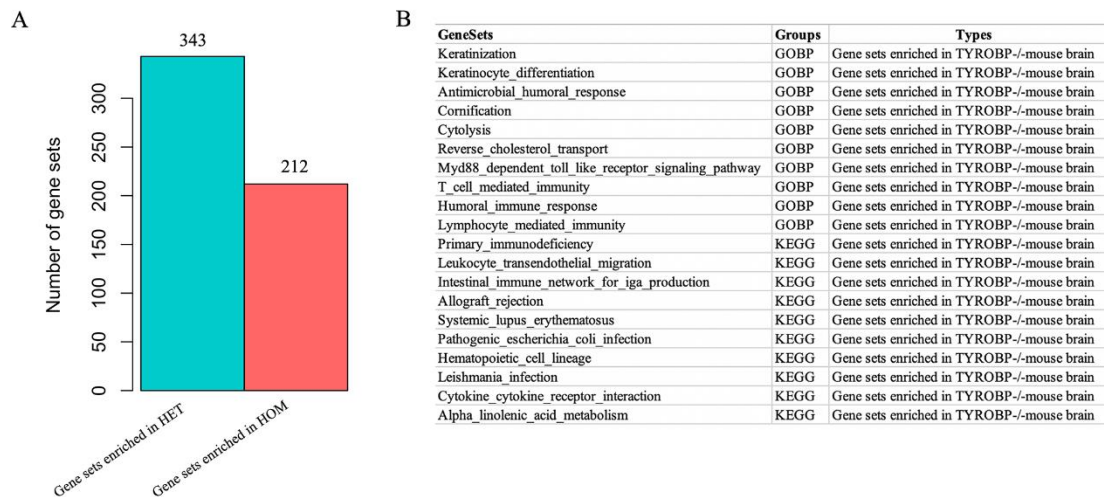

**Figure S7 The summary of GSEA analysis based on the dataset of GSE9083. (A)**

Histogram of the number of genes sets enriched in TYROBP<sup>+/-</sup> and TYROBP<sup>-/-</sup> samples, respectively. (B) The top 10 enriched GOBP and KEGG gene sets in TYROBP<sup>-/-</sup> samples.



A

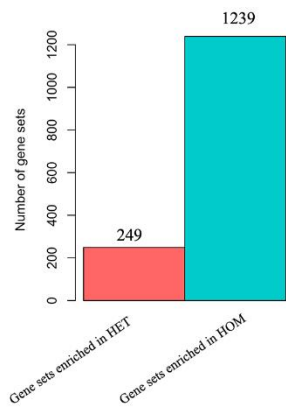

B

| Genesets                                            | Groups | Types                                     |
|-----------------------------------------------------|--------|-------------------------------------------|
| Mitochondrial respiratory chain complex assembly    | GOBP   | Gene sets enriched in PLN wt/R14del group |
| Respiratory electron transport chain                | GOBP   | Gene sets enriched in PLN wt/R14del group |
| Cellular respiration                                | GOBP   | Gene sets enriched in PLN wt/R14del group |
| Atp synthesis coupled electron transport            | GOBP   | Gene sets enriched in PLN wt/R14del group |
| Mitochondrial gene expression                       | GOBP   | Gene sets enriched in PLN wt/R14del group |
| Mitochondrial translation                           | GOBP   | Gene sets enriched in PLN wt/R14del group |
| Nadh dehydrogenase complex assembly                 | GOBP   | Gene sets enriched in PLN wt/R14del group |
| Oxidative phosphorylation                           | GOBP   | Gene sets enriched in PLN wt/R14del group |
| Mitochondrial translational termination             | GOBP   | Gene sets enriched in PLN wt/R14del group |
| Mitochondrial electron transport nadh to ubiquinone | GOBP   | Gene sets enriched in PLN wt/R14del group |
| Oxidative phosphorylation                           | KEGG   | Gene sets enriched in PLN wt/R14del group |
| Citrate cycle tca cycle                             | KEGG   | Gene sets enriched in PLN wt/R14del group |
| Parkinsons disease                                  | KEGG   | Gene sets enriched in PLN wt/R14del group |
| Valine leucine and isoleucine degradation           | KEGG   | Gene sets enriched in PLN wt/R14del group |
| Fatty acid metabolism                               | KEGG   | Gene sets enriched in PLN wt/R14del group |
| Propanoate metabolism                               | KEGG   | Gene sets enriched in PLN wt/R14del group |
| Peroxisome                                          | KEGG   | Gene sets enriched in PLN wt/R14del group |
| Huntingtons disease                                 | KEGG   | Gene sets enriched in PLN wt/R14del group |
| Aminoacyl trna biosynthesis                         | KEGG   | Gene sets enriched in PLN wt/R14del group |
| Lysine degradation                                  | KEGG   | Gene sets enriched in PLN wt/R14del group |

**Figure S8 The summary of GSEA analysis based on the dataset of GSE168610.**

**(A)** Histogram of the number of genes sets enriched in PLN<sup>+/-</sup> and PLN<sup>-/-</sup> samples, respectively. **(B)** The top 10 enriched GOBP and KEGG gene sets in PLN<sup>+/-</sup> samples.

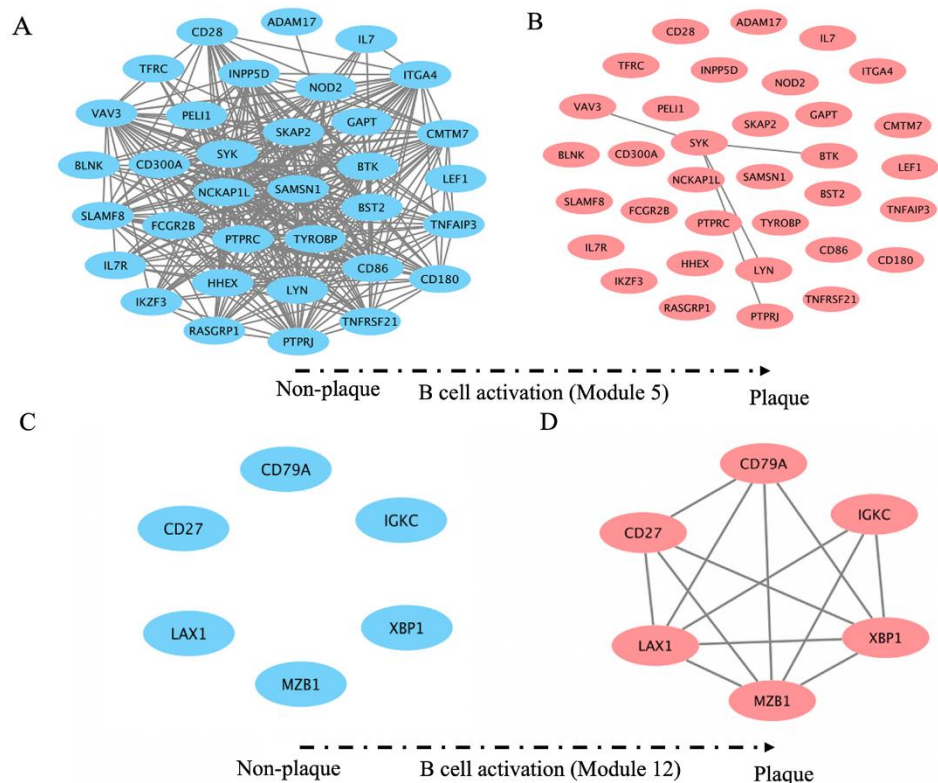

**Figure S9 The connectivity of genes related to B cell activation in modules 5 and 12 based on multiple stages weighted gene co-expression network from the dataset of GSE43292.** (A & B) The connectivity of genes related to B cell activation in module 5 for the non-plaque stage and plaque stage based on multiple stages weighted gene co-expression network analysis in GSE43292. (C & D) The connectivity of genes related to B cell activation in module 12 for the non-plaque stage and plaque stage based on multiple stages weighted gene co-expression network analysis in GSE43292. Gene pairs with topological overlap matrix (TOM)>0.1 were connected with edges.

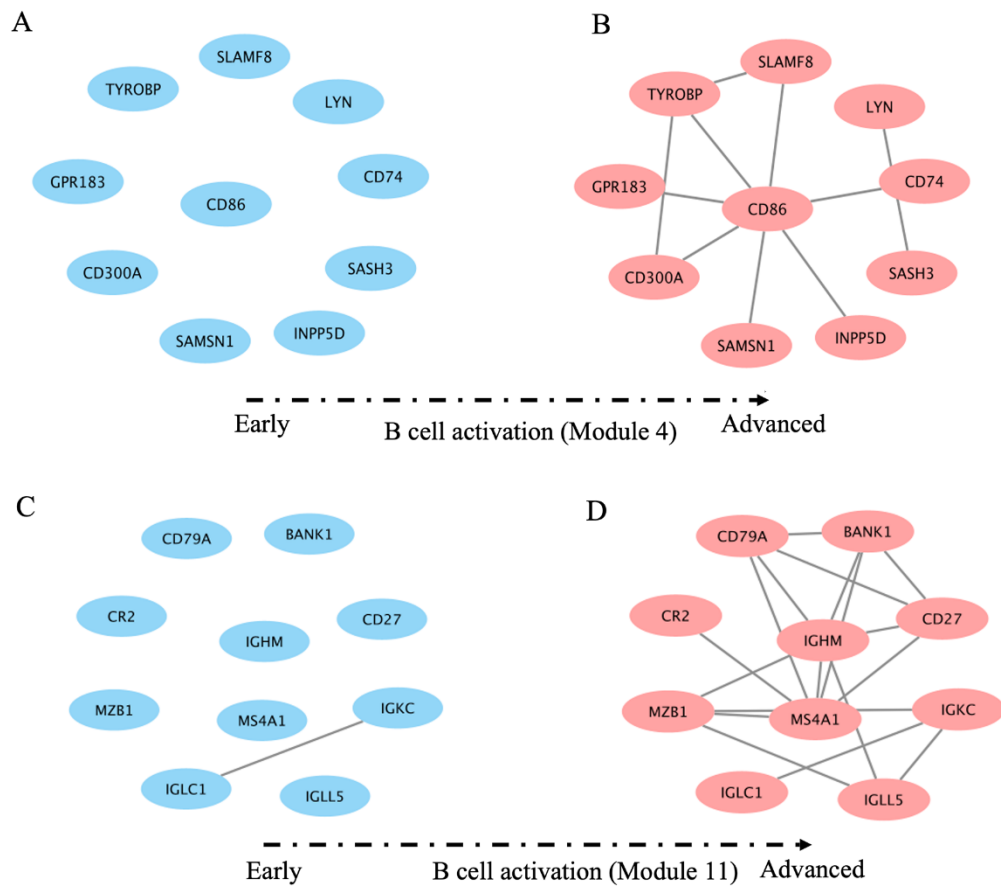

**Figure S10 The connectivity of genes related to B cell activation in modules 4 and 11 based on multiple stages weighted gene co-expression network from the dataset of GSE28829.** (A & B) The connectivity of genes related to B cell activation in module 4 for early and advanced stages based on multiple stages weighted gene co-expression network analysis in GSE28829. (C & D) The connectivity of genes related to B cell activation in module 11 for early and advanced stages based on multiple stages weighted gene co-expression network analysis in GSE28829. Gene pairs with topological overlap matrix (TOM)>0.1 were connected with edges.

## **Supplementally Tables**

**Table S1** The differential genes with  $FDR < 0.01$  at different stages of atherosclerotic plaques based on the datasets of GSE43282 and GSE28829.

**Table S2** The GO and KEGG analysis of the 259 commonly upregulated genes.

**Table S3** The GO and KEGG analysis of the 218 commonly downregulated genes.

**Table S4** The modular differential connectivity analysis results based on datasets of non-plaque and plaque stages.

**Table S5** The enrichment pathways of modules 3, 5, 7, and 12 using GO analysis.

**Table S6** The results of modular differential connectivity analysis based on datasets of early and advanced stages.

**Table S7** The enrichment pathways of modules 4, 11, and 15 using GO analysis.
