# Supplementary material for: Bioinformatic Analysis Revealed the Essential Regulatory Genes and Pathways of Early and Advanced Atherosclerotic Plaque in Humans
Source: Cells. 2022 Dec 8;11(24):3976. doi: 10.3390/cells11243976 (PMC9776921; doi:10.3390/cells11243976)
Supplement: Supplementary file 1 [file cells-11-03976-s001.zip]

Archive with 8 entries (8 files):
- cells-20274052_revised supplementary data_12_01.pdf
- Table S1.xlsx
- Table S2.xlsx
- Table S3.xlsx
- Table S4.xlsx
- Table S5.xlsx
- Table S6.xlsx
- Table S7.xlsx
