# Supplementary material for: Bioinformatic Analysis Revealed the Essential Regulatory Genes and Pathways of Early and Advanced Atherosclerotic Plaque in Humans
Source: Cells. 2022 Dec 8;11(24):3976. doi: 10.3390/cells11243976 (PMC9776921; doi:10.3390/cells11243976)
Supplement: Supplementary file 1 [file cells-11-03976-s001.zip › Table S1.xlsx]

## Sheet: Table S1
Table S1 The differential genes with FDR < 0.01 in different stages of atherosclerotic plaques based on the dataset of GSE43282 and GSE28829
Genes	Mean_Non-plaque	Mean_Plaque	Qvalue	Qvalue<0.01	Types
MKNK1	8.96711	9.43937	1.19996e-05	TRUE	non-plaque vs plaque
NRP1	9.65489	10.2435	1.19996e-05	TRUE	non-plaque vs plaque
TMEM106A	7.43925	7.96161	1.19996e-05	TRUE	non-plaque vs plaque
TRIM25	7.78875	8.19105	1.19996e-05	TRUE	non-plaque vs plaque
MXRA7	8.90643	8.51187	1.19996e-05	TRUE	non-plaque vs plaque
CNTN4	8.23956	6.44723	1.19996e-05	TRUE	non-plaque vs plaque
RAB23	9.42389	8.49295	1.19996e-05	TRUE	non-plaque vs plaque
MPP6	7.9803	6.92291	1.19996e-05	TRUE	non-plaque vs plaque
MARK1	7.40541	6.52642	1.33925e-05	TRUE	non-plaque vs plaque
RCC2	7.9276	8.30166	1.33925e-05	TRUE	non-plaque vs plaque
CASQ2	9.38367	7.716	1.33925e-05	TRUE	non-plaque vs plaque
WDFY4	6.97162	7.70827	1.33925e-05	TRUE	non-plaque vs plaque
PAK1	8.54584	8.9331	1.33925e-05	TRUE	non-plaque vs plaque
MTUS2	7.73947	6.78606	1.33925e-05	TRUE	non-plaque vs plaque
CAB39L	8.12468	7.19664	1.33925e-05	TRUE	non-plaque vs plaque
NUMB	8.66418	8.96236	1.33925e-05	TRUE	non-plaque vs plaque
CATSPERB	5.8618	4.89822	1.33925e-05	TRUE	non-plaque vs plaque
RASL12	7.97198	7.24051	1.33925e-05	TRUE	non-plaque vs plaque
XPO6	8.84112	9.15637	1.33925e-05	TRUE	non-plaque vs plaque
DCAF7	8.52342	8.75624	1.33925e-05	TRUE	non-plaque vs plaque
RNF213	8.98217	9.52075	1.33925e-05	TRUE	non-plaque vs plaque
DOK6	5.67763	5.17154	1.33925e-05	TRUE	non-plaque vs plaque
CDH19	4.59773	3.82563	1.33925e-05	TRUE	non-plaque vs plaque
CNN1	9.63246	8.49189	1.33925e-05	TRUE	non-plaque vs plaque
SP140	6.07875	6.81356	1.33925e-05	TRUE	non-plaque vs plaque
SEC23B	8.61785	8.96269	1.33925e-05	TRUE	non-plaque vs plaque
SIGLEC1	6.7639	7.51148	1.33925e-05	TRUE	non-plaque vs plaque
MX2	7.39532	8.37971	1.33925e-05	TRUE	non-plaque vs plaque
SMTN	8.23698	7.38646	1.33925e-05	TRUE	non-plaque vs plaque
PXYLP1	7.00381	6.40636	1.33925e-05	TRUE	non-plaque vs plaque
FILIP1L	9.26682	8.4898	1.33925e-05	TRUE	non-plaque vs plaque
IBSP	7.01225	8.80723	1.33925e-05	TRUE	non-plaque vs plaque
HAND2	7.00056	6.29377	1.33925e-05	TRUE	non-plaque vs plaque
ZSWIM6	8.81709	9.17413	1.33925e-05	TRUE	non-plaque vs plaque
ADRA1B	7.22839	6.65192	1.33925e-05	TRUE	non-plaque vs plaque
RIMS1	5.00398	4.5586	1.33925e-05	TRUE	non-plaque vs plaque
FHL5	8.81004	7.24538	1.33925e-05	TRUE	non-plaque vs plaque
ELOVL4	5.44032	4.98209	1.33925e-05	TRUE	non-plaque vs plaque
GPC3	6.34344	5.43791	1.33925e-05	TRUE	non-plaque vs plaque
PSD4	6.40776	6.98302	1.36478e-05	TRUE	non-plaque vs plaque
SLC22A3	9.53407	8.40583	1.39473e-05	TRUE	non-plaque vs plaque
NEGR1	8.34325	7.24263	1.47683e-05	TRUE	non-plaque vs plaque
CNTN1	7.94535	6.03432	1.49708e-05	TRUE	non-plaque vs plaque
OAS1	7.75923	8.63457	1.49708e-05	TRUE	non-plaque vs plaque
CFL2	9.82348	9.00006	1.50094e-05	TRUE	non-plaque vs plaque
RNPEP	8.60454	9.02168	1.50771e-05	TRUE	non-plaque vs plaque
IL31RA	6.13773	4.96233	1.50771e-05	TRUE	non-plaque vs plaque
FKBP15	8.54177	9.10115	1.5514e-05	TRUE	non-plaque vs plaque
SFMBT2	7.1982	7.9365	1.56866e-05	TRUE	non-plaque vs plaque
ZFP36L1	9.05296	9.43059	1.56866e-05	TRUE	non-plaque vs plaque
NOD2	5.76054	6.30113	1.56866e-05	TRUE	non-plaque vs plaque
NXPH3	8.04702	7.48086	1.56866e-05	TRUE	non-plaque vs plaque
CD38	5.77799	6.54651	1.56866e-05	TRUE	non-plaque vs plaque
METTL24	7.08021	6.08195	1.56866e-05	TRUE	non-plaque vs plaque
DIP2B	8.00151	8.32716	1.58685e-05	TRUE	non-plaque vs plaque
OAS2	7.35526	8.17868	1.58685e-05	TRUE	non-plaque vs plaque
SPAG16	6.6633	6.25144	1.58685e-05	TRUE	non-plaque vs plaque
STAT1	10.0152	10.4677	1.58685e-05	TRUE	non-plaque vs plaque
C8orf48	5.53707	5.05338	1.58685e-05	TRUE	non-plaque vs plaque
DUSP26	7.12809	6.31742	1.58685e-05	TRUE	non-plaque vs plaque
TBC1D9	8.52071	8.91126	1.68328e-05	TRUE	non-plaque vs plaque
ENAH	9.63897	8.86787	1.68335e-05	TRUE	non-plaque vs plaque
HSPB8	9.08314	8.14494	1.76009e-05	TRUE	non-plaque vs plaque
NLK	7.15033	7.43831	1.76009e-05	TRUE	non-plaque vs plaque
BAG2	8.64322	7.87894	1.79486e-05	TRUE	non-plaque vs plaque
FIBIN	9.82198	8.66067	1.85345e-05	TRUE	non-plaque vs plaque
TPP1	9.22086	9.81714	1.85345e-05	TRUE	non-plaque vs plaque
SERGEF	7.87231	7.51152	1.85345e-05	TRUE	non-plaque vs plaque
PTPN11	10.4196	10.0559	1.85345e-05	TRUE	non-plaque vs plaque
OAS3	6.84749	7.62457	1.85345e-05	TRUE	non-plaque vs plaque
MYOCD	8.97039	7.34194	1.85345e-05	TRUE	non-plaque vs plaque
REEP1	6.50344	5.66282	1.85345e-05	TRUE	non-plaque vs plaque
FZD5	6.45102	6.78494	1.85345e-05	TRUE	non-plaque vs plaque
RUNX1	8.34632	8.72866	1.85345e-05	TRUE	non-plaque vs plaque
PARP14	9.05097	9.57212	1.85345e-05	TRUE	non-plaque vs plaque
RUNX2	6.20763	6.67781	1.85345e-05	TRUE	non-plaque vs plaque
NEU1	8.1335	8.59791	1.85345e-05	TRUE	non-plaque vs plaque
RNASET2	6.78624	7.52987	1.90728e-05	TRUE	non-plaque vs plaque
CMTM7	7.64577	8.30841	1.92757e-05	TRUE	non-plaque vs plaque
FABP4	4.34393	6.79839	1.96267e-05	TRUE	non-plaque vs plaque
HCST	7.30712	8.13767	2.00138e-05	TRUE	non-plaque vs plaque
PGM5	7.87329	6.89833	2.00542e-05	TRUE	non-plaque vs plaque
CMPK1	10.0501	9.84307	2.06074e-05	TRUE	non-plaque vs plaque
ATP1A2	7.37179	6.51961	2.06074e-05	TRUE	non-plaque vs plaque
SYNC	7.80619	6.96999	2.06074e-05	TRUE	non-plaque vs plaque
ARHGAP30	7.24981	8.03869	2.06074e-05	TRUE	non-plaque vs plaque
WDR37	7.34268	7.58579	2.06074e-05	TRUE	non-plaque vs plaque
ZEB1	9.59197	8.92314	2.06074e-05	TRUE	non-plaque vs plaque
GRK5	7.8057	7.15518	2.06074e-05	TRUE	non-plaque vs plaque
SLC3A2	8.32012	8.75878	2.06074e-05	TRUE	non-plaque vs plaque
LAYN	6.91018	6.45807	2.06074e-05	TRUE	non-plaque vs plaque
ANKS1B	6.309	5.45227	2.06074e-05	TRUE	non-plaque vs plaque
WASF3	7.29638	6.85696	2.06074e-05	TRUE	non-plaque vs plaque
SLAIN1	6.3623	5.79359	2.06074e-05	TRUE	non-plaque vs plaque
C14orf132	7.16881	6.50401	2.06074e-05	TRUE	non-plaque vs plaque
FERMT2	9.91605	9.21622	2.06074e-05	TRUE	non-plaque vs plaque
SPRED1	9.44065	9.69462	2.06074e-05	TRUE	non-plaque vs plaque
ARRDC4	8.77451	9.31828	2.06074e-05	TRUE	non-plaque vs plaque
LARP6	7.92565	7.61016	2.06074e-05	TRUE	non-plaque vs plaque
CMIP	7.34303	8.17068	2.06074e-05	TRUE	non-plaque vs plaque
SEC14L1	8.00166	8.42757	2.06074e-05	TRUE	non-plaque vs plaque
CASP10	5.74154	6.33389	2.06074e-05	TRUE	non-plaque vs plaque
INPP5D	8.00054	8.7338	2.06074e-05	TRUE	non-plaque vs plaque
NECTIN3	8.14475	7.5387	2.06074e-05	TRUE	non-plaque vs plaque
PDZRN3	8.6528	7.58099	2.06074e-05	TRUE	non-plaque vs plaque
C1QTNF2	6.76403	6.36252	2.06074e-05	TRUE	non-plaque vs plaque
MARCKS	9.65241	10.1279	2.06074e-05	TRUE	non-plaque vs plaque
FAXC	6.47117	5.77864	2.06074e-05	TRUE	non-plaque vs plaque
TES	10.6729	10.0697	2.06074e-05	TRUE	non-plaque vs plaque
OSBPL3	6.97615	7.78282	2.06074e-05	TRUE	non-plaque vs plaque
SGCE	9.56979	8.74857	2.06074e-05	TRUE	non-plaque vs plaque
VIPR2	6.36864	5.58604	2.06074e-05	TRUE	non-plaque vs plaque
CHD7	6.29441	6.85988	2.06074e-05	TRUE	non-plaque vs plaque
PABPC1	11.1938	11.3865	2.06074e-05	TRUE	non-plaque vs plaque
KLHL13	6.71167	6.08494	2.06074e-05	TRUE	non-plaque vs plaque
HSPB7	8.25946	7.31199	2.0642e-05	TRUE	non-plaque vs plaque
NOX4	10.2706	9.38857	2.0642e-05	TRUE	non-plaque vs plaque
SEMA4D	6.12498	6.44716	2.0642e-05	TRUE	non-plaque vs plaque
LARGE1	7.0981	6.61655	2.06934e-05	TRUE	non-plaque vs plaque
ACTN2	6.53755	5.66882	2.09231e-05	TRUE	non-plaque vs plaque
LPAR1	9.54905	8.90454	2.09231e-05	TRUE	non-plaque vs plaque
RAC2	7.91146	8.77668	2.11102e-05	TRUE	non-plaque vs plaque
PCDH20	6.5713	5.45705	2.11672e-05	TRUE	non-plaque vs plaque
RPS6KA6	7.40967	6.04047	2.12656e-05	TRUE	non-plaque vs plaque
JARID2	7.15864	7.60063	2.14307e-05	TRUE	non-plaque vs plaque
TC2N	10.2488	9.33203	2.16325e-05	TRUE	non-plaque vs plaque
NEXN	10.4236	9.39687	2.184e-05	TRUE	non-plaque vs plaque
ST7	7.84143	7.39073	2.184e-05	TRUE	non-plaque vs plaque
ITIH5	8.24668	7.52943	2.19258e-05	TRUE	non-plaque vs plaque
SPARCL1	12.4775	11.7261	2.19258e-05	TRUE	non-plaque vs plaque
TMEM106C	8.36392	7.89302	2.19977e-05	TRUE	non-plaque vs plaque
MAX	7.54551	7.7413	2.19977e-05	TRUE	non-plaque vs plaque
ADAP2	8.66942	9.50589	2.19977e-05	TRUE	non-plaque vs plaque
STK39	8.87544	8.49143	2.19977e-05	TRUE	non-plaque vs plaque
ACADL	7.60152	6.40359	2.19977e-05	TRUE	non-plaque vs plaque
STK4	9.36902	9.69896	2.19977e-05	TRUE	non-plaque vs plaque
LRRN1	6.07974	4.80741	2.19977e-05	TRUE	non-plaque vs plaque
SLC6A6	8.82845	9.56362	2.19977e-05	TRUE	non-plaque vs plaque
DTX3L	8.73344	9.24408	2.19977e-05	TRUE	non-plaque vs plaque
NUP210	6.46047	7.02967	2.19977e-05	TRUE	non-plaque vs plaque
SEL1L3	7.43528	8.47863	2.19977e-05	TRUE	non-plaque vs plaque
TNFSF15	5.84454	6.40072	2.19977e-05	TRUE	non-plaque vs plaque
ACRBP	5.97616	6.32655	2.21554e-05	TRUE	non-plaque vs plaque
RERG	8.96053	8.08814	2.21554e-05	TRUE	non-plaque vs plaque
ARHGEF3	6.78643	7.42567	2.21554e-05	TRUE	non-plaque vs plaque
PARM1	8.48847	7.55774	2.21554e-05	TRUE	non-plaque vs plaque
PRDM5	7.27329	6.76034	2.21554e-05	TRUE	non-plaque vs plaque
PAM	10.8177	10.2126	2.21554e-05	TRUE	non-plaque vs plaque
DAB2	10.1669	10.8137	2.21554e-05	TRUE	non-plaque vs plaque
FILIP1	8.66014	7.73437	2.21554e-05	TRUE	non-plaque vs plaque
PERP	7.93048	7.44541	2.21554e-05	TRUE	non-plaque vs plaque
MYBL1	7.22175	6.5495	2.21554e-05	TRUE	non-plaque vs plaque
TCEAL2	8.77061	7.73958	2.2292e-05	TRUE	non-plaque vs plaque
NECAP2	9.48886	9.84424	2.2554e-05	TRUE	non-plaque vs plaque
OTUD7B	7.60199	7.05403	2.2554e-05	TRUE	non-plaque vs plaque
CYTH4	8.46518	9.34198	2.2554e-05	TRUE	non-plaque vs plaque
PARP9	8.41797	8.88311	2.2554e-05	TRUE	non-plaque vs plaque
SH3BP2	6.41515	6.93937	2.2554e-05	TRUE	non-plaque vs plaque
SLC2A12	6.46664	5.45915	2.2554e-05	TRUE	non-plaque vs plaque
C1orf162	8.32722	9.25144	2.27678e-05	TRUE	non-plaque vs plaque
HEATR3	7.2519	7.64232	2.27678e-05	TRUE	non-plaque vs plaque
RPS6KA1	7.0271	7.72364	2.30297e-05	TRUE	non-plaque vs plaque
RGL1	8.32046	8.93838	2.31363e-05	TRUE	non-plaque vs plaque
HHEX	7.76886	8.28713	2.39156e-05	TRUE	non-plaque vs plaque
ANO1	9.14331	8.37066	2.39156e-05	TRUE	non-plaque vs plaque
KLHL42	8.32397	7.75953	2.39156e-05	TRUE	non-plaque vs plaque
EPSTI1	5.94722	6.80534	2.39156e-05	TRUE	non-plaque vs plaque
TWSG1	10.0819	9.48512	2.39156e-05	TRUE	non-plaque vs plaque
PYGO1	6.76327	6.2488	2.43189e-05	TRUE	non-plaque vs plaque
LRRC8C	7.3329	7.70308	2.43273e-05	TRUE	non-plaque vs plaque
CREG1	9.60287	10.1058	2.43273e-05	TRUE	non-plaque vs plaque
PPP2R2B	7.70153	7.02776	2.43273e-05	TRUE	non-plaque vs plaque
ELMO1	7.83812	8.47518	2.43273e-05	TRUE	non-plaque vs plaque
TTYH2	6.63875	6.98127	2.46942e-05	TRUE	non-plaque vs plaque
PGR	8.23911	7.24719	2.48538e-05	TRUE	non-plaque vs plaque
GZMB	6.3738	7.08452	2.48538e-05	TRUE	non-plaque vs plaque
GPAT3	6.29821	7.00743	2.48538e-05	TRUE	non-plaque vs plaque
TAPBP	8.91299	9.34386	2.48538e-05	TRUE	non-plaque vs plaque
GAB3	6.86904	7.30127	2.48538e-05	TRUE	non-plaque vs plaque
MPP7	8.55906	7.58794	2.48731e-05	TRUE	non-plaque vs plaque
GNG12	10.6622	10.1826	2.5088e-05	TRUE	non-plaque vs plaque
CHKA	6.16307	6.61499	2.5088e-05	TRUE	non-plaque vs plaque
GRN	10.7068	11.4712	2.5088e-05	TRUE	non-plaque vs plaque
FCGRT	8.74684	9.40125	2.5088e-05	TRUE	non-plaque vs plaque
DPP4	6.79205	8.40292	2.5088e-05	TRUE	non-plaque vs plaque
NRROS	7.08041	7.59774	2.51102e-05	TRUE	non-plaque vs plaque
PLCB4	6.96753	5.77302	2.51477e-05	TRUE	non-plaque vs plaque
YAP1	9.97185	9.29789	2.54066e-05	TRUE	non-plaque vs plaque
PDZRN4	6.61128	5.64729	2.54066e-05	TRUE	non-plaque vs plaque
HPD	5.77357	5.35451	2.54066e-05	TRUE	non-plaque vs plaque
GPR132	6.13522	6.61803	2.54066e-05	TRUE	non-plaque vs plaque
CNDP2	8.4871	9.16978	2.54066e-05	TRUE	non-plaque vs plaque
NLRP3	6.83453	7.54639	2.57755e-05	TRUE	non-plaque vs plaque
TMED5	9.12772	9.42769	2.57755e-05	TRUE	non-plaque vs plaque
XAF1	8.37628	8.95658	2.57755e-05	TRUE	non-plaque vs plaque
DOCK4	8.49439	9.12675	2.57755e-05	TRUE	non-plaque vs plaque
POLR1E	7.28677	6.84886	2.57755e-05	TRUE	non-plaque vs plaque
ITGB7	6.8491	7.72315	2.59728e-05	TRUE	non-plaque vs plaque
LGALS9	5.7786	6.53494	2.59728e-05	TRUE	non-plaque vs plaque
CNTN3	7.6435	6.28176	2.59728e-05	TRUE	non-plaque vs plaque
CKMT2	7.48473	6.74464	2.59728e-05	TRUE	non-plaque vs plaque
PRUNE2	9.71502	8.64432	2.59728e-05	TRUE	non-plaque vs plaque
ANGPTL1	6.68501	5.55176	2.60469e-05	TRUE	non-plaque vs plaque
PLD5	6.83792	5.72654	2.60469e-05	TRUE	non-plaque vs plaque
BMPR1A	10.3197	9.54015	2.60469e-05	TRUE	non-plaque vs plaque
KCNA5	7.34308	6.46075	2.60469e-05	TRUE	non-plaque vs plaque
RASSF3	8.49368	8.04498	2.60469e-05	TRUE	non-plaque vs plaque
PYGL	9.34929	9.83505	2.60469e-05	TRUE	non-plaque vs plaque
SF3B3	9.10016	9.25715	2.60469e-05	TRUE	non-plaque vs plaque
MAF	7.71865	8.21506	2.60469e-05	TRUE	non-plaque vs plaque
VAPB	8.28576	7.98276	2.60469e-05	TRUE	non-plaque vs plaque
MYOZ2	8.16239	7.31074	2.60469e-05	TRUE	non-plaque vs plaque
PRDM1	6.95476	7.95987	2.60469e-05	TRUE	non-plaque vs plaque
DLG3	7.1544	6.5597	2.60469e-05	TRUE	non-plaque vs plaque
NAP1L3	8.43882	7.64324	2.60469e-05	TRUE	non-plaque vs plaque
PGD	9.0062	9.94694	2.63111e-05	TRUE	non-plaque vs plaque
EPB41L5	7.26823	6.60182	2.65229e-05	TRUE	non-plaque vs plaque
PRKX	7.77567	8.13243	2.65229e-05	TRUE	non-plaque vs plaque
LRRC1	7.07378	6.5214	2.66587e-05	TRUE	non-plaque vs plaque
ADCY7	7.73475	8.34724	2.72854e-05	TRUE	non-plaque vs plaque
ZFYVE9	6.60787	6.0164	2.72942e-05	TRUE	non-plaque vs plaque
CACNB2	7.02546	6.4485	2.72942e-05	TRUE	non-plaque vs plaque
MLEC	8.54211	8.79273	2.72942e-05	TRUE	non-plaque vs plaque
FBLN5	11.4167	10.6668	2.72942e-05	TRUE	non-plaque vs plaque
IL17RA	7.89346	8.37749	2.72942e-05	TRUE	non-plaque vs plaque
ZNF385D	9.00217	8.14797	2.72942e-05	TRUE	non-plaque vs plaque
RBM47	8.12378	8.93937	2.72942e-05	TRUE	non-plaque vs plaque
DNAJC18	7.58824	7.10616	2.72942e-05	TRUE	non-plaque vs plaque
ABCB1	5.94356	6.4703	2.72942e-05	TRUE	non-plaque vs plaque
GRIA3	4.64702	4.08489	2.72942e-05	TRUE	non-plaque vs plaque
LRMP	7.02833	7.76701	2.77096e-05	TRUE	non-plaque vs plaque
VAV3	6.51516	7.54189	2.79736e-05	TRUE	non-plaque vs plaque
SGPL1	8.67932	9.20895	2.79736e-05	TRUE	non-plaque vs plaque
SLC16A7	8.38369	7.81556	2.79736e-05	TRUE	non-plaque vs plaque
STAT2	8.575	8.86234	2.79736e-05	TRUE	non-plaque vs plaque
GIT2	8.74893	9.04103	2.79736e-05	TRUE	non-plaque vs plaque
EDEM1	7.95609	8.2727	2.79736e-05	TRUE	non-plaque vs plaque
TMEM43	10.1279	9.71994	2.79736e-05	TRUE	non-plaque vs plaque
ATP6V1A	9.13458	9.69816	2.79736e-05	TRUE	non-plaque vs plaque
MFAP3L	6.20156	5.73647	2.79736e-05	TRUE	non-plaque vs plaque
SCRG1	7.67982	6.51965	2.79736e-05	TRUE	non-plaque vs plaque
PDZD2	6.17055	5.60494	2.79736e-05	TRUE	non-plaque vs plaque
NPR3	8.2295	6.9683	2.79736e-05	TRUE	non-plaque vs plaque
SLC36A1	7.32481	7.87948	2.79736e-05	TRUE	non-plaque vs plaque
TTC33	7.62887	7.1766	2.79736e-05	TRUE	non-plaque vs plaque
DOK3	6.44216	6.85532	2.79736e-05	TRUE	non-plaque vs plaque
TNFRSF21	7.66282	8.4773	2.79736e-05	TRUE	non-plaque vs plaque
LYN	8.9727	9.77403	2.79736e-05	TRUE	non-plaque vs plaque
REEP4	6.67294	7.14894	2.79736e-05	TRUE	non-plaque vs plaque
ASAP1	8.96531	9.46978	2.79736e-05	TRUE	non-plaque vs plaque
MIB1	8.81747	8.31506	2.79763e-05	TRUE	non-plaque vs plaque
RIPK3	6.37485	6.8707	2.80255e-05	TRUE	non-plaque vs plaque
FAM78A	6.32529	6.89764	2.80872e-05	TRUE	non-plaque vs plaque
TXK	5.25078	5.85041	2.86576e-05	TRUE	non-plaque vs plaque
ATP2B1	8.82263	9.32941	2.87896e-05	TRUE	non-plaque vs plaque
NRP2	8.41304	8.96408	2.87896e-05	TRUE	non-plaque vs plaque
SESTD1	9.88036	9.40057	2.87896e-05	TRUE	non-plaque vs plaque
GKAP1	5.75854	5.12294	2.87896e-05	TRUE	non-plaque vs plaque
ID4	9.87273	9.07208	2.92117e-05	TRUE	non-plaque vs plaque
CORO1A	8.36884	9.05587	2.92597e-05	TRUE	non-plaque vs plaque
MAGED2	9.54515	9.11555	2.92597e-05	TRUE	non-plaque vs plaque
ATG7	8.561	8.99934	2.92806e-05	TRUE	non-plaque vs plaque
H2AFY	9.13456	9.69243	2.9837e-05	TRUE	non-plaque vs plaque
CSF1R	8.84621	9.70364	2.9837e-05	TRUE	non-plaque vs plaque
BEND5	6.34878	5.82192	2.9841e-05	TRUE	non-plaque vs plaque
PDLIM1	9.25699	8.85053	2.98578e-05	TRUE	non-plaque vs plaque
FXYD1	8.60357	7.9497	2.99302e-05	TRUE	non-plaque vs plaque
LONRF2	7.12466	6.34279	2.99302e-05	TRUE	non-plaque vs plaque
PGRMC1	10.493	10.1171	2.99302e-05	TRUE	non-plaque vs plaque
BTK	7.18312	8.07657	2.99302e-05	TRUE	non-plaque vs plaque
MACROD2	4.97806	4.69511	3.01217e-05	TRUE	non-plaque vs plaque
WIPF1	9.70103	10.0663	3.04275e-05	TRUE	non-plaque vs plaque
PDLIM3	9.55412	8.83663	3.04275e-05	TRUE	non-plaque vs plaque
THSD7A	5.48878	6.13059	3.05487e-05	TRUE	non-plaque vs plaque
RALGPS2	5.41443	6.21377	3.07712e-05	TRUE	non-plaque vs plaque
CRYAB	10.7628	10.0228	3.08495e-05	TRUE	non-plaque vs plaque
KIAA0226L	6.77451	7.44923	3.08495e-05	TRUE	non-plaque vs plaque
HMOX1	7.77826	9.19776	3.08495e-05	TRUE	non-plaque vs plaque
OSBPL11	7.31241	7.71154	3.08495e-05	TRUE	non-plaque vs plaque
MTRF1L	8.75354	8.53514	3.08495e-05	TRUE	non-plaque vs plaque
MAP3K1	8.87318	9.37133	3.08495e-05	TRUE	non-plaque vs plaque
SRGAP2	7.22308	7.57183	3.11181e-05	TRUE	non-plaque vs plaque
C5orf24	9.47416	9.03004	3.11399e-05	TRUE	non-plaque vs plaque
PILRA	7.29868	7.98921	3.11399e-05	TRUE	non-plaque vs plaque
HTR1B	7.66748	7.3358	3.15906e-05	TRUE	non-plaque vs plaque
GPAM	6.88945	6.5383	3.17307e-05	TRUE	non-plaque vs plaque
TYROBP	10.0202	10.8617	3.17307e-05	TRUE	non-plaque vs plaque
ENOX2	7.91967	7.51591	3.17307e-05	TRUE	non-plaque vs plaque
SLMAP	9.5453	8.98647	3.18295e-05	TRUE	non-plaque vs plaque
CCR1	7.32866	8.50812	3.18295e-05	TRUE	non-plaque vs plaque
AOC3	8.61391	8.01799	3.19175e-05	TRUE	non-plaque vs plaque
CHST11	8.76075	9.19643	3.21604e-05	TRUE	non-plaque vs plaque
CD300A	8.22541	9.14586	3.21604e-05	TRUE	non-plaque vs plaque
DNAJB5	8.46615	7.98406	3.2199e-05	TRUE	non-plaque vs plaque
MPP1	9.25874	10.0007	3.23464e-05	TRUE	non-plaque vs plaque
GNAL	7.12457	6.58109	3.27585e-05	TRUE	non-plaque vs plaque
CCM2	7.373	7.64959	3.29845e-05	TRUE	non-plaque vs plaque
TFPI2	6.80539	5.92209	3.29845e-05	TRUE	non-plaque vs plaque
IL6R	6.79895	7.51234	3.31702e-05	TRUE	non-plaque vs plaque
GRK3	7.59	8.34349	3.31876e-05	TRUE	non-plaque vs plaque
SSX2IP	6.9441	6.48828	3.33043e-05	TRUE	non-plaque vs plaque
ADAR	9.26203	9.43735	3.33043e-05	TRUE	non-plaque vs plaque
SERINC5	7.70023	8.07046	3.33043e-05	TRUE	non-plaque vs plaque
SV2A	7.25702	6.60773	3.33743e-05	TRUE	non-plaque vs plaque
PTPRJ	8.9798	9.64635	3.33743e-05	TRUE	non-plaque vs plaque
MANSC1	8.3269	7.54561	3.33743e-05	TRUE	non-plaque vs plaque
PRKCH	7.55329	8.23438	3.33743e-05	TRUE	non-plaque vs plaque
FLNC	7.74676	6.97775	3.33743e-05	TRUE	non-plaque vs plaque
TPM2	11.634	10.9356	3.33743e-05	TRUE	non-plaque vs plaque
TMEM47	11.3654	10.4545	3.33743e-05	TRUE	non-plaque vs plaque
GLMP	7.58603	8.02643	3.3856e-05	TRUE	non-plaque vs plaque
WARS	8.53207	9.06122	3.3856e-05	TRUE	non-plaque vs plaque
EFTUD2	8.1339	8.54485	3.3856e-05	TRUE	non-plaque vs plaque
NDUFAF2	6.66085	6.44156	3.3856e-05	TRUE	non-plaque vs plaque
FGD2	6.8808	7.47598	3.3856e-05	TRUE	non-plaque vs plaque
PPP1R3B	8.35533	7.91795	3.3856e-05	TRUE	non-plaque vs plaque
KANK1	8.73645	7.91397	3.3856e-05	TRUE	non-plaque vs plaque
TSPAN2	9.06593	8.16497	3.40085e-05	TRUE	non-plaque vs plaque
UBA2	9.71529	9.3239	3.40085e-05	TRUE	non-plaque vs plaque
FMOD	10.6986	9.98213	3.40105e-05	TRUE	non-plaque vs plaque
MYO5A	8.54859	9.22086	3.4036e-05	TRUE	non-plaque vs plaque
SLC25A19	6.12076	6.62192	3.4036e-05	TRUE	non-plaque vs plaque
CAPZB	10.454	10.6352	3.41313e-05	TRUE	non-plaque vs plaque
MYL9	10.7227	10.2008	3.41313e-05	TRUE	non-plaque vs plaque
EDEM2	7.17925	7.59778	3.41313e-05	TRUE	non-plaque vs plaque
LCP2	8.49152	9.31094	3.41313e-05	TRUE	non-plaque vs plaque
ZDHHC3	7.45079	7.65526	3.42026e-05	TRUE	non-plaque vs plaque
VANGL1	6.26529	6.06328	3.42859e-05	TRUE	non-plaque vs plaque
RYR2	7.68549	6.44405	3.42859e-05	TRUE	non-plaque vs plaque
PARVA	10.1042	9.73626	3.42859e-05	TRUE	non-plaque vs plaque
PLCG2	9.64022	9.98862	3.42859e-05	TRUE	non-plaque vs plaque
PARP15	5.60768	6.39478	3.42859e-05	TRUE	non-plaque vs plaque
DCSTAMP	5.07281	6.07863	3.42859e-05	TRUE	non-plaque vs plaque
STAB1	8.05646	8.94981	3.42999e-05	TRUE	non-plaque vs plaque
TMEM2	8.01881	8.72716	3.43765e-05	TRUE	non-plaque vs plaque
GPR63	5.43716	4.80545	3.47337e-05	TRUE	non-plaque vs plaque
ARPC3	10.625	10.992	3.49603e-05	TRUE	non-plaque vs plaque
ALG3	8.23494	8.46978	3.49603e-05	TRUE	non-plaque vs plaque
NPNT	10.0238	8.95843	3.49603e-05	TRUE	non-plaque vs plaque
BLNK	6.81545	7.41057	3.49799e-05	TRUE	non-plaque vs plaque
ATP11A	7.01748	7.62105	3.49799e-05	TRUE	non-plaque vs plaque
LINC00670	7.11926	5.88262	3.49799e-05	TRUE	non-plaque vs plaque
NKIRAS1	7.27487	6.90377	3.49799e-05	TRUE	non-plaque vs plaque
FSTL1	11.4975	11.1396	3.49799e-05	TRUE	non-plaque vs plaque
LAP3	8.74438	9.24462	3.49799e-05	TRUE	non-plaque vs plaque
STK10	7.74079	8.60625	3.49799e-05	TRUE	non-plaque vs plaque
TCEAL7	6.09383	5.66227	3.49799e-05	TRUE	non-plaque vs plaque
SMPX	4.35731	3.75604	3.49799e-05	TRUE	non-plaque vs plaque
PLEK	8.85291	9.95765	3.51584e-05	TRUE	non-plaque vs plaque
RALGAPA2	7.53315	7.85592	3.51584e-05	TRUE	non-plaque vs plaque
FAM129A	11.1148	10.5604	3.51889e-05	TRUE	non-plaque vs plaque
CD163	10.2681	11.3986	3.51889e-05	TRUE	non-plaque vs plaque
CALML4	6.20727	6.69468	3.52142e-05	TRUE	non-plaque vs plaque
CD300C	7.42302	7.98819	3.5848e-05	TRUE	non-plaque vs plaque
CXorf38	7.14461	7.44722	3.60317e-05	TRUE	non-plaque vs plaque
ADPGK	7.51273	8.00199	3.61206e-05	TRUE	non-plaque vs plaque
RNF115	8.58855	8.03791	3.6431e-05	TRUE	non-plaque vs plaque
PRKD1	8.23243	7.6569	3.6431e-05	TRUE	non-plaque vs plaque
SYNRG	8.17914	8.40561	3.6431e-05	TRUE	non-plaque vs plaque
IL1RN	6.2343	7.62879	3.6431e-05	TRUE	non-plaque vs plaque
ROCK2	9.95646	9.48817	3.6431e-05	TRUE	non-plaque vs plaque
IDH1	9.5714	10.1715	3.6431e-05	TRUE	non-plaque vs plaque
AGTR1	6.12217	5.6304	3.6431e-05	TRUE	non-plaque vs plaque
PDE8B	7.43297	6.20093	3.6431e-05	TRUE	non-plaque vs plaque
HLA-DOB	5.13708	5.77986	3.6431e-05	TRUE	non-plaque vs plaque
EPM2A	6.75239	6.35417	3.6431e-05	TRUE	non-plaque vs plaque
ARHGDIB	10.9253	11.3403	3.64874e-05	TRUE	non-plaque vs plaque
STRN3	9.45323	9.07401	3.64874e-05	TRUE	non-plaque vs plaque
GPR176	8.21642	7.83887	3.64874e-05	TRUE	non-plaque vs plaque
SLC39A11	7.4511	7.9569	3.64874e-05	TRUE	non-plaque vs plaque
AKT3	9.47418	8.95421	3.66212e-05	TRUE	non-plaque vs plaque
AMPD3	7.41901	8.15448	3.66212e-05	TRUE	non-plaque vs plaque
PATL1	8.54749	8.87012	3.66212e-05	TRUE	non-plaque vs plaque
NCKAP1L	8.94594	9.90539	3.66212e-05	TRUE	non-plaque vs plaque
METAP2	9.33108	9.07518	3.66212e-05	TRUE	non-plaque vs plaque
MOAP1	8.02262	7.77252	3.66212e-05	TRUE	non-plaque vs plaque
LAIR1	8.96559	9.86114	3.66212e-05	TRUE	non-plaque vs plaque
ARHGAP25	7.18044	7.93061	3.66212e-05	TRUE	non-plaque vs plaque
NAGK	9.97644	10.4042	3.66212e-05	TRUE	non-plaque vs plaque
OSR1	7.40629	6.78467	3.66212e-05	TRUE	non-plaque vs plaque
TRPC1	8.34234	7.58181	3.66212e-05	TRUE	non-plaque vs plaque
ARHGEF26	7.25804	6.41786	3.66212e-05	TRUE	non-plaque vs plaque
PKD2	10.9142	10.2102	3.66212e-05	TRUE	non-plaque vs plaque
MTSS1	7.95079	8.70508	3.66212e-05	TRUE	non-plaque vs plaque
TMOD1	8.66266	7.92308	3.66212e-05	TRUE	non-plaque vs plaque
NRK	6.66176	5.70456	3.66212e-05	TRUE	non-plaque vs plaque
MLKL	7.35773	7.74212	3.67329e-05	TRUE	non-plaque vs plaque
TREML1	5.72366	6.0109	3.68785e-05	TRUE	non-plaque vs plaque
PRKCD	8.32808	8.83233	3.70527e-05	TRUE	non-plaque vs plaque
MCAM	9.96578	9.12635	3.77197e-05	TRUE	non-plaque vs plaque
DNMT1	7.62906	8.00555	3.77197e-05	TRUE	non-plaque vs plaque
NDRG3	8.76421	8.36784	3.77197e-05	TRUE	non-plaque vs plaque
METAP1	9.30977	8.87836	3.77197e-05	TRUE	non-plaque vs plaque
SLC20A2	8.80255	8.25916	3.77197e-05	TRUE	non-plaque vs plaque
CD4	8.88099	9.81591	3.77573e-05	TRUE	non-plaque vs plaque
AKAP6	9.42453	8.53048	3.77573e-05	TRUE	non-plaque vs plaque
KIAA1549L	4.81543	5.17013	3.78969e-05	TRUE	non-plaque vs plaque
APOOL	8.32226	7.81415	3.78969e-05	TRUE	non-plaque vs plaque
EID1	10.7424	10.4333	3.79196e-05	TRUE	non-plaque vs plaque
ITGAL	6.41375	7.17704	3.79881e-05	TRUE	non-plaque vs plaque
C12orf29	7.73664	7.33901	3.82126e-05	TRUE	non-plaque vs plaque
WNK3	4.4795	3.98898	3.82126e-05	TRUE	non-plaque vs plaque
SLA	7.35149	8.26299	3.82917e-05	TRUE	non-plaque vs plaque
FMNL1	7.5433	8.2461	3.84092e-05	TRUE	non-plaque vs plaque
LEF1	5.58781	6.20559	3.84092e-05	TRUE	non-plaque vs plaque
TAP2	6.92032	7.32185	3.84092e-05	TRUE	non-plaque vs plaque
DOCK2	8.56406	9.45281	3.84607e-05	TRUE	non-plaque vs plaque
RAP2B	8.6467	9.21444	3.85822e-05	TRUE	non-plaque vs plaque
TP53INP1	8.65374	8.99425	3.86532e-05	TRUE	non-plaque vs plaque
ACSL5	7.09361	7.88555	3.87357e-05	TRUE	non-plaque vs plaque
CLIC4	12.1414	11.8435	3.88e-05	TRUE	non-plaque vs plaque
FAM53B	6.88752	7.22073	3.88e-05	TRUE	non-plaque vs plaque
NAV3	5.18865	5.63115	3.88e-05	TRUE	non-plaque vs plaque
GAS7	7.07789	7.62835	3.88e-05	TRUE	non-plaque vs plaque
GJC1	7.75083	7.13814	3.88e-05	TRUE	non-plaque vs plaque
CYTH1	7.71538	8.3432	3.88e-05	TRUE	non-plaque vs plaque
NLGN1	6.65324	5.61522	3.88e-05	TRUE	non-plaque vs plaque
SGCB	10.0895	9.46693	3.88e-05	TRUE	non-plaque vs plaque
PPP1R9A	5.68378	4.93816	3.88e-05	TRUE	non-plaque vs plaque
ITGB1BP2	5.96185	5.45754	3.88e-05	TRUE	non-plaque vs plaque
ARPC1B	9.33521	9.83017	3.8904e-05	TRUE	non-plaque vs plaque
MDM2	9.57042	9.79529	3.91338e-05	TRUE	non-plaque vs plaque
TLE4	7.32063	7.61516	3.91418e-05	TRUE	non-plaque vs plaque
APBB1IP	7.34791	8.23395	3.92537e-05	TRUE	non-plaque vs plaque
PPP1R12A	10.3201	9.80845	3.92537e-05	TRUE	non-plaque vs plaque
THEMIS2	7.10102	7.8512	3.92541e-05	TRUE	non-plaque vs plaque
PTGDS	6.87656	7.36596	3.92541e-05	TRUE	non-plaque vs plaque
TCEAL5	5.39089	5.01678	3.92541e-05	TRUE	non-plaque vs plaque
IKBKE	6.54086	6.85316	3.98086e-05	TRUE	non-plaque vs plaque
GRB2	9.29814	9.75223	3.98086e-05	TRUE	non-plaque vs plaque
TBXAS1	7.80301	8.57076	3.98086e-05	TRUE	non-plaque vs plaque
DAGLB	6.94983	7.31219	3.98086e-05	TRUE	non-plaque vs plaque
FBXO21	8.17575	7.87891	3.99008e-05	TRUE	non-plaque vs plaque
PLCB2	7.3826	8.05223	3.99008e-05	TRUE	non-plaque vs plaque
CASP2	7.47343	7.66919	3.99008e-05	TRUE	non-plaque vs plaque
GNS	10.5325	10.9558	3.99975e-05	TRUE	non-plaque vs plaque
RAB9B	7.04329	6.42031	3.99975e-05	TRUE	non-plaque vs plaque
YARS	7.83136	8.0991	4.0018e-05	TRUE	non-plaque vs plaque
PTPN1	8.74629	8.97501	4.0018e-05	TRUE	non-plaque vs plaque
CASQ1	6.01515	5.44876	4.02186e-05	TRUE	non-plaque vs plaque
DDX60L	8.12293	9.04889	4.02828e-05	TRUE	non-plaque vs plaque
ZNF711	6.84576	5.96735	4.0622e-05	TRUE	non-plaque vs plaque
SIPA1L2	7.45671	7.94769	4.07268e-05	TRUE	non-plaque vs plaque
TMEM206	6.33398	6.83326	4.08854e-05	TRUE	non-plaque vs plaque
NABP1	8.5881	9.43363	4.08854e-05	TRUE	non-plaque vs plaque
NCEH1	8.24378	8.99964	4.12041e-05	TRUE	non-plaque vs plaque
CTSA	10.0623	10.4843	4.12103e-05	TRUE	non-plaque vs plaque
TMEM26	5.54267	6.00516	4.12565e-05	TRUE	non-plaque vs plaque
NCKAP1	10.5074	9.90394	4.12565e-05	TRUE	non-plaque vs plaque
CBY1	6.43935	6.17022	4.12565e-05	TRUE	non-plaque vs plaque
FGF2	8.65236	8.1705	4.12565e-05	TRUE	non-plaque vs plaque
PITPNB	10.6329	10.2612	4.12788e-05	TRUE	non-plaque vs plaque
NPL	8.11626	9.18263	4.13402e-05	TRUE	non-plaque vs plaque
GLUL	10.3907	10.9518	4.13402e-05	TRUE	non-plaque vs plaque
LPXN	7.76548	8.45972	4.13402e-05	TRUE	non-plaque vs plaque
HSPA2	7.95915	7.38751	4.13402e-05	TRUE	non-plaque vs plaque
PRKCB	6.91707	7.73179	4.13402e-05	TRUE	non-plaque vs plaque
SECTM1	6.46706	6.98382	4.13402e-05	TRUE	non-plaque vs plaque
SLC25A4	9.28385	8.58862	4.13402e-05	TRUE	non-plaque vs plaque
IKZF1	6.30417	7.05645	4.13402e-05	TRUE	non-plaque vs plaque
ZBTB10	7.61468	7.22283	4.13402e-05	TRUE	non-plaque vs plaque
PTPN6	7.70317	8.51238	4.14048e-05	TRUE	non-plaque vs plaque
INPP5A	8.96937	8.34563	4.14538e-05	TRUE	non-plaque vs plaque
SYT11	9.61295	9.21861	4.15949e-05	TRUE	non-plaque vs plaque
DKK3	8.02684	7.57118	4.15949e-05	TRUE	non-plaque vs plaque
TPH1	9.66558	7.77896	4.15949e-05	TRUE	non-plaque vs plaque
SPTLC2	8.16259	8.45929	4.15949e-05	TRUE	non-plaque vs plaque
MEI1	5.09304	5.33212	4.15949e-05	TRUE	non-plaque vs plaque
MRAP2	9.83241	8.67417	4.15949e-05	TRUE	non-plaque vs plaque
CHFR	7.82142	8.09382	4.20146e-05	TRUE	non-plaque vs plaque
TEP1	7.58185	7.88384	4.2059e-05	TRUE	non-plaque vs plaque
MAP6	6.47839	6.11308	4.28025e-05	TRUE	non-plaque vs plaque
STXBP2	7.28805	7.97202	4.28025e-05	TRUE	non-plaque vs plaque
PLEKHB2	9.69742	10.2282	4.28025e-05	TRUE	non-plaque vs plaque
MAP2	7.88653	7.00326	4.28025e-05	TRUE	non-plaque vs plaque
ST3GAL5	7.42109	7.95009	4.28025e-05	TRUE	non-plaque vs plaque
DUSP27	7.32835	6.64542	4.29273e-05	TRUE	non-plaque vs plaque
CALCOCO1	9.41053	8.93069	4.29273e-05	TRUE	non-plaque vs plaque
RHOG	8.56831	8.89769	4.29995e-05	TRUE	non-plaque vs plaque
HVCN1	7.09159	7.48398	4.29995e-05	TRUE	non-plaque vs plaque
SP110	7.78979	8.17993	4.29995e-05	TRUE	non-plaque vs plaque
HDX	6.37253	5.9014	4.29995e-05	TRUE	non-plaque vs plaque
FERMT3	8.21461	9.04232	4.31253e-05	TRUE	non-plaque vs plaque
PPP1CA	8.74413	9.16823	4.31253e-05	TRUE	non-plaque vs plaque
RNASE1	10.8655	11.8432	4.31253e-05	TRUE	non-plaque vs plaque
APLF	6.99673	6.64034	4.31253e-05	TRUE	non-plaque vs plaque
ARHGAP10	8.77133	8.39748	4.31253e-05	TRUE	non-plaque vs plaque
DENND1B	7.20483	7.47171	4.35067e-05	TRUE	non-plaque vs plaque
LARP4B	8.14579	8.37456	4.35067e-05	TRUE	non-plaque vs plaque
SVIL	10.1402	9.38934	4.35067e-05	TRUE	non-plaque vs plaque
ANGEL1	7.09184	7.41373	4.35067e-05	TRUE	non-plaque vs plaque
PLEKHO2	8.4396	9.13598	4.35067e-05	TRUE	non-plaque vs plaque
VAV1	7.05933	7.78028	4.35067e-05	TRUE	non-plaque vs plaque
APOL6	7.63359	8.13984	4.35067e-05	TRUE	non-plaque vs plaque
BVES	7.08294	6.4109	4.35067e-05	TRUE	non-plaque vs plaque
SBDS	10.3656	9.98615	4.35067e-05	TRUE	non-plaque vs plaque
WDR91	7.59884	7.91541	4.35067e-05	TRUE	non-plaque vs plaque
PFN2	9.52199	8.69495	4.35853e-05	TRUE	non-plaque vs plaque
DIXDC1	8.59384	8.11226	4.37367e-05	TRUE	non-plaque vs plaque
OXCT1	8.47504	7.83155	4.37367e-05	TRUE	non-plaque vs plaque
NT5DC3	8.42273	7.52378	4.37475e-05	TRUE	non-plaque vs plaque
IFI35	7.42747	7.81084	4.37475e-05	TRUE	non-plaque vs plaque
C17orf62	7.41771	7.80209	4.37475e-05	TRUE	non-plaque vs plaque
TDO2	4.38557	5.53633	4.37475e-05	TRUE	non-plaque vs plaque
C1QA	8.4879	9.33029	4.38593e-05	TRUE	non-plaque vs plaque
TTLL7	9.73172	8.70565	4.38593e-05	TRUE	non-plaque vs plaque
LMOD1	10.0524	9.14023	4.38593e-05	TRUE	non-plaque vs plaque
PIK3AP1	8.54782	9.50552	4.38593e-05	TRUE	non-plaque vs plaque
IL10RA	8.11693	9.02229	4.38593e-05	TRUE	non-plaque vs plaque
BAZ1A	7.75827	8.25459	4.38593e-05	TRUE	non-plaque vs plaque
TTBK2	8.13982	7.84554	4.38593e-05	TRUE	non-plaque vs plaque
RFWD3	7.21252	7.42157	4.38593e-05	TRUE	non-plaque vs plaque
MYOM1	7.79755	6.78834	4.38593e-05	TRUE	non-plaque vs plaque
GNA15	6.89674	7.57032	4.38593e-05	TRUE	non-plaque vs plaque
PART1	5.00044	4.44385	4.38593e-05	TRUE	non-plaque vs plaque
MAPK13	6.79762	7.59438	4.38593e-05	TRUE	non-plaque vs plaque
SDK1	7.39229	6.79562	4.38593e-05	TRUE	non-plaque vs plaque
SYK	8.35488	9.2107	4.38593e-05	TRUE	non-plaque vs plaque
TCEAL1	8.69986	8.25364	4.38593e-05	TRUE	non-plaque vs plaque
LDOC1	8.89544	7.98601	4.38593e-05	TRUE	non-plaque vs plaque
ME2	9.53518	10.1024	4.39141e-05	TRUE	non-plaque vs plaque
SPINT2	8.86216	8.38871	4.40576e-05	TRUE	non-plaque vs plaque
LGI1	5.75225	4.59581	4.411e-05	TRUE	non-plaque vs plaque
MBNL3	6.79144	7.33738	4.41888e-05	TRUE	non-plaque vs plaque
ZNF12	8.05249	7.77562	4.43087e-05	TRUE	non-plaque vs plaque
PIM2	6.89593	7.77103	4.43087e-05	TRUE	non-plaque vs plaque
PIK3CD	6.80669	7.21003	4.4463e-05	TRUE	non-plaque vs plaque
TRAPPC10	7.77421	8.05493	4.4463e-05	TRUE	non-plaque vs plaque
ADRA2C	7.28173	6.82431	4.4463e-05	TRUE	non-plaque vs plaque
BTC	6.08449	5.4487	4.4463e-05	TRUE	non-plaque vs plaque
CDO1	7.4234	6.75999	4.4463e-05	TRUE	non-plaque vs plaque
HAVCR2	7.71714	8.63902	4.4463e-05	TRUE	non-plaque vs plaque
FZD6	9.14667	8.60249	4.4463e-05	TRUE	non-plaque vs plaque
GPRIN3	7.60414	8.42846	4.4464e-05	TRUE	non-plaque vs plaque
ALDH1B1	10.5806	9.87592	4.4464e-05	TRUE	non-plaque vs plaque
SLC7A8	8.05123	8.71876	4.45047e-05	TRUE	non-plaque vs plaque
DYNC1LI2	10.1016	9.84193	4.45047e-05	TRUE	non-plaque vs plaque
EAF2	6.54521	6.91649	4.45047e-05	TRUE	non-plaque vs plaque
HCLS1	8.76581	9.48645	4.45047e-05	TRUE	non-plaque vs plaque
SYNPO2	11.0661	10.1635	4.45047e-05	TRUE	non-plaque vs plaque
SBSPON	8.30152	7.25926	4.45047e-05	TRUE	non-plaque vs plaque
DOCK8	8.2111	9.08928	4.45047e-05	TRUE	non-plaque vs plaque
TRIM14	7.04894	7.53391	4.45047e-05	TRUE	non-plaque vs plaque
TTYH3	7.46555	8.23447	4.454e-05	TRUE	non-plaque vs plaque
PTGS1	7.47588	8.06461	4.454e-05	TRUE	non-plaque vs plaque
CLUAP1	8.08414	7.75193	4.45651e-05	TRUE	non-plaque vs plaque
SH3BGR	7.27691	6.50137	4.45651e-05	TRUE	non-plaque vs plaque
CTNNAL1	7.3701	6.83563	4.45651e-05	TRUE	non-plaque vs plaque
ZFYVE26	7.74688	8.13914	4.48272e-05	TRUE	non-plaque vs plaque
PTPRE	7.80983	8.4848	4.48418e-05	TRUE	non-plaque vs plaque
LMCD1	9.59395	8.9662	4.48888e-05	TRUE	non-plaque vs plaque
GPLD1	6.55101	5.68243	4.48888e-05	TRUE	non-plaque vs plaque
TLR6	6.7975	7.53679	4.50273e-05	TRUE	non-plaque vs plaque
MAP1B	11.3563	10.6583	4.50273e-05	TRUE	non-plaque vs plaque
NAALADL2	6.94978	6.35643	4.54775e-05	TRUE	non-plaque vs plaque
CDC42SE1	8.25944	8.54887	4.55308e-05	TRUE	non-plaque vs plaque
GNPTAB	8.65739	9.13767	4.55308e-05	TRUE	non-plaque vs plaque
TCN2	7.6318	8.39464	4.55308e-05	TRUE	non-plaque vs plaque
RYK	9.44551	9.18893	4.55308e-05	TRUE	non-plaque vs plaque
FAM13B	9.24189	8.8682	4.55308e-05	TRUE	non-plaque vs plaque
LST1	7.63286	8.08539	4.55308e-05	TRUE	non-plaque vs plaque
CD33	6.74365	7.38981	4.55641e-05	TRUE	non-plaque vs plaque
PPP2R3A	7.11075	6.50037	4.55641e-05	TRUE	non-plaque vs plaque
HCP5	6.77705	7.38793	4.55641e-05	TRUE	non-plaque vs plaque
SERAC1	7.54911	7.12595	4.55641e-05	TRUE	non-plaque vs plaque
PLAUR	8.02846	8.90467	4.56136e-05	TRUE	non-plaque vs plaque
BIN2	6.87146	7.76524	4.56908e-05	TRUE	non-plaque vs plaque
ITGAM	8.4627	9.45578	4.56908e-05	TRUE	non-plaque vs plaque
HSPA4L	7.97163	7.13046	4.56908e-05	TRUE	non-plaque vs plaque
MPDU1	8.30847	8.89977	4.57019e-05	TRUE	non-plaque vs plaque
MAOB	9.24286	8.36895	4.57019e-05	TRUE	non-plaque vs plaque
IGKC	7.40178	8.79372	4.59715e-05	TRUE	non-plaque vs plaque
CD68	10.4365	11.3608	4.61266e-05	TRUE	non-plaque vs plaque
ADCY5	8.21869	7.28591	4.61266e-05	TRUE	non-plaque vs plaque
GALNT2	9.71675	9.3416	4.6311e-05	TRUE	non-plaque vs plaque
ESYT2	9.89255	9.57188	4.65633e-05	TRUE	non-plaque vs plaque
ATP6V0C	9.39292	9.83711	4.67333e-05	TRUE	non-plaque vs plaque
ARSJ	6.95929	6.36734	4.67333e-05	TRUE	non-plaque vs plaque
MYO1F	7.68038	8.43813	4.68957e-05	TRUE	non-plaque vs plaque
IL12RB1	6.07818	6.3909	4.68957e-05	TRUE	non-plaque vs plaque
MEIS1	8.3951	7.52831	4.68957e-05	TRUE	non-plaque vs plaque
RBFOX2	9.46129	8.9586	4.68957e-05	TRUE	non-plaque vs plaque
CHSY3	7.7662	7.07827	4.68957e-05	TRUE	non-plaque vs plaque
PAK3	7.25917	6.38393	4.68957e-05	TRUE	non-plaque vs plaque
PTPN18	7.147	7.56107	4.69127e-05	TRUE	non-plaque vs plaque
TIAM1	6.94716	7.6677	4.69211e-05	TRUE	non-plaque vs plaque
SCUBE3	8.65266	7.7551	4.72641e-05	TRUE	non-plaque vs plaque
LY9	5.78793	6.1664	4.72985e-05	TRUE	non-plaque vs plaque
FGD3	6.74527	7.11362	4.72996e-05	TRUE	non-plaque vs plaque
FLI1	8.01619	8.65413	4.75553e-05	TRUE	non-plaque vs plaque
M6PR	10.2746	10.7022	4.75553e-05	TRUE	non-plaque vs plaque
USP44	4.88822	4.47266	4.75553e-05	TRUE	non-plaque vs plaque
TMEM237	8.24888	7.65087	4.75553e-05	TRUE	non-plaque vs plaque
SHROOM3	7.75041	6.9075	4.75553e-05	TRUE	non-plaque vs plaque
CCDC170	5.74763	6.24092	4.75553e-05	TRUE	non-plaque vs plaque
SLC7A5	6.88014	7.31095	4.78981e-05	TRUE	non-plaque vs plaque
PMEPA1	9.22076	8.58733	4.78981e-05	TRUE	non-plaque vs plaque
SYNM	9.3568	8.61888	4.81355e-05	TRUE	non-plaque vs plaque
PPP1R14A	9.06246	8.37387	4.81355e-05	TRUE	non-plaque vs plaque
LHFPL2	9.16051	9.886	4.81355e-05	TRUE	non-plaque vs plaque
PDE7A	6.05896	6.6168	4.81355e-05	TRUE	non-plaque vs plaque
SEMA4A	6.04604	6.57748	4.82643e-05	TRUE	non-plaque vs plaque
SALL2	6.20112	5.79075	4.82909e-05	TRUE	non-plaque vs plaque
FAM20B	8.73392	8.43043	4.87273e-05	TRUE	non-plaque vs plaque
NEDD4L	5.80068	6.36291	4.87918e-05	TRUE	non-plaque vs plaque
WBSCR17	5.95041	5.47165	4.88592e-05	TRUE	non-plaque vs plaque
FEZ1	7.60141	7.11729	4.91999e-05	TRUE	non-plaque vs plaque
GGA2	8.1948	8.59269	4.91999e-05	TRUE	non-plaque vs plaque
SCIMP	7.68558	8.49746	4.91999e-05	TRUE	non-plaque vs plaque
MSANTD4	8.43328	8.13627	4.99655e-05	TRUE	non-plaque vs plaque
UHRF1BP1	6.72817	7.17254	4.99655e-05	TRUE	non-plaque vs plaque
CXorf21	6.96539	7.92261	5.00279e-05	TRUE	non-plaque vs plaque
P2RX4	7.98575	8.48425	5.02301e-05	TRUE	non-plaque vs plaque
MME	5.89392	7.37892	5.02301e-05	TRUE	non-plaque vs plaque
GAREM1	7.24259	6.5672	5.04301e-05	TRUE	non-plaque vs plaque
CPT2	6.60028	6.86098	5.05077e-05	TRUE	non-plaque vs plaque
ACP2	8.17768	8.86415	5.05776e-05	TRUE	non-plaque vs plaque
GULP1	8.83656	7.89127	5.05776e-05	TRUE	non-plaque vs plaque
ZMYND11	9.77872	9.46513	5.0596e-05	TRUE	non-plaque vs plaque
UBASH3B	6.43352	7.16322	5.13825e-05	TRUE	non-plaque vs plaque
KCNJ8	6.57902	6.24361	5.14656e-05	TRUE	non-plaque vs plaque
HSPB6	7.65555	7.05821	5.17745e-05	TRUE	non-plaque vs plaque
C14orf37	6.53641	5.88549	5.17747e-05	TRUE	non-plaque vs plaque
TM4SF18	6.47595	7.49921	5.17747e-05	TRUE	non-plaque vs plaque
CD84	7.48297	8.44202	5.2426e-05	TRUE	non-plaque vs plaque
SORBS1	10.0567	9.15753	5.2426e-05	TRUE	non-plaque vs plaque
IFI44	7.21648	8.12221	5.26606e-05	TRUE	non-plaque vs plaque
ACSS3	8.01336	7.39073	5.26606e-05	TRUE	non-plaque vs plaque
PKIG	8.10077	7.63888	5.26606e-05	TRUE	non-plaque vs plaque
OGFRL1	8.93508	9.31631	5.26606e-05	TRUE	non-plaque vs plaque
CCL21	5.98761	6.61479	5.26606e-05	TRUE	non-plaque vs plaque
THSD1	6.14344	6.41576	5.29014e-05	TRUE	non-plaque vs plaque
C2	7.81463	8.81763	5.29014e-05	TRUE	non-plaque vs plaque
RCL1	8.11264	7.69573	5.29014e-05	TRUE	non-plaque vs plaque
TTLL11	7.34108	6.96547	5.29014e-05	TRUE	non-plaque vs plaque
HABP4	8.58352	8.13098	5.33569e-05	TRUE	non-plaque vs plaque
DSTN	10.9347	10.329	5.35204e-05	TRUE	non-plaque vs plaque
ZNF239	5.62008	5.35354	5.36339e-05	TRUE	non-plaque vs plaque
ANPEP	7.23038	8.40422	5.36339e-05	TRUE	non-plaque vs plaque
HACD1	7.57079	6.73018	5.36543e-05	TRUE	non-plaque vs plaque
SLCO2B1	9.07025	9.89903	5.36543e-05	TRUE	non-plaque vs plaque
PTPN21	8.29975	7.60873	5.36543e-05	TRUE	non-plaque vs plaque
ZNF461	6.53797	6.1789	5.36543e-05	TRUE	non-plaque vs plaque
KCNMB1	8.57306	8.04077	5.37955e-05	TRUE	non-plaque vs plaque
RSF1	9.45228	9.08816	5.38107e-05	TRUE	non-plaque vs plaque
PXDC1	9.66426	9.1488	5.38107e-05	TRUE	non-plaque vs plaque
PHF10	9.19408	8.94775	5.38107e-05	TRUE	non-plaque vs plaque
C1QC	9.40033	10.2144	5.39231e-05	TRUE	non-plaque vs plaque
TNFRSF11A	6.42427	6.90297	5.39231e-05	TRUE	non-plaque vs plaque
HLF	7.93495	7.07056	5.40877e-05	TRUE	non-plaque vs plaque
HRC	5.85025	5.55989	5.40877e-05	TRUE	non-plaque vs plaque
GRAMD1B	6.07003	6.47078	5.41447e-05	TRUE	non-plaque vs plaque
SAMSN1	6.86304	7.68762	5.483e-05	TRUE	non-plaque vs plaque
SH3D19	8.95696	8.39896	5.5279e-05	TRUE	non-plaque vs plaque
RGS5	12.717	11.9781	5.54023e-05	TRUE	non-plaque vs plaque
PRCP	9.31352	9.7736	5.54023e-05	TRUE	non-plaque vs plaque
NPR1	7.74996	6.6732	5.54301e-05	TRUE	non-plaque vs plaque
KCTD10	9.86848	9.41063	5.54301e-05	TRUE	non-plaque vs plaque
IRF8	8.84686	9.68251	5.54301e-05	TRUE	non-plaque vs plaque
PTBP1	9.00357	9.17727	5.54301e-05	TRUE	non-plaque vs plaque
MAN2B1	8.48323	9.15802	5.54301e-05	TRUE	non-plaque vs plaque
BARD1	7.59517	7.0108	5.54301e-05	TRUE	non-plaque vs plaque
HM13	8.57946	8.92077	5.54301e-05	TRUE	non-plaque vs plaque
RPN2	10.1596	10.3859	5.54301e-05	TRUE	non-plaque vs plaque
DOPEY2	7.14774	7.72144	5.54301e-05	TRUE	non-plaque vs plaque
HK3	6.26952	7.07063	5.54301e-05	TRUE	non-plaque vs plaque
RNF130	9.85422	10.2449	5.54301e-05	TRUE	non-plaque vs plaque
GJA1	10.62	9.89049	5.54301e-05	TRUE	non-plaque vs plaque
ARMCX1	8.1234	7.75209	5.54301e-05	TRUE	non-plaque vs plaque
ABHD3	7.13801	7.61222	5.59846e-05	TRUE	non-plaque vs plaque
SHTN1	7.95544	8.46511	5.60038e-05	TRUE	non-plaque vs plaque
VGLL3	8.23425	7.70871	5.62166e-05	TRUE	non-plaque vs plaque
CTPS1	8.81115	8.23832	5.63334e-05	TRUE	non-plaque vs plaque
GUSB	8.67923	9.27488	5.63414e-05	TRUE	non-plaque vs plaque
SOBP	6.86997	6.44982	5.67045e-05	TRUE	non-plaque vs plaque
LURAP1L	8.79766	8.29135	5.67687e-05	TRUE	non-plaque vs plaque
TMEM30B	8.80717	8.14314	5.68538e-05	TRUE	non-plaque vs plaque
SSFA2	9.60945	9.34648	5.68538e-05	TRUE	non-plaque vs plaque
ITGB2	9.44191	10.4151	5.68538e-05	TRUE	non-plaque vs plaque
MCTP1	7.16924	8.09207	5.68538e-05	TRUE	non-plaque vs plaque
CAP2	9.57778	8.70488	5.68538e-05	TRUE	non-plaque vs plaque
DENND4B	6.97792	7.35646	5.68937e-05	TRUE	non-plaque vs plaque
LRRC8D	7.817	8.352	5.69711e-05	TRUE	non-plaque vs plaque
ZNF639	6.99383	6.67057	5.69711e-05	TRUE	non-plaque vs plaque
GALNT6	6.90579	7.57697	5.71051e-05	TRUE	non-plaque vs plaque
PSIP1	8.45029	7.97472	5.71965e-05	TRUE	non-plaque vs plaque
AREL1	8.02761	8.24312	5.72809e-05	TRUE	non-plaque vs plaque
NPC1	9.04474	9.57094	5.73387e-05	TRUE	non-plaque vs plaque
ARHGEF9	8.87174	8.19583	5.73548e-05	TRUE	non-plaque vs plaque
TNFAIP8L2	5.9906	6.39814	5.73667e-05	TRUE	non-plaque vs plaque
PLVAP	7.62601	8.12504	5.73667e-05	TRUE	non-plaque vs plaque
PID1	7.76332	7.25339	5.73667e-05	TRUE	non-plaque vs plaque
ZDHHC15	6.25356	5.8295	5.74199e-05	TRUE	non-plaque vs plaque
DEF6	6.7801	7.10787	5.75175e-05	TRUE	non-plaque vs plaque
DENND1A	7.15433	7.39432	5.75175e-05	TRUE	non-plaque vs plaque
FTL	11.6171	12.1739	5.75976e-05	TRUE	non-plaque vs plaque
MOB3A	8.19761	8.58788	5.75976e-05	TRUE	non-plaque vs plaque
LRRC25	7.51971	8.14754	5.75976e-05	TRUE	non-plaque vs plaque
REL	8.21547	8.67199	5.75976e-05	TRUE	non-plaque vs plaque
SUSD5	9.07617	8.17996	5.75976e-05	TRUE	non-plaque vs plaque
HEPH	9.0024	8.47819	5.75976e-05	TRUE	non-plaque vs plaque
KMO	5.45052	6.57488	5.76391e-05	TRUE	non-plaque vs plaque
ATOH8	6.91027	6.36373	5.76637e-05	TRUE	non-plaque vs plaque
PTAFR	6.56858	6.97031	5.78069e-05	TRUE	non-plaque vs plaque
RRAD	7.11499	6.57088	5.78069e-05	TRUE	non-plaque vs plaque
KCNAB1	7.97332	7.12296	5.86223e-05	TRUE	non-plaque vs plaque
NALCN	7.73724	6.8972	5.90715e-05	TRUE	non-plaque vs plaque
NFIA	9.57282	8.89851	5.93392e-05	TRUE	non-plaque vs plaque
IL2RB	6.13346	6.56356	5.96215e-05	TRUE	non-plaque vs plaque
RAB8A	8.14413	8.39271	5.96498e-05	TRUE	non-plaque vs plaque
RASGRP4	5.7274	6.03004	5.96498e-05	TRUE	non-plaque vs plaque
RNF103	8.11637	7.84174	5.96498e-05	TRUE	non-plaque vs plaque
CLCN5	6.00392	6.26022	5.96498e-05	TRUE	non-plaque vs plaque
LRCH2	7.69381	6.82538	5.96498e-05	TRUE	non-plaque vs plaque
CARMIL1	8.86109	8.35283	6.00098e-05	TRUE	non-plaque vs plaque
PAFAH2	7.12913	7.32867	6.00145e-05	TRUE	non-plaque vs plaque
MSRB3	9.86837	9.22777	6.00145e-05	TRUE	non-plaque vs plaque
CSF2RB	6.8858	7.47899	6.00145e-05	TRUE	non-plaque vs plaque
FGD6	7.59705	8.08217	6.02346e-05	TRUE	non-plaque vs plaque
BRMS1L	7.15414	6.6806	6.02346e-05	TRUE	non-plaque vs plaque
SLC24A3	8.39168	7.77913	6.02346e-05	TRUE	non-plaque vs plaque
GSTK1	8.20563	8.4839	6.02346e-05	TRUE	non-plaque vs plaque
TMEM120A	7.48827	7.28265	6.02346e-05	TRUE	non-plaque vs plaque
STK17A	8.95199	8.7027	6.03083e-05	TRUE	non-plaque vs plaque
VSIG4	8.98829	9.79715	6.03825e-05	TRUE	non-plaque vs plaque
C3orf70	6.63396	6.13031	6.06172e-05	TRUE	non-plaque vs plaque
SLC8B1	7.51023	7.98682	6.06425e-05	TRUE	non-plaque vs plaque
DHRS9	5.5463	6.32805	6.06425e-05	TRUE	non-plaque vs plaque
FAM49A	7.74271	8.27893	6.06425e-05	TRUE	non-plaque vs plaque
BAMBI	7.81263	7.06352	6.07251e-05	TRUE	non-plaque vs plaque
PECAM1	7.00941	7.65877	6.07251e-05	TRUE	non-plaque vs plaque
CD37	8.0563	8.72125	6.07251e-05	TRUE	non-plaque vs plaque
JPH2	7.55138	6.97697	6.07251e-05	TRUE	non-plaque vs plaque
RREB1	7.50706	7.81622	6.07251e-05	TRUE	non-plaque vs plaque
RWDD2A	6.94719	6.60519	6.07251e-05	TRUE	non-plaque vs plaque
PIK3CG	7.88144	8.605	6.07251e-05	TRUE	non-plaque vs plaque
SMARCA1	9.59256	9.05955	6.07251e-05	TRUE	non-plaque vs plaque
SCN3A	5.16426	4.51875	6.08278e-05	TRUE	non-plaque vs plaque
SLC37A1	6.13883	6.37578	6.08278e-05	TRUE	non-plaque vs plaque
MFNG	6.40052	6.97406	6.08278e-05	TRUE	non-plaque vs plaque
SLAIN2	10.1522	9.90531	6.08278e-05	TRUE	non-plaque vs plaque
SERPINB9	7.45778	7.87105	6.08278e-05	TRUE	non-plaque vs plaque
PTK2	9.75763	9.30255	6.08278e-05	TRUE	non-plaque vs plaque
TMEM37	7.67667	8.15762	6.11361e-05	TRUE	non-plaque vs plaque
BID	6.95787	7.3714	6.16986e-05	TRUE	non-plaque vs plaque
AIM1	7.70334	8.39751	6.1751e-05	TRUE	non-plaque vs plaque
OSTF1	9.06884	9.54761	6.184e-05	TRUE	non-plaque vs plaque
TSPAN13	5.86705	6.61147	6.20478e-05	TRUE	non-plaque vs plaque
GALC	8.62904	9.16748	6.24328e-05	TRUE	non-plaque vs plaque
DTNB	7.12967	7.38166	6.24328e-05	TRUE	non-plaque vs plaque
FGFR1	8.39637	7.99549	6.24328e-05	TRUE	non-plaque vs plaque
CDKL5	7.38012	6.78897	6.25859e-05	TRUE	non-plaque vs plaque
ZNF441	6.85376	6.4565	6.31455e-05	TRUE	non-plaque vs plaque
MADD	7.8102	8.2256	6.33355e-05	TRUE	non-plaque vs plaque
STON2	4.15946	4.48827	6.33355e-05	TRUE	non-plaque vs plaque
TBX18	8.59562	7.94319	6.34072e-05	TRUE	non-plaque vs plaque
TPST2	7.8786	8.26585	6.35303e-05	TRUE	non-plaque vs plaque
TOR1AIP1	10.0757	9.77777	6.36544e-05	TRUE	non-plaque vs plaque
MTMR14	8.05084	8.47916	6.37345e-05	TRUE	non-plaque vs plaque
F10	6.66267	6.33548	6.38205e-05	TRUE	non-plaque vs plaque
EMP2	9.87688	9.40967	6.42725e-05	TRUE	non-plaque vs plaque
SLC16A5	6.41347	6.691	6.42725e-05	TRUE	non-plaque vs plaque
CTSC	9.45598	10.212	6.43e-05	TRUE	non-plaque vs plaque
DRAM1	8.76413	9.40971	6.43e-05	TRUE	non-plaque vs plaque
DOK1	6.64952	6.96736	6.43e-05	TRUE	non-plaque vs plaque
SIRPA	8.36885	8.92091	6.43e-05	TRUE	non-plaque vs plaque
SLC2A9	6.93324	7.41069	6.43e-05	TRUE	non-plaque vs plaque
ZNF204P	7.02651	6.09478	6.43e-05	TRUE	non-plaque vs plaque
PLS3	11.6955	11.0672	6.43e-05	TRUE	non-plaque vs plaque
LGMN	11.1049	11.7625	6.48772e-05	TRUE	non-plaque vs plaque
ATRNL1	8.96588	7.52839	6.53597e-05	TRUE	non-plaque vs plaque
GSR	8.93461	9.30698	6.59817e-05	TRUE	non-plaque vs plaque
HCK	8.42672	9.2145	6.60508e-05	TRUE	non-plaque vs plaque
NLRC5	6.44145	6.82017	6.6162e-05	TRUE	non-plaque vs plaque
SAMD9L	7.99699	8.514	6.64201e-05	TRUE	non-plaque vs plaque
TRPC4	6.06049	5.39217	6.66512e-05	TRUE	non-plaque vs plaque
IL2RG	7.58672	8.50071	6.66512e-05	TRUE	non-plaque vs plaque
UCP2	8.33294	9.14104	6.67303e-05	TRUE	non-plaque vs plaque
STARD7	9.43862	9.70529	6.67303e-05	TRUE	non-plaque vs plaque
FAM49B	8.44153	9.09879	6.67303e-05	TRUE	non-plaque vs plaque
TBC1D2	7.08028	7.72465	6.67303e-05	TRUE	non-plaque vs plaque
CYBB	10.4074	11.15	6.67303e-05	TRUE	non-plaque vs plaque
TSPAN14	8.10986	8.66709	6.67903e-05	TRUE	non-plaque vs plaque
SGCA	7.53469	7.05907	6.71195e-05	TRUE	non-plaque vs plaque
TSPAN33	7.24151	7.81236	6.77502e-05	TRUE	non-plaque vs plaque
CARD11	5.75339	6.10149	6.78156e-05	TRUE	non-plaque vs plaque
RRAGA	7.54979	7.32675	6.78156e-05	TRUE	non-plaque vs plaque
TNFSF8	7.27136	7.95954	6.78156e-05	TRUE	non-plaque vs plaque
LDB3	6.85087	6.15152	6.78382e-05	TRUE	non-plaque vs plaque
KCNAB2	8.00229	8.79866	6.81423e-05	TRUE	non-plaque vs plaque
THRB	8.72791	7.69111	6.81423e-05	TRUE	non-plaque vs plaque
LMNB1	6.36677	6.89824	6.81423e-05	TRUE	non-plaque vs plaque
UBE2J1	8.25866	8.55928	6.81423e-05	TRUE	non-plaque vs plaque
RBBP7	9.76318	9.56059	6.82095e-05	TRUE	non-plaque vs plaque
TCEA3	8.55883	7.93984	6.82421e-05	TRUE	non-plaque vs plaque
C17orf75	7.48591	7.13166	6.82421e-05	TRUE	non-plaque vs plaque
FUCA1	9.14006	9.79897	6.83775e-05	TRUE	non-plaque vs plaque
IPO7	10.357	10.0725	6.83775e-05	TRUE	non-plaque vs plaque
SMAD9	8.07206	7.35955	6.83775e-05	TRUE	non-plaque vs plaque
ADAMTSL3	8.61005	7.77235	6.83775e-05	TRUE	non-plaque vs plaque
KLHL6	7.9754	8.80454	6.83775e-05	TRUE	non-plaque vs plaque
PLN	11.2744	10.2133	6.83775e-05	TRUE	non-plaque vs plaque
NSMF	7.87321	7.37871	6.83775e-05	TRUE	non-plaque vs plaque
MYLK	10.4764	9.85975	6.86099e-05	TRUE	non-plaque vs plaque
HLA-L	6.22596	6.51003	6.86099e-05	TRUE	non-plaque vs plaque
GPRC5A	7.10915	6.4212	6.87566e-05	TRUE	non-plaque vs plaque
TRDMT1	6.49006	6.10416	6.92809e-05	TRUE	non-plaque vs plaque
CIITA	6.83596	7.19721	6.94797e-05	TRUE	non-plaque vs plaque
SLFN11	8.75264	9.1136	6.94797e-05	TRUE	non-plaque vs plaque
NFKBID	6.20981	6.50751	6.94797e-05	TRUE	non-plaque vs plaque
FOLR2	8.95732	9.71016	6.95007e-05	TRUE	non-plaque vs plaque
FGFR2	5.80528	5.25128	6.95888e-05	TRUE	non-plaque vs plaque
AIF1	8.83144	9.51419	6.96437e-05	TRUE	non-plaque vs plaque
CTSH	8.43332	9.22872	6.98331e-05	TRUE	non-plaque vs plaque
ABCC3	6.96931	7.46917	7.02776e-05	TRUE	non-plaque vs plaque
MALT1	7.06102	7.30894	7.02776e-05	TRUE	non-plaque vs plaque
SH3BP1	6.31404	6.61282	7.02776e-05	TRUE	non-plaque vs plaque
AMER1	6.39488	6.01375	7.02776e-05	TRUE	non-plaque vs plaque
PJA2	11.2398	10.9457	7.04495e-05	TRUE	non-plaque vs plaque
CLN8	6.97671	7.35901	7.04495e-05	TRUE	non-plaque vs plaque
SLAMF6	5.9822	6.8391	7.09171e-05	TRUE	non-plaque vs plaque
DMXL2	8.78084	9.52771	7.09171e-05	TRUE	non-plaque vs plaque
TPM3P9	9.46855	9.87243	7.10589e-05	TRUE	non-plaque vs plaque
SLC15A3	8.55503	9.32936	7.1346e-05	TRUE	non-plaque vs plaque
ATP8B1	9.69386	9.18895	7.14856e-05	TRUE	non-plaque vs plaque
TAGAP	6.66054	7.32358	7.14856e-05	TRUE	non-plaque vs plaque
TNFAIP2	7.37847	8.00811	7.19279e-05	TRUE	non-plaque vs plaque
S100A11	10.4901	10.8424	7.1979e-05	TRUE	non-plaque vs plaque
HEXA	8.96508	9.36635	7.1979e-05	TRUE	non-plaque vs plaque
DSE	9.68734	10.0965	7.24214e-05	TRUE	non-plaque vs plaque
EXT1	9.85165	9.28498	7.25055e-05	TRUE	non-plaque vs plaque
ANP32E	8.64001	8.28004	7.25294e-05	TRUE	non-plaque vs plaque
PARD3	7.30941	6.79948	7.25294e-05	TRUE	non-plaque vs plaque
SIDT1	5.17278	5.57172	7.25294e-05	TRUE	non-plaque vs plaque
RBM24	5.776	5.32161	7.25294e-05	TRUE	non-plaque vs plaque
CD300LB	5.76366	6.5767	7.25315e-05	TRUE	non-plaque vs plaque
RNF125	6.22649	6.81142	7.25315e-05	TRUE	non-plaque vs plaque
TSHZ3	6.89934	7.11503	7.25315e-05	TRUE	non-plaque vs plaque
CERS6	8.88642	9.14676	7.25315e-05	TRUE	non-plaque vs plaque
SAMHD1	10.2127	10.8117	7.25315e-05	TRUE	non-plaque vs plaque
MAPKAP1	9.02929	9.21551	7.25315e-05	TRUE	non-plaque vs plaque
ZNF385A	7.40224	8.20404	7.25602e-05	TRUE	non-plaque vs plaque
PGBD5	5.6006	6.07432	7.28788e-05	TRUE	non-plaque vs plaque
PELI1	8.42611	8.72192	7.28788e-05	TRUE	non-plaque vs plaque
RSL24D1	9.56335	9.23847	7.39839e-05	TRUE	non-plaque vs plaque
FBXO33	7.08902	6.88247	7.39992e-05	TRUE	non-plaque vs plaque
COMMD9	6.98873	7.42322	7.40063e-05	TRUE	non-plaque vs plaque
POLR2C	8.07511	7.83287	7.42399e-05	TRUE	non-plaque vs plaque
MAP3K14	6.32541	6.69144	7.42399e-05	TRUE	non-plaque vs plaque
C1QB	9.4524	10.2182	7.45234e-05	TRUE	non-plaque vs plaque
ZBP1	5.6357	5.94511	7.45234e-05	TRUE	non-plaque vs plaque
MMRN1	5.14173	6.29601	7.45234e-05	TRUE	non-plaque vs plaque
CSTB	10.894	11.5058	7.4867e-05	TRUE	non-plaque vs plaque
CYB5R2	6.67571	6.38512	7.49258e-05	TRUE	non-plaque vs plaque
ITGAE	5.42751	5.84606	7.49258e-05	TRUE	non-plaque vs plaque
NCF4	6.61733	7.33441	7.49258e-05	TRUE	non-plaque vs plaque
EOGT	8.96046	8.53053	7.49258e-05	TRUE	non-plaque vs plaque
LOC646903	6.34675	5.80554	7.52269e-05	TRUE	non-plaque vs plaque
GPX1	9.18395	9.63318	7.54589e-05	TRUE	non-plaque vs plaque
CLEC1A	4.97312	5.44453	7.55831e-05	TRUE	non-plaque vs plaque
CPE	10.4693	9.89295	7.57709e-05	TRUE	non-plaque vs plaque
SACS	8.47281	7.87581	7.59012e-05	TRUE	non-plaque vs plaque
PLD3	9.85462	10.4646	7.59012e-05	TRUE	non-plaque vs plaque
MAPKAPK3	7.4977	7.98688	7.59012e-05	TRUE	non-plaque vs plaque
MICB	7.25923	7.49601	7.59012e-05	TRUE	non-plaque vs plaque
TFEC	7.06808	8.05168	7.59012e-05	TRUE	non-plaque vs plaque
PLCE1	8.33954	7.48021	7.59105e-05	TRUE	non-plaque vs plaque
PDK3	8.51094	8.06332	7.60086e-05	TRUE	non-plaque vs plaque
NLRC4	6.20698	7.12984	7.60514e-05	TRUE	non-plaque vs plaque
COQ7	7.46506	7.19788	7.65995e-05	TRUE	non-plaque vs plaque
CAMK2G	8.61082	8.04511	7.70111e-05	TRUE	non-plaque vs plaque
ARRB1	7.97264	8.71082	7.70111e-05	TRUE	non-plaque vs plaque
TET3	6.22416	6.66028	7.70263e-05	TRUE	non-plaque vs plaque
SNX5	7.5962	7.82286	7.70263e-05	TRUE	non-plaque vs plaque
HEY2	8.95486	8.04584	7.70263e-05	TRUE	non-plaque vs plaque
TYRP1	4.78057	4.44011	7.70263e-05	TRUE	non-plaque vs plaque
FCER1G	9.37202	10.2905	7.74704e-05	TRUE	non-plaque vs plaque
SH2B3	7.73796	8.15279	7.78408e-05	TRUE	non-plaque vs plaque
ITPR2	8.77979	9.18027	7.78408e-05	TRUE	non-plaque vs plaque
ATP6V0D1	8.74892	9.24532	7.78408e-05	TRUE	non-plaque vs plaque
NSF	8.59641	8.94813	7.78408e-05	TRUE	non-plaque vs plaque
PTBP3	9.00665	9.35925	7.78408e-05	TRUE	non-plaque vs plaque
RNF180	8.89161	8.15452	7.78445e-05	TRUE	non-plaque vs plaque
MYO7A	6.27709	6.5171	7.8285e-05	TRUE	non-plaque vs plaque
ATP6V0B	8.12923	8.60414	7.83075e-05	TRUE	non-plaque vs plaque
HDGFRP3	8.96934	8.61606	7.87422e-05	TRUE	non-plaque vs plaque
DAPP1	5.60901	6.38554	7.87997e-05	TRUE	non-plaque vs plaque
CD52	7.79627	9.05946	7.88559e-05	TRUE	non-plaque vs plaque
KATNAL1	8.18153	7.80538	7.88559e-05	TRUE	non-plaque vs plaque
MYO1B	9.28212	8.88715	7.89578e-05	TRUE	non-plaque vs plaque
DENND2D	7.87976	8.5894	7.93021e-05	TRUE	non-plaque vs plaque
INPP4A	8.08434	8.30167	7.93021e-05	TRUE	non-plaque vs plaque
IFNAR2	8.33886	8.79299	7.93021e-05	TRUE	non-plaque vs plaque
SGCD	8.52283	7.75727	7.93021e-05	TRUE	non-plaque vs plaque
KDM2A	7.96942	8.20092	8.00259e-05	TRUE	non-plaque vs plaque
SLC43A2	7.18003	7.61429	8.05531e-05	TRUE	non-plaque vs plaque
KDELC2	9.32121	8.92217	8.0901e-05	TRUE	non-plaque vs plaque
CPED1	10.0864	9.31736	8.1102e-05	TRUE	non-plaque vs plaque
POLR2M	9.7722	9.37819	8.13925e-05	TRUE	non-plaque vs plaque
GREB1L	5.58669	4.96485	8.14245e-05	TRUE	non-plaque vs plaque
PEG10	5.58357	5.14636	8.14245e-05	TRUE	non-plaque vs plaque
LCORL	6.31331	6.61735	8.14844e-05	TRUE	non-plaque vs plaque
AKIRIN2	7.94754	8.27423	8.14844e-05	TRUE	non-plaque vs plaque
TRIM36	6.52902	5.92371	8.16518e-05	TRUE	non-plaque vs plaque
SFXN2	5.84907	6.18787	8.17278e-05	TRUE	non-plaque vs plaque
TAP1	7.85317	8.31451	8.17278e-05	TRUE	non-plaque vs plaque
FAM126A	9.38977	8.98038	8.18281e-05	TRUE	non-plaque vs plaque
BCL2L11	5.83759	6.26559	8.18641e-05	TRUE	non-plaque vs plaque
HSPA4	9.27868	9.09412	8.19057e-05	TRUE	non-plaque vs plaque
TRIB1	7.41994	7.90072	8.19057e-05	TRUE	non-plaque vs plaque
TLL1	5.01694	5.61573	8.20359e-05	TRUE	non-plaque vs plaque
ARAP2	6.37568	7.15985	8.20359e-05	TRUE	non-plaque vs plaque
ARHGEF12	9.7014	9.32676	8.20739e-05	TRUE	non-plaque vs plaque
CDCP1	6.96311	7.59195	8.2156e-05	TRUE	non-plaque vs plaque
DEPTOR	7.59559	8.35582	8.2156e-05	TRUE	non-plaque vs plaque
TMEM140	7.63638	8.02455	8.22336e-05	TRUE	non-plaque vs plaque
SEMA6A	5.10123	5.60994	8.22809e-05	TRUE	non-plaque vs plaque
ZNRF3	6.94293	6.56788	8.25906e-05	TRUE	non-plaque vs plaque
CNN3	9.85989	9.53502	8.27378e-05	TRUE	non-plaque vs plaque
PRKG1	10.2799	9.44116	8.27378e-05	TRUE	non-plaque vs plaque
CHST15	7.71678	8.19174	8.27378e-05	TRUE	non-plaque vs plaque
ACAD10	6.01542	6.21493	8.27378e-05	TRUE	non-plaque vs plaque
ARHGAP9	6.58122	6.94951	8.27378e-05	TRUE	non-plaque vs plaque
KANSL1L	7.65304	7.15259	8.27378e-05	TRUE	non-plaque vs plaque
IFNGR2	8.67404	9.015	8.27378e-05	TRUE	non-plaque vs plaque
B3GNT5	6.5383	7.32277	8.27378e-05	TRUE	non-plaque vs plaque
BMP2K	8.62916	9.21621	8.27378e-05	TRUE	non-plaque vs plaque
IRF5	6.6517	7.13594	8.27378e-05	TRUE	non-plaque vs plaque
ZNF483	7.58129	6.86808	8.27378e-05	TRUE	non-plaque vs plaque
POLA2	6.6616	6.8785	8.29969e-05	TRUE	non-plaque vs plaque
FAM20A	6.62339	7.40511	8.31626e-05	TRUE	non-plaque vs plaque
ZAK	8.40283	7.89968	8.34e-05	TRUE	non-plaque vs plaque
PLIN2	8.73142	9.9144	8.34e-05	TRUE	non-plaque vs plaque
PIK3R5	6.94763	7.54104	8.36188e-05	TRUE	non-plaque vs plaque
NAB1	7.71784	7.41174	8.36188e-05	TRUE	non-plaque vs plaque
CSRP1	11.5416	11.0143	8.37576e-05	TRUE	non-plaque vs plaque
LRP6	8.98772	8.36296	8.37576e-05	TRUE	non-plaque vs plaque
AKAP1	8.23544	7.68249	8.37576e-05	TRUE	non-plaque vs plaque
FGF13	7.83627	7.33403	8.37576e-05	TRUE	non-plaque vs plaque
TRPV4	6.70739	7.12017	8.37728e-05	TRUE	non-plaque vs plaque
JAK3	6.27853	6.75706	8.37728e-05	TRUE	non-plaque vs plaque
CD163L1	7.75588	8.61704	8.38916e-05	TRUE	non-plaque vs plaque
RHBDF2	6.13277	6.62977	8.39549e-05	TRUE	non-plaque vs plaque
DDX42	10.0527	9.82574	8.44121e-05	TRUE	non-plaque vs plaque
CTSL	10.4617	11.2417	8.44121e-05	TRUE	non-plaque vs plaque
GIMAP2	7.25117	8.04176	8.45484e-05	TRUE	non-plaque vs plaque
MID2	7.95898	7.55215	8.45484e-05	TRUE	non-plaque vs plaque
CD48	7.43036	8.32725	8.45929e-05	TRUE	non-plaque vs plaque
C5AR1	7.90598	8.7365	8.45929e-05	TRUE	non-plaque vs plaque
MYH11	12.2	11.4476	8.48134e-05	TRUE	non-plaque vs plaque
AKTIP	8.96285	8.4546	8.48134e-05	TRUE	non-plaque vs plaque
EZH2	5.50291	5.99101	8.48134e-05	TRUE	non-plaque vs plaque
SLC9A7	7.17444	7.62345	8.48134e-05	TRUE	non-plaque vs plaque
NEK7	10.4908	10.153	8.48335e-05	TRUE	non-plaque vs plaque
SNORD116-25	7.16603	6.41925	8.48335e-05	TRUE	non-plaque vs plaque
KBTBD3	6.44258	5.91293	8.50536e-05	TRUE	non-plaque vs plaque
PDXK	7.68477	8.08652	8.50536e-05	TRUE	non-plaque vs plaque
NAGA	8.70913	9.17756	8.50536e-05	TRUE	non-plaque vs plaque
TAOK3	8.71531	9.03096	8.53908e-05	TRUE	non-plaque vs plaque
SASH3	6.96553	7.4612	8.54489e-05	TRUE	non-plaque vs plaque
IFIH1	7.28013	7.67929	8.56261e-05	TRUE	non-plaque vs plaque
FES	6.01756	6.3116	8.57239e-05	TRUE	non-plaque vs plaque
COBLL1	8.10969	7.56681	8.57239e-05	TRUE	non-plaque vs plaque
HOMER1	6.24453	5.7794	8.57239e-05	TRUE	non-plaque vs plaque
GAB1	8.24995	7.90437	8.58277e-05	TRUE	non-plaque vs plaque
LILRA6	6.1126	6.67212	8.58389e-05	TRUE	non-plaque vs plaque
EIF4G3	8.60942	8.82119	8.65444e-05	TRUE	non-plaque vs plaque
PARVG	7.41352	8.08442	8.65444e-05	TRUE	non-plaque vs plaque
CRNKL1	8.20044	7.99965	8.65645e-05	TRUE	non-plaque vs plaque
TYMP	8.24113	8.72971	8.65645e-05	TRUE	non-plaque vs plaque
GPR84	6.48996	7.12561	8.71766e-05	TRUE	non-plaque vs plaque
ZNF827	7.35869	6.95308	8.72631e-05	TRUE	non-plaque vs plaque
SAMD4A	8.28414	7.74263	8.76025e-05	TRUE	non-plaque vs plaque
CEP128	6.92793	7.25298	8.76317e-05	TRUE	non-plaque vs plaque
TREM2	6.58937	7.23539	8.84505e-05	TRUE	non-plaque vs plaque
AIM2	5.05858	5.61356	8.8645e-05	TRUE	non-plaque vs plaque
RANBP9	9.70787	9.4528	8.87602e-05	TRUE	non-plaque vs plaque
VCL	10.4926	9.92008	8.89524e-05	TRUE	non-plaque vs plaque
SPI1	7.98155	8.60792	8.89524e-05	TRUE	non-plaque vs plaque
AIFM1	7.60579	7.85581	8.89524e-05	TRUE	non-plaque vs plaque
RAVER2	8.58844	7.81683	8.91625e-05	TRUE	non-plaque vs plaque
SLC20A1	8.36976	8.91298	8.91625e-05	TRUE	non-plaque vs plaque
ACKR4	6.63886	5.9812	8.95105e-05	TRUE	non-plaque vs plaque
DMTN	7.06969	6.57714	8.95105e-05	TRUE	non-plaque vs plaque
RAPGEF1	7.03037	7.46753	8.95105e-05	TRUE	non-plaque vs plaque
CD180	7.15722	8.20559	8.98858e-05	TRUE	non-plaque vs plaque
PARP12	8.23787	8.68101	9.00348e-05	TRUE	non-plaque vs plaque
SLC38A7	6.38886	6.7654	9.01416e-05	TRUE	non-plaque vs plaque
DNAJB4	10.1627	9.45348	9.04524e-05	TRUE	non-plaque vs plaque
IPMK	6.88262	7.31145	9.08004e-05	TRUE	non-plaque vs plaque
SNORD116-14	10.6533	10.1206	9.08004e-05	TRUE	non-plaque vs plaque
AGPAT3	7.00882	7.24944	9.08004e-05	TRUE	non-plaque vs plaque
NAP1L2	7.6659	6.76161	9.08004e-05	TRUE	non-plaque vs plaque
UBE2L6	7.96422	8.19108	9.10047e-05	TRUE	non-plaque vs plaque
TXNDC11	8.21352	8.44891	9.10047e-05	TRUE	non-plaque vs plaque
FBXL7	7.4319	7.0911	9.10752e-05	TRUE	non-plaque vs plaque
FRMD7	5.00973	4.51062	9.12803e-05	TRUE	non-plaque vs plaque
PRF1	6.43363	6.78642	9.16442e-05	TRUE	non-plaque vs plaque
FREM1	7.2837	6.27839	9.16576e-05	TRUE	non-plaque vs plaque
COL13A1	7.17125	6.91733	9.19243e-05	TRUE	non-plaque vs plaque
SYDE2	6.89892	6.10091	9.2172e-05	TRUE	non-plaque vs plaque
RASGRP3	7.22434	8.11306	9.22416e-05	TRUE	non-plaque vs plaque
ANGPTL7	5.24465	4.6378	9.23795e-05	TRUE	non-plaque vs plaque
SLK	9.7685	9.48183	9.23795e-05	TRUE	non-plaque vs plaque
CDH3	4.97121	5.30465	9.23795e-05	TRUE	non-plaque vs plaque
MMD	6.94185	7.53162	9.23795e-05	TRUE	non-plaque vs plaque
NHSL1	5.59909	5.98358	9.23795e-05	TRUE	non-plaque vs plaque
PCYOX1	9.48374	9.09463	9.26978e-05	TRUE	non-plaque vs plaque
MYO3A	3.98157	3.49282	9.27163e-05	TRUE	non-plaque vs plaque
TXNDC15	9.5862	9.30162	9.28388e-05	TRUE	non-plaque vs plaque
TMBIM6	11.3592	11.6174	9.31446e-05	TRUE	non-plaque vs plaque
TOM1L1	7.23849	6.69045	9.31446e-05	TRUE	non-plaque vs plaque
CDH8	5.39357	4.88739	9.32859e-05	TRUE	non-plaque vs plaque
HCFC2	8.60681	8.25589	9.33491e-05	TRUE	non-plaque vs plaque
PAPD5	7.96872	7.67444	9.36397e-05	TRUE	non-plaque vs plaque
TNFRSF1B	7.63933	8.34817	9.38281e-05	TRUE	non-plaque vs plaque
TCEAL4	8.75928	8.3643	9.45811e-05	TRUE	non-plaque vs plaque
MXI1	7.97952	7.69752	9.47902e-05	TRUE	non-plaque vs plaque
CYTIP	8.01093	9.11045	9.5418e-05	TRUE	non-plaque vs plaque
SLCO2A1	6.44705	7.30627	9.5418e-05	TRUE	non-plaque vs plaque
PDE4D	6.52793	6.13493	9.62833e-05	TRUE	non-plaque vs plaque
BTG2	8.40991	8.92733	9.64874e-05	TRUE	non-plaque vs plaque
IFI30	10.7575	11.7542	9.64874e-05	TRUE	non-plaque vs plaque
RGCC	8.33119	9.08009	9.66067e-05	TRUE	non-plaque vs plaque
IFT46	8.38709	8.08172	9.67277e-05	TRUE	non-plaque vs plaque
UBXN11	6.04718	6.45769	9.69077e-05	TRUE	non-plaque vs plaque
CCSAP	6.04107	6.28448	9.71188e-05	TRUE	non-plaque vs plaque
STAC	6.59387	5.80114	9.7499e-05	TRUE	non-plaque vs plaque
KIAA2022	5.80223	5.38027	9.81521e-05	TRUE	non-plaque vs plaque
PCK2	6.78837	7.16305	9.83075e-05	TRUE	non-plaque vs plaque
MCU	8.07275	7.71943	9.87003e-05	TRUE	non-plaque vs plaque
NOV	11.7813	11.0135	9.93754e-05	TRUE	non-plaque vs plaque
SNORD116-24	10.3859	9.80218	9.94656e-05	TRUE	non-plaque vs plaque
AVEN	7.63351	7.34216	9.95302e-05	TRUE	non-plaque vs plaque
LGR6	6.84212	6.17621	9.98645e-05	TRUE	non-plaque vs plaque
MYEF2	8.87616	7.96195	9.98645e-05	TRUE	non-plaque vs plaque
ITGA6	8.01066	8.65641	9.98645e-05	TRUE	non-plaque vs plaque
RNF144B	7.88052	8.4743	9.98645e-05	TRUE	non-plaque vs plaque
PTPN22	6.46188	7.30809	9.99745e-05	TRUE	non-plaque vs plaque
RASAL3	6.22712	6.55951	0.000100107	TRUE	non-plaque vs plaque
TGFA	5.76608	6.11474	0.000100107	TRUE	non-plaque vs plaque
MAFB	8.23588	8.92553	0.000100107	TRUE	non-plaque vs plaque
PCOLCE2	8.55037	8.12021	0.00010024	TRUE	non-plaque vs plaque
IPO5	9.28027	9.07438	0.000100266	TRUE	non-plaque vs plaque
GMIP	6.71331	7.21137	0.000100808	TRUE	non-plaque vs plaque
NEDD4	8.00442	7.42342	0.000100897	TRUE	non-plaque vs plaque
RASSF4	8.071	8.77099	0.000101169	TRUE	non-plaque vs plaque
COL4A3	6.15435	5.8233	0.000101169	TRUE	non-plaque vs plaque
ARHGAP18	8.90811	9.55572	0.000101169	TRUE	non-plaque vs plaque
MTURN	7.96554	7.4103	0.000101169	TRUE	non-plaque vs plaque
PBX1	8.99397	8.4123	0.0001013	TRUE	non-plaque vs plaque
IKBKB	8.10902	8.3175	0.000101638	TRUE	non-plaque vs plaque
RNF11	9.0132	8.6823	0.000102153	TRUE	non-plaque vs plaque
DES	7.56268	7.02658	0.000102537	TRUE	non-plaque vs plaque
TMEM25	7.21204	6.72231	0.000102801	TRUE	non-plaque vs plaque
TMEM119	6.24798	6.65326	0.000103926	TRUE	non-plaque vs plaque
PI4K2A	8.55303	8.97651	0.000104057	TRUE	non-plaque vs plaque
CTTN	9.09629	8.71878	0.000104057	TRUE	non-plaque vs plaque
KCTD1	5.413	5.1226	0.000104057	TRUE	non-plaque vs plaque
ICAM1	7.88844	8.64258	0.000104057	TRUE	non-plaque vs plaque
MTA3	7.08124	6.76401	0.000104057	TRUE	non-plaque vs plaque
MRVI1	9.5035	8.83924	0.000104507	TRUE	non-plaque vs plaque
ACTR10	8.84603	8.61268	0.000104507	TRUE	non-plaque vs plaque
APOBEC3D	6.86549	7.14321	0.000104507	TRUE	non-plaque vs plaque
FANCD2	4.69673	5.07275	0.000104561	TRUE	non-plaque vs plaque
CAV1	9.70902	9.16654	0.000104561	TRUE	non-plaque vs plaque
ZNF217	7.77575	8.15474	0.000104639	TRUE	non-plaque vs plaque
CD86	7.59916	8.48751	0.000104863	TRUE	non-plaque vs plaque
LGR4	7.86059	7.41739	0.000105355	TRUE	non-plaque vs plaque
CNIH3	5.89957	6.59628	0.00010568	TRUE	non-plaque vs plaque
CSF1	8.1697	8.67098	0.000105976	TRUE	non-plaque vs plaque
CD53	10.7117	11.5385	0.000105976	TRUE	non-plaque vs plaque
C12orf75	9.51226	8.83362	0.000105976	TRUE	non-plaque vs plaque
MMP19	7.51158	8.26113	0.000105976	TRUE	non-plaque vs plaque
ASB2	5.94103	5.46147	0.000105976	TRUE	non-plaque vs plaque
ZNF507	8.37697	7.80995	0.000105976	TRUE	non-plaque vs plaque
LANCL1	8.67718	8.22673	0.000105976	TRUE	non-plaque vs plaque
MN1	6.86029	6.5237	0.000105976	TRUE	non-plaque vs plaque
SLC9A9	8.23381	8.7738	0.000105976	TRUE	non-plaque vs plaque
IRF1	6.97609	7.53835	0.000105976	TRUE	non-plaque vs plaque
MZB1	5.75126	6.35043	0.000105976	TRUE	non-plaque vs plaque
ST18	4.38416	4.77275	0.000105976	TRUE	non-plaque vs plaque
SPIN4	7.01768	6.65616	0.000105976	TRUE	non-plaque vs plaque
RHOB	9.45584	9.18435	0.000106191	TRUE	non-plaque vs plaque
CCDC8	7.54902	7.08519	0.000106281	TRUE	non-plaque vs plaque
PBXIP1	8.18416	7.825	0.000106371	TRUE	non-plaque vs plaque
CASP1	7.97462	8.60989	0.000106501	TRUE	non-plaque vs plaque
EMCN	6.10574	7.12126	0.000106501	TRUE	non-plaque vs plaque
TLE1	7.22433	6.7456	0.000106501	TRUE	non-plaque vs plaque
MMP9	8.45503	10.2728	0.00010657	TRUE	non-plaque vs plaque
CC2D2A	7.92178	7.34394	0.00010657	TRUE	non-plaque vs plaque
KCNK17	6.80915	6.27915	0.00010657	TRUE	non-plaque vs plaque
GSAP	7.47359	8.02653	0.00010657	TRUE	non-plaque vs plaque
ATP6V1B2	10.8552	11.3239	0.00010657	TRUE	non-plaque vs plaque
SKAP2	8.31016	9.15217	0.000107007	TRUE	non-plaque vs plaque
PM20D2	8.74109	8.21333	0.000107049	TRUE	non-plaque vs plaque
LILRB2	7.07657	7.70325	0.000107254	TRUE	non-plaque vs plaque
B4GALT1	8.76782	9.05804	0.000107254	TRUE	non-plaque vs plaque
PLA2G15	7.47029	7.99947	0.000107552	TRUE	non-plaque vs plaque
LIPA	10.7144	11.5035	0.000108235	TRUE	non-plaque vs plaque
MYLIP	9.74764	9.0159	0.000108398	TRUE	non-plaque vs plaque
TRBC1	5.60043	5.78062	0.000108544	TRUE	non-plaque vs plaque
FKBP7	7.62728	7.24724	0.000108652	TRUE	non-plaque vs plaque
HTR4	5.5892	5.12343	0.000108652	TRUE	non-plaque vs plaque
H2AFJ	7.2124	6.94374	0.000109	TRUE	non-plaque vs plaque
PSAP	12.3168	12.6857	0.000109063	TRUE	non-plaque vs plaque
GLB1	8.18001	8.55546	0.00010912	TRUE	non-plaque vs plaque
L3MBTL4	6.42619	6.81674	0.00010965	TRUE	non-plaque vs plaque
GMPS	8.96673	8.79865	0.00010965	TRUE	non-plaque vs plaque
CA2	6.39901	7.18956	0.000109779	TRUE	non-plaque vs plaque
OCA2	6.22658	5.74644	0.00010986	TRUE	non-plaque vs plaque
CECR1	8.511	9.31396	0.00010986	TRUE	non-plaque vs plaque
BHLHE40	8.49665	8.96325	0.00010986	TRUE	non-plaque vs plaque
TNFSF10	7.91413	8.7009	0.00010986	TRUE	non-plaque vs plaque
ADGRA3	6.97574	6.40127	0.00010986	TRUE	non-plaque vs plaque
TSPAN12	7.86005	7.34177	0.000109864	TRUE	non-plaque vs plaque
MRGPRF	7.68904	7.09427	0.00011034	TRUE	non-plaque vs plaque
ITGAX	8.168	9.2386	0.00011034	TRUE	non-plaque vs plaque
ARHGAP31	8.53706	8.92279	0.00011034	TRUE	non-plaque vs plaque
C22orf39	7.90805	7.74002	0.00011044	TRUE	non-plaque vs plaque
PRELID2	6.9452	6.59556	0.000110485	TRUE	non-plaque vs plaque
AKAP5	6.00613	5.33985	0.000110593	TRUE	non-plaque vs plaque
SPOP	9.44811	9.11132	0.000111338	TRUE	non-plaque vs plaque
NCSTN	8.40348	8.73504	0.000111599	TRUE	non-plaque vs plaque
TGFB3	8.11115	7.61288	0.000111639	TRUE	non-plaque vs plaque
PALLD	8.76525	8.27938	0.000112111	TRUE	non-plaque vs plaque
ADGRF5	7.33142	8.24839	0.000112143	TRUE	non-plaque vs plaque
RASSF5	7.39008	7.84501	0.000112151	TRUE	non-plaque vs plaque
COL11A1	5.91226	6.53494	0.000112154	TRUE	non-plaque vs plaque
FADS2	8.85733	8.34471	0.000112154	TRUE	non-plaque vs plaque
SLC7A7	7.51413	8.24242	0.000112154	TRUE	non-plaque vs plaque
ADGRG6	6.0589	6.49541	0.000112154	TRUE	non-plaque vs plaque
MECOM	7.56436	7.08301	0.000112338	TRUE	non-plaque vs plaque
LY6E	7.94409	8.45598	0.000113086	TRUE	non-plaque vs plaque
AADAT	6.10199	5.49597	0.000114425	TRUE	non-plaque vs plaque
SEMA3D	7.13608	6.04396	0.000114594	TRUE	non-plaque vs plaque
TBC1D14	9.04137	9.37271	0.000114846	TRUE	non-plaque vs plaque
FAM149A	6.38974	5.8939	0.00011512	TRUE	non-plaque vs plaque
PAPSS2	8.39703	8.856	0.000115367	TRUE	non-plaque vs plaque
EIF5B	9.65072	9.37175	0.000115367	TRUE	non-plaque vs plaque
KHDRBS3	7.92852	7.58419	0.000115421	TRUE	non-plaque vs plaque
TCIRG1	7.51398	8.01792	0.000115575	TRUE	non-plaque vs plaque
CSF2RA	7.07715	7.70537	0.000115951	TRUE	non-plaque vs plaque
ROR1	8.43031	7.79859	0.000116749	TRUE	non-plaque vs plaque
FUCA2	8.4482	8.76656	0.0001168	TRUE	non-plaque vs plaque
FBXO42	8.07911	7.77352	0.000116829	TRUE	non-plaque vs plaque
VAMP4	8.6694	8.30598	0.000116829	TRUE	non-plaque vs plaque
CAT	8.65509	8.94385	0.000116829	TRUE	non-plaque vs plaque
STX11	7.00903	7.4557	0.000116829	TRUE	non-plaque vs plaque
FAM184A	4.87184	4.51135	0.000116829	TRUE	non-plaque vs plaque
SLAMF8	7.86066	8.71762	0.000116834	TRUE	non-plaque vs plaque
GYG1	9.92854	9.61743	0.000116834	TRUE	non-plaque vs plaque
CEP85	5.83734	6.24114	0.00011688	TRUE	non-plaque vs plaque
TBC1D30	5.28346	5.67639	0.00011688	TRUE	non-plaque vs plaque
PARP4	9.28481	9.65503	0.00011688	TRUE	non-plaque vs plaque
CAMSAP2	9.41411	9.03683	0.000117857	TRUE	non-plaque vs plaque
LPP	11.2432	10.7215	0.000118406	TRUE	non-plaque vs plaque
PYGM	7.07931	6.46471	0.000119996	TRUE	non-plaque vs plaque
TRAF3	7.47481	7.88909	0.000120152	TRUE	non-plaque vs plaque
AMIGO2	8.26584	7.63205	0.000120388	TRUE	non-plaque vs plaque
TSPAN8	4.70414	3.86738	0.000120425	TRUE	non-plaque vs plaque
C3orf58	8.63546	8.28532	0.000121014	TRUE	non-plaque vs plaque
LCP1	10.8668	11.7265	0.000121073	TRUE	non-plaque vs plaque
TAF5L	8.03462	7.75915	0.000121253	TRUE	non-plaque vs plaque
LILRB3	7.33254	8.08732	0.000121253	TRUE	non-plaque vs plaque
TFDP2	8.43643	8.04782	0.000121253	TRUE	non-plaque vs plaque
JCHAIN	8.94363	10.8368	0.000121253	TRUE	non-plaque vs plaque
ZSCAN31	5.61291	5.29949	0.000121253	TRUE	non-plaque vs plaque
TNFRSF1A	8.57084	8.79304	0.000121407	TRUE	non-plaque vs plaque
USP53	10.2578	9.85393	0.000121421	TRUE	non-plaque vs plaque
FAM46B	7.1597	6.85802	0.000121591	TRUE	non-plaque vs plaque
CD200R1	5.78299	6.50559	0.000121591	TRUE	non-plaque vs plaque
OCIAD2	6.87908	6.44981	0.000121591	TRUE	non-plaque vs plaque
NLN	6.87468	7.30689	0.000121591	TRUE	non-plaque vs plaque
FLT1	6.47554	7.22743	0.000122203	TRUE	non-plaque vs plaque
RYR3	5.62699	5.09685	0.000122203	TRUE	non-plaque vs plaque
SLC31A2	8.06264	8.69341	0.000122234	TRUE	non-plaque vs plaque
FTH1	9.94295	10.3009	0.000122559	TRUE	non-plaque vs plaque
HSPA1L	5.3427	5.0831	0.000122629	TRUE	non-plaque vs plaque
CCDC3	9.92693	9.2859	0.000123131	TRUE	non-plaque vs plaque
SPG21	9.06204	9.31169	0.000123131	TRUE	non-plaque vs plaque
LIMCH1	8.92152	8.27482	0.000123131	TRUE	non-plaque vs plaque
NPY5R	4.71993	4.21084	0.000123131	TRUE	non-plaque vs plaque
UST	7.97201	7.56508	0.000123131	TRUE	non-plaque vs plaque
MUT	8.08814	7.72719	0.000123131	TRUE	non-plaque vs plaque
MGARP	7.18776	6.64421	0.000123638	TRUE	non-plaque vs plaque
ACTA2	13.1829	12.8245	0.000123686	TRUE	non-plaque vs plaque
TMEM245	9.55451	9.23767	0.000124675	TRUE	non-plaque vs plaque
ATF5	6.3824	6.86389	0.000125035	TRUE	non-plaque vs plaque
OPN3	7.36249	7.93285	0.000125365	TRUE	non-plaque vs plaque
CNOT1	9.81267	9.97573	0.000125545	TRUE	non-plaque vs plaque
PLBD1	9.15832	10.0425	0.000125882	TRUE	non-plaque vs plaque
CASP8	6.49817	6.88229	0.000125882	TRUE	non-plaque vs plaque
GNAI1	7.06263	6.43485	0.000125882	TRUE	non-plaque vs plaque
MPDZ	9.41753	8.82926	0.000125882	TRUE	non-plaque vs plaque
SNX25	9.22091	8.68252	0.000125971	TRUE	non-plaque vs plaque
KIAA0319L	7.84826	8.01228	0.00012636	TRUE	non-plaque vs plaque
NEK6	8.33757	8.81115	0.00012656	TRUE	non-plaque vs plaque
LIMK1	7.75645	8.29381	0.000126688	TRUE	non-plaque vs plaque
SEC23A	10.4935	10.2262	0.000126986	TRUE	non-plaque vs plaque
BLVRB	7.44589	7.86637	0.000127216	TRUE	non-plaque vs plaque
OPTN	9.34696	9.09536	0.000127314	TRUE	non-plaque vs plaque
FAM105A	7.26746	7.87026	0.000127389	TRUE	non-plaque vs plaque
SMOC2	10.6611	10.0567	0.000127389	TRUE	non-plaque vs plaque
SLC2A5	7.38193	8.19821	0.000127719	TRUE	non-plaque vs plaque
RBMS3	9.43988	8.8215	0.000127719	TRUE	non-plaque vs plaque
FYB	6.74601	7.46134	0.000127719	TRUE	non-plaque vs plaque
GBP4	6.92037	7.49463	0.000128012	TRUE	non-plaque vs plaque
CEP70	7.46868	6.99215	0.000128012	TRUE	non-plaque vs plaque
CTSB	12.1111	12.7473	0.000128012	TRUE	non-plaque vs plaque
MPEG1	9.37061	10.1798	0.000128491	TRUE	non-plaque vs plaque
CPEB4	8.70125	8.92793	0.000128989	TRUE	non-plaque vs plaque
NKG7	7.30417	7.66957	0.000129164	TRUE	non-plaque vs plaque
SMAP2	8.6127	9.22748	0.000129712	TRUE	non-plaque vs plaque
ARHGAP26	8.33413	8.73629	0.000130348	TRUE	non-plaque vs plaque
CIDEB	6.19929	6.56978	0.000131002	TRUE	non-plaque vs plaque
TMEM132B	4.89885	4.47155	0.000131057	TRUE	non-plaque vs plaque
BCAM	7.44372	7.00417	0.000131154	TRUE	non-plaque vs plaque
TAF9B	8.46498	8.01273	0.000131154	TRUE	non-plaque vs plaque
DZIP1	7.81974	7.40161	0.000131241	TRUE	non-plaque vs plaque
NEO1	9.19384	8.43178	0.000131241	TRUE	non-plaque vs plaque
SLC5A6	6.40259	6.69141	0.000131241	TRUE	non-plaque vs plaque
AMPH	5.02192	4.50189	0.000131264	TRUE	non-plaque vs plaque
BTBD10	8.74831	8.46613	0.000131873	TRUE	non-plaque vs plaque
RBPMS	9.1278	8.45828	0.000131873	TRUE	non-plaque vs plaque
SNX24	7.15342	7.53841	0.000132322	TRUE	non-plaque vs plaque
TACC2	7.35567	6.80092	0.000132348	TRUE	non-plaque vs plaque
HK2	8.19513	9.10824	0.000132348	TRUE	non-plaque vs plaque
KCNMA1	9.09814	8.53068	0.000132859	TRUE	non-plaque vs plaque
IL18BP	6.63889	6.96187	0.000133007	TRUE	non-plaque vs plaque
CCSER1	4.36699	4.70962	0.000133028	TRUE	non-plaque vs plaque
RASGEF1B	8.08286	8.81392	0.000133028	TRUE	non-plaque vs plaque
DENND1C	6.04243	6.34567	0.000133185	TRUE	non-plaque vs plaque
CFAP36	7.36449	7.11584	0.000133185	TRUE	non-plaque vs plaque
ARL15	6.49704	6.90143	0.000133185	TRUE	non-plaque vs plaque
MKX	7.7959	7.21246	0.000133301	TRUE	non-plaque vs plaque
BEST1	5.40454	5.7535	0.00013352	TRUE	non-plaque vs plaque
DMD	9.61724	8.77355	0.00013354	TRUE	non-plaque vs plaque
PCDH7	9.09035	8.29337	0.000133751	TRUE	non-plaque vs plaque
P2RX7	7.28047	7.99511	0.000133796	TRUE	non-plaque vs plaque
IL16	7.10771	7.41813	0.000133989	TRUE	non-plaque vs plaque
RRAS	9.85753	9.55702	0.000133989	TRUE	non-plaque vs plaque
MAP9	5.30968	4.91512	0.000133989	TRUE	non-plaque vs plaque
RENBP	6.88562	7.45106	0.000133989	TRUE	non-plaque vs plaque
ANO5	6.48986	5.70063	0.000134797	TRUE	non-plaque vs plaque
PTPN3	7.16679	6.51397	0.000134797	TRUE	non-plaque vs plaque
GRAMD3	8.66813	8.21967	0.000135196	TRUE	non-plaque vs plaque
COLGALT1	8.68397	9.14408	0.000135687	TRUE	non-plaque vs plaque
FAM19A2	7.09526	6.10538	0.000135859	TRUE	non-plaque vs plaque
ATP13A2	6.74039	7.07525	0.000135877	TRUE	non-plaque vs plaque
NTRK3	7.80285	7.10897	0.000135932	TRUE	non-plaque vs plaque
MRPS25	7.13306	7.32051	0.000135932	TRUE	non-plaque vs plaque
CDK5RAP2	8.66964	8.30255	0.000135932	TRUE	non-plaque vs plaque
PNPO	7.61489	7.80941	0.000135954	TRUE	non-plaque vs plaque
CDC7	4.69228	5.13222	0.000135979	TRUE	non-plaque vs plaque
MPV17	8.61797	8.85011	0.000136338	TRUE	non-plaque vs plaque
CLMN	6.89842	7.4434	0.000136623	TRUE	non-plaque vs plaque
SHCBP1	5.54465	6.0988	0.000136623	TRUE	non-plaque vs plaque
PSMB10	6.86284	7.20651	0.000136623	TRUE	non-plaque vs plaque
LAMP5	4.5009	4.94553	0.000136623	TRUE	non-plaque vs plaque
SUN1	9.17323	8.73138	0.000136623	TRUE	non-plaque vs plaque
FRS2	8.21669	7.93657	0.000136637	TRUE	non-plaque vs plaque
TIMP4	7.26453	6.93419	0.000136637	TRUE	non-plaque vs plaque
MTMR11	7.76758	7.24171	0.000136725	TRUE	non-plaque vs plaque
ZDBF2	7.43838	6.86623	0.000136768	TRUE	non-plaque vs plaque
ADGRE2	7.0934	7.78643	0.000136883	TRUE	non-plaque vs plaque
AEBP2	9.66456	9.19687	0.000136956	TRUE	non-plaque vs plaque
LPAR5	7.20191	7.45057	0.000137113	TRUE	non-plaque vs plaque
TRPV2	7.25253	7.77111	0.000137113	TRUE	non-plaque vs plaque
EPB41L3	8.15384	8.90831	0.000137113	TRUE	non-plaque vs plaque
EGFR	7.63355	7.08577	0.000137113	TRUE	non-plaque vs plaque
SELE	5.73166	6.88885	0.000137191	TRUE	non-plaque vs plaque
SLC37A2	7.5717	8.3386	0.000137191	TRUE	non-plaque vs plaque
MPPED2	7.59402	6.662	0.000137191	TRUE	non-plaque vs plaque
GREM1	6.6992	7.60256	0.000137191	TRUE	non-plaque vs plaque
EMILIN2	9.0232	9.76406	0.000137191	TRUE	non-plaque vs plaque
PDCD1LG2	7.29263	7.91414	0.000137191	TRUE	non-plaque vs plaque
IK	9.62149	9.38614	0.000138325	TRUE	non-plaque vs plaque
MYD88	7.71035	8.1594	0.00013856	TRUE	non-plaque vs plaque
DPYSL3	9.73133	9.39841	0.00013856	TRUE	non-plaque vs plaque
AP1G2	6.45241	6.8427	0.000138899	TRUE	non-plaque vs plaque
LRRC8B	6.23718	6.65841	0.000139213	TRUE	non-plaque vs plaque
EPHA6	4.11297	3.74963	0.000139217	TRUE	non-plaque vs plaque
WASL	8.83256	8.52122	0.000139217	TRUE	non-plaque vs plaque
SMARCD3	7.34475	6.91419	0.000139339	TRUE	non-plaque vs plaque
CD151	10.4858	10.0516	0.000139741	TRUE	non-plaque vs plaque
LDHB	10.5208	10.2668	0.000139741	TRUE	non-plaque vs plaque
PLK1	5.96357	6.36559	0.000139838	TRUE	non-plaque vs plaque
ZBED4	6.88979	7.13501	0.000139838	TRUE	non-plaque vs plaque
NAP1L5	7.48486	7.10574	0.000139838	TRUE	non-plaque vs plaque
TACC3	6.08952	6.54922	0.000139978	TRUE	non-plaque vs plaque
PPP1CB	11.1934	10.8016	0.000140077	TRUE	non-plaque vs plaque
GAN	7.79787	7.62303	0.000140246	TRUE	non-plaque vs plaque
ZNF672	7.2311	7.40479	0.000140428	TRUE	non-plaque vs plaque
MYH10	12.3787	11.5807	0.000140428	TRUE	non-plaque vs plaque
BLM	4.74463	5.19909	0.000140808	TRUE	non-plaque vs plaque
BRD7	8.6978	8.46395	0.000141356	TRUE	non-plaque vs plaque
MBOAT2	7.03554	6.61122	0.000141438	TRUE	non-plaque vs plaque
IVNS1ABP	9.57277	10.0151	0.000141667	TRUE	non-plaque vs plaque
ALOX5	8.69941	9.44951	0.000141797	TRUE	non-plaque vs plaque
PLAU	8.3981	9.04762	0.000141797	TRUE	non-plaque vs plaque
SLC41A2	9.5623	9.07405	0.000141797	TRUE	non-plaque vs plaque
LRRK1	7.03933	7.38265	0.000141797	TRUE	non-plaque vs plaque
IFNGR1	10.0273	10.4155	0.000141797	TRUE	non-plaque vs plaque
CAPN6	5.30973	4.88674	0.000141797	TRUE	non-plaque vs plaque
ABCC5	7.55631	7.96738	0.000141941	TRUE	non-plaque vs plaque
CYTL1	9.16514	8.48405	0.000142019	TRUE	non-plaque vs plaque
SNORD116-26	6.93047	6.23244	0.000143151	TRUE	non-plaque vs plaque
ARRB2	8.25544	8.99903	0.000143151	TRUE	non-plaque vs plaque
USF1	8.02698	8.24843	0.000143318	TRUE	non-plaque vs plaque
ICA1	5.73314	6.15033	0.000143318	TRUE	non-plaque vs plaque
WDR4	6.38757	6.57424	0.000143341	TRUE	non-plaque vs plaque
FGF1	7.35221	6.7862	0.000143341	TRUE	non-plaque vs plaque
FXYD5	9.05437	9.43731	0.000144687	TRUE	non-plaque vs plaque
LACTB	8.09665	8.50572	0.000144822	TRUE	non-plaque vs plaque
GNB5	7.36815	7.15893	0.000144822	TRUE	non-plaque vs plaque
PKDCC	7.20256	6.8154	0.000144822	TRUE	non-plaque vs plaque
TBC1D8	7.21778	7.62153	0.000144822	TRUE	non-plaque vs plaque
ADGRG2	4.68309	4.38412	0.000145188	TRUE	non-plaque vs plaque
TNFAIP3	7.28886	7.88754	0.000145338	TRUE	non-plaque vs plaque
ZNF304	6.79458	6.50024	0.000145565	TRUE	non-plaque vs plaque
CD93	8.60619	9.07767	0.000145565	TRUE	non-plaque vs plaque
PLXNC1	8.58807	9.36035	0.000145594	TRUE	non-plaque vs plaque
PLPP1	8.60703	8.14926	0.000145594	TRUE	non-plaque vs plaque
CDKN1A	7.80425	8.0897	0.000145594	TRUE	non-plaque vs plaque
LAT2	7.42596	7.82093	0.000145594	TRUE	non-plaque vs plaque
ASPN	11.3024	10.4461	0.000145719	TRUE	non-plaque vs plaque
PCP4	4.93152	4.62058	0.000146602	TRUE	non-plaque vs plaque
C1QTNF7	8.07495	7.08819	0.000146602	TRUE	non-plaque vs plaque
DCUN1D4	8.23465	7.78085	0.000147105	TRUE	non-plaque vs plaque
ATP8B4	8.05465	8.79272	0.00014729	TRUE	non-plaque vs plaque
ABHD12	8.59227	8.96177	0.000147689	TRUE	non-plaque vs plaque
SLC39A8	8.55632	9.30062	0.000147854	TRUE	non-plaque vs plaque
SLC28A3	5.55605	6.68807	0.000147854	TRUE	non-plaque vs plaque
FGR	7.63576	8.4068	0.000148183	TRUE	non-plaque vs plaque
CDC42SE2	9.88267	10.2219	0.000148183	TRUE	non-plaque vs plaque
MAOA	8.29488	7.86461	0.000148183	TRUE	non-plaque vs plaque
BEX5	5.6956	5.19078	0.000148755	TRUE	non-plaque vs plaque
ADAMTS1	9.85366	9.22652	0.000149315	TRUE	non-plaque vs plaque
TRIM45	5.77213	5.55322	0.000149371	TRUE	non-plaque vs plaque
TLN2	7.21814	6.72976	0.000149371	TRUE	non-plaque vs plaque
CCL8	7.06718	8.02804	0.000149371	TRUE	non-plaque vs plaque
ACE	5.84532	6.12715	0.000149371	TRUE	non-plaque vs plaque
MYL6	12.1908	11.9227	0.000149904	TRUE	non-plaque vs plaque
DDAH1	9.38463	8.92828	0.000150823	TRUE	non-plaque vs plaque
MAGEH1	7.88177	7.5836	0.000151732	TRUE	non-plaque vs plaque
TAGLN	12.3715	11.9257	0.000151916	TRUE	non-plaque vs plaque
CCNB1IP1	6.89716	6.4839	0.000151917	TRUE	non-plaque vs plaque
RNF135	7.39914	7.73989	0.000151972	TRUE	non-plaque vs plaque
CLMP	9.44209	9.03182	0.000152109	TRUE	non-plaque vs plaque
SIGLEC7	6.52025	7.01682	0.000152109	TRUE	non-plaque vs plaque
CD36	8.85716	10.6594	0.000153344	TRUE	non-plaque vs plaque
DAG1	7.78135	7.42791	0.000153793	TRUE	non-plaque vs plaque
ADCY9	7.73717	7.23585	0.000153948	TRUE	non-plaque vs plaque
ANXA3	6.47029	5.79431	0.00015397	TRUE	non-plaque vs plaque
MOV10	7.15683	7.39399	0.00015437	TRUE	non-plaque vs plaque
IL21R	5.71179	6.06583	0.000154422	TRUE	non-plaque vs plaque
MFGE8	11.7122	11.3018	0.000154648	TRUE	non-plaque vs plaque
NDST2	7.88842	8.14381	0.000154687	TRUE	non-plaque vs plaque
DACT3	8.14835	7.8744	0.000154717	TRUE	non-plaque vs plaque
TBL1X	7.96534	7.42267	0.000154873	TRUE	non-plaque vs plaque
TRERF1	6.71842	7.13975	0.000155029	TRUE	non-plaque vs plaque
FCMR	5.52845	6.0932	0.0001555	TRUE	non-plaque vs plaque
SNCAIP	7.00016	6.47805	0.000155581	TRUE	non-plaque vs plaque
CNPY4	7.01936	6.72454	0.000155581	TRUE	non-plaque vs plaque
TMEM123	10.1891	10.4235	0.000155713	TRUE	non-plaque vs plaque
LAPTM5	11.451	12.2314	0.000156261	TRUE	non-plaque vs plaque
SNORD116-6	6.93427	6.1933	0.000156261	TRUE	non-plaque vs plaque
LY86	8.2703	9.13733	0.000156773	TRUE	non-plaque vs plaque
FAM26E	9.54555	8.8507	0.000157112	TRUE	non-plaque vs plaque
SPARC	12.765	12.5231	0.000157853	TRUE	non-plaque vs plaque
KDM2B	6.81557	7.05788	0.000158239	TRUE	non-plaque vs plaque
KIF13A	9.66023	9.24096	0.000158239	TRUE	non-plaque vs plaque
SOAT1	8.86326	9.42464	0.000158665	TRUE	non-plaque vs plaque
RCSD1	7.51613	7.85243	0.000159143	TRUE	non-plaque vs plaque
CCDC107	8.15298	7.9032	0.000159211	TRUE	non-plaque vs plaque
KCNS3	7.31741	6.86956	0.000159234	TRUE	non-plaque vs plaque
SLC25A13	7.7181	7.99629	0.000159881	TRUE	non-plaque vs plaque
CD83	8.02836	8.6876	0.00016067	TRUE	non-plaque vs plaque
IGSF21	7.0403	7.45998	0.0001607	TRUE	non-plaque vs plaque
FRMD6	8.27985	7.8838	0.0001607	TRUE	non-plaque vs plaque
FBXL22	6.07492	5.78303	0.0001607	TRUE	non-plaque vs plaque
LILRB4	8.24	9.18819	0.000160726	TRUE	non-plaque vs plaque
PPP1R3C	10.7896	9.97799	0.000160814	TRUE	non-plaque vs plaque
ETV1	6.90883	6.44046	0.000160902	TRUE	non-plaque vs plaque
TMX4	9.29185	9.02752	0.000161468	TRUE	non-plaque vs plaque
SCARA3	8.34022	7.60837	0.000161546	TRUE	non-plaque vs plaque
SLAMF7	6.46732	7.41182	0.000161574	TRUE	non-plaque vs plaque
PLEKHH2	7.36895	6.54401	0.000161913	TRUE	non-plaque vs plaque
CD14	10.3134	11.1497	0.000162096	TRUE	non-plaque vs plaque
POU2AF1	6.31187	6.59663	0.000162138	TRUE	non-plaque vs plaque
PDE5A	11.162	10.4189	0.000162138	TRUE	non-plaque vs plaque
ACTC1	9.29318	8.2208	0.000162795	TRUE	non-plaque vs plaque
PPIF	7.1412	7.6937	0.000163188	TRUE	non-plaque vs plaque
TMSB10	10.8492	11.3386	0.000163209	TRUE	non-plaque vs plaque
PABPC5	5.75369	5.32777	0.000163855	TRUE	non-plaque vs plaque
IRF4	6.18466	6.80204	0.000163872	TRUE	non-plaque vs plaque
CSK	7.77785	8.23601	0.000164045	TRUE	non-plaque vs plaque
THSD7B	5.51968	4.95671	0.000164125	TRUE	non-plaque vs plaque
MIER3	7.87574	7.59653	0.000164125	TRUE	non-plaque vs plaque
ITM2C	8.3416	7.83111	0.000165441	TRUE	non-plaque vs plaque
CBX1	8.07605	7.87487	0.000165588	TRUE	non-plaque vs plaque
TMEM268	6.75182	7.0728	0.000165588	TRUE	non-plaque vs plaque
PRR13	8.70375	8.99892	0.000166428	TRUE	non-plaque vs plaque
SNORD116-23	7.02218	6.43774	0.000166484	TRUE	non-plaque vs plaque
PRPF4	8.28457	8.44573	0.000166695	TRUE	non-plaque vs plaque
KPNA2	8.46326	8.94589	0.000166828	TRUE	non-plaque vs plaque
SELL	6.63676	7.24055	0.000167068	TRUE	non-plaque vs plaque
RECK	8.80522	8.45156	0.000167335	TRUE	non-plaque vs plaque
MOCS2	8.31461	7.9684	0.00016797	TRUE	non-plaque vs plaque
SGK223	6.56649	6.84081	0.00016825	TRUE	non-plaque vs plaque
FCRLA	4.94113	5.44224	0.000168263	TRUE	non-plaque vs plaque
PCDHB15	6.96827	6.31844	0.000168263	TRUE	non-plaque vs plaque
LCA5	6.80778	6.27534	0.000168263	TRUE	non-plaque vs plaque
MYO18B	6.57716	6.06672	0.000168269	TRUE	non-plaque vs plaque
FAM198B	10.206	9.84314	0.000168759	TRUE	non-plaque vs plaque
BDNF	4.98195	4.33293	0.000169173	TRUE	non-plaque vs plaque
PCDHB14	7.40709	6.83806	0.000170351	TRUE	non-plaque vs plaque
GIMAP4	7.67088	8.42352	0.000170876	TRUE	non-plaque vs plaque
CLN3	7.17383	7.40085	0.000171164	TRUE	non-plaque vs plaque
HPCAL1	7.28247	7.64449	0.000171164	TRUE	non-plaque vs plaque
PFKM	8.23342	7.82763	0.000171263	TRUE	non-plaque vs plaque
GRIA1	8.20398	7.17836	0.000171274	TRUE	non-plaque vs plaque
APOBEC3C	7.84919	8.14101	0.000171784	TRUE	non-plaque vs plaque
ETAA1	7.30219	6.90144	0.000171917	TRUE	non-plaque vs plaque
GARNL3	7.54318	7.07285	0.000172077	TRUE	non-plaque vs plaque
GIMAP6	7.23301	7.89916	0.000172198	TRUE	non-plaque vs plaque
PPM1B	8.28832	8.02515	0.000172399	TRUE	non-plaque vs plaque
BRD7P3	3.89873	3.76583	0.000172399	TRUE	non-plaque vs plaque
AOAH	8.488	9.36457	0.000172399	TRUE	non-plaque vs plaque
KRT8	9.09061	8.57303	0.000172971	TRUE	non-plaque vs plaque
PCDHB16	8.37301	7.68807	0.000172971	TRUE	non-plaque vs plaque
GOLGA2	8.445	8.17598	0.000173515	TRUE	non-plaque vs plaque
SSH2	7.07208	7.52807	0.000173528	TRUE	non-plaque vs plaque
CPXM2	10.032	9.53639	0.00017554	TRUE	non-plaque vs plaque
MRC1	9.3258	10.1856	0.000175612	TRUE	non-plaque vs plaque
NEU3	6.80116	7.05143	0.000175612	TRUE	non-plaque vs plaque
NTN4	9.19276	8.77195	0.000175612	TRUE	non-plaque vs plaque
SNORD116-21	8.52013	7.42153	0.000175612	TRUE	non-plaque vs plaque
PROS1	10.086	9.53653	0.000175612	TRUE	non-plaque vs plaque
GLA	7.20664	7.8174	0.000175612	TRUE	non-plaque vs plaque
SFRP1	7.72318	6.75762	0.000175749	TRUE	non-plaque vs plaque
ITGA8	12.3461	11.6699	0.000176652	TRUE	non-plaque vs plaque
CRIM1	11.5972	10.9959	0.000176652	TRUE	non-plaque vs plaque
NSUN7	6.10363	5.52652	0.000176702	TRUE	non-plaque vs plaque
GID4	7.26675	7.06481	0.000176711	TRUE	non-plaque vs plaque
KIAA0319	4.73756	5.06439	0.000177093	TRUE	non-plaque vs plaque
SLC22A23	6.05096	6.3381	0.000177317	TRUE	non-plaque vs plaque
CSDE1	12.1121	11.9205	0.00017746	TRUE	non-plaque vs plaque
CYP2U1	7.22238	6.87504	0.000177926	TRUE	non-plaque vs plaque
PACSIN3	7.08783	6.73498	0.000178024	TRUE	non-plaque vs plaque
PLA2G7	8.60388	9.90344	0.000179179	TRUE	non-plaque vs plaque
RASSF9	5.9674	5.38591	0.000179198	TRUE	non-plaque vs plaque
COPZ2	9.58247	9.29412	0.000179608	TRUE	non-plaque vs plaque
PTGER4	7.76737	8.28755	0.000179882	TRUE	non-plaque vs plaque
NCF2	9.30277	10.1721	0.00018119	TRUE	non-plaque vs plaque
ACER3	7.22414	7.7187	0.00018119	TRUE	non-plaque vs plaque
TNFSF13B	7.27293	7.89693	0.00018119	TRUE	non-plaque vs plaque
NRXN3	6.07533	5.47907	0.00018119	TRUE	non-plaque vs plaque
TOMM70	8.62615	8.38402	0.00018119	TRUE	non-plaque vs plaque
FBXO25	8.21349	8.07669	0.00018119	TRUE	non-plaque vs plaque
PLXND1	8.25527	8.85396	0.000181225	TRUE	non-plaque vs plaque
CCDC110	4.51999	4.13731	0.000181225	TRUE	non-plaque vs plaque
ARSB	8.25241	8.56095	0.000181225	TRUE	non-plaque vs plaque
ADAM8	6.98037	7.62366	0.000182092	TRUE	non-plaque vs plaque
HEXIM1	8.92265	8.46331	0.000182216	TRUE	non-plaque vs plaque
ETV5	8.01155	8.37434	0.000182216	TRUE	non-plaque vs plaque
DDX41	8.60485	8.77248	0.000182216	TRUE	non-plaque vs plaque
GRB14	4.5627	4.23041	0.000182228	TRUE	non-plaque vs plaque
CASS4	5.51678	5.88535	0.000182286	TRUE	non-plaque vs plaque
NPR2	7.79592	7.36001	0.000183157	TRUE	non-plaque vs plaque
PCDHB5	7.27695	6.61048	0.000183232	TRUE	non-plaque vs plaque
NTM	5.90557	6.28518	0.000183294	TRUE	non-plaque vs plaque
SELPLG	7.24619	7.91025	0.000183728	TRUE	non-plaque vs plaque
PREPL	9.8785	9.41499	0.000185378	TRUE	non-plaque vs plaque
HYKK	5.9258	5.60106	0.000185493	TRUE	non-plaque vs plaque
TMEM38A	6.05287	5.82835	0.000185493	TRUE	non-plaque vs plaque
RBM27	8.92324	8.61937	0.000185493	TRUE	non-plaque vs plaque
PTK2B	7.498	7.91567	0.000185493	TRUE	non-plaque vs plaque
C11orf96	8.40597	7.96774	0.000185502	TRUE	non-plaque vs plaque
DLGAP1	6.12271	5.80403	0.000185555	TRUE	non-plaque vs plaque
FCHO1	5.89169	6.13464	0.000186037	TRUE	non-plaque vs plaque
ERBB2	7.75837	7.23443	0.00018681	TRUE	non-plaque vs plaque
SRF	8.77698	8.46052	0.000186872	TRUE	non-plaque vs plaque
OASL	5.8629	6.15124	0.000186917	TRUE	non-plaque vs plaque
GPR183	6.51822	7.4474	0.000186917	TRUE	non-plaque vs plaque
SATB2	7.58582	7.26268	0.000187221	TRUE	non-plaque vs plaque
ACTN4	11.6309	11.1883	0.000188021	TRUE	non-plaque vs plaque
CWC27	7.96444	7.7105	0.000188535	TRUE	non-plaque vs plaque
NDFIP1	9.03933	8.86385	0.000188535	TRUE	non-plaque vs plaque
EFHD2	7.99467	8.59668	0.000188575	TRUE	non-plaque vs plaque
ETNK2	6.66849	6.15204	0.000188939	TRUE	non-plaque vs plaque
SDCBP	10.6904	11.1212	0.000188939	TRUE	non-plaque vs plaque
SORT1	11.1954	10.852	0.000189168	TRUE	non-plaque vs plaque
TJP1	9.58855	9.12724	0.000189168	TRUE	non-plaque vs plaque
SLC29A3	7.3239	7.8461	0.00019014	TRUE	non-plaque vs plaque
TMEM176B	7.82513	8.42356	0.00019014	TRUE	non-plaque vs plaque
TNFAIP8	6.68597	7.06324	0.00019034	TRUE	non-plaque vs plaque
NAPEPLD	7.43371	6.93902	0.000190959	TRUE	non-plaque vs plaque
BCAP29	8.09245	7.75655	0.00019099	TRUE	non-plaque vs plaque
CMTM3	8.10438	8.4496	0.000192864	TRUE	non-plaque vs plaque
PPARGC1B	6.24393	6.54485	0.000192964	TRUE	non-plaque vs plaque
FAT3	6.3014	5.56425	0.000193291	TRUE	non-plaque vs plaque
TMEM51	6.64464	7.15697	0.000193545	TRUE	non-plaque vs plaque
GIMAP8	7.01272	7.66112	0.000194005	TRUE	non-plaque vs plaque
DOK2	7.2909	7.92529	0.000194005	TRUE	non-plaque vs plaque
ATP9A	8.74306	8.1876	0.000194156	TRUE	non-plaque vs plaque
ATXN10	8.9157	8.73828	0.000194389	TRUE	non-plaque vs plaque
PJA1	7.30085	7.08112	0.000194492	TRUE	non-plaque vs plaque
GPR137B	9.59532	10.1401	0.000194687	TRUE	non-plaque vs plaque
SPEG	7.50997	6.96944	0.000195105	TRUE	non-plaque vs plaque
TMEM107	6.60417	6.81245	0.0001952	TRUE	non-plaque vs plaque
LYSMD1	5.81745	5.5013	0.000195236	TRUE	non-plaque vs plaque
SGK1	7.41604	8.23983	0.000195244	TRUE	non-plaque vs plaque
ZFAND1	9.15541	8.7223	0.000195639	TRUE	non-plaque vs plaque
GPR141	6.65348	7.30208	0.000197063	TRUE	non-plaque vs plaque
CALD1	12.0555	11.5181	0.000198334	TRUE	non-plaque vs plaque
REP15	4.63993	4.17107	0.000198354	TRUE	non-plaque vs plaque
GM2A	10.421	11.0845	0.000198514	TRUE	non-plaque vs plaque
HSF2	7.14931	6.88207	0.000198846	TRUE	non-plaque vs plaque
HERPUD1	9.94346	10.1711	0.00019949	TRUE	non-plaque vs plaque
DDR2	9.78586	9.29742	0.000199599	TRUE	non-plaque vs plaque
ARHGAP4	7.08809	7.63841	0.000199599	TRUE	non-plaque vs plaque
TMEM179B	8.11549	8.33358	0.000199903	TRUE	non-plaque vs plaque
NR1H3	6.88692	7.65319	0.000200533	TRUE	non-plaque vs plaque
RBPMS2	6.69178	6.40665	0.000200533	TRUE	non-plaque vs plaque
KYNU	6.92605	7.97327	0.000200533	TRUE	non-plaque vs plaque
ATRN	8.8606	9.02547	0.000200533	TRUE	non-plaque vs plaque
UBE2H	10.0583	9.68803	0.000200533	TRUE	non-plaque vs plaque
SNORD116-13	4.0762	3.49245	0.00020093	TRUE	non-plaque vs plaque
ADGRL3	7.77721	6.71039	0.00020093	TRUE	non-plaque vs plaque
ANKRD7	3.00369	2.83742	0.00020093	TRUE	non-plaque vs plaque
RFTN2	8.90079	8.33369	0.000201375	TRUE	non-plaque vs plaque
ZNF420	7.5036	7.18351	0.000201924	TRUE	non-plaque vs plaque
CFAP97	9.15658	8.88194	0.000202306	TRUE	non-plaque vs plaque
HORMAD1	4.28027	4.85458	0.000202722	TRUE	non-plaque vs plaque
MGAT5	8.51723	8.80626	0.000202957	TRUE	non-plaque vs plaque
CTSD	11.4858	12.041	0.000204112	TRUE	non-plaque vs plaque
SAV1	9.08926	8.76259	0.000205513	TRUE	non-plaque vs plaque
AIMP1	7.3541	7.11583	0.000205513	TRUE	non-plaque vs plaque
SEMA3A	5.69618	6.36655	0.000205513	TRUE	non-plaque vs plaque
HMCN1	10.6953	9.94782	0.00020586	TRUE	non-plaque vs plaque
PRR5L	6.81696	7.29484	0.00020586	TRUE	non-plaque vs plaque
SNX10	7.40266	8.39447	0.000206119	TRUE	non-plaque vs plaque
TEC	6.98056	7.32599	0.00020676	TRUE	non-plaque vs plaque
TMEM35A	6.19959	5.8443	0.00020676	TRUE	non-plaque vs plaque
BMPR1B	7.06165	6.38219	0.000207546	TRUE	non-plaque vs plaque
ZHX3	7.2574	6.87855	0.000207825	TRUE	non-plaque vs plaque
LINC00312	7.80903	6.88437	0.000207825	TRUE	non-plaque vs plaque
ALDH3B1	7.97965	8.21951	0.000208832	TRUE	non-plaque vs plaque
STAC3	6.39075	6.76804	0.000208832	TRUE	non-plaque vs plaque
PAWR	8.70741	8.19067	0.000208832	TRUE	non-plaque vs plaque
KTN1	9.78069	9.51355	0.000208832	TRUE	non-plaque vs plaque
GMFG	8.75037	9.62274	0.000208832	TRUE	non-plaque vs plaque
NBEAL2	6.66442	7.02056	0.000208832	TRUE	non-plaque vs plaque
RNF20	9.10716	8.90703	0.000209298	TRUE	non-plaque vs plaque
ATP13A1	7.28897	7.54807	0.000209421	TRUE	non-plaque vs plaque
PDE1A	8.91714	8.28147	0.000209421	TRUE	non-plaque vs plaque
OGN	12.2218	11.5215	0.000209854	TRUE	non-plaque vs plaque
C15orf41	7.10303	6.71047	0.000210301	TRUE	non-plaque vs plaque
LILRB1	7.12146	7.81691	0.000210455	TRUE	non-plaque vs plaque
PGM1	9.46295	9.18192	0.000210519	TRUE	non-plaque vs plaque
PCDH9	4.92552	4.34603	0.000211649	TRUE	non-plaque vs plaque
SNX29	7.42489	7.69245	0.000212164	TRUE	non-plaque vs plaque
TMEM74	5.28511	4.96599	0.000212288	TRUE	non-plaque vs plaque
ASAH1	11.429	11.781	0.000212412	TRUE	non-plaque vs plaque
PRDM16	7.63186	7.10445	0.000212813	TRUE	non-plaque vs plaque
BAG3	8.54135	8.33826	0.000212813	TRUE	non-plaque vs plaque
MPP5	7.77986	7.50253	0.000212813	TRUE	non-plaque vs plaque
SCAMP2	9.15731	9.4974	0.000212813	TRUE	non-plaque vs plaque
C16orf45	7.71764	7.29627	0.000212813	TRUE	non-plaque vs plaque
MYO5C	4.34647	4.70283	0.000212873	TRUE	non-plaque vs plaque
PHGDH	7.68367	7.11968	0.000213233	TRUE	non-plaque vs plaque
CDH5	6.63408	7.27523	0.000213425	TRUE	non-plaque vs plaque
SIGLEC9	6.94925	7.63453	0.00021412	TRUE	non-plaque vs plaque
CDV3	10.0843	10.2724	0.00021412	TRUE	non-plaque vs plaque
TALDO1	9.28017	9.69825	0.000214303	TRUE	non-plaque vs plaque
CLN6	6.84437	7.31165	0.000214502	TRUE	non-plaque vs plaque
COL4A5	6.90458	6.41988	0.000215813	TRUE	non-plaque vs plaque
TP53BP2	8.83677	8.47326	0.000215976	TRUE	non-plaque vs plaque
FRK	8.32376	7.30949	0.000216274	TRUE	non-plaque vs plaque
TSPAN11	6.02112	6.2681	0.000216574	TRUE	non-plaque vs plaque
SPON1	6.90562	6.20033	0.000217108	TRUE	non-plaque vs plaque
RIC8B	7.44315	7.18836	0.000217108	TRUE	non-plaque vs plaque
RASL11A	7.65134	7.21519	0.000217445	TRUE	non-plaque vs plaque
ZNF267	8.07579	8.61926	0.000217445	TRUE	non-plaque vs plaque
CXCL16	8.65073	9.36334	0.00021839	TRUE	non-plaque vs plaque
HIVEP2	8.65649	8.37931	0.000218913	TRUE	non-plaque vs plaque
BPNT1	7.90709	7.69375	0.000220061	TRUE	non-plaque vs plaque
BTN3A3	7.19361	7.57398	0.000220806	TRUE	non-plaque vs plaque
MFSD1	10.7961	11.3339	0.000221027	TRUE	non-plaque vs plaque
SCMH1	7.96464	7.52147	0.000221842	TRUE	non-plaque vs plaque
ICAM3	6.34947	6.79273	0.000221982	TRUE	non-plaque vs plaque
GPD2	7.7386	8.10369	0.000221982	TRUE	non-plaque vs plaque
PRELP	10.9052	10.4052	0.000222472	TRUE	non-plaque vs plaque
RGS10	8.54178	8.90561	0.000222472	TRUE	non-plaque vs plaque
SUSD6	8.28968	8.602	0.000222472	TRUE	non-plaque vs plaque
MCOLN1	7.79895	8.35303	0.000222472	TRUE	non-plaque vs plaque
DUSP19	6.21904	5.44128	0.000222472	TRUE	non-plaque vs plaque
FZD7	7.6658	7.21814	0.000222472	TRUE	non-plaque vs plaque
ST6GAL2	9.00343	8.10679	0.000222472	TRUE	non-plaque vs plaque
TNF	5.75249	5.98639	0.000222472	TRUE	non-plaque vs plaque
FAM65B	5.66272	6.18805	0.000222648	TRUE	non-plaque vs plaque
CASC4	10.0858	9.90506	0.000223499	TRUE	non-plaque vs plaque
RWDD2B	7.90268	7.48166	0.000223591	TRUE	non-plaque vs plaque
HSPB1	11.4584	11.1676	0.000224292	TRUE	non-plaque vs plaque
IFIT3	6.62562	7.1923	0.000226549	TRUE	non-plaque vs plaque
ACPP	5.17703	5.6275	0.000226665	TRUE	non-plaque vs plaque
KLF15	6.52673	6.12888	0.000226665	TRUE	non-plaque vs plaque
MCM5	7.60548	7.91471	0.000226791	TRUE	non-plaque vs plaque
EIF3J-AS1	7.82231	7.56908	0.000227645	TRUE	non-plaque vs plaque
MREG	6.40451	7.34895	0.000227645	TRUE	non-plaque vs plaque
DICER1	9.51097	9.72965	0.000227668	TRUE	non-plaque vs plaque
C16orf70	7.26165	7.54697	0.000227883	TRUE	non-plaque vs plaque
HIST1H1B	7.31669	8.01266	0.000228607	TRUE	non-plaque vs plaque
CENPO	5.74092	6.04039	0.000228807	TRUE	non-plaque vs plaque
SNORD116-1	9.07792	8.43646	0.000228848	TRUE	non-plaque vs plaque
KEL	5.26276	5.78161	0.000228945	TRUE	non-plaque vs plaque
PNP	8.2274	8.89497	0.00022915	TRUE	non-plaque vs plaque
CPVL	8.45489	9.30464	0.000229406	TRUE	non-plaque vs plaque
CD82	8.55628	9.03171	0.000229526	TRUE	non-plaque vs plaque
MIR4697HG	6.39056	5.64803	0.000229526	TRUE	non-plaque vs plaque
SMAGP	6.32163	6.54462	0.000229526	TRUE	non-plaque vs plaque
DAPK3	7.67824	7.29183	0.000229526	TRUE	non-plaque vs plaque
TGFBI	9.86894	10.3931	0.000229962	TRUE	non-plaque vs plaque
C12orf49	8.14927	8.55333	0.000230074	TRUE	non-plaque vs plaque
ST14	7.24459	8.22143	0.000230232	TRUE	non-plaque vs plaque
PIK3R6	6.05768	6.42725	0.000230232	TRUE	non-plaque vs plaque
FKBP1A	7.45068	7.64974	0.000230232	TRUE	non-plaque vs plaque
NAIP	9.05869	9.60259	0.000230232	TRUE	non-plaque vs plaque
ANKRD6	8.79666	8.19976	0.000230232	TRUE	non-plaque vs plaque
PAG1	7.30027	7.76452	0.000230604	TRUE	non-plaque vs plaque
PLAC8	5.44445	6.16242	0.000230992	TRUE	non-plaque vs plaque
PEX5	7.13237	6.85367	0.000231219	TRUE	non-plaque vs plaque
CAPZA1	7.97882	8.22364	0.000231411	TRUE	non-plaque vs plaque
RRM1	8.58869	8.38908	0.000231411	TRUE	non-plaque vs plaque
SPINT1	6.60021	6.87219	0.000231411	TRUE	non-plaque vs plaque
TGFB1I1	8.82542	8.39927	0.000231411	TRUE	non-plaque vs plaque
POLQ	3.67901	3.92462	0.000231411	TRUE	non-plaque vs plaque
RASSF6	3.67855	4.25636	0.000231411	TRUE	non-plaque vs plaque
HLA-DMA	9.27487	9.92483	0.000231411	TRUE	non-plaque vs plaque
C8orf34	6.73989	5.8223	0.000231411	TRUE	non-plaque vs plaque
ITGA7	8.23619	7.56137	0.000231418	TRUE	non-plaque vs plaque
KCNE3	5.3434	5.7046	0.000231854	TRUE	non-plaque vs plaque
MIR142	3.59382	4.00267	0.000232005	TRUE	non-plaque vs plaque
ECM2	9.31033	8.58782	0.000232158	TRUE	non-plaque vs plaque
GEM	11.1393	10.3507	0.000232878	TRUE	non-plaque vs plaque
PPFIA2	7.16387	6.55524	0.000234004	TRUE	non-plaque vs plaque
GNPDA1	7.91942	8.25774	0.000234004	TRUE	non-plaque vs plaque
PRKAA2	7.99661	7.20034	0.00023419	TRUE	non-plaque vs plaque
PPIL4	8.52273	8.2633	0.00023423	TRUE	non-plaque vs plaque
TTLL4	7.12941	7.46465	0.00023462	TRUE	non-plaque vs plaque
ROR2	5.95577	6.36057	0.000235611	TRUE	non-plaque vs plaque
TNFRSF14	7.13496	7.58572	0.000235959	TRUE	non-plaque vs plaque
POLG	7.46607	7.64279	0.000236134	TRUE	non-plaque vs plaque
SYNE1	8.67197	8.27988	0.000236134	TRUE	non-plaque vs plaque
DENND3	7.72864	8.01077	0.000236276	TRUE	non-plaque vs plaque
PYCARD	7.21449	7.62864	0.000236703	TRUE	non-plaque vs plaque
PRKRA	8.9822	8.70455	0.000237074	TRUE	non-plaque vs plaque
SLC2A3	9.37095	10.1547	0.000237783	TRUE	non-plaque vs plaque
DACT1	8.23244	7.79145	0.000237783	TRUE	non-plaque vs plaque
NOSTRIN	4.03604	4.56301	0.000237783	TRUE	non-plaque vs plaque
PP13439	5.3771	5.73736	0.000238981	TRUE	non-plaque vs plaque
MYOC	5.17096	4.63901	0.0002391	TRUE	non-plaque vs plaque
ARMCX2	7.35747	7.0396	0.0002391	TRUE	non-plaque vs plaque
MAP7D3	8.04894	7.63808	0.0002391	TRUE	non-plaque vs plaque
ANKRD46	7.36069	6.97536	0.000239159	TRUE	non-plaque vs plaque
CLIC2	7.23569	7.78326	0.000239159	TRUE	non-plaque vs plaque
PLEKHA2	8.85235	9.16917	0.000239828	TRUE	non-plaque vs plaque
CREBRF	8.99703	8.65105	0.00024012	TRUE	non-plaque vs plaque
ZDHHC7	8.61727	8.88715	0.000240167	TRUE	non-plaque vs plaque
ACSL1	9.62045	10.0873	0.00024099	TRUE	non-plaque vs plaque
DAPK1	8.91215	9.47772	0.00024099	TRUE	non-plaque vs plaque
ZNF704	8.68348	8.1282	0.000241082	TRUE	non-plaque vs plaque
SPECC1	9.11331	8.71512	0.00024146	TRUE	non-plaque vs plaque
ARHGAP45	6.95446	7.38043	0.00024146	TRUE	non-plaque vs plaque
GCNT1	7.18508	7.63623	0.00024352	TRUE	non-plaque vs plaque
MICAL2	10.2606	9.8429	0.000244015	TRUE	non-plaque vs plaque
CYBA	7.73538	8.29161	0.000244626	TRUE	non-plaque vs plaque
IL27RA	6.3169	6.66825	0.000244643	TRUE	non-plaque vs plaque
SP140L	6.98484	7.29911	0.000246298	TRUE	non-plaque vs plaque
GNAZ	6.31557	6.13385	0.000246298	TRUE	non-plaque vs plaque
PATJ	8.11846	7.52811	0.000246411	TRUE	non-plaque vs plaque
PTGER2	6.29525	7.05048	0.000246411	TRUE	non-plaque vs plaque
G6PC3	7.2024	7.43126	0.000246761	TRUE	non-plaque vs plaque
BCKDHB	8.34853	7.9736	0.000248255	TRUE	non-plaque vs plaque
ACP5	7.85401	8.85543	0.000248912	TRUE	non-plaque vs plaque
SRGN	11.2186	11.8561	0.000248971	TRUE	non-plaque vs plaque
NUP93	7.7458	7.90112	0.000248971	TRUE	non-plaque vs plaque
SEPW1	9.57871	9.3018	0.000249814	TRUE	non-plaque vs plaque
PRR11	5.56953	6.00228	0.000250138	TRUE	non-plaque vs plaque
PTGIR	7.91464	7.59055	0.000250906	TRUE	non-plaque vs plaque
IGF2R	9.39765	9.82597	0.000251562	TRUE	non-plaque vs plaque
NKD1	7.05056	6.69647	0.000252545	TRUE	non-plaque vs plaque
TDP1	6.65735	6.93763	0.000252796	TRUE	non-plaque vs plaque
ZBTB47	7.79595	7.503	0.000253154	TRUE	non-plaque vs plaque
TRAF3IP3	6.45864	6.9956	0.000253279	TRUE	non-plaque vs plaque
PCDHB4	7.0805	6.30489	0.000253279	TRUE	non-plaque vs plaque
RAB33B	7.90667	7.57951	0.000254048	TRUE	non-plaque vs plaque
CA5B	9.36866	8.85319	0.00025435	TRUE	non-plaque vs plaque
MAGI2	7.03132	6.59948	0.00025441	TRUE	non-plaque vs plaque
IGF1R	8.63964	8.10443	0.000255713	TRUE	non-plaque vs plaque
SERPINB1	9.03539	9.31815	0.000256169	TRUE	non-plaque vs plaque
SPN	5.57292	5.99864	0.000256239	TRUE	non-plaque vs plaque
TCEA2	7.22557	6.98619	0.000256239	TRUE	non-plaque vs plaque
MNDA	7.51897	8.20582	0.000256403	TRUE	non-plaque vs plaque
MYO1D	11.2177	10.77	0.000256403	TRUE	non-plaque vs plaque
TBC1D22A	8.43917	8.66622	0.000256403	TRUE	non-plaque vs plaque
EIF5A2	7.19717	6.77663	0.000256403	TRUE	non-plaque vs plaque
TIAM2	6.27568	5.8756	0.000256403	TRUE	non-plaque vs plaque
LTBP1	12.3233	11.8618	0.000256671	TRUE	non-plaque vs plaque
RNF38	8.59465	8.34687	0.00025764	TRUE	non-plaque vs plaque
MRFAP1	10.8087	10.6331	0.000258178	TRUE	non-plaque vs plaque
SPOPL	8.86906	8.54868	0.000258698	TRUE	non-plaque vs plaque
APOBR	6.5329	7.03777	0.000258924	TRUE	non-plaque vs plaque
MIPOL1	6.4864	5.86522	0.000259499	TRUE	non-plaque vs plaque
AP1B1	8.79099	9.30648	0.000259606	TRUE	non-plaque vs plaque
IGFLR1	6.64653	7.00587	0.00025977	TRUE	non-plaque vs plaque
VSTM4	7.43648	6.96901	0.000260482	TRUE	non-plaque vs plaque
FLVCR2	6.98691	7.64933	0.000260788	TRUE	non-plaque vs plaque
SLC4A8	5.51263	5.94983	0.000260856	TRUE	non-plaque vs plaque
PDIA6	11.2487	11.4275	0.000260856	TRUE	non-plaque vs plaque
GPD1L	7.74621	7.22637	0.00026218	TRUE	non-plaque vs plaque
SHC4	8.33008	7.39661	0.000263129	TRUE	non-plaque vs plaque
RASSF2	8.30635	8.89534	0.000263206	TRUE	non-plaque vs plaque
COTL1	8.21586	8.77517	0.000263591	TRUE	non-plaque vs plaque
CLEC10A	6.03773	6.56415	0.000263591	TRUE	non-plaque vs plaque
TRO	6.28773	6.01329	0.000263591	TRUE	non-plaque vs plaque
STAG1	8.65238	8.43547	0.000263821	TRUE	non-plaque vs plaque
LAX1	5.46294	6.1178	0.000263974	TRUE	non-plaque vs plaque
IMPAD1	9.26935	8.89578	0.000264354	TRUE	non-plaque vs plaque
CCDC6	9.45429	9.12924	0.000266364	TRUE	non-plaque vs plaque
NGRN	9.17401	8.90002	0.000266404	TRUE	non-plaque vs plaque
DDIT4	6.46236	7.03417	0.0002668	TRUE	non-plaque vs plaque
IFT81	6.89359	6.43958	0.0002668	TRUE	non-plaque vs plaque
NFIB	9.65973	9.15829	0.0002668	TRUE	non-plaque vs plaque
RAB39A	5.9985	6.51171	0.000267498	TRUE	non-plaque vs plaque
CCDC88C	5.63302	6.19425	0.000268317	TRUE	non-plaque vs plaque
TECR	8.52793	8.77102	0.000268317	TRUE	non-plaque vs plaque
BUB1	4.97729	5.51849	0.000268317	TRUE	non-plaque vs plaque
BBX	9.7791	9.46804	0.000268317	TRUE	non-plaque vs plaque
LDB2	6.71169	7.21204	0.000268317	TRUE	non-plaque vs plaque
FBP1	7.84187	8.81075	0.000268317	TRUE	non-plaque vs plaque
MORC4	7.09876	6.89695	0.000268317	TRUE	non-plaque vs plaque
HSDL2	8.73626	8.37218	0.00026989	TRUE	non-plaque vs plaque
NRIP3	6.41062	7.15325	0.000269948	TRUE	non-plaque vs plaque
ARHGAP22	6.93074	7.24151	0.000270327	TRUE	non-plaque vs plaque
CDH13	11.2132	10.6573	0.000270597	TRUE	non-plaque vs plaque
RGN	6.90708	6.23075	0.000270716	TRUE	non-plaque vs plaque
NUDT9P1	4.91141	4.48958	0.000271824	TRUE	non-plaque vs plaque
BCAT1	9.10365	9.89823	0.000271824	TRUE	non-plaque vs plaque
ZBTB38	10.6579	10.4182	0.000271824	TRUE	non-plaque vs plaque
ADSSL1	8.45492	7.90997	0.000272331	TRUE	non-plaque vs plaque
FKBP11	6.41309	6.69382	0.000272401	TRUE	non-plaque vs plaque
CHMP4C	6.37627	5.87464	0.000275288	TRUE	non-plaque vs plaque
CTSS	10.2486	11.0291	0.000276143	TRUE	non-plaque vs plaque
STK38L	11.0321	10.5826	0.000276143	TRUE	non-plaque vs plaque
KANK2	9.19728	8.66256	0.000276143	TRUE	non-plaque vs plaque
GINS1	4.82618	5.15546	0.000276325	TRUE	non-plaque vs plaque
NGDN	7.38792	7.18721	0.000277291	TRUE	non-plaque vs plaque
ZNF583	6.80822	6.57151	0.000277291	TRUE	non-plaque vs plaque
TXNIP	12.3464	12.7051	0.000277947	TRUE	non-plaque vs plaque
CEP126	7.8001	7.23169	0.000278196	TRUE	non-plaque vs plaque
TMEM86A	7.09916	7.63391	0.000278641	TRUE	non-plaque vs plaque
CFI	6.96562	7.73122	0.000278696	TRUE	non-plaque vs plaque
HIST1H2BM	6.74821	7.40698	0.000279954	TRUE	non-plaque vs plaque
BBS7	7.21993	6.88903	0.000280397	TRUE	non-plaque vs plaque
GRINA	7.32216	7.75747	0.000280713	TRUE	non-plaque vs plaque
PEPD	8.87646	9.1472	0.000281175	TRUE	non-plaque vs plaque
SOX6	5.84258	5.48047	0.000281435	TRUE	non-plaque vs plaque
CSF3R	6.16685	6.78097	0.000281908	TRUE	non-plaque vs plaque
JAM3	9.40382	8.92444	0.000281908	TRUE	non-plaque vs plaque
RHOH	5.83688	6.35418	0.00028224	TRUE	non-plaque vs plaque
ZCCHC5	4.86911	4.30585	0.00028311	TRUE	non-plaque vs plaque
HIVEP3	5.88561	6.18651	0.000283372	TRUE	non-plaque vs plaque
MS4A4A	7.7999	8.73887	0.000283616	TRUE	non-plaque vs plaque
EVA1C	8.03598	7.70158	0.000284518	TRUE	non-plaque vs plaque
FAM8A1	8.08034	7.89886	0.000284518	TRUE	non-plaque vs plaque
GCLC	7.817	8.17944	0.000284518	TRUE	non-plaque vs plaque
ATP6V0D2	5.82376	7.24883	0.000284518	TRUE	non-plaque vs plaque
TTC21A	4.66154	4.80645	0.000285029	TRUE	non-plaque vs plaque
SOD1	10.485	10.1664	0.000285682	TRUE	non-plaque vs plaque
TET1	5.75459	5.35816	0.000287513	TRUE	non-plaque vs plaque
ZNF101	7.31524	7.5517	0.000287513	TRUE	non-plaque vs plaque
TMEM176A	8.46067	9.24394	0.000287513	TRUE	non-plaque vs plaque
APMAP	8.45086	8.83231	0.000287601	TRUE	non-plaque vs plaque
ATL3	10.3247	9.92179	0.000288555	TRUE	non-plaque vs plaque
CTNS	6.87905	7.2076	0.000288665	TRUE	non-plaque vs plaque
ABL2	7.87981	8.11376	0.00028897	TRUE	non-plaque vs plaque
GPKOW	7.87759	7.71488	0.00028898	TRUE	non-plaque vs plaque
PRSS35	7.06679	6.47551	0.000289133	TRUE	non-plaque vs plaque
RAB7B	6.08757	6.30017	0.000291074	TRUE	non-plaque vs plaque
ABHD16A	6.31854	6.5564	0.000291675	TRUE	non-plaque vs plaque
ZNF568	6.63903	6.34377	0.000292956	TRUE	non-plaque vs plaque
RAB42	5.29231	5.83145	0.000293161	TRUE	non-plaque vs plaque
IFI27	7.64237	8.32373	0.000293161	TRUE	non-plaque vs plaque
TYK2	7.42466	7.74605	0.000293161	TRUE	non-plaque vs plaque
MCUB	7.46995	8.10738	0.000297333	TRUE	non-plaque vs plaque
CXCL10	7.03982	8.09156	0.000297333	TRUE	non-plaque vs plaque
ILK	10.0866	9.71363	0.000297808	TRUE	non-plaque vs plaque
KIAA0930	7.97385	8.4865	0.000297808	TRUE	non-plaque vs plaque
RAB3GAP1	9.52152	9.21393	0.000297923	TRUE	non-plaque vs plaque
GBP5	6.75287	7.62984	0.000298539	TRUE	non-plaque vs plaque
MLX	7.73275	7.9504	0.000298539	TRUE	non-plaque vs plaque
FHL1	10.6498	9.9232	0.000299493	TRUE	non-plaque vs plaque
MYO1E	9.60432	9.82639	0.000300077	TRUE	non-plaque vs plaque
LITAF	10.4955	10.7301	0.000300077	TRUE	non-plaque vs plaque
B3GALNT2	8.96705	8.57258	0.000300522	TRUE	non-plaque vs plaque
SERPINB6	8.89515	9.0637	0.000300522	TRUE	non-plaque vs plaque
S1PR1	6.41737	6.81956	0.000301135	TRUE	non-plaque vs plaque
UAP1L1	7.32884	7.63733	0.000301135	TRUE	non-plaque vs plaque
TTC39C	6.66545	6.95257	0.000301585	TRUE	non-plaque vs plaque
SLC50A1	7.35027	7.65224	0.000302571	TRUE	non-plaque vs plaque
PTGER3	7.03354	6.43541	0.000302718	TRUE	non-plaque vs plaque
BATF	6.7645	7.09035	0.000302731	TRUE	non-plaque vs plaque
STK32A	5.8316	5.26724	0.000302731	TRUE	non-plaque vs plaque
KCNE2	4.41151	4.12876	0.000302982	TRUE	non-plaque vs plaque
KIAA1324L	7.74224	7.19943	0.000302992	TRUE	non-plaque vs plaque
PAPD4	9.23445	9.52654	0.000303309	TRUE	non-plaque vs plaque
SLC24A4	5.76312	5.36799	0.000303495	TRUE	non-plaque vs plaque
ADGRL4	6.44635	7.43632	0.000304033	TRUE	non-plaque vs plaque
POMK	7.60209	7.76165	0.000304118	TRUE	non-plaque vs plaque
UNC13D	6.50528	6.80993	0.000305053	TRUE	non-plaque vs plaque
XBP1	9.40174	9.83591	0.000305376	TRUE	non-plaque vs plaque
FBXO9	8.10873	7.90106	0.000305648	TRUE	non-plaque vs plaque
MMP7	7.0312	8.87143	0.000305956	TRUE	non-plaque vs plaque
SLC16A12	4.66772	4.29132	0.000305964	TRUE	non-plaque vs plaque
ABI3	6.6934	7.0185	0.000306142	TRUE	non-plaque vs plaque
C6orf62	9.46244	9.83377	0.000306142	TRUE	non-plaque vs plaque
ELF4	6.78678	7.20068	0.000306267	TRUE	non-plaque vs plaque
HIST1H3I	8.27419	8.96653	0.000306323	TRUE	non-plaque vs plaque
VWF	7.49246	8.35773	0.000306926	TRUE	non-plaque vs plaque
CDC42BPA	9.38959	9.00542	0.000307408	TRUE	non-plaque vs plaque
GVINP1	5.74485	6.24763	0.000307427	TRUE	non-plaque vs plaque
CLTA	8.15136	8.36717	0.000308433	TRUE	non-plaque vs plaque
KLF12	8.29789	7.89338	0.000309161	TRUE	non-plaque vs plaque
ELF2	8.23859	7.92945	0.000309161	TRUE	non-plaque vs plaque
EML1	8.03053	7.66667	0.000310046	TRUE	non-plaque vs plaque
ADM	7.32885	7.91446	0.000310265	TRUE	non-plaque vs plaque
KLF10	8.57066	8.7851	0.000310332	TRUE	non-plaque vs plaque
PTPRK	8.22039	7.87776	0.0003105	TRUE	non-plaque vs plaque
CD80	6.90853	7.69664	0.000310543	TRUE	non-plaque vs plaque
F13A1	10.7559	11.5434	0.000310543	TRUE	non-plaque vs plaque
MYO9A	8.80807	8.42917	0.000311147	TRUE	non-plaque vs plaque
PTPRG	8.81128	8.40881	0.000311147	TRUE	non-plaque vs plaque
ST8SIA4	8.06722	8.86434	0.000311326	TRUE	non-plaque vs plaque
ABCB5	4.26839	4.91436	0.000311326	TRUE	non-plaque vs plaque
TTL	8.25344	8.47452	0.000311729	TRUE	non-plaque vs plaque
SIRPB2	6.8397	7.37085	0.000312885	TRUE	non-plaque vs plaque
BCL2A1	5.04347	5.87685	0.000313067	TRUE	non-plaque vs plaque
CYFIP1	9.78939	10.0684	0.000313951	TRUE	non-plaque vs plaque
MBIP	8.08187	7.7587	0.000314665	TRUE	non-plaque vs plaque
POU2F2	6.63483	6.82663	0.000315148	TRUE	non-plaque vs plaque
RAB11FIP2	9.10804	8.83955	0.000316663	TRUE	non-plaque vs plaque
UTP18	7.67804	7.97409	0.000316713	TRUE	non-plaque vs plaque
BTG1	9.56112	9.91279	0.000316783	TRUE	non-plaque vs plaque
ZNF322	7.39833	7.08302	0.000316783	TRUE	non-plaque vs plaque
GPR146	5.5335	5.79586	0.000316783	TRUE	non-plaque vs plaque
CDC37L1	7.93146	7.55955	0.000316904	TRUE	non-plaque vs plaque
CTDSPL	8.49533	8.08422	0.00031712	TRUE	non-plaque vs plaque
FAM114A1	9.6347	9.41085	0.000317721	TRUE	non-plaque vs plaque
PPP2CB	8.96061	8.62609	0.000317795	TRUE	non-plaque vs plaque
RAPGEF4	6.00962	6.32515	0.000318232	TRUE	non-plaque vs plaque
ZNF287	6.05359	5.64818	0.000318692	TRUE	non-plaque vs plaque
PLCL1	8.28666	7.66847	0.000318692	TRUE	non-plaque vs plaque
MTMR10	8.05016	8.27582	0.000319609	TRUE	non-plaque vs plaque
NET1	10.4403	9.93471	0.000321234	TRUE	non-plaque vs plaque
ZNF362	8.52612	8.11789	0.000322646	TRUE	non-plaque vs plaque
COL21A1	9.98548	9.27222	0.000322646	TRUE	non-plaque vs plaque
CD1C	5.58113	6.18318	0.000323199	TRUE	non-plaque vs plaque
VAC14	6.4944	6.91634	0.000323199	TRUE	non-plaque vs plaque
BST2	7.46547	7.94179	0.000323199	TRUE	non-plaque vs plaque
GCNT4	6.68206	6.06152	0.000323199	TRUE	non-plaque vs plaque
TRPM2	6.81486	7.1918	0.000323229	TRUE	non-plaque vs plaque
GLRX	8.31417	8.93764	0.000323229	TRUE	non-plaque vs plaque
CARD8	6.57772	6.81299	0.000323625	TRUE	non-plaque vs plaque
ACKR1	5.6085	6.01258	0.000324134	TRUE	non-plaque vs plaque
NUDT11	5.60068	5.33435	0.000327041	TRUE	non-plaque vs plaque
FOXN3	9.52861	9.19865	0.000327974	TRUE	non-plaque vs plaque
FYN	7.84383	8.24497	0.000327974	TRUE	non-plaque vs plaque
HFE	6.85291	7.10904	0.000328973	TRUE	non-plaque vs plaque
DUSP6	8.8284	9.20469	0.00032935	TRUE	non-plaque vs plaque
CASP12	5.47137	4.87936	0.000329628	TRUE	non-plaque vs plaque
TERF1	8.06632	7.78001	0.000329989	TRUE	non-plaque vs plaque
SLC31A1	8.41542	8.82963	0.00033145	TRUE	non-plaque vs plaque
SLFN5	9.27155	9.62362	0.000331745	TRUE	non-plaque vs plaque
SRD5A3	7.29398	7.59215	0.00033207	TRUE	non-plaque vs plaque
TRAF3IP1	7.99991	7.75206	0.000333588	TRUE	non-plaque vs plaque
VAMP8	9.20553	10.056	0.000335701	TRUE	non-plaque vs plaque
TARBP1	7.31385	7.5819	0.000336473	TRUE	non-plaque vs plaque
GPRASP1	7.41537	6.75916	0.000336617	TRUE	non-plaque vs plaque
TRPC6	5.42272	5.05997	0.000337752	TRUE	non-plaque vs plaque
NR5A2	5.20153	5.55445	0.000338142	TRUE	non-plaque vs plaque
PRTFDC1	5.88954	5.50977	0.000339368	TRUE	non-plaque vs plaque
ARL11	4.98436	5.32632	0.000339518	TRUE	non-plaque vs plaque
WWP1	9.04961	9.35592	0.000339946	TRUE	non-plaque vs plaque
TGFB2	8.63495	8.03849	0.000340572	TRUE	non-plaque vs plaque
SLC37A3	8.63394	8.22063	0.000340572	TRUE	non-plaque vs plaque
FHAD1	5.76437	6.22023	0.000340796	TRUE	non-plaque vs plaque
SCN2A	4.29224	3.83809	0.00034317	TRUE	non-plaque vs plaque
RNF149	8.99376	9.35606	0.00034317	TRUE	non-plaque vs plaque
DOK4	7.36437	7.05373	0.000343602	TRUE	non-plaque vs plaque
SLC35F6	7.51121	7.83146	0.00034376	TRUE	non-plaque vs plaque
UHMK1	9.28589	9.48125	0.000343772	TRUE	non-plaque vs plaque
TULP3	7.39138	7.08823	0.000344047	TRUE	non-plaque vs plaque
ARHGEF25	8.31905	7.69096	0.000344214	TRUE	non-plaque vs plaque
RNASE6	8.51335	9.24978	0.000344214	TRUE	non-plaque vs plaque
BCL9	7.05043	6.71911	0.000346578	TRUE	non-plaque vs plaque
DPYD	9.4318	9.7854	0.000346758	TRUE	non-plaque vs plaque
RNF152	7.78459	7.30924	0.000346758	TRUE	non-plaque vs plaque
FPR3	9.32055	10.1416	0.000346758	TRUE	non-plaque vs plaque
JAG1	10.4826	10.022	0.000346758	TRUE	non-plaque vs plaque
TMEM246	5.38189	5.14735	0.000346758	TRUE	non-plaque vs plaque
HNMT	7.91708	8.21944	0.000347711	TRUE	non-plaque vs plaque
PTPRC	9.4135	10.2038	0.000348209	TRUE	non-plaque vs plaque
LOC441081	7.8433	8.54435	0.000348437	TRUE	non-plaque vs plaque
PPP1R12B	7.67536	7.18311	0.000348494	TRUE	non-plaque vs plaque
EFEMP1	12.6306	12.388	0.000348494	TRUE	non-plaque vs plaque
N6AMT1	7.00132	6.51822	0.000348494	TRUE	non-plaque vs plaque
HMGXB3	7.61373	7.81437	0.000348895	TRUE	non-plaque vs plaque
ZNF366	5.33358	5.68919	0.000349175	TRUE	non-plaque vs plaque
STK38	8.33312	8.54099	0.000350555	TRUE	non-plaque vs plaque
GARS	9.36772	9.61324	0.000352305	TRUE	non-plaque vs plaque
CDK17	7.40177	7.59824	0.000352512	TRUE	non-plaque vs plaque
PELI2	7.79163	7.54278	0.000352619	TRUE	non-plaque vs plaque
ZNF710	7.62798	7.99367	0.000352619	TRUE	non-plaque vs plaque
TAF7	8.17486	7.90245	0.000352831	TRUE	non-plaque vs plaque
EPC2	8.16516	7.9328	0.000353629	TRUE	non-plaque vs plaque
ACP6	6.95026	6.62076	0.000354127	TRUE	non-plaque vs plaque
OSCAR	5.79222	6.09369	0.00035428	TRUE	non-plaque vs plaque
SNORD116-20	10.2787	9.78471	0.000354462	TRUE	non-plaque vs plaque
HIST1H1A	7.05322	6.66605	0.000354756	TRUE	non-plaque vs plaque
MGAT1	8.20294	8.71904	0.00035542	TRUE	non-plaque vs plaque
DCP2	8.30304	8.50332	0.000356657	TRUE	non-plaque vs plaque
CYYR1	6.29386	6.93886	0.00035705	TRUE	non-plaque vs plaque
CASK	8.87495	8.54353	0.000357523	TRUE	non-plaque vs plaque
PDS5B	8.67435	8.34066	0.000359407	TRUE	non-plaque vs plaque
JRKL	8.57222	8.2043	0.000359821	TRUE	non-plaque vs plaque
MAGI3	7.55851	7.18637	0.000359983	TRUE	non-plaque vs plaque
CAPG	9.41234	10.2309	0.000359983	TRUE	non-plaque vs plaque
PTGIS	11.0901	10.6271	0.000359983	TRUE	non-plaque vs plaque
CYP4X1	8.39386	7.69339	0.000360829	TRUE	non-plaque vs plaque
ECH1	9.74429	9.9157	0.000360829	TRUE	non-plaque vs plaque
ZBTB41	8.70622	8.36122	0.000361125	TRUE	non-plaque vs plaque
PTEN	10.3557	10.1851	0.000361534	TRUE	non-plaque vs plaque
PAQR5	5.8323	6.44596	0.000362665	TRUE	non-plaque vs plaque
SH3TC1	6.34831	6.69034	0.000362686	TRUE	non-plaque vs plaque
SQRDL	8.51051	8.85797	0.000362807	TRUE	non-plaque vs plaque
ADCY4	6.02419	6.32347	0.000363189	TRUE	non-plaque vs plaque
DMPK	8.49179	8.02727	0.000363199	TRUE	non-plaque vs plaque
RPL28	7.30204	7.49096	0.000363743	TRUE	non-plaque vs plaque
HTATSF1	8.44065	8.22867	0.000363743	TRUE	non-plaque vs plaque
AGFG1	9.88406	10.1425	0.000363744	TRUE	non-plaque vs plaque
PPT1	10.69	10.9717	0.000364043	TRUE	non-plaque vs plaque
SUSD1	7.44555	7.92712	0.000364043	TRUE	non-plaque vs plaque
GPR65	6.45071	7.25418	0.000364679	TRUE	non-plaque vs plaque
KCNJ3	6.66798	6.0757	0.000364679	TRUE	non-plaque vs plaque
GNPDA2	6.89393	6.48436	0.000364679	TRUE	non-plaque vs plaque
NOD1	6.23432	6.44467	0.000364679	TRUE	non-plaque vs plaque
KIAA0100	8.90287	9.14735	0.000366812	TRUE	non-plaque vs plaque
PCBP4	6.44762	6.18628	0.000367452	TRUE	non-plaque vs plaque
RANBP17	6.18061	5.84003	0.000367452	TRUE	non-plaque vs plaque
WAS	6.82768	7.25636	0.000369302	TRUE	non-plaque vs plaque
MTMR2	9.30725	9.07811	0.000370233	TRUE	non-plaque vs plaque
RAMP1	8.39215	8.11397	0.000370233	TRUE	non-plaque vs plaque
DNER	5.9984	5.77663	0.000370233	TRUE	non-plaque vs plaque
ENPP1	9.47326	8.89697	0.000370375	TRUE	non-plaque vs plaque
MAN1A1	9.16085	9.44374	0.000371389	TRUE	non-plaque vs plaque
CPNE3	9.83001	9.53958	0.000371813	TRUE	non-plaque vs plaque
FMR1	8.1859	8.00268	0.000371813	TRUE	non-plaque vs plaque
KIAA1551	9.18339	9.49397	0.000372317	TRUE	non-plaque vs plaque
KIAA1161	6.04004	5.80873	0.000372317	TRUE	non-plaque vs plaque
KIAA1671	8.96887	8.45121	0.00037333	TRUE	non-plaque vs plaque
KCNA3	6.18983	6.88062	0.000374205	TRUE	non-plaque vs plaque
PIP4K2C	7.69688	7.51557	0.000374205	TRUE	non-plaque vs plaque
FAM188A	8.23054	7.91051	0.000374983	TRUE	non-plaque vs plaque
NFIX	8.70146	8.1969	0.000374983	TRUE	non-plaque vs plaque
THYN1	7.54222	7.3639	0.000375344	TRUE	non-plaque vs plaque
COQ2	7.41538	7.78096	0.000375666	TRUE	non-plaque vs plaque
ACY1	6.48769	6.67372	0.000375777	TRUE	non-plaque vs plaque
C7	5.43147	6.45572	0.000375777	TRUE	non-plaque vs plaque
NBEA	6.85053	6.38847	0.00037674	TRUE	non-plaque vs plaque
KIAA1841	6.78196	7.04922	0.00037674	TRUE	non-plaque vs plaque
NT5DC1	8.72336	8.3399	0.00037674	TRUE	non-plaque vs plaque
SENP6	9.47439	9.13378	0.000376891	TRUE	non-plaque vs plaque
ATP8B2	9.01986	8.64648	0.000377925	TRUE	non-plaque vs plaque
ZNF33B	7.14439	6.80901	0.000378004	TRUE	non-plaque vs plaque
CRISPLD1	9.88075	8.88784	0.000378004	TRUE	non-plaque vs plaque
ZC2HC1A	8.16826	7.78899	0.000378004	TRUE	non-plaque vs plaque
IL11RA	7.30244	6.99697	0.000378004	TRUE	non-plaque vs plaque
PDE4B	6.3519	6.74572	0.000378459	TRUE	non-plaque vs plaque
SELENBP1	7.94885	7.59854	0.000378459	TRUE	non-plaque vs plaque
PCDHB12	6.55788	6.04429	0.000378459	TRUE	non-plaque vs plaque
USO1	10.5629	10.299	0.000378618	TRUE	non-plaque vs plaque
ORC4	7.69742	7.39766	0.000378791	TRUE	non-plaque vs plaque
REEP2	6.58582	6.33824	0.000379899	TRUE	non-plaque vs plaque
WDR47	8.04239	7.80397	0.000381119	TRUE	non-plaque vs plaque
NRAS	9.41892	9.67366	0.000381119	TRUE	non-plaque vs plaque
[truncated: 38,638 more rows]
