# Supplementary material for: Bioinformatic Analysis Revealed the Essential Regulatory Genes and Pathways of Early and Advanced Atherosclerotic Plaque in Humans
Source: Cells. 2022 Dec 8;11(24):3976. doi: 10.3390/cells11243976 (PMC9776921; doi:10.3390/cells11243976)
Supplement: Supplementary file 1 [file cells-11-03976-s001.zip › Table S2.xlsx]

## Sheet: GO KEGG
Table S2 The GO and KEGG analysis of the 259 common upregulated genes
ID	Description	GeneRatio	BgRatio	pvalue	p.adjust	qvalue	geneID	Count	Type
GO:0043312	neutrophil degranulation	48/240	487/18866	6.08413e-29	1.31349e-25	8.86472e-26	MMP9/VAMP8/TYROBP/CTSS/CD14/FCER1G/C3AR1/CLEC5A/ITGAM/ITGB2/CTSB/CHI3L1/C5AR1/AMPD3/CTSC/LYZ/GMFG/LAIR1/S100A9/PTPRC/MNDA/TNFRSF1B/PLAUR/PTPN6/FGR/GRN/CD36/ALOX5/CHIT1/PLAU/CTSH/NCKAP1L/LILRB2/SYK/FCGR2A/MAN2B1/ITGAL/GLA/SLC2A3/CD53/IQGAP2/CD300A/VNN1/HK3/BIN2/PLAC8/PLEKHO2/DOCK2	48	GO
GO:0002283	neutrophil activation involved in immune response	48/240	490/18866	8.04344e-29	1.31349e-25	8.86472e-26	MMP9/VAMP8/TYROBP/CTSS/CD14/FCER1G/C3AR1/CLEC5A/ITGAM/ITGB2/CTSB/CHI3L1/C5AR1/AMPD3/CTSC/LYZ/GMFG/LAIR1/S100A9/PTPRC/MNDA/TNFRSF1B/PLAUR/PTPN6/FGR/GRN/CD36/ALOX5/CHIT1/PLAU/CTSH/NCKAP1L/LILRB2/SYK/FCGR2A/MAN2B1/ITGAL/GLA/SLC2A3/CD53/IQGAP2/CD300A/VNN1/HK3/BIN2/PLAC8/PLEKHO2/DOCK2	48	GO
GO:0002697	regulation of immune effector process	43/240	470/18866	1.28329e-24	1.39708e-21	9.42883e-22	MMP12/CCL19/FCGR2B/C1QB/VAMP8/C1QC/TYROBP/SLAMF8/FCER1G/C3AR1/ITGAM/HLA-DMB/C1QA/ITGB2/VSIG4/C5AR1/P2RX7/CFI/TNFAIP3/RAC2/CD86/HMOX1/IL7R/PTPRC/LYN/IGKC/TNFRSF1B/PTPN6/FGR/LGALS9/GRN/ARRB2/CD36/C7/SYK/VAV1/LILRB1/BTK/C2/ICAM1/MZB1/CD84/CD300A	43	GO
GO:0070661	leukocyte proliferation	34/240	313/18866	5.88053e-22	4.80145e-19	3.24048e-19	CCL19/FCGR2B/TNFSF13B/TYROBP/HLA-DMB/VSIG4/P2RX7/CSF1R/TNFAIP3/CCL8/GPR183/CORO1A/RAC2/CD86/IL7R/TREM2/PTPRC/MNDA/AIF1/LYN/CD180/TNFRSF1B/PTPN6/LGALS9/NCKAP1L/TNFRSF21/LILRB2/SYK/LILRB1/BTK/MZB1/DOCK8/CD300A/DOCK2	34	GO
GO:0006909	phagocytosis	36/240	382/18866	4.13654e-21	2.70199e-18	1.82356e-18	FCGR2B/TYROBP/CD14/FCER1G/NCF2/ITGAM/ITGB2/HCK/P2RX7/MARCO/IRF8/CORO1A/RAC2/TREM2/PTPRC/AIF1/LYN/IGKC/IL2RG/FGR/NCF4/CD36/NCKAP1L/MSR1/SYK/VAV1/FCGR2A/ELMO1/C2/ITGAL/MYO1G/NR1H3/CD300A/ABCA1/BIN2/DOCK2	36	GO
GO:0030595	leukocyte chemotaxis	28/240	232/18866	1.83808e-19	1.00053e-16	6.75251e-17	CCL18/CCL19/CXCR4/SLAMF8/FCER1G/C3AR1/CCR1/ITGB2/CXCL16/C5AR1/PLA2G7/CSF1R/CCL8/GPR183/CORO1A/RAC2/S100A9/LGMN/AIF1/LYN/CCL21/LGALS9/ALOX5/NCKAP1L/CXCL8/SYK/VAV1/CXCL2	28	GO
GO:0046651	lymphocyte proliferation	30/240	283/18866	3.66782e-19	1.7113e-16	1.15495e-16	CCL19/FCGR2B/TNFSF13B/TYROBP/HLA-DMB/VSIG4/P2RX7/GPR183/CORO1A/RAC2/CD86/IL7R/PTPRC/MNDA/AIF1/LYN/CD180/TNFRSF1B/PTPN6/LGALS9/NCKAP1L/TNFRSF21/LILRB2/SYK/LILRB1/BTK/MZB1/DOCK8/CD300A/DOCK2	30	GO
GO:0070663	regulation of leukocyte proliferation	28/240	240/18866	4.61272e-19	1.78991e-16	1.208e-16	CCL19/FCGR2B/TNFSF13B/TYROBP/HLA-DMB/VSIG4/CSF1R/TNFAIP3/CCL8/GPR183/CORO1A/RAC2/CD86/PTPRC/MNDA/AIF1/LYN/TNFRSF1B/PTPN6/LGALS9/NCKAP1L/TNFRSF21/LILRB2/SYK/LILRB1/BTK/MZB1/CD300A	28	GO
GO:0032943	mononuclear cell proliferation	30/240	286/18866	4.95505e-19	1.78991e-16	1.208e-16	CCL19/FCGR2B/TNFSF13B/TYROBP/HLA-DMB/VSIG4/P2RX7/GPR183/CORO1A/RAC2/CD86/IL7R/PTPRC/MNDA/AIF1/LYN/CD180/TNFRSF1B/PTPN6/LGALS9/NCKAP1L/TNFRSF21/LILRB2/SYK/LILRB1/BTK/MZB1/DOCK8/CD300A/DOCK2	30	GO
GO:0060326	cell chemotaxis	31/240	311/18866	5.48044e-19	1.78991e-16	1.208e-16	CCL18/CCL19/CXCR4/SLAMF8/FCER1G/C3AR1/CCR1/ITGB2/CXCL16/C5AR1/PLA2G7/CSF1R/CCL8/GPR183/CORO1A/RAC2/S100A9/LGMN/AIF1/LYN/CCL21/LGALS9/ARRB2/ALOX5/NCKAP1L/CXCL8/SYK/VAV1/CXCL2/TIAM1/BIN2	31	GO
GO:0007159	leukocyte cell-cell adhesion	33/240	364/18866	6.84721e-19	2.033e-16	1.37206e-16	CCL19/FCGR2B/TNFSF13B/HLA-DMB/ITGB2/VSIG4/CORO1A/FERMT3/RAC2/CD86/CD83/IL7R/S100A9/PTPRC/AIF1/LYN/CCL21/PTPN6/LGALS9/ALOX5/NCKAP1L/TNFRSF21/LILRB2/SYK/VAV1/LILRB1/ICAM1/ITGAL/SELPLG/DOCK8/ITGA4/CD300A/VNN1	33	GO
GO:0042110	T cell activation	36/240	483/18866	9.33729e-18	2.5413e-15	1.71511e-15	CCL19/FCGR2B/TNFSF13B/FCER1G/HLA-DMB/VSIG4/P2RX7/LCP1/GPR183/CORO1A/RAC2/CD86/CD83/IL7R/MAFB/PTPRC/AIF1/LYN/TNFRSF1B/CCL21/PTPN6/LGALS9/CTSL/NCKAP1L/TNFRSF21/LILRB2/SYK/VAV1/LILRB1/ICAM1/ITGAL/DOCK8/CD300A/VNN1/DOCK2/PRDM1	36	GO
GO:0002237	response to molecule of bacterial origin	31/240	356/18866	2.70327e-17	6.79145e-15	4.58352e-15	ACP5/FCGR2B/CD14/CSF2RB/LY86/LY96/HCK/C5AR1/MRC1/P2RX7/TNFAIP3/IRF8/CD86/IL10RA/S100A9/TREM2/LYN/CD180/TNFRSF1B/CASP1/LGALS9/CD36/TLR1/CXCL8/LILRB2/CXCL2/LILRB1/ICAM1/NR1H3/KMO/ABCA1	31	GO
GO:0050867	positive regulation of cell activation	33/240	421/18866	5.51234e-17	1.28595e-14	8.67883e-15	CCL19/TNFSF13B/VAMP8/TYROBP/FCER1G/ITGAM/HLA-DMB/ITGB2/CTSC/GPR183/CORO1A/CD86/CD83/PLEK/IL7R/TREM2/PTPRC/AIF1/LYN/IGKC/CCL21/PTPN6/FGR/LGALS9/NCKAP1L/LILRB2/SYK/VAV1/LILRB1/BTK/RPS6KA1/DOCK8/VNN1	33	GO
GO:0050670	regulation of lymphocyte proliferation	25/240	219/18866	6.71816e-17	1.46277e-14	9.87216e-15	CCL19/FCGR2B/TNFSF13B/TYROBP/HLA-DMB/VSIG4/GPR183/CORO1A/RAC2/CD86/PTPRC/MNDA/AIF1/LYN/TNFRSF1B/PTPN6/LGALS9/NCKAP1L/TNFRSF21/LILRB2/SYK/LILRB1/BTK/MZB1/CD300A	25	GO
GO:0032944	regulation of mononuclear cell proliferation	25/240	221/18866	8.35851e-17	1.70618e-14	1.15149e-14	CCL19/FCGR2B/TNFSF13B/TYROBP/HLA-DMB/VSIG4/GPR183/CORO1A/RAC2/CD86/PTPRC/MNDA/AIF1/LYN/TNFRSF1B/PTPN6/LGALS9/NCKAP1L/TNFRSF21/LILRB2/SYK/LILRB1/BTK/MZB1/CD300A	25	GO
GO:0071216	cellular response to biotic stimulus	26/240	246/18866	1.05752e-16	2.03169e-14	1.37118e-14	FCGR2B/CD14/LY86/LY96/HCK/MRC1/TNFAIP3/IRF8/CD86/TREM2/LYN/CD180/TNFRSF1B/CASP1/CD36/TLR1/CXCL8/LILRB2/SYK/CXCL2/LILRB1/BTK/ICAM1/NR1H3/KMO/ABCA1	26	GO
GO:0002703	regulation of leukocyte mediated immunity	24/240	211/18866	3.1386e-16	5.69481e-14	3.84341e-14	FCGR2B/VAMP8/TYROBP/FCER1G/ITGAM/ITGB2/P2RX7/RAC2/HMOX1/IL7R/PTPRC/LYN/TNFRSF1B/PTPN6/FGR/LGALS9/ARRB2/SYK/VAV1/LILRB1/BTK/ICAM1/CD84/CD300A	24	GO
GO:0032496	response to lipopolysaccharide	29/240	334/18866	3.33487e-16	5.73246e-14	3.86882e-14	ACP5/CD14/CSF2RB/LY86/LY96/HCK/C5AR1/MRC1/P2RX7/TNFAIP3/IRF8/CD86/IL10RA/S100A9/TREM2/LYN/CD180/TNFRSF1B/CASP1/LGALS9/CD36/CXCL8/LILRB2/CXCL2/LILRB1/ICAM1/NR1H3/KMO/ABCA1	29	GO
GO:0002886	regulation of myeloid leukocyte mediated immunity	15/240	58/18866	4.36316e-16	7.12504e-14	4.80866e-14	FCGR2B/VAMP8/TYROBP/FCER1G/ITGAM/ITGB2/RAC2/HMOX1/LYN/FGR/LGALS9/SYK/BTK/CD84/CD300A	15	GO
GO:0071219	cellular response to molecule of bacterial origin	24/240	222/18866	1.00834e-15	1.49693e-13	1.01027e-13	FCGR2B/CD14/LY86/LY96/HCK/MRC1/TNFAIP3/IRF8/CD86/TREM2/LYN/CD180/TNFRSF1B/CASP1/CD36/TLR1/CXCL8/LILRB2/CXCL2/LILRB1/ICAM1/NR1H3/KMO/ABCA1	24	GO
GO:0097529	myeloid leukocyte migration	24/240	222/18866	1.00834e-15	1.49693e-13	1.01027e-13	CCL18/CCL19/SLAMF8/FCER1G/C3AR1/CCR1/ITGB2/C5AR1/PLA2G7/CSF1R/CCL8/RAC2/S100A9/LGMN/TREM2/AIF1/LYN/CCL21/NCKAP1L/CXCL8/SYK/VAV1/CXCL2/CD300A	24	GO
GO:0002696	positive regulation of leukocyte activation	31/240	406/18866	1.08923e-15	1.54671e-13	1.04387e-13	CCL19/TNFSF13B/VAMP8/TYROBP/FCER1G/ITGAM/HLA-DMB/ITGB2/CTSC/GPR183/CORO1A/CD86/CD83/IL7R/TREM2/PTPRC/AIF1/LYN/IGKC/CCL21/PTPN6/FGR/LGALS9/NCKAP1L/LILRB2/SYK/VAV1/LILRB1/BTK/DOCK8/VNN1	31	GO
GO:1903037	regulation of leukocyte cell-cell adhesion	28/240	329/18866	1.8684e-15	2.54258e-13	1.71597e-13	CCL19/FCGR2B/TNFSF13B/HLA-DMB/ITGB2/VSIG4/CORO1A/CD86/CD83/IL7R/PTPRC/AIF1/LYN/CCL21/PTPN6/LGALS9/ALOX5/NCKAP1L/TNFRSF21/LILRB2/SYK/VAV1/LILRB1/ICAM1/DOCK8/ITGA4/CD300A/VNN1	28	GO
GO:1903039	positive regulation of leukocyte cell-cell adhesion	24/240	235/18866	3.68106e-15	4.80894e-13	3.24553e-13	CCL19/TNFSF13B/HLA-DMB/ITGB2/CORO1A/CD86/CD83/IL7R/PTPRC/AIF1/LYN/CCL21/PTPN6/LGALS9/ALOX5/NCKAP1L/LILRB2/SYK/VAV1/LILRB1/ICAM1/DOCK8/ITGA4/VNN1	24	GO
GO:1902105	regulation of leukocyte differentiation	26/240	290/18866	5.8002e-15	7.28595e-13	4.91726e-13	CCL19/FCGR2B/C1QC/TYROBP/EVI2B/SLAMF8/CCR1/TMEM176A/CD86/CD83/HCLS1/IL7R/MAFB/TREM2/PTPRC/LYN/PTPN6/LGALS9/NCKAP1L/TMEM176B/LILRB2/SYK/LILRB1/BTK/VNN1/PRDM1	26	GO
GO:0002224	toll-like receptor signaling pathway	20/240	152/18866	6.06191e-15	7.33267e-13	4.94879e-13	CTSS/CD14/ITGAM/LY96/ITGB2/CTSB/TNFAIP3/PIK3AP1/S100A9/LGMN/LYN/ARRB2/CD36/TLR1/CTSL/TLR8/BTK/NR1H3/CD300A/CTSK	20	GO
GO:0002699	positive regulation of immune effector process	23/240	223/18866	1.14469e-14	1.3352e-12	9.0112e-13	CCL19/VAMP8/TYROBP/FCER1G/ITGAM/HLA-DMB/ITGB2/P2RX7/RAC2/CD86/HMOX1/PTPRC/LYN/FGR/LGALS9/CD36/SYK/VAV1/LILRB1/BTK/MZB1/CD84/CD300A	23	GO
GO:0043300	regulation of leukocyte degranulation	13/240	47/18866	1.58223e-14	1.78192e-12	1.20261e-12	FCGR2B/VAMP8/FCER1G/ITGAM/ITGB2/RAC2/HMOX1/LYN/FGR/LGALS9/SYK/CD84/CD300A	13	GO
GO:0050863	regulation of T cell activation	27/240	332/18866	1.87193e-14	2.03791e-12	1.37538e-12	CCL19/FCGR2B/TNFSF13B/HLA-DMB/VSIG4/CORO1A/RAC2/CD86/CD83/IL7R/PTPRC/AIF1/LYN/TNFRSF1B/CCL21/PTPN6/LGALS9/NCKAP1L/TNFRSF21/LILRB2/SYK/VAV1/LILRB1/DOCK8/CD300A/VNN1/PRDM1	27	GO
GO:0022409	positive regulation of cell-cell adhesion	25/240	279/18866	2.01267e-14	2.12044e-12	1.43108e-12	CCL19/TNFSF13B/HLA-DMB/ITGB2/CORO1A/CD86/CD83/IL7R/PTPRC/AIF1/LYN/PLAUR/CCL21/PTPN6/LGALS9/ALOX5/NCKAP1L/LILRB2/SYK/VAV1/LILRB1/ICAM1/DOCK8/ITGA4/VNN1	25	GO
GO:0002695	negative regulation of leukocyte activation	21/240	184/18866	2.26466e-14	2.31137e-12	1.55993e-12	FCGR2B/TYROBP/VSIG4/TNFAIP3/CD86/HMOX1/PTPRC/MNDA/LYN/PTPN6/FGR/LGALS9/GRN/TNFRSF21/LILRB2/LILRB1/BTK/SAMSN1/CD84/NR1H3/CD300A	21	GO
GO:0050866	negative regulation of cell activation	22/240	207/18866	2.37567e-14	2.35119e-12	1.58681e-12	FCGR2B/TYROBP/APOE/VSIG4/TNFAIP3/CD86/HMOX1/PTPRC/MNDA/LYN/PTPN6/FGR/LGALS9/GRN/TNFRSF21/LILRB2/LILRB1/BTK/SAMSN1/CD84/NR1H3/CD300A	22	GO
GO:0002685	regulation of leukocyte migration	22/240	212/18866	3.90676e-14	3.70002e-12	2.49713e-12	CCL19/SLAMF8/C3AR1/CCR1/C5AR1/PLA2G7/CSF1R/CCL8/RAC2/HMOX1/LGMN/TREM2/AIF1/LYN/CCL21/LGALS9/NCKAP1L/CXCL8/ICAM1/DOCK8/ITGA4/CD300A	22	GO
GO:0002683	negative regulation of immune system process	31/240	463/18866	3.96512e-14	3.70002e-12	2.49713e-12	MMP12/FCGR2B/C1QC/TYROBP/SLAMF8/FCER1G/VSIG4/TMEM176A/TNFAIP3/CD86/HMOX1/IL7R/MAFB/PTPRC/MNDA/LYN/CCL21/PTPN6/FGR/LGALS9/GRN/ARRB2/TNFRSF21/TMEM176B/LILRB2/LILRB1/BTK/SAMSN1/CD84/NR1H3/CD300A	31	GO
GO:0022407	regulation of cell-cell adhesion	30/240	439/18866	6.19487e-14	5.62012e-12	3.793e-12	CCL19/FCGR2B/TNFSF13B/HLA-DMB/ITGB2/VSIG4/CORO1A/FERMT3/CD86/CD83/IL7R/PTPRC/AIF1/LYN/PLAUR/CCL21/PTPN6/LGALS9/ALOX5/NCKAP1L/TNFRSF21/LILRB2/SYK/VAV1/LILRB1/ICAM1/DOCK8/ITGA4/CD300A/VNN1	30	GO
GO:0006898	receptor-mediated endocytosis	26/240	328/18866	1.07214e-13	9.46378e-12	6.38707e-12	CCL19/FCGR2B/CD14/FCER1G/APOE/ITGAM/ITGB2/CXCL16/APOC1/MRC1/MARCO/CD163/SIGLEC1/IGKC/CCL21/DAB2/ARRB2/CD36/CTSL/MSR1/CXCL8/SYK/LILRB1/ITGA4/MX2/FOLR2	26	GO
GO:0042116	macrophage activation	16/240	101/18866	1.74514e-13	1.49991e-11	1.01228e-11	FCGR2B/TYROBP/ITGAM/C1QA/ITGB2/VSIG4/C5AR1/CTSC/TREM2/PTPRC/AIF1/GRN/TLR1/TLR8/SYK/NR1H3	16	GO
GO:0070664	negative regulation of leukocyte proliferation	15/240	86/18866	2.33103e-13	1.95209e-11	1.31746e-11	FCGR2B/TYROBP/VSIG4/TNFAIP3/CCL8/CD86/MNDA/LYN/PTPN6/LGALS9/TNFRSF21/LILRB2/LILRB1/BTK/CD300A	15	GO
GO:0071222	cellular response to lipopolysaccharide	21/240	208/18866	2.61765e-13	2.13731e-11	1.44247e-11	CD14/LY86/LY96/HCK/MRC1/TNFAIP3/IRF8/CD86/LYN/CD180/TNFRSF1B/CASP1/CD36/CXCL8/LILRB2/CXCL2/LILRB1/ICAM1/NR1H3/KMO/ABCA1	21	GO
GO:0002687	positive regulation of leukocyte migration	18/240	142/18866	2.77144e-13	2.20768e-11	1.48996e-11	CCL19/C3AR1/CCR1/C5AR1/PLA2G7/CSF1R/CCL8/RAC2/LGMN/TREM2/AIF1/CCL21/LGALS9/NCKAP1L/CXCL8/ICAM1/DOCK8/ITGA4	18	GO
GO:0001909	leukocyte mediated cytotoxicity	16/240	108/18866	5.13363e-13	3.99201e-11	2.69419e-11	FCGR2B/TYROBP/ITGAM/P2RX7/CTSC/CORO1A/IL7R/PTPRC/PTPN6/LGALS9/ARRB2/CTSH/VAV1/LILRB1/ICAM1/SLAMF7	16	GO
GO:0097530	granulocyte migration	18/240	150/18866	7.23167e-13	5.45957e-11	3.68464e-11	CCL18/CCL19/SLAMF8/FCER1G/C3AR1/ITGB2/C5AR1/CSF1R/CCL8/RAC2/S100A9/CCL21/NCKAP1L/CXCL8/SYK/VAV1/CXCL2/CD300A	18	GO
GO:0042098	T cell proliferation	20/240	195/18866	7.35521e-13	5.45957e-11	3.68464e-11	CCL19/TNFSF13B/HLA-DMB/VSIG4/P2RX7/CORO1A/RAC2/CD86/PTPRC/AIF1/TNFRSF1B/PTPN6/LGALS9/NCKAP1L/TNFRSF21/LILRB2/SYK/LILRB1/DOCK8/DOCK2	20	GO
GO:0002221	pattern recognition receptor signaling pathway	20/240	201/18866	1.30048e-12	9.43856e-11	6.37005e-11	CTSS/CD14/ITGAM/LY96/ITGB2/CTSB/TNFAIP3/PIK3AP1/S100A9/LGMN/LYN/ARRB2/CD36/TLR1/CTSL/TLR8/BTK/NR1H3/CD300A/CTSK	20	GO
GO:0002449	lymphocyte mediated immunity	26/240	366/18866	1.35378e-12	9.61182e-11	6.48698e-11	FCGR2B/C1QB/C1QC/FCER1G/C1QA/P2RX7/CFI/CTSC/CORO1A/IL7R/PTPRC/IGKC/TNFRSF1B/PTPN6/LGALS9/ARRB2/C7/CTSH/TLR8/VAV1/LILRB1/BTK/C2/ICAM1/MYO1G/SLAMF7	26	GO
GO:0050777	negative regulation of immune response	18/240	159/18866	1.98579e-12	1.37991e-10	9.31296e-11	MMP12/FCGR2B/SLAMF8/VSIG4/TNFAIP3/HMOX1/IL7R/PTPRC/LYN/PTPN6/LGALS9/GRN/ARRB2/LILRB1/SAMSN1/CD84/NR1H3/CD300A	18	GO
GO:1990266	neutrophil migration	16/240	122/18866	3.54731e-12	2.40486e-10	1.62303e-10	CCL18/CCL19/SLAMF8/FCER1G/C3AR1/ITGB2/C5AR1/CCL8/RAC2/S100A9/CCL21/NCKAP1L/CXCL8/SYK/VAV1/CXCL2	16	GO
GO:0030593	neutrophil chemotaxis	15/240	103/18866	3.60802e-12	2.40486e-10	1.62303e-10	CCL18/CCL19/FCER1G/C3AR1/ITGB2/C5AR1/CCL8/RAC2/S100A9/CCL21/NCKAP1L/CXCL8/SYK/VAV1/CXCL2	15	GO
GO:0050870	positive regulation of T cell activation	20/240	214/18866	4.18497e-12	2.73362e-10	1.84491e-10	CCL19/TNFSF13B/HLA-DMB/CORO1A/CD86/CD83/IL7R/PTPRC/AIF1/LYN/CCL21/PTPN6/LGALS9/NCKAP1L/LILRB2/SYK/VAV1/LILRB1/DOCK8/VNN1	20	GO
GO:0043304	regulation of mast cell degranulation	10/240	32/18866	4.64492e-12	2.97457e-10	2.00752e-10	VAMP8/FCER1G/RAC2/HMOX1/LYN/FGR/LGALS9/SYK/CD84/CD300A	10	GO
GO:0042113	B cell activation	24/240	328/18866	5.54942e-12	3.48546e-10	2.35233e-10	FCGR2B/TNFSF13B/TYROBP/SLAMF8/TNFAIP3/GPR183/CD86/IL7R/PTPRC/BLNK/MNDA/LYN/CD180/IGKC/PTPN6/NCKAP1L/TNFRSF21/SYK/BTK/SAMSN1/MZB1/ITGA4/CD300A/CMTM7	24	GO
GO:0033006	regulation of mast cell activation involved in immune response	10/240	33/18866	6.59062e-12	3.94975e-10	2.66567e-10	VAMP8/FCER1G/RAC2/HMOX1/LYN/FGR/LGALS9/SYK/CD84/CD300A	10	GO
GO:0071621	granulocyte chemotaxis	16/240	127/18866	6.65144e-12	3.94975e-10	2.66567e-10	CCL18/CCL19/FCER1G/C3AR1/ITGB2/C5AR1/CSF1R/CCL8/RAC2/S100A9/CCL21/NCKAP1L/CXCL8/SYK/VAV1/CXCL2	16	GO
GO:0001906	cell killing	18/240	172/18866	7.63486e-12	4.45276e-10	3.00515e-10	FCGR2B/TYROBP/ITGAM/P2RX7/CTSC/LYZ/CORO1A/IL7R/PTPRC/PTPN6/LGALS9/ARRB2/CTSH/SYK/VAV1/LILRB1/ICAM1/SLAMF7	18	GO
GO:0045785	positive regulation of cell adhesion	27/240	428/18866	7.86907e-12	4.50884e-10	3.043e-10	CCL19/TNFSF13B/HLA-DMB/ITGB2/CORO1A/CD86/CD83/IL7R/PTPRC/AIF1/LYN/PLAUR/CCL21/PTPN6/LGALS9/CD36/ALOX5/NCKAP1L/SFRP2/LILRB2/SYK/VAV1/LILRB1/ICAM1/DOCK8/ITGA4/VNN1	27	GO
GO:0043303	mast cell degranulation	11/240	47/18866	1.30658e-11	7.35739e-10	4.96548e-10	VAMP8/FCER1G/RAC2/HMOX1/LYN/FGR/LGALS9/SYK/BTK/CD84/CD300A	11	GO
GO:0150076	neuroinflammatory response	13/240	77/18866	1.47521e-11	8.16616e-10	5.51131e-10	MMP9/TYROBP/ITGAM/C1QA/ITGB2/C5AR1/CTSC/TREM2/PTPRC/AIF1/TNFRSF1B/GRN/TLR8	13	GO
GO:0002279	mast cell activation involved in immune response	11/240	48/18866	1.67617e-11	8.8628e-10	5.98147e-10	VAMP8/FCER1G/RAC2/HMOX1/LYN/FGR/LGALS9/SYK/BTK/CD84/CD300A	11	GO
GO:0030888	regulation of B cell proliferation	12/240	62/18866	1.68018e-11	8.8628e-10	5.98147e-10	FCGR2B/TNFSF13B/TYROBP/GPR183/PTPRC/MNDA/LYN/NCKAP1L/TNFRSF21/BTK/MZB1/CD300A	12	GO
GO:0006959	humoral immune response	25/240	377/18866	1.68247e-11	8.8628e-10	5.98147e-10	FCGR2B/C1QB/C1QC/C3AR1/RNASE6/C1QA/VSIG4/TREM1/C5AR1/CFI/LYZ/GPR183/CD83/S100A9/TREM2/PTPRC/BLNK/IGKC/PTPN6/ALOX5/C7/CXCL8/TNFRSF21/CXCL2/C2	25	GO
GO:0099024	plasma membrane invagination	16/240	135/18866	1.71676e-11	8.89992e-10	6.00652e-10	FCGR2B/FCER1G/ITGAM/ITGB2/MARCO/RAC2/TREM2/AIF1/IGKC/CD36/NCKAP1L/MSR1/ELMO1/CD300A/ABCA1/BIN2	16	GO
GO:0050672	negative regulation of lymphocyte proliferation	13/240	79/18866	2.07185e-11	1.05729e-09	7.13563e-10	FCGR2B/TYROBP/VSIG4/CD86/MNDA/LYN/PTPN6/LGALS9/TNFRSF21/LILRB2/LILRB1/BTK/CD300A	13	GO
GO:0001819	positive regulation of cytokine production	27/240	447/18866	2.13437e-11	1.05766e-09	7.13812e-10	CCL19/TYROBP/CD14/FCER1G/C3AR1/CLEC5A/LY96/C5AR1/P2RX7/CYP1B1/IRF8/CD86/CD83/TREM2/PTPRC/LPL/MNDA/AIF1/CASP1/FGR/LGALS9/CD36/TLR1/TLR8/LILRB2/SYK/LILRB1	27	GO
GO:0002448	mast cell mediated immunity	11/240	49/18866	2.13735e-11	1.05766e-09	7.13812e-10	VAMP8/FCER1G/RAC2/HMOX1/LYN/FGR/LGALS9/SYK/BTK/CD84/CD300A	11	GO
GO:0042100	B cell proliferation	14/240	97/18866	2.18158e-11	1.06344e-09	7.1771e-10	FCGR2B/TNFSF13B/TYROBP/GPR183/IL7R/PTPRC/MNDA/LYN/CD180/NCKAP1L/TNFRSF21/BTK/MZB1/CD300A	14	GO
GO:0032945	negative regulation of mononuclear cell proliferation	13/240	80/18866	2.44622e-11	1.1749e-09	7.92938e-10	FCGR2B/TYROBP/VSIG4/CD86/MNDA/LYN/PTPN6/LGALS9/TNFRSF21/LILRB2/LILRB1/BTK/CD300A	13	GO
GO:0001774	microglial cell activation	11/240	50/18866	2.70972e-11	1.26428e-09	8.53256e-10	TYROBP/ITGAM/C1QA/ITGB2/C5AR1/CTSC/TREM2/PTPRC/AIF1/GRN/TLR8	11	GO
GO:0002269	leukocyte activation involved in inflammatory response	11/240	50/18866	2.70972e-11	1.26428e-09	8.53256e-10	TYROBP/ITGAM/C1QA/ITGB2/C5AR1/CTSC/TREM2/PTPRC/AIF1/GRN/TLR8	11	GO
GO:0051251	positive regulation of lymphocyte activation	24/240	357/18866	3.29383e-11	1.51516e-09	1.02258e-09	CCL19/TNFSF13B/TYROBP/HLA-DMB/GPR183/CORO1A/CD86/CD83/IL7R/PTPRC/AIF1/LYN/IGKC/CCL21/PTPN6/LGALS9/NCKAP1L/LILRB2/SYK/VAV1/LILRB1/BTK/DOCK8/VNN1	24	GO
GO:0010324	membrane invagination	16/240	143/18866	4.15896e-11	1.88655e-09	1.27322e-09	FCGR2B/FCER1G/ITGAM/ITGB2/MARCO/RAC2/TREM2/AIF1/IGKC/CD36/NCKAP1L/MSR1/ELMO1/CD300A/ABCA1/BIN2	16	GO
GO:0042129	regulation of T cell proliferation	17/240	167/18866	4.62054e-11	2.04189e-09	1.37806e-09	CCL19/TNFSF13B/HLA-DMB/VSIG4/CORO1A/RAC2/CD86/PTPRC/AIF1/TNFRSF1B/PTPN6/LGALS9/NCKAP1L/TNFRSF21/LILRB2/SYK/LILRB1	17	GO
GO:0050921	positive regulation of chemotaxis	16/240	144/18866	4.62645e-11	2.04189e-09	1.37806e-09	CCL19/CXCR4/C3AR1/CCR1/C5AR1/PLA2G7/CSF1R/RAC2/LGMN/TREM2/AIF1/CCL21/LGALS9/NCKAP1L/CXCL8/TIAM1	16	GO
GO:0002688	regulation of leukocyte chemotaxis	15/240	124/18866	5.56543e-11	2.42356e-09	1.63565e-09	CCL19/SLAMF8/C3AR1/CCR1/C5AR1/PLA2G7/CSF1R/RAC2/LGMN/AIF1/LYN/CCL21/LGALS9/NCKAP1L/CXCL8	15	GO
GO:0036336	dendritic cell migration	9/240	29/18866	6.02701e-11	2.59003e-09	1.748e-09	CCL19/CXCR4/SLAMF8/CCR1/GPR183/CCL21/LGALS9/ALOX5/DOCK8	9	GO
GO:0030098	lymphocyte differentiation	24/240	368/18866	6.18151e-11	2.62192e-09	1.76952e-09	CCL19/FCGR2B/SLAMF8/FCER1G/GPR183/CD86/CD83/IL7R/MAFB/PTPRC/BLNK/PTPN6/LGALS9/CTSL/NCKAP1L/LILRB2/SYK/VAV1/BTK/ITGA4/VNN1/CMTM7/DOCK2/PRDM1	24	GO
GO:0050864	regulation of B cell activation	18/240	195/18866	6.31296e-11	2.64335e-09	1.78398e-09	FCGR2B/TNFSF13B/TYROBP/SLAMF8/TNFAIP3/GPR183/PTPRC/MNDA/LYN/IGKC/PTPN6/NCKAP1L/TNFRSF21/SYK/BTK/SAMSN1/MZB1/CD300A	18	GO
GO:0002460	adaptive immune response based on somatic recombination of immune receptors built from immunoglobulin superfamily domains	24/240	370/18866	6.91377e-11	2.85827e-09	1.92904e-09	CCL19/FCGR2B/TNFSF13B/C1QB/C1QC/FCER1G/C1QA/P2RX7/CFI/TNFAIP3/CTSC/IL7R/PTPRC/IGKC/TNFRSF1B/PTPN6/C7/CTSH/TLR8/LILRB1/BTK/C2/ICAM1/MYO1G	24	GO
GO:0032611	interleukin-1 beta production	14/240	106/18866	7.45238e-11	3.04243e-09	2.05333e-09	CCL19/ACP5/TYROBP/P2RX7/TNFAIP3/TREM2/LPL/MNDA/CASP1/LGALS9/ARRB2/CD36/TLR8/ABCA1	14	GO
GO:0033627	cell adhesion mediated by integrin	12/240	71/18866	9.00218e-11	3.62977e-09	2.44972e-09	ITGB2/CYP1B1/FERMT3/LYN/CCL21/PTPN6/PLAU/NCKAP1L/SFRP2/SYK/ICAM1/ITGA4	12	GO
GO:0002831	regulation of response to biotic stimulus	25/240	409/18866	9.62895e-11	3.79018e-09	2.55798e-09	MMP12/FCGR2B/SLAMF8/FCER1G/APOE/LY86/LY96/VSIG4/HCK/TNFAIP3/TREM2/MNDA/LYN/CD180/PTPN6/FGR/LGALS9/GRN/ARRB2/CD36/TLR8/SYK/VAV1/LILRB1/NR1H3	25	GO
GO:0071887	leukocyte apoptotic process	14/240	108/18866	9.63212e-11	3.79018e-09	2.55798e-09	CCL19/FCER1G/P2RX7/HCLS1/IL7R/LYN/CCL21/LGALS9/CTSL/GIMAP8/TNFRSF21/LILRB1/BTK/DOCK8	14	GO
GO:0050920	regulation of chemotaxis	19/240	229/18866	1.16654e-10	4.53563e-09	3.06108e-09	CCL19/CXCR4/SLAMF8/C3AR1/CCR1/C5AR1/PLA2G7/CSF1R/GPR183/RAC2/LGMN/TREM2/AIF1/LYN/CCL21/LGALS9/NCKAP1L/CXCL8/TIAM1	19	GO
GO:0051250	negative regulation of lymphocyte activation	16/240	154/18866	1.2828e-10	4.92895e-09	3.32653e-09	FCGR2B/TYROBP/VSIG4/TNFAIP3/CD86/MNDA/LYN/PTPN6/FGR/LGALS9/TNFRSF21/LILRB2/LILRB1/BTK/SAMSN1/CD300A	16	GO
GO:0033003	regulation of mast cell activation	10/240	44/18866	1.56304e-10	5.93593e-09	4.00613e-09	VAMP8/FCER1G/RAC2/HMOX1/LYN/FGR/LGALS9/SYK/CD84/CD300A	10	GO
GO:0050869	negative regulation of B cell activation	9/240	32/18866	1.63283e-10	6.12968e-09	4.1369e-09	FCGR2B/TYROBP/TNFAIP3/MNDA/LYN/TNFRSF21/BTK/SAMSN1/CD300A	9	GO
GO:0070371	ERK1 and ERK2 cascade	22/240	325/18866	1.98841e-10	7.37972e-09	4.98054e-09	CCL18/CCL19/APOE/CCR1/CHI3L1/C5AR1/MARCO/CSF1R/CCL8/GPR183/TREM2/PTPRC/LYN/CCL21/PTPN6/LGALS9/ARRB2/CD36/CTSH/SYK/ICAM1/TIAM1	22	GO
GO:0032675	regulation of interleukin-6 production	16/240	159/18866	2.07555e-10	7.53195e-09	5.08329e-09	TYROBP/FCER1G/P2RX7/TNFAIP3/TREM2/LPL/AIF1/PTPN6/LGALS9/ARRB2/CD36/TLR1/TLR8/NCKAP1L/LILRB2/SYK	16	GO
GO:1902107	positive regulation of leukocyte differentiation	16/240	159/18866	2.07555e-10	7.53195e-09	5.08329e-09	CCL19/TYROBP/EVI2B/CCR1/CD86/CD83/HCLS1/IL7R/TREM2/PTPRC/LGALS9/NCKAP1L/LILRB2/SYK/BTK/VNN1	16	GO
GO:0050727	regulation of inflammatory response	25/240	425/18866	2.16313e-10	7.7635e-09	5.23956e-09	ACP5/FCGR2B/MMP9/VAMP8/SLAMF8/FCER1G/APOE/HCK/PLA2G7/TNFAIP3/CTSC/PIK3AP1/S100A9/TREM2/PTPRC/LPL/LYN/TNFRSF1B/CASP1/GRN/ALOX5/CDH5/BTK/PLD3/NR1H3	25	GO
GO:0061900	glial cell activation	11/240	60/18866	2.22306e-10	7.89187e-09	5.32619e-09	TYROBP/ITGAM/C1QA/ITGB2/C5AR1/CTSC/TREM2/PTPRC/AIF1/GRN/TLR8	11	GO
GO:0002690	positive regulation of leukocyte chemotaxis	13/240	96/18866	2.61773e-10	9.19301e-09	6.20433e-09	CCL19/C3AR1/CCR1/C5AR1/PLA2G7/CSF1R/RAC2/LGMN/AIF1/CCL21/LGALS9/NCKAP1L/CXCL8	13	GO
GO:0045576	mast cell activation	11/240	61/18866	2.68199e-10	9.31849e-09	6.28901e-09	VAMP8/FCER1G/RAC2/HMOX1/LYN/FGR/LGALS9/SYK/BTK/CD84/CD300A	11	GO
GO:0050764	regulation of phagocytosis	13/240	97/18866	2.98909e-10	1.01691e-08	6.86311e-09	FCGR2B/FCER1G/HCK/TREM2/PTPRC/IL2RG/FGR/CD36/NCKAP1L/SYK/C2/CD300A/DOCK2	13	GO
GO:0071674	mononuclear cell migration	13/240	97/18866	2.98909e-10	1.01691e-08	6.86311e-09	CCL18/CCL19/SLAMF8/C3AR1/CCR1/C5AR1/PLA2G7/CSF1R/CCL8/LGMN/AIF1/LYN/CCL21	13	GO
GO:0070372	regulation of ERK1 and ERK2 cascade	21/240	306/18866	4.07304e-10	1.3714e-08	9.2555e-09	CCL18/CCL19/APOE/CCR1/CHI3L1/C5AR1/MARCO/CSF1R/CCL8/GPR183/TREM2/PTPRC/LYN/CCL21/PTPN6/LGALS9/ARRB2/CD36/SYK/ICAM1/TIAM1	21	GO
GO:0045088	regulation of innate immune response	21/240	307/18866	4.32328e-10	1.4408e-08	9.7239e-09	MMP12/FCGR2B/SLAMF8/FCER1G/APOE/VSIG4/HCK/TNFAIP3/TREM2/MNDA/LYN/PTPN6/FGR/LGALS9/GRN/ARRB2/TLR8/SYK/VAV1/LILRB1/NR1H3	21	GO
GO:0032612	interleukin-1 production	14/240	121/18866	4.50824e-10	1.48726e-08	1.00375e-08	CCL19/ACP5/TYROBP/P2RX7/TNFAIP3/TREM2/LPL/MNDA/CASP1/LGALS9/ARRB2/CD36/TLR8/ABCA1	14	GO
GO:0032635	interleukin-6 production	16/240	170/18866	5.63407e-10	1.84009e-08	1.24187e-08	TYROBP/FCER1G/P2RX7/TNFAIP3/TREM2/LPL/AIF1/PTPN6/LGALS9/ARRB2/CD36/TLR1/TLR8/NCKAP1L/LILRB2/SYK	16	GO
GO:0030889	negative regulation of B cell proliferation	7/240	17/18866	8.62089e-10	2.78771e-08	1.88141e-08	FCGR2B/TYROBP/MNDA/LYN/TNFRSF21/BTK/CD300A	7	GO
GO:2000106	regulation of leukocyte apoptotic process	12/240	86/18866	9.08733e-10	2.89077e-08	1.95097e-08	CCL19/FCER1G/P2RX7/HCLS1/IL7R/LYN/CCL21/LGALS9/GIMAP8/LILRB1/BTK/DOCK8	12	GO
GO:0002704	negative regulation of leukocyte mediated immunity	10/240	52/18866	9.11663e-10	2.89077e-08	1.95097e-08	FCGR2B/HMOX1/IL7R/PTPRC/PTPN6/LGALS9/ARRB2/LILRB1/CD84/CD300A	10	GO
GO:1903706	regulation of hemopoiesis	26/240	498/18866	1.19258e-09	3.74517e-08	2.5276e-08	CCL19/FCGR2B/C1QC/TYROBP/EVI2B/SLAMF8/CCR1/TMEM176A/CD86/CD83/HCLS1/IL7R/MAFB/TREM2/PTPRC/LYN/PTPN6/LGALS9/NCKAP1L/TMEM176B/LILRB2/SYK/LILRB1/BTK/VNN1/PRDM1	26	GO
GO:0031341	regulation of cell killing	12/240	92/18866	2.01615e-09	6.27117e-08	4.23239e-08	FCGR2B/TYROBP/ITGAM/P2RX7/IL7R/PTPRC/LGALS9/ARRB2/SYK/VAV1/LILRB1/ICAM1	12	GO
GO:0070374	positive regulation of ERK1 and ERK2 cascade	17/240	215/18866	2.39432e-09	7.37722e-08	4.97886e-08	CCL18/CCL19/APOE/CCR1/CHI3L1/C5AR1/MARCO/CSF1R/CCL8/GPR183/TREM2/PTPRC/CCL21/LGALS9/ARRB2/CD36/ICAM1	17	GO
GO:0001910	regulation of leukocyte mediated cytotoxicity	11/240	75/18866	2.68709e-09	8.12595e-08	5.48417e-08	FCGR2B/TYROBP/ITGAM/P2RX7/IL7R/PTPRC/LGALS9/ARRB2/VAV1/LILRB1/ICAM1	11	GO
GO:0032418	lysosome localization	11/240	75/18866	2.68709e-09	8.12595e-08	5.48417e-08	VAMP8/FCER1G/RAC2/HMOX1/LYN/FGR/LGALS9/SYK/BTK/CD84/CD300A	11	GO
GO:0097028	dendritic cell differentiation	9/240	44/18866	3.61381e-09	1.08282e-07	7.30789e-08	CCL19/FCGR2B/TMEM176A/TREM2/LYN/LGALS9/TMEM176B/LILRB2/LILRB1	9	GO
GO:0032651	regulation of interleukin-1 beta production	12/240	97/18866	3.74536e-09	1.11203e-07	7.50506e-08	CCL19/ACP5/TYROBP/P2RX7/TNFAIP3/TREM2/LPL/MNDA/CASP1/LGALS9/ARRB2/TLR8	12	GO
GO:1902563	regulation of neutrophil activation	6/240	13/18866	6.34179e-09	1.84931e-07	1.24809e-07	FCGR2B/ITGAM/ITGB2/GRN/SYK/CD300A	6	GO
GO:2001198	regulation of dendritic cell differentiation	6/240	13/18866	6.34179e-09	1.84931e-07	1.24809e-07	FCGR2B/TMEM176A/LGALS9/TMEM176B/LILRB2/LILRB1	6	GO
GO:0002698	negative regulation of immune effector process	13/240	124/18866	6.4973e-09	1.87789e-07	1.26738e-07	FCGR2B/SLAMF8/VSIG4/HMOX1/IL7R/PTPRC/PTPN6/LGALS9/GRN/ARRB2/LILRB1/CD84/CD300A	13	GO
GO:0034341	response to interferon-gamma	16/240	202/18866	6.98645e-09	2.00156e-07	1.35084e-07	CCL18/CCL19/HCK/CXCL16/MRC1/CCL8/IRF8/AIF1/CASP1/CCL21/LGALS9/KYNU/ICAM1/OAS1/NR1H3/IFITM1	16	GO
GO:0019882	antigen processing and presentation	17/240	232/18866	7.56952e-09	2.14974e-07	1.45085e-07	CCL19/FCGR2B/VAMP8/CTSS/FCER1G/NCF2/HLA-DMA/HLA-DMB/LGMN/TREM2/CCL21/NCF4/CD36/CTSH/CTSL/LILRB2/ICAM1	17	GO
GO:0070665	positive regulation of leukocyte proliferation	14/240	150/18866	7.69856e-09	2.16754e-07	1.46287e-07	CCL19/TNFSF13B/HLA-DMB/CSF1R/GPR183/CORO1A/CD86/PTPRC/AIF1/LYN/LGALS9/NCKAP1L/LILRB2/SYK	14	GO
GO:1903708	positive regulation of hemopoiesis	16/240	204/18866	8.04644e-09	2.24613e-07	1.5159e-07	CCL19/TYROBP/EVI2B/CCR1/CD86/CD83/HCLS1/IL7R/TREM2/PTPRC/LGALS9/NCKAP1L/LILRB2/SYK/BTK/VNN1	16	GO
GO:0033628	regulation of cell adhesion mediated by integrin	9/240	48/18866	8.17922e-09	2.26384e-07	1.52786e-07	CYP1B1/FERMT3/LYN/CCL21/PTPN6/PLAU/NCKAP1L/SFRP2/SYK	9	GO
GO:0002888	positive regulation of myeloid leukocyte mediated immunity	8/240	34/18866	8.33108e-09	2.2865e-07	1.54315e-07	VAMP8/TYROBP/FCER1G/ITGAM/ITGB2/FGR/SYK/BTK	8	GO
GO:0002548	monocyte chemotaxis	10/240	67/18866	1.2095e-08	3.29185e-07	2.22165e-07	CCL18/CCL19/SLAMF8/CCR1/PLA2G7/CCL8/LGMN/AIF1/LYN/CCL21	10	GO
GO:0007229	integrin-mediated signaling pathway	12/240	108/18866	1.29529e-08	3.49621e-07	2.35958e-07	TYROBP/FCER1G/ITGAM/ITGB2/HCK/FERMT3/PLEK/FGR/SYK/VAV1/ITGAL/ITGA4	12	GO
GO:0002407	dendritic cell chemotaxis	7/240	24/18866	1.42199e-08	3.80673e-07	2.56915e-07	CCL19/CXCR4/SLAMF8/CCR1/GPR183/CCL21/LGALS9	7	GO
GO:0071675	regulation of mononuclear cell migration	9/240	51/18866	1.43533e-08	3.8112e-07	2.57216e-07	SLAMF8/C3AR1/CCR1/C5AR1/PLA2G7/CSF1R/LGMN/AIF1/LYN	9	GO
GO:0032755	positive regulation of interleukin-6 production	11/240	88/18866	1.51852e-08	3.99957e-07	2.6993e-07	TYROBP/FCER1G/P2RX7/LPL/AIF1/LGALS9/CD36/TLR1/TLR8/LILRB2/SYK	11	GO
GO:0032680	regulation of tumor necrosis factor production	12/240	110/18866	1.59757e-08	4.17413e-07	2.81711e-07	CCL19/ACP5/CD14/FCER1G/LY96/TNFAIP3/TREM2/PTPRC/PTPN6/LGALS9/ARRB2/CD36	12	GO
GO:0002920	regulation of humoral immune response	13/240	134/18866	1.67368e-08	4.33828e-07	2.92789e-07	FCGR2B/C1QB/C1QC/C3AR1/C1QA/VSIG4/C5AR1/CFI/PTPRC/IGKC/PTPN6/C7/C2	13	GO
GO:0097242	amyloid-beta clearance	8/240	37/18866	1.71421e-08	4.40836e-07	2.97518e-07	APOE/ITGAM/ITGB2/C5AR1/MARCO/TREM2/CD36/MSR1	8	GO
GO:0032652	regulation of interleukin-1 production	12/240	111/18866	1.77127e-08	4.5195e-07	3.05019e-07	CCL19/ACP5/TYROBP/P2RX7/TNFAIP3/TREM2/LPL/MNDA/CASP1/LGALS9/ARRB2/TLR8	12	GO
GO:1903555	regulation of tumor necrosis factor superfamily cytokine production	12/240	113/18866	2.17036e-08	5.49488e-07	3.70847e-07	CCL19/ACP5/CD14/FCER1G/LY96/TNFAIP3/TREM2/PTPRC/PTPN6/LGALS9/ARRB2/CD36	12	GO
GO:0090023	positive regulation of neutrophil chemotaxis	7/240	26/18866	2.64462e-08	6.6441e-07	4.48408e-07	CCL19/C3AR1/C5AR1/RAC2/CCL21/NCKAP1L/CXCL8	7	GO
GO:0030217	T cell differentiation	17/240	253/18866	2.74321e-08	6.83918e-07	4.61573e-07	CCL19/FCER1G/GPR183/CD86/CD83/IL7R/MAFB/PTPRC/LGALS9/CTSL/NCKAP1L/LILRB2/SYK/VAV1/VNN1/DOCK2/PRDM1	17	GO
GO:0032655	regulation of interleukin-12 production	9/240	55/18866	2.87008e-08	7.10127e-07	4.79262e-07	CCL19/ACP5/IRF8/LGALS9/ARRB2/CD36/TLR8/SYK/LILRB1	9	GO
GO:0032640	tumor necrosis factor production	12/240	116/18866	2.921e-08	7.17293e-07	4.84098e-07	CCL19/ACP5/CD14/FCER1G/LY96/TNFAIP3/TREM2/PTPRC/PTPN6/LGALS9/ARRB2/CD36	12	GO
GO:0072676	lymphocyte migration	12/240	117/18866	3.21859e-08	7.84471e-07	5.29436e-07	CCL18/CCL19/CXCL16/CCL8/GPR183/AIF1/CCL21/ICAM1/ITGAL/MYO1G/DOCK8/ITGA4	12	GO
GO:0002819	regulation of adaptive immune response	14/240	168/18866	3.2925e-08	7.93472e-07	5.35511e-07	CCL19/FCGR2B/TNFSF13B/FCER1G/P2RX7/TNFAIP3/IL7R/PTPRC/TNFRSF1B/PTPN6/CD48/LILRB1/BTK/SAMSN1	14	GO
GO:0034142	toll-like receptor 4 signaling pathway	8/240	40/18866	3.30411e-08	7.93472e-07	5.35511e-07	CD14/ITGAM/LY96/ITGB2/TNFAIP3/PIK3AP1/LYN/NR1H3	8	GO
GO:0038094	Fc-gamma receptor signaling pathway	13/240	142/18866	3.3669e-08	8.0265e-07	5.41705e-07	FCGR2B/FCER1G/HCK/PTPRC/LYN/IGKC/FGR/NCKAP1L/SYK/VAV1/FCGR2A/ELMO1/MYO1G	13	GO
GO:0071706	tumor necrosis factor superfamily cytokine production	12/240	119/18866	3.89654e-08	9.22181e-07	6.22376e-07	CCL19/ACP5/CD14/FCER1G/LY96/TNFAIP3/TREM2/PTPRC/PTPN6/LGALS9/ARRB2/CD36	12	GO
GO:0032615	interleukin-12 production	9/240	57/18866	3.97209e-08	9.33299e-07	6.2988e-07	CCL19/ACP5/IRF8/LGALS9/ARRB2/CD36/TLR8/SYK/LILRB1	9	GO
GO:0002431	Fc receptor mediated stimulatory signaling pathway	13/240	145/18866	4.32402e-08	1.00873e-06	6.80789e-07	FCGR2B/FCER1G/HCK/PTPRC/LYN/IGKC/FGR/NCKAP1L/SYK/VAV1/FCGR2A/ELMO1/MYO1G	13	GO
GO:0046631	alpha-beta T cell activation	13/240	146/18866	4.6937e-08	1.08721e-06	7.33752e-07	CCL19/GPR183/CD86/CD83/PTPRC/LGALS9/CTSL/NCKAP1L/SYK/LILRB1/CD300A/DOCK2/PRDM1	13	GO
GO:1902622	regulation of neutrophil migration	8/240	42/18866	4.96105e-08	1.14104e-06	7.70084e-07	CCL19/SLAMF8/C3AR1/C5AR1/RAC2/CCL21/NCKAP1L/CXCL8	8	GO
GO:0044409	entry into host	13/240	147/18866	5.0916e-08	1.16288e-06	7.84823e-07	VAMP8/CXCR4/CLEC5A/CTSB/MRC1/CD86/SIGLEC1/LGALS9/CTSL/CXCL8/ICAM1/SELPLG/IFITM1	13	GO
GO:0050707	regulation of cytokine secretion	9/240	59/18866	5.42671e-08	1.23081e-06	8.30668e-07	FCGR2B/CD14/CLEC5A/P2RX7/LYN/FGR/TLR1/TLR8/SYK	9	GO
GO:0002429	immune response-activating cell surface receptor signaling pathway	23/240	481/18866	5.75614e-08	1.28764e-06	8.69023e-07	FCGR2B/FCER1G/C3AR1/HCK/C5AR1/FPR3/THEMIS2/PTPRC/BLNK/MNDA/LYN/IGKC/PTPN6/FGR/NCKAP1L/TNFRSF21/SYK/VAV1/FCGR2A/ELMO1/BTK/MYO1G/CD300A	23	GO
GO:0002757	immune response-activating signal transduction	23/240	481/18866	5.75614e-08	1.28764e-06	8.69023e-07	FCGR2B/FCER1G/C3AR1/HCK/C5AR1/FPR3/THEMIS2/PTPRC/BLNK/MNDA/LYN/IGKC/PTPN6/FGR/NCKAP1L/TNFRSF21/SYK/VAV1/FCGR2A/ELMO1/BTK/MYO1G/CD300A	23	GO
GO:0071624	positive regulation of granulocyte chemotaxis	7/240	29/18866	6.07417e-08	1.34954e-06	9.10799e-07	CCL19/C3AR1/C5AR1/RAC2/CCL21/NCKAP1L/CXCL8	7	GO
GO:0032653	regulation of interleukin-10 production	9/240	60/18866	6.31422e-08	1.3934e-06	9.40397e-07	FCGR2B/TYROBP/FCER1G/CD83/TREM2/LGALS9/TNFRSF21/SYK/LILRB1	9	GO
GO:0042102	positive regulation of T cell proliferation	11/240	101/18866	6.52229e-08	1.42965e-06	9.64866e-07	CCL19/TNFSF13B/HLA-DMB/CORO1A/CD86/PTPRC/AIF1/LGALS9/NCKAP1L/LILRB2/SYK	11	GO
GO:0002291	T cell activation via T cell receptor contact with antigen bound to MHC molecule on antigen presenting cell	5/240	10/18866	7.64584e-08	1.65373e-06	1.1161e-06	HLA-DMB/LGALS9/LILRB1/ICAM1/ITGAL	5	GO
GO:0002887	negative regulation of myeloid leukocyte mediated immunity	5/240	10/18866	7.64584e-08	1.65373e-06	1.1161e-06	FCGR2B/HMOX1/LGALS9/CD84/CD300A	5	GO
GO:0002573	myeloid leukocyte differentiation	15/240	210/18866	8.27583e-08	1.76659e-06	1.19227e-06	CCL19/MMP9/C1QC/TYROBP/EVI2B/FCER1G/CCR1/SNX10/CSF1R/GPR183/HCLS1/MAFB/TREM2/LYN/LILRB1	15	GO
GO:0030100	regulation of endocytosis	15/240	210/18866	8.27583e-08	1.76659e-06	1.19227e-06	CCL19/CD14/APOE/APOC1/TREM2/CCL21/DAB2/ARRB2/CD36/NCKAP1L/SYK/LILRB1/NR1H3/CD300A/MCTP1	15	GO
GO:0045619	regulation of lymphocyte differentiation	14/240	181/18866	8.41522e-08	1.78468e-06	1.20447e-06	CCL19/SLAMF8/CD86/CD83/IL7R/PTPRC/PTPN6/LGALS9/NCKAP1L/LILRB2/SYK/BTK/VNN1/PRDM1	14	GO
GO:0045824	negative regulation of innate immune response	9/240	62/18866	8.47555e-08	1.78588e-06	1.20528e-06	MMP12/SLAMF8/VSIG4/TNFAIP3/LGALS9/GRN/ARRB2/LILRB1/NR1H3	9	GO
GO:0045621	positive regulation of lymphocyte differentiation	11/240	105/18866	9.77768e-08	2.03439e-06	1.373e-06	CCL19/CD86/CD83/IL7R/PTPRC/LGALS9/NCKAP1L/LILRB2/SYK/BTK/VNN1	11	GO
GO:0032613	interleukin-10 production	9/240	63/18866	9.77953e-08	2.03439e-06	1.373e-06	FCGR2B/TYROBP/FCER1G/CD83/TREM2/LGALS9/TNFRSF21/SYK/LILRB1	9	GO
GO:1902624	positive regulation of neutrophil migration	7/240	31/18866	1.00142e-07	2.07003e-06	1.39706e-06	CCL19/C3AR1/C5AR1/RAC2/CCL21/NCKAP1L/CXCL8	7	GO
GO:0045453	bone resorption	9/240	64/18866	1.12548e-07	2.31184e-06	1.56025e-06	SPP1/ACP5/P2RX7/SNX10/CSF1R/TNFAIP3/RAC2/SYK/CTSK	9	GO
GO:0002285	lymphocyte activation involved in immune response	14/240	187/18866	1.26309e-07	2.57828e-06	1.74007e-06	CCL19/FCGR2B/FCER1G/HLA-DMB/LCP1/GPR183/CORO1A/CD86/PTPRC/CD180/LGALS9/LILRB1/ICAM1/ITGAL	14	GO
GO:0001911	negative regulation of leukocyte mediated cytotoxicity	6/240	20/18866	1.32933e-07	2.69665e-06	1.81996e-06	FCGR2B/IL7R/PTPRC/LGALS9/ARRB2/LILRB1	6	GO
GO:0097048	dendritic cell apoptotic process	5/240	11/18866	1.3872e-07	2.76256e-06	1.86444e-06	CCL19/LYN/CCL21/LGALS9/LILRB1	5	GO
GO:0098883	synapse pruning	5/240	11/18866	1.3872e-07	2.76256e-06	1.86444e-06	C1QB/C1QC/ITGAM/C1QA/TREM2	5	GO
GO:2000668	regulation of dendritic cell apoptotic process	5/240	11/18866	1.3872e-07	2.76256e-06	1.86444e-06	CCL19/LYN/CCL21/LGALS9/LILRB1	5	GO
GO:0002286	T cell activation involved in immune response	11/240	109/18866	1.44013e-07	2.85059e-06	1.92385e-06	CCL19/FCGR2B/FCER1G/HLA-DMB/LCP1/GPR183/CD86/LGALS9/LILRB1/ICAM1/ITGAL	11	GO
GO:0046718	viral entry into host cell	12/240	134/18866	1.46277e-07	2.87795e-06	1.94232e-06	VAMP8/CXCR4/CLEC5A/CTSB/MRC1/CD86/SIGLEC1/LGALS9/CTSL/ICAM1/SELPLG/IFITM1	12	GO
GO:0055074	calcium ion homeostasis	22/240	468/18866	1.52371e-07	2.97991e-06	2.01113e-06	CCL19/CXCR4/CD52/APOE/C3AR1/CCR1/C5AR1/P2RX7/SNX10/FPR3/CCL8/CORO1A/PTPRC/LYN/CCL21/PTPN6/CEMIP/CD36/CDH5/GPR65/GNA15/FAM20A	22	GO
GO:0090022	regulation of neutrophil chemotaxis	7/240	33/18866	1.59205e-07	3.09503e-06	2.08882e-06	CCL19/C3AR1/C5AR1/RAC2/CCL21/NCKAP1L/CXCL8	7	GO
GO:1903305	regulation of regulated secretory pathway	13/240	162/18866	1.60289e-07	3.09765e-06	2.09059e-06	FCGR2B/VAMP8/FCER1G/ITGAM/ITGB2/RAC2/HMOX1/LYN/FGR/LGALS9/SYK/CD84/CD300A	13	GO
GO:0072678	T cell migration	9/240	67/18866	1.69041e-07	3.24758e-06	2.19178e-06	CXCL16/GPR183/AIF1/CCL21/ICAM1/ITGAL/MYO1G/DOCK8/ITGA4	9	GO
GO:0050671	positive regulation of lymphocyte proliferation	12/240	136/18866	1.72187e-07	3.28867e-06	2.21951e-06	CCL19/TNFSF13B/HLA-DMB/GPR183/CORO1A/CD86/PTPRC/AIF1/LGALS9/NCKAP1L/LILRB2/SYK	12	GO
GO:0072593	reactive oxygen species metabolic process	17/240	288/18866	1.79175e-07	3.40225e-06	2.29616e-06	ACP5/TYROBP/NCF2/ITGAM/ITGB2/P2RX7/CYP1B1/HK2/RAC2/AIF1/NCF4/CD36/ALOX5/SYK/VAV1/ICAM1/GLA	17	GO
GO:0032946	positive regulation of mononuclear cell proliferation	12/240	137/18866	1.86617e-07	3.52307e-06	2.37771e-06	CCL19/TNFSF13B/HLA-DMB/GPR183/CORO1A/CD86/PTPRC/AIF1/LGALS9/NCKAP1L/LILRB2/SYK	12	GO
GO:0050766	positive regulation of phagocytosis	9/240	68/18866	1.92688e-07	3.61678e-06	2.44095e-06	FCGR2B/FCER1G/TREM2/PTPRC/IL2RG/CD36/NCKAP1L/C2/DOCK2	9	GO
GO:0055094	response to lipoprotein particle	7/240	34/18866	1.98321e-07	3.70123e-06	2.49795e-06	FCER1G/APOE/ITGB2/LPL/CD36/SYK/ABCA1	7	GO
GO:0002433	immune response-regulating cell surface receptor signaling pathway involved in phagocytosis	12/240	139/18866	2.18752e-07	4.0364e-06	2.72415e-06	FCGR2B/HCK/PTPRC/LYN/IGKC/FGR/NCKAP1L/SYK/VAV1/FCGR2A/ELMO1/MYO1G	12	GO
GO:0038096	Fc-gamma receptor signaling pathway involved in phagocytosis	12/240	139/18866	2.18752e-07	4.0364e-06	2.72415e-06	FCGR2B/HCK/PTPRC/LYN/IGKC/FGR/NCKAP1L/SYK/VAV1/FCGR2A/ELMO1/MYO1G	12	GO
GO:0043301	negative regulation of leukocyte degranulation	5/240	12/18866	2.35341e-07	4.31811e-06	2.91427e-06	FCGR2B/HMOX1/LGALS9/CD84/CD300A	5	GO
GO:0052126	movement in host environment	13/240	169/18866	2.62277e-07	4.78546e-06	3.22969e-06	VAMP8/CXCR4/CLEC5A/CTSB/MRC1/CD86/SIGLEC1/LGALS9/CTSL/CXCL8/ICAM1/SELPLG/IFITM1	13	GO
GO:0045582	positive regulation of T cell differentiation	10/240	92/18866	2.66377e-07	4.83326e-06	3.26195e-06	CCL19/CD86/CD83/IL7R/PTPRC/LGALS9/NCKAP1L/LILRB2/SYK/VNN1	10	GO
GO:0071622	regulation of granulocyte chemotaxis	8/240	52/18866	2.83486e-07	5.11528e-06	3.45229e-06	CCL19/C3AR1/C5AR1/CSF1R/RAC2/CCL21/NCKAP1L/CXCL8	8	GO
GO:0002532	production of molecular mediator involved in inflammatory response	10/240	93/18866	2.95175e-07	5.29693e-06	3.57488e-06	VAMP8/SLAMF8/FCER1G/LYN/GRN/CD36/ALOX5/SYK/BTK/PLD3	10	GO
GO:0002755	MyD88-dependent toll-like receptor signaling pathway	7/240	36/18866	3.01145e-07	5.34533e-06	3.60754e-06	CD14/LY96/CD36/TLR1/TLR8/BTK/CD300A	7	GO
GO:0071402	cellular response to lipoprotein particle stimulus	7/240	36/18866	3.01145e-07	5.34533e-06	3.60754e-06	FCER1G/APOE/ITGB2/LPL/CD36/SYK/ABCA1	7	GO
GO:0050663	cytokine secretion	9/240	72/18866	3.18423e-07	5.62145e-06	3.7939e-06	FCGR2B/CD14/CLEC5A/P2RX7/LYN/FGR/TLR1/TLR8/SYK	9	GO
GO:1905954	positive regulation of lipid localization	10/240	94/18866	3.26668e-07	5.73601e-06	3.87121e-06	SPP1/APOE/PLTP/P2RX7/LPL/CD36/MSR1/ACSL5/NR1H3/ABCA1	10	GO
GO:0032731	positive regulation of interleukin-1 beta production	8/240	53/18866	3.30248e-07	5.76787e-06	3.89271e-06	CCL19/TYROBP/P2RX7/LPL/MNDA/CASP1/LGALS9/TLR8	8	GO
GO:0071404	cellular response to low-density lipoprotein particle stimulus	6/240	23/18866	3.35314e-07	5.82519e-06	3.9314e-06	FCER1G/ITGB2/LPL/CD36/SYK/ABCA1	6	GO
GO:0045730	respiratory burst	7/240	37/18866	3.67413e-07	6.34905e-06	4.28495e-06	CD52/SLAMF8/NCF2/HCK/RAC2/NCF4/GRN	7	GO
GO:0031348	negative regulation of defense response	16/240	269/18866	3.75292e-07	6.45106e-06	4.3538e-06	MMP12/ACP5/FCGR2B/SLAMF8/APOE/VSIG4/TNFAIP3/PTPRC/TNFRSF1B/LGALS9/GRN/ARRB2/ALOX5/CDH5/LILRB1/NR1H3	16	GO
GO:0006968	cellular defense response	8/240	54/18866	3.83462e-07	6.55699e-06	4.42529e-06	TYROBP/CLEC5A/NCF2/LY96/C5AR1/MNDA/LSP1/LILRB2	8	GO
GO:0034121	regulation of toll-like receptor signaling pathway	9/240	74/18866	4.04464e-07	6.8801e-06	4.64335e-06	CD14/LY96/TNFAIP3/LYN/ARRB2/CD36/TLR1/NR1H3/CD300A	9	GO
GO:0046634	regulation of alpha-beta T cell activation	10/240	97/18866	4.39515e-07	7.3613e-06	4.96812e-06	CCL19/CD86/CD83/PTPRC/LGALS9/NCKAP1L/SYK/LILRB1/CD300A/PRDM1	10	GO
GO:1990868	response to chemokine	10/240	97/18866	4.39515e-07	7.3613e-06	4.96812e-06	CCL18/CCL19/CXCR4/CCR1/CCL8/TREM2/CCL21/CXCL8/CXCL2/DOCK8	10	GO
GO:1990869	cellular response to chemokine	10/240	97/18866	4.39515e-07	7.3613e-06	4.96812e-06	CCL18/CCL19/CXCR4/CCR1/CCL8/TREM2/CCL21/CXCL8/CXCL2/DOCK8	10	GO
GO:0031342	negative regulation of cell killing	6/240	24/18866	4.42345e-07	7.37092e-06	4.9746e-06	FCGR2B/IL7R/PTPRC/LGALS9/ARRB2/LILRB1	6	GO
GO:1904645	response to amyloid-beta	8/240	56/18866	5.12184e-07	8.49134e-06	5.73077e-06	MMP12/FCGR2B/MMP9/LGMN/TREM2/CD36/ICAM1/ITGA4	8	GO
GO:0007599	hemostasis	18/240	348/18866	5.45824e-07	9.00334e-06	6.07632e-06	FCER1G/APOE/F13A1/P2RX7/MMRN1/FERMT3/PLEK/LYN/PLAUR/PTPN6/ARRB2/CD36/PLAU/SYK/VAV1/GNA15/ZNF385A/DOCK8	18	GO
GO:0043302	positive regulation of leukocyte degranulation	6/240	25/18866	5.75864e-07	9.45111e-06	6.37852e-06	VAMP8/FCER1G/ITGAM/ITGB2/FGR/SYK	6	GO
GO:0045807	positive regulation of endocytosis	10/240	100/18866	5.85139e-07	9.55531e-06	6.44884e-06	CCL19/CD14/APOE/TREM2/CCL21/DAB2/ARRB2/CD36/NCKAP1L/SYK	10	GO
GO:0071346	cellular response to interferon-gamma	13/240	182/18866	6.15019e-07	9.99329e-06	6.74443e-06	CCL18/CCL19/HCK/MRC1/CCL8/IRF8/AIF1/CASP1/CCL21/LGALS9/ICAM1/OAS1/NR1H3	13	GO
GO:0002822	regulation of adaptive immune response based on somatic recombination of immune receptors built from immunoglobulin superfamily domains	12/240	153/18866	6.19411e-07	1.00148e-05	6.75898e-06	CCL19/FCGR2B/TNFSF13B/FCER1G/P2RX7/TNFAIP3/IL7R/PTPRC/TNFRSF1B/PTPN6/LILRB1/BTK	12	GO
GO:1903034	regulation of response to wounding	13/240	183/18866	6.54669e-07	1.05327e-05	7.10851e-06	SPP1/CXCR4/FCER1G/APOE/TNFAIP3/PLEK/LYN/PLAUR/GRN/CD36/ALOX5/PLAU/SYK	13	GO
GO:0002706	regulation of lymphocyte mediated immunity	12/240	154/18866	6.64285e-07	1.06351e-05	7.17757e-06	FCGR2B/FCER1G/P2RX7/IL7R/PTPRC/TNFRSF1B/PTPN6/LGALS9/ARRB2/VAV1/LILRB1/BTK	12	GO
GO:0030099	myeloid cell differentiation	20/240	431/18866	7.02054e-07	1.11849e-05	7.54865e-06	CCL19/MMP9/C1QC/TYROBP/EVI2B/FCER1G/CLEC5A/CCR1/SNX10/CSF1R/IRF8/GPR183/HCLS1/MAFB/TREM2/LYN/PTPN6/NCKAP1L/LILRB1/ZNF385A	20	GO
GO:0090025	regulation of monocyte chemotaxis	6/240	26/18866	7.40689e-07	1.17432e-05	7.92541e-06	SLAMF8/CCR1/PLA2G7/LGMN/AIF1/LYN	6	GO
GO:0032102	negative regulation of response to external stimulus	20/240	433/18866	7.54589e-07	1.19057e-05	8.03514e-06	MMP12/SPP1/ACP5/FCGR2B/SLAMF8/APOE/VSIG4/TNFAIP3/PTPRC/AIF1/TNFRSF1B/PLAUR/LGALS9/GRN/ARRB2/ALOX5/PLAU/CDH5/LILRB1/NR1H3	20	GO
GO:0031663	lipopolysaccharide-mediated signaling pathway	8/240	59/18866	7.73726e-07	1.2149e-05	8.1993e-06	CD14/LY86/LY96/HCK/TNFAIP3/LYN/CD180/CD36	8	GO
GO:0002456	T cell mediated immunity	10/240	104/18866	8.43984e-07	1.31888e-05	8.90104e-06	FCGR2B/P2RX7/CTSC/IL7R/PTPRC/TNFRSF1B/CTSH/LILRB1/ICAM1/MYO1G	10	GO
GO:0007204	positive regulation of cytosolic calcium ion concentration	17/240	322/18866	8.57679e-07	1.33389e-05	9.0024e-06	CCL19/CXCR4/CD52/C3AR1/CCR1/C5AR1/P2RX7/FPR3/CORO1A/PTPRC/LYN/CCL21/PTPN6/CEMIP/CD36/GPR65/GNA15	17	GO
GO:0032732	positive regulation of interleukin-1 production	8/240	60/18866	8.83047e-07	1.36684e-05	9.22474e-06	CCL19/TYROBP/P2RX7/LPL/MNDA/CASP1/LGALS9/TLR8	8	GO
GO:0001818	negative regulation of cytokine production	18/240	360/18866	8.91135e-07	1.37285e-05	9.26533e-06	ACP5/FCGR2B/TYROBP/VSIG4/TNFAIP3/CD83/HMOX1/TREM2/PTPRC/PTPN6/LGALS9/ARRB2/TLR8/NCKAP1L/TNFRSF21/LILRB1/BTK/CD84	18	GO
GO:0002707	negative regulation of lymphocyte mediated immunity	7/240	42/18866	9.12055e-07	1.39848e-05	9.43831e-06	FCGR2B/IL7R/PTPRC/PTPN6/LGALS9/ARRB2/LILRB1	7	GO
GO:0097006	regulation of plasma lipoprotein particle levels	10/240	105/18866	9.22532e-07	1.40794e-05	9.50212e-06	APOE/PLTP/APOC1/LIPA/PLA2G7/HMOX1/LPL/CD36/MSR1/ABCA1	10	GO
GO:0048872	homeostasis of number of cells	15/240	256/18866	1.05718e-06	1.60593e-05	1.08383e-05	TNFSF13B/FCER1G/P2RX7/AMPD3/LIPA/TNFAIP3/GPR183/CORO1A/HCLS1/HMOX1/IL7R/MAFB/LYN/LGALS9/NCKAP1L	15	GO
GO:0050853	B cell receptor signaling pathway	11/240	135/18866	1.25696e-06	1.90056e-05	1.28268e-05	FCGR2B/PTPRC/BLNK/MNDA/LYN/IGKC/PTPN6/NCKAP1L/SYK/BTK/CD300A	11	GO
GO:0001913	T cell mediated cytotoxicity	7/240	44/18866	1.26777e-06	1.90809e-05	1.28776e-05	FCGR2B/P2RX7/CTSC/IL7R/PTPRC/CTSH/LILRB1	7	GO
GO:0001894	tissue homeostasis	15/240	261/18866	1.34674e-06	2.01764e-05	1.3617e-05	SPP1/ACP5/P2RX7/LIPA/SNX10/CSF1R/TNFAIP3/LYZ/CORO1A/RAC2/IGKC/CTSH/CDH5/SYK/CTSK	15	GO
GO:0072503	cellular divalent inorganic cation homeostasis	21/240	492/18866	1.41039e-06	2.10334e-05	1.41954e-05	CCL19/CXCR4/CD52/APOE/C3AR1/CCR1/C5AR1/P2RX7/FPR3/CCL8/CORO1A/S100A9/PTPRC/LYN/CCL21/PTPN6/CEMIP/CD36/CDH5/GPR65/GNA15	21	GO
GO:0030183	B cell differentiation	11/240	137/18866	1.45419e-06	2.15881e-05	1.45698e-05	FCGR2B/SLAMF8/GPR183/PTPRC/BLNK/PTPN6/NCKAP1L/SYK/BTK/ITGA4/CMTM7	11	GO
GO:0001776	leukocyte homeostasis	9/240	86/18866	1.47423e-06	2.17865e-05	1.47036e-05	TNFSF13B/FCER1G/P2RX7/TNFAIP3/GPR183/CORO1A/LYN/LGALS9/NCKAP1L	9	GO
GO:0018108	peptidyl-tyrosine phosphorylation	18/240	374/18866	1.53754e-06	2.26199e-05	1.52661e-05	ITGB2/HCK/CSF1R/HCLS1/TREM2/PTPRC/SLA/LYN/PTPN6/FGR/ARRB2/CD36/SFRP2/SYK/BTK/ICAM1/SAMSN1/CD300A	18	GO
GO:0002705	positive regulation of leukocyte mediated immunity	11/240	138/18866	1.56264e-06	2.2886e-05	1.54457e-05	VAMP8/TYROBP/FCER1G/ITGAM/ITGB2/P2RX7/PTPRC/FGR/SYK/VAV1/BTK	11	GO
GO:0006874	cellular calcium ion homeostasis	20/240	456/18866	1.67735e-06	2.44564e-05	1.65055e-05	CCL19/CXCR4/CD52/APOE/C3AR1/CCR1/C5AR1/P2RX7/FPR3/CCL8/CORO1A/PTPRC/LYN/CCL21/PTPN6/CEMIP/CD36/CDH5/GPR65/GNA15	20	GO
GO:0018212	peptidyl-tyrosine modification	18/240	377/18866	1.72212e-06	2.49976e-05	1.68708e-05	ITGB2/HCK/CSF1R/HCLS1/TREM2/PTPRC/SLA/LYN/PTPN6/FGR/ARRB2/CD36/SFRP2/SYK/BTK/ICAM1/SAMSN1/CD300A	18	GO
GO:2000377	regulation of reactive oxygen species metabolic process	13/240	200/18866	1.7834e-06	2.57724e-05	1.73937e-05	ACP5/TYROBP/ITGAM/ITGB2/CYP1B1/HK2/RAC2/AIF1/CD36/ALOX5/SYK/ICAM1/GLA	13	GO
GO:0070098	chemokine-mediated signaling pathway	9/240	88/18866	1.79172e-06	2.57786e-05	1.73979e-05	CCL18/CCL19/CXCR4/CCR1/CCL8/TREM2/CCL21/CXCL8/CXCL2	9	GO
GO:0019058	viral life cycle	17/240	341/18866	1.88036e-06	2.69354e-05	1.81786e-05	VAMP8/CXCR4/APOE/CLEC5A/CTSB/MRC1/CCL8/CD86/SIGLEC1/LGALS9/IFI27/CTSL/CXCL8/ICAM1/SELPLG/OAS1/IFITM1	17	GO
GO:0030574	collagen catabolic process	7/240	47/18866	2.01424e-06	2.86572e-05	1.93406e-05	MMP12/MMP9/CTSS/CTSB/MMP7/CTSL/CTSK	7	GO
GO:1905952	regulation of lipid localization	12/240	171/18866	2.01811e-06	2.86572e-05	1.93406e-05	SPP1/APOE/PLTP/APOC1/P2RX7/LPL/CD36/MSR1/SYK/ACSL5/NR1H3/ABCA1	12	GO
GO:0007596	blood coagulation	17/240	343/18866	2.03554e-06	2.87795e-05	1.94232e-05	FCER1G/APOE/F13A1/P2RX7/MMRN1/FERMT3/PLEK/LYN/PLAUR/PTPN6/ARRB2/CD36/PLAU/SYK/VAV1/GNA15/DOCK8	17	GO
GO:0030449	regulation of complement activation	10/240	115/18866	2.13345e-06	3.00339e-05	2.02697e-05	C1QB/C1QC/C3AR1/C1QA/VSIG4/C5AR1/CFI/IGKC/C7/C2	10	GO
GO:0046849	bone remodeling	9/240	91/18866	2.37791e-06	3.32407e-05	2.2434e-05	SPP1/ACP5/P2RX7/SNX10/CSF1R/TNFAIP3/RAC2/SYK/CTSK	9	GO
GO:0010885	regulation of cholesterol storage	5/240	18/18866	2.39178e-06	3.32407e-05	2.2434e-05	LPL/CD36/MSR1/NR1H3/ABCA1	5	GO
GO:0043031	negative regulation of macrophage activation	5/240	18/18866	2.39178e-06	3.32407e-05	2.2434e-05	FCGR2B/VSIG4/PTPRC/GRN/NR1H3	5	GO
GO:0042742	defense response to bacterium	17/240	348/18866	2.4753e-06	3.42557e-05	2.3119e-05	ACP5/SLAMF8/FCER1G/RNASE6/MPEG1/C5AR1/P2RX7/LYZ/IRF8/S100A9/TREM2/IGKC/FGR/GRN/CD36/SYK/PLAC8	17	GO
GO:0050817	coagulation	17/240	349/18866	2.57291e-06	3.54562e-05	2.39293e-05	FCER1G/APOE/F13A1/P2RX7/MMRN1/FERMT3/PLEK/LYN/PLAUR/PTPN6/ARRB2/CD36/PLAU/SYK/VAV1/GNA15/DOCK8	17	GO
GO:0038093	Fc receptor signaling pathway	14/240	241/18866	2.69133e-06	3.67913e-05	2.48303e-05	FCGR2B/FCER1G/HCK/PTPRC/LYN/IGKC/FGR/NCKAP1L/SYK/VAV1/FCGR2A/ELMO1/BTK/MYO1G	14	GO
GO:2000107	negative regulation of leukocyte apoptotic process	7/240	49/18866	2.69232e-06	3.67913e-05	2.48303e-05	CCL19/FCER1G/HCLS1/IL7R/CCL21/LILRB1/DOCK8	7	GO
GO:0045766	positive regulation of angiogenesis	13/240	208/18866	2.75768e-06	3.75275e-05	2.53272e-05	CXCR4/C3AR1/ITGB2/CHI3L1/C5AR1/CYP1B1/HK2/HMOX1/GRN/CTSH/CDH5/CXCL8/SFRP2	13	GO
GO:0007015	actin filament organization	19/240	434/18866	3.16015e-06	4.28259e-05	2.8903e-05	CAPG/HCK/LCP1/CORO1A/MYO1F/RAC2/HCLS1/GMFG/PLEK/AIF1/CCL21/ARHGAP18/NCKAP1L/GAS2L3/GPR65/ELMO1/ICAM1/IQGAP2/MYO1G	19	GO
GO:0150146	cell junction disassembly	5/240	19/18866	3.2124e-06	4.33541e-05	2.92595e-05	C1QB/C1QC/ITGAM/C1QA/TREM2	5	GO
GO:0051701	interaction with host	13/240	212/18866	3.40272e-06	4.57337e-05	3.08655e-05	VAMP8/CXCR4/CLEC5A/CTSB/MRC1/CD86/SIGLEC1/LGALS9/CTSL/CXCL8/ICAM1/SELPLG/IFITM1	13	GO
GO:0051480	regulation of cytosolic calcium ion concentration	17/240	357/18866	3.48772e-06	4.6684e-05	3.15068e-05	CCL19/CXCR4/CD52/C3AR1/CCR1/C5AR1/P2RX7/FPR3/CORO1A/PTPRC/LYN/CCL21/PTPN6/CEMIP/CD36/GPR65/GNA15	17	GO
GO:0045580	regulation of T cell differentiation	11/240	150/18866	3.53763e-06	4.71455e-05	3.18183e-05	CCL19/CD86/CD83/IL7R/PTPRC/LGALS9/NCKAP1L/LILRB2/SYK/VNN1/PRDM1	11	GO
GO:0043277	apoptotic cell clearance	7/240	51/18866	3.55107e-06	4.71455e-05	3.18183e-05	TYROBP/MARCO/RAC2/TREM2/CD36/C2/NR1H3	7	GO
GO:0061041	regulation of wound healing	11/240	151/18866	3.77334e-06	4.98937e-05	3.3673e-05	CXCR4/FCER1G/APOE/TNFAIP3/PLEK/LYN/PLAUR/CD36/ALOX5/PLAU/SYK	11	GO
GO:0070227	lymphocyte apoptotic process	8/240	73/18866	4.0246e-06	5.30014e-05	3.57704e-05	P2RX7/IL7R/LYN/LGALS9/GIMAP8/TNFRSF21/BTK/DOCK8	8	GO
GO:0002577	regulation of antigen processing and presentation	5/240	20/18866	4.23889e-06	5.53768e-05	3.73736e-05	CCL19/FCGR2B/TREM2/CCL21/LILRB2	5	GO
GO:0010878	cholesterol storage	5/240	20/18866	4.23889e-06	5.53768e-05	3.73736e-05	LPL/CD36/MSR1/NR1H3/ABCA1	5	GO
GO:0051235	maintenance of location	16/240	324/18866	4.28849e-06	5.58017e-05	3.76603e-05	CCL19/APOE/P2RX7/HK2/CORO1A/S100A9/PTPRC/LPL/LYN/CCL21/PTPN6/CEMIP/CD36/MSR1/NR1H3/ABCA1	16	GO
GO:0002832	negative regulation of response to biotic stimulus	9/240	98/18866	4.42008e-06	5.70592e-05	3.8509e-05	MMP12/SLAMF8/VSIG4/TNFAIP3/LGALS9/GRN/ARRB2/LILRB1/NR1H3	9	GO
GO:0030316	osteoclast differentiation	9/240	98/18866	4.42008e-06	5.70592e-05	3.8509e-05	TYROBP/FCER1G/CCR1/SNX10/CSF1R/GPR183/MAFB/TREM2/LILRB1	9	GO
GO:0006801	superoxide metabolic process	8/240	74/18866	4.46341e-06	5.73917e-05	3.87334e-05	ACP5/TYROBP/NCF2/ITGAM/ITGB2/NCF4/CD36/SYK	8	GO
GO:0062207	regulation of pattern recognition receptor signaling pathway	9/240	99/18866	4.80883e-06	6.15908e-05	4.15674e-05	CD14/LY96/TNFAIP3/LYN/ARRB2/CD36/TLR1/NR1H3/CD300A	9	GO
GO:0033630	positive regulation of cell adhesion mediated by integrin	5/240	21/18866	5.506e-06	7.02445e-05	4.74077e-05	CCL21/PTPN6/NCKAP1L/SFRP2/SYK	5	GO
GO:0042554	superoxide anion generation	6/240	36/18866	5.63369e-06	7.13326e-05	4.81421e-05	ACP5/TYROBP/NCF2/ITGAM/ITGB2/SYK	6	GO
GO:0017157	regulation of exocytosis	13/240	222/18866	5.63497e-06	7.13326e-05	4.81421e-05	FCGR2B/VAMP8/FCER1G/ITGAM/ITGB2/RAC2/HMOX1/LYN/FGR/LGALS9/SYK/CD84/CD300A	13	GO
GO:0090322	regulation of superoxide metabolic process	6/240	37/18866	6.65297e-06	8.38942e-05	5.66199e-05	ACP5/TYROBP/ITGAM/ITGB2/CD36/SYK	6	GO
GO:0031295	T cell costimulation	7/240	56/18866	6.73941e-06	8.4333e-05	5.6916e-05	CCL19/TNFSF13B/CD86/LYN/CCL21/PTPN6/VAV1	7	GO
GO:0070228	regulation of lymphocyte apoptotic process	7/240	56/18866	6.73941e-06	8.4333e-05	5.6916e-05	P2RX7/IL7R/LYN/LGALS9/GIMAP8/BTK/DOCK8	7	GO
GO:0032928	regulation of superoxide anion generation	5/240	22/18866	7.05173e-06	8.79044e-05	5.93263e-05	ACP5/TYROBP/ITGAM/ITGB2/SYK	5	GO
GO:0016064	immunoglobulin mediated immune response	13/240	227/18866	7.17487e-06	8.90993e-05	6.01328e-05	FCGR2B/C1QB/C1QC/FCER1G/C1QA/CFI/PTPRC/IGKC/PTPN6/C7/TLR8/BTK/C2	13	GO
GO:0050730	regulation of peptidyl-tyrosine phosphorylation	14/240	263/18866	7.38086e-06	9.13102e-05	6.16249e-05	ITGB2/CSF1R/HCLS1/TREM2/PTPRC/LYN/PTPN6/ARRB2/CD36/SFRP2/SYK/ICAM1/SAMSN1/CD300A	14	GO
GO:0048002	antigen processing and presentation of peptide antigen	12/240	194/18866	7.44346e-06	9.17371e-05	6.1913e-05	FCGR2B/VAMP8/CTSS/FCER1G/NCF2/HLA-DMA/HLA-DMB/LGMN/TREM2/NCF4/CD36/CTSL	12	GO
GO:0007162	negative regulation of cell adhesion	15/240	301/18866	7.70812e-06	9.46418e-05	6.38734e-05	MMP12/FCGR2B/ADAMDEC1/VSIG4/CYP1B1/CD86/PTPRC/CCL21/PTPN6/LGALS9/TNFRSF21/PLXNC1/LILRB2/LILRB1/CD300A	15	GO
GO:0031532	actin cytoskeleton reorganization	9/240	105/18866	7.81446e-06	9.55881e-05	6.4512e-05	HCK/CSF1R/HCLS1/GMFG/PLEK/GPR65/IQGAP2/PARVG/THSD7A	9	GO
GO:0046643	regulation of gamma-delta T cell activation	4/240	11/18866	7.85813e-06	9.57636e-05	6.46305e-05	PTPRC/NCKAP1L/SYK/LILRB1	4	GO
GO:0019724	B cell mediated immunity	13/240	230/18866	8.26746e-06	0.000100377	6.77444e-05	FCGR2B/C1QB/C1QC/FCER1G/C1QA/CFI/PTPRC/IGKC/PTPN6/C7/TLR8/BTK/C2	13	GO
GO:0046632	alpha-beta T cell differentiation	9/240	106/18866	8.44604e-06	0.000102166	6.89513e-05	CCL19/GPR183/CD86/CD83/LGALS9/CTSL/NCKAP1L/SYK/PRDM1	9	GO
GO:0031294	lymphocyte costimulation	7/240	58/18866	8.55081e-06	0.000103051	6.9549e-05	CCL19/TNFSF13B/CD86/LYN/CCL21/PTPN6/VAV1	7	GO
GO:0032535	regulation of cellular component size	17/240	383/18866	8.8306e-06	0.000106032	7.15606e-05	SPP1/APOE/CAPG/HCK/P2RX7/CORO1A/HCLS1/GMFG/PLEK/IL7R/CCL21/ARHGAP18/NCKAP1L/VAV1/ICAM1/IQGAP2/DEPTOR	17	GO
GO:0015850	organic hydroxy compound transport	14/240	268/18866	9.14435e-06	0.000109397	7.38318e-05	SPP1/FCER1G/APOE/AQP9/PLTP/APOC1/SLCO2B1/CD36/MSR1/SYK/OSBPL3/LILRB1/NR1H3/ABCA1	14	GO
GO:0043030	regulation of macrophage activation	7/240	59/18866	9.59773e-06	0.000114402	7.72095e-05	FCGR2B/VSIG4/CTSC/TREM2/PTPRC/GRN/NR1H3	7	GO
GO:0030193	regulation of blood coagulation	8/240	82/18866	9.67233e-06	0.000114872	7.75268e-05	FCER1G/APOE/PLEK/LYN/PLAUR/CD36/PLAU/SYK	8	GO
GO:1903038	negative regulation of leukocyte cell-cell adhesion	10/240	137/18866	1.02851e-05	0.000121707	8.21398e-05	FCGR2B/VSIG4/CD86/CCL21/PTPN6/LGALS9/TNFRSF21/LILRB2/LILRB1/CD300A	10	GO
GO:1904018	positive regulation of vasculature development	13/240	235/18866	1.04168e-05	0.00012282	8.28909e-05	CXCR4/C3AR1/ITGB2/CHI3L1/C5AR1/CYP1B1/HK2/HMOX1/GRN/CTSH/CDH5/CXCL8/SFRP2	13	GO
GO:1900046	regulation of hemostasis	8/240	83/18866	1.05879e-05	0.000124388	8.39493e-05	FCER1G/APOE/PLEK/LYN/PLAUR/CD36/PLAU/SYK	8	GO
GO:1903306	negative regulation of regulated secretory pathway	5/240	24/18866	1.11477e-05	0.000130496	8.80711e-05	FCGR2B/HMOX1/LGALS9/CD84/CD300A	5	GO
GO:0001768	establishment of T cell polarity	4/240	12/18866	1.16695e-05	0.000135632	9.15377e-05	CCL19/CCL21/DOCK8/DOCK2	4	GO
GO:0033004	negative regulation of mast cell activation	4/240	12/18866	1.16695e-05	0.000135632	9.15377e-05	HMOX1/LGALS9/CD84/CD300A	4	GO
GO:0042267	natural killer cell mediated cytotoxicity	7/240	61/18866	1.20118e-05	0.000139115	9.38881e-05	CORO1A/PTPN6/LGALS9/ARRB2/VAV1/LILRB1/SLAMF7	7	GO
GO:0002260	lymphocyte homeostasis	7/240	62/18866	1.33952e-05	0.000154589	0.000104332	TNFSF13B/P2RX7/TNFAIP3/CORO1A/LYN/LGALS9/NCKAP1L	7	GO
GO:0043087	regulation of GTPase activity	19/240	481/18866	1.3656e-05	0.000157044	0.000105989	CCL18/CCL19/ADAP2/CCL8/RGS1/CCL21/ARHGAP18/ARRB2/NCKAP1L/SMAP2/GPR65/PLXNC1/VAV1/ICAM1/ARHGAP30/IQGAP2/TIAM1/DOCK8/DOCK2	19	GO
GO:0032963	collagen metabolic process	9/240	113/18866	1.42167e-05	0.000162919	0.000109953	MMP12/MMP9/CTSS/CTSB/P2RX7/MMP7/ARRB2/CTSL/CTSK	9	GO
GO:0046635	positive regulation of alpha-beta T cell activation	7/240	63/18866	1.49079e-05	0.000170243	0.000114896	CCL19/CD86/CD83/PTPRC/LGALS9/NCKAP1L/SYK	7	GO
GO:0034612	response to tumor necrosis factor	15/240	320/18866	1.59321e-05	0.000181304	0.000122362	CCL18/CCL19/TNFSF13B/CD14/CXCL16/CHI3L1/TNFAIP3/CCL8/TNFRSF1B/CASP1/CCL21/CXCL8/TNFRSF21/SYK/ICAM1	15	GO
GO:0050818	regulation of coagulation	8/240	88/18866	1.63381e-05	0.000184988	0.000124848	FCER1G/APOE/PLEK/LYN/PLAUR/CD36/PLAU/SYK	8	GO
GO:0150077	regulation of neuroinflammatory response	6/240	43/18866	1.63691e-05	0.000184988	0.000124848	MMP9/CTSC/TREM2/PTPRC/TNFRSF1B/GRN	6	GO
GO:0042130	negative regulation of T cell proliferation	7/240	64/18866	1.65592e-05	0.00018585	0.000125429	VSIG4/CD86/PTPN6/LGALS9/TNFRSF21/LILRB2/LILRB1	7	GO
GO:0046637	regulation of alpha-beta T cell differentiation	7/240	64/18866	1.65592e-05	0.00018585	0.000125429	CCL19/CD86/CD83/LGALS9/NCKAP1L/SYK/PRDM1	7	GO
GO:0001767	establishment of lymphocyte polarity	4/240	13/18866	1.66878e-05	0.000186652	0.00012597	CCL19/CCL21/DOCK8/DOCK2	4	GO
GO:0031664	regulation of lipopolysaccharide-mediated signaling pathway	5/240	26/18866	1.68978e-05	0.000188355	0.00012712	LY86/LY96/TNFAIP3/CD180/CD36	5	GO
GO:0002478	antigen processing and presentation of exogenous peptide antigen	11/240	177/18866	1.71533e-05	0.000190553	0.000128604	FCGR2B/VAMP8/CTSS/FCER1G/NCF2/HLA-DMA/HLA-DMB/LGMN/NCF4/CD36/CTSL	11	GO
GO:0050868	negative regulation of T cell activation	9/240	118/18866	2.01521e-05	0.000223108	0.000150575	FCGR2B/VSIG4/CD86/PTPN6/LGALS9/TNFRSF21/LILRB2/LILRB1/CD300A	9	GO
GO:0002228	natural killer cell mediated immunity	7/240	66/18866	2.03166e-05	0.000224168	0.00015129	CORO1A/PTPN6/LGALS9/ARRB2/VAV1/LILRB1/SLAMF7	7	GO
GO:0034122	negative regulation of toll-like receptor signaling pathway	6/240	45/18866	2.14102e-05	0.00023465	0.000158364	CD14/LY96/TNFAIP3/LYN/ARRB2/CD300A	6	GO
GO:1904646	cellular response to amyloid-beta	6/240	45/18866	2.14102e-05	0.00023465	0.000158364	FCGR2B/LGMN/TREM2/CD36/ICAM1/ITGA4	6	GO
GO:0001771	immunological synapse formation	4/240	14/18866	2.31298e-05	0.000252649	0.000170512	CCL19/CCL21/DOCK8/DOCK2	4	GO
GO:0019884	antigen processing and presentation of exogenous antigen	11/240	185/18866	2.58813e-05	0.000281761	0.000190159	FCGR2B/VAMP8/CTSS/FCER1G/NCF2/HLA-DMA/HLA-DMB/LGMN/NCF4/CD36/CTSL	11	GO
GO:0031334	positive regulation of protein-containing complex assembly	13/240	257/18866	2.68436e-05	0.000291267	0.000196575	HCK/LCP1/CORO1A/GMFG/PLEK/CCL21/CD36/NCKAP1L/CDH5/SYK/ICAM1/IQGAP2/ABCA1	13	GO
GO:0008154	actin polymerization or depolymerization	12/240	221/18866	2.74632e-05	0.000297003	0.000200446	CAPG/HCK/CORO1A/HCLS1/GMFG/PLEK/AIF1/CCL21/ARHGAP18/NCKAP1L/ICAM1/IQGAP2	12	GO
GO:0046638	positive regulation of alpha-beta T cell differentiation	6/240	47/18866	2.76321e-05	0.000297844	0.000201013	CCL19/CD86/CD83/LGALS9/NCKAP1L/SYK	6	GO
GO:0002761	regulation of myeloid leukocyte differentiation	9/240	123/18866	2.80748e-05	0.000301619	0.000203561	C1QC/TYROBP/EVI2B/CCR1/HCLS1/MAFB/TREM2/LYN/LILRB1	9	GO
GO:0045577	regulation of B cell differentiation	5/240	29/18866	2.95711e-05	0.000316653	0.000213708	SLAMF8/PTPN6/NCKAP1L/SYK/BTK	5	GO
GO:0032370	positive regulation of lipid transport	7/240	70/18866	2.99532e-05	0.000319697	0.000215762	SPP1/APOE/PLTP/P2RX7/ACSL5/NR1H3/ABCA1	7	GO
GO:0002455	humoral immune response mediated by circulating immunoglobulin	10/240	155/18866	3.01408e-05	0.000320651	0.000216406	FCGR2B/C1QB/C1QC/C1QA/CFI/PTPRC/IGKC/PTPN6/C7/C2	10	GO
GO:0002281	macrophage activation involved in immune response	4/240	15/18866	3.12262e-05	0.000328137	0.000221458	TYROBP/TREM2/GRN/SYK	4	GO
GO:0034134	toll-like receptor 2 signaling pathway	4/240	15/18866	3.12262e-05	0.000328137	0.000221458	TNFAIP3/PIK3AP1/LYN/TLR1	4	GO
GO:0002820	negative regulation of adaptive immune response	6/240	48/18866	3.12463e-05	0.000328137	0.000221458	FCGR2B/IL7R/PTPRC/PTPN6/LILRB1/SAMSN1	6	GO
GO:0008360	regulation of cell shape	10/240	156/18866	3.18512e-05	0.000333416	0.000225021	ITGB2/HCK/EPB41L3/CSF1R/CORO1A/RAC2/FGR/ARHGAP18/PLXNC1/ICAM1	10	GO
GO:0008064	regulation of actin polymerization or depolymerization	11/240	190/18866	3.30971e-05	0.000345352	0.000233076	CAPG/HCK/CORO1A/HCLS1/GMFG/PLEK/CCL21/ARHGAP18/NCKAP1L/ICAM1/IQGAP2	11	GO
GO:0030832	regulation of actin filament length	11/240	191/18866	3.47317e-05	0.000361254	0.000243809	CAPG/HCK/CORO1A/HCLS1/GMFG/PLEK/CCL21/ARHGAP18/NCKAP1L/ICAM1/IQGAP2	11	GO
GO:0043372	positive regulation of CD4-positive alpha-beta T cell differentiation	5/240	30/18866	3.51192e-05	0.000364125	0.000245746	CCL19/CD86/CD83/LGALS9/NCKAP1L	5	GO
GO:0030168	platelet activation	10/240	158/18866	3.55223e-05	0.000367138	0.00024778	FCER1G/APOE/FERMT3/PLEK/LYN/PTPN6/ARRB2/SYK/VAV1/GNA15	10	GO
GO:0031349	positive regulation of defense response	16/240	385/18866	3.62429e-05	0.000373405	0.000252009	MMP12/VAMP8/FCER1G/HCK/PLA2G7/CTSC/S100A9/TREM2/LPL/MNDA/LYN/GRN/TLR8/SYK/VAV1/BTK	16	GO
GO:0030041	actin filament polymerization	11/240	193/18866	3.82108e-05	0.000392442	0.000264858	CAPG/HCK/CORO1A/HCLS1/GMFG/AIF1/CCL21/ARHGAP18/NCKAP1L/ICAM1/IQGAP2	11	GO
GO:0050830	defense response to Gram-positive bacterium	8/240	99/18866	3.85998e-05	0.000395194	0.000266715	ACP5/RNASE6/MPEG1/C5AR1/P2RX7/LYZ/FGR/CD36	8	GO
GO:0032760	positive regulation of tumor necrosis factor production	6/240	50/18866	3.96125e-05	0.000404295	0.000272857	CCL19/CD14/FCER1G/LY96/PTPRC/CD36	6	GO
GO:0002576	platelet degranulation	9/240	129/18866	4.09303e-05	0.000413903	0.000279342	FCER1G/F13A1/MMRN1/FERMT3/PLEK/LYN/LHFPL2/CD36/SYK	9	GO
GO:0002523	leukocyte migration involved in inflammatory response	4/240	16/18866	4.12199e-05	0.000413903	0.000279342	SLAMF8/ITGB2/S100A9/ALOX5	4	GO
GO:0033008	positive regulation of mast cell activation involved in immune response	4/240	16/18866	4.12199e-05	0.000413903	0.000279342	VAMP8/FCER1G/FGR/SYK	4	GO
GO:0043306	positive regulation of mast cell degranulation	4/240	16/18866	4.12199e-05	0.000413903	0.000279342	VAMP8/FCER1G/FGR/SYK	4	GO
GO:1905153	regulation of membrane invagination	4/240	16/18866	4.12199e-05	0.000413903	0.000279342	TREM2/CD36/NCKAP1L/CD300A	4	GO
GO:0034368	protein-lipid complex remodeling	5/240	31/18866	4.1441e-05	0.000413903	0.000279342	APOE/PLTP/APOC1/PLA2G7/LPL	5	GO
GO:0034369	plasma lipoprotein particle remodeling	5/240	31/18866	4.1441e-05	0.000413903	0.000279342	APOE/PLTP/APOC1/PLA2G7/LPL	5	GO
GO:0009615	response to virus	15/240	349/18866	4.34668e-05	0.000432813	0.000292104	MMP12/CCL19/CXCR4/RNASE6/TNFAIP3/CCL8/PTPRC/FGR/LGALS9/IFI27/TLR8/LILRB1/OAS1/IFITM1/MX2	15	GO
GO:0050728	negative regulation of inflammatory response	11/240	196/18866	4.39914e-05	0.000436705	0.000294731	ACP5/FCGR2B/SLAMF8/APOE/TNFAIP3/PTPRC/TNFRSF1B/GRN/ALOX5/CDH5/NR1H3	11	GO
GO:0071827	plasma lipoprotein particle organization	6/240	51/18866	4.44207e-05	0.00043963	0.000296705	APOE/PLTP/APOC1/PLA2G7/LPL/ABCA1	6	GO
GO:0046942	carboxylic acid transport	15/240	350/18866	4.49061e-05	0.000443091	0.000299041	APOE/AQP9/P2RX7/SLC16A6/SLCO2B1/SLC16A10/SLC7A7/CD36/SYK/SLC1A3/ACSL5/SLC38A6/SLCO2A1/KMO/FOLR2	15	GO
GO:0043112	receptor metabolic process	11/240	198/18866	4.82503e-05	0.000473899	0.000319833	FCER1G/APOE/ITGB2/LGMN/ARRB2/CD36/CXCL8/SYK/LILRB1/NR1H3/MX2	11	GO
GO:0010743	regulation of macrophage derived foam cell differentiation	5/240	32/18866	4.86088e-05	0.000473899	0.000319833	LPL/CD36/MSR1/NR1H3/ABCA1	5	GO
GO:0032673	regulation of interleukin-4 production	5/240	32/18866	4.86088e-05	0.000473899	0.000319833	FCER1G/CD86/CD83/LGALS9/SYK	5	GO
GO:0034367	protein-containing complex remodeling	5/240	32/18866	4.86088e-05	0.000473899	0.000319833	APOE/PLTP/APOC1/PLA2G7/LPL	5	GO
GO:0030198	extracellular matrix organization	16/240	395/18866	4.92151e-05	0.000478382	0.000322858	MMP12/SPP1/MMP9/CTSS/ITGAM/ITGB2/LCP1/CYP1B1/TNFRSF1B/MMP7/CTSL/SFRP2/ICAM1/ITGAL/ITGA4/CTSK	16	GO
GO:0015849	organic acid transport	15/240	353/18866	4.94785e-05	0.000479516	0.000323624	APOE/AQP9/P2RX7/SLC16A6/SLCO2B1/SLC16A10/SLC7A7/CD36/SYK/SLC1A3/ACSL5/SLC38A6/SLCO2A1/KMO/FOLR2	15	GO
GO:1903557	positive regulation of tumor necrosis factor superfamily cytokine production	6/240	52/18866	4.96852e-05	0.000480094	0.000324014	CCL19/CD14/FCER1G/LY96/PTPRC/CD36	6	GO
GO:0043062	extracellular structure organization	16/240	396/18866	5.07139e-05	0.000488589	0.000329747	MMP12/SPP1/MMP9/CTSS/ITGAM/ITGB2/LCP1/CYP1B1/TNFRSF1B/MMP7/CTSL/SFRP2/ICAM1/ITGAL/ITGA4/CTSK	16	GO
GO:0002495	antigen processing and presentation of peptide antigen via MHC class II	8/240	103/18866	5.13221e-05	0.000492994	0.00033272	FCGR2B/CTSS/FCER1G/HLA-DMA/HLA-DMB/LGMN/TREM2/CTSL	8	GO
GO:0032695	negative regulation of interleukin-12 production	4/240	17/18866	5.33659e-05	0.000509629	0.000343946	ACP5/ARRB2/TLR8/LILRB1	4	GO
GO:0097067	cellular response to thyroid hormone stimulus	4/240	17/18866	5.33659e-05	0.000509629	0.000343946	CTSS/CTSB/CTSH/CTSL	4	GO
GO:1903531	negative regulation of secretion by cell	10/240	166/18866	5.40531e-05	0.000514686	0.00034736	FCGR2B/VAMP8/APOE/HMOX1/TNFRSF1B/LGALS9/LILRB1/CD84/NR1H3/CD300A	10	GO
GO:0002504	antigen processing and presentation of peptide or polysaccharide antigen via MHC class II	8/240	104/18866	5.4997e-05	0.000522152	0.000352398	FCGR2B/CTSS/FCER1G/HLA-DMA/HLA-DMB/LGMN/TREM2/CTSL	8	GO
GO:0061756	leukocyte adhesion to vascular endothelial cell	6/240	53/18866	5.54373e-05	0.000524807	0.00035419	ITGB2/CCL21/ALOX5/ICAM1/SELPLG/ITGA4	6	GO
GO:0045920	negative regulation of exocytosis	5/240	33/18866	5.66983e-05	0.000535193	0.0003612	FCGR2B/HMOX1/LGALS9/CD84/CD300A	5	GO
GO:0032368	regulation of lipid transport	9/240	135/18866	5.84469e-05	0.000550108	0.000371266	SPP1/APOE/PLTP/APOC1/P2RX7/SYK/ACSL5/NR1H3/ABCA1	9	GO
GO:2000116	regulation of cysteine-type endopeptidase activity	12/240	239/18866	5.88538e-05	0.000552347	0.000372777	MMP9/S100A9/LGMN/CASP1/PLAUR/LGALS9/TNFSF10/ARRB2/CTSH/SFRP2/SYK/RPS6KA1	12	GO
GO:0043367	CD4-positive alpha-beta T cell differentiation	7/240	78/18866	6.05633e-05	0.000566762	0.000382505	CCL19/GPR183/CD86/CD83/LGALS9/CTSL/NCKAP1L	7	GO
GO:0032623	interleukin-2 production	6/240	54/18866	6.17096e-05	0.000574778	0.000387915	FCER1G/VSIG4/TNFAIP3/CD86/CD83/PTPRC	6	GO
GO:0070997	neuron death	15/240	360/18866	6.17719e-05	0.000574778	0.000387915	FCGR2B/TYROBP/APOE/ITGAM/C1QA/ITGB2/C5AR1/CORO1A/HMOX1/LGMN/TNFRSF1B/GRN/ARRB2/TNFRSF21/KMO	15	GO
GO:0006809	nitric oxide biosynthetic process	7/240	79/18866	6.57402e-05	0.000608686	0.0004108	ACP5/ITGB2/CYP1B1/AIF1/CD36/ICAM1/GLA	7	GO
GO:0050715	positive regulation of cytokine secretion	5/240	34/18866	6.57888e-05	0.000608686	0.0004108	CD14/CLEC5A/P2RX7/FGR/SYK	5	GO
GO:0043254	regulation of protein-containing complex assembly	17/240	449/18866	6.61367e-05	0.000610176	0.000411805	APOE/CAPG/HCK/LCP1/CORO1A/HCLS1/GMFG/PLEK/CCL21/ARHGAP18/CD36/NCKAP1L/CDH5/SYK/ICAM1/IQGAP2/ABCA1	17	GO
GO:1901214	regulation of neuron death	14/240	321/18866	6.68974e-05	0.000615456	0.000415369	FCGR2B/TYROBP/APOE/ITGAM/C1QA/ITGB2/C5AR1/CORO1A/HMOX1/LGMN/TNFRSF1B/GRN/ARRB2/KMO	14	GO
GO:0043547	positive regulation of GTPase activity	16/240	406/18866	6.8066e-05	0.000624448	0.000421438	CCL18/CCL19/ADAP2/CCL8/RGS1/CCL21/ARHGAP18/NCKAP1L/SMAP2/GPR65/VAV1/ICAM1/ARHGAP30/TIAM1/DOCK8/DOCK2	16	GO
GO:0032720	negative regulation of tumor necrosis factor production	6/240	55/18866	6.8536e-05	0.000625247	0.000421977	ACP5/TNFAIP3/TREM2/PTPN6/LGALS9/ARRB2	6	GO
GO:0071825	protein-lipid complex subunit organization	6/240	55/18866	6.8536e-05	0.000625247	0.000421977	APOE/PLTP/APOC1/PLA2G7/LPL/ABCA1	6	GO
GO:0031529	ruffle organization	6/240	56/18866	7.59516e-05	0.000683456	0.000461262	SNX10/CSF1R/PLEK/AIF1/CCL21/ICAM1	6	GO
GO:1903307	positive regulation of regulated secretory pathway	6/240	56/18866	7.59516e-05	0.000683456	0.000461262	VAMP8/FCER1G/ITGAM/ITGB2/FGR/SYK	6	GO
GO:0001914	regulation of T cell mediated cytotoxicity	5/240	35/18866	7.59628e-05	0.000683456	0.000461262	FCGR2B/P2RX7/IL7R/PTPRC/LILRB1	5	GO
GO:0032633	interleukin-4 production	5/240	35/18866	7.59628e-05	0.000683456	0.000461262	FCER1G/CD86/CD83/LGALS9/SYK	5	GO
GO:0032735	positive regulation of interleukin-12 production	5/240	35/18866	7.59628e-05	0.000683456	0.000461262	CCL19/IRF8/LGALS9/CD36/SYK	5	GO
GO:0030833	regulation of actin filament polymerization	10/240	174/18866	8.02572e-05	0.00072011	0.000486	CAPG/HCK/CORO1A/HCLS1/GMFG/CCL21/ARHGAP18/NCKAP1L/ICAM1/IQGAP2	10	GO
GO:2001233	regulation of apoptotic signaling pathway	16/240	413/18866	8.31341e-05	0.000743879	0.000502041	MMP9/TNFAIP3/CTSC/HMOX1/S100A9/PTPRC/PLAUR/LGALS9/TNFSF10/ARRB2/CTSH/SFRP2/ICAM1/ZNF385A/DEPTOR/VNN1	16	GO
GO:0022617	extracellular matrix disassembly	7/240	82/18866	8.34811e-05	0.000744943	0.000502759	MMP12/MMP9/CTSS/LCP1/MMP7/CTSL/CTSK	7	GO
GO:0045862	positive regulation of proteolysis	15/240	370/18866	8.39567e-05	0.000745437	0.000503093	APOE/CTSC/S100A9/LGMN/TREM2/LYN/TNFRSF1B/CASP1/LGALS9/GRN/DAB2/TNFSF10/CTSH/SFRP2/SYK	15	GO
GO:1903556	negative regulation of tumor necrosis factor superfamily cytokine production	6/240	57/18866	8.39929e-05	0.000745437	0.000503093	ACP5/TNFAIP3/TREM2/PTPN6/LGALS9/ARRB2	6	GO
GO:0002710	negative regulation of T cell mediated immunity	4/240	19/18866	8.51879e-05	0.000747913	0.000504764	FCGR2B/IL7R/PTPRC/LILRB1	4	GO
GO:0032930	positive regulation of superoxide anion generation	4/240	19/18866	8.51879e-05	0.000747913	0.000504764	TYROBP/ITGAM/ITGB2/SYK	4	GO
GO:0046629	gamma-delta T cell activation	4/240	19/18866	8.51879e-05	0.000747913	0.000504764	PTPRC/NCKAP1L/SYK/LILRB1	4	GO
GO:0090026	positive regulation of monocyte chemotaxis	4/240	19/18866	8.51879e-05	0.000747913	0.000504764	CCR1/PLA2G7/LGMN/AIF1	4	GO
GO:0010543	regulation of platelet activation	5/240	36/18866	8.73062e-05	0.000762412	0.000514549	FCER1G/APOE/PLEK/LYN/SYK	5	GO
GO:0002833	positive regulation of response to biotic stimulus	12/240	251/18866	9.39607e-05	0.000818335	0.000552291	MMP12/FCER1G/LY86/LY96/HCK/MNDA/LYN/CD180/GRN/TLR8/SYK/VAV1	12	GO
GO:0002700	regulation of production of molecular mediator of immune response	9/240	144/18866	9.63128e-05	0.00083659	0.000564611	FCGR2B/FCER1G/HMOX1/PTPRC/TNFRSF1B/CD36/LILRB1/BTK/MZB1	9	GO
GO:0006956	complement activation	10/240	178/18866	9.69691e-05	0.000837834	0.000565451	C1QB/C1QC/C3AR1/C1QA/VSIG4/C5AR1/CFI/IGKC/C7/C2	10	GO
GO:0048771	tissue remodeling	10/240	178/18866	9.69691e-05	0.000837834	0.000565451	SPP1/ACP5/P2RX7/LIPA/SNX10/CSF1R/TNFAIP3/RAC2/SYK/CTSK	10	GO
GO:0046209	nitric oxide metabolic process	7/240	84/18866	9.73422e-05	0.000838838	0.000566128	ACP5/ITGB2/CYP1B1/AIF1/CD36/ICAM1/GLA	7	GO
GO:1904994	regulation of leukocyte adhesion to vascular endothelial cell	5/240	37/18866	9.99082e-05	0.000858685	0.000579523	ITGB2/CCL21/ALOX5/ICAM1/ITGA4	5	GO
GO:0043281	regulation of cysteine-type endopeptidase activity involved in apoptotic process	11/240	215/18866	0.000101145	0.000866002	0.000584461	MMP9/S100A9/CASP1/PLAUR/LGALS9/TNFSF10/ARRB2/CTSH/SFRP2/SYK/RPS6KA1	11	GO
GO:0051924	regulation of calcium ion transport	12/240	253/18866	0.00010129	0.000866002	0.000584461	CXCR4/CCR1/P2RX7/CORO1A/LYN/PTPN6/CEMIP/ARRB2/LILRB2/LILRB1/ICAM1/CD84	12	GO
GO:0030101	natural killer cell activation	7/240	85/18866	0.000104944	0.000894334	0.000603583	TYROBP/ITGB2/CORO1A/PTPRC/FGR/SLAMF7/PRDM1	7	GO
GO:0051651	maintenance of location in cell	11/240	216/18866	0.000105397	0.000894334	0.000603583	CCL19/APOE/P2RX7/HK2/CORO1A/S100A9/PTPRC/LYN/CCL21/PTPN6/CEMIP	11	GO
GO:0010875	positive regulation of cholesterol efflux	4/240	20/18866	0.000105425	0.000894334	0.000603583	APOE/PLTP/NR1H3/ABCA1	4	GO
GO:0031623	receptor internalization	8/240	115/18866	0.00011205	0.00094807	0.000639848	FCER1G/ITGB2/ARRB2/CD36/CXCL8/SYK/LILRB1/MX2	8	GO
GO:0010742	macrophage derived foam cell differentiation	5/240	38/18866	0.000113861	0.000955968	0.000645179	LPL/CD36/MSR1/NR1H3/ABCA1	5	GO
GO:0032733	positive regulation of interleukin-10 production	5/240	38/18866	0.000113861	0.000955968	0.000645179	FCER1G/CD83/TREM2/LGALS9/SYK	5	GO
GO:0090077	foam cell differentiation	5/240	38/18866	0.000113861	0.000955968	0.000645179	LPL/CD36/MSR1/NR1H3/ABCA1	5	GO
GO:0071356	cellular response to tumor necrosis factor	13/240	297/18866	0.000117404	0.000983179	0.000663544	CCL18/CCL19/TNFSF13B/CHI3L1/TNFAIP3/CCL8/TNFRSF1B/CASP1/CCL21/CXCL8/TNFRSF21/SYK/ICAM1	13	GO
GO:0006816	calcium ion transport	16/240	426/18866	0.000119025	0.000994208	0.000670987	CCL19/CXCR4/CCR1/P2RX7/CCL8/CORO1A/PTPRC/LYN/CCL21/PTPN6/CEMIP/ARRB2/LILRB2/LILRB1/ICAM1/CD84	16	GO
GO:2001057	reactive nitrogen species metabolic process	7/240	87/18866	0.000121597	0.0010131	0.000683736	ACP5/ITGB2/CYP1B1/AIF1/CD36/ICAM1/GLA	7	GO
GO:0031343	positive regulation of cell killing	6/240	61/18866	0.000123192	0.00102378	0.000690943	TYROBP/ITGAM/P2RX7/PTPRC/SYK/VAV1	6	GO
GO:1903978	regulation of microglial cell activation	4/240	21/18866	0.000128936	0.00106878	0.000721316	CTSC/TREM2/PTPRC/GRN	4	GO
GO:2000249	regulation of actin cytoskeleton reorganization	5/240	39/18866	0.000129262	0.00106878	0.000721316	HCK/CSF1R/HCLS1/GMFG/IQGAP2	5	GO
GO:0051258	protein polymerization	13/240	300/18866	0.000129732	0.00106996	0.000722112	CAPG/HCK/CORO1A/HCLS1/GMFG/AIF1/CCL21/ARHGAP18/NCKAP1L/CDH5/ICAM1/IQGAP2/MX2	13	GO
GO:0015918	sterol transport	8/240	118/18866	0.000134132	0.00110069	0.000742854	APOE/PLTP/APOC1/CD36/MSR1/OSBPL3/NR1H3/ABCA1	8	GO
GO:0051209	release of sequestered calcium ion into cytosol	8/240	118/18866	0.000134132	0.00110069	0.000742854	CCL19/P2RX7/CORO1A/PTPRC/LYN/CCL21/PTPN6/CEMIP	8	GO
GO:0051656	establishment of organelle localization	16/240	432/18866	0.00013973	0.00114375	0.000771915	VAMP8/FCER1G/CTSC/MYO1F/RAC2/HMOX1/LYN/FGR/LGALS9/SYK/BTK/CD84/MYO1G/ITGA4/CD300A/MX2	16	GO
GO:0072511	divalent inorganic cation transport	17/240	478/18866	0.000140932	0.00115071	0.000776611	CCL19/CXCR4/CCR1/P2RX7/CCL8/CORO1A/PTPRC/LYN/CCL21/PTPN6/CEMIP/ARRB2/LILRB2/LILRB1/ICAM1/CD84/TCN2	17	GO
GO:0051283	negative regulation of sequestering of calcium ion	8/240	119/18866	0.000142246	0.00115854	0.000781893	CCL19/P2RX7/CORO1A/PTPRC/LYN/CCL21/PTPN6/CEMIP	8	GO
GO:0033005	positive regulation of mast cell activation	4/240	22/18866	0.000156021	0.00126757	0.00085548	VAMP8/FCER1G/FGR/SYK	4	GO
GO:0002440	production of molecular mediator of immune response	13/240	306/18866	0.000157772	0.00127862	0.000862936	FCGR2B/TNFSF13B/FCER1G/CD86/HMOX1/IL7R/PTPRC/IGKC/TNFRSF1B/CD36/LILRB1/BTK/MZB1	13	GO
GO:0051051	negative regulation of transport	17/240	483/18866	0.000159486	0.00128776	0.000869102	FCGR2B/MMP9/VAMP8/APOE/APOC1/CORO1A/HMOX1/TNFRSF1B/LGALS9/CD36/LILRB2/LILRB1/ICAM1/CD84/NR1H3/CD300A/MCTP1	17	GO
GO:0051282	regulation of sequestering of calcium ion	8/240	121/18866	0.000159688	0.00128776	0.000869102	CCL19/P2RX7/CORO1A/PTPRC/LYN/CCL21/PTPN6/CEMIP	8	GO
GO:0006869	lipid transport	15/240	393/18866	0.000163028	0.00131145	0.000885093	SPP1/APOE/AQP9/PLTP/APOC1/P2RX7/SLCO2B1/CD36/MSR1/SYK/OSBPL3/ACSL5/SLCO2A1/NR1H3/ABCA1	15	GO
GO:0038083	peptidyl-tyrosine autophosphorylation	5/240	41/18866	0.000164801	0.00131922	0.000890336	HCK/SLA/LYN/FGR/SYK	5	GO
GO:1902042	negative regulation of extrinsic apoptotic signaling pathway via death domain receptors	5/240	41/18866	0.000164801	0.00131922	0.000890336	TNFAIP3/HMOX1/TNFSF10/SFRP2/ICAM1	5	GO
GO:0051048	negative regulation of secretion	10/240	190/18866	0.000165828	0.00132419	0.000893693	FCGR2B/VAMP8/APOE/HMOX1/TNFRSF1B/LGALS9/LILRB1/CD84/NR1H3/CD300A	10	GO
GO:0010876	lipid localization	16/240	440/18866	0.000172191	0.00137165	0.00092572	SPP1/APOE/AQP9/PLTP/APOC1/P2RX7/LPL/SLCO2B1/CD36/MSR1/SYK/OSBPL3/ACSL5/SLCO2A1/NR1H3/ABCA1	16	GO
GO:0022408	negative regulation of cell-cell adhesion	10/240	191/18866	0.000173071	0.00137531	0.000928188	FCGR2B/VSIG4/CD86/CCL21/PTPN6/LGALS9/TNFRSF21/LILRB2/LILRB1/CD300A	10	GO
GO:0048247	lymphocyte chemotaxis	6/240	65/18866	0.000175668	0.00139256	0.00093983	CCL18/CCL19/CXCL16/CCL8/GPR183/CCL21	6	GO
GO:0050708	regulation of protein secretion	14/240	352/18866	0.000176332	0.00139443	0.000941098	FCGR2B/CD14/APOE/CLEC5A/P2RX7/TREM2/LYN/FGR/ALOX5/TLR1/TLR8/SYK/TIAM1/NR1H3	14	GO
GO:0010959	regulation of metal ion transport	15/240	396/18866	0.000177048	0.00139671	0.000942637	CXCR4/CCR1/P2RX7/CORO1A/SLC31A2/TREM2/LYN/PTPN6/CEMIP/ARRB2/LILRB2/LILRB1/ICAM1/GLRX/CD84	15	GO
GO:0007160	cell-matrix adhesion	11/240	230/18866	0.000182973	0.00143307	0.000967172	MMP12/ITGB2/FERMT3/SIGLEC1/CCL21/CD36/PLAU/ITGAL/TIAM1/ITGA4/PARVG	11	GO
GO:0051495	positive regulation of cytoskeleton organization	11/240	230/18866	0.000182973	0.00143307	0.000967172	HCK/P2RX7/CORO1A/HCLS1/GMFG/PLEK/CCL21/NCKAP1L/GPR65/ICAM1/IQGAP2	11	GO
GO:0097191	extrinsic apoptotic signaling pathway	11/240	230/18866	0.000182973	0.00143307	0.000967172	BCL2A1/P2RX7/TNFAIP3/HMOX1/PTPRC/TNFRSF1B/IFI27/TNFSF10/SFRP2/ICAM1/DEPTOR	11	GO
GO:1904894	positive regulation of receptor signaling pathway via STAT	7/240	93/18866	0.000184836	0.0014442	0.000974682	CSF1R/CYP1B1/HCLS1/IL10RA/IL7R/LYN/CD300A	7	GO
GO:0032693	negative regulation of interleukin-10 production	4/240	23/18866	0.00018699	0.00145407	0.000981346	FCGR2B/TYROBP/TNFRSF21/LILRB1	4	GO
GO:1904996	positive regulation of leukocyte adhesion to vascular endothelial cell	4/240	23/18866	0.00018699	0.00145407	0.000981346	ITGB2/ALOX5/ICAM1/ITGA4	4	GO
GO:0051208	sequestering of calcium ion	8/240	124/18866	0.000189125	0.00146718	0.000990192	CCL19/P2RX7/CORO1A/PTPRC/LYN/CCL21/PTPN6/CEMIP	8	GO
GO:0032271	regulation of protein polymerization	11/240	231/18866	0.000190004	0.00147051	0.00099244	CAPG/HCK/CORO1A/HCLS1/GMFG/CCL21/ARHGAP18/NCKAP1L/CDH5/ICAM1/IQGAP2	11	GO
GO:0050729	positive regulation of inflammatory response	9/240	158/18866	0.000194851	0.00150445	0.00101535	VAMP8/FCER1G/PLA2G7/CTSC/S100A9/TREM2/LPL/GRN/BTK	9	GO
GO:0002823	negative regulation of adaptive immune response based on somatic recombination of immune receptors built from immunoglobulin superfamily domains	5/240	43/18866	0.000207356	0.00159316	0.00107521	FCGR2B/IL7R/PTPRC/PTPN6/LILRB1	5	GO
GO:0045124	regulation of bone resorption	5/240	43/18866	0.000207356	0.00159316	0.00107521	SPP1/P2RX7/CSF1R/TNFAIP3/SYK	5	GO
GO:0045123	cellular extravasation	6/240	67/18866	0.000207803	0.00159316	0.00107521	ITGB2/CCL21/ICAM1/ITGAL/SELPLG/ITGA4	6	GO
GO:0060337	type I interferon signaling pathway	7/240	95/18866	0.000211014	0.00161022	0.00108673	MMP12/IRF8/PTPN6/IFI27/OAS1/IFITM1/MX2	7	GO
GO:0071357	cellular response to type I interferon	7/240	95/18866	0.000211014	0.00161022	0.00108673	MMP12/IRF8/PTPN6/IFI27/OAS1/IFITM1/MX2	7	GO
GO:0045765	regulation of angiogenesis	15/240	403/18866	0.000213896	0.0016284	0.001099	CXCR4/C3AR1/ITGB2/CHI3L1/C5AR1/TNFAIP3/CYP1B1/HK2/HMOX1/GRN/ALOX5/CTSH/CDH5/CXCL8/SFRP2	15	GO
GO:0031589	cell-substrate adhesion	14/240	359/18866	0.000215916	0.00163996	0.0011068	MMP12/ITGB2/CORO1A/FERMT3/RAC2/SIGLEC1/CCL21/CD36/PLAU/ITGAL/TIAM1/MYO1G/ITGA4/PARVG	14	GO
GO:0032956	regulation of actin cytoskeleton organization	14/240	360/18866	0.000222154	0.00167568	0.00113091	CAPG/HCK/CSF1R/CORO1A/RAC2/HCLS1/GMFG/PLEK/CCL21/ARHGAP18/NCKAP1L/GPR65/ICAM1/IQGAP2	14	GO
GO:0002438	acute inflammatory response to antigenic stimulus	4/240	24/18866	0.000222159	0.00167568	0.00113091	FCGR2B/FCER1G/BTK/ICAM1	4	GO
GO:0032753	positive regulation of interleukin-4 production	4/240	24/18866	0.000222159	0.00167568	0.00113091	FCER1G/CD86/LGALS9/SYK	4	GO
GO:0034381	plasma lipoprotein particle clearance	6/240	68/18866	0.000225518	0.0016932	0.00114273	APOE/APOC1/LIPA/HMOX1/CD36/MSR1	6	GO
GO:0045428	regulation of nitric oxide biosynthetic process	6/240	68/18866	0.000225518	0.0016932	0.00114273	ACP5/ITGB2/AIF1/CD36/ICAM1/GLA	6	GO
GO:0002524	hypersensitivity	3/240	10/18866	0.000228384	0.00169909	0.00114671	FCGR2B/FCER1G/BTK	3	GO
GO:0034135	regulation of toll-like receptor 2 signaling pathway	3/240	10/18866	0.000228384	0.00169909	0.00114671	TNFAIP3/LYN/TLR1	3	GO
GO:0070391	response to lipoteichoic acid	3/240	10/18866	0.000228384	0.00169909	0.00114671	CD14/TREM2/CD36	3	GO
GO:0071223	cellular response to lipoteichoic acid	3/240	10/18866	0.000228384	0.00169909	0.00114671	CD14/TREM2/CD36	3	GO
GO:1905521	regulation of macrophage migration	5/240	44/18866	0.000231536	0.00171863	0.00115989	SLAMF8/C3AR1/C5AR1/CSF1R/TREM2	5	GO
GO:1903409	reactive oxygen species biosynthetic process	8/240	128/18866	0.000235174	0.00174167	0.00117545	ACP5/ITGB2/CYP1B1/AIF1/CD36/ALOX5/ICAM1/GLA	8	GO
GO:1901216	positive regulation of neuron death	7/240	97/18866	0.000240105	0.00177017	0.00119468	FCGR2B/TYROBP/ITGAM/C1QA/ITGB2/GRN/KMO	7	GO
GO:0110053	regulation of actin filament organization	12/240	278/18866	0.000243402	0.00179043	0.00120836	CAPG/HCK/CORO1A/HCLS1/GMFG/PLEK/CCL21/ARHGAP18/NCKAP1L/GPR65/ICAM1/IQGAP2	12	GO
GO:0014002	astrocyte development	5/240	45/18866	0.000257801	0.00189209	0.00127696	C1QA/C5AR1/S100A9/TREM2/GRN	5	GO
GO:0010952	positive regulation of peptidase activity	10/240	201/18866	0.000261366	0.00191319	0.0012912	S100A9/LGMN/LYN/CASP1/LGALS9/GRN/TNFSF10/CTSH/SFRP2/SYK	10	GO
GO:0071677	positive regulation of mononuclear cell migration	4/240	25/18866	0.000261848	0.00191319	0.0012912	CCR1/PLA2G7/LGMN/AIF1	4	GO
GO:0019886	antigen processing and presentation of exogenous peptide antigen via MHC class II	7/240	99/18866	0.000272343	0.00198101	0.00133698	FCGR2B/CTSS/FCER1G/HLA-DMA/HLA-DMB/LGMN/CTSL	7	GO
GO:0034340	response to type I interferon	7/240	99/18866	0.000272343	0.00198101	0.00133698	MMP12/IRF8/PTPN6/IFI27/OAS1/IFITM1/MX2	7	GO
GO:0050851	antigen receptor-mediated signaling pathway	13/240	325/18866	0.000283596	0.00205828	0.00138912	FCGR2B/THEMIS2/PTPRC/BLNK/MNDA/LYN/IGKC/PTPN6/NCKAP1L/TNFRSF21/SYK/BTK/CD300A	13	GO
GO:0071496	cellular response to external stimulus	13/240	326/18866	0.000292098	0.00211528	0.0014276	P2RX7/HMOX1/PTPRC/LPL/AIF1/LYN/CASP1/MMP7/TLR8/SFRP2/ICAM1/ITGA4/FOLR2	13	GO
GO:0009306	protein secretion	16/240	462/18866	0.000297522	0.00214979	0.00145089	FCGR2B/TNFSF13B/CD14/APOE/CLEC5A/P2RX7/PLEK/TREM2/LYN/FGR/ALOX5/TLR1/TLR8/SYK/TIAM1/NR1H3	16	GO
GO:0035592	establishment of protein localization to extracellular region	16/240	463/18866	0.000304731	0.00218964	0.00147778	FCGR2B/TNFSF13B/CD14/APOE/CLEC5A/P2RX7/PLEK/TREM2/LYN/FGR/ALOX5/TLR1/TLR8/SYK/TIAM1/NR1H3	16	GO
GO:0002507	tolerance induction	4/240	26/18866	0.000306384	0.00218964	0.00147778	TNFAIP3/LYN/LGALS9/LILRB2	4	GO
GO:0097066	response to thyroid hormone	4/240	26/18866	0.000306384	0.00218964	0.00147778	CTSS/CTSB/CTSH/CTSL	4	GO
GO:1905523	positive regulation of macrophage migration	4/240	26/18866	0.000306384	0.00218964	0.00147778	C3AR1/C5AR1/CSF1R/TREM2	4	GO
GO:0030838	positive regulation of actin filament polymerization	7/240	101/18866	0.000307973	0.00218964	0.00147778	HCK/CORO1A/GMFG/CCL21/NCKAP1L/ICAM1/IQGAP2	7	GO
GO:0032637	interleukin-8 production	7/240	101/18866	0.000307973	0.00218964	0.00147778	CD14/CHI3L1/PTPRC/LGALS9/TLR1/TLR8/SYK	7	GO
GO:0061515	myeloid cell development	6/240	72/18866	0.000308601	0.00218964	0.00147778	TYROBP/EVI2B/PTPN6/NCKAP1L/LILRB1/ZNF385A	6	GO
GO:0001820	serotonin secretion	3/240	11/18866	0.000311081	0.00218964	0.00147778	FCER1G/SYK/LILRB1	3	GO
GO:0002604	regulation of dendritic cell antigen processing and presentation	3/240	11/18866	0.000311081	0.00218964	0.00147778	CCL19/FCGR2B/CCL21	3	GO
GO:0070339	response to bacterial lipopeptide	3/240	11/18866	0.000311081	0.00218964	0.00147778	CD14/CD36/TLR1	3	GO
GO:0071220	cellular response to bacterial lipoprotein	3/240	11/18866	0.000311081	0.00218964	0.00147778	CD14/CD36/TLR1	3	GO
GO:0071221	cellular response to bacterial lipopeptide	3/240	11/18866	0.000311081	0.00218964	0.00147778	CD14/CD36/TLR1	3	GO
GO:0007249	I-kappaB kinase/NF-kappaB signaling	12/240	286/18866	0.000315149	0.0022135	0.00149388	CCL19/CD14/LY96/TNFAIP3/HMOX1/CASP1/CCL21/LGALS9/TNFSF10/CD36/TLR8/BTK	12	GO
GO:1902903	regulation of supramolecular fiber organization	14/240	373/18866	0.000318504	0.00223226	0.00150654	APOE/CAPG/HCK/CORO1A/HCLS1/GMFG/PLEK/CCL21/ARHGAP18/NCKAP1L/CDH5/GPR65/ICAM1/IQGAP2	14	GO
GO:0002709	regulation of T cell mediated immunity	6/240	73/18866	0.000332707	0.00232681	0.00157035	FCGR2B/P2RX7/IL7R/PTPRC/TNFRSF1B/LILRB1	6	GO
GO:1902905	positive regulation of supramolecular fiber organization	10/240	208/18866	0.000343414	0.00239656	0.00161743	APOE/HCK/CORO1A/GMFG/PLEK/CCL21/NCKAP1L/GPR65/ICAM1/IQGAP2	10	GO
GO:0043370	regulation of CD4-positive alpha-beta T cell differentiation	5/240	48/18866	0.000350294	0.00243936	0.00164632	CCL19/CD86/CD83/LGALS9/NCKAP1L	5	GO
GO:0048143	astrocyte activation	4/240	27/18866	0.000356099	0.00247451	0.00167004	C1QA/C5AR1/TREM2/GRN	4	GO
GO:0071692	protein localization to extracellular region	16/240	470/18866	0.000359562	0.00249327	0.0016827	FCGR2B/TNFSF13B/CD14/APOE/CLEC5A/P2RX7/PLEK/TREM2/LYN/FGR/ALOX5/TLR1/TLR8/SYK/TIAM1/NR1H3	16	GO
GO:0070838	divalent metal ion transport	16/240	471/18866	0.000368052	0.00254673	0.00171878	CCL19/CXCR4/CCR1/P2RX7/CCL8/CORO1A/PTPRC/LYN/CCL21/PTPN6/CEMIP/ARRB2/LILRB2/LILRB1/ICAM1/CD84	16	GO
GO:0032663	regulation of interleukin-2 production	5/240	49/18866	0.000386097	0.00266594	0.00179924	VSIG4/TNFAIP3/CD86/CD83/PTPRC	5	GO
GO:0030301	cholesterol transport	7/240	105/18866	0.000390446	0.00268462	0.00181184	APOE/PLTP/APOC1/CD36/MSR1/NR1H3/ABCA1	7	GO
GO:1902106	negative regulation of leukocyte differentiation	7/240	105/18866	0.000390446	0.00268462	0.00181184	FCGR2B/C1QC/TMEM176A/MAFB/LYN/TMEM176B/LILRB1	7	GO
GO:0002791	regulation of peptide secretion	14/240	381/18866	0.00039407	0.00270385	0.00182482	FCGR2B/CD14/APOE/CLEC5A/P2RX7/TREM2/LYN/FGR/ALOX5/TLR1/TLR8/SYK/TIAM1/NR1H3	14	GO
GO:0015718	monocarboxylic acid transport	9/240	174/18866	0.000398221	0.00272661	0.00184018	APOE/AQP9/P2RX7/SLC16A6/SLCO2B1/CD36/SYK/ACSL5/SLCO2A1	9	GO
GO:0001821	histamine secretion	3/240	12/18866	0.000410885	0.00276989	0.00186939	VAMP8/LYN/BTK	3	GO
GO:0002468	dendritic cell antigen processing and presentation	3/240	12/18866	0.000410885	0.00276989	0.00186939	CCL19/FCGR2B/CCL21	3	GO
GO:0002923	regulation of humoral immune response mediated by circulating immunoglobulin	3/240	12/18866	0.000410885	0.00276989	0.00186939	FCGR2B/PTPRC/PTPN6	3	GO
GO:0006002	fructose 6-phosphate metabolic process	3/240	12/18866	0.000410885	0.00276989	0.00186939	FBP1/HK2/HK3	3	GO
GO:0032490	detection of molecule of bacterial origin	3/240	12/18866	0.000410885	0.00276989	0.00186939	LY96/TREM2/TLR1	3	GO
GO:0033700	phospholipid efflux	3/240	12/18866	0.000410885	0.00276989	0.00186939	APOE/APOC1/ABCA1	3	GO
GO:0042492	gamma-delta T cell differentiation	3/240	12/18866	0.000410885	0.00276989	0.00186939	PTPRC/NCKAP1L/SYK	3	GO
GO:0002335	mature B cell differentiation	4/240	28/18866	0.000411327	0.00276989	0.00186939	FCGR2B/SLAMF8/GPR183/CMTM7	4	GO
GO:2000379	positive regulation of reactive oxygen species metabolic process	7/240	106/18866	0.000413598	0.00277945	0.00187584	TYROBP/ITGAM/ITGB2/AIF1/CD36/SYK/ICAM1	7	GO
GO:0045806	negative regulation of endocytosis	5/240	50/18866	0.000424595	0.00284165	0.00191782	APOC1/LILRB1/NR1H3/CD300A/MCTP1	5	GO
GO:0046850	regulation of bone remodeling	5/240	50/18866	0.000424595	0.00284165	0.00191782	SPP1/P2RX7/CSF1R/TNFAIP3/SYK	5	GO
GO:0097553	calcium ion transmembrane import into cytosol	8/240	140/18866	0.000431201	0.00287996	0.00194367	CCL19/P2RX7/CORO1A/PTPRC/LYN/CCL21/PTPN6/CEMIP	8	GO
GO:1903426	regulation of reactive oxygen species biosynthetic process	7/240	107/18866	0.000437835	0.0029183	0.00196955	ACP5/ITGB2/AIF1/CD36/ALOX5/ICAM1/GLA	7	GO
GO:0051897	positive regulation of protein kinase B signaling	9/240	178/18866	0.000469959	0.00312325	0.00210787	CCL19/CHI3L1/PIK3AP1/RAC2/CD86/HCLS1/CCL21/ARRB2/VAV1	9	GO
GO:0001782	B cell homeostasis	4/240	29/18866	0.000472408	0.00312325	0.00210787	TNFSF13B/TNFAIP3/LYN/NCKAP1L	4	GO
GO:0032373	positive regulation of sterol transport	4/240	29/18866	0.000472408	0.00312325	0.00210787	APOE/PLTP/NR1H3/ABCA1	4	GO
GO:0032376	positive regulation of cholesterol transport	4/240	29/18866	0.000472408	0.00312325	0.00210787	APOE/PLTP/NR1H3/ABCA1	4	GO
GO:0001912	positive regulation of leukocyte mediated cytotoxicity	5/240	52/18866	0.000510198	0.00335273	0.00226275	TYROBP/ITGAM/P2RX7/PTPRC/VAV1	5	GO
GO:0010883	regulation of lipid storage	5/240	52/18866	0.000510198	0.00335273	0.00226275	LPL/CD36/MSR1/NR1H3/ABCA1	5	GO
GO:0048260	positive regulation of receptor-mediated endocytosis	5/240	52/18866	0.000510198	0.00335273	0.00226275	CCL19/CCL21/DAB2/ARRB2/SYK	5	GO
GO:0002430	complement receptor mediated signaling pathway	3/240	13/18866	0.000529144	0.00341538	0.00230503	C3AR1/C5AR1/FPR3	3	GO
GO:0002679	respiratory burst involved in defense response	3/240	13/18866	0.000529144	0.00341538	0.00230503	SLAMF8/HCK/GRN	3	GO
GO:0002921	negative regulation of humoral immune response	3/240	13/18866	0.000529144	0.00341538	0.00230503	FCGR2B/VSIG4/PTPN6	3	GO
GO:0032493	response to bacterial lipoprotein	3/240	13/18866	0.000529144	0.00341538	0.00230503	CD14/CD36/TLR1	3	GO
GO:0045579	positive regulation of B cell differentiation	3/240	13/18866	0.000529144	0.00341538	0.00230503	NCKAP1L/SYK/BTK	3	GO
GO:0046348	amino sugar catabolic process	3/240	13/18866	0.000529144	0.00341538	0.00230503	CHI3L1/NPL/CHIT1	3	GO
GO:0061043	regulation of vascular wound healing	3/240	13/18866	0.000529144	0.00341538	0.00230503	CXCR4/TNFAIP3/ALOX5	3	GO
GO:1905155	positive regulation of membrane invagination	3/240	13/18866	0.000529144	0.00341538	0.00230503	TREM2/CD36/NCKAP1L	3	GO
GO:0010950	positive regulation of endopeptidase activity	9/240	181/18866	0.000530464	0.00341715	0.00230622	S100A9/LGMN/LYN/CASP1/LGALS9/TNFSF10/CTSH/SFRP2/SYK	9	GO
GO:0010758	regulation of macrophage chemotaxis	4/240	30/18866	0.000539683	0.00345609	0.0023325	SLAMF8/C3AR1/C5AR1/CSF1R	4	GO
GO:0044788	modulation by host of viral process	4/240	30/18866	0.000539683	0.00345609	0.0023325	APOE/CSF1R/CCL8/IFI27	4	GO
GO:0061082	myeloid leukocyte cytokine production	4/240	30/18866	0.000539683	0.00345609	0.0023325	FCER1G/HMOX1/CD36/LILRB1	4	GO
GO:1901224	positive regulation of NIK/NF-kappaB signaling	6/240	80/18866	0.000545523	0.00348522	0.00235216	CCL19/CD14/CHI3L1/CD86/TREM2/LGALS9	6	GO
GO:0002526	acute inflammatory response	7/240	111/18866	0.000546366	0.00348522	0.00235216	FCGR2B/FCER1G/TREM1/CD163/BTK/ICAM1/VNN1	7	GO
GO:0019722	calcium-mediated signaling	10/240	222/18866	0.00057269	0.00364602	0.00246068	CXCR4/CCR1/P2RX7/PLEK/TREM2/PTPRC/CXCL8/SYK/BTK/MCTP1	10	GO
GO:0001959	regulation of cytokine-mediated signaling pathway	9/240	183/18866	0.000574243	0.00364879	0.00246255	MMP12/CXCR4/TNFAIP3/TREM2/PTPRC/CASP1/PTPN6/SYK/NR1H3	9	GO
GO:0019915	lipid storage	6/240	81/18866	0.00058299	0.00369718	0.00249521	APOE/LPL/CD36/MSR1/NR1H3/ABCA1	6	GO
GO:1901342	regulation of vasculature development	15/240	444/18866	0.000592314	0.00374903	0.0025302	CXCR4/C3AR1/ITGB2/CHI3L1/C5AR1/TNFAIP3/CYP1B1/HK2/HMOX1/GRN/ALOX5/CTSH/CDH5/CXCL8/SFRP2	15	GO
GO:0042063	gliogenesis	12/240	307/18866	0.000593616	0.00375	0.00253086	CXCR4/C1QA/C5AR1/CSF1R/GPR183/S100A9/TREM2/LYN/TNFRSF1B/GRN/TNFRSF21/TIAM1	12	GO
GO:0032757	positive regulation of interleukin-8 production	5/240	54/18866	0.000608167	0.00383451	0.00258789	CD14/LGALS9/TLR1/TLR8/SYK	5	GO
GO:2000406	positive regulation of T cell migration	4/240	31/18866	0.000613497	0.00386066	0.00260554	AIF1/CCL21/DOCK8/ITGA4	4	GO
GO:0002718	regulation of cytokine production involved in immune response	6/240	83/18866	0.000663898	0.00416979	0.00281417	FCER1G/HMOX1/TNFRSF1B/CD36/LILRB1/BTK	6	GO
GO:1903532	positive regulation of secretion by cell	12/240	313/18866	0.00070354	0.00441029	0.00297649	SPP1/VAMP8/CD14/FCER1G/CLEC5A/ITGAM/ITGB2/P2RX7/TREM2/FGR/SYK/KMO	12	GO
GO:0140029	exocytic process	6/240	84/18866	0.000707479	0.00442649	0.00298742	VAMP8/FCER1G/PLEK/LYN/SYK/BTK	6	GO
GO:1904892	regulation of receptor signaling pathway via STAT	8/240	151/18866	0.000711704	0.00444441	0.00299951	CSF1R/CYP1B1/HCLS1/IL10RA/IL7R/PTPRC/LYN/CD300A	8	GO
GO:0032970	regulation of actin filament-based process	14/240	405/18866	0.000719155	0.0044596	0.00300977	CAPG/HCK/CSF1R/CORO1A/RAC2/HCLS1/GMFG/PLEK/CCL21/ARHGAP18/NCKAP1L/GPR65/ICAM1/IQGAP2	14	GO
GO:0002712	regulation of B cell mediated immunity	5/240	56/18866	0.000719599	0.0044596	0.00300977	FCGR2B/FCER1G/PTPRC/PTPN6/BTK	5	GO
GO:0002889	regulation of immunoglobulin mediated immune response	5/240	56/18866	0.000719599	0.0044596	0.00300977	FCGR2B/FCER1G/PTPRC/PTPN6/BTK	5	GO
GO:0050732	negative regulation of peptidyl-tyrosine phosphorylation	5/240	56/18866	0.000719599	0.0044596	0.00300977	PTPRC/PTPN6/SFRP2/SAMSN1/CD300A	5	GO
GO:1905517	macrophage migration	5/240	57/18866	0.000780715	0.00482878	0.00325892	SLAMF8/C3AR1/C5AR1/CSF1R/TREM2	5	GO
GO:0043552	positive regulation of phosphatidylinositol 3-kinase activity	4/240	33/18866	0.000782126	0.00482878	0.00325892	CCL19/LYN/CCL21/FGR	4	GO
GO:0034109	homotypic cell-cell adhesion	6/240	86/18866	0.000801258	0.00493756	0.00333234	FERMT3/PLEK/LYN/PLAUR/PTPN6/SYK	6	GO
GO:0002864	regulation of acute inflammatory response to antigenic stimulus	3/240	15/18866	0.000826128	0.00504324	0.00340367	FCGR2B/FCER1G/BTK	3	GO
GO:0023035	CD40 signaling pathway	3/240	15/18866	0.000826128	0.00504324	0.00340367	TNFAIP3/CD86/TREM2	3	GO
GO:0030852	regulation of granulocyte differentiation	3/240	15/18866	0.000826128	0.00504324	0.00340367	C1QC/EVI2B/HCLS1	3	GO
GO:0051608	histamine transport	3/240	15/18866	0.000826128	0.00504324	0.00340367	VAMP8/LYN/BTK	3	GO
GO:0090594	inflammatory response to wounding	3/240	15/18866	0.000826128	0.00504324	0.00340367	HMOX1/GRN/ALOX5	3	GO
GO:2001234	negative regulation of apoptotic signaling pathway	10/240	233/18866	0.000831227	0.0050649	0.00341828	MMP9/TNFAIP3/HMOX1/PLAUR/TNFSF10/ARRB2/SFRP2/ICAM1/ZNF385A/VNN1	10	GO
GO:0002763	positive regulation of myeloid leukocyte differentiation	5/240	58/18866	0.000845622	0.00513346	0.00346455	TYROBP/EVI2B/CCR1/HCLS1/TREM2	5	GO
GO:0035306	positive regulation of dephosphorylation	5/240	58/18866	0.000845622	0.00513346	0.00346455	PLEK/PTPRC/CDH5/LILRB2/CD300A	5	GO
GO:0070232	regulation of T cell apoptotic process	4/240	34/18866	0.000877638	0.00531793	0.00358905	IL7R/LGALS9/GIMAP8/DOCK8	4	GO
GO:0046394	carboxylic acid biosynthetic process	13/240	367/18866	0.000886832	0.00536369	0.00361994	APOC1/ALOX5AP/BCAT1/LPL/CEMIP/KYNU/ALOX5/SYK/OSBPL3/HPGDS/SLC1A3/NR1H3/KMO	13	GO
GO:0050731	positive regulation of peptidyl-tyrosine phosphorylation	9/240	195/18866	0.000903415	0.00544948	0.00367783	CSF1R/HCLS1/TREM2/PTPRC/LYN/ARRB2/CD36/SYK/ICAM1	9	GO
GO:0014068	positive regulation of phosphatidylinositol 3-kinase signaling	6/240	88/18866	0.000904353	0.00544948	0.00367783	PIK3AP1/HCLS1/LYN/PTPN6/FGR/HCST	6	GO
GO:0016053	organic acid biosynthetic process	13/240	368/18866	0.000909132	0.00546819	0.00369046	APOC1/ALOX5AP/BCAT1/LPL/CEMIP/KYNU/ALOX5/SYK/OSBPL3/HPGDS/SLC1A3/NR1H3/KMO	13	GO
GO:0060759	regulation of response to cytokine stimulus	9/240	196/18866	0.000936624	0.00562319	0.00379507	MMP12/CXCR4/TNFAIP3/TREM2/PTPRC/CASP1/PTPN6/SYK/NR1H3	9	GO
GO:0060402	calcium ion transport into cytosol	8/240	158/18866	0.000956211	0.00573025	0.00386732	CCL19/P2RX7/CORO1A/PTPRC/LYN/CCL21/PTPN6/CEMIP	8	GO
GO:0052547	regulation of peptidase activity	15/240	466/18866	0.000967401	0.00578669	0.00390541	MMP9/RARRES1/S100A9/LGMN/LYN/CASP1/PLAUR/LGALS9/GRN/TNFSF10/ARRB2/CTSH/SFRP2/SYK/RPS6KA1	15	GO
GO:0098751	bone cell development	4/240	35/18866	0.00098108	0.00585778	0.00395339	TYROBP/PTPN6/LILRB1/ZNF385A	4	GO
GO:0045953	negative regulation of natural killer cell mediated cytotoxicity	3/240	16/18866	0.00100726	0.00600313	0.00405149	LGALS9/ARRB2/LILRB1	3	GO
GO:0046427	positive regulation of receptor signaling pathway via JAK-STAT	6/240	90/18866	0.00101737	0.00605234	0.0040847	CSF1R/CYP1B1/HCLS1/IL10RA/LYN/CD300A	6	GO
GO:0060249	anatomical structure homeostasis	15/240	469/18866	0.00103151	0.00612529	0.00413393	SPP1/ACP5/P2RX7/LIPA/SNX10/CSF1R/TNFAIP3/LYZ/CORO1A/RAC2/IGKC/CTSH/CDH5/SYK/CTSK	15	GO
GO:1902041	regulation of extrinsic apoptotic signaling pathway via death domain receptors	5/240	61/18866	0.00106456	0.00631005	0.00425863	TNFAIP3/HMOX1/TNFSF10/SFRP2/ICAM1	5	GO
GO:0043270	positive regulation of ion transport	11/240	284/18866	0.00107353	0.0063517	0.00428674	VAMP8/CTSS/APOE/CCR1/P2RX7/TREM2/CEMIP/ARRB2/ACSL5/GLRX/KMO	11	GO
GO:0045921	positive regulation of exocytosis	6/240	91/18866	0.0010778	0.00636543	0.00429601	VAMP8/FCER1G/ITGAM/ITGB2/FGR/SYK	6	GO
GO:0046633	alpha-beta T cell proliferation	4/240	36/18866	0.0010928	0.0064424	0.00434795	PTPRC/LGALS9/SYK/DOCK2	4	GO
GO:0070527	platelet aggregation	5/240	62/18866	0.0011461	0.00674443	0.00455179	FERMT3/PLEK/LYN/PTPN6/SYK	5	GO
GO:0032677	regulation of interleukin-8 production	6/240	93/18866	0.00120688	0.00706266	0.00476656	CD14/PTPRC/LGALS9/TLR1/TLR8/SYK	6	GO
GO:0002716	negative regulation of natural killer cell mediated immunity	3/240	17/18866	0.00121167	0.00706266	0.00476656	LGALS9/ARRB2/LILRB1	3	GO
GO:0044764	multi-organism cellular process	3/240	17/18866	0.00121167	0.00706266	0.00476656	CXCR4/SIGLEC1/CTSL	3	GO
GO:0060263	regulation of respiratory burst	3/240	17/18866	0.00121167	0.00706266	0.00476656	SLAMF8/RAC2/GRN	3	GO
GO:2001267	regulation of cysteine-type endopeptidase activity involved in apoptotic signaling pathway	3/240	17/18866	0.00121167	0.00706266	0.00476656	MMP9/PLAUR/LGALS9	3	GO
GO:0090218	positive regulation of lipid kinase activity	4/240	37/18866	0.00121315	0.00706266	0.00476656	CCL19/LYN/CCL21/FGR	4	GO
GO:0051402	neuron apoptotic process	10/240	245/18866	0.00121569	0.00706487	0.00476805	TYROBP/APOE/ITGAM/C5AR1/CORO1A/HMOX1/LGMN/GRN/ARRB2/TNFRSF21	10	GO
GO:0014013	regulation of gliogenesis	7/240	128/18866	0.00126798	0.00734258	0.00495548	CXCR4/GPR183/TREM2/LYN/TNFRSF1B/TNFRSF21/TIAM1	7	GO
GO:1904035	regulation of epithelial cell apoptotic process	6/240	94/18866	0.00127569	0.00737418	0.0049768	TNFAIP3/HMOX1/ARRB2/CDH5/ICAM1/ITGA4	6	GO
GO:0033344	cholesterol efflux	5/240	64/18866	0.00132294	0.00762034	0.00514294	APOE/PLTP/APOC1/NR1H3/ABCA1	5	GO
GO:0060135	maternal process involved in female pregnancy	5/240	64/18866	0.00132294	0.00762034	0.00514294	SPP1/CTSB/LGALS9/MMP7/PRDM1	5	GO
GO:0043029	T cell homeostasis	4/240	38/18866	0.00134248	0.0077057	0.00520054	P2RX7/CORO1A/LGALS9/NCKAP1L	4	GO
GO:2000403	positive regulation of lymphocyte migration	4/240	38/18866	0.00134248	0.0077057	0.00520054	AIF1/CCL21/DOCK8/ITGA4	4	GO
GO:0051668	localization within membrane	6/240	95/18866	0.00134747	0.00772076	0.00521071	APOE/ITGB2/PTPRC/ITGAL/ITGA4/DOCK2	6	GO
GO:0052548	regulation of endopeptidase activity	14/240	434/18866	0.00139125	0.00795767	0.0053706	MMP9/RARRES1/S100A9/LGMN/LYN/CASP1/PLAUR/LGALS9/TNFSF10/ARRB2/CTSH/SFRP2/SYK/RPS6KA1	14	GO
GO:0051047	positive regulation of secretion	12/240	340/18866	0.00143196	0.00817622	0.0055181	SPP1/VAMP8/CD14/FCER1G/CLEC5A/ITGAM/ITGB2/P2RX7/TREM2/FGR/SYK/KMO	12	GO
GO:0034375	high-density lipoprotein particle remodeling	3/240	18/18866	0.00144041	0.00821011	0.00554097	APOE/PLTP/APOC1	3	GO
GO:0006766	vitamin metabolic process	7/240	131/18866	0.00144987	0.00824962	0.00556763	ACP5/PLTP/LGMN/SLC2A3/VNN1/TCN2/FOLR2	7	GO
GO:0016601	Rac protein signal transduction	4/240	39/18866	0.00148113	0.00839824	0.00566794	RAC2/AIF1/ELMO1/TIAM1	4	GO
GO:0032691	negative regulation of interleukin-1 beta production	4/240	39/18866	0.00148113	0.00839824	0.00566794	ACP5/TNFAIP3/TREM2/ARRB2	4	GO
GO:0043405	regulation of MAP kinase activity	12/240	342/18866	0.00150446	0.00851572	0.00574723	CCL19/CXCR4/APOE/C5AR1/P2RX7/PTPRC/LYN/PTPN6/SFRP2/SYK/TIAM1/CD300A	12	GO
GO:0031668	cellular response to extracellular stimulus	10/240	253/18866	0.00154472	0.00872846	0.0058908	P2RX7/HMOX1/PTPRC/LPL/AIF1/LYN/SFRP2/ICAM1/ITGA4/FOLR2	10	GO
GO:0070555	response to interleukin-1	9/240	211/18866	0.0015655	0.00883063	0.00595976	CCL18/CCL19/CHI3L1/CCL8/CCL21/LGALS9/CXCL8/ICAM1/KMO	9	GO
GO:0007584	response to nutrient	8/240	171/18866	0.00158612	0.00893147	0.00602781	SPP1/HMOX1/LPL/KYNU/SFRP2/C2/ABCA1/FOLR2	8	GO
GO:0045670	regulation of osteoclast differentiation	5/240	67/18866	0.0016249	0.00913415	0.0061646	TYROBP/CCR1/MAFB/TREM2/LILRB1	5	GO
GO:0010744	positive regulation of macrophage derived foam cell differentiation	3/240	19/18866	0.00169452	0.00942811	0.006363	LPL/CD36/MSR1	3	GO
GO:0010759	positive regulation of macrophage chemotaxis	3/240	19/18866	0.00169452	0.00942811	0.006363	C3AR1/C5AR1/CSF1R	3	GO
GO:0061081	positive regulation of myeloid leukocyte cytokine production involved in immune response	3/240	19/18866	0.00169452	0.00942811	0.006363	FCER1G/CD36/LILRB1	3	GO
GO:0071800	podosome assembly	3/240	19/18866	0.00169452	0.00942811	0.006363	HCK/LCP1/BIN2	3	GO
GO:0150079	negative regulation of neuroinflammatory response	3/240	19/18866	0.00169452	0.00942811	0.006363	PTPRC/TNFRSF1B/GRN	3	GO
GO:1903975	regulation of glial cell migration	3/240	19/18866	0.00169452	0.00942811	0.006363	GPR183/TREM2/TIAM1	3	GO
GO:0043523	regulation of neuron apoptotic process	9/240	214/18866	0.00172473	0.0095799	0.00646544	TYROBP/APOE/ITGAM/C5AR1/CORO1A/HMOX1/LGMN/GRN/ARRB2	9	GO
GO:0097696	receptor signaling pathway via STAT	8/240	174/18866	0.00176999	0.00981456	0.00662381	CSF1R/CYP1B1/HCLS1/IL10RA/IL7R/PTPRC/LYN/CD300A	8	GO
GO:0051607	defense response to virus	10/240	258/18866	0.00178474	0.0098631	0.00665657	MMP12/RNASE6/TNFAIP3/PTPRC/IFI27/TLR8/LILRB1/OAS1/IFITM1/MX2	10	GO
GO:0030890	positive regulation of B cell proliferation	4/240	41/18866	0.0017878	0.0098631	0.00665657	TNFSF13B/GPR183/PTPRC/NCKAP1L	4	GO
GO:0042269	regulation of natural killer cell mediated cytotoxicity	4/240	41/18866	0.0017878	0.0098631	0.00665657	LGALS9/ARRB2/VAV1/LILRB1	4	GO
hsa05150	Staphylococcus aureus infection	17/155	96/8108	2.14359e-12	4.2443e-10	3.2041e-10	2213/713/714/719/3684/3108/3109/712/3689/728/3426/2359/2212/717/3383/3683/6404	17	KEGG
hsa04610	Complement and coagulation cascades	14/155	85/8108	5.6964e-10	5.63943e-08	4.25731e-08	713/714/719/3684/712/3689/11326/2162/728/3426/5329/5328/730/717	14	KEGG
hsa04064	NF-kappa B signaling pathway	15/155	104/8108	9.29711e-10	6.13609e-08	4.63225e-08	6363/10673/929/23643/597/7128/29760/4067/6366/5328/3576/6850/2920/695/3383	15	KEGG
hsa04062	Chemokine signaling pathway	18/155	192/8108	2.16046e-08	1.06231e-06	8.0196e-07	6362/6363/7852/1230/3055/58191/6355/5880/4067/6366/2268/409/3576/7409/9844/2920/7074/1794	18	KEGG
hsa04145	Phagosome	16/155	152/8108	2.68261e-08	1.06231e-06	8.0196e-07	2213/1520/929/4688/3684/3108/3109/3689/4360/8685/11151/4689/948/1514/4481/2212	16	KEGG
hsa04662	B cell receptor signaling pathway	12/155	82/8108	4.06664e-08	1.31899e-06	9.95725e-07	2213/118788/5880/29760/4067/5777/10288/6850/7409/10859/695/8519	12	KEGG
hsa04061	Viral protein interaction with cytokine and cytokine receptor	13/155	100/8108	4.66308e-08	1.31899e-06	9.95725e-07	6362/6363/7852/1230/1436/6355/3587/7133/3561/6366/8743/3576/2920	13	KEGG
hsa04380	Osteoclast differentiation	14/155	128/8108	1.28555e-07	3.18173e-06	2.40194e-06	54/2213/7305/4688/1436/54209/29760/4689/10288/6850/2212/10859/695/1513	14	KEGG
hsa05323	Rheumatoid arthritis	12/155	93/8108	1.7064e-07	3.40078e-06	2.56731e-06	54/10673/3108/3109/3689/942/1514/3576/2920/3383/3683/1513	12	KEGG
hsa05133	Pertussis	11/155	76/8108	1.71756e-07	3.40078e-06	2.56731e-06	713/714/929/3684/23643/712/3689/3394/834/3576/717	11	KEGG
hsa05152	Tuberculosis	15/155	180/8108	1.58246e-06	2.64281e-05	1.9951e-05	2213/1520/929/2207/3684/3108/3109/3689/4360/11151/3587/4046/7096/6850/2212	15	KEGG
hsa04670	Leukocyte transendothelial migration	12/155	114/8108	1.6017e-06	2.64281e-05	1.9951e-05	4318/7852/4688/3684/3689/5880/4689/1003/7409/3383/3683/3676	12	KEGG
hsa04142	Lysosome	12/155	128/8108	5.4659e-06	8.32499e-05	6.28468e-05	54/1520/7805/1508/3988/1075/5641/1512/1514/4125/2717/1513	12	KEGG
hsa04650	Natural killer cell mediated cytotoxicity	12/155	131/8108	6.95718e-06	9.83944e-05	7.42797e-05	7305/2207/3689/5880/5777/8743/962/10870/6850/7409/3383/3683	12	KEGG
hsa04060	Cytokine-cytokine receptor interaction	18/155	295/8108	1.21782e-05	0.000160752	0.000121355	6362/6363/10673/7852/1439/1230/58191/1436/6355/3587/3575/7133/3561/6366/8743/3576/27242/2920	18	KEGG
hsa05140	Leishmaniasis	9/155	77/8108	1.43758e-05	0.000174097	0.000131429	4688/3684/3108/3109/3689/5777/4689/2212/3676	9	KEGG
hsa04613	Neutrophil extracellular trap formation	14/155	190/8108	1.49477e-05	0.000174097	0.000131429	366/4688/3684/3689/728/2359/5880/834/4689/51311/6850/2212/3683/6404	14	KEGG
hsa04514	Cell adhesion molecules	12/155	149/8108	2.58769e-05	0.000284646	0.000214884	3684/3108/3109/3689/942/5788/6614/1003/3383/3683/6404/3676	12	KEGG
hsa05171	Coronavirus disease - COVID-19	15/155	232/8108	3.47024e-05	0.000361635	0.000273005	713/714/719/712/2162/728/834/730/51311/3576/6850/2212/717/4938/4600	15	KEGG
hsa04979	Cholesterol metabolism	7/155	50/8108	4.08273e-05	0.000392526	0.000296325	348/5360/341/3988/4023/948/19	7	KEGG
hsa04664	Fc epsilon RI signaling pathway	8/155	68/8108	4.16316e-05	0.000392526	0.000296325	2207/241/5880/4067/240/6850/7409/695	8	KEGG
hsa05417	Lipid and atherosclerosis	14/155	215/8108	5.9251e-05	0.000533259	0.000402566	4318/929/4688/23643/4067/834/4689/8743/948/3576/7409/2920/3383/19	14	KEGG
hsa04640	Hematopoietic cell lineage	9/155	99/8108	0.000107866	0.00092859	0.000701009	929/3684/3108/3109/1436/3575/948/951/3676	9	KEGG
hsa05416	Viral myocarditis	7/155	60/8108	0.000134541	0.00110996	0.000837931	3108/3109/3689/5880/942/3383/3683	7	KEGG
hsa04672	Intestinal immune network for IgA production	6/155	49/8108	0.000314199	0.00248846	0.00187858	10673/7852/3108/3109/942/3676	6	KEGG
hsa04666	Fc gamma R-mediated phagocytosis	8/155	97/8108	0.000510022	0.00388401	0.00293211	2213/3055/5880/5788/4067/6850/7409/2212	8	KEGG
hsa05134	Legionellosis	6/155	57/8108	0.000719115	0.00510474	0.00385366	929/3684/3689/834/3576/2920	6	KEGG
hsa05340	Primary immunodeficiency	5/155	38/8108	0.000721882	0.00510474	0.00385366	3575/5788/29760/3561/695	5	KEGG
hsa04620	Toll-like receptor signaling pathway	8/155	104/8108	0.000812273	0.00554586	0.00418667	6696/929/23643/942/7096/51311/3576/1513	8	KEGG
hsa04210	Apoptosis	9/155	136/8108	0.001145	0.0073132	0.00552086	1520/1439/597/1508/1075/8743/1512/1514/1513	9	KEGG
hsa05322	Systemic lupus erythematosus	9/155	136/8108	0.001145	0.0073132	0.00552086	713/714/3108/3109/712/942/730/2212/717	9	KEGG
