# Supplementary material for: Bioinformatic Analysis Revealed the Essential Regulatory Genes and Pathways of Early and Advanced Atherosclerotic Plaque in Humans
Source: Cells. 2022 Dec 8;11(24):3976. doi: 10.3390/cells11243976 (PMC9776921; doi:10.3390/cells11243976)
Supplement: Supplementary file 1 [file cells-11-03976-s001.zip › Table S3.xlsx]

## Sheet: GO and KEGG
Table S3 The GO and KEGG analysis of the 218 common downregulated genes
ID	Description	GeneRatio	BgRatio	pvalue	p.adjust	qvalue	geneID	Count	Type
GO:0003012	muscle system process	33/196	467/18866	2.28699e-18	5.62143e-15	4.85806e-15	ATP1A2/CASQ2/CNN1/MYOCD/SLMAP/SMPX/LMOD1/MYOZ2/NPNT/PLN/SYNM/HSPB6/VCL/CRYAB/KCNMA1/KCNA5/TMOD1/SMTN/MYH11/ACTN2/CAMK2G/LMCD1/HEY2/CKMT2/SORBS1/TPM2/ACTG2/MYOM1/DES/MYL9/FXYD1/RYR2/MYOZ1	33	GO
GO:0006936	muscle contraction	28/196	362/18866	1.05792e-16	1.30018e-13	1.12362e-13	ATP1A2/CASQ2/CNN1/MYOCD/SLMAP/SMPX/LMOD1/NPNT/PLN/SYNM/HSPB6/VCL/CRYAB/KCNMA1/KCNA5/TMOD1/SMTN/MYH11/ACTN2/CKMT2/SORBS1/TPM2/ACTG2/MYOM1/DES/MYL9/FXYD1/RYR2	28	GO
GO:0060537	muscle tissue development	21/196	409/18866	1.87237e-09	1.5341e-06	1.32577e-06	MYOCD/CFL2/MYOZ2/PLN/OSR1/HLF/PKD2/MYH11/ACTN2/SVIL/YAP1/CSRP1/KCNAB1/HEY2/SGCB/MEIS1/BVES/MYOM1/RYR2/MYOZ1/JPH2	21	GO
GO:0007517	muscle organ development	20/196	407/18866	9.77808e-09	6.00863e-06	5.19268e-06	MYOCD/CFL2/MYOZ2/CRYAB/ITGA7/HLF/SMTN/SVIL/YAP1/KCNAB1/HEY2/SGCB/MEIS1/BVES/FHL1/MYOM1/SGCE/RYR2/MYOZ1/JPH2	20	GO
GO:0031032	actomyosin structure organization	14/196	200/18866	2.33329e-08	1.00543e-05	8.68897e-06	CASQ2/CNN1/CFL2/LMOD1/MYOZ2/TMOD1/MYH11/PFN2/ACTN2/CSRP1/LIMCH1/SORBS1/LPAR1/MYOZ1	14	GO
GO:0055002	striated muscle cell development	13/196	169/18866	2.45427e-08	1.00543e-05	8.68897e-06	CASQ2/CFL2/LMOD1/MYOZ2/FLNC/TMOD1/MYH11/ACTN2/CSRP1/HEY2/SGCB/BVES/MYOZ1	13	GO
GO:0030239	myofibril assembly	9/196	67/18866	2.98231e-08	1.04722e-05	9.05008e-06	CASQ2/CFL2/LMOD1/MYOZ2/TMOD1/MYH11/ACTN2/CSRP1/MYOZ1	9	GO
GO:0055001	muscle cell development	13/196	183/18866	6.31438e-08	1.94009e-05	1.67664e-05	CASQ2/CFL2/LMOD1/MYOZ2/FLNC/TMOD1/MYH11/ACTN2/CSRP1/HEY2/SGCB/BVES/MYOZ1	13	GO
GO:0051146	striated muscle cell differentiation	16/196	295/18866	8.22705e-08	2.2469e-05	1.94178e-05	CASQ2/MYOCD/CFL2/LMOD1/MYOZ2/FLNC/TMOD1/MYH11/ACTN2/CSRP1/HEY2/SGCB/MYEF2/BVES/MYOZ1/BDNF	16	GO
GO:0032412	regulation of ion transmembrane transporter activity	15/196	265/18866	1.21971e-07	2.99804e-05	2.59092e-05	ATP1A2/CASQ2/SLMAP/PLN/OSR1/PKD2/ACTN2/KCNAB1/FHL1/RGN/FXYD1/NLGN1/RYR2/GRIA2/JPH2	15	GO
GO:0014706	striated muscle tissue development	18/196	389/18866	1.37291e-07	3.06782e-05	2.65122e-05	MYOCD/CFL2/MYOZ2/PLN/HLF/MYH11/ACTN2/SVIL/YAP1/KCNAB1/HEY2/SGCB/MEIS1/BVES/MYOM1/RYR2/MYOZ1/JPH2	18	GO
GO:1904062	regulation of cation transmembrane transport	17/196	349/18866	1.50192e-07	3.07643e-05	2.65866e-05	ATP1A2/CASQ2/SLMAP/PLN/OSR1/PKD2/ACTN2/KCNAB1/TRPC1/KCNMB1/FHL1/RGN/FXYD1/NLGN1/RYR2/GRIA2/JPH2	17	GO
GO:0010959	regulation of metal ion transport	18/196	396/18866	1.78914e-07	3.38286e-05	2.92348e-05	ATP1A2/CASQ2/SLMAP/PLN/CNTN1/OSR1/PKD2/KCNA5/ACTN2/KCNAB1/CAMK2G/TRPC1/KCNMB1/FHL1/RGN/FXYD1/RYR2/JPH2	18	GO
GO:0034765	regulation of ion transmembrane transport	20/196	489/18866	1.98549e-07	3.38466e-05	2.92504e-05	ATP1A2/KCNK17/CASQ2/SLMAP/PLN/OSR1/KCNMA1/PKD2/KCNA5/ACTN2/KCNAB1/TRPC1/KCNMB1/FHL1/RGN/FXYD1/NLGN1/RYR2/GRIA2/JPH2	20	GO
GO:0022898	regulation of transmembrane transporter activity	15/196	276/18866	2.0655e-07	3.38466e-05	2.92504e-05	ATP1A2/CASQ2/SLMAP/PLN/OSR1/PKD2/ACTN2/KCNAB1/FHL1/RGN/FXYD1/NLGN1/RYR2/GRIA2/JPH2	15	GO
GO:0032409	regulation of transporter activity	15/196	291/18866	4.06973e-07	6.25212e-05	5.4031e-05	ATP1A2/CASQ2/SLMAP/PLN/OSR1/PKD2/ACTN2/KCNAB1/FHL1/RGN/FXYD1/NLGN1/RYR2/GRIA2/JPH2	15	GO
GO:0008016	regulation of heart contraction	14/196	256/18866	4.93913e-07	7.1414e-05	6.17161e-05	ATP1A2/CASQ2/PLN/NPR1/THRB/KCNA5/HEY2/TRPC1/RYR3/BVES/DES/FXYD1/RYR2/HSPB7	14	GO
GO:0003015	heart process	15/196	297/18866	5.27444e-07	7.20254e-05	6.22446e-05	ATP1A2/CASQ2/PLN/NPR1/THRB/KCNA5/YAP1/HEY2/TRPC1/RYR3/BVES/DES/FXYD1/RYR2/HSPB7	15	GO
GO:0042692	muscle cell differentiation	17/196	390/18866	7.13995e-07	9.23684e-05	7.9825e-05	CASQ2/MYOCD/CFL2/LMOD1/MYOZ2/NPNT/FLNC/TMOD1/MYH11/ACTN2/CSRP1/HEY2/SGCB/MYEF2/BVES/MYOZ1/BDNF	17	GO
GO:0050848	regulation of calcium-mediated signaling	9/196	100/18866	9.88046e-07	0.000121431	0.000104941	CASQ2/MYOZ2/PLN/PKD2/LMCD1/RCAN2/RGN/MYOZ1/JPH2	9	GO
GO:0060047	heart contraction	14/196	287/18866	1.92291e-06	0.000225072	0.000194508	ATP1A2/CASQ2/PLN/NPR1/THRB/KCNA5/HEY2/TRPC1/RYR3/BVES/DES/FXYD1/RYR2/HSPB7	14	GO
GO:0010927	cellular component assembly involved in morphogenesis	9/196	112/18866	2.56419e-06	0.00028649	0.000247586	CASQ2/CFL2/LMOD1/MYOZ2/TMOD1/MYH11/ACTN2/CSRP1/MYOZ1	9	GO
GO:0007015	actin filament organization	17/196	434/18866	3.05824e-06	0.000326832	0.000282449	CFL2/LMOD1/TMOD1/PFN2/ACTN2/SVIL/CAP2/LIMCH1/SORBS1/DSTN/PDLIM3/SHROOM3/TPM2/NCKAP1/ENAH/LPAR1/SYNPO2	17	GO
GO:1903522	regulation of blood circulation	14/196	303/18866	3.61734e-06	0.000370476	0.000320167	ATP1A2/CASQ2/PLN/NPR1/THRB/KCNA5/HEY2/TRPC1/RYR3/BVES/DES/FXYD1/RYR2/HSPB7	14	GO
GO:0070252	actin-mediated cell contraction	9/196	123/18866	5.56756e-06	0.000547402	0.000473066	ATP1A2/PLN/KCNA5/TMOD1/ACTN2/LIMCH1/TPM2/DES/RYR2	9	GO
GO:0019932	second-messenger-mediated signaling	17/196	456/18866	5.89721e-06	0.000557513	0.000481804	ATP1A2/CASQ2/INPP5A/MYOZ2/PLN/MRAP2/NPR1/PKD2/LMCD1/GNAI1/RCAN2/LPAR1/RGN/RYR2/MYOZ1/ADCY5/JPH2	17	GO
GO:0045214	sarcomere organization	6/196	45/18866	6.77087e-06	0.0006164	0.000532694	CASQ2/CFL2/MYOZ2/ACTN2/CSRP1/MYOZ1	6	GO
GO:0006813	potassium ion transport	12/196	242/18866	8.98529e-06	0.00078878	0.000681666	ATP1A2/KCNK17/CASQ2/KCNMA1/PKD2/KCNA5/ACTN2/KCNAB1/KCNMB1/FHL1/SLC24A3/FXYD1	12	GO
GO:1903779	regulation of cardiac conduction	7/196	73/18866	1.0711e-05	0.000907852	0.000784568	ATP1A2/CASQ2/NPR1/TRPC1/RYR3/FXYD1/RYR2	7	GO
GO:0006937	regulation of muscle contraction	10/196	173/18866	1.36487e-05	0.00111828	0.000966424	ATP1A2/CASQ2/CNN1/MYOCD/NPNT/PLN/HSPB6/KCNMA1/MYL9/RYR2	10	GO
GO:0032413	negative regulation of ion transmembrane transporter activity	7/196	77/18866	1.52652e-05	0.00121038	0.00104602	ATP1A2/CASQ2/PLN/OSR1/PKD2/ACTN2/KCNAB1	7	GO
GO:0090257	regulation of muscle system process	12/196	256/18866	1.57935e-05	0.00121314	0.0010484	ATP1A2/CASQ2/CNN1/MYOCD/NPNT/PLN/HSPB6/KCNMA1/CAMK2G/LMCD1/MYL9/RYR2	12	GO
GO:0071805	potassium ion transmembrane transport	11/196	218/18866	1.81781e-05	0.00135399	0.00117013	ATP1A2/KCNK17/CASQ2/KCNMA1/PKD2/KCNA5/ACTN2/KCNAB1/KCNMB1/FHL1/SLC24A3	11	GO
GO:0030834	regulation of actin filament depolymerization	6/196	54/18866	1.98672e-05	0.00143628	0.00124124	CFL2/LMOD1/TMOD1/ACTN2/SVIL/DSTN	6	GO
GO:0051279	regulation of release of sequestered calcium ion into cytosol	7/196	81/18866	2.1314e-05	0.00146932	0.00126979	ATP1A2/CASQ2/PLN/PKD2/TRPC1/RYR2/JPH2	7	GO
GO:0019722	calcium-mediated signaling	11/196	222/18866	2.15197e-05	0.00146932	0.00126979	ATP1A2/CASQ2/MYOZ2/PLN/PKD2/LMCD1/RCAN2/RGN/RYR2/MYOZ1/JPH2	11	GO
GO:0032970	regulation of actin filament-based process	15/196	405/18866	2.2896e-05	0.00152104	0.00131448	ATP1A2/CFL2/LMOD1/PLN/TMOD1/PFN2/ACTN2/SVIL/LIMCH1/DSTN/NCKAP1/LPAR1/SYNPO2/PAM/RYR2	15	GO
GO:0061337	cardiac conduction	9/196	148/18866	2.48087e-05	0.00160473	0.00138681	ATP1A2/CASQ2/PLN/NPR1/KCNA5/TRPC1/RYR3/FXYD1/RYR2	9	GO
GO:0030042	actin filament depolymerization	6/196	58/18866	3.0081e-05	0.00189588	0.00163842	CFL2/LMOD1/TMOD1/ACTN2/SVIL/DSTN	6	GO
GO:0048738	cardiac muscle tissue development	11/196	231/18866	3.10377e-05	0.00189843	0.00164063	MYOCD/PLN/MYH11/ACTN2/YAP1/HEY2/SGCB/MEIS1/BVES/RYR2/JPH2	11	GO
GO:0030048	actin filament-based movement	9/196	153/18866	3.22655e-05	0.00189843	0.00164063	ATP1A2/PLN/KCNA5/TMOD1/ACTN2/LIMCH1/TPM2/DES/RYR2	9	GO
GO:0051209	release of sequestered calcium ion into cytosol	8/196	118/18866	3.24386e-05	0.00189843	0.00164063	ATP1A2/CASQ2/PLN/PKD2/TRPC1/RYR3/RYR2/JPH2	8	GO
GO:0051283	negative regulation of sequestering of calcium ion	8/196	119/18866	3.44709e-05	0.00197045	0.00170287	ATP1A2/CASQ2/PLN/PKD2/TRPC1/RYR3/RYR2/JPH2	8	GO
GO:0032410	negative regulation of transporter activity	7/196	88/18866	3.66043e-05	0.00199494	0.00172403	ATP1A2/CASQ2/PLN/OSR1/PKD2/ACTN2/KCNAB1	7	GO
GO:1901879	regulation of protein depolymerization	7/196	88/18866	3.66043e-05	0.00199494	0.00172403	CFL2/LMOD1/TMOD1/ACTN2/SVIL/DSTN/MAP1B	7	GO
GO:1902903	regulation of supramolecular fiber organization	14/196	373/18866	3.73341e-05	0.00199494	0.00172403	CFL2/LMOD1/CRYAB/TMOD1/PFN2/ACTN2/MAP2/SVIL/LIMCH1/DSTN/MAP1B/NCKAP1/LPAR1/SYNPO2	14	GO
GO:0051282	regulation of sequestering of calcium ion	8/196	121/18866	3.88558e-05	0.00201677	0.00174289	ATP1A2/CASQ2/PLN/PKD2/TRPC1/RYR3/RYR2/JPH2	8	GO
GO:1901019	regulation of calcium ion transmembrane transporter activity	7/196	89/18866	3.93835e-05	0.00201677	0.00174289	ATP1A2/CASQ2/PLN/PKD2/RGN/RYR2/JPH2	7	GO
GO:0007519	skeletal muscle tissue development	9/196	158/18866	4.15406e-05	0.00208381	0.00180084	MYOCD/CFL2/MYOZ2/HLF/SVIL/KCNAB1/BVES/MYOM1/MYOZ1	9	GO
GO:1904063	negative regulation of cation transmembrane transport	7/196	91/18866	4.54629e-05	0.0022315	0.00192847	ATP1A2/CASQ2/PLN/OSR1/PKD2/ACTN2/KCNAB1	7	GO
GO:0051208	sequestering of calcium ion	8/196	124/18866	4.63004e-05	0.0022315	0.00192847	ATP1A2/CASQ2/PLN/PKD2/TRPC1/RYR3/RYR2/JPH2	8	GO
GO:0034329	cell junction assembly	15/196	434/18866	5.05697e-05	0.00239039	0.00206578	AMIGO2/PCDHB16/VCL/FLNC/SDK1/ACTN2/LRRN1/MPP7/FERMT2/LIMCH1/SORBS1/MAP1B/PCDHB4/NLGN1/BDNF	15	GO
GO:1902905	positive regulation of supramolecular fiber organization	10/196	208/18866	6.59095e-05	0.00304808	0.00263416	CFL2/LMOD1/PFN2/ACTN2/LIMCH1/DSTN/MAP1B/NCKAP1/LPAR1/SYNPO2	10	GO
GO:0060538	skeletal muscle organ development	9/196	168/18866	6.69635e-05	0.00304808	0.00263416	MYOCD/CFL2/MYOZ2/HLF/SVIL/KCNAB1/BVES/MYOM1/MYOZ1	9	GO
GO:0034764	positive regulation of transmembrane transport	10/196	210/18866	7.1395e-05	0.00319071	0.00275742	ITLN1/PKD2/ACTN2/SORBS1/TRPC1/KCNMB1/RGN/FXYD1/RYR2/JPH2	10	GO
GO:0006874	cellular calcium ion homeostasis	15/196	456/18866	8.8037e-05	0.0038179	0.00329944	ATP1A2/CASQ2/PLN/PKD2/KCNA5/MICU3/TRPC1/RYR3/SLC24A3/LPAR1/RGN/SV2A/RYR2/ADCY5/JPH2	15	GO
GO:0010522	regulation of calcium ion transport into cytosol	7/196	101/18866	8.85355e-05	0.0038179	0.00329944	ATP1A2/CASQ2/PLN/PKD2/TRPC1/RYR2/JPH2	7	GO
GO:0034766	negative regulation of ion transmembrane transport	7/196	103/18866	0.000100227	0.0041788	0.00361133	ATP1A2/CASQ2/PLN/OSR1/PKD2/ACTN2/KCNAB1	7	GO
GO:0031589	cell-substrate adhesion	13/196	359/18866	0.000101792	0.0041788	0.00361133	NPNT/VCL/FBLN5/ITGA7/ITGA10/ACTN2/FERMT2/LIMCH1/SORBS1/ATRNL1/SMOC2/BVES/SGCE	13	GO
GO:0010881	regulation of cardiac muscle contraction by regulation of the release of sequestered calcium ion	4/196	24/18866	0.000102005	0.0041788	0.00361133	ATP1A2/CASQ2/PLN/RYR2	4	GO
GO:0060401	cytosolic calcium ion transport	9/196	178/18866	0.00010439	0.00420642	0.0036352	ATP1A2/CASQ2/PLN/PKD2/MICU3/TRPC1/RYR3/RYR2/JPH2	9	GO
GO:0008154	actin polymerization or depolymerization	10/196	221/18866	0.000109015	0.00425465	0.00367688	CFL2/LMOD1/TMOD1/PFN2/ACTN2/SVIL/CAP2/DSTN/NCKAP1/ENAH	10	GO
GO:0097553	calcium ion transmembrane import into cytosol	8/196	140/18866	0.000109049	0.00425465	0.00367688	ATP1A2/CASQ2/PLN/PKD2/TRPC1/RYR3/RYR2/JPH2	8	GO
GO:0055074	calcium ion homeostasis	15/196	468/18866	0.000117303	0.00450515	0.00389337	ATP1A2/CASQ2/PLN/PKD2/KCNA5/MICU3/TRPC1/RYR3/SLC24A3/LPAR1/RGN/SV2A/RYR2/ADCY5/JPH2	15	GO
GO:0048251	elastic fiber assembly	3/196	10/18866	0.000125579	0.00460707	0.00398145	MFAP4/FBLN5/MYH11	3	GO
GO:0071313	cellular response to caffeine	3/196	10/18866	0.000125579	0.00460707	0.00398145	CASQ2/RYR3/RYR2	3	GO
GO:1901894	regulation of ATPase-coupled calcium transmembrane transporter activity	3/196	10/18866	0.000125579	0.00460707	0.00398145	PLN/RGN/RYR2	3	GO
GO:2001257	regulation of cation channel activity	9/196	185/18866	0.000139916	0.00502305	0.00434094	CASQ2/SLMAP/PLN/PKD2/ACTN2/KCNAB1/NLGN1/GRIA2/JPH2	9	GO
GO:0060314	regulation of ryanodine-sensitive calcium-release channel activity	4/196	26/18866	0.0001412	0.00502305	0.00434094	CASQ2/PLN/PKD2/JPH2	4	GO
GO:0006939	smooth muscle contraction	7/196	109/18866	0.000143049	0.00502305	0.00434094	ATP1A2/CNN1/MYOCD/NPNT/KCNMA1/SMTN/MYH11	7	GO
GO:0007160	cell-matrix adhesion	10/196	230/18866	0.000151182	0.00508156	0.0043915	NPNT/VCL/FBLN5/ITGA7/ITGA10/ACTN2/FERMT2/LIMCH1/SORBS1/SGCE	10	GO
GO:0051495	positive regulation of cytoskeleton organization	10/196	230/18866	0.000151182	0.00508156	0.0043915	CFL2/LMOD1/PFN2/ACTN2/LIMCH1/DSTN/MAP1B/NCKAP1/LPAR1/SYNPO2	10	GO
GO:0051592	response to calcium ion	8/196	147/18866	0.000152984	0.00508156	0.0043915	CASQ2/KCNMA1/PKD2/TRPC1/RYR3/KCNMB1/NLGN1/RYR2	8	GO
GO:1904064	positive regulation of cation transmembrane transport	8/196	147/18866	0.000152984	0.00508156	0.0043915	PKD2/ACTN2/TRPC1/KCNMB1/RGN/FXYD1/RYR2/JPH2	8	GO
GO:0110053	regulation of actin filament organization	11/196	278/18866	0.000162713	0.00533265	0.00460849	CFL2/LMOD1/TMOD1/PFN2/ACTN2/SVIL/LIMCH1/DSTN/NCKAP1/LPAR1/SYNPO2	11	GO
GO:1903169	regulation of calcium ion transmembrane transport	8/196	152/18866	0.000192557	0.00622768	0.00538198	ATP1A2/CASQ2/PLN/PKD2/TRPC1/RGN/RYR2/JPH2	8	GO
GO:0051261	protein depolymerization	7/196	115/18866	0.000199633	0.00636899	0.0055041	CFL2/LMOD1/TMOD1/ACTN2/SVIL/DSTN/MAP1B	7	GO
GO:0072503	cellular divalent inorganic cation homeostasis	15/196	492/18866	0.000202108	0.00636899	0.0055041	ATP1A2/CASQ2/PLN/PKD2/KCNA5/MICU3/TRPC1/RYR3/SLC24A3/LPAR1/RGN/SV2A/RYR2/ADCY5/JPH2	15	GO
GO:0010882	regulation of cardiac muscle contraction by calcium ion signaling	4/196	29/18866	0.000218926	0.00681165	0.00588665	ATP1A2/CASQ2/PLN/RYR2	4	GO
GO:0042391	regulation of membrane potential	14/196	443/18866	0.000229114	0.00703954	0.00608359	ATP1A2/KCNK17/CASQ2/SLMAP/PLN/KCNMA1/KCNA5/ACTN2/BVES/FHL1/FXYD1/NLGN1/RYR2/BDNF	14	GO
GO:0060402	calcium ion transport into cytosol	8/196	158/18866	0.000250773	0.00760987	0.00657647	ATP1A2/CASQ2/PLN/PKD2/TRPC1/RYR3/RYR2/JPH2	8	GO
GO:0007179	transforming growth factor beta receptor signaling pathway	9/196	202/18866	0.000269974	0.00809264	0.00699368	BAMBI/MYOCD/NPNT/FERMT2/ASPN/TWSG1/PMEPA1/PRDM16/LTBP4	9	GO
GO:0034767	positive regulation of ion transmembrane transport	8/196	161/18866	0.000284875	0.00826356	0.00714139	PKD2/ACTN2/TRPC1/KCNMB1/RGN/FXYD1/RYR2/JPH2	8	GO
GO:0043244	regulation of protein-containing complex disassembly	7/196	122/18866	0.000287168	0.00826356	0.00714139	CFL2/LMOD1/TMOD1/ACTN2/SVIL/DSTN/MAP1B	7	GO
GO:0005513	detection of calcium ion	3/196	13/18866	0.000292486	0.00826356	0.00714139	CASQ2/KCNMB1/RYR2	3	GO
GO:0051481	negative regulation of cytosolic calcium ion concentration	3/196	13/18866	0.000292486	0.00826356	0.00714139	ATP1A2/KCNA5/RYR3	3	GO
GO:0071415	cellular response to purine-containing compound	3/196	13/18866	0.000292486	0.00826356	0.00714139	CASQ2/RYR3/RYR2	3	GO
GO:0048016	inositol phosphate-mediated signaling	5/196	57/18866	0.000310682	0.00861599	0.00744597	INPP5A/MYOZ2/LMCD1/RCAN2/MYOZ1	5	GO
GO:0035637	multicellular organismal signaling	9/196	206/18866	0.000311971	0.00861599	0.00744597	ATP1A2/CASQ2/PLN/NPR1/KCNA5/TRPC1/RYR3/FXYD1/RYR2	9	GO
GO:0010880	regulation of release of sequestered calcium ion into cytosol by sarcoplasmic reticulum	4/196	32/18866	0.000323495	0.00873791	0.00755133	ATP1A2/CASQ2/PLN/RYR2	4	GO
GO:0050849	negative regulation of calcium-mediated signaling	4/196	32/18866	0.000323495	0.00873791	0.00755133	CASQ2/MYOZ2/PKD2/MYOZ1	4	GO
GO:0017015	regulation of transforming growth factor beta receptor signaling pathway	7/196	127/18866	0.000366784	0.00965972	0.00834796	BAMBI/MYOCD/NPNT/ASPN/PMEPA1/PRDM16/LTBP4	7	GO
GO:0003214	cardiac left ventricle morphogenesis	3/196	14/18866	0.000369412	0.00965972	0.00834796	CPE/HEY2/RYR2	3	GO
GO:0030836	positive regulation of actin filament depolymerization	3/196	14/18866	0.000369412	0.00965972	0.00834796	CFL2/ACTN2/DSTN	3	GO
GO:0007156	homophilic cell adhesion via plasma membrane adhesion molecules	8/196	168/18866	0.000379355	0.0098153	0.00848241	CNTN4/NEXN/AMIGO2/PCDHB16/SDK1/PCDH7/FAT3/PCDHB4	8	GO
GO:0034763	negative regulation of transmembrane transport	7/196	128/18866	0.000384645	0.00984852	0.00851112	ATP1A2/CASQ2/PLN/OSR1/PKD2/ACTN2/KCNAB1	7	GO
hsa05414	Dilated cardiomyopathy	8/82	96/8108	5e-06	0.00039017	0.00031099	5350/3679/8515/6443/7169/1674/6262/111	8	KEGG
hsa04022	cGMP-PKG signaling pathway	10/82	167/8108	6.26e-06	0.00039017	0.00031099	477/5350/5332/4881/3778/3779/2770/10398/291/111	10	KEGG
hsa04270	Vascular smooth muscle contraction	9/82	133/8108	6.98e-06	0.00039017	0.00031099	5332/94274/4881/3778/4629/3779/72/10398/111	9	KEGG
hsa04810	Regulation of actin cytoskeleton	11/82	218/8108	1.08e-05	0.00039017	0.00031099	1073/7414/3679/8515/8395/4629/5217/10787/55740/1902/10398	11	KEGG
hsa04024	cAMP signaling pathway	11/82	219/8108	1.13e-05	0.00039017	0.00031099	477/5350/4881/818/2770/10398/5348/6262/2891/627/111	11	KEGG
hsa04261	Adrenergic signaling in cardiomyocytes	9/82	150/8108	1.85e-05	0.00053397	0.00042562	477/5350/5332/818/2770/7169/6262/111/5521	9	KEGG
hsa04911	Insulin secretion	7/82	86/8108	2.36e-05	0.00058284	0.00046457	477/5332/3778/818/3779/6262/111	7	KEGG
hsa04713	Circadian entrainment	7/82	97/8108	5.16e-05	0.00111517	0.00088888	5332/818/6263/2770/6262/2891/111	7	KEGG
hsa05412	Arrhythmogenic right ventricular cardiomyopathy	6/82	77/8108	0.00011899	0.0022873	0.00182316	3679/8515/88/6443/1674/6262	6	KEGG
hsa04921	Oxytocin signaling pathway	8/82	154/8108	0.00015312	0.00264897	0.00211144	5332/4881/818/6263/2770/10398/6262/111	8	KEGG
hsa05410	Hypertrophic cardiomyopathy	6/82	90/8108	0.00028152	0.00442746	0.00352904	3679/8515/6443/7169/1674/6262	6	KEGG
hsa04972	Pancreatic secretion	6/82	102/8108	0.000553	0.00797235	0.00635459	477/5332/3778/7220/6262/111	6	KEGG
hsa04924	Renin secretion	5/82	69/8108	0.00063348	0.00843013	0.00671948	5332/4881/3778/2770/111	5	KEGG
