# Supplementary material for: Bioinformatic Analysis Revealed the Essential Regulatory Genes and Pathways of Early and Advanced Atherosclerotic Plaque in Humans
Source: Cells. 2022 Dec 8;11(24):3976. doi: 10.3390/cells11243976 (PMC9776921; doi:10.3390/cells11243976)
Supplement: Supplementary file 1 [file cells-11-03976-s001.zip › Table S4.xlsx]

## Sheet: Sheet1
Table S4 The results of modular differential connectivity analysis based on dataset of non-plaque and plaque stage
Modules	Size	MDC	0.05	0.95	Sig	Pathway
Module1	3815	0.921011	0.825282	1.20666	N	muscle system process
Module2	1361	0.985474	0.752729	1.33531	N	cell fate commitment
Module3	1270	1.31023	0.81133	1.23454	Y	histone modification
Module4	1231	0.790213	0.794303	1.26304	N	Phospholipid and glycerolipid metabolic process
Module5	1037	1.41456	0.808104	1.24774	Y	Immune-related processes
Module6	792	0.928703	0.766819	1.29623	N	ncRNA metabolic process
Module7	427	1.43705	0.757852	1.34002	Y	macroautophagy
Module8	315	1.06023	0.845277	1.18615	N	electron transport chain
Module9	262	1.11639	0.719948	1.33934	N	NA
Module10	56	1.19767	0.720801	1.40628	N	cell chemotaxis
Module11	50	1.08569	0.831791	1.21144	N	sprouting angiogenesis
Module12	40	0.637902	0.774234	1.32323	Y	B cell activation
Module13	39	1.02347	0.78663	1.30543	N	NA
Module14	34	1.08262	0.784673	1.28263	N	response to virus
