# Supplementary material for: Bioinformatic Analysis Revealed the Essential Regulatory Genes and Pathways of Early and Advanced Atherosclerotic Plaque in Humans
Source: Cells. 2022 Dec 8;11(24):3976. doi: 10.3390/cells11243976 (PMC9776921; doi:10.3390/cells11243976)
Supplement: Supplementary file 1 [file cells-11-03976-s001.zip › Table S5.xlsx]

## Sheet: Table S4
Table S5 The enrichment pathways of module 3, 5, 7 and 12 using GO analysis
ID	Description	GeneRatio	BgRatio	pvalue	p.adjust	qvalue	geneID	Count	Modules
GO:0016570	histone modification	73/1121	468/18866	2.72126e-14	1.0053e-10	8.89726e-11	SKI/PINK1/LMNA/USP21/CRTC2/PYGO2/LDB1/PRDM11/NAA40/KAT5/APBB1/SETD1B/EP400/HDAC7/KMT2D/MCRS1/MAP3K12/BAZ2A/MTA1/PRMT5/SRCAP/RNF40/SETD6/CREBBP/GLYR1/MAPK3/SUPT6H/MLLT6/MSL1/PER1/FLCN/USP22/PCGF2/KAT2A/HDAC5/USP36/KDM4B/PKN1/SIN3B/KMT2B/MBD3/BRD4/AKAP8/PAF1/KANSL3/HDAC4/ZNF335/HLCS/EP300/BRD1/ING5/HDAC11/TADA3/BAP1/PCGF3/CTBP1/JADE2/RING1/PHF1/BRPF3/EHMT2/TRRAP/TAF6/PHF2/EHMT1/PHF19/MSL3/HDAC6/KDM…	73	Module 3
GO:0016569	covalent chromatin modification	74/1121	481/18866	3.73092e-14	1.0053e-10	8.89726e-11	SKI/PINK1/LMNA/USP21/CRTC2/PYGO2/LDB1/PRDM11/NAA40/KAT5/APBB1/SETD1B/EP400/HDAC7/KMT2D/MCRS1/MAP3K12/BAZ2A/MTA1/PRMT5/SRCAP/RNF40/SETD6/CREBBP/GLYR1/MAPK3/SUPT6H/MLLT6/MSL1/PER1/FLCN/USP22/PCGF2/KAT2A/HDAC5/USP36/KDM4B/PKN1/SIN3B/KMT2B/TRIM28/MBD3/BRD4/AKAP8/PAF1/KANSL3/HDAC4/ZNF335/HLCS/EP300/BRD1/ING5/HDAC11/TADA3/BAP1/PCGF3/CTBP1/JADE2/RING1/PHF1/BRPF3/EHMT2/TRRAP/TAF6/PHF2/EHMT1/PHF19/MSL3/HD…	74	Module 3
GO:0018205	peptidyl-lysine modification	63/1121	405/18866	1.89776e-12	3.40901e-09	3.01711e-09	LMNA/CRTC2/PYGO2/LOXL4/LDB1/NAA40/KAT5/TOLLIP/APBB1/RELA/P3H3/SETD1B/EP400/KMT2D/MCRS1/LOXL1/METTL22/SRCAP/SETD6/CREBBP/GLYR1/MAPK3/SUPT6H/MLLT6/MSL1/PER1/FLCN/USP22/PCGF2/P3H4/KAT2A/HMG20B/PIAS4/KMT2B/TRPM4/TRIM28/MBD3/BRD4/KANSL3/METTL21A/HDAC4/ZNF335/EP300/NUP50/BRD1/ING5/GNL3/TADA3/CTBP1/JADE2/PHF1/BRPF3/BAG6/EHMT2/TRRAP/STX1A/TAF6/EHMT1/PHF19/MSL3/HDAC6/HCFC1/MECP2	63	Module 3
GO:0010506	regulation of autophagy	55/1121	347/18866	2.3565e-11	3.17479e-08	2.80981e-08	PINK1/HAX1/QSOX1/MTOR/UBQLN4/TRIM8/PIP4K2A/TRIM22/KAT5/RAB1B/TRIM68/TPCN1/ULK1/PHB2/CAMKK2/AKT1/TSC2/CLEC16A/NPRL3/WDR24/MAPK3/CSNK2A2/RPTOR/FOXK2/FLCN/OSBPL7/EXOC7/USP36/STK11/SUPT5H/SNRNP70/DAPK3/KEAP1/PRKACA/GSK3A/SH3BP4/SOGA1/EP300/SREBF2/WDR6/RUBCN/CASP3/LARP1/DAP/VDAC1/FOXK1/BNIP3L/NRBP2/LRSAM1/ABL1/GPSM1/TBC1D25/HDAC6/UBQLN2/HUWE1	55	Module 3
GO:0018393	internal peptidyl-lysine acetylation	33/1121	164/18866	5.17931e-10	5.58226e-07	4.94052e-07	CRTC2/PYGO2/LDB1/NAA40/KAT5/APBB1/EP400/MCRS1/SRCAP/CREBBP/GLYR1/MAPK3/MSL1/PER1/FLCN/USP22/PCGF2/KAT2A/MBD3/KANSL3/EP300/BRD1/ING5/TADA3/CTBP1/JADE2/BRPF3/BAG6/TRRAP/TAF6/MSL3/HCFC1/MECP2	33	Module 3
GO:0006475	internal protein amino acid acetylation	33/1121	166/18866	7.20134e-10	5.72427e-07	5.0662e-07	CRTC2/PYGO2/LDB1/NAA40/KAT5/APBB1/EP400/MCRS1/SRCAP/CREBBP/GLYR1/MAPK3/MSL1/PER1/FLCN/USP22/PCGF2/KAT2A/MBD3/KANSL3/EP300/BRD1/ING5/TADA3/CTBP1/JADE2/BRPF3/BAG6/TRRAP/TAF6/MSL3/HCFC1/MECP2	33	Module 3
GO:0031331	positive regulation of cellular catabolic process	56/1121	390/18866	7.4355e-10	5.72427e-07	5.0662e-07	PINK1/DVL1/TRIM8/PIP4K2A/PNPLA2/TRIM22/KAT5/TRIM68/PACSIN3/CPT1A/USP5/LRP1/TPCN1/ULK1/PHB2/CAMKK2/IRS2/AKT1/SNX33/STUB1/TSC2/CLEC16A/RNF40/MAPK3/FLCN/OSBPL7/CSNK1D/STK11/FZR1/RAD23A/UPF1/SUPT5H/KHSRP/INSR/KEAP1/AKT2/GSK3A/DNAJB2/SH3BP4/ZFP36L2/RNF185/GTPBP1/PPARA/LARP1/BAG6/BNIP3L/HSF1/AGO2/DAB2IP/LRSAM1/GPSM1/ZER1/ABCA2/HDAC6/UBQLN2/HUWE1	56	Module 3
GO:0016573	histone acetylation	32/1121	159/18866	9.40346e-10	6.33441e-07	5.60619e-07	CRTC2/PYGO2/LDB1/NAA40/KAT5/APBB1/EP400/MCRS1/SRCAP/CREBBP/GLYR1/MAPK3/MSL1/PER1/FLCN/USP22/PCGF2/KAT2A/MBD3/KANSL3/EP300/BRD1/ING5/TADA3/CTBP1/JADE2/BRPF3/TRRAP/TAF6/MSL3/HCFC1/MECP2	32	Module 3
GO:0018394	peptidyl-lysine acetylation	33/1121	172/18866	1.86918e-09	1.11923e-06	9.90558e-07	CRTC2/PYGO2/LDB1/NAA40/KAT5/APBB1/EP400/MCRS1/SRCAP/CREBBP/GLYR1/MAPK3/MSL1/PER1/FLCN/USP22/PCGF2/KAT2A/MBD3/KANSL3/EP300/BRD1/ING5/TADA3/CTBP1/JADE2/BRPF3/BAG6/TRRAP/TAF6/MSL3/HCFC1/MECP2	33	Module 3
GO:1903829	positive regulation of cellular protein localization	49/1121	338/18866	6.27562e-09	3.38193e-06	2.99314e-06	CROCC/PINK1/CDC42/EPB41/RHOU/EPHA2/RAB29/TRIM8/HRAS/NUMA1/CACNB3/LRP1/MCRS1/PPP1R13B/AKT1/MAP1A/SMAD3/SNX33/GLIS2/GAS8/CSNK2A2/ERBB2/ITGA3/MYO1C/STAC2/JUP/USP36/STK11/TRIM28/PRKACA/CLIP3/AKT2/TGFB1/GSK3A/MAVS/CEP250/PCNT/ZDHHC8/SREBF2/GNL3/CAMK1/BAP1/ABLIM3/CD2AP/GLI3/FIS1/SEC16A/HUWE1/FLNA	49	Module 3
GO:0006473	protein acetylation	35/1121	203/18866	1.13764e-08	5.5734e-06	4.93267e-06	CRTC2/PYGO2/LDB1/NAA40/KAT5/APBB1/EP400/MCRS1/SRCAP/CREBBP/GLYR1/MAPK3/MSL1/PER1/FLCN/USP22/PCGF2/KAT2A/NAT9/MBD3/KANSL3/EP300/BRD1/ING5/CAMK1/TADA3/CTBP1/JADE2/BRPF3/BAG6/TRRAP/TAF6/MSL3/HCFC1/MECP2	35	Module 3
GO:0009896	positive regulation of catabolic process	58/1121	454/18866	2.95356e-08	1.32639e-05	1.17391e-05	PINK1/DVL1/TRIM8/PIP4K2A/PNPLA2/TRIM22/KAT5/TRIM68/PACSIN3/STX5/CPT1A/USP5/LRP1/TPCN1/ULK1/PHB2/CAMKK2/IRS2/AKT1/SNX33/STUB1/TSC2/CLEC16A/RNF40/MAPK3/FLCN/OSBPL7/CSNK1D/STK11/FZR1/RAD23A/UPF1/SUPT5H/KHSRP/INSR/KEAP1/AKT2/GSK3A/DNAJB2/SH3BP4/ZFP36L2/RNF185/GTPBP1/SGSM3/PPARA/LARP1/BAG6/BNIP3L/HSF1/AGO2/DAB2IP/LRSAM1/GPSM1/ZER1/ABCA2/HDAC6/UBQLN2/HUWE1	58	Module 3
GO:0043543	protein acylation	38/1121	248/18866	7.25636e-08	3.00804e-05	2.66223e-05	CRTC2/PYGO2/LDB1/NAA40/KAT5/APBB1/EP400/MCRS1/SRCAP/CREBBP/GLYR1/MAPK3/MSL1/PER1/FLCN/USP22/PCGF2/KAT2A/NAT9/MBD3/CLIP3/KANSL3/ZDHHC8/EP300/BRD1/ING5/CAMK1/TADA3/CTBP1/JADE2/BRPF3/BAG6/TRRAP/TAF6/MSL3/PORCN/HCFC1/MECP2	38	Module 3
GO:0043967	histone H4 acetylation	18/1121	70/18866	9.04283e-08	3.48084e-05	3.08068e-05	NAA40/KAT5/APBB1/EP400/MCRS1/MSL1/PER1/USP22/KAT2A/KANSL3/EP300/ING5/TADA3/CTBP1/JADE2/TRRAP/MSL3/HCFC1	18	Module 3
GO:0043393	regulation of protein binding	34/1121	211/18866	1.02061e-07	3.66671e-05	3.24518e-05	CDC42/LDLRAP1/EPB41/PTPRF/CFHR1/DVL1/CTNNBIP1/PCBD1/CARD16/LRP1/HIP1R/NFATC4/AKT1/B2M/BTBD1/STUB1/GAS8/PKD1/MAPK3/ATP2A3/HDAC5/GTF2F1/PRKACA/SYMPK/MAPRE3/DNAJB2/HDAC4/EP300/PPARA/CAMK1/HIPK2/HSF1/ABL1/GPSM1	34	Module 3
GO:0032388	positive regulation of intracellular transport	35/1121	222/18866	1.15696e-07	3.8968e-05	3.44882e-05	PINK1/CDC42/LDLRAP1/RHOU/RAB29/HRAS/EHD1/NUMA1/CACNB3/DYNC1H1/PPP1R13B/SMAD3/CSNK2A2/ERBB2/MYO1C/JUP/USP36/STK11/EHD2/TRIM28/PRKACA/AKT2/TGFB1/GSK3A/MAVS/PCNT/SREBF2/CAMK1/BAP1/ABLIM3/GLI3/FIS1/SEC16A/HUWE1/FLNA	35	Module 3
GO:0007409	axonogenesis	57/1121	482/18866	5.36074e-07	0.000169935	0.000150399	SZT2/DVL1/EPHA2/NGF/NOTCH2/PLXNA2/UNC5B/ZSWIM8/ILK/APBB1/GAB2/NECTIN1/PTPRO/LRP1/ULK1/IRS2/MAP1A/TNFRSF12A/TAOK2/MAPK3/SIAH1/DOK4/NTN1/LLGL1/MAPK7/ERBB2/STK11/BRSK1/PTPRS/NOTCH3/SPAST/SEMA4F/GPC1/SEMA4C/RAPH1/STK25/PLCG1/LAMA5/PLXNB2/SEMA3F/SEMA3B/PLXNA1/LAMB2/TRIO/DBN1/PDLIM7/SRF/EPHB6/GLI3/GRB10/PLXNA4/SPTAN1/ABL1/HDAC6/PLXNB3/GDI1/PLXNA3	57	Module 3
GO:0010508	positive regulation of autophagy	24/1121	131/18866	7.17368e-07	0.000209034	0.000185003	PINK1/TRIM8/PIP4K2A/TRIM22/KAT5/TRIM68/TPCN1/ULK1/PHB2/CAMKK2/TSC2/CLEC16A/MAPK3/FLCN/STK11/SUPT5H/GSK3A/SH3BP4/LARP1/BNIP3L/LRSAM1/GPSM1/HDAC6/HUWE1	24	Module 3
GO:1903146	regulation of autophagy of mitochondrion	13/1121	43/18866	7.36991e-07	0.000209034	0.000185003	PINK1/HAX1/CAMKK2/TSC2/CLEC16A/CSNK2A2/USP36/GSK3A/SREBF2/VDAC1/BNIP3L/HDAC6/HUWE1	13	Module 3
GO:0006476	protein deacetylation	20/1121	97/18866	8.65546e-07	0.000233221	0.00020641	SKI/PINK1/HDAC7/BAZ2A/MTA1/PER1/HDAC5/SIN3B/AKAP8/SPRED2/HDAC4/EP300/HDAC11/TADA3/CTBP1/CCAR2/FNTA/MSL3/HDAC6/FLNA	20	Module 3
GO:0090316	positive regulation of intracellular protein transport	29/1121	182/18866	1.10527e-06	0.000283462	0.000250875	PINK1/CDC42/RHOU/RAB29/HRAS/CACNB3/PPP1R13B/SMAD3/CSNK2A2/ERBB2/MYO1C/JUP/USP36/TRIM28/PRKACA/AKT2/TGFB1/GSK3A/MAVS/PCNT/SREBF2/CAMK1/BAP1/ABLIM3/GLI3/FIS1/SEC16A/HUWE1/FLNA	29	Module 3
GO:1903533	regulation of protein targeting	18/1121	82/18866	1.1572e-06	0.000283462	0.000250875	PINK1/HAX1/RHOU/HRAS/CACNB3/CSNK2A2/ERBB2/MYO1C/USP36/AKT2/GSK3A/SREBF2/BAP1/ABLIM3/FIS1/BNIP3L/GDI1/HUWE1	18	Module 3
GO:0001843	neural tube closure	19/1121	91/18866	1.3227e-06	0.000305271	0.000270177	SKI/ARID1A/DVL1/DEAF1/TSC2/DVL2/KAT2A/PRKACA/TGFB1/TEAD2/SEMA4C/PLXNB2/DVL3/CASP3/BRD2/FZD1/SCRIB/ABL1/MED12	19	Module 3
GO:0051098	regulation of binding	46/1121	367/18866	1.35953e-06	0.000305271	0.000270177	SKI/CDC42/LDLRAP1/EPB41/PTPRF/CFHR1/DVL1/CTNNBIP1/NGF/PYGO2/PCBD1/CTBP2/CARD16/LRP1/HIP1R/NFATC4/AKT1/B2M/SMAD3/BTBD1/STUB1/GAS8/PKD1/MAPK3/ATP2A3/HDAC5/ZBTB7C/MAU2/TRIM28/ZBTB7A/GTF2F1/PRKACA/TGFB1/SYMPK/MAPRE3/DNAJB2/HDAC4/EP300/PPARA/CAMK1/GMNN/HIPK2/HSF1/ABL1/GPSM1/EDF1	46	Module 3
GO:1902287	semaphorin-plexin signaling pathway involved in axon guidance	7/1121	12/18866	1.56133e-06	0.000326224	0.000288721	PLXNA2/PLXNB2/SEMA3F/PLXNA1/PLXNA4/PLXNB3/PLXNA3	7	Module 3
GO:0060606	tube closure	19/1121	92/18866	1.57524e-06	0.000326224	0.000288721	SKI/ARID1A/DVL1/DEAF1/TSC2/DVL2/KAT2A/PRKACA/TGFB1/TEAD2/SEMA4C/PLXNB2/DVL3/CASP3/BRD2/FZD1/SCRIB/ABL1/MED12	19	Module 3
GO:0032386	regulation of intracellular transport	45/1121	358/18866	1.63445e-06	0.000326224	0.000288721	PINK1/CDC42/LDLRAP1/HAX1/RHOU/RAB29/HRAS/ARHGAP1/EHD1/NUMA1/CACNB3/DYNC1H1/PPP1R13B/SMAD3/MAPK3/CSNK2A2/SUPT6H/ERBB2/MYO1C/JUP/USP36/STK11/RAB11B/EHD2/TRIM28/PRKACA/AKT2/TGFB1/GSK3A/MAVS/PCNT/SREBF2/CAMK1/BAP1/ABLIM3/GLI3/FIS1/BNIP3L/SEC16A/ABCA2/GDI1/GRIPAP1/HUWE1/SNX12/FLNA	45	Module 3
GO:0016241	regulation of macroautophagy	28/1121	176/18866	1.7389e-06	0.000334677	0.000296202	PINK1/QSOX1/MTOR/UBQLN4/PIP4K2A/RAB1B/ULK1/AKT1/TSC2/CLEC16A/NPRL3/MAPK3/RPTOR/EXOC7/USP36/SUPT5H/PRKACA/RUBCN/CASP3/LARP1/BNIP3L/NRBP2/LRSAM1/GPSM1/TBC1D25/HDAC6/UBQLN2/HUWE1	28	Module 3
GO:0010770	positive regulation of cell morphogenesis involved in differentiation	26/1121	157/18866	1.87142e-06	0.000337264	0.000298491	CDC42/NGF/PLXNA2/ILK/LRP1/TNFRSF12A/EEF2K/FBXO31/NTN1/STK11/LIMS2/OBSL1/STK25/PLXNB2/SS18L2/PLXNA1/DBN1/SRF/CUL7/CUX1/PLXNA4/ABL1/PLXNB3/GDI1/PLXNA3/FLNA	26	Module 3
GO:0006352	DNA-templated transcription initiation	35/1121	249/18866	1.87751e-06	0.000337264	0.000298491	CTNNBIP1/NOTCH2/NRBF2/PSMC3/MIRLET7I/BAZ2A/BRF1/CBFB/CREBBP/GTF3C1/MAPK3/POLR2A/THRA/NR1D1/UBTF/NR1H2/TRIM28/MED16/GTF2F1/NOTCH3/TEAD2/NCOA6/TAF4/MED15/PPARA/POLR3H/GTF2E1/SRF/RXRB/TAF11/CRCP/TAF6/GTF2E2/MED12/MECP2	35	Module 3
GO:0042176	regulation of protein catabolic process	48/1121	397/18866	2.25855e-06	0.000392624	0.000347487	PINK1/DVL1/UBQLN4/PACSIN3/STX5/RELA/USP5/LRP1/AKT1/MAP1A/SMAD3/PML/SNX33/STUB1/CLEC16A/RNF40/RHBDF1/PKD1/CSNK2A2/NFE2L1/CHMP6/HGS/OSBPL7/TIMP2/CSNK1D/FZR1/RAD23A/SNRNP70/KEAP1/PRKACA/GIPC1/GSK3A/DNAJB2/ODC1/RNF185/SGSM3/BAG6/HIPK2/CCAR2/RGP1/DAB2IP/ZER1/ABCA2/ARAF/UBQLN2/HUWE1/SNX12/FLNA	48	Module 3
GO:1990778	protein localization to cell periphery	43/1121	340/18866	2.35853e-06	0.000397192	0.00035153	KIF1B/LDLRAP1/EPB41/CLSTN1/EPHA2/RAB29/TUB/PACS1/BBS1/HRAS/DCHS1/EHD1/NUMA1/CACNB3/LRP1/RILPL1/PACS2/AKT1/RAB40C/SLC9A3R2/VPS4A/ITGA3/FLOT2/STAC2/JUP/PALM/EHD2/RAB3D/CLIP3/AKT2/TGFB1/PKDCC/LAMA5/ZDHHC8/GORASP1/NHLRC1/AP4M1/ANK1/SCRIB/SEC16A/ABCA2/GRIPAP1/FLNA	43	Module 3
GO:0033157	regulation of intracellular protein transport	36/1121	264/18866	2.75914e-06	0.000450576	0.000398777	PINK1/CDC42/HAX1/RHOU/RAB29/HRAS/NUMA1/CACNB3/PPP1R13B/SMAD3/CSNK2A2/SUPT6H/ERBB2/MYO1C/JUP/USP36/TRIM28/PRKACA/AKT2/TGFB1/GSK3A/MAVS/PCNT/SREBF2/CAMK1/BAP1/ABLIM3/GLI3/FIS1/BNIP3L/SEC16A/GDI1/GRIPAP1/HUWE1/SNX12/FLNA	36	Module 3
GO:1902285	semaphorin-plexin signaling pathway involved in neuron projection guidance	7/1121	13/18866	3.20876e-06	0.000508588	0.00045012	PLXNA2/PLXNB2/SEMA3F/PLXNA1/PLXNA4/PLXNB3/PLXNA3	7	Module 3
GO:0022604	regulation of cell morphogenesis	56/1121	499/18866	3.48186e-06	0.000536107	0.000474475	FBLIM1/CDC42/EPB41/RHOU/DVL1/NGF/PLXNA2/ZSWIM8/ILK/BCL9L/PTPRO/LRP1/NFATC4/SYNE3/TNFRSF12A/EEF2K/TAOK2/FBXO31/NTN1/SARM1/DVL2/CDC42EP4/PALM/STK11/BRSK1/DAPK3/PTPRS/SEMA4F/SEMA4C/LIMS2/OBSL1/STK25/CDC42EP1/PLXNB2/SS18L2/SEMA3F/SEMA3B/PLXNA1/DVL3/GORASP1/WDR1/MYO10/DIAPH1/DBN1/SRF/CUL7/CUX1/PLXNA4/ABL1/NSMF/PLXNB3/GDI1/PLXNA3/FGD1/ZMYM3/FLNA	56	Module 3
GO:0014020	primary neural tube formation	19/1121	98/18866	4.24854e-06	0.000628118	0.000555909	SKI/ARID1A/DVL1/DEAF1/TSC2/DVL2/KAT2A/PRKACA/TGFB1/TEAD2/SEMA4C/PLXNB2/DVL3/CASP3/BRD2/FZD1/SCRIB/ABL1/MED12	19	Module 3
GO:0035601	protein deacylation	20/1121	107/18866	4.31256e-06	0.000628118	0.000555909	SKI/PINK1/HDAC7/BAZ2A/MTA1/PER1/HDAC5/SIN3B/AKAP8/SPRED2/HDAC4/EP300/HDAC11/TADA3/CTBP1/CCAR2/FNTA/MSL3/HDAC6/FLNA	20	Module 3
GO:0017015	regulation of transforming growth factor beta receptor signaling pathway	22/1121	127/18866	5.36862e-06	0.000761355	0.000673829	SKI/HTRA1/FAM89B/BCL9L/SMAD3/STUB1/VASN/TGFB1I1/CREBBP/ITGA3/FLCN/STK11/LTBP4/ZBTB7A/GIPC1/TGFB1/EMILIN1/SPRED2/SLC2A10/EP300/HIPK2/ENG	22	Module 3
GO:0007411	axon guidance	37/1121	284/18866	5.93188e-06	0.000819664	0.000725435	DVL1/EPHA2/NOTCH2/PLXNA2/UNC5B/ZSWIM8/GAB2/NECTIN1/PTPRO/LRP1/IRS2/MAPK3/SIAH1/DOK4/NTN1/MAPK7/ERBB2/NOTCH3/SEMA4F/GPC1/SEMA4C/PLCG1/LAMA5/PLXNB2/SEMA3F/SEMA3B/PLXNA1/LAMB2/TRIO/PDLIM7/EPHB6/GLI3/GRB10/PLXNA4/SPTAN1/PLXNB3/PLXNA3	37	Module 3
GO:0097485	neuron projection guidance	37/1121	285/18866	6.43601e-06	0.000867091	0.000767409	DVL1/EPHA2/NOTCH2/PLXNA2/UNC5B/ZSWIM8/GAB2/NECTIN1/PTPRO/LRP1/IRS2/MAPK3/SIAH1/DOK4/NTN1/MAPK7/ERBB2/NOTCH3/SEMA4F/GPC1/SEMA4C/PLCG1/LAMA5/PLXNB2/SEMA3F/SEMA3B/PLXNA1/LAMB2/TRIO/PDLIM7/EPHB6/GLI3/GRB10/PLXNA4/SPTAN1/PLXNB3/PLXNA3	37	Module 3
GO:1903844	regulation of cellular response to transforming growth factor beta stimulus	22/1121	129/18866	6.97648e-06	0.000916982	0.000811565	SKI/HTRA1/FAM89B/BCL9L/SMAD3/STUB1/VASN/TGFB1I1/CREBBP/ITGA3/FLCN/STK11/LTBP4/ZBTB7A/GIPC1/TGFB1/EMILIN1/SPRED2/SLC2A10/EP300/HIPK2/ENG	22	Module 3
GO:0098732	macromolecule deacylation	20/1121	111/18866	7.70524e-06	0.000976201	0.000863976	SKI/PINK1/HDAC7/BAZ2A/MTA1/PER1/HDAC5/SIN3B/AKAP8/SPRED2/HDAC4/EP300/HDAC11/TADA3/CTBP1/CCAR2/FNTA/MSL3/HDAC6/FLNA	20	Module 3
GO:0090287	regulation of cellular response to growth factor stimulus	39/1121	310/18866	7.78932e-06	0.000976201	0.000863976	SKI/NOTCH2/HTRA1/ILK/FAM89B/NUMA1/BCL9L/MIR15A/SMAD3/STUB1/VASN/TGFB1I1/CREBBP/ITGB3/ITGA3/HGS/MYO1C/FLCN/UBE2O/FSTL3/STK11/LTBP4/ZBTB7A/GIPC1/FKBP8/TGFB1/CADM4/EMILIN1/GPC1/SPRED2/SLC2A10/EP300/FZD1/GRB10/HIPK2/ADGRA2/DAB2IP/ABL1/ENG	39	Module 3
GO:0043087	regulation of GTPase activity	53/1121	481/18866	1.0699e-05	0.00126346	0.00111821	ARHGEF10L/RGS2/ACAP3/MTOR/EPHA2/ASAP3/BCAR3/PLXNA2/HRAS/ARHGAP1/RASGRP2/TSC2/NPRL3/ARHGAP17/SGSM2/LLGL1/CCL4/ERBB2/LLGL2/ABR/DVL2/FLCN/FOXJ1/TBC1D16/EVI5L/SYDE1/TBC1D17/RGL3/AKT2/SH3BP4/RRP1B/BCR/SGSM3/TBC1D10A/PLXNB2/SBF1/PLXNA1/DVL3/IQSEC1/TNK2/SNX18/PLXNA4/SCRIB/RGP1/RGS3/DAB2IP/TBC1D13/GPSM1/TBC1D25/PLXNB3/GDI1/PLXNA3/FGD1	53	Module 3
GO:0061136	regulation of proteasomal protein catabolic process	28/1121	193/18866	1.07302e-05	0.00126346	0.00111821	PINK1/DVL1/UBQLN4/USP5/AKT1/MAP1A/STUB1/CLEC16A/RNF40/RHBDF1/PKD1/NFE2L1/OSBPL7/CSNK1D/FZR1/RAD23A/KEAP1/PRKACA/GIPC1/GSK3A/DNAJB2/RNF185/BAG6/CCAR2/DAB2IP/ZER1/ARAF/UBQLN2	28	Module 3
GO:1903050	regulation of proteolysis involved in cellular protein catabolic process	31/1121	225/18866	1.07848e-05	0.00126346	0.00111821	PINK1/DVL1/UBQLN4/USP5/AKT1/MAP1A/PML/STUB1/CLEC16A/RNF40/RHBDF1/PKD1/CSNK2A2/NFE2L1/OSBPL7/CSNK1D/FZR1/RAD23A/KEAP1/PRKACA/GIPC1/GSK3A/DNAJB2/RNF185/BAG6/HIPK2/CCAR2/DAB2IP/ZER1/ARAF/UBQLN2	31	Module 3
GO:0021915	neural tube development	25/1121	163/18866	1.18523e-05	0.00135069	0.00119541	SKI/ARID1A/DVL1/EPHA2/PLXNA2/DEAF1/DCHS1/TSC2/PKD1/DVL2/KAT2A/PRKACA/FKBP8/TGFB1/TEAD2/SEMA4C/PLXNB2/DVL3/CASP3/BRD2/FZD1/GLI3/SCRIB/ABL1/MED12	25	Module 3
GO:0010498	proteasomal protein catabolic process	53/1121	483/18866	1.20306e-05	0.00135069	0.00119541	SPSB1/PINK1/DVL1/UBQLN4/KAT5/TRIM3/PSMC3/SYVN1/USP5/DCAF11/MTA1/AKT1/MAP1A/PML/HERC2/STUB1/CLEC16A/RNF40/RHBDF1/PKD1/SIAH1/FBXO31/TNFAIP1/NFE2L1/NR1D1/OSBPL7/CSNK1D/CDC34/FZR1/RAD23A/RCN3/FBXL12/KEAP1/PRKACA/GIPC1/GSK3A/DNAJB2/RBCK1/RNF185/WFS1/TMEM129/PTTG1/PSMB9/CD2AP/NHLRC1/BAG6/GET4/CCAR2/DAB2IP/ZER1/ARAF/UBQLN2/HUWE1	53	Module 3
GO:1903362	regulation of cellular protein catabolic process	34/1121	260/18866	1.28984e-05	0.00141856	0.00125548	PINK1/DVL1/UBQLN4/USP5/LRP1/AKT1/MAP1A/PML/STUB1/CLEC16A/RNF40/RHBDF1/PKD1/CSNK2A2/NFE2L1/OSBPL7/CSNK1D/FZR1/RAD23A/KEAP1/PRKACA/GIPC1/GSK3A/DNAJB2/RNF185/BAG6/HIPK2/CCAR2/RGP1/DAB2IP/ZER1/ABCA2/ARAF/UBQLN2	34	Module 3
GO:0000422	autophagy of mitochondrion	16/1121	79/18866	1.34529e-05	0.00142152	0.0012581	PINK1/HAX1/ATG2A/PHB2/CAMKK2/TSC2/CLEC16A/CSNK2A2/USP36/GSK3A/SREBF2/VDAC1/FIS1/BNIP3L/HDAC6/HUWE1	16	Module 3
GO:0061726	mitochondrion disassembly	16/1121	79/18866	1.34529e-05	0.00142152	0.0012581	PINK1/HAX1/ATG2A/PHB2/CAMKK2/TSC2/CLEC16A/CSNK2A2/USP36/GSK3A/SREBF2/VDAC1/FIS1/BNIP3L/HDAC6/HUWE1	16	Module 3
GO:0001841	neural tube formation	19/1121	106/18866	1.39545e-05	0.00144617	0.00127991	SKI/ARID1A/DVL1/DEAF1/TSC2/DVL2/KAT2A/PRKACA/TGFB1/TEAD2/SEMA4C/PLXNB2/DVL3/CASP3/BRD2/FZD1/SCRIB/ABL1/MED12	19	Module 3
GO:0071526	semaphorin-plexin signaling pathway	11/1121	40/18866	1.45263e-05	0.00147703	0.00130723	PLXNA2/SEMA4F/SEMA4C/PLXNB2/SEMA3F/SEMA3B/PLXNA1/PLXNA4/PLXNB3/PLXNA3/FLNA	11	Module 3
GO:0031647	regulation of protein stability	37/1121	296/18866	1.52681e-05	0.0015237	0.00134853	PINK1/LMNA/DVL1/TRIM44/SYVN1/HIP1R/PHB2/SMAD3/STUB1/CREBBP/COG7/SIAH1/FLOT2/NR1D1/KAT2A/USP36/RAD23A/GIPC1/WIZ/LSS/NF2/EP300/DVL3/TADA3/WFS1/HSP90AB2P/CASP3/BAG6/PEX6/GET4/CCAR2/GSN/SEC16A/HDAC6/USP27X/HCFC1/FLNA	37	Module 3
GO:0060562	epithelial tube morphogenesis	40/1121	331/18866	1.56763e-05	0.001536	0.00135942	SKI/ARID1A/DVL1/CTNNBIP1/EPHA2/NOTCH2/LZTS2/DLG5/ILK/LRP5/DEAF1/DCHS1/PHB2/COL4A1/NFATC4/SMAD3/PML/TSC2/PKD1/NTN1/TBX2/DVL2/KAT2A/PRKACA/TGFB1/TEAD2/SEMA4C/LAMA5/PLXNB2/DVL3/CASP3/DDR1/BRD2/SRF/FZD1/GLI3/SCRIB/ABL1/ENG/MED12	40	Module 3
GO:0016049	cell growth	53/1121	490/18866	1.79952e-05	0.0016999	0.00150448	CDC42/RGS2/DVL1/CDK11A/CLSTN1/MTOR/NGF/ILK/PRDM11/APBB1/RASGRP2/LRP1/ULK1/KMT2D/YY1/AKT1/SMAD3/PML/TNFRSF12A/TAOK2/BCAR1/NTN1/ERBB2/RPTOR/FLCN/STK11/LTBP4/PPP2R1A/PTPRS/TGFB1/GSK3A/SEMA4F/DNAJB2/SH3BP4/SEMA4C/RAPH1/PPARA/SEMA3F/SEMA3B/PLXNA1/LAMB2/BAP1/DBN1/DDR1/SRF/PLXNA4/CCAR2/EXTL3/ABL1/HDAC6/GDI1/PLXNA3/CDK11B	53	Module 3
GO:0010769	regulation of cell morphogenesis involved in differentiation	38/1121	310/18866	1.83943e-05	0.0016999	0.00150448	CDC42/NGF/PLXNA2/ZSWIM8/ILK/PTPRO/LRP1/NFATC4/TNFRSF12A/EEF2K/FBXO31/NTN1/SARM1/STK11/BRSK1/PTPRS/SEMA4F/SEMA4C/LIMS2/OBSL1/STK25/PLXNB2/SS18L2/SEMA3F/SEMA3B/PLXNA1/GORASP1/DBN1/SRF/CUL7/CUX1/PLXNA4/ABL1/NSMF/PLXNB3/GDI1/PLXNA3/FLNA	38	Module 3
GO:0016236	macroautophagy	38/1121	310/18866	1.83943e-05	0.0016999	0.00150448	PINK1/QSOX1/MTOR/UBQLN4/PIK3C2B/PIP4K2A/RAB1B/ATG2A/ULK1/PHB2/VPS37B/PACS2/AKT1/TSC2/CLEC16A/VPS4A/NPRL3/MAPK3/CSNK2A2/RPTOR/CHMP6/HGS/EXOC7/USP36/SUPT5H/PRKACA/RUBCN/CASP3/LARP1/VDAC1/BNIP3L/NRBP2/LRSAM1/GPSM1/TBC1D25/HDAC6/UBQLN2/HUWE1	38	Module 3
GO:0016242	negative regulation of macroautophagy	10/1121	34/18866	1.86109e-05	0.0016999	0.00150448	PINK1/QSOX1/MTOR/UBQLN4/AKT1/TSC2/CLEC16A/USP36/RUBCN/NRBP2	10	Module 3
GO:0090092	regulation of transmembrane receptor protein serine/threonine kinase signaling pathway	33/1121	254/18866	1.96927e-05	0.00176783	0.0015646	SKI/NOTCH2/HTRA1/ILK/FAM89B/NUMA1/BCL9L/SMAD3/STUB1/VASN/SH2B1/TGFB1I1/CREBBP/ITGA3/FLCN/UBE2O/FSTL3/STK11/LTBP4/ZBTB7A/GIPC1/FKBP8/TGFB1/EMILIN1/SPRED2/SLC2A10/EP300/ACVR2B/FZD1/HIPK2/ZC3H3/ABL1/ENG	33	Module 3
GO:0031346	positive regulation of cell projection organization	45/1121	394/18866	2.01426e-05	0.00176783	0.0015646	CROCC/CDC42/RGS2/DVL1/MTOR/WASF2/NGF/PLXNA2/DLG5/ILK/HRAS/MOB2/APBB1/LRP1/TNFRSF12A/EEF2K/FBXO31/NTN1/ITGA3/DVL2/KAT2A/CDC42EP4/PALM/STK11/OBSL1/HDAC4/STK25/CDC42EP1/EP300/PLXNB2/SS18L2/PLXNA1/NCK1/DVL3/CAMK1/DBN1/SRF/CUL7/FZD1/CUX1/PLXNA4/DAB2IP/PLXNB3/GDI1/PLXNA3	45	Module 3
GO:0006367	transcription initiation from RNA polymerase II promoter	27/1121	189/18866	2.03388e-05	0.00176783	0.0015646	CTNNBIP1/NOTCH2/NRBF2/PSMC3/MIRLET7I/CBFB/CREBBP/POLR2A/THRA/NR1D1/NR1H2/TRIM28/MED16/GTF2F1/NOTCH3/TEAD2/TAF4/MED15/PPARA/GTF2E1/SRF/RXRB/TAF11/TAF6/GTF2E2/MED12/MECP2	27	Module 3
GO:0010976	positive regulation of neuron projection development	36/1121	290/18866	2.3031e-05	0.00197006	0.00174358	RGS2/DVL1/MTOR/NGF/PLXNA2/DLG5/ILK/MOB2/APBB1/LRP1/TNFRSF12A/EEF2K/FBXO31/NTN1/ITGA3/DVL2/STK11/OBSL1/STK25/EP300/PLXNB2/SS18L2/PLXNA1/NCK1/DVL3/CAMK1/DBN1/SRF/CUL7/FZD1/CUX1/PLXNA4/DAB2IP/PLXNB3/GDI1/PLXNA3	36	Module 3
GO:1902903	regulation of supramolecular fiber organization	43/1121	373/18866	2.4434e-05	0.00205742	0.00182089	ARHGEF10L/CDC42/HAX1/MTOR/ASAP3/WASF2/ARHGEF2/SSH3/NUMA1/ESAM/FKBP4/HIP1R/MAP1A/SMAD3/CORO2B/MYO1C/CDC42EP4/SPIRE1/PLEKHG2/DAPK3/CLIP3/MAPRE3/EMILIN1/SPAST/DCTN1/NF2/CDC42EP1/PICK1/VILL/NCK1/WDR1/DBN1/AEBP1/ACTR3C/SORBS3/TESK1/GSN/SPTAN1/ABL1/GBA2/HDAC6/MECP2/FLNA	43	Module 3
GO:0007179	transforming growth factor beta receptor signaling pathway	28/1121	202/18866	2.53152e-05	0.00209883	0.00185754	SKI/HTRA1/FAM89B/LTBP3/BCL9L/LTBP2/SMAD3/PML/STUB1/VASN/TGFB1I1/CREBBP/ITGA3/FLCN/STK11/LTBP4/ZBTB7A/GIPC1/TGFB1/EMILIN1/SPRED2/SLC2A10/EP300/ITGB5/ZYX/HIPK2/FNTA/ENG	28	Module 3
GO:0071559	response to transforming growth factor beta	33/1121	258/18866	2.7163e-05	0.0022179	0.00196293	SKI/HTRA1/FAM89B/LTBP3/BCL9L/COL4A2/LTBP2/SMAD3/PML/STUB1/VASN/TGFB1I1/CREBBP/ZFHX3/MAPK7/ITGA3/FLCN/STK11/LTBP4/ZBTB7A/GIPC1/TGFB1/EMILIN1/FNDC4/ZFP36L2/SPRED2/SLC2A10/EP300/ITGB5/ZYX/HIPK2/FNTA/ENG	33	Module 3
GO:0034976	response to endoplasmic reticulum stress	36/1121	294/18866	3.09561e-05	0.00248989	0.00220365	LMNA/ZBTB17/TXNDC12/NRBF2/SYVN1/ERP27/CTDSP2/TMX1/PML/STUB1/NFE2L1/ATP2A3/PPP1R15A/RCN3/NR1H2/EEF2/GSK3A/DNAJB2/DCTN1/RNF185/KDELR3/EP300/NCK1/WFS1/TMEM129/KLHDC3/NHLRC1/BAG6/CUL7/GET4/EXTL3/CREB3/DAB2IP/TLN1/SEC16A/UBQLN2	36	Module 3
GO:1902275	regulation of chromatin organization	27/1121	195/18866	3.57698e-05	0.00283476	0.00250887	SKI/PINK1/LMNA/PYGO2/NAA40/SSRP1/RNF40/GLYR1/MAPK3/SUPT6H/MLLT6/FLCN/KAT2A/KMT2B/TRIM28/BRD4/AKAP8/PAF1/ZNF335/HIRA/TADA3/CTBP1/PHF1/PHF2/PHF19/PHF8/MECP2	27	Module 3
GO:0050772	positive regulation of axonogenesis	16/1121	86/18866	4.07494e-05	0.00317832	0.00281294	NGF/PLXNA2/ILK/LRP1/TNFRSF12A/NTN1/STK11/STK25/PLXNB2/PLXNA1/DBN1/SRF/PLXNA4/PLXNB3/GDI1/PLXNA3	16	Module 3
GO:0051090	regulation of DNA-binding transcription factor activity	49/1121	455/18866	4.12846e-05	0.00317832	0.00281294	PINK1/CTNNBIP1/CRTC2/ARHGEF2/PPRC1/TRIM8/TRIM22/LRP5/TRIM68/RELA/CARD16/PHB2/MIR15A/AKT1/SMAD3/CRTC3/GLIS2/SETD6/PKD1/MAPK3/DVL2/FLOT2/JUP/HDAC5/FOXJ1/PIAS4/CACTIN/ZBTB7A/KEAP1/RNF25/HDAC4/RBCK1/MAVS/FOXS1/RIPK4/EP300/WFS1/TRIM41/DAP/NFKBIL1/SRF/TRIM26/FZD1/HIPK2/LRRC14/TRAPPC9/DAB2IP/TRAF1/FLNA	49	Module 3
GO:0001558	regulation of cell growth	46/1121	420/18866	4.6687e-05	0.00354361	0.00313623	CDC42/RGS2/CDK11A/CLSTN1/MTOR/NGF/ILK/PRDM11/APBB1/RASGRP2/LRP1/YY1/AKT1/SMAD3/PML/TNFRSF12A/TAOK2/BCAR1/NTN1/ERBB2/RPTOR/FLCN/STK11/LTBP4/PPP2R1A/PTPRS/TGFB1/GSK3A/SEMA4F/DNAJB2/SH3BP4/SEMA4C/PPARA/SEMA3F/SEMA3B/BAP1/DBN1/DDR1/SRF/PLXNA4/CCAR2/EXTL3/ABL1/GDI1/PLXNA3/CDK11B	46	Module 3
GO:0019318	hexose metabolic process	32/1121	254/18866	4.81845e-05	0.0035806	0.00316897	H6PD/WDTC1/MTOR/CRTC2/CREM/LRP5/INPPL1/CPT1A/IRS2/AKT1/MAN2A2/MAN2C1/MLYCD/NFE2L1/C1QTNF1/FOXK2/KAT2A/INSR/AKT2/GSK3A/KHK/POFUT1/SOGA1/POFUT2/EP300/PPARA/SLC25A1/PMM1/NISCH/MAN2B2/FOXK1/PGAM2	32	Module 3
GO:1903214	regulation of protein targeting to mitochondrion	11/1121	45/18866	4.85033e-05	0.0035806	0.00316897	PINK1/HAX1/RHOU/CSNK2A2/USP36/GSK3A/SREBF2/BAP1/ABLIM3/BNIP3L/HUWE1	11	Module 3
GO:0034329	cell junction assembly	47/1121	434/18866	5.13024e-05	0.00373606	0.00330656	FBLIM1/CDC42/DVL1/CLSTN1/EPHA2/COL16A1/RAB29/DLG5/LDB1/ILK/DCHS1/NRXN2/NECTIN1/ESAM/PTPRO/LRP1/HDAC7/ACTN1/SMAD3/CORO2B/EEF2K/TAOK2/CBFB/NLGN2/NTN1/MYO1C/FLCN/JUP/SDK2/LRFN3/PIP5K1C/DAPK3/PTPRS/PRKACA/LIMS2/OBSL1/BCR/ARVCF/PLXNB2/WDR1/SRF/FZD1/PLEC/ABL1/TLN1/MECP2/FLNA	47	Module 3
GO:0050769	positive regulation of neurogenesis	51/1121	485/18866	5.41235e-05	0.00388895	0.00344187	SPEN/RGS2/DVL1/MTOR/NGF/ARHGEF2/PLXNA2/DLG5/ILK/MOB2/APBB1/RELA/GDPD5/LRP1/PRMT5/ZNF609/TNFRSF12A/EEF2K/FBXO31/KCTD11/NTN1/ITGA3/DVL2/TIMP2/CSNK1D/STK11/HMG20B/TGFB1/OBSL1/STK25/ZNF335/EP300/PLXNB2/SS18L2/PLXNA1/NCK1/DVL3/CAMK1/DBN1/SRF/CUL7/FZD1/CUX1/GLI3/PLXNA4/DAB2IP/NSMF/PLXNB3/GDI1/PLXNA3/FLNA	51	Module 3
GO:0016575	histone deacetylation	15/1121	79/18866	5.50183e-05	0.00390123	0.00345274	SKI/PINK1/HDAC7/BAZ2A/MTA1/PER1/HDAC5/SIN3B/AKAP8/HDAC4/HDAC11/TADA3/CTBP1/MSL3/HDAC6	15	Module 3
GO:0072659	protein localization to plasma membrane	34/1121	281/18866	6.47054e-05	0.00452854	0.00400793	LDLRAP1/EPHA2/PACS1/BBS1/DCHS1/EHD1/CACNB3/LRP1/RILPL1/PACS2/AKT1/RAB40C/SLC9A3R2/VPS4A/ITGA3/FLOT2/STAC2/JUP/PALM/EHD2/RAB3D/CLIP3/AKT2/TGFB1/PKDCC/LAMA5/ZDHHC8/GORASP1/NHLRC1/ANK1/SCRIB/SEC16A/GRIPAP1/FLNA	34	Module 3
GO:1903955	positive regulation of protein targeting to mitochondrion	9/1121	32/18866	7.22403e-05	0.00499106	0.00441728	PINK1/RHOU/CSNK2A2/USP36/GSK3A/SREBF2/BAP1/ABLIM3/HUWE1	9	Module 3
GO:0048588	developmental cell growth	30/1121	237/18866	7.5112e-05	0.00512378	0.00453474	RGS2/DVL1/MTOR/NGF/ILK/LRP1/ULK1/KMT2D/YY1/TNFRSF12A/NTN1/STK11/PTPRS/GSK3A/SEMA4F/SEMA4C/RAPH1/PPARA/SEMA3F/SEMA3B/PLXNA1/LAMB2/DBN1/DDR1/SRF/PLXNA4/ABL1/HDAC6/GDI1/PLXNA3	30	Module 3
GO:0045666	positive regulation of neuron differentiation	42/1121	380/18866	8.00434e-05	0.00539192	0.00477206	RGS2/DVL1/MTOR/NGF/ARHGEF2/PLXNA2/DLG5/ILK/MOB2/APBB1/GDPD5/LRP1/TNFRSF12A/EEF2K/FBXO31/KCTD11/NTN1/ITGA3/DVL2/TIMP2/CSNK1D/STK11/HMG20B/OBSL1/STK25/EP300/PLXNB2/SS18L2/PLXNA1/NCK1/DVL3/CAMK1/DBN1/SRF/CUL7/FZD1/CUX1/PLXNA4/DAB2IP/PLXNB3/GDI1/PLXNA3	42	Module 3
GO:0090100	positive regulation of transmembrane receptor protein serine/threonine kinase signaling pathway	18/1121	110/18866	8.14625e-05	0.00541977	0.00479671	NOTCH2/ILK/NUMA1/SH2B1/TGFB1I1/CREBBP/FLCN/UBE2O/STK11/GIPC1/FKBP8/TGFB1/SLC2A10/EP300/ACVR2B/HIPK2/ZC3H3/ENG	18	Module 3
GO:1902894	negative regulation of pri-miRNA transcription by RNA polymerase II	6/1121	14/18866	8.6231e-05	0.00566706	0.00501557	RELA/NFATC4/YY1/HDAC4/PPARA/SRF	6	Module 3
GO:1903008	organelle disassembly	18/1121	111/18866	9.19206e-05	0.00596819	0.00528208	PINK1/HAX1/STX5/ATG2A/PHB2/CAMKK2/TSC2/CLEC16A/CSNK2A2/USP36/GSK3A/SPAST/SREBF2/VDAC1/FIS1/BNIP3L/HDAC6/HUWE1	18	Module 3
GO:0071560	cellular response to transforming growth factor beta stimulus	31/1121	252/18866	9.83795e-05	0.00624399	0.00552617	SKI/HTRA1/FAM89B/LTBP3/BCL9L/COL4A2/LTBP2/SMAD3/PML/STUB1/VASN/TGFB1I1/CREBBP/MAPK7/ITGA3/FLCN/STK11/LTBP4/ZBTB7A/GIPC1/TGFB1/EMILIN1/ZFP36L2/SPRED2/SLC2A10/EP300/ITGB5/ZYX/HIPK2/FNTA/ENG	31	Module 3
GO:0007178	transmembrane receptor protein serine/threonine kinase signaling pathway	40/1121	359/18866	9.84856e-05	0.00624399	0.00552617	SKI/NOTCH2/HTRA1/ILK/FAM89B/LTBP3/NUMA1/BCL9L/LTBP2/SMAD3/PML/STUB1/VASN/SH2B1/TGFB1I1/CREBBP/MAPK3/ITGA3/FLCN/UBE2O/FSTL3/STK11/LTBP4/ZBTB7A/GIPC1/FKBP8/TGFB1/EMILIN1/SPRED2/SLC2A10/EP300/ACVR2B/ITGB5/FZD1/ZYX/HIPK2/FNTA/ZC3H3/ABL1/ENG	40	Module 3
GO:0031998	regulation of fatty acid beta-oxidation	7/1121	20/18866	0.00010027	0.0062832	0.00556087	MTOR/CPT1A/IRS2/AKT1/MLYCD/AKT2/PPARA	7	Module 3
GO:0048017	inositol lipid-mediated signaling	26/1121	196/18866	0.000102391	0.00634238	0.00561325	HAX1/PEAR1/NGF/PI4KB/PIK3C2B/UNC5B/PIP4K2A/PLCB3/GAB2/PITPNM2/IRS2/AKT1/TNFAIP8L3/TSC2/MAPK3/ERBB2/PLCD3/PIP5K1C/INSR/PI4KA/PLCD1/RGL2/GSN/DAB2IP/NCS1/INPP5E	26	Module 3
GO:0050770	regulation of axonogenesis	25/1121	186/18866	0.000111658	0.00683777	0.00605169	NGF/PLXNA2/ZSWIM8/ILK/PTPRO/LRP1/TNFRSF12A/NTN1/STK11/BRSK1/PTPRS/SEMA4F/SEMA4C/STK25/PLXNB2/SEMA3F/SEMA3B/PLXNA1/DBN1/SRF/PLXNA4/ABL1/PLXNB3/GDI1/PLXNA3	25	Module 3
GO:0032922	circadian regulation of gene expression	13/1121	66/18866	0.000115166	0.00695263	0.00615335	CRY2/MTA1/PRMT5/PML/ZFHX3/RAI1/MYBBP1A/PER1/NR1D1/CSNK1D/NPAS2/PPARA/HUWE1	13	Module 3
GO:0048675	axon extension	19/1121	123/18866	0.000116114	0.00695263	0.00615335	DVL1/ILK/LRP1/ULK1/TNFRSF12A/NTN1/PTPRS/SEMA4F/SEMA4C/RAPH1/SEMA3F/SEMA3B/LAMB2/DBN1/SRF/PLXNA4/ABL1/GDI1/PLXNA3	19	Module 3
GO:0030111	regulation of Wnt signaling pathway	41/1121	375/18866	0.000122917	0.0072791	0.00644229	SKI/PTPRU/RNF220/DVL1/CTNNBIP1/TRABD2B/LZTS2/ILK/PSMC3/PTPRO/LRP1/LATS2/NFATC4/SMAD3/TSC2/CBFB/ITGA3/NXN/DVL2/NLE1/JUP/CSNK1D/NFATC1/STK11/TRPM4/PPP2R1A/TLE2/DAPK3/TGFB1/GSK3A/PLEKHA4/IGFBP2/DVL3/PSMB9/FZD1/GLI3/GRB10/CCAR2/ADGRA2/DAB2IP/ABL1	41	Module 3
GO:0010507	negative regulation of autophagy	15/1121	85/18866	0.000131411	0.00769756	0.00681263	PINK1/QSOX1/MTOR/UBQLN4/AKT1/TSC2/CLEC16A/FOXK2/USP36/SNRNP70/WDR6/RUBCN/DAP/FOXK1/NRBP2	15	Module 3
GO:0036498	IRE1-mediated unfolded protein response	13/1121	67/18866	0.00013522	0.00783551	0.00693473	LMNA/ZBTB17/SYVN1/CTDSP2/GSK3A/DCTN1/KDELR3/WFS1/KLHDC3/CUL7/EXTL3/DAB2IP/TLN1	13	Module 3
GO:0031032	actomyosin structure organization	26/1121	200/18866	0.000143014	0.00819716	0.0072548	ARHGEF10L/CDC42/EPB41/LURAP1/MTOR/ASAP3/WASF2/TNNT3/KRT8/CDC42BPB/SMAD3/CORO2B/VPS4A/TNFAIP1/MYH3/CNN2/OBSL1/EPB41L1/NF2/ITGB5/WDR1/SRF/ZYX/SORBS3/TESK1/ABL1	26	Module 3
GO:0001838	embryonic epithelial tube formation	19/1121	125/18866	0.000144504	0.00819716	0.0072548	SKI/ARID1A/DVL1/DEAF1/TSC2/DVL2/KAT2A/PRKACA/TGFB1/TEAD2/SEMA4C/PLXNB2/DVL3/CASP3/BRD2/FZD1/SCRIB/ABL1/MED12	19	Module 3
GO:0051091	positive regulation of DNA-binding transcription factor activity	32/1121	270/18866	0.000154566	0.0086766	0.00767913	PINK1/CRTC2/ARHGEF2/PPRC1/TRIM8/TRIM22/LRP5/TRIM68/RELA/CARD16/PHB2/AKT1/SMAD3/CRTC3/DVL2/FLOT2/JUP/HDAC5/ZBTB7A/RNF25/HDAC4/RBCK1/MAVS/RIPK4/EP300/TRIM41/SRF/TRIM26/FZD1/HIPK2/TRAPPC9/TRAF1	32	Module 3
GO:0016239	positive regulation of macroautophagy	13/1121	68/18866	0.000158211	0.00874304	0.00773793	PINK1/PIP4K2A/ULK1/TSC2/CLEC16A/MAPK3/SUPT5H/LARP1/BNIP3L/LRSAM1/GPSM1/HDAC6/HUWE1	13	Module 3
GO:0016358	dendrite development	30/1121	247/18866	0.000158994	0.00874304	0.00773793	CDC42/DVL1/MTOR/DLG5/ILK/NFATC4/MAP1A/EEF2K/TAOK2/FBXO31/MINK1/NTN1/SARM1/STK11/PTPRS/GSK3A/OBSL1/SS18L2/CAMK1/IQSEC1/GORASP1/DBN1/ARID1B/CUL7/RTN4IP1/CUX1/DAB2IP/NSMF/HDAC6/MECP2	30	Module 3
GO:0032091	negative regulation of protein binding	17/1121	106/18866	0.000163893	0.00892139	0.00789577	PTPRF/CFHR1/DVL1/CTNNBIP1/CARD16/NFATC4/AKT1/B2M/STUB1/MAPK3/ATP2A3/GTF2F1/SYMPK/DNAJB2/PPARA/CAMK1/GPSM1	17	Module 3
GO:0033044	regulation of chromosome organization	39/1121	356/18866	0.000170822	0.00911769	0.0080695	SKI/PINK1/LMNA/PYGO2/SMG5/NAA40/SSRP1/NUMA1/NABP2/PML/RNF40/GLYR1/MAPK3/SUPT6H/MLLT6/SMG6/CTC1/FLCN/KAT2A/MAP2K7/UPF1/KMT2B/TRIM28/BRD4/AKAP8/PAF1/XRCC1/ZNF335/HIRA/GNL3/TADA3/CTBP1/PTTG1/PHF1/MAD1L1/PHF2/PHF19/PHF8/MECP2	39	Module 3
GO:0010821	regulation of mitochondrion organization	25/1121	191/18866	0.000170883	0.00911769	0.0080695	PINK1/HAX1/LMNA/RHOU/HIP1R/CAMKK2/INF2/PPP1R13B/AKT1/TSC2/CLEC16A/CSNK2A2/FLCN/USP36/SPIRE1/GSK3A/EP300/SREBF2/BAP1/ABLIM3/VDAC1/FIS1/BNIP3L/HDAC6/HUWE1	25	Module 3
GO:0005996	monosaccharide metabolic process	34/1121	296/18866	0.000179272	0.00947151	0.00838265	H6PD/WDTC1/MTOR/CRTC2/CREM/LRP5/INPPL1/CPT1A/IRS2/AKT1/MAN2A2/MAN2C1/MLYCD/NFE2L1/C1QTNF1/FOXK2/KAT2A/INSR/AKT2/GSK3A/KHK/RPIA/POFUT1/SOGA1/POFUT2/EP300/PPARA/SLC25A1/PMM1/CYB5R3/NISCH/MAN2B2/FOXK1/PGAM2	34	Module 3
GO:2000058	regulation of ubiquitin-dependent protein catabolic process	22/1121	159/18866	0.000184779	0.00961852	0.00851276	DVL1/UBQLN4/USP5/AKT1/MAP1A/PML/STUB1/CLEC16A/CSNK2A2/CSNK1D/FZR1/RAD23A/KEAP1/GIPC1/GSK3A/DNAJB2/BAG6/HIPK2/CCAR2/ZER1/ARAF/UBQLN2	22	Module 3
GO:0048015	phosphatidylinositol-mediated signaling	25/1121	192/18866	0.000185624	0.00961852	0.00851276	HAX1/PEAR1/NGF/PI4KB/PIK3C2B/UNC5B/PIP4K2A/PLCB3/GAB2/PITPNM2/IRS2/AKT1/TSC2/MAPK3/ERBB2/PLCD3/PIP5K1C/INSR/PI4KA/PLCD1/RGL2/GSN/DAB2IP/NCS1/INPP5E	25	Module 3
GO:0032535	regulation of cellular component size	41/1121	383/18866	0.000193772	0.0099451	0.0088018	WDTC1/HAX1/MTOR/WASF2/NGF/ILK/SSH3/ESAM/LRP1/HIP1R/AKT1/TNFRSF12A/SLC12A4/NTN1/RPTOR/MYO1C/CDC42EP4/SPIRE1/PLEKHG2/PPP1R15A/PTPRS/SEMA4F/SEMA4C/CDC42EP1/PICK1/VILL/SEMA3F/SEMA3B/NCK1/WDR1/DBN1/SRF/PLXNA4/ACTR3C/GSN/SPTAN1/LRRC8A/ABL1/GBA2/GDI1/PLXNA3	41	Module 3
GO:0042110	T cell activation	90/943	483/18866	4.99256e-28	2.68101e-24	2.06902e-24	CD2/FCER1G/FCGR2B/XCL1/PTPRC/CR1/NLRP3/PTPN22/SLAMF6/DUSP10/APBB1IP/MAP3K8/IL2RA/PRKCQ/PSAP/CD3E/CD3G/CRTAM/PAK1/IL18/JAML/CD4/NCKAP1L/P2RX7/TESPA1/IGF1/LCP1/PNP/LGALS3/RASGRP1/CORO1A/ITGAL/NOD2/TMEM98/CD300A/CCL5/MALT1/VAV1/LILRB1/LILRB2/CD28/ICOS/SLC11A1/ADAM17/PELI1/CD8A/IL1B/DPP4/MAFB/CXADR/GRAP2/RAC2/FANCD2/CCR2/CD86/PAK2/CD80/TFRC/LEF1/IL7R/PTGER4/F2RL1/CAMK4/ITK/DOCK2/IRF1/HAVCR2/CD83/BTN3…	90	Module 5
GO:0070661	leukocyte proliferation	65/943	313/18866	3.81183e-23	1.02348e-19	7.89852e-20	FCGR2B/XCL1/PTPRC/VAV3/PTPN22/HHEX/HELLS/IL2RA/PRKCQ/CD3E/CRTAM/IL18/CD4/NCKAP1L/P2RX7/IGF1/PNP/LGALS3/RASGRP1/CORO1A/CCL8/CD300A/CCL5/IKZF3/MALT1/LILRB1/BST2/TYROBP/LILRB2/CD28/SLC11A1/INPP5D/PELI1/IL1B/RAC2/CCR2/CD86/CD80/TFRC/LEF1/IL7R/GAPT/F2RL1/DOCK2/CD180/IRF1/CSF1R/HAVCR2/BTN3A1/TNFAIP3/HLA-DMB/HLA-DPA1/TREM2/TNFRSF21/FYN/GPNMB/PIK3CG/LYN/RIPK2/IL7/DOCK8/SYK/TNFSF8/VSIG4/BTK	65	Module 5
GO:0050863	regulation of T cell activation	66/943	332/18866	2.21206e-22	3.95959e-19	3.05575e-19	CD2/FCGR2B/XCL1/PTPRC/CR1/NLRP3/PTPN22/DUSP10/MAP3K8/IL2RA/PRKCQ/CD3E/CRTAM/PAK1/IL18/CD4/NCKAP1L/TESPA1/IGF1/PNP/LGALS3/RASGRP1/CORO1A/NOD2/CD300A/CCL5/MALT1/VAV1/LILRB1/LILRB2/CD28/ICOS/PELI1/IL1B/DPP4/GRAP2/RAC2/FANCD2/CCR2/CD86/PAK2/CD80/TFRC/LEF1/IL7R/CAMK4/IRF1/HAVCR2/CD83/PRDM1/HLA-DMB/HLA-DOA/HLA-DPA1/TNFRSF21/FYN/VNN1/GPNMB/LYN/RIPK2/TOX/IL7/PAG1/DOCK8/SYK/TNFSF8/VSIG4	66	Module 5
GO:0007159	leukocyte cell-cell adhesion	69/943	364/18866	4.04724e-22	5.43341e-19	4.19315e-19	FCGR2B/XCL1/PTPRC/NLRP3/PTPN22/DUSP10/MAP3K8/ALOX5/IL2RA/PRKCQ/CD3E/CRTAM/PAK1/IL18/CD4/NCKAP1L/ITGB7/TESPA1/IGF1/SELPLG/PNP/LGALS3/RASGRP1/CORO1A/ITGAL/NOD2/CD300A/CCL5/SKAP1/PECAM1/MALT1/VAV1/LILRB1/LILRB2/ITGA4/CD28/ICOS/PELI1/IL1B/DPP4/ITGB2/GRAP2/RAC2/CCR2/CD86/PAK2/CD80/TFRC/SLC39A8/LEF1/IL7R/IRF1/HAVCR2/CD83/ADTRP/HLA-DMB/HLA-DPA1/TNFRSF21/FYN/VNN1/GPNMB/LYN/RIPK2/IL7/PAG1/DOCK8/GCNT1/SYK/…	69	Module 5
GO:0043312	neutrophil degranulation	81/943	487/18866	5.65168e-22	6.06991e-19	4.68435e-19	CD53/FCER1G/FCGR2A/HSPA6/PTPRC/CR1/NRAS/CTSS/S100A11/CHI3L1/CHIT1/ALOX5/PLAU/PSAP/AMPD3/PTPRJ/COMMD9/FTH1/PRCP/CTSC/MMP8/NCKAP1L/LYZ/C3AR1/BIN2/GPR84/GNS/LTA4H/PNP/LGALS3/PYGL/SERPINA1/ATP8B4/ADAM10/ANXA2/CTSH/ITGAL/CD68/ATP6V0A1/CD300A/ORMDL3/PECAM1/C5AR1/FTL/CD33/BST2/TYROBP/PLAUR/FPR1/LILRB2/LAIR1/RAB10/SLC11A1/SNAP25/MMP9/CD93/DSN1/CSTB/ITGB2/SNAP29/ATG7/RAP2B/GLB1/HPSE/MANBA/HEXB/IQGAP2/GM2A…	81	Module 5
GO:0002283	neutrophil activation involved in immune response	81/943	490/18866	8.44463e-22	7.55795e-19	5.83272e-19	CD53/FCER1G/FCGR2A/HSPA6/PTPRC/CR1/NRAS/CTSS/S100A11/CHI3L1/CHIT1/ALOX5/PLAU/PSAP/AMPD3/PTPRJ/COMMD9/FTH1/PRCP/CTSC/MMP8/NCKAP1L/LYZ/C3AR1/BIN2/GPR84/GNS/LTA4H/PNP/LGALS3/PYGL/SERPINA1/ATP8B4/ADAM10/ANXA2/CTSH/ITGAL/CD68/ATP6V0A1/CD300A/ORMDL3/PECAM1/C5AR1/FTL/CD33/BST2/TYROBP/PLAUR/FPR1/LILRB2/LAIR1/RAB10/SLC11A1/SNAP25/MMP9/CD93/DSN1/CSTB/ITGB2/SNAP29/ATG7/RAP2B/GLB1/HPSE/MANBA/HEXB/IQGAP2/GM2A…	81	Module 5
GO:0046651	lymphocyte proliferation	58/943	283/18866	1.77753e-20	1.36362e-17	1.05235e-17	FCGR2B/XCL1/PTPRC/VAV3/PTPN22/HELLS/IL2RA/PRKCQ/CD3E/CRTAM/IL18/CD4/NCKAP1L/P2RX7/IGF1/PNP/LGALS3/RASGRP1/CORO1A/CD300A/CCL5/IKZF3/MALT1/LILRB1/TYROBP/LILRB2/CD28/SLC11A1/INPP5D/PELI1/IL1B/RAC2/CCR2/CD86/CD80/TFRC/LEF1/IL7R/GAPT/DOCK2/CD180/IRF1/HAVCR2/BTN3A1/HLA-DMB/HLA-DPA1/TNFRSF21/FYN/GPNMB/PIK3CG/LYN/RIPK2/IL7/DOCK8/SYK/TNFSF8/VSIG4/BTK	58	Module 5
GO:0032943	mononuclear cell proliferation	58/943	286/18866	3.04836e-20	2.04621e-17	1.57913e-17	FCGR2B/XCL1/PTPRC/VAV3/PTPN22/HELLS/IL2RA/PRKCQ/CD3E/CRTAM/IL18/CD4/NCKAP1L/P2RX7/IGF1/PNP/LGALS3/RASGRP1/CORO1A/CD300A/CCL5/IKZF3/MALT1/LILRB1/TYROBP/LILRB2/CD28/SLC11A1/INPP5D/PELI1/IL1B/RAC2/CCR2/CD86/CD80/TFRC/LEF1/IL7R/GAPT/DOCK2/CD180/IRF1/HAVCR2/BTN3A1/HLA-DMB/HLA-DPA1/TNFRSF21/FYN/GPNMB/PIK3CG/LYN/RIPK2/IL7/DOCK8/SYK/TNFSF8/VSIG4/BTK	58	Module 5
GO:1902105	regulation of leukocyte differentiation	58/943	290/18866	6.18041e-20	3.68765e-17	2.84588e-17	C1QC/CD2/SLAMF8/FCGR2B/PTPRC/CR1/GPR137B/NLRP3/DUSP10/IL2RA/UBASH3B/CRTAM/IL18/CD4/NCKAP1L/TESPA1/PNP/RASGRP1/EVI2B/CCL3/IKZF3/MALT1/LILRB1/TYROBP/LILRB2/TMEM178A/CD28/INPP5D/IL1B/RASSF2/MAFB/FANCD2/CCR2/MITF/CD86/CCR1/CD80/HCLS1/LEF1/IL7R/CAMK4/IRF1/CD83/PRDM1/HLA-DOA/TREM2/VNN1/TMEM176A/TMEM176B/LYN/CA2/RIPK2/DCSTAMP/MYC/TOX/IL7/SYK/BTK	58	Module 5
GO:1903037	regulation of leukocyte cell-cell adhesion	62/943	329/18866	7.55924e-20	4.05931e-17	3.13271e-17	FCGR2B/XCL1/PTPRC/NLRP3/PTPN22/DUSP10/MAP3K8/ALOX5/IL2RA/PRKCQ/CD3E/CRTAM/PAK1/IL18/CD4/NCKAP1L/TESPA1/IGF1/PNP/LGALS3/RASGRP1/CORO1A/NOD2/CD300A/CCL5/SKAP1/MALT1/VAV1/LILRB1/LILRB2/ITGA4/CD28/ICOS/PELI1/IL1B/DPP4/ITGB2/GRAP2/CCR2/CD86/PAK2/CD80/TFRC/LEF1/IL7R/IRF1/HAVCR2/CD83/ADTRP/HLA-DMB/HLA-DPA1/TNFRSF21/FYN/VNN1/GPNMB/LYN/RIPK2/IL7/PAG1/DOCK8/SYK/VSIG4	62	Module 5
GO:0001819	positive regulation of cytokine production	73/943	447/18866	1.98273e-19	9.67935e-17	7.46988e-17	PDE4B/IL12RB2/CD2/PYHIN1/FCER1G/XCL1/PTPRC/NLRP3/GBP5/PTPN22/AIM2/SLAMF6/CD244/TLR5/PRKCQ/PTPRJ/BIRC3/CD3E/CRTAM/MMP8/CASP1/IL18/CADM1/CD4/P2RX7/C3AR1/HIF1A/THBS1/IL16/RASGRP1/NOD2/IRF8/SCIMP/CCL3/BRCA1/RNF125/MALT1/CD226/C5AR1/LILRB1/TYROBP/CARD8/LILRB2/CD28/SLC11A1/ADAM17/NLRC4/CYP1B1/PELI1/IL1B/STAT1/CCR2/CD86/CD80/TLR6/TXK/HPSE/PTGER4/F2RL1/IRF1/HAVCR2/CD83/MAPK13/HLA-DPA1/TREM2/AKIRIN2/CD36/…	73	Module 5
GO:1903039	positive regulation of leukocyte cell-cell adhesion	51/943	235/18866	2.77731e-19	1.24285e-16	9.59147e-17	XCL1/PTPRC/NLRP3/PTPN22/DUSP10/MAP3K8/ALOX5/IL2RA/PRKCQ/CD3E/PAK1/IL18/CD4/NCKAP1L/TESPA1/IGF1/PNP/RASGRP1/CORO1A/NOD2/CCL5/SKAP1/MALT1/VAV1/LILRB1/LILRB2/ITGA4/CD28/ICOS/IL1B/DPP4/ITGB2/GRAP2/CCR2/CD86/PAK2/CD80/TFRC/LEF1/IL7R/HAVCR2/CD83/HLA-DMB/HLA-DPA1/FYN/VNN1/LYN/RIPK2/IL7/DOCK8/SYK	51	Module 5
GO:0050870	positive regulation of T cell activation	47/943	214/18866	4.33649e-18	1.79131e-15	1.38241e-15	XCL1/PTPRC/NLRP3/PTPN22/DUSP10/MAP3K8/IL2RA/PRKCQ/CD3E/PAK1/IL18/CD4/NCKAP1L/TESPA1/IGF1/PNP/RASGRP1/CORO1A/NOD2/CCL5/MALT1/VAV1/LILRB1/LILRB2/CD28/ICOS/IL1B/DPP4/GRAP2/CCR2/CD86/PAK2/CD80/TFRC/LEF1/IL7R/HAVCR2/CD83/HLA-DMB/HLA-DPA1/FYN/VNN1/LYN/RIPK2/IL7/DOCK8/SYK	47	Module 5
GO:0030098	lymphocyte differentiation	63/943	368/18866	5.88826e-18	2.25857e-15	1.74301e-15	CD2/SLAMF8/FCER1G/FCGR2B/PTPRC/CR1/NLRP3/PTPN22/SLAMF6/DUSP10/HHEX/IL2RA/PSAP/BLNK/PTPRJ/CD3E/CD3G/CRTAM/IL18/CD4/NCKAP1L/TESPA1/PNP/RASGRP1/TMEM98/IKZF3/MALT1/VAV1/LILRB2/MERTK/ITGA4/CD28/INPP5D/ADAM17/CD8A/IL1B/MAFB/FANCD2/CMTM7/CCR2/CD86/CD80/LEF1/IL7R/PTGER4/CAMK4/ITK/DOCK2/IRF1/CD83/PRDM1/HLA-DOA/THEMIS/VNN1/IKZF1/CHD7/RIPK2/TOX/IL7/CTSL/SYK/TNFSF8/BTK	63	Module 5
GO:0030217	T cell differentiation	51/943	253/18866	7.92527e-18	2.83725e-15	2.1896e-15	CD2/FCER1G/PTPRC/CR1/NLRP3/PTPN22/SLAMF6/DUSP10/IL2RA/PSAP/CD3E/CD3G/CRTAM/IL18/CD4/NCKAP1L/TESPA1/PNP/RASGRP1/TMEM98/MALT1/VAV1/LILRB2/CD28/ADAM17/CD8A/IL1B/MAFB/FANCD2/CCR2/CD86/CD80/LEF1/IL7R/PTGER4/CAMK4/ITK/DOCK2/IRF1/CD83/PRDM1/HLA-DOA/THEMIS/VNN1/CHD7/RIPK2/TOX/IL7/CTSL/SYK/TNFSF8	51	Module 5
GO:0002696	positive regulation of leukocyte activation	66/943	406/18866	1.46062e-17	4.90222e-15	3.78321e-15	CD2/FCER1G/XCL1/PTPRC/NLRP3/VAV3/PTPN22/DUSP10/MAP3K8/IL2RA/PRKCQ/CD3E/PAK1/CTSC/MMP8/IL18/CD4/NCKAP1L/TESPA1/IGF1/PNP/THBS1/RASGRP1/CORO1A/NOD2/CCL5/CCL3/MIR142/MALT1/CD226/VAV1/LILRB1/TYROBP/LILRB2/CD28/ICOS/INPP5D/PELI1/IL1B/DPP4/ITGB2/GRAP2/CCR2/CD86/PAK2/CD80/TFRC/TLR6/LEF1/IL7R/F2RL1/HAVCR1/HAVCR2/CD83/HLA-DMB/HLA-DPA1/TREM2/FYN/VNN1/LYN/RIPK2/TOX/IL7/DOCK8/SYK/BTK	66	Module 5
GO:0042098	T cell proliferation	44/943	195/18866	1.73212e-17	5.47145e-15	4.2225e-15	XCL1/PTPRC/PTPN22/IL2RA/PRKCQ/CD3E/CRTAM/IL18/CD4/NCKAP1L/P2RX7/IGF1/PNP/LGALS3/RASGRP1/CORO1A/CCL5/MALT1/LILRB1/LILRB2/CD28/SLC11A1/PELI1/IL1B/RAC2/CCR2/CD86/CD80/TFRC/DOCK2/IRF1/HAVCR2/BTN3A1/HLA-DMB/HLA-DPA1/TNFRSF21/FYN/GPNMB/PIK3CG/RIPK2/DOCK8/SYK/TNFSF8/VSIG4	44	Module 5
GO:0070663	regulation of leukocyte proliferation	49/943	240/18866	2.04469e-17	6.1e-15	4.70758e-15	FCGR2B/XCL1/PTPRC/VAV3/PTPN22/HHEX/IL2RA/PRKCQ/CD3E/CRTAM/IL18/CD4/NCKAP1L/IGF1/PNP/LGALS3/CORO1A/CCL8/CD300A/CCL5/IKZF3/LILRB1/BST2/TYROBP/LILRB2/CD28/INPP5D/PELI1/IL1B/RAC2/CCR2/CD86/CD80/TFRC/IRF1/CSF1R/HAVCR2/TNFAIP3/HLA-DMB/HLA-DPA1/TNFRSF21/GPNMB/LYN/RIPK2/IL7/SYK/TNFSF8/VSIG4/BTK	49	Module 5
GO:0050867	positive regulation of cell activation	67/943	421/18866	2.54055e-17	7.18041e-15	5.54136e-15	CD2/FCER1G/XCL1/PTPRC/NLRP3/VAV3/PTPN22/DUSP10/MAP3K8/IL2RA/PRKCQ/CD3E/PAK1/CTSC/MMP8/IL18/CD4/NCKAP1L/TESPA1/IGF1/PNP/THBS1/RASGRP1/CORO1A/NOD2/CCL5/CCL3/MIR142/MALT1/CD226/VAV1/LILRB1/TYROBP/LILRB2/PLEK/CD28/ICOS/INPP5D/PELI1/IL1B/DPP4/ITGB2/GRAP2/CCR2/CD86/PAK2/CD80/TFRC/TLR6/LEF1/IL7R/F2RL1/HAVCR1/HAVCR2/CD83/HLA-DMB/HLA-DPA1/TREM2/FYN/VNN1/LYN/RIPK2/TOX/IL7/DOCK8/SYK/BTK	67	Module 5
GO:0022409	positive regulation of cell-cell adhesion	53/943	279/18866	2.6988e-17	7.24629e-15	5.59221e-15	XCL1/PTPRC/NLRP3/PTPN22/DUSP10/MAP3K8/ALOX5/IL2RA/PRKCQ/CD3E/PAK1/IL18/CD4/NCKAP1L/TESPA1/IGF1/PNP/RASGRP1/CORO1A/NOD2/CCL5/SKAP1/MALT1/VAV1/LILRB1/PLAUR/LILRB2/ITGA6/ITGA4/CD28/ICOS/IL1B/DPP4/ITGB2/GRAP2/CCR2/CD86/PAK2/CD80/TFRC/LEF1/IL7R/HAVCR2/CD83/HLA-DMB/HLA-DPA1/FYN/VNN1/LYN/RIPK2/IL7/DOCK8/SYK	53	Module 5
GO:0045785	positive regulation of cell adhesion	67/943	428/18866	6.04743e-17	1.49879e-14	1.15667e-14	XCL1/PTPRC/NLRP3/VAV3/PTPN22/MYOC/DUSP10/APBB1IP/MAP3K8/ALOX5/IL2RA/PRKCQ/NRP1/PTPRJ/CD3E/PAK1/IL18/CD4/NCKAP1L/TESPA1/IGF1/PNP/FMN1/RASGRP1/CORO1A/NOD2/CCL5/SKAP1/MALT1/VAV1/LILRB1/PLAUR/LILRB2/LIMS1/ITGA6/ITGA4/CD28/ICOS/IL1B/DPP4/STK4/CASS4/ITGB2/GRAP2/CCR2/CD86/PAK2/CD80/TFRC/LEF1/SFRP2/IL7R/ITGA2/HAVCR2/CD83/VEGFA/HLA-DMB/HLA-DPA1/FYN/VNN1/CD36/ADAM9/LYN/RIPK2/IL7/DOCK8/SYK	67	Module 5
GO:0022407	regulation of cell-cell adhesion	68/943	439/18866	6.14029e-17	1.49879e-14	1.15667e-14	FCGR2B/XCL1/PTPRC/NLRP3/PTPN22/DUSP10/MAP3K8/ALOX5/IL2RA/PRKCQ/CD3E/UBASH3B/CRTAM/PAK1/IL18/CD4/NCKAP1L/TESPA1/IGF1/PNP/LGALS3/RASGRP1/CORO1A/NOD2/CD300A/CCL5/SKAP1/MALT1/VAV1/SPINT2/LILRB1/PLAUR/LILRB2/IL1RN/ITGA6/ITGA4/CD28/ICOS/PELI1/IL1B/DPP4/ITGB2/GRAP2/CCR2/CD86/PAK2/CD80/TFRC/LEF1/IL7R/IRF1/HAVCR2/CD83/VEGFA/ADTRP/HLA-DMB/HLA-DPA1/TNFRSF21/FYN/VNN1/GPNMB/LYN/RIPK2/IL7/PAG1/DOCK8/SYK/VSIG4	68	Module 5
GO:0002697	regulation of immune effector process	70/943	470/18866	1.73858e-16	4.0592e-14	3.13262e-14	C1QA/C1QC/C1QB/SLAMF8/FCER1G/FCGR2B/XCL1/PTPRC/CR1/NLRP3/PTPN22/AIM2/SLAMF6/CD84/CD244/DUSP10/IL2RA/PTPRJ/BIRC3/CRTAM/MMP12/IL18/CADM1/P2RX7/C12orf4/C3AR1/LGALS3/RASGRP1/NOD2/CD300A/SCIMP/RNF125/MALT1/CD226/VAV1/C5AR1/LILRB1/ADGRE2/BST2/TYROBP/IL18RAP/CD28/IL1B/STAT1/ITGB2/APOBEC3F/APOBEC3G/RAC2/CCR2/CD96/CD86/DTX3L/CD80/TFRC/CFI/IL7R/C7/F2RL1/HAVCR2/C2/TNFAIP3/SERPINB9/HLA-DMB/CD36/LYN/RIPK2/SYK…	70	Module 5
GO:0060326	cell chemotaxis	55/943	311/18866	1.82994e-16	4.0945e-14	3.15986e-14	PDE4B/SLAMF8/FCER1G/XCL1/VAV3/ALOX5/PRKCQ/NRP1/JAML/NCKAP1L/P2RX4/C3AR1/BIN2/FLT1/EDNRB/LGALS3/LGMN/THBS1/IL16/ADAM10/CORO1A/CCL8/CCL18/NUP85/CXCL16/CCL5/CCL3/VAV1/C5AR1/ADGRE2/ADAM17/IL1B/CXCR4/DPP4/CXADR/TIAM1/ITGB2/RAC2/CXCR6/CCR2/AGTR1/CCR1/CXCL10/CXCL11/LEF1/VEGFC/F2RL1/CSF1R/VEGFA/PLA2G7/PIK3CG/DOCK4/LYN/SYK/MPP1	55	Module 5
GO:0030595	leukocyte chemotaxis	46/943	232/18866	6.46579e-16	1.38885e-13	1.07182e-13	PDE4B/SLAMF8/FCER1G/XCL1/VAV3/ALOX5/JAML/NCKAP1L/C3AR1/FLT1/EDNRB/LGALS3/LGMN/THBS1/IL16/ADAM10/CORO1A/CCL8/CCL18/NUP85/CXCL16/CCL5/CCL3/VAV1/C5AR1/ADGRE2/ADAM17/IL1B/CXCR4/DPP4/CXADR/ITGB2/RAC2/CCR2/CCR1/CXCL10/CXCL11/VEGFC/F2RL1/CSF1R/VEGFA/PLA2G7/PIK3CG/LYN/SYK/MPP1	46	Module 5
GO:0050670	regulation of lymphocyte proliferation	44/943	219/18866	1.68169e-15	3.47334e-13	2.6805e-13	FCGR2B/XCL1/PTPRC/VAV3/PTPN22/IL2RA/PRKCQ/CD3E/CRTAM/IL18/CD4/NCKAP1L/IGF1/PNP/LGALS3/CORO1A/CD300A/CCL5/IKZF3/LILRB1/TYROBP/LILRB2/CD28/INPP5D/PELI1/IL1B/RAC2/CCR2/CD86/CD80/TFRC/IRF1/HAVCR2/HLA-DMB/HLA-DPA1/TNFRSF21/GPNMB/LYN/RIPK2/IL7/SYK/TNFSF8/VSIG4/BTK	44	Module 5
GO:0032944	regulation of mononuclear cell proliferation	44/943	221/18866	2.38434e-15	4.74218e-13	3.6597e-13	FCGR2B/XCL1/PTPRC/VAV3/PTPN22/IL2RA/PRKCQ/CD3E/CRTAM/IL18/CD4/NCKAP1L/IGF1/PNP/LGALS3/CORO1A/CD300A/CCL5/IKZF3/LILRB1/TYROBP/LILRB2/CD28/INPP5D/PELI1/IL1B/RAC2/CCR2/CD86/CD80/TFRC/IRF1/HAVCR2/HLA-DMB/HLA-DPA1/TNFRSF21/GPNMB/LYN/RIPK2/IL7/SYK/TNFSF8/VSIG4/BTK	44	Module 5
GO:0097529	myeloid leukocyte migration	44/943	222/18866	2.8343e-15	5.43579e-13	4.19498e-13	PDE4B/SLAMF8/FCER1G/XCL1/VAV3/JAML/NCKAP1L/P2RX4/C3AR1/FLT1/EDNRB/LGALS3/LGMN/THBS1/CCL8/CCL18/CD300A/NUP85/CCL5/CCL3/PECAM1/VAV1/C5AR1/ADGRE2/IL1B/DPP4/CXADR/ITGB2/RAC2/CCR2/CCR1/CD200R1/CXCL10/CXCL11/VEGFC/PTGER4/CSF1R/VEGFA/TREM2/PLA2G7/PIK3CG/LYN/SYK/MPP1	44	Module 5
GO:0002683	negative regulation of immune system process	65/943	463/18866	3.86219e-14	7.15171e-12	5.51922e-12	C1QC/SLAMF8/FCER1G/FCGR2B/XCL1/PTPRC/CR1/GPR137B/PTPN22/CD84/DUSP10/IL2RA/NR1H3/PTPRJ/UBASH3B/CRTAM/LPXN/MMP12/ELF1/LGALS3/THBS1/CD68/CD300A/CCL3/RNF125/LILRB1/BST2/TYROBP/LILRB2/TMEM178A/MERTK/INPP5D/PELI1/NMI/DPP4/SAMHD1/MAFB/SAMSN1/PPARG/CCR2/CD96/CD86/GCSAM/CD200R1/CD80/GPR171/IL7R/PTGER4/IRF1/HAVCR2/TNFAIP3/SERPINB9/ADTRP/HLA-DOA/TNFRSF21/GPNMB/TMEM176A/TMEM176B/NCAPG2/LYN/MYC/PAG1/SH2D1A/VS…	65	Module 5
GO:0002703	regulation of leukocyte mediated immunity	40/943	211/18866	2.42973e-13	4.34922e-11	3.35644e-11	FCER1G/FCGR2B/XCL1/PTPRC/CR1/NLRP3/SLAMF6/CD84/CRTAM/IL18/CADM1/P2RX7/C12orf4/RASGRP1/NOD2/CD300A/SCIMP/MALT1/CD226/VAV1/LILRB1/ADGRE2/BST2/TYROBP/IL18RAP/CD28/IL1B/ITGB2/RAC2/CCR2/CD96/TFRC/IL7R/F2RL1/HAVCR2/SERPINB9/LYN/SYK/SH2D1A/BTK	40	Module 5
GO:0002699	positive regulation of immune effector process	41/943	223/18866	3.52535e-13	6.03313e-11	4.65597e-11	FCER1G/XCL1/PTPRC/NLRP3/PTPN22/SLAMF6/CD84/CD244/PTPRJ/CRTAM/IL18/CADM1/P2RX7/C12orf4/RASGRP1/NOD2/CD300A/SCIMP/MALT1/CD226/VAV1/LILRB1/ADGRE2/TYROBP/IL18RAP/CD28/IL1B/ITGB2/RAC2/CCR2/CD86/CD80/TFRC/F2RL1/HLA-DMB/CD36/LYN/RIPK2/SYK/SH2D1A/BTK	41	Module 5
GO:0042129	regulation of T cell proliferation	35/943	167/18866	3.59516e-13	6.03313e-11	4.65597e-11	XCL1/PTPRC/PTPN22/IL2RA/PRKCQ/CD3E/CRTAM/IL18/CD4/NCKAP1L/IGF1/PNP/LGALS3/CORO1A/CCL5/LILRB1/LILRB2/CD28/PELI1/IL1B/RAC2/CCR2/CD86/CD80/TFRC/IRF1/HAVCR2/HLA-DMB/HLA-DPA1/TNFRSF21/GPNMB/RIPK2/SYK/TNFSF8/VSIG4	35	Module 5
GO:1903706	regulation of hemopoiesis	66/943	498/18866	3.81707e-13	6.21142e-11	4.79356e-11	C1QC/CD2/SLAMF8/FCGR2B/PTPRC/CR1/GPR137B/NLRP3/DUSP10/IL2RA/PRKCQ/UBASH3B/CRTAM/IL18/CD4/NCKAP1L/TESPA1/PNP/LGALS3/HIF1A/THBS1/RASGRP1/EVI2B/CCL3/IKZF3/MALT1/LILRB1/TYROBP/LILRB2/TMEM178A/CD28/INPP5D/IL1B/STAT1/RASSF2/MAFB/FANCD2/CCR2/MITF/CD86/CCR1/CD80/HCLS1/GPR171/LEF1/IL7R/CAMK4/IRF1/CD83/PRDM1/HLA-DOA/TREM2/VNN1/TMEM176A/TMEM176B/NCAPG2/LYN/CA2/RIPK2/DCSTAMP/MYC/TOX/IL7/SYK/BTK/RAB7B	66	Module 5
GO:0002831	regulation of response to biotic stimulus	58/943	409/18866	6.21028e-13	9.80859e-11	7.56962e-11	PYHIN1/SLAMF8/FCER1G/FCGR2B/CR1/GBP5/PTPN22/NRAS/AIM2/SLAMF6/DUSP10/IL2RA/NR1H3/BIRC3/CRTAM/PAK1/MMP12/CADM1/RASGRP1/SCIMP/CCL5/RNF125/MALT1/CD226/VAV1/LILRB1/CARD8/IL18RAP/NLRC4/IL1B/NMI/STAT1/HCK/SAMHD1/IFNAR2/IFNGR2/APOBEC3F/APOBEC3G/PPARG/CD96/DTX3L/PAK2/TXK/F2RL1/CD180/IRF1/HAVCR2/TNFAIP3/SERPINB9/TREM2/FYN/IFNGR1/CD36/LYN/RIPK2/SYK/SH2D1A/VSIG4	58	Module 5
GO:0045619	regulation of lymphocyte differentiation	36/943	181/18866	8.66991e-13	1.33021e-10	1.02657e-10	CD2/SLAMF8/PTPRC/CR1/NLRP3/DUSP10/IL2RA/CRTAM/IL18/NCKAP1L/TESPA1/PNP/RASGRP1/IKZF3/MALT1/LILRB2/CD28/INPP5D/IL1B/FANCD2/CCR2/CD86/CD80/LEF1/IL7R/CAMK4/IRF1/CD83/PRDM1/HLA-DOA/VNN1/RIPK2/TOX/IL7/SYK/BTK	36	Module 5
GO:0046631	alpha-beta T cell activation	32/943	146/18866	1.02076e-12	1.48673e-10	1.14736e-10	XCL1/PTPRC/NLRP3/PTPN22/SLAMF6/PRKCQ/PSAP/CD3E/CRTAM/IL18/NCKAP1L/PNP/TMEM98/CD300A/MALT1/LILRB1/CD28/CCR2/CD86/CD80/LEF1/PTGER4/ITK/DOCK2/IRF1/CD83/PRDM1/RIPK2/TOX/CTSL/SYK/TNFSF8	32	Module 5
GO:0051251	positive regulation of lymphocyte activation	53/943	357/18866	1.02438e-12	1.48673e-10	1.14736e-10	XCL1/PTPRC/NLRP3/VAV3/PTPN22/DUSP10/MAP3K8/IL2RA/PRKCQ/CD3E/PAK1/IL18/CD4/NCKAP1L/TESPA1/IGF1/PNP/RASGRP1/CORO1A/NOD2/CCL5/MALT1/VAV1/LILRB1/TYROBP/LILRB2/CD28/ICOS/INPP5D/PELI1/IL1B/DPP4/GRAP2/CCR2/CD86/PAK2/CD80/TFRC/LEF1/IL7R/HAVCR2/CD83/HLA-DMB/HLA-DPA1/FYN/VNN1/LYN/RIPK2/TOX/IL7/DOCK8/SYK/BTK	53	Module 5
GO:0032612	interleukin-1 production	29/943	121/18866	1.08355e-12	1.53122e-10	1.1817e-10	PYHIN1/NLRP3/GBP5/AIM2/CASP1/P2RX7/IGF1/IL16/NOD2/TMEM106A/CCL3/MIR142/MALT1/CD33/ACP5/TYROBP/CARD8/NLRC4/IL1B/TLR6/F2RL1/HAVCR2/TNFAIP3/SERPINB1/TREM2/CD36/LPL/RIPK2/ABCA1	29	Module 5
GO:0045580	regulation of T cell differentiation	32/943	150/18866	2.22397e-12	3.06224e-10	2.36324e-10	CD2/PTPRC/CR1/NLRP3/DUSP10/IL2RA/CRTAM/IL18/NCKAP1L/TESPA1/PNP/RASGRP1/MALT1/LILRB2/CD28/IL1B/FANCD2/CCR2/CD86/CD80/LEF1/IL7R/CAMK4/IRF1/CD83/PRDM1/HLA-DOA/VNN1/RIPK2/TOX/IL7/SYK	32	Module 5
GO:0002237	response to molecule of bacterial origin	52/943	356/18866	3.18389e-12	4.27437e-10	3.29867e-10	PDE4B/IL12RB2/FCGR2B/KMO/NLRP3/PTPN22/DUSP10/MRC1/NR1H3/IL10RA/CASP1/IL18/P2RX7/EDNRB/NOD2/IRF8/CD68/SCIMP/CCL5/CCL3/MIR142/MALT1/C5AR1/LILRB1/ACP5/CARD8/LILRB2/SLC11A1/ADAM17/PELI1/IL1B/HCK/CD96/CD86/CD80/CLDN1/TLR6/CXCL10/CXCL11/SNCA/HPGD/PTGER4/CD180/HAVCR2/TNFAIP3/TREM2/AKIRIN2/CD36/ADAM9/LYN/RIPK2/ABCA1	52	Module 5
GO:0032496	response to lipopolysaccharide	50/943	334/18866	3.31355e-12	4.33994e-10	3.34928e-10	PDE4B/IL12RB2/KMO/NLRP3/PTPN22/DUSP10/MRC1/NR1H3/IL10RA/CASP1/IL18/P2RX7/EDNRB/NOD2/IRF8/CD68/SCIMP/CCL5/CCL3/MIR142/MALT1/C5AR1/LILRB1/ACP5/CARD8/LILRB2/SLC11A1/ADAM17/PELI1/IL1B/HCK/CD96/CD86/CD80/CLDN1/CXCL10/CXCL11/SNCA/HPGD/PTGER4/CD180/HAVCR2/TNFAIP3/TREM2/AKIRIN2/CD36/ADAM9/LYN/RIPK2/ABCA1	50	Module 5
GO:0006909	phagocytosis	54/943	382/18866	4.50155e-12	5.75556e-10	4.44176e-10	FCER1G/FCGR2A/FCGR2B/PTPRC/VAV3/FCGR3A/NCF2/NR1H3/PTPRJ/RAB39A/CD3G/PAK1/NCKAP1L/P2RX7/BIN2/ARPC3/THBS1/CORO1A/ITGAL/IRF8/CD300A/PECAM1/COLEC12/VAV1/TYROBP/ARHGAP25/MERTK/MARCO/SLC11A1/IL1B/HCK/CD93/ITGB2/NCF4/RAC2/PPARG/CCR2/PIK3CB/ITGA2/F2RL1/DOCK2/HAVCR1/C2/TREM2/FYN/CD36/ELMO1/MYO1G/LYN/MSR1/SYK/ABCA1/IL2RG/RAB7B	54	Module 5
GO:0002429	immune response-activating cell surface receptor signaling pathway	62/943	481/18866	6.80545e-12	8.30574e-10	6.40982e-10	PDE4B/FCER1G/FCGR2A/FCGR2B/PTPRC/CR1/VAV3/PTPN22/NRAS/FCGR3A/DENND1B/PRKCQ/BLNK/PTPRJ/CD3E/CD3G/LPXN/PAK1/CD4/NCKAP1L/C3AR1/TESPA1/ARPC3/ELF1/LGALS3/PRKCH/CD300A/SKAP1/MALT1/CD226/VAV1/C5AR1/FPR3/FPR1/CD28/INPP5D/HCK/GRAP2/TRAT1/PAK2/GCSAM/PIK3CB/KLHL6/TXK/TEC/ITK/LCP2/BTN3A1/BTN3A3/HLA-DQB1/HLA-DPA1/TNFRSF21/FYN/THEMIS/ELMO1/MYO1G/LYN/RIPK2/PAG1/SYK/SH2D1A/BTK	62	Module 5
GO:0002757	immune response-activating signal transduction	62/943	481/18866	6.80545e-12	8.30574e-10	6.40982e-10	PDE4B/FCER1G/FCGR2A/FCGR2B/PTPRC/CR1/VAV3/PTPN22/NRAS/FCGR3A/DENND1B/PRKCQ/BLNK/PTPRJ/CD3E/CD3G/LPXN/PAK1/CD4/NCKAP1L/C3AR1/TESPA1/ARPC3/ELF1/LGALS3/PRKCH/CD300A/SKAP1/MALT1/CD226/VAV1/C5AR1/FPR3/FPR1/CD28/INPP5D/HCK/GRAP2/TRAT1/PAK2/GCSAM/PIK3CB/KLHL6/TXK/TEC/ITK/LCP2/BTN3A1/BTN3A3/HLA-DQB1/HLA-DPA1/TNFRSF21/FYN/THEMIS/ELMO1/MYO1G/LYN/RIPK2/PAG1/SYK/SH2D1A/BTK	62	Module 5
GO:0032611	interleukin-1 beta production	26/943	106/18866	9.09362e-12	1.08517e-09	8.37464e-10	PYHIN1/NLRP3/GBP5/AIM2/CASP1/P2RX7/IGF1/NOD2/TMEM106A/CCL3/MALT1/CD33/ACP5/TYROBP/CARD8/NLRC4/IL1B/TLR6/F2RL1/TNFAIP3/SERPINB1/TREM2/CD36/LPL/RIPK2/ABCA1	26	Module 5
GO:0071216	cellular response to biotic stimulus	41/943	246/18866	9.64192e-12	1.12559e-09	8.68655e-10	PDE4B/TXNIP/FCGR2B/KMO/NLRP3/PTPN22/MRC1/NR1H3/CASP1/IL18/EDNRB/NOD2/IRF8/CD68/SCIMP/CCL5/CCL3/MALT1/LILRB1/CARD8/LILRB2/BCL2L11/IL1B/HCK/CD86/CD80/TLR6/CXCL10/CXCL11/CD180/HAVCR2/TNFAIP3/TREM2/CD36/ADAM9/LYN/RIPK2/SYK/IGFBPL1/ABCA1/BTK	41	Module 5
GO:0050852	T cell receptor signaling pathway	37/943	206/18866	1.03523e-11	1.18281e-09	9.12815e-10	PDE4B/PTPRC/PTPN22/DENND1B/PRKCQ/PTPRJ/CD3E/CD3G/PAK1/CD4/TESPA1/ELF1/LGALS3/CD300A/SKAP1/MALT1/CD226/CD28/INPP5D/GRAP2/TRAT1/PAK2/PIK3CB/TXK/TEC/ITK/LCP2/BTN3A1/BTN3A3/HLA-DQB1/HLA-DPA1/TNFRSF21/FYN/THEMIS/RIPK2/PAG1/SH2D1A	37	Module 5
GO:1902107	positive regulation of leukocyte differentiation	32/943	159/18866	1.1577e-11	1.26534e-09	9.76504e-10	PTPRC/NLRP3/DUSP10/IL2RA/IL18/CD4/NCKAP1L/TESPA1/PNP/RASGRP1/EVI2B/MALT1/TYROBP/LILRB2/INPP5D/IL1B/CD86/CCR1/CD80/HCLS1/LEF1/IL7R/CD83/TREM2/VNN1/CA2/RIPK2/DCSTAMP/TOX/IL7/SYK/BTK	32	Module 5
GO:0070665	positive regulation of leukocyte proliferation	31/943	150/18866	1.17815e-11	1.26534e-09	9.76504e-10	XCL1/PTPRC/VAV3/PTPN22/IL2RA/PRKCQ/CD3E/IL18/CD4/NCKAP1L/IGF1/PNP/CORO1A/CCL5/BST2/LILRB2/CD28/PELI1/IL1B/CCR2/CD86/CD80/TFRC/CSF1R/HAVCR2/HLA-DMB/HLA-DPA1/LYN/RIPK2/IL7/SYK	31	Module 5
GO:0097530	granulocyte migration	31/943	150/18866	1.17815e-11	1.26534e-09	9.76504e-10	PDE4B/SLAMF8/FCER1G/XCL1/VAV3/JAML/NCKAP1L/C3AR1/LGALS3/THBS1/CCL8/CCL18/CD300A/CCL5/CCL3/PECAM1/VAV1/C5AR1/ADGRE2/IL1B/DPP4/CXADR/ITGB2/RAC2/CXCL10/CXCL11/PTGER4/CSF1R/PIK3CG/SYK/MPP1	31	Module 5
GO:0050851	antigen receptor-mediated signaling pathway	48/943	325/18866	1.47841e-11	1.55668e-09	1.20134e-09	PDE4B/FCGR2B/PTPRC/VAV3/PTPN22/DENND1B/PRKCQ/BLNK/PTPRJ/CD3E/CD3G/LPXN/PAK1/CD4/NCKAP1L/TESPA1/ELF1/LGALS3/PRKCH/CD300A/SKAP1/MALT1/CD226/CD28/INPP5D/GRAP2/TRAT1/PAK2/GCSAM/PIK3CB/KLHL6/TXK/TEC/ITK/LCP2/BTN3A1/BTN3A3/HLA-DQB1/HLA-DPA1/TNFRSF21/FYN/THEMIS/LYN/RIPK2/PAG1/SYK/SH2D1A/BTK	48	Module 5
GO:0042102	positive regulation of T cell proliferation	25/943	101/18866	1.83913e-11	1.89926e-09	1.46572e-09	XCL1/PTPRC/PTPN22/IL2RA/PRKCQ/CD3E/IL18/CD4/NCKAP1L/IGF1/PNP/CORO1A/CCL5/LILRB2/CD28/IL1B/CCR2/CD86/CD80/TFRC/HAVCR2/HLA-DMB/HLA-DPA1/RIPK2/SYK	25	Module 5
GO:0045088	regulation of innate immune response	46/943	307/18866	2.38867e-11	2.42022e-09	1.86776e-09	PYHIN1/SLAMF8/FCER1G/FCGR2B/CR1/GBP5/PTPN22/NRAS/AIM2/SLAMF6/DUSP10/NR1H3/BIRC3/CRTAM/PAK1/MMP12/CADM1/RASGRP1/CCL5/MALT1/CD226/VAV1/LILRB1/IL18RAP/NLRC4/NMI/STAT1/HCK/SAMHD1/IFNAR2/IFNGR2/PPARG/CD96/PAK2/TXK/IRF1/HAVCR2/TNFAIP3/SERPINB9/TREM2/FYN/IFNGR1/LYN/SYK/SH2D1A/VSIG4	46	Module 5
GO:0032623	interleukin-2 production	18/943	54/18866	5.68745e-11	5.65585e-09	4.36481e-09	PDE4B/FCER1G/XCL1/PTPRC/CD4/PNP/MALT1/CD28/SLC11A1/IL1B/CCR2/CD86/CD80/HAVCR2/CD83/TNFAIP3/RIPK2/VSIG4	18	Module 5
GO:0032609	interferon-gamma production	26/943	115/18866	6.53785e-11	6.38332e-09	4.92622e-09	PDE4B/IL12RB2/CD2/XCL1/PTPN22/SLAMF6/CD244/CD3E/CRTAM/IL18/RASGRP1/IRF8/CD226/LILRB1/IL18RAP/SLC11A1/IL1B/CCR2/CD96/TXK/F2RL1/ITK/HAVCR2/BTN3A1/HLA-DPA1/RIPK2	26	Module 5
GO:0071621	granulocyte chemotaxis	27/943	127/18866	1.26434e-10	1.2033e-08	9.28628e-09	PDE4B/FCER1G/XCL1/VAV3/JAML/NCKAP1L/C3AR1/LGALS3/THBS1/CCL8/CCL18/CCL5/CCL3/VAV1/C5AR1/ADGRE2/IL1B/DPP4/CXADR/ITGB2/RAC2/CXCL10/CXCL11/CSF1R/PIK3CG/SYK/MPP1	27	Module 5
GO:0050671	positive regulation of lymphocyte proliferation	28/943	136/18866	1.27725e-10	1.2033e-08	9.28628e-09	XCL1/PTPRC/VAV3/PTPN22/IL2RA/PRKCQ/CD3E/IL18/CD4/NCKAP1L/IGF1/PNP/CORO1A/CCL5/LILRB2/CD28/PELI1/IL1B/CCR2/CD86/CD80/TFRC/HAVCR2/HLA-DMB/HLA-DPA1/RIPK2/IL7/SYK	28	Module 5
GO:1903708	positive regulation of hemopoiesis	35/943	204/18866	1.40388e-10	1.2998e-08	1.0031e-08	PTPRC/NLRP3/DUSP10/IL2RA/IL18/CD4/NCKAP1L/TESPA1/PNP/HIF1A/RASGRP1/EVI2B/MALT1/TYROBP/LILRB2/INPP5D/IL1B/STAT1/CD86/CCR1/CD80/HCLS1/LEF1/IL7R/CD83/TREM2/VNN1/CA2/RIPK2/DCSTAMP/TOX/IL7/SYK/BTK/RAB7B	35	Module 5
GO:0032946	positive regulation of mononuclear cell proliferation	28/943	137/18866	1.53022e-10	1.39276e-08	1.07484e-08	XCL1/PTPRC/VAV3/PTPN22/IL2RA/PRKCQ/CD3E/IL18/CD4/NCKAP1L/IGF1/PNP/CORO1A/CCL5/LILRB2/CD28/PELI1/IL1B/CCR2/CD86/CD80/TFRC/HAVCR2/HLA-DMB/HLA-DPA1/RIPK2/IL7/SYK	28	Module 5
GO:0030593	neutrophil chemotaxis	24/943	103/18866	1.81402e-10	1.62355e-08	1.25294e-08	PDE4B/FCER1G/XCL1/VAV3/JAML/NCKAP1L/C3AR1/LGALS3/CCL8/CCL18/CCL5/CCL3/VAV1/C5AR1/IL1B/DPP4/CXADR/ITGB2/RAC2/CXCL10/CXCL11/PIK3CG/SYK/MPP1	24	Module 5
GO:0032729	positive regulation of interferon-gamma production	19/943	65/18866	2.19828e-10	1.93521e-08	1.49347e-08	PDE4B/IL12RB2/CD2/PTPN22/SLAMF6/CD244/CD3E/CRTAM/IL18/RASGRP1/IRF8/CD226/SLC11A1/IL1B/CCR2/TXK/HAVCR2/HLA-DPA1/RIPK2	19	Module 5
GO:1990266	neutrophil migration	26/943	122/18866	2.62796e-10	2.27615e-08	1.75658e-08	PDE4B/SLAMF8/FCER1G/XCL1/VAV3/JAML/NCKAP1L/C3AR1/LGALS3/CCL8/CCL18/CCL5/CCL3/PECAM1/VAV1/C5AR1/IL1B/DPP4/CXADR/ITGB2/RAC2/CXCL10/CXCL11/PIK3CG/SYK/MPP1	26	Module 5
GO:0050727	regulation of inflammatory response	54/943	425/18866	2.74998e-10	2.33115e-08	1.79902e-08	SLAMF8/FCER1G/FCGR2B/XCL1/PTPRC/NLRP3/GBP5/DUSP10/ALOX5/IL2RA/PIK3AP1/NR1H3/BIRC3/CTSC/MMP8/CASP4/CASP5/CASP1/IL18/LPCAT3/IGF1/LACC1/EDNRB/AREL1/IL16/NOD2/NUPR1/CCL5/CCL3/MIR142/ACP5/CD28/IL1B/HCK/MMP9/FANCD2/PPARG/CCR2/AGTR1/CD200R1/TLR6/SNCA/PTGER4/ITGA2/MAPK13/TNFAIP3/TREM2/PLA2G7/PIK3CG/AOAH/LPL/LYN/PBK/BTK	54	Module 5
GO:0045621	positive regulation of lymphocyte differentiation	24/943	105/18866	2.77827e-10	2.33115e-08	1.79902e-08	PTPRC/NLRP3/DUSP10/IL2RA/IL18/NCKAP1L/TESPA1/PNP/RASGRP1/MALT1/LILRB2/INPP5D/IL1B/CD86/CD80/LEF1/IL7R/CD83/VNN1/RIPK2/TOX/IL7/SYK/BTK	24	Module 5
GO:0071219	cellular response to molecule of bacterial origin	36/943	222/18866	3.91058e-10	3.23074e-08	2.49327e-08	PDE4B/FCGR2B/KMO/NLRP3/PTPN22/MRC1/NR1H3/CASP1/IL18/EDNRB/NOD2/IRF8/CD68/SCIMP/CCL5/CCL3/MALT1/LILRB1/CARD8/LILRB2/IL1B/HCK/CD86/CD80/TLR6/CXCL10/CXCL11/CD180/HAVCR2/TNFAIP3/TREM2/CD36/ADAM9/LYN/RIPK2/ABCA1	36	Module 5
GO:0002685	regulation of leukocyte migration	35/943	212/18866	4.15899e-10	3.3839e-08	2.61147e-08	SLAMF8/XCL1/NCKAP1L/P2RX4/C3AR1/LGALS3/LGMN/THBS1/ADAM10/CCL8/CD300A/CCL5/CCL3/C5AR1/ITGA4/ADAM17/DPP4/RAC2/CCR2/CCR1/GCSAM/CD200R1/CXCL10/VEGFC/PTGER4/ITGA2/F2RL1/CSF1R/VEGFA/ADTRP/TREM2/PLA2G7/LYN/DOCK8/MPP1	35	Module 5
GO:0042116	macrophage activation	23/943	101/18866	7.06038e-10	5.65884e-08	4.36712e-08	C1QA/FCGR2B/PTPRC/GPR137B/NR1H3/CTSC/MMP8/THBS1/TMEM106A/CCL3/MIR142/C5AR1/TYROBP/SLC11A1/CD93/ITGB2/TLR6/SNCA/HAVCR2/TREM2/IFNGR1/SYK/VSIG4	23	Module 5
GO:0033627	cell adhesion mediated by integrin	19/943	71/18866	1.16303e-09	9.1845e-08	7.08799e-08	PLAU/CD3E/LPXN/NCKAP1L/ITGB7/CCL5/SKAP1/ITGA4/ADAM17/CYP1B1/DPP4/ITGB2/SFRP2/ITGA2/ITGB8/PIK3CG/ADAM9/LYN/SYK	19	Module 5
GO:0031349	positive regulation of defense response	49/943	385/18866	1.7639e-09	1.37278e-07	1.05942e-07	PYHIN1/FCER1G/GBP5/NRAS/AIM2/SLAMF6/CRTAM/PAK1/CTSC/MMP8/MMP12/IL18/CADM1/IL16/RASGRP1/NOD2/NUPR1/CCL5/CCL3/MIR142/MALT1/CD226/VAV1/IL18RAP/CD28/NLRC4/IL1B/HCK/CCR2/AGTR1/PAK2/TLR6/TXK/SNCA/PTGER4/ITGA2/F2RL1/HAVCR2/MAPK13/TREM2/PLA2G7/FYN/PIK3CG/LPL/LYN/RIPK2/SYK/SH2D1A/BTK	49	Module 5
GO:0046634	regulation of alpha-beta T cell activation	22/943	97/18866	1.79379e-09	1.37609e-07	1.06198e-07	XCL1/PTPRC/NLRP3/PTPN22/PRKCQ/CD3E/CRTAM/IL18/NCKAP1L/PNP/CD300A/MALT1/LILRB1/CD28/CCR2/CD86/CD80/IRF1/CD83/PRDM1/RIPK2/SYK	22	Module 5
GO:0002449	lymphocyte mediated immunity	47/943	366/18866	2.83863e-09	2.12996e-07	1.64376e-07	C1QA/C1QC/C1QB/SLAMF7/FCER1G/FCGR2B/XCL1/PTPRC/CR1/EXO1/NLRP3/SLAMF6/DENND1B/CRTAM/CTSC/IL18/CADM1/KLRD1/P2RX7/RASGRP1/CTSH/CORO1A/MALT1/CD226/VAV1/LILRB1/IL18RAP/CD28/SLC11A1/INPP5D/CD8A/IL1B/CCR2/CD96/TFRC/CFI/IL7R/C7/GAPT/HAVCR2/BTN3A3/C2/SERPINB9/HLA-DQB1/MYO1G/SH2D1A/BTK	47	Module 5
GO:0001909	leukocyte mediated cytotoxicity	23/943	108/18866	2.85581e-09	2.12996e-07	1.64376e-07	SLAMF7/FCGR2B/XCL1/PTPRC/SLAMF6/CRTAM/CTSC/IL18/CADM1/P2RX7/RASGRP1/CTSH/CORO1A/CD226/VAV1/LILRB1/TYROBP/IL18RAP/IL7R/F2RL1/HAVCR2/SERPINB9/SH2D1A	23	Module 5
GO:0045582	positive regulation of T cell differentiation	21/943	92/18866	3.69944e-09	2.69245e-07	2.07786e-07	PTPRC/NLRP3/DUSP10/IL2RA/IL18/NCKAP1L/TESPA1/PNP/RASGRP1/MALT1/LILRB2/IL1B/CD86/CD80/LEF1/IL7R/CD83/VNN1/RIPK2/IL7/SYK	21	Module 5
GO:0071222	cellular response to lipopolysaccharide	33/943	208/18866	3.71027e-09	2.69245e-07	2.07786e-07	PDE4B/KMO/NLRP3/PTPN22/MRC1/NR1H3/CASP1/IL18/EDNRB/NOD2/IRF8/CD68/SCIMP/CCL5/CCL3/MALT1/LILRB1/CARD8/LILRB2/IL1B/HCK/CD86/CD80/CXCL10/CXCL11/CD180/HAVCR2/TNFAIP3/CD36/ADAM9/LYN/RIPK2/ABCA1	33	Module 5
GO:0002460	adaptive immune response based on somatic recombination of immune receptors built from immunoglobulin superfamily domains	47/943	370/18866	4.04237e-09	2.89434e-07	2.23366e-07	C1QA/C1QC/C1QB/FCER1G/FCGR2B/XCL1/PTPRC/CR1/EXO1/NLRP3/SLAMF6/DENND1B/PRKCQ/CTSC/IL18/CD4/P2RX7/CTSH/TMEM98/MALT1/CD226/LILRB1/IL18RAP/CD28/SLC11A1/INPP5D/ADAM17/CD8A/IL1B/CCR2/CD80/KLHL6/TFRC/LEF1/CFI/IL7R/C7/GAPT/HAVCR2/BTN3A3/C2/TNFAIP3/HLA-DQB1/BACH2/MYO1G/RIPK2/BTK	47	Module 5
GO:0002819	regulation of adaptive immune response	29/943	168/18866	4.59318e-09	3.24544e-07	2.50462e-07	FCER1G/FCGR2B/XCL1/PTPRC/CR1/NLRP3/CD48/DUSP10/PRKCQ/IL18/CD4/P2RX7/SKAP1/MALT1/CD226/LILRB1/CD28/SLC11A1/IL1B/SAMSN1/CCR2/CD80/TFRC/IL7R/IRF1/HAVCR2/TNFAIP3/RIPK2/BTK	29	Module 5
GO:0002573	myeloid leukocyte differentiation	33/943	210/18866	4.74897e-09	3.31194e-07	2.55594e-07	C1QC/FCER1G/GPR137B/UBASH3B/CD4/ANXA2/EVI2B/CCL3/LILRB1/TYROBP/TMEM178A/INPP5D/MMP9/RASSF2/MAFB/PPARG/MITF/CCR1/HCLS1/TFRC/LEF1/F2RL1/CAMK4/CSF1R/VEGFA/CD109/TREM2/SNX10/LYN/CA2/DCSTAMP/MYC/GAB3	33	Module 5
GO:0150076	neuroinflammatory response	19/943	77/18866	5.12449e-09	3.52801e-07	2.72269e-07	C1QA/PTPRC/CTSC/MMP8/IL18/IGF1/NUPR1/CCL3/MIR142/C5AR1/TYROBP/IL1B/MMP9/ITGB2/CD200R1/TLR6/SNCA/TREM2/IFNGR1	19	Module 5
GO:0018108	peptidyl-tyrosine phosphorylation	47/943	374/18866	5.72054e-09	3.88852e-07	3.0009e-07	IL12RB2/PTPRC/NRP1/PTPRJ/CD3E/CBL/IL18/DYRK4/CD4/TWF1/IGF1/FLT1/SNX6/MAP2K6/CD300A/CCL5/PECAM1/MERTK/ADAM17/HCK/CASS4/SAMSN1/ITGB2/DOCK3/RAP2B/PAK2/CD80/HCLS1/TXK/TEC/SFRP2/ITK/CSF1R/VEGFA/TTK/TREM2/FYN/CD36/NCAPG2/LYN/RIPK2/ADRA1A/IL7/SLA/MELK/SYK/BTK	47	Module 5
GO:0070664	negative regulation of leukocyte proliferation	20/943	86/18866	6.15631e-09	4.13242e-07	3.18913e-07	FCGR2B/XCL1/IL2RA/CRTAM/CCL8/CD300A/LILRB1/TYROBP/LILRB2/INPP5D/PELI1/CD86/CD80/HAVCR2/TNFAIP3/TNFRSF21/GPNMB/LYN/VSIG4/BTK	20	Module 5
GO:0032649	regulation of interferon-gamma production	22/943	104/18866	7.18024e-09	4.76023e-07	3.67363e-07	PDE4B/IL12RB2/CD2/XCL1/PTPN22/SLAMF6/CD244/CD3E/CRTAM/IL18/RASGRP1/IRF8/CD226/LILRB1/SLC11A1/IL1B/CCR2/CD96/TXK/HAVCR2/HLA-DPA1/RIPK2	22	Module 5
GO:0018212	peptidyl-tyrosine modification	47/943	377/18866	7.39241e-09	4.84112e-07	3.73606e-07	IL12RB2/PTPRC/NRP1/PTPRJ/CD3E/CBL/IL18/DYRK4/CD4/TWF1/IGF1/FLT1/SNX6/MAP2K6/CD300A/CCL5/PECAM1/MERTK/ADAM17/HCK/CASS4/SAMSN1/ITGB2/DOCK3/RAP2B/PAK2/CD80/HCLS1/TXK/TEC/SFRP2/ITK/CSF1R/VEGFA/TTK/TREM2/FYN/CD36/NCAPG2/LYN/RIPK2/ADRA1A/IL7/SLA/MELK/SYK/BTK	47	Module 5
GO:0046635	positive regulation of alpha-beta T cell activation	17/943	63/18866	7.57193e-09	4.89895e-07	3.78068e-07	XCL1/PTPRC/NLRP3/PTPN22/PRKCQ/CD3E/IL18/NCKAP1L/PNP/MALT1/CD28/CCR2/CD86/CD80/CD83/RIPK2/SYK	17	Module 5
GO:0002687	positive regulation of leukocyte migration	26/943	142/18866	8.0522e-09	5.14766e-07	3.97262e-07	XCL1/NCKAP1L/P2RX4/C3AR1/LGALS3/LGMN/THBS1/ADAM10/CCL8/CCL5/CCL3/C5AR1/ITGA4/ADAM17/RAC2/CCR2/CCR1/CXCL10/VEGFC/ITGA2/F2RL1/CSF1R/VEGFA/TREM2/PLA2G7/DOCK8	26	Module 5
GO:0002224	toll-like receptor signaling pathway	27/943	152/18866	8.24184e-09	5.2069e-07	4.01834e-07	PTPN22/CTSS/CTSK/TLR5/PIK3AP1/NR1H3/BIRC3/LGMN/CD300A/SCIMP/COLEC12/TANK/PELI1/ITGB2/TLR6/MAP3K1/F2RL1/IRF1/HAVCR2/TNFAIP3/CD36/LYN/RIPK2/CTSB/CTSL/BTK/RAB7B	27	Module 5
GO:0032663	regulation of interleukin-2 production	15/943	49/18866	8.66588e-09	5.41114e-07	4.17596e-07	PDE4B/XCL1/PTPRC/CD4/MALT1/CD28/IL1B/CCR2/CD86/CD80/HAVCR2/CD83/TNFAIP3/RIPK2/VSIG4	15	Module 5
GO:0045453	bone resorption	17/943	64/18866	9.83493e-09	6.07052e-07	4.68483e-07	GPR137B/CTSK/UBASH3B/TPP1/P2RX7/ACP5/INPP5D/RAC2/TFRC/SPP1/CSF1R/TNFAIP3/SNX10/CA2/DCSTAMP/IL7/SYK	17	Module 5
GO:1901136	carbohydrate derivative catabolic process	31/943	195/18866	1.04631e-08	6.38487e-07	4.92742e-07	PDE4B/NPL/CHI3L1/CHIT1/PSAP/AMPD3/MMP12/GNS/PNP/CEMIP/PDE8A/HEXA/NAGK/SAMHD1/APOBEC3D/APOBEC3F/APOBEC3G/GLB1/ADAMTS9/HPSE/MANBA/HEXB/GM2A/HMMR/ARSB/AOAH/GUSB/PDE7A/CTSL/NUDT10/GLA	31	Module 5
GO:0050921	positive regulation of chemotaxis	26/943	144/18866	1.09147e-08	6.58011e-07	5.07809e-07	XCL1/NRP1/NCKAP1L/P2RX4/C3AR1/LGMN/THBS1/IL16/ADAM10/CCL5/CCL3/C5AR1/ADAM17/CXCR4/TIAM1/RAC2/CCR2/CCR1/CXCL10/VEGFC/ITGA2/F2RL1/CSF1R/VEGFA/TREM2/PLA2G7	26	Module 5
GO:0002706	regulation of lymphocyte mediated immunity	27/943	154/18866	1.10281e-08	6.58011e-07	5.07809e-07	FCER1G/FCGR2B/XCL1/PTPRC/CR1/NLRP3/SLAMF6/CRTAM/IL18/CADM1/P2RX7/RASGRP1/MALT1/CD226/VAV1/LILRB1/IL18RAP/CD28/IL1B/CCR2/CD96/TFRC/IL7R/HAVCR2/SERPINB9/SH2D1A/BTK	27	Module 5
GO:0030316	osteoclast differentiation	21/943	98/18866	1.23453e-08	7.28507e-07	5.62213e-07	FCER1G/GPR137B/UBASH3B/ANXA2/CCL3/LILRB1/TYROBP/TMEM178A/INPP5D/RASSF2/MAFB/MITF/CCR1/TFRC/CAMK4/CSF1R/CD109/TREM2/SNX10/CA2/DCSTAMP	21	Module 5
GO:0071887	leukocyte apoptotic process	22/943	108/18866	1.49768e-08	8.74192e-07	6.74643e-07	FCER1G/IL2RA/PRKCQ/CD3G/P2RX7/LGALS3/HIF1A/NOD2/CCL5/LILRB1/BCL2L11/MERTK/ADAM17/HCLS1/PIK3CB/IL7R/TNFRSF21/GIMAP8/LYN/DOCK8/CTSL/BTK	22	Module 5
GO:0032743	positive regulation of interleukin-2 production	11/943	26/18866	1.77631e-08	1.02568e-06	7.91551e-07	PDE4B/PTPRC/CD4/MALT1/CD28/IL1B/CCR2/CD86/CD80/CD83/RIPK2	11	Module 5
GO:0002705	positive regulation of leukocyte mediated immunity	25/943	138/18866	1.94453e-08	1.11087e-06	8.57294e-07	FCER1G/XCL1/PTPRC/NLRP3/SLAMF6/CRTAM/IL18/CADM1/P2RX7/RASGRP1/NOD2/SCIMP/MALT1/CD226/VAV1/TYROBP/IL18RAP/CD28/IL1B/ITGB2/TFRC/F2RL1/SYK/SH2D1A/BTK	25	Module 5
GO:0001910	regulation of leukocyte mediated cytotoxicity	18/943	75/18866	2.07425e-08	1.1725e-06	9.04857e-07	FCGR2B/XCL1/PTPRC/SLAMF6/CRTAM/CADM1/P2RX7/RASGRP1/CD226/VAV1/LILRB1/TYROBP/IL18RAP/IL7R/F2RL1/HAVCR2/SERPINB9/SH2D1A	18	Module 5
GO:0031341	regulation of cell killing	20/943	92/18866	2.11292e-08	1.18192e-06	9.12125e-07	FCGR2B/XCL1/PTPRC/SLAMF6/CRTAM/CADM1/P2RX7/RASGRP1/CD226/VAV1/LILRB1/TYROBP/IL18RAP/BCL2L11/IL7R/F2RL1/HAVCR2/SERPINB9/SYK/SH2D1A	20	Module 5
GO:0002221	pattern recognition receptor signaling pathway	31/943	201/18866	2.17392e-08	1.2035e-06	9.28782e-07	PTPN22/CTSS/CTSK/TLR5/PIK3AP1/NR1H3/BIRC3/LACC1/LGMN/NOD2/MAP2K6/CD300A/SCIMP/RNF125/COLEC12/TANK/PELI1/ITGB2/TLR6/MAP3K1/F2RL1/IRF1/HAVCR2/TNFAIP3/CD36/LYN/RIPK2/CTSB/CTSL/BTK/RAB7B	31	Module 5
GO:0050777	negative regulation of immune response	27/943	159/18866	2.23069e-08	1.22233e-06	9.43313e-07	SLAMF8/FCGR2B/XCL1/PTPRC/CR1/CD84/DUSP10/IL2RA/NR1H3/MMP12/LGALS3/CD300A/LILRB1/BST2/INPP5D/NMI/SAMHD1/SAMSN1/PPARG/CCR2/CD96/IL7R/HAVCR2/TNFAIP3/SERPINB9/LYN/VSIG4	27	Module 5
GO:0055074	calcium ion homeostasis	53/943	468/18866	2.30473e-08	1.25014e-06	9.64778e-07	CD52/XCL1/PTPRC/BNIP3/UBASH3B/TRPC6/CD4/P2RX7/P2RX4/C3AR1/ITPR2/ATP2B1/LPAR6/EDNRB/PTGDR/SLC24A4/ERO1A/CEMIP/MYO5A/CORO1A/CCL8/CCL5/CCL3/FAM20A/C5AR1/FPR3/FPR1/TMEM178A/CXCR4/CXCR6/CCR2/AGTR1/CCR1/RAP1GDS1/CXCL10/CXCL11/SNCA/PTGER4/HEXB/F2RL1/FYN/SNX10/CD36/PIK3CG/TRIM24/LYN/CHD7/ADRA1A/JPH1/XK/LPAR4/P2RY10/GPR174	53	Module 5
GO:0032635	interleukin-6 production	28/943	170/18866	2.44291e-08	1.30146e-06	1.00438e-06	FCER1G/PTPN22/MMP8/IL18/NCKAP1L/P2RX7/IL16/NOD2/TMEM106A/SCIMP/TYROBP/LILRB2/IL18RAP/IL1B/CD200R1/TLR6/F2RL1/HAVCR2/MAPK13/TNFAIP3/TREM2/AKIRIN2/CD36/TWIST1/LPL/RIPK2/SYK/RAB7B	28	Module 5
GO:0034341	response to interferon-gamma	31/943	202/18866	2.44782e-08	1.30146e-06	1.00438e-06	XCL1/GBP4/GBP5/MRC1/IFITM1/NR1H3/CASP1/IRF8/CCL8/CCL18/CXCL16/CCL5/CCL3/TRIM25/IFI30/BST2/SLC11A1/NMI/STAT1/HCK/IFNGR2/PPARG/CLDN1/TXK/SNCA/IRF1/HLA-DQB1/HLA-DPA1/IFNGR1/DAPK1/RAB7B	31	Module 5
GO:0032652	regulation of interleukin-1 production	22/943	111/18866	2.53588e-08	1.33507e-06	1.03032e-06	PYHIN1/NLRP3/AIM2/CASP1/P2RX7/IGF1/IL16/NOD2/CCL3/MIR142/MALT1/CD33/ACP5/TYROBP/CARD8/NLRC4/HAVCR2/TNFAIP3/SERPINB1/TREM2/LPL/RIPK2	22	Module 5
GO:0030099	myeloid cell differentiation	50/943	431/18866	2.66817e-08	1.39108e-06	1.07354e-06	C1QC/FCER1G/GPR137B/PABPC4/PRKCQ/UBASH3B/FLI1/CD4/NCKAP1L/SLC11A2/LGALS3/HIF1A/THBS1/ANXA2/IRF8/EVI2B/CCL3/LILRB1/TYROBP/TMEM178A/INPP5D/STAT1/MMP9/RASSF2/MAFB/PPARG/SLC25A38/MITF/CCR1/HCLS1/GPR171/TFRC/LEF1/F2RL1/CAMK4/CSF1R/VEGFA/CD109/TREM2/SNX10/IKZF1/NCAPG2/LYN/CA2/DCSTAMP/MYC/PTBP3/PRKX/GAB3/RAB7B	50	Module 5
GO:0032147	activation of protein kinase activity	42/943	331/18866	2.80616e-08	1.44895e-06	1.1182e-06	PTPRC/CLSPN/KIF14/CHI3L1/MAP3K8/CDK1/PAK1/IL18/NCKAP1L/P2RX7/OSBPL8/DUSP6/IGF1/TAOK3/THBS1/NOD2/MLKL/MAP2K6/CD300A/CCL5/MALT1/C5AR1/FPR1/SLC11A1/CCDC88A/IL1B/CXCR4/TPX2/STK4/CD86/ECT2/PAK2/PIK3CB/TLR6/MAP3K1/VEGFA/ADAM9/RIPK2/TNFRSF10A/PBK/SYK/TNFSF15	42	Module 5
GO:0007204	positive regulation of cytosolic calcium ion concentration	41/943	322/18866	3.71937e-08	1.89728e-06	1.4642e-06	CD52/XCL1/PTPRC/UBASH3B/TRPC6/CD4/P2RX7/P2RX4/C3AR1/ITPR2/LPAR6/EDNRB/PTGDR/ERO1A/CEMIP/MYO5A/CORO1A/CCL3/C5AR1/FPR3/FPR1/CXCR4/CXCR6/CCR2/AGTR1/CCR1/CXCL10/CXCL11/SNCA/PTGER4/F2RL1/FYN/CD36/PIK3CG/LYN/CHD7/ADRA1A/JPH1/LPAR4/P2RY10/GPR174	41	Module 5
GO:0042493	response to drug	47/943	397/18866	3.75509e-08	1.89728e-06	1.4642e-06	PDE4B/TXNIP/SLAMF8/CENPF/VAV3/AIM2/CDK1/CDKN1B/NCKAP1L/P2RX7/CD69/DUSP6/PARP4/ABCC4/PNP/THBS1/ADAM10/MAP2K6/GATA6/NPC1/GAD1/ADAM17/RNF149/IL1B/CXCR4/STAT1/CHEK2/PPARG/TFRC/SFRP2/VEGFC/ACSL1/SLC1A3/ITGA2/CCNB1/FYN/ABCB1/SLC26A5/LPL/ADAM9/LYN/MYC/ADRA1A/PLIN2/FBP1/ABCA1/CYBB	47	Module 5
GO:0002695	negative regulation of leukocyte activation	29/943	184/18866	3.78043e-08	1.89728e-06	1.4642e-06	FCGR2B/XCL1/PTPRC/PTPN22/CD84/IL2RA/NR1H3/CRTAM/LGALS3/CD300A/LILRB1/TYROBP/LILRB2/MERTK/INPP5D/PELI1/SAMSN1/CCR2/CD86/CD80/IRF1/HAVCR2/TNFAIP3/TNFRSF21/GPNMB/LYN/PAG1/VSIG4/BTK	29	Module 5
GO:0002688	regulation of leukocyte chemotaxis	23/943	124/18866	4.52524e-08	2.25005e-06	1.73644e-06	SLAMF8/XCL1/NCKAP1L/C3AR1/LGMN/THBS1/ADAM10/CCL5/CCL3/C5AR1/ADAM17/DPP4/RAC2/CCR2/CCR1/CXCL10/VEGFC/F2RL1/CSF1R/VEGFA/PLA2G7/LYN/MPP1	23	Module 5
GO:0050672	negative regulation of lymphocyte proliferation	18/943	79/18866	4.94246e-08	2.43496e-06	1.87914e-06	FCGR2B/XCL1/IL2RA/CRTAM/CD300A/LILRB1/TYROBP/LILRB2/INPP5D/PELI1/CD86/CD80/HAVCR2/TNFRSF21/GPNMB/LYN/VSIG4/BTK	18	Module 5
GO:0046632	alpha-beta T cell differentiation	21/943	106/18866	5.28845e-08	2.58173e-06	1.99241e-06	NLRP3/SLAMF6/PSAP/IL18/NCKAP1L/PNP/TMEM98/MALT1/CD86/CD80/LEF1/PTGER4/ITK/IRF1/CD83/PRDM1/RIPK2/TOX/CTSL/SYK/TNFSF8	21	Module 5
GO:0032755	positive regulation of interleukin-6 production	19/943	88/18866	5.3382e-08	2.58254e-06	1.99303e-06	FCER1G/MMP8/P2RX7/IL16/NOD2/SCIMP/TYROBP/LILRB2/IL1B/TLR6/F2RL1/MAPK13/AKIRIN2/CD36/TWIST1/LPL/RIPK2/SYK/RAB7B	19	Module 5
GO:0071674	mononuclear cell migration	20/943	97/18866	5.43565e-08	2.58761e-06	1.99695e-06	SLAMF8/XCL1/JAML/C3AR1/FLT1/LGALS3/LGMN/THBS1/CCL8/CCL18/CCL5/CCL3/PECAM1/C5AR1/CCR2/CCR1/CXCL10/CSF1R/PLA2G7/LYN	20	Module 5
GO:0002285	lymphocyte activation involved in immune response	29/943	187/18866	5.44507e-08	2.58761e-06	1.99695e-06	FCER1G/FCGR2B/PTPRC/EXO1/NLRP3/SLAMF6/CD244/APBB1IP/IL18/LCP1/LGALS3/CORO1A/ITGAL/TMEM98/MALT1/LILRB1/CD28/SLC11A1/CD86/CD80/TFRC/LEF1/PTGER4/GAPT/F2RL1/CD180/HAVCR2/HLA-DMB/RIPK2	29	Module 5
GO:0032945	negative regulation of mononuclear cell proliferation	18/943	80/18866	6.08279e-08	2.86531e-06	2.21126e-06	FCGR2B/XCL1/IL2RA/CRTAM/CD300A/LILRB1/TYROBP/LILRB2/INPP5D/PELI1/CD86/CD80/HAVCR2/TNFRSF21/GPNMB/LYN/VSIG4/BTK	18	Module 5
GO:0051480	regulation of cytosolic calcium ion concentration	43/943	357/18866	8.74125e-08	4.06124e-06	3.1342e-06	CD52/XCL1/PTPRC/UBASH3B/TRPC6/CD4/P2RX7/P2RX4/C3AR1/ITPR2/ATP2B1/LPAR6/EDNRB/PTGDR/ERO1A/CEMIP/MYO5A/CORO1A/CCL3/C5AR1/FPR3/FPR1/TMEM178A/CXCR4/CXCR6/CCR2/AGTR1/CCR1/CXCL10/CXCL11/SNCA/PTGER4/F2RL1/FYN/CD36/PIK3CG/LYN/CHD7/ADRA1A/JPH1/LPAR4/P2RY10/GPR174	43	Module 5
GO:0002286	T cell activation involved in immune response	21/943	109/18866	8.77289e-08	4.06124e-06	3.1342e-06	FCER1G/FCGR2B/NLRP3/SLAMF6/APBB1IP/IL18/LCP1/LGALS3/ITGAL/TMEM98/MALT1/LILRB1/SLC11A1/CD86/CD80/LEF1/PTGER4/F2RL1/HAVCR2/HLA-DMB/RIPK2	21	Module 5
GO:0071402	cellular response to lipoprotein particle stimulus	12/943	36/18866	9.32467e-08	4.27979e-06	3.30285e-06	FCER1G/CD68/NPC1/ADAM17/ITGB2/PPARG/TLR6/ADTRP/CD36/LPL/SYK/ABCA1	12	Module 5
GO:0046849	bone remodeling	19/943	91/18866	9.43315e-08	4.29288e-06	3.31296e-06	GPR137B/CTSK/UBASH3B/TPP1/P2RX7/ACP5/INPP5D/RASSF2/RAC2/MITF/TFRC/SPP1/CSF1R/TNFAIP3/SNX10/CA2/DCSTAMP/IL7/SYK	19	Module 5
GO:0002228	natural killer cell mediated immunity	16/943	66/18866	1.08406e-07	4.89195e-06	3.77528e-06	SLAMF7/SLAMF6/CRTAM/IL18/CADM1/KLRD1/RASGRP1/CORO1A/CD226/VAV1/LILRB1/IL18RAP/CD96/HAVCR2/SERPINB9/SH2D1A	16	Module 5
GO:0046629	gamma-delta T cell activation	9/943	19/18866	1.10053e-07	4.92488e-06	3.8007e-06	PTPRC/JAML/NCKAP1L/NOD2/LILRB1/CXADR/LEF1/ITK/SYK	9	Module 5
GO:0007599	hemostasis	42/943	348/18866	1.1668e-07	5.17829e-06	3.99626e-06	FCER1G/PABPC4/VAV3/PLAU/PAPSS2/PRKCQ/UBASH3B/FLI1/PRCP/TRPC6/P2RX7/P2RX4/ITPR2/F10/GNG2/PRKCH/SERPINA1/THBS1/ANXA2/GATA6/VAV1/PLAUR/PLEK/MERTK/RAP2B/PIK3CB/TXK/TEC/HPSE/ITGA2/F2RL1/IRF1/LCP2/F13A1/ADTRP/FYN/CD36/PIK3CG/LYN/PLAT/DOCK8/SYK	42	Module 5
GO:0001906	cell killing	27/943	172/18866	1.20586e-07	5.30776e-06	4.09617e-06	SLAMF7/FCGR2B/XCL1/PTPRC/SLAMF6/CRTAM/CTSC/IL18/CADM1/LYZ/P2RX7/RASGRP1/CTSH/CORO1A/CD226/VAV1/LILRB1/TYROBP/IL18RAP/BCL2L11/APOL1/IL7R/F2RL1/HAVCR2/SERPINB9/SYK/SH2D1A	27	Module 5
GO:0072678	T cell migration	16/943	67/18866	1.35871e-07	5.93193e-06	4.57787e-06	XCL1/ITGB7/ADAM10/ITGAL/CXCL16/CCL5/CCL3/ITGA4/ADAM17/CCR2/CD200R1/CXCL10/CXCL11/PIK3CG/MYO1G/DOCK8	16	Module 5
GO:0050920	regulation of chemotaxis	32/943	229/18866	1.38776e-07	6.0099e-06	4.63805e-06	SLAMF8/XCL1/NRP1/NCKAP1L/P2RX4/C3AR1/LGMN/THBS1/IL16/ADAM10/CCL5/CCL3/C5AR1/ADAM17/CXCR4/DPP4/TIAM1/RAC2/CCR2/CCR1/CXCL10/VEGFC/ITGA2/ZSWIM6/F2RL1/CSF1R/VEGFA/TREM2/PLA2G7/SEMA3A/LYN/MPP1	32	Module 5
GO:0050866	negative regulation of cell activation	30/943	207/18866	1.51092e-07	6.49092e-06	5.00926e-06	FCGR2B/XCL1/PTPRC/PTPN22/CD84/IL2RA/NR1H3/UBASH3B/CRTAM/LGALS3/CD300A/LILRB1/TYROBP/LILRB2/MERTK/INPP5D/PELI1/SAMSN1/CCR2/CD86/CD80/IRF1/HAVCR2/TNFAIP3/TNFRSF21/GPNMB/LYN/PAG1/VSIG4/BTK	30	Module 5
GO:0006874	cellular calcium ion homeostasis	50/943	456/18866	1.59151e-07	6.78285e-06	5.23456e-06	CD52/XCL1/PTPRC/BNIP3/UBASH3B/TRPC6/CD4/P2RX7/P2RX4/C3AR1/ITPR2/ATP2B1/LPAR6/EDNRB/PTGDR/SLC24A4/ERO1A/CEMIP/MYO5A/CORO1A/CCL8/CCL5/CCL3/C5AR1/FPR3/FPR1/TMEM178A/CXCR4/CXCR6/CCR2/AGTR1/CCR1/RAP1GDS1/CXCL10/CXCL11/SNCA/PTGER4/HEXB/F2RL1/FYN/CD36/PIK3CG/LYN/CHD7/ADRA1A/JPH1/XK/LPAR4/P2RY10/GPR174	50	Module 5
GO:0050766	positive regulation of phagocytosis	16/943	68/18866	1.69513e-07	7.16762e-06	5.53149e-06	FCER1G/FCGR2B/PTPRC/PTPRJ/NCKAP1L/MERTK/SLC11A1/IL1B/PPARG/ITGA2/F2RL1/DOCK2/C2/TREM2/CD36/IL2RG	16	Module 5
GO:0002761	regulation of myeloid leukocyte differentiation	22/943	123/18866	1.72862e-07	7.25209e-06	5.59669e-06	C1QC/GPR137B/UBASH3B/CD4/EVI2B/CCL3/LILRB1/TYROBP/TMEM178A/INPP5D/RASSF2/MAFB/MITF/CCR1/HCLS1/LEF1/CAMK4/TREM2/LYN/CA2/DCSTAMP/MYC	22	Module 5
GO:0032732	positive regulation of interleukin-1 production	15/943	60/18866	1.74566e-07	7.2668e-06	5.60804e-06	PYHIN1/NLRP3/AIM2/CASP1/P2RX7/IL16/NOD2/CCL3/MALT1/TYROBP/CARD8/NLRC4/HAVCR2/LPL/RIPK2	15	Module 5
GO:0051250	negative regulation of lymphocyte activation	25/943	154/18866	1.81484e-07	7.49669e-06	5.78545e-06	FCGR2B/XCL1/PTPN22/IL2RA/CRTAM/LGALS3/CD300A/LILRB1/TYROBP/LILRB2/MERTK/INPP5D/PELI1/SAMSN1/CD86/CD80/IRF1/HAVCR2/TNFAIP3/TNFRSF21/GPNMB/LYN/PAG1/VSIG4/BTK	25	Module 5
GO:0002367	cytokine production involved in immune response	20/943	104/18866	1.82897e-07	7.4974e-06	5.78599e-06	FCER1G/XCL1/NLRP3/DENND1B/IL18/LACC1/NOD2/SCIMP/MALT1/CD226/LILRB1/BST2/IL18RAP/SLC11A1/IL1B/CCR2/CD96/F2RL1/CD36/BTK	20	Module 5
GO:2000106	regulation of leukocyte apoptotic process	18/943	86/18866	1.96762e-07	7.95997e-06	6.14298e-06	FCER1G/PRKCQ/CD3G/P2RX7/LGALS3/HIF1A/NOD2/CCL5/LILRB1/MERTK/ADAM17/HCLS1/PIK3CB/IL7R/GIMAP8/LYN/DOCK8/BTK	18	Module 5
GO:0048872	homeostasis of number of cells	34/943	256/18866	1.97146e-07	7.95997e-06	6.14298e-06	PDE4B/FCER1G/IL2RA/LIPA/AMPD3/NCKAP1L/P2RX7/LPCAT3/SLC11A2/HIF1A/CCNB2/CORO1A/BCL2L11/MERTK/INPP5D/ADAM17/STAT1/RASSF2/MAFB/SLC25A38/CCR2/HCLS1/PIK3CB/IL7R/GAPT/VEGFA/TNFAIP3/IKZF1/EZH2/NCAPG2/LYN/IL7/PTBP3/GPR174	34	Module 5
GO:0050854	regulation of antigen receptor-mediated signaling pathway	16/943	69/18866	2.10549e-07	8.43766e-06	6.51163e-06	FCGR2B/PTPRC/PTPN22/PTPRJ/LPXN/TESPA1/ELF1/LGALS3/PRKCH/CD300A/MALT1/CD226/TRAT1/GCSAM/LYN/SH2D1A	16	Module 5
GO:0007596	blood coagulation	41/943	343/18866	2.14283e-07	8.52371e-06	6.57804e-06	FCER1G/PABPC4/VAV3/PLAU/PAPSS2/PRKCQ/UBASH3B/PRCP/TRPC6/P2RX7/P2RX4/ITPR2/F10/GNG2/PRKCH/SERPINA1/THBS1/ANXA2/GATA6/VAV1/PLAUR/PLEK/MERTK/RAP2B/PIK3CB/TXK/TEC/HPSE/ITGA2/F2RL1/IRF1/LCP2/F13A1/ADTRP/FYN/CD36/PIK3CG/LYN/PLAT/DOCK8/SYK	41	Module 5
GO:0031343	positive regulation of cell killing	15/943	61/18866	2.20885e-07	8.65803e-06	6.6817e-06	XCL1/PTPRC/SLAMF6/CRTAM/CADM1/P2RX7/RASGRP1/CD226/VAV1/TYROBP/IL18RAP/BCL2L11/F2RL1/SYK/SH2D1A	15	Module 5
GO:0045576	mast cell activation	15/943	61/18866	2.20885e-07	8.65803e-06	6.6817e-06	FCER1G/CD84/CBL/C12orf4/RASGRP1/CD300A/CD226/ADGRE2/RAC2/HAVCR1/LCP2/PIK3CG/LYN/SYK/BTK	15	Module 5
GO:0002690	positive regulation of leukocyte chemotaxis	19/943	96/18866	2.30308e-07	8.96199e-06	6.91627e-06	XCL1/NCKAP1L/C3AR1/LGMN/THBS1/ADAM10/CCL5/CCL3/C5AR1/ADAM17/RAC2/CCR2/CCR1/CXCL10/VEGFC/F2RL1/CSF1R/VEGFA/PLA2G7	19	Module 5
GO:0048771	tissue remodeling	27/943	178/18866	2.4667e-07	9.52961e-06	7.35432e-06	GPR137B/CTSK/LIPA/UBASH3B/TPP1/IL18/P2RX7/HIF1A/ACP5/INPP5D/RASSF2/RAC2/CCR2/MITF/TFRC/SPP1/HAND2/CSF1R/TNFAIP3/GPNMB/SNX10/HOXA3/CHD7/CA2/DCSTAMP/IL7/SYK	27	Module 5
GO:0032651	regulation of interleukin-1 beta production	19/943	97/18866	2.73168e-07	1.03304e-05	7.9723e-06	PYHIN1/NLRP3/AIM2/CASP1/P2RX7/IGF1/NOD2/CCL3/MALT1/CD33/ACP5/TYROBP/CARD8/NLRC4/TNFAIP3/SERPINB1/TREM2/LPL/RIPK2	19	Module 5
GO:0042100	B cell proliferation	19/943	97/18866	2.73168e-07	1.03304e-05	7.9723e-06	FCGR2B/PTPRC/VAV3/NCKAP1L/RASGRP1/CD300A/IKZF3/TYROBP/INPP5D/PELI1/TFRC/LEF1/IL7R/GAPT/CD180/TNFRSF21/LYN/IL7/BTK	19	Module 5
GO:0050764	regulation of phagocytosis	19/943	97/18866	2.73168e-07	1.03304e-05	7.9723e-06	FCER1G/FCGR2B/PTPRC/PTPRJ/NCKAP1L/CD300A/MERTK/SLC11A1/IL1B/HCK/PPARG/ITGA2/F2RL1/DOCK2/C2/TREM2/CD36/SYK/IL2RG	19	Module 5
GO:0072503	cellular divalent inorganic cation homeostasis	52/943	492/18866	2.88512e-07	1.08343e-05	8.36121e-06	CD52/XCL1/PTPRC/BNIP3/UBASH3B/TRPC6/CD4/P2RX7/P2RX4/C3AR1/ITPR2/ATP2B1/LPAR6/EDNRB/PTGDR/SLC24A4/ERO1A/CEMIP/MYO5A/CORO1A/CCL8/CCL5/CCL3/C5AR1/FPR3/FPR1/TMEM178A/SLC11A1/CXCR4/CXCR6/CCR2/AGTR1/CCR1/RAP1GDS1/CXCL10/CXCL11/SNCA/SLC39A8/PTGER4/HEXB/F2RL1/FYN/CD36/PIK3CG/LYN/CHD7/ADRA1A/JPH1/XK/LPAR4/P2RY10/GPR174	52	Module 5
GO:0046777	protein autophosphorylation	32/943	237/18866	3.07581e-07	1.14265e-05	8.81823e-06	UHMK1/PTPRC/MYO3A/PAK1/TAOK3/FLT1/NLK/STK17B/HCK/STK4/RASSF2/CHEK2/RAP2B/PAK2/TXK/TEC/VEGFC/CAMK4/ITK/CSF1R/VEGFA/TTK/FYN/GPNMB/TRIM24/LYN/SLA/MELK/DAPK1/SYK/PRKX/BTK	32	Module 5
GO:0072676	lymphocyte migration	21/943	117/18866	3.08537e-07	1.14265e-05	8.81823e-06	XCL1/CRTAM/ITGB7/ADAM10/ITGAL/CCL8/CCL18/CXCL16/CCL5/CCL3/ITGA4/ADAM17/CCR2/GCSAM/CD200R1/CXCL10/CXCL11/ADTRP/PIK3CG/MYO1G/DOCK8	21	Module 5
GO:0046641	positive regulation of alpha-beta T cell proliferation	9/943	21/18866	3.19784e-07	1.17619e-05	9.07706e-06	XCL1/PTPRC/PTPN22/CD3E/IL18/CD28/CCR2/RIPK2/SYK	9	Module 5
GO:0032675	regulation of interleukin-6 production	25/943	159/18866	3.40342e-07	1.24072e-05	9.57507e-06	FCER1G/PTPN22/MMP8/NCKAP1L/P2RX7/IL16/NOD2/SCIMP/TYROBP/LILRB2/IL1B/CD200R1/TLR6/F2RL1/HAVCR2/MAPK13/TNFAIP3/TREM2/AKIRIN2/CD36/TWIST1/LPL/RIPK2/SYK/RAB7B	25	Module 5
GO:0050817	coagulation	41/943	349/18866	3.41949e-07	1.24072e-05	9.57507e-06	FCER1G/PABPC4/VAV3/PLAU/PAPSS2/PRKCQ/UBASH3B/PRCP/TRPC6/P2RX7/P2RX4/ITPR2/F10/GNG2/PRKCH/SERPINA1/THBS1/ANXA2/GATA6/VAV1/PLAUR/PLEK/MERTK/RAP2B/PIK3CB/TXK/TEC/HPSE/ITGA2/F2RL1/IRF1/LCP2/F13A1/ADTRP/FYN/CD36/PIK3CG/LYN/PLAT/DOCK8/SYK	41	Module 5
GO:0007229	integrin-mediated signaling pathway	20/943	108/18866	3.47717e-07	1.25318e-05	9.67121e-06	FCER1G/VAV3/NRP1/ITGB7/ADAM10/ITGAL/VAV1/TYROBP/PLEK/LIMS1/ITGA6/ITGA4/HCK/ITGB2/TXK/TEC/ITGA2/ITGB8/ADAM9/SYK	20	Module 5
GO:0050730	regulation of peptidyl-tyrosine phosphorylation	34/943	263/18866	3.75904e-07	1.34574e-05	1.03855e-05	PTPRC/NRP1/PTPRJ/CD3E/CBL/IL18/CD4/IGF1/SNX6/CD300A/CCL5/PECAM1/ADAM17/CASS4/SAMSN1/ITGB2/DOCK3/RAP2B/PAK2/CD80/HCLS1/TEC/SFRP2/CSF1R/VEGFA/TREM2/FYN/CD36/NCAPG2/LYN/RIPK2/ADRA1A/IL7/SYK	34	Module 5
GO:0033628	regulation of cell adhesion mediated by integrin	13/943	48/18866	4.22535e-07	1.50266e-05	1.15965e-05	PLAU/CD3E/LPXN/NCKAP1L/CCL5/SKAP1/CYP1B1/DPP4/SFRP2/PIK3CG/ADAM9/LYN/SYK	13	Module 5
GO:0055094	response to lipoprotein particle	11/943	34/18866	4.54874e-07	1.60702e-05	1.24019e-05	FCER1G/CD68/NPC1/ITGB2/PPARG/TLR6/ADTRP/CD36/LPL/SYK/ABCA1	11	Module 5
GO:0043547	positive regulation of GTPase activity	45/943	406/18866	4.90036e-07	1.71993e-05	1.32733e-05	SMAP2/XCL1/RGS18/RGS1/VAV3/ARHGAP30/DENND1B/SIPA1L2/NRP1/RGS10/NCKAP1L/SRGAP1/TBC1D30/ARHGDIB/RACGAP1/GIT2/ARHGAP11A/RASGRP1/TBC1D2B/ADAP2/CCL8/CCL18/CCL5/CCL3/VAV1/RASGRP3/ARHGAP25/LIMS1/ITGA6/AGFG1/SEC23B/RALGAPA2/TIAM1/ECT2/ACAP2/TBC1D14/RAP1GDS1/ARAP2/F2RL1/DOCK2/TAGAP/DOCK4/EZH2/ASAP1/DOCK8	45	Module 5
GO:0030193	regulation of blood coagulation	17/943	82/18866	4.94224e-07	1.72336e-05	1.32998e-05	FCER1G/PLAU/PRKCQ/UBASH3B/THBS1/ANXA2/PLAUR/PLEK/TXK/TEC/HPSE/F2RL1/ADTRP/CD36/LYN/PLAT/SYK	17	Module 5
GO:0010818	T cell chemotaxis	10/943	28/18866	5.34474e-07	1.8517e-05	1.42902e-05	XCL1/ADAM10/CXCL16/CCL5/CCL3/ADAM17/CCR2/CXCL10/CXCL11/PIK3CG	10	Module 5
GO:0002448	mast cell mediated immunity	13/943	49/18866	5.48979e-07	1.88976e-05	1.45839e-05	FCER1G/CD84/CBL/C12orf4/RASGRP1/CD300A/ADGRE2/RAC2/SERPINB9/PIK3CG/LYN/SYK/BTK	13	Module 5
GO:1905517	macrophage migration	14/943	57/18866	5.67532e-07	1.94117e-05	1.49807e-05	SLAMF8/P2RX4/C3AR1/EDNRB/LGALS3/THBS1/NUP85/CCL5/CCL3/C5AR1/CCR2/CD200R1/CSF1R/TREM2	14	Module 5
GO:0019882	antigen processing and presentation	31/943	232/18866	5.91157e-07	2.00252e-05	1.54541e-05	FCER1G/FCGR2B/CTSS/NCF2/KIF11/PSAP/KIF18A/RACGAP1/LGMN/THBS1/CTSH/NOD2/CD68/IFI30/LILRB2/RAB10/SLC11A1/CD8A/NCF4/KIF15/CENPE/HLA-DQB1/HLA-DMB/HLA-DMA/HLA-DOA/HLA-DPA1/TREM2/CD36/CTSL/CYBB/KIF4A	31	Module 5
GO:1900046	regulation of hemostasis	17/943	83/18866	5.92925e-07	2.00252e-05	1.54541e-05	FCER1G/PLAU/PRKCQ/UBASH3B/THBS1/ANXA2/PLAUR/PLEK/TXK/TEC/HPSE/F2RL1/ADTRP/CD36/LYN/PLAT/SYK	17	Module 5
GO:0002822	regulation of adaptive immune response based on somatic recombination of immune receptors built from immunoglobulin superfamily domains	24/943	153/18866	6.08079e-07	2.04087e-05	1.57501e-05	FCER1G/FCGR2B/XCL1/PTPRC/CR1/NLRP3/PRKCQ/IL18/CD4/P2RX7/MALT1/CD226/LILRB1/CD28/SLC11A1/IL1B/CCR2/CD80/TFRC/IL7R/HAVCR2/TNFAIP3/RIPK2/BTK	24	Module 5
GO:0032633	interleukin-4 production	11/943	35/18866	6.33513e-07	2.11302e-05	1.63069e-05	FCER1G/NLRP3/PRKCQ/CD3E/CD28/CD86/LEF1/ITK/HAVCR2/CD83/SYK	11	Module 5
GO:0001774	microglial cell activation	13/943	50/18866	7.08156e-07	2.33301e-05	1.80046e-05	C1QA/PTPRC/CTSC/MMP8/CCL3/MIR142/C5AR1/TYROBP/ITGB2/TLR6/SNCA/TREM2/IFNGR1	13	Module 5
GO:0002269	leukocyte activation involved in inflammatory response	13/943	50/18866	7.08156e-07	2.33301e-05	1.80046e-05	C1QA/PTPRC/CTSC/MMP8/CCL3/MIR142/C5AR1/TYROBP/ITGB2/TLR6/SNCA/TREM2/IFNGR1	13	Module 5
GO:0002886	regulation of myeloid leukocyte mediated immunity	14/943	58/18866	7.13988e-07	2.33787e-05	1.80422e-05	FCER1G/FCGR2B/CD84/C12orf4/CD300A/ADGRE2/TYROBP/ITGB2/RAC2/CCR2/F2RL1/LYN/SYK/BTK	14	Module 5
GO:0001818	negative regulation of cytokine production	41/943	360/18866	7.77708e-07	2.51584e-05	1.94156e-05	FCGR2B/XCL1/PTPRC/NLRP3/PTPN22/CD84/MMP8/NCKAP1L/ATP2B1/IGF1/DICER1/THBS1/TRIM25/MIR142/GATA6/RNF125/CD33/LILRB1/ACP5/BST2/TYROBP/CARD8/REL/MERTK/SLC11A1/NMI/CD96/CD200R1/TLR6/LEF1/PTGER4/HAVCR2/CD83/TNFAIP3/SERPINB1/TREM2/TNFRSF21/GPNMB/TWIST1/VSIG4/BTK	41	Module 5
GO:0062197	cellular response to chemical stress	41/943	360/18866	7.77708e-07	2.51584e-05	1.94156e-05	LRRC8C/LRRC8D/SLC2A1/SLC25A24/NCF2/ALOX5/CDK1/PSAP/BNIP3/ARNTL/PRR5L/TRPC6/HIF1A/ERO1A/PDE8A/RHOB/IL18RAP/CYP1B1/MAP1LC3A/MMP9/NCF4/FANCD2/ATG7/PPARG/ECT2/TLR6/SNCA/CCNA2/MAPK13/NCOA7/TNFAIP3/FYN/VNN1/CD36/AKR1B1/EZH2/MELK/DAPK1/CYBB/BTK/AIFM1	41	Module 5
GO:0150077	regulation of neuroinflammatory response	12/943	43/18866	8.26264e-07	2.65691e-05	2.05043e-05	PTPRC/CTSC/MMP8/IL18/IGF1/NUPR1/CCL3/MIR142/IL1B/MMP9/CD200R1/TREM2	12	Module 5
GO:0002456	T cell mediated immunity	19/943	104/18866	8.44252e-07	2.68262e-05	2.07027e-05	FCGR2B/XCL1/PTPRC/NLRP3/DENND1B/CTSC/IL18/P2RX7/CTSH/MALT1/LILRB1/IL18RAP/SLC11A1/CD8A/IL1B/CCR2/IL7R/BTN3A3/MYO1G	19	Module 5
GO:0002504	antigen processing and presentation of peptide or polysaccharide antigen via MHC class II	19/943	104/18866	8.44252e-07	2.68262e-05	2.07027e-05	FCER1G/FCGR2B/CTSS/KIF11/KIF18A/RACGAP1/LGMN/THBS1/IFI30/KIF15/CENPE/HLA-DQB1/HLA-DMB/HLA-DMA/HLA-DOA/HLA-DPA1/TREM2/CTSL/KIF4A	19	Module 5
GO:0046633	alpha-beta T cell proliferation	11/943	36/18866	8.71231e-07	2.75206e-05	2.12386e-05	XCL1/PTPRC/PTPN22/CD3E/IL18/CD28/CCR2/DOCK2/IRF1/RIPK2/SYK	11	Module 5
GO:0031663	lipopolysaccharide-mediated signaling pathway	14/943	59/18866	8.93429e-07	2.80568e-05	2.16524e-05	PTPN22/IL18/SCIMP/CCL5/CCL3/MALT1/CARD8/IL1B/HCK/CD180/TNFAIP3/CD36/LYN/RIPK2	14	Module 5
GO:0071675	regulation of mononuclear cell migration	13/943	51/18866	9.07248e-07	2.83251e-05	2.18595e-05	SLAMF8/C3AR1/LGALS3/LGMN/THBS1/CCL5/C5AR1/CCR2/CCR1/CXCL10/CSF1R/PLA2G7/LYN	13	Module 5
GO:0001776	leukocyte homeostasis	17/943	86/18866	1.00556e-06	3.12131e-05	2.40882e-05	PDE4B/FCER1G/IL2RA/NCKAP1L/P2RX7/HIF1A/CCNB2/CORO1A/BCL2L11/MERTK/ADAM17/CCR2/PIK3CB/GAPT/TNFAIP3/LYN/GPR174	17	Module 5
GO:0070371	ERK1 and ERK2 cascade	38/943	325/18866	1.02868e-06	3.17473e-05	2.45004e-05	XCL1/PTPRC/PTPN22/CHI3L1/DUSP10/NRP1/CD4/DUSP6/IGF1/SPRED1/PDE8A/RASGRP1/CTSH/NOD2/CCL8/CCL18/SCIMP/CCL5/CCL3/C5AR1/MARCO/IL1B/TIAM1/CCR1/HAND2/PTGER4/F2RL1/CSF1R/HAVCR2/MIR133B/TREM2/GPNMB/CD36/LYN/RIPK2/MYC/ADRA1A/SYK	38	Module 5
GO:0150078	positive regulation of neuroinflammatory response	8/943	18/18866	1.05722e-06	3.24416e-05	2.50363e-05	CTSC/MMP8/IL18/NUPR1/CCL3/MIR142/IL1B/TREM2	8	Module 5
GO:0050729	positive regulation of inflammatory response	24/943	158/18866	1.10495e-06	3.37135e-05	2.60178e-05	FCER1G/GBP5/CTSC/MMP8/IL18/IL16/NOD2/NUPR1/CCL3/MIR142/CD28/IL1B/CCR2/AGTR1/TLR6/SNCA/PTGER4/ITGA2/MAPK13/TREM2/PLA2G7/PIK3CG/LPL/BTK	24	Module 5
GO:0061900	glial cell activation	14/943	60/18866	1.11221e-06	3.37434e-05	2.60409e-05	C1QA/PTPRC/CTSC/MMP8/CCL3/MIR142/C5AR1/TYROBP/IL1B/ITGB2/TLR6/SNCA/TREM2/IFNGR1	14	Module 5
GO:0032640	tumor necrosis factor production	20/943	116/18866	1.14037e-06	3.42591e-05	2.64389e-05	CD2/FCER1G/PTPRC/PTPN22/PTPRJ/IGF1/DICER1/RASGRP1/NOD2/TMEM106A/CCL3/CD33/ACP5/HAVCR2/TNFAIP3/TREM2/GPNMB/CD36/TWIST1/RIPK2	20	Module 5
GO:0002708	positive regulation of lymphocyte mediated immunity	19/943	106/18866	1.14257e-06	3.42591e-05	2.64389e-05	FCER1G/XCL1/PTPRC/NLRP3/SLAMF6/CRTAM/IL18/CADM1/P2RX7/RASGRP1/MALT1/CD226/VAV1/IL18RAP/CD28/IL1B/TFRC/SH2D1A/BTK	19	Module 5
GO:0001912	positive regulation of leukocyte mediated cytotoxicity	13/943	52/18866	1.15473e-06	3.42591e-05	2.64389e-05	XCL1/PTPRC/SLAMF6/CRTAM/CADM1/P2RX7/RASGRP1/CD226/VAV1/TYROBP/IL18RAP/F2RL1/SH2D1A	13	Module 5
GO:0002704	negative regulation of leukocyte mediated immunity	13/943	52/18866	1.15473e-06	3.42591e-05	2.64389e-05	FCGR2B/XCL1/PTPRC/CR1/CD84/CD300A/LILRB1/BST2/CCR2/CD96/IL7R/HAVCR2/SERPINB9	13	Module 5
GO:0045730	respiratory burst	11/943	37/18866	1.18409e-06	3.49371e-05	2.69621e-05	CD52/SLAMF8/NCF2/DUSP10/SLC11A1/HCK/NCF4/RAC2/JCHAIN/PIK3CG/CYBB	11	Module 5
GO:0071346	cellular response to interferon-gamma	26/943	182/18866	1.32909e-06	3.90012e-05	3.00985e-05	XCL1/GBP4/GBP5/MRC1/NR1H3/CASP1/IRF8/CCL8/CCL18/CCL5/CCL3/TRIM25/IFI30/NMI/STAT1/HCK/IFNGR2/PPARG/CLDN1/TXK/IRF1/HLA-DQB1/HLA-DPA1/IFNGR1/DAPK1/RAB7B	26	Module 5
GO:0042267	natural killer cell mediated cytotoxicity	14/943	61/18866	1.37772e-06	4.02083e-05	3.10301e-05	SLAMF7/SLAMF6/CRTAM/IL18/CADM1/RASGRP1/CORO1A/CD226/VAV1/LILRB1/IL18RAP/HAVCR2/SERPINB9/SH2D1A	14	Module 5
GO:0050818	regulation of coagulation	17/943	88/18866	1.40984e-06	4.07759e-05	3.14682e-05	FCER1G/PLAU/PRKCQ/UBASH3B/THBS1/ANXA2/PLAUR/PLEK/TXK/TEC/HPSE/F2RL1/ADTRP/CD36/LYN/PLAT/SYK	17	Module 5
GO:0002715	regulation of natural killer cell mediated immunity	12/943	45/18866	1.41235e-06	4.07759e-05	3.14682e-05	SLAMF6/CRTAM/CADM1/RASGRP1/CD226/VAV1/LILRB1/IL18RAP/CD96/HAVCR2/SERPINB9/SH2D1A	12	Module 5
GO:0032731	positive regulation of interleukin-1 beta production	13/943	53/18866	1.46055e-06	4.19421e-05	3.23681e-05	PYHIN1/NLRP3/AIM2/CASP1/P2RX7/NOD2/CCL3/MALT1/TYROBP/CARD8/NLRC4/LPL/RIPK2	13	Module 5
GO:0001959	regulation of cytokine-mediated signaling pathway	26/943	183/18866	1.47704e-06	4.219e-05	3.25594e-05	PTPRC/NR1H3/BIRC3/MMP12/CASP4/CASP1/ELF1/HIF1A/CCL5/CARD8/IL1RN/ADAM17/CXCR4/STAT1/SAMHD1/IFNAR2/IFNGR2/PPARG/TXK/F2RL1/TNFAIP3/TREM2/IFNGR1/RIPK2/IL7/SYK	26	Module 5
GO:0048010	vascular endothelial growth factor receptor signaling pathway	18/943	98/18866	1.50559e-06	4.27778e-05	3.30131e-05	VAV3/NCF2/HHEX/NRP1/NCKAP1L/FLT1/HIF1A/VAV1/NRP2/IL1B/NCF4/PAK2/PIK3CB/VEGFC/VEGFA/FYN/ELMO1/CYBB	18	Module 5
GO:0030888	regulation of B cell proliferation	14/943	62/18866	1.69846e-06	4.77524e-05	3.68521e-05	FCGR2B/PTPRC/VAV3/NCKAP1L/CD300A/IKZF3/TYROBP/INPP5D/PELI1/TFRC/TNFRSF21/LYN/IL7/BTK	14	Module 5
GO:0045824	negative regulation of innate immune response	14/943	62/18866	1.69846e-06	4.77524e-05	3.68521e-05	SLAMF8/CR1/DUSP10/NR1H3/MMP12/LILRB1/NMI/SAMHD1/PPARG/CD96/HAVCR2/TNFAIP3/SERPINB9/VSIG4	14	Module 5
GO:0071706	tumor necrosis factor superfamily cytokine production	20/943	119/18866	1.72718e-06	4.82138e-05	3.72082e-05	CD2/FCER1G/PTPRC/PTPN22/PTPRJ/IGF1/DICER1/RASGRP1/NOD2/TMEM106A/CCL3/CD33/ACP5/HAVCR2/TNFAIP3/TREM2/GPNMB/CD36/TWIST1/RIPK2	20	Module 5
GO:0071902	positive regulation of protein serine/threonine kinase activity	39/943	345/18866	1.73282e-06	4.82138e-05	3.72082e-05	PTPRC/MAP3K8/CDK1/PAK1/CDKN1B/P2RX7/DUSP6/IGF1/TAOK3/FLT1/CCNK/THBS1/CEMIP/RASGRP1/NOD2/MLKL/MAP2K6/FAM20A/C5AR1/FPR1/ADAM17/IL1B/CXCR4/STK4/TIAM1/PIK3CB/TLR6/SNCA/ACSL1/MAP3K1/CCNB1/CSF1R/VEGFA/PIK3CG/EZH2/ADAM9/RIPK2/PBK/SYK	39	Module 5
GO:0061041	regulation of wound healing	23/943	151/18866	1.75258e-06	4.85121e-05	3.74384e-05	FCER1G/DUSP10/ALOX5/PLAU/PRKCQ/UBASH3B/THBS1/ANXA2/PLAUR/PLEK/CXCR4/CLDN1/TXK/TEC/HPSE/F2RL1/CD109/TNFAIP3/ADTRP/CD36/LYN/PLAT/SYK	23	Module 5
GO:0043087	regulation of GTPase activity	49/943	481/18866	1.8468e-06	5.08579e-05	3.92488e-05	SMAP2/XCL1/RGS18/RGS1/GPR137B/VAV3/ARHGAP30/DENND1B/SIPA1L2/NRP1/RGS10/NCKAP1L/SRGAP1/TBC1D30/PLXNC1/ARHGDIB/RACGAP1/FGD6/GIT2/ARHGAP11A/RASGRP1/TBC1D2B/ADAP2/CCL8/CCL18/CCL5/CCL3/VAV1/RASGRP3/ARHGAP25/LIMS1/ITGA6/AGFG1/SEC23B/RALGAPA2/TIAM1/ECT2/ACAP2/TBC1D14/RAP1GDS1/ARAP2/IQGAP2/F2RL1/DOCK2/TAGAP/DOCK4/EZH2/ASAP1/DOCK8	49	Module 5
GO:0009612	response to mechanical stimulus	28/943	209/18866	1.94806e-06	5.33729e-05	4.11897e-05	TXNIP/SLC2A1/CHI3L1/TLR5/BNIP3/CHEK1/MMP7/CASP5/CASP1/P2RX7/THBS1/PKD1L3/IL1B/CXCR4/STAT1/PPARG/CXCL10/SLC1A3/PTGER4/ITGA2/MAP3K1/CCNB1/IRF1/FYN/TMEM120A/SLC26A5/TNFRSF10A/STRBP	28	Module 5
GO:0002821	positive regulation of adaptive immune response	19/943	110/18866	2.04293e-06	5.54068e-05	4.27593e-05	FCER1G/XCL1/PTPRC/NLRP3/PRKCQ/IL18/CD4/P2RX7/SKAP1/MALT1/CD226/CD28/SLC11A1/IL1B/CCR2/CD80/TFRC/RIPK2/BTK	19	Module 5
GO:0032680	regulation of tumor necrosis factor production	19/943	110/18866	2.04293e-06	5.54068e-05	4.27593e-05	CD2/FCER1G/PTPRC/PTPN22/PTPRJ/IGF1/DICER1/RASGRP1/NOD2/CCL3/CD33/ACP5/HAVCR2/TNFAIP3/TREM2/GPNMB/CD36/TWIST1/RIPK2	19	Module 5
GO:0032673	regulation of interleukin-4 production	10/943	32/18866	2.18861e-06	5.90595e-05	4.55782e-05	FCER1G/NLRP3/PRKCQ/CD3E/CD28/CD86/LEF1/HAVCR2/CD83/SYK	10	Module 5
GO:0034599	cellular response to oxidative stress	36/943	310/18866	2.30952e-06	6.20107e-05	4.78558e-05	SLC25A24/NCF2/ALOX5/CDK1/PSAP/BNIP3/ARNTL/PRR5L/TRPC6/HIF1A/ERO1A/PDE8A/RHOB/IL18RAP/CYP1B1/MAP1LC3A/MMP9/NCF4/FANCD2/ATG7/ECT2/TLR6/SNCA/CCNA2/MAPK13/NCOA7/TNFAIP3/FYN/VNN1/CD36/EZH2/MELK/DAPK1/CYBB/BTK/AIFM1	36	Module 5
GO:0043300	regulation of leukocyte degranulation	12/943	47/18866	2.33937e-06	6.21901e-05	4.79942e-05	FCER1G/FCGR2B/CD84/C12orf4/CD300A/ADGRE2/ITGB2/RAC2/CCR2/F2RL1/LYN/SYK	12	Module 5
GO:0043303	mast cell degranulation	12/943	47/18866	2.33937e-06	6.21901e-05	4.79942e-05	FCER1G/CD84/CBL/C12orf4/RASGRP1/CD300A/ADGRE2/RAC2/PIK3CG/LYN/SYK/BTK	12	Module 5
GO:0051235	maintenance of location	37/943	324/18866	2.50053e-06	6.6147e-05	5.10479e-05	GPSM2/XCL1/PTPRC/ASPM/NR1H3/UBASH3B/FTH1/CD4/P2RX7/ITPR2/TWF1/OSBPL8/ERO1A/CEMIP/MYO5A/CORO1A/CCL3/FTL/HK2/CCDC88A/IL1B/NRIP1/PPARG/OSBPL11/CXCL10/CXCL11/SNCA/HEXB/GM2A/CD36/LPL/LYN/CHD7/MSR1/JPH1/PLIN2/ABCA1	37	Module 5
GO:0140014	mitotic nuclear division	34/943	286/18866	2.60264e-06	6.85107e-05	5.2872e-05	CDC14A/NUF2/CENPF/KIF14/CDK1/KIF11/MKI67/CHEK1/KIF18A/CDKN1B/RACGAP1/IGF1/DLGAP5/BUB1B/NUSAP1/CCNB2/PRC1/NDC80/NCAPH/SGO2/CD28/BUB1/IL1B/TPX2/DSN1/CHEK2/NCAPG/CENPE/CCNB1/CENPK/TTK/ANLN/NCAPG2/KIF4A	34	Module 5
GO:0001894	tissue homeostasis	32/943	261/18866	2.63451e-06	6.90112e-05	5.32583e-05	GPR137B/SLC2A1/CTSK/LIPA/UBASH3B/TPP1/LYZ/P2RX7/P2RX4/CTSH/CORO1A/NOD2/PECAM1/ACP5/INPP5D/CXADR/RAC2/CCR2/CLDN1/TFRC/SPP1/JCHAIN/SLC39A8/CSF1R/VEGFA/TNFAIP3/SNX10/AKR1B1/CA2/DCSTAMP/IL7/SYK	32	Module 5
GO:0002291	T cell activation via T cell receptor contact with antigen bound to MHC molecule on antigen presenting cell	6/943	10/18866	2.71106e-06	7.06717e-05	5.45398e-05	APBB1IP/LGALS3/ITGAL/LILRB1/HAVCR2/HLA-DMB	6	Module 5
GO:0002700	regulation of production of molecular mediator of immune response	22/943	144/18866	2.77999e-06	7.16651e-05	5.53064e-05	FCER1G/FCGR2B/XCL1/PTPRC/NLRP3/PTPN22/CD244/IL18/NOD2/SCIMP/MALT1/CD226/LILRB1/BST2/CD28/IL1B/CCR2/CD96/TFRC/F2RL1/CD36/BTK	22	Module 5
GO:0002577	regulation of antigen processing and presentation	8/943	20/18866	2.78264e-06	7.16651e-05	5.53064e-05	FCGR2B/THBS1/NOD2/CD68/LILRB2/SLC11A1/HLA-DOA/TREM2	8	Module 5
GO:0034142	toll-like receptor 4 signaling pathway	11/943	40/18866	2.7892e-06	7.16651e-05	5.53064e-05	PTPN22/PIK3AP1/NR1H3/SCIMP/PELI1/ITGB2/F2RL1/TNFAIP3/LYN/RIPK2/RAB7B	11	Module 5
GO:0031295	T cell costimulation	13/943	56/18866	2.85401e-06	7.26353e-05	5.60551e-05	MAP3K8/CD3E/PAK1/VAV1/CD28/ICOS/DPP4/GRAP2/CD86/PAK2/CD80/FYN/LYN	13	Module 5
GO:1904645	response to amyloid-beta	13/943	56/18866	2.85401e-06	7.26353e-05	5.60551e-05	FCGR2B/MMP12/CASP4/IGF1/SNX6/LGMN/BCL2L11/ITGA4/MMP9/TLR6/TREM2/FYN/CD36	13	Module 5
GO:0002718	regulation of cytokine production involved in immune response	16/943	83/18866	2.94826e-06	7.46801e-05	5.76332e-05	FCER1G/XCL1/NLRP3/IL18/NOD2/SCIMP/MALT1/CD226/LILRB1/BST2/IL1B/CCR2/CD96/F2RL1/CD36/BTK	16	Module 5
GO:0002279	mast cell activation involved in immune response	12/943	48/18866	2.97831e-06	7.5087e-05	5.79472e-05	FCER1G/CD84/CBL/C12orf4/RASGRP1/CD300A/ADGRE2/RAC2/PIK3CG/LYN/SYK/BTK	12	Module 5
GO:0046640	regulation of alpha-beta T cell proliferation	10/943	33/18866	3.00009e-06	7.52826e-05	5.80981e-05	XCL1/PTPRC/PTPN22/CD3E/IL18/CD28/CCR2/IRF1/RIPK2/SYK	10	Module 5
GO:0046718	viral entry into host cell	21/943	134/18866	3.07361e-06	7.67687e-05	5.9245e-05	CR1/MRC1/CDK1/IFITM1/CD4/ITGB7/SELPLG/TRIM25/NPC1/CXCR4/DPP4/CXADR/CD86/CD80/CLDN1/TFRC/ITGA2/HAVCR1/WWP1/CTSB/CTSL	21	Module 5
GO:1903555	regulation of tumor necrosis factor superfamily cytokine production	19/943	113/18866	3.09693e-06	7.69931e-05	5.94182e-05	CD2/FCER1G/PTPRC/PTPN22/PTPRJ/IGF1/DICER1/RASGRP1/NOD2/CCL3/CD33/ACP5/HAVCR2/TNFAIP3/TREM2/GPNMB/CD36/TWIST1/RIPK2	19	Module 5
GO:0002495	antigen processing and presentation of peptide antigen via MHC class II	18/943	103/18866	3.17427e-06	7.85521e-05	6.06213e-05	FCER1G/FCGR2B/CTSS/KIF11/KIF18A/RACGAP1/LGMN/IFI30/KIF15/CENPE/HLA-DQB1/HLA-DMB/HLA-DMA/HLA-DOA/HLA-DPA1/TREM2/CTSL/KIF4A	18	Module 5
GO:2000116	regulation of cysteine-type endopeptidase activity	30/943	239/18866	3.32161e-06	8.18213e-05	6.31443e-05	NLRP3/AIM2/BIRC3/CASP1/LGMN/THBS1/CTSH/MALT1/PLAUR/CARD8/BCL2L11/CASP10/NLRC4/MMP9/PPARG/PAK2/SNCA/LEF1/SFRP2/VEGFA/SERPINB9/FYN/RIPK2/MYC/TNFRSF10A/ST18/DAPK1/SYK/TNFSF15/AIFM1	30	Module 5
GO:0060099	regulation of phagocytosis engulfment	7/943	15/18866	3.44574e-06	8.44915e-05	6.52049e-05	NCKAP1L/CD300A/PPARG/ITGA2/F2RL1/TREM2/CD36	7	Module 5
GO:0042269	regulation of natural killer cell mediated cytotoxicity	11/943	41/18866	3.64077e-06	8.88678e-05	6.85823e-05	SLAMF6/CRTAM/CADM1/RASGRP1/CD226/VAV1/LILRB1/IL18RAP/HAVCR2/SERPINB9/SH2D1A	11	Module 5
GO:0010950	positive regulation of endopeptidase activity	25/943	181/18866	3.92669e-06	9.52009e-05	7.34697e-05	CR1/NLRP3/AIM2/CASP1/LGMN/CTSH/MALT1/CARD8/BCL2L11/CASP10/NLRC4/PPARG/SNCA/SFRP2/AKIRIN2/FYN/LYN/RIPK2/MYC/TNFRSF10A/ST18/DAPK1/SYK/TNFSF15/AIFM1	25	Module 5
GO:0044409	entry into host	22/943	147/18866	3.93568e-06	9.52009e-05	7.34697e-05	CR1/MRC1/CDK1/IFITM1/CBL/CD4/ITGB7/SELPLG/TRIM25/NPC1/CXCR4/DPP4/CXADR/CD86/CD80/CLDN1/TFRC/ITGA2/HAVCR1/WWP1/CTSB/CTSL	22	Module 5
GO:0042908	xenobiotic transport	10/943	34/18866	4.0606e-06	9.7782e-05	7.54617e-05	LRRC8C/LRRC8D/SLC2A1/ABCC4/SLC47A1/SLC6A6/ABCC5/CLDN1/SLC36A1/ABCB1	10	Module 5
GO:0002824	positive regulation of adaptive immune response based on somatic recombination of immune receptors built from immunoglobulin superfamily domains	18/943	105/18866	4.21617e-06	0.000101075	7.80032e-05	FCER1G/XCL1/PTPRC/NLRP3/PRKCQ/IL18/CD4/P2RX7/MALT1/CD226/CD28/SLC11A1/IL1B/CCR2/CD80/TFRC/RIPK2/BTK	18	Module 5
GO:0031294	lymphocyte costimulation	13/943	58/18866	4.34295e-06	0.000103652	7.99916e-05	MAP3K8/CD3E/PAK1/VAV1/CD28/ICOS/DPP4/GRAP2/CD86/PAK2/CD80/FYN/LYN	13	Module 5
GO:0002548	monocyte chemotaxis	14/943	67/18866	4.52779e-06	0.000107111	8.26613e-05	SLAMF8/XCL1/FLT1/LGALS3/LGMN/CCL8/CCL18/CCL5/CCL3/CCR2/CCR1/CXCL10/PLA2G7/LYN	14	Module 5
GO:0045670	regulation of osteoclast differentiation	14/943	67/18866	4.52779e-06	0.000107111	8.26613e-05	GPR137B/UBASH3B/CCL3/LILRB1/TYROBP/TMEM178A/INPP5D/RASSF2/MAFB/MITF/CCR1/CAMK4/TREM2/CA2	14	Module 5
GO:0050731	positive regulation of peptidyl-tyrosine phosphorylation	26/943	195/18866	4.90172e-06	0.000115448	8.90954e-05	PTPRC/NRP1/PTPRJ/CD3E/IL18/CD4/IGF1/CCL5/PECAM1/ADAM17/CASS4/DOCK3/PAK2/CD80/HCLS1/TEC/CSF1R/VEGFA/TREM2/FYN/CD36/NCAPG2/LYN/RIPK2/ADRA1A/SYK	26	Module 5
GO:0043030	regulation of macrophage activation	13/943	59/18866	5.31782e-06	0.000124702	9.62365e-05	FCGR2B/PTPRC/GPR137B/NR1H3/CTSC/MMP8/THBS1/CCL3/MIR142/TLR6/HAVCR2/TREM2/VSIG4	13	Module 5
GO:0060759	regulation of response to cytokine stimulus	26/943	196/18866	5.38844e-06	0.000125808	9.70905e-05	PTPRC/NR1H3/BIRC3/MMP12/CASP4/CASP1/ELF1/HIF1A/CCL5/CARD8/IL1RN/ADAM17/CXCR4/STAT1/SAMHD1/IFNAR2/IFNGR2/PPARG/TXK/F2RL1/TNFAIP3/TREM2/IFNGR1/RIPK2/IL7/SYK	26	Module 5
GO:0046643	regulation of gamma-delta T cell activation	6/943	11/18866	5.71125e-06	0.000132768	0.000102461	PTPRC/NCKAP1L/NOD2/LILRB1/LEF1/SYK	6	Module 5
GO:1905153	regulation of membrane invagination	7/943	16/18866	5.86121e-06	0.000135667	0.000104699	NCKAP1L/CD300A/PPARG/ITGA2/F2RL1/TREM2/CD36	7	Module 5
GO:0045124	regulation of bone resorption	11/943	43/18866	6.04674e-06	0.00013936	0.000107549	GPR137B/UBASH3B/P2RX7/INPP5D/TFRC/SPP1/CSF1R/TNFAIP3/CA2/DCSTAMP/SYK	11	Module 5
GO:0002576	platelet degranulation	20/943	129/18866	6.20728e-06	0.000142449	0.000109933	FCER1G/SCCPDH/LEFTY2/PSAP/IGF1/ABCC4/VTI1B/SERPINA1/THBS1/PECAM1/PLEK/TUBA4A/VEGFC/LHFPL2/VEGFA/CD109/F13A1/CD36/LYN/SYK	20	Module 5
GO:0002832	negative regulation of response to biotic stimulus	17/943	98/18866	6.56853e-06	0.000150098	0.000115836	SLAMF8/CR1/DUSP10/IL2RA/NR1H3/MMP12/RNF125/LILRB1/CARD8/NMI/SAMHD1/PPARG/CD96/HAVCR2/TNFAIP3/SERPINB9/VSIG4	17	Module 5
GO:0052548	regulation of endopeptidase activity	44/943	434/18866	6.96872e-06	0.000158568	0.000122372	CR1/NLRP3/AIM2/BIRC3/CASP1/PEBP1/LGMN/SERPINA1/THBS1/ANXA2/CTSH/MALT1/SERPINB8/SPINT2/BST2/PLAUR/CARD8/BCL2L11/CASP10/NLRC4/COL6A3/MMP9/CSTB/PPARG/PAK2/RARRES1/SNCA/LEF1/SFRP2/VEGFA/CD109/SERPINB1/SERPINB9/AKIRIN2/FYN/LYN/RIPK2/MYC/TNFRSF10A/ST18/DAPK1/SYK/TNFSF15/AIFM1	44	Module 5
GO:0006869	lipid transport	41/943	393/18866	7.1431e-06	0.00016185	0.000124905	SLC2A1/ACSL5/PSAP/NR1H3/SLCO2B1/CHKA/P2RX7/P2RX4/LPCAT3/OSBPL8/ABCC4/SGPP1/THBS1/AQP9/ATP8B4/ANXA2/MAP2K6/NPC1/APOC1/IL1B/PLTP/APOL6/APOL1/APOL3/PPARG/AGTR1/OSBPL11/SPP1/MTTP/ACSL1/GM2A/CD36/OSBPL3/ABCB1/CLN8/MSR1/SYK/UGCG/PLIN2/ABCA1/ACSL4	41	Module 5
GO:2000516	positive regulation of CD4-positive alpha-beta T cell activation	10/943	36/18866	7.18535e-06	0.000162123	0.000125116	XCL1/NLRP3/PRKCQ/IL18/NCKAP1L/MALT1/CD86/CD80/CD83/RIPK2	10	Module 5
GO:0019886	antigen processing and presentation of exogenous peptide antigen via MHC class II	17/943	99/18866	7.56638e-06	0.000170006	0.000131199	FCER1G/FCGR2B/CTSS/KIF11/KIF18A/RACGAP1/LGMN/IFI30/KIF15/CENPE/HLA-DQB1/HLA-DMB/HLA-DMA/HLA-DOA/HLA-DPA1/CTSL/KIF4A	17	Module 5
GO:0042088	T-helper 1 type immune response	11/943	44/18866	7.70074e-06	0.000172304	0.000132973	XCL1/IL18/TMEM98/IL18RAP/SLC11A1/IL1B/CCR2/CD80/LEF1/HAVCR2/RIPK2	11	Module 5
GO:0042113	B cell activation	36/943	328/18866	8.38635e-06	0.000186866	0.000144211	SLAMF8/FCGR2B/PTPRC/EXO1/VAV3/HHEX/BLNK/PTPRJ/NCKAP1L/RASGRP1/NOD2/CD300A/IKZF3/MALT1/BST2/TYROBP/ITGA4/CD28/INPP5D/ADAM17/PELI1/SAMSN1/CMTM7/CD86/TFRC/LEF1/IL7R/GAPT/CD180/TNFAIP3/TNFRSF21/SKAP2/LYN/IL7/SYK/BTK	36	Module 5
GO:0045637	regulation of myeloid cell differentiation	31/943	263/18866	8.47225e-06	0.000188	0.000145086	C1QC/GPR137B/PRKCQ/UBASH3B/CD4/NCKAP1L/LGALS3/HIF1A/THBS1/EVI2B/CCL3/LILRB1/TYROBP/TMEM178A/INPP5D/STAT1/RASSF2/MAFB/MITF/CCR1/HCLS1/GPR171/LEF1/CAMK4/TREM2/NCAPG2/LYN/CA2/DCSTAMP/MYC/RAB7B	31	Module 5
GO:0010952	positive regulation of peptidase activity	26/943	201/18866	8.5522e-06	0.000188993	0.000145852	CR1/NLRP3/AIM2/CASP1/LGMN/CTSH/MALT1/CARD8/BCL2L11/TANK/CASP10/NLRC4/PPARG/SNCA/SFRP2/AKIRIN2/FYN/LYN/RIPK2/MYC/TNFRSF10A/ST18/DAPK1/SYK/TNFSF15/AIFM1	26	Module 5
GO:0002702	positive regulation of production of molecular mediator of immune response	17/943	100/18866	8.69785e-06	0.000190643	0.000147125	FCER1G/XCL1/PTPRC/NLRP3/PTPN22/CD244/IL18/NOD2/SCIMP/MALT1/CD226/LILRB1/CD28/IL1B/TFRC/F2RL1/CD36	17	Module 5
GO:0006672	ceramide metabolic process	17/943	100/18866	8.69785e-06	0.000190643	0.000147125	SGPL1/PSAP/ACER3/P2RX7/SPTLC2/HEXA/ORMDL3/B3GALT1/HEXB/GM2A/ST8SIA4/ITGB8/CLN8/ASAH1/NSMAF/UGCG/GLA	17	Module 5
GO:0043405	regulation of MAP kinase activity	37/943	342/18866	8.76382e-06	0.000191308	0.000147639	PTPRC/PTPN22/DUSP10/MAP3K8/CDK1/PTPRJ/PAK1/P2RX7/DUSP6/IGF1/TAOK3/FLT1/SPRED1/THBS1/RASGRP1/NOD2/MLKL/MAP2K6/CD300A/C5AR1/FPR1/IL1B/CXCR4/TIAM1/PIK3CB/TLR6/SFRP2/MAP3K1/VEGFA/STK38/PIK3CG/EZH2/ADAM9/LYN/RIPK2/PBK/SYK	37	Module 5
GO:0071404	cellular response to low-density lipoprotein particle stimulus	8/943	23/18866	9.47052e-06	0.000205898	0.000158898	FCER1G/NPC1/ITGB2/PPARG/CD36/LPL/SYK/ABCA1	8	Module 5
GO:0030889	negative regulation of B cell proliferation	7/943	17/18866	9.53406e-06	0.000206443	0.000159319	FCGR2B/CD300A/TYROBP/INPP5D/TNFRSF21/LYN/BTK	7	Module 5
GO:1904646	cellular response to amyloid-beta	11/943	45/18866	9.73521e-06	0.000209952	0.000162027	FCGR2B/CASP4/IGF1/SNX6/LGMN/BCL2L11/ITGA4/TLR6/TREM2/FYN/CD36	11	Module 5
GO:0010876	lipid localization	44/943	440/18866	9.86739e-06	0.000211952	0.00016357	SLC2A1/ACSL5/PSAP/NR1H3/SLCO2B1/CHKA/P2RX7/P2RX4/LPCAT3/OSBPL8/ABCC4/SGPP1/THBS1/AQP9/ATP8B4/ANXA2/MAP2K6/NPC1/APOC1/IL1B/PLTP/NRIP1/APOL6/APOL1/APOL3/PPARG/AGTR1/OSBPL11/SPP1/MTTP/ACSL1/HEXB/GM2A/CD36/OSBPL3/ABCB1/CLN8/LPL/MSR1/SYK/UGCG/PLIN2/ABCA1/ACSL4	44	Module 5
GO:0050663	cytokine secretion	14/943	72/18866	1.09548e-05	0.000234372	0.000180873	FCGR2B/NLRP3/TLR5/CRTAM/CADM1/P2RX7/NOD2/TMEM106A/TLR6/PTGER4/LCP2/BTN3A1/LYN/SYK	14	Module 5
GO:0038093	Fc receptor signaling pathway	29/943	241/18866	1.1025e-05	0.000234937	0.000181309	FCER1G/FCGR2A/FCGR2B/PTPRC/VAV3/FCGR3A/PRKCQ/PTPRJ/CD3G/PAK1/NCKAP1L/ARPC3/MALT1/VAV1/HCK/GRAP2/PAK2/CD200R1/PIK3CB/TEC/MAP3K1/ITK/LCP2/FYN/ELMO1/MYO1G/LYN/SYK/BTK	29	Module 5
GO:0000280	nuclear division	43/943	428/18866	1.10717e-05	0.000235	0.000181358	CDC14A/NUF2/CENPF/HORMAD1/ASPM/KIF14/CDK1/KIF11/MKI67/CHEK1/KIF18A/CDKN1B/RACGAP1/IGF1/TDRD9/DLGAP5/BUB1B/NUSAP1/CCNB2/PRC1/TOP2A/BRIP1/NDC80/NCAPH/BCL2L11/SGO2/CD28/BUB1/IL1B/TPX2/DSN1/CHEK2/DMC1/FANCD2/NCAPG/CENPE/CCNB1/CENPK/TTK/ANLN/NCAPG2/CCNE2/KIF4A	43	Module 5
GO:0007265	Ras protein signal transduction	37/943	346/18866	1.13972e-05	0.00023969	0.000184977	RAB42/GPSM2/NRAS/MYOC/KIF14/NRP1/SHTN1/RAB39A/CBL/ARHGDIB/IGF1/LPAR6/RASGRP1/PECAM1/CYTH1/VAV1/RHOB/RASGRP3/TIAM1/CYTH4/GRAP2/RAC2/AGTR1/RAP2B/ARHGEF3/CCNA2/F2RL1/RALA/ELMO1/LYN/PSD3/ADRA1A/FBP1/ABCA1/LPAR4/P2RY10/GPR174	37	Module 5
GO:0070372	regulation of ERK1 and ERK2 cascade	34/943	306/18866	1.14229e-05	0.00023969	0.000184977	XCL1/PTPRC/PTPN22/CHI3L1/DUSP10/NRP1/CD4/DUSP6/SPRED1/PDE8A/RASGRP1/NOD2/CCL8/CCL18/SCIMP/CCL5/CCL3/C5AR1/MARCO/IL1B/TIAM1/CCR1/HAND2/F2RL1/CSF1R/HAVCR2/MIR133B/TREM2/GPNMB/CD36/LYN/RIPK2/ADRA1A/SYK	34	Module 5
GO:0032613	interleukin-10 production	13/943	63/18866	1.14266e-05	0.00023969	0.000184977	FCER1G/FCGR2B/XCL1/MMP8/NOD2/LILRB1/TYROBP/CD28/F2RL1/CD83/TREM2/TNFRSF21/SYK	13	Module 5
GO:0010742	macrophage derived foam cell differentiation	10/943	38/18866	1.21996e-05	0.000252942	0.000195204	NR1H3/IL18/PRKCH/STAT1/PPARG/AGTR1/CD36/LPL/MSR1/ABCA1	10	Module 5
GO:0046466	membrane lipid catabolic process	10/943	38/18866	1.21996e-05	0.000252942	0.000195204	PPT1/SGPL1/PSAP/ACER3/HEXA/CYP1B1/HEXB/GM2A/ASAH1/GLA	10	Module 5
GO:0090077	foam cell differentiation	10/943	38/18866	1.21996e-05	0.000252942	0.000195204	NR1H3/IL18/PRKCH/STAT1/PPARG/AGTR1/CD36/LPL/MSR1/ABCA1	10	Module 5
GO:0007160	cell-matrix adhesion	28/943	230/18866	1.25015e-05	0.00025701	0.000198344	MYOC/PLAU/NRP1/PTPRJ/CD3E/MMP12/ITGB7/NID2/THBS1/FMN1/ITGAL/SKAP1/PECAM1/LIMS1/BCL2L11/ITGA6/ITGA4/TIAM1/ITGB2/PARVG/CD96/ADAMTS9/PIK3CB/HPSE/ITGA2/VEGFA/CD36/ADAM9	28	Module 5
GO:0002698	negative regulation of immune effector process	19/943	124/18866	1.2509e-05	0.00025701	0.000198344	SLAMF8/FCGR2B/XCL1/PTPRC/CR1/CD84/DUSP10/IL2RA/LGALS3/CD300A/RNF125/LILRB1/BST2/CCR2/CD96/IL7R/HAVCR2/SERPINB9/VSIG4	19	Module 5
GO:0007059	chromosome segregation	36/943	334/18866	1.25394e-05	0.00025701	0.000198344	NUF2/CENPF/HORMAD1/KIF14/MKI67/KIF18A/RACGAP1/SKA3/DLGAP5/BUB1B/KNL1/NUSAP1/PRC1/CENPN/TOP2A/BRCA1/BRIP1/AXIN2/NDC80/NCAPH/SGO2/BUB1/HJURP/DSN1/DMC1/FANCD2/ECT2/NCAPG/CENPE/CCNB1/CENPK/TTK/NCAPG2/ESCO2/CCNE2/KIF4A	36	Module 5
GO:0070227	lymphocyte apoptotic process	14/943	73/18866	1.29383e-05	0.000264177	0.000203874	IL2RA/PRKCQ/CD3G/P2RX7/LGALS3/HIF1A/CCL5/BCL2L11/IL7R/TNFRSF21/GIMAP8/LYN/DOCK8/BTK	14	Module 5
GO:0002720	positive regulation of cytokine production involved in immune response	12/943	55/18866	1.35781e-05	0.000274253	0.00021165	FCER1G/XCL1/NLRP3/IL18/NOD2/SCIMP/MALT1/CD226/LILRB1/IL1B/F2RL1/CD36	12	Module 5
GO:0032753	positive regulation of interleukin-4 production	8/943	24/18866	1.3585e-05	0.000274253	0.00021165	FCER1G/NLRP3/PRKCQ/CD3E/CD28/CD86/HAVCR2/SYK	8	Module 5
GO:0045954	positive regulation of natural killer cell mediated cytotoxicity	8/943	24/18866	1.3585e-05	0.000274253	0.00021165	SLAMF6/CRTAM/CADM1/RASGRP1/CD226/VAV1/IL18RAP/SH2D1A	8	Module 5
GO:0051056	regulation of small GTPase mediated signal transduction	35/943	323/18866	1.47081e-05	0.000295365	0.000227943	VAV3/ARHGAP30/MYOC/KIF14/SIPA1L2/NRP1/CBL/SRGAP1/ARHGDIB/RACGAP1/IGF1/LPAR6/ARHGAP11A/RASGRP1/CYTH1/VAV1/RHOB/ARHGAP25/RALGAPA2/TIAM1/CYTH4/RAC2/ECT2/ARHGEF3/ARAP2/F2RL1/TAGAP/LYN/PSD3/ADRA1A/FBP1/ABCA1/LPAR4/P2RY10/GPR174	35	Module 5
GO:0046942	carboxylic acid transport	37/943	350/18866	1.47407e-05	0.000295365	0.000227943	LRRC8C/LRRC8D/KMO/SLC2A1/ACSL5/PSAP/SLC16A12/FOLR2/SLCO2B1/P2RX7/P2RX4/ABCC4/SLC7A7/THBS1/AQP9/SLC7A6/SLC47A1/MAP2K6/SLC16A6/SLC11A1/IL1B/SNAP25/PPARG/SLC6A6/SLC25A38/ACSL1/SLC1A3/SLC36A1/EMB/SLC16A10/CD36/SLC26A5/SYK/PLIN2/XK/PRAF2/ACSL4	37	Module 5
GO:1903034	regulation of response to wounding	24/943	183/18866	1.48731e-05	0.000296909	0.000229135	FCER1G/DUSP10/ALOX5/PLAU/PRKCQ/UBASH3B/THBS1/ANXA2/PLAUR/PLEK/CXCR4/CLDN1/SPP1/TXK/TEC/HPSE/F2RL1/CD109/TNFAIP3/ADTRP/CD36/LYN/PLAT/SYK	24	Module 5
GO:0048285	organelle fission	46/943	476/18866	1.50863e-05	0.000300049	0.000231558	CDC14A/NUF2/CENPF/HORMAD1/ASPM/KIF14/CDK1/KIF11/MKI67/BNIP3/CHEK1/KIF18A/CDKN1B/RACGAP1/IGF1/TDRD9/DDHD1/DLGAP5/BUB1B/NUSAP1/CCNB2/PRC1/TOP2A/BRIP1/NDC80/NCAPH/BCL2L11/SGO2/CD28/BUB1/IL1B/TPX2/DSN1/CHEK2/DMC1/FANCD2/NCAPG/CENPE/CCNB1/CENPK/TTK/MTFR2/ANLN/NCAPG2/CCNE2/KIF4A	46	Module 5
GO:0009306	protein secretion	45/943	462/18866	1.53033e-05	0.000303242	0.000234022	FCGR2B/PFKFB2/NLRP3/SLC2A1/GLUL/TLR5/ALOX5/PSAP/ARNTL/NR1H3/CRTAM/CADM1/P2RX7/ITPR2/GNPTAB/IGF1/HIF1A/MYO5A/NOD2/TMEM106A/CCL5/RAB8A/CD33/VSNL1/RAB10/PLEK/IL1RN/IL1B/DPP4/SNAP25/TIAM1/MTTP/TLR6/VEGFC/PTGER4/F2RL1/LCP2/BTN3A1/ADTRP/TREM2/ADAM9/LYN/PCSK5/SYK/ACSL4	45	Module 5
GO:1905954	positive regulation of lipid localization	16/943	94/18866	1.56297e-05	0.000308572	0.000238135	ACSL5/NR1H3/P2RX7/P2RX4/LPCAT3/ANXA2/MAP2K6/IL1B/PLTP/OSBPL11/SPP1/CD36/LPL/MSR1/PLIN2/ABCA1	16	Module 5
GO:0006911	phagocytosis engulfment	19/943	126/18866	1.58077e-05	0.000310942	0.000239965	FCER1G/FCGR2B/NCKAP1L/BIN2/THBS1/CD300A/ARHGAP25/MARCO/ITGB2/RAC2/PPARG/ITGA2/F2RL1/HAVCR1/TREM2/CD36/ELMO1/MSR1/ABCA1	19	Module 5
GO:0035592	establishment of protein localization to extracellular region	45/943	463/18866	1.61559e-05	0.000315895	0.000243787	FCGR2B/PFKFB2/NLRP3/SLC2A1/GLUL/TLR5/ALOX5/PSAP/ARNTL/NR1H3/CRTAM/CADM1/P2RX7/ITPR2/GNPTAB/IGF1/HIF1A/MYO5A/NOD2/TMEM106A/CCL5/RAB8A/CD33/VSNL1/RAB10/PLEK/IL1RN/IL1B/DPP4/SNAP25/TIAM1/MTTP/TLR6/VEGFC/PTGER4/F2RL1/LCP2/BTN3A1/ADTRP/TREM2/ADAM9/LYN/PCSK5/SYK/ACSL4	45	Module 5
GO:0000819	sister chromatid segregation	25/943	196/18866	1.61771e-05	0.000315895	0.000243787	NUF2/CENPF/HORMAD1/KIF14/KIF18A/RACGAP1/DLGAP5/BUB1B/NUSAP1/PRC1/TOP2A/AXIN2/NDC80/NCAPH/SGO2/BUB1/DSN1/NCAPG/CENPE/CCNB1/CENPK/TTK/NCAPG2/ESCO2/KIF4A	25	Module 5
GO:0098813	nuclear chromosome segregation	31/943	272/18866	1.66617e-05	0.000324179	0.00025018	NUF2/CENPF/HORMAD1/KIF14/KIF18A/RACGAP1/DLGAP5/BUB1B/KNL1/NUSAP1/PRC1/TOP2A/BRIP1/AXIN2/NDC80/NCAPH/SGO2/BUB1/DSN1/DMC1/FANCD2/ECT2/NCAPG/CENPE/CCNB1/CENPK/TTK/NCAPG2/ESCO2/CCNE2/KIF4A	31	Module 5
GO:0015849	organic acid transport	37/943	353/18866	1.78147e-05	0.000345361	0.000266527	LRRC8C/LRRC8D/KMO/SLC2A1/ACSL5/PSAP/SLC16A12/FOLR2/SLCO2B1/P2RX7/P2RX4/ABCC4/SLC7A7/THBS1/AQP9/SLC7A6/SLC47A1/MAP2K6/SLC16A6/SLC11A1/IL1B/SNAP25/PPARG/SLC6A6/SLC25A38/ACSL1/SLC1A3/SLC36A1/EMB/SLC16A10/CD36/SLC26A5/SYK/PLIN2/XK/PRAF2/ACSL4	37	Module 5
GO:0010743	regulation of macrophage derived foam cell differentiation	9/943	32/18866	1.8552e-05	0.000357076	0.000275567	NR1H3/IL18/PRKCH/PPARG/AGTR1/CD36/LPL/MSR1/ABCA1	9	Module 5
GO:0050869	negative regulation of B cell activation	9/943	32/18866	1.8552e-05	0.000357076	0.000275567	FCGR2B/CD300A/TYROBP/INPP5D/SAMSN1/TNFAIP3/TNFRSF21/LYN/BTK	9	Module 5
GO:0052547	regulation of peptidase activity	45/943	466/18866	1.89832e-05	0.00036407	0.000280965	CR1/NLRP3/AIM2/BIRC3/CASP1/PEBP1/LGMN/SERPINA1/THBS1/ANXA2/CTSH/MALT1/SERPINB8/SPINT2/BST2/PLAUR/CARD8/BCL2L11/TANK/CASP10/NLRC4/COL6A3/MMP9/CSTB/PPARG/PAK2/RARRES1/SNCA/LEF1/SFRP2/VEGFA/CD109/SERPINB1/SERPINB9/AKIRIN2/FYN/LYN/RIPK2/MYC/TNFRSF10A/ST18/DAPK1/SYK/TNFSF15/AIFM1	45	Module 5
GO:0060100	positive regulation of phagocytosis engulfment	6/943	13/18866	1.94535e-05	0.000370444	0.000285885	NCKAP1L/PPARG/ITGA2/F2RL1/TREM2/CD36	6	Module 5
GO:1905155	positive regulation of membrane invagination	6/943	13/18866	1.94535e-05	0.000370444	0.000285885	NCKAP1L/PPARG/ITGA2/F2RL1/TREM2/CD36	6	Module 5
GO:0050691	regulation of defense response to virus by host	10/943	40/18866	1.9972e-05	0.000378974	0.000292467	PTPN22/AIM2/MMP12/LILRB1/IL1B/STAT1/APOBEC3F/APOBEC3G/DTX3L/TNFAIP3	10	Module 5
GO:0007162	negative regulation of cell adhesion	33/943	301/18866	2.01578e-05	0.000381152	0.000294148	FCGR2B/XCL1/PTPRC/PTPN22/MYOC/IL2RA/UBASH3B/CRTAM/LPXN/MMP12/PLXNC1/ARHGDIB/LGALS3/THBS1/ADAM10/CD300A/CLDN7/SPINT2/LILRB1/LILRB2/IL1RN/CYP1B1/PELI1/CD86/CD80/IRF1/HAVCR2/VEGFA/ADTRP/TNFRSF21/GPNMB/PAG1/VSIG4	33	Module 5
GO:2001056	positive regulation of cysteine-type endopeptidase activity	21/943	151/18866	2.05295e-05	0.000386819	0.000298521	NLRP3/AIM2/CASP1/LGMN/CTSH/MALT1/CARD8/BCL2L11/CASP10/NLRC4/PPARG/SNCA/FYN/RIPK2/MYC/TNFRSF10A/ST18/DAPK1/SYK/TNFSF15/AIFM1	21	Module 5
GO:0033077	T cell differentiation in thymus	14/943	76/18866	2.0919e-05	0.000392779	0.000303121	PTPRC/CD3E/CD3G/TESPA1/RASGRP1/CD28/ADAM17/IL1B/MAFB/IL7R/CAMK4/DOCK2/VNN1/TOX	14	Module 5
GO:0006665	sphingolipid metabolic process	22/943	163/18866	2.12191e-05	0.000397027	0.000306399	PPT1/SGPL1/PSAP/ACER3/P2RX7/SGPP1/SPTLC2/HEXA/ORMDL3/B3GALT1/SUMF1/GLB1/HEXB/GM2A/SERINC5/ST8SIA4/ITGB8/CLN8/ASAH1/NSMAF/UGCG/GLA	22	Module 5
GO:0050868	negative regulation of T cell activation	18/943	118/18866	2.23719e-05	0.000417143	0.000321923	FCGR2B/XCL1/PTPN22/IL2RA/CRTAM/LGALS3/CD300A/LILRB1/LILRB2/PELI1/CD86/CD80/IRF1/HAVCR2/TNFRSF21/GPNMB/PAG1/VSIG4	18	Module 5
GO:0050918	positive chemotaxis	13/943	67/18866	2.30119e-05	0.000427591	0.000329986	NRP1/PTPRJ/LGALS3/IL16/CORO1A/CCL5/CCL3/CXCL10/VEGFC/ITGA2/F2RL1/VEGFA/GPNMB	13	Module 5
GO:0045058	T cell selection	11/943	49/18866	2.32636e-05	0.000430777	0.000332445	PTPRC/SLAMF6/CD3E/CD3G/CD4/CD28/DOCK2/THEMIS/TOX/CTSL/SYK	11	Module 5
GO:0071692	protein localization to extracellular region	45/943	470/18866	2.34622e-05	0.00043167	0.000333134	FCGR2B/PFKFB2/NLRP3/SLC2A1/GLUL/TLR5/ALOX5/PSAP/ARNTL/NR1H3/CRTAM/CADM1/P2RX7/ITPR2/GNPTAB/IGF1/HIF1A/MYO5A/NOD2/TMEM106A/CCL5/RAB8A/CD33/VSNL1/RAB10/PLEK/IL1RN/IL1B/DPP4/SNAP25/TIAM1/MTTP/TLR6/VEGFC/PTGER4/F2RL1/LCP2/BTN3A1/ADTRP/TREM2/ADAM9/LYN/PCSK5/SYK/ACSL4	45	Module 5
GO:0035710	CD4-positive alpha-beta T cell activation	16/943	97/18866	2.34725e-05	0.00043167	0.000333134	XCL1/NLRP3/SLAMF6/PRKCQ/IL18/NCKAP1L/TMEM98/MALT1/CD86/CD80/LEF1/PTGER4/CD83/RIPK2/TOX/CTSL	16	Module 5
GO:0002833	positive regulation of response to biotic stimulus	29/943	251/18866	2.39227e-05	0.000438448	0.000338365	PYHIN1/FCER1G/GBP5/NRAS/AIM2/SLAMF6/CRTAM/PAK1/MMP12/CADM1/RASGRP1/SCIMP/CCL5/MALT1/CD226/VAV1/IL18RAP/NLRC4/HCK/PAK2/TXK/F2RL1/CD180/HAVCR2/FYN/LYN/RIPK2/SYK/SH2D1A	29	Module 5
GO:0030149	sphingolipid catabolic process	9/943	33/18866	2.43839e-05	0.00044538	0.000343715	PPT1/SGPL1/PSAP/ACER3/HEXA/HEXB/GM2A/ASAH1/GLA	9	Module 5
GO:0031589	cell-substrate adhesion	37/943	359/18866	2.57909e-05	0.000469481	0.000362314	MYOC/KIF14/PLAU/NRP1/PTPRJ/CD3E/LPXN/MMP12/ITGB7/NID2/THBS1/FMN1/CORO1A/ITGAL/SKAP1/PECAM1/LIMS1/BCL2L11/MERTK/ITGA6/ITGA4/STK4/CASS4/TIAM1/ITGB2/PARVG/RAC2/CD96/ADAMTS9/PIK3CB/HPSE/ITGA2/VEGFA/CD36/MYO1G/ADAM9/PRKX	37	Module 5
GO:0090025	regulation of monocyte chemotaxis	8/943	26/18866	2.63921e-05	0.00047719	0.000368263	SLAMF8/LGMN/CCL5/CCR2/CCR1/CXCL10/PLA2G7/LYN	8	Module 5
GO:1905523	positive regulation of macrophage migration	8/943	26/18866	2.63921e-05	0.00047719	0.000368263	P2RX4/C3AR1/THBS1/CCL5/CCL3/C5AR1/CSF1R/TREM2	8	Module 5
GO:0002262	myeloid cell homeostasis	21/943	154/18866	2.77423e-05	0.000498488	0.0003847	PDE4B/FCER1G/AMPD3/NCKAP1L/SLC11A2/HIF1A/BCL2L11/MERTK/INPP5D/ADAM17/STAT1/MAFB/SLC25A38/CCR2/HCLS1/PIK3CB/VEGFA/IKZF1/NCAPG2/LYN/PTBP3	21	Module 5
GO:0051924	regulation of calcium ion transport	29/943	253/18866	2.77557e-05	0.000498488	0.0003847	PDE4B/XCL1/CD84/UBASH3B/TRPC6/CD4/P2RX7/P2RX4/ATP2B1/LGALS3/CEMIP/IL16/MYO5A/CORO1A/CCL5/CCL3/CD33/LILRB1/LILRB2/CXCR4/CCR1/CXCL10/CXCL11/SNCA/FYN/PIK3CG/LYN/CHD7/JPH1	29	Module 5
GO:0014068	positive regulation of phosphatidylinositol 3-kinase signaling	15/943	88/18866	2.81175e-05	0.000501594	0.000387097	MYOC/PIK3AP1/PRR5L/CBL/IL18/IGF1/FLT1/CCL5/CD28/HCLS1/PIK3CB/F2RL1/FYN/PIK3CG/LYN	15	Module 5
GO:0002440	production of molecular mediator of immune response	33/943	306/18866	2.8192e-05	0.000501594	0.000387097	FCER1G/FCGR2B/XCL1/PTPRC/EXO1/NLRP3/PTPN22/CD244/DENND1B/IL18/LACC1/NOD2/SCIMP/MALT1/CD226/LILRB1/BST2/IL18RAP/CD28/SLC11A1/IL1B/SAMHD1/CCR2/CD96/CD86/POLQ/TFRC/IL7R/GAPT/F2RL1/HLA-DQB1/CD36/BTK	33	Module 5
GO:0043281	regulation of cysteine-type endopeptidase activity involved in apoptotic process	26/943	215/18866	2.83688e-05	0.000501594	0.000387097	NLRP3/BIRC3/CASP1/THBS1/CTSH/MALT1/PLAUR/CARD8/BCL2L11/CASP10/NLRC4/MMP9/PPARG/PAK2/SNCA/LEF1/SFRP2/VEGFA/SERPINB9/MYC/TNFRSF10A/ST18/DAPK1/SYK/TNFSF15/AIFM1	26	Module 5
GO:0070374	positive regulation of ERK1 and ERK2 cascade	26/943	215/18866	2.83688e-05	0.000501594	0.000387097	XCL1/PTPRC/PTPN22/CHI3L1/NRP1/CD4/PDE8A/RASGRP1/NOD2/CCL8/CCL18/SCIMP/CCL5/CCL3/C5AR1/MARCO/CCR1/HAND2/F2RL1/CSF1R/HAVCR2/TREM2/GPNMB/CD36/RIPK2/ADRA1A	26	Module 5
GO:0043367	CD4-positive alpha-beta T cell differentiation	14/943	78/18866	2.83956e-05	0.000501594	0.000387097	NLRP3/SLAMF6/IL18/NCKAP1L/TMEM98/MALT1/CD86/CD80/LEF1/PTGER4/CD83/RIPK2/TOX/CTSL	14	Module 5
GO:0046850	regulation of bone remodeling	11/943	50/18866	2.84905e-05	0.000501619	0.000387116	GPR137B/UBASH3B/P2RX7/INPP5D/TFRC/SPP1/CSF1R/TNFAIP3/CA2/DCSTAMP/SYK	11	Module 5
GO:0010324	membrane invagination	20/943	143/18866	2.9514e-05	0.000517941	0.000399713	FCER1G/FCGR2B/NCKAP1L/BIN2/THBS1/CD300A/ARHGAP25/MARCO/ITGB2/RAC2/PPARG/ITGA2/FCHO2/F2RL1/HAVCR1/TREM2/CD36/ELMO1/MSR1/ABCA1	20	Module 5
GO:0048246	macrophage chemotaxis	10/943	42/18866	3.16554e-05	0.000553712	0.000427318	SLAMF8/C3AR1/EDNRB/LGALS3/THBS1/NUP85/CCL5/CCL3/C5AR1/CSF1R	10	Module 5
GO:0002827	positive regulation of T-helper 1 type immune response	7/943	20/18866	3.32988e-05	0.000578687	0.000446592	XCL1/IL18/SLC11A1/IL1B/CCR2/CD80/RIPK2	7	Module 5
GO:0034138	toll-like receptor 3 signaling pathway	7/943	20/18866	3.32988e-05	0.000578687	0.000446592	PTPN22/SCIMP/COLEC12/PELI1/F2RL1/HAVCR2/TNFAIP3	7	Module 5
GO:0032653	regulation of interleukin-10 production	12/943	60/18866	3.44004e-05	0.000595903	0.000459879	FCER1G/FCGR2B/XCL1/MMP8/NOD2/LILRB1/TYROBP/CD28/CD83/TREM2/TNFRSF21/SYK	12	Module 5
GO:0002825	regulation of T-helper 1 type immune response	8/943	27/18866	3.58685e-05	0.000617352	0.000476431	XCL1/IL18/SLC11A1/IL1B/CCR2/CD80/HAVCR2/RIPK2	8	Module 5
GO:0036037	CD8-positive alpha-beta T cell activation	8/943	27/18866	3.58685e-05	0.000617352	0.000476431	XCL1/PTPN22/CRTAM/NCKAP1L/LILRB1/IRF1/TOX/TNFSF8	8	Module 5
GO:0002431	Fc receptor mediated stimulatory signaling pathway	20/943	145/18866	3.61786e-05	0.0006207	0.000479015	FCER1G/FCGR2A/FCGR2B/PTPRC/VAV3/FCGR3A/PTPRJ/CD3G/PAK1/NCKAP1L/ARPC3/CD226/VAV1/HCK/PIK3CB/FYN/ELMO1/MYO1G/LYN/SYK	20	Module 5
GO:0052126	movement in host environment	22/943	169/18866	3.73854e-05	0.000639362	0.000493417	CR1/MRC1/CDK1/IFITM1/CBL/CD4/ITGB7/SELPLG/TRIM25/NPC1/CXCR4/DPP4/CXADR/CD86/CD80/CLDN1/TFRC/ITGA2/HAVCR1/WWP1/CTSB/CTSL	22	Module 5
GO:0050856	regulation of T cell receptor signaling pathway	10/943	43/18866	3.94156e-05	0.000671943	0.000518561	PTPN22/PTPRJ/TESPA1/ELF1/LGALS3/CD300A/MALT1/CD226/TRAT1/SH2D1A	10	Module 5
GO:0051607	defense response to virus	29/943	258/18866	3.98923e-05	0.000677917	0.000523172	PTPRC/NLRP3/PTPN22/AIM2/IL2RA/BNIP3/IFITM1/BIRC3/MMP12/RNASE6/MLKL/SLFN11/RNF125/LILRB1/BST2/IL1B/STAT1/SAMHD1/IFNAR2/APOBEC3D/APOBEC3F/APOBEC3G/ATG7/DTX3L/CXCL10/F2RL1/SERINC5/IRF1/TNFAIP3	29	Module 5
GO:0099024	plasma membrane invagination	19/943	135/18866	4.24162e-05	0.000718533	0.000554516	FCER1G/FCGR2B/NCKAP1L/BIN2/THBS1/CD300A/ARHGAP25/MARCO/ITGB2/RAC2/PPARG/ITGA2/F2RL1/HAVCR1/TREM2/CD36/ELMO1/MSR1/ABCA1	19	Module 5
GO:1905952	regulation of lipid localization	22/943	171/18866	4.48337e-05	0.000757097	0.000584277	ACSL5/NR1H3/P2RX7/P2RX4/LPCAT3/OSBPL8/THBS1/ANXA2/MAP2K6/APOC1/IL1B/PLTP/PPARG/AGTR1/OSBPL11/SPP1/CD36/LPL/MSR1/SYK/PLIN2/ABCA1	22	Module 5
GO:0033630	positive regulation of cell adhesion mediated by integrin	7/943	21/18866	4.7799e-05	0.000802127	0.000619029	CD3E/NCKAP1L/CCL5/SKAP1/SFRP2/ADAM9/SYK	7	Module 5
GO:0046514	ceramide catabolic process	7/943	21/18866	4.7799e-05	0.000802127	0.000619029	PSAP/ACER3/HEXA/HEXB/GM2A/ASAH1/GLA	7	Module 5
GO:0034113	heterotypic cell-cell adhesion	12/943	62/18866	4.84354e-05	0.000807879	0.000623468	CD2/PTPRC/ITGB7/SKAP1/DSC2/LILRB2/IL1RN/ITGA4/IL1B/CXADR/ITGB2/CD200R1	12	Module 5
GO:0033003	regulation of mast cell activation	10/943	44/18866	4.87435e-05	0.000807879	0.000623468	FCER1G/CD84/C12orf4/CD300A/CD226/ADGRE2/RAC2/HAVCR1/LYN/SYK	10	Module 5
GO:0097028	dendritic cell differentiation	10/943	44/18866	4.87435e-05	0.000807879	0.000623468	FCGR2B/LILRB1/LILRB2/F2RL1/CAMK4/TREM2/TMEM176A/TMEM176B/LYN/DCSTAMP	10	Module 5
GO:1905521	regulation of macrophage migration	10/943	44/18866	4.87435e-05	0.000807879	0.000623468	SLAMF8/P2RX4/C3AR1/THBS1/CCL5/CCL3/C5AR1/CD200R1/CSF1R/TREM2	10	Module 5
GO:0045862	positive regulation of proteolysis	37/943	370/18866	4.93517e-05	0.000815443	0.000629305	PYHIN1/CR1/NLRP3/AIM2/SPON1/CTSC/CASP1/LPCAT3/PRICKLE1/LGMN/CTSH/NUPR1/MALT1/CARD8/BCL2L11/TANK/CASP10/NLRC4/IL1B/PPARG/SNCA/SFRP2/DAB2/RNF144B/TREM2/AKIRIN2/FYN/ADAM9/LYN/RIPK2/MYC/TNFRSF10A/ST18/DAPK1/SYK/TNFSF15/AIFM1	37	Module 5
GO:0032645	regulation of granulocyte macrophage colony-stimulating factor production	6/943	15/18866	5.20413e-05	0.000853004	0.000658292	CD84/IL18/RASGRP1/IL1B/CD80/SYK	6	Module 5
GO:0034134	toll-like receptor 2 signaling pathway	6/943	15/18866	5.20413e-05	0.000853004	0.000658292	PIK3AP1/TLR6/F2RL1/TNFAIP3/LYN/RIPK2	6	Module 5
GO:1903038	negative regulation of leukocyte cell-cell adhesion	19/943	137/18866	5.21016e-05	0.000853004	0.000658292	FCGR2B/XCL1/PTPN22/IL2RA/CRTAM/LGALS3/CD300A/LILRB1/LILRB2/PELI1/CD86/CD80/IRF1/HAVCR2/ADTRP/TNFRSF21/GPNMB/PAG1/VSIG4	19	Module 5
GO:0000070	mitotic sister chromatid segregation	21/943	161/18866	5.40953e-05	0.000882954	0.000681406	NUF2/CENPF/KIF14/KIF18A/RACGAP1/DLGAP5/BUB1B/NUSAP1/PRC1/NDC80/NCAPH/SGO2/BUB1/DSN1/NCAPG/CENPE/CCNB1/CENPK/TTK/NCAPG2/KIF4A	21	Module 5
GO:0043406	positive regulation of MAP kinase activity	29/943	264/18866	6.06736e-05	0.000986737	0.000761498	PTPRC/MAP3K8/CDK1/PAK1/P2RX7/DUSP6/IGF1/TAOK3/FLT1/THBS1/RASGRP1/NOD2/MLKL/MAP2K6/C5AR1/FPR1/IL1B/CXCR4/TIAM1/PIK3CB/TLR6/MAP3K1/VEGFA/PIK3CG/EZH2/ADAM9/RIPK2/PBK/SYK	29	Module 5
GO:0014066	regulation of phosphatidylinositol 3-kinase signaling	18/943	127/18866	6.09347e-05	0.000986737	0.000761498	MYOC/CEP55/PIK3AP1/PRR5L/CBL/IL18/IGF1/FLT1/RASGRP1/CCL5/CD28/HCLS1/PIK3CB/F2RL1/FYN/PIK3CG/TWIST1/LYN	18	Module 5
GO:0051701	interaction with host	25/943	212/18866	6.1005e-05	0.000986737	0.000761498	CR1/MRC1/CDK1/IFITM1/CBL/CD4/ITGB7/SELPLG/TRIM25/NPC1/BCL2L11/CXCR4/DPP4/CXADR/ATG7/CD86/CD80/CLDN1/TFRC/ITGA2/HAVCR1/SERPINB9/WWP1/CTSB/CTSL	25	Module 5
GO:0002717	positive regulation of natural killer cell mediated immunity	8/943	29/18866	6.34331e-05	0.00101079	0.00078006	SLAMF6/CRTAM/CADM1/RASGRP1/CD226/VAV1/IL18RAP/SH2D1A	8	Module 5
GO:0036336	dendritic cell migration	8/943	29/18866	6.34331e-05	0.00101079	0.00078006	SLAMF8/ALOX5/CCL5/CXCR4/CCR2/CCR1/PIK3CG/DOCK8	8	Module 5
GO:0043032	positive regulation of macrophage activation	8/943	29/18866	6.34331e-05	0.00101079	0.00078006	CTSC/MMP8/THBS1/CCL3/MIR142/TLR6/HAVCR2/TREM2	8	Module 5
GO:0050690	regulation of defense response to virus by virus	8/943	29/18866	6.34331e-05	0.00101079	0.00078006	CD4/CD28/HCK/PAK2/DOCK2/FYN/ELMO1/ATP6V1H	8	Module 5
GO:0050855	regulation of B cell receptor signaling pathway	8/943	29/18866	6.34331e-05	0.00101079	0.00078006	FCGR2B/PTPN22/LPXN/ELF1/PRKCH/CD300A/GCSAM/LYN	8	Module 5
GO:2000377	regulation of reactive oxygen species metabolic process	24/943	200/18866	6.43641e-05	0.00102259	0.000789167	ALOX5/BNIP3/PRCP/MMP8/P2RX4/HIF1A/THBS1/TMEM106A/BRCA1/ACP5/TYROBP/HK2/CYP1B1/IL1B/ITGB2/RAC2/AGTR1/TLR6/SNCA/F2RL1/FYN/CD36/SYK/GLA	24	Module 5
GO:0051656	establishment of organelle localization	41/943	432/18866	6.51097e-05	0.00103138	0.000795953	GPSM2/FCER1G/NUF2/CENPF/CNIH3/CD84/KIF14/WDR11/BLOC1S2/CBL/KIF18A/CTSC/C12orf4/HIF1A/DLGAP5/SERPINA1/CLMN/NUSAP1/RASGRP1/MYO5A/MYO1E/TANC2/CD300A/NDC80/MYO1F/ADGRE2/KIF5C/ITGA4/MREG/TRAPPC10/SNAP29/RAC2/ANKRD28/CENPE/CCNB1/SNAP91/PIK3CG/MYO1G/LYN/SYK/BTK	41	Module 5
GO:0045089	positive regulation of innate immune response	25/943	213/18866	6.59132e-05	0.00104104	0.000803406	PYHIN1/FCER1G/GBP5/NRAS/AIM2/SLAMF6/CRTAM/PAK1/MMP12/CADM1/RASGRP1/CCL5/MALT1/CD226/VAV1/IL18RAP/NLRC4/HCK/PAK2/TXK/HAVCR2/FYN/LYN/SYK/SH2D1A	25	Module 5
GO:0051383	kinetochore organization	7/943	22/18866	6.70911e-05	0.00105163	0.000811576	NUF2/CENPF/DLGAP5/CENPN/NDC80/CENPE/CENPK	7	Module 5
GO:0042130	negative regulation of T cell proliferation	12/943	64/18866	6.7171e-05	0.00105163	0.000811576	XCL1/IL2RA/CRTAM/LILRB1/LILRB2/PELI1/CD86/CD80/HAVCR2/TNFRSF21/GPNMB/VSIG4	12	Module 5
GO:2000401	regulation of lymphocyte migration	12/943	64/18866	6.7171e-05	0.00105163	0.000811576	XCL1/ADAM10/CCL5/CCL3/ITGA4/ADAM17/CCR2/GCSAM/CD200R1/CXCL10/ADTRP/DOCK8	12	Module 5
GO:0014013	regulation of gliogenesis	18/943	128/18866	6.76552e-05	0.00105613	0.00081505	DUSP10/CDK1/P2RX4/PRKCH/DICER1/TMEM98/CCL3/MIR142/DLX1/IL1B/CXCR4/TIAM1/PPARG/CCR2/TREM2/TNFRSF21/EZH2/LYN	18	Module 5
GO:0034612	response to tumor necrosis factor	33/943	320/18866	6.8535e-05	0.00106289	0.000820266	XCL1/TNFRSF9/AIM2/CHI3L1/BIRC3/CASP4/CASP1/THBS1/ADAM10/CCL8/CCL18/CXCL16/CCL5/CCL3/BRCA1/MIR142/CARD8/LIMS1/TANK/ADAM17/AFF3/STAT1/CLDN1/F2RL1/TNFAIP3/TNFRSF21/ADAM9/DCSTAMP/ASAH1/ST18/SYK/TNFSF15/TNFSF8	33	Module 5
GO:0032102	negative regulation of response to external stimulus	41/943	433/18866	6.85528e-05	0.00106289	0.000820266	SLAMF8/FCGR2B/PTPRC/CR1/NLRP3/DUSP10/ALOX5/PLAU/IL2RA/NRP1/NR1H3/UBASH3B/MMP12/LPCAT3/IGF1/THBS1/ANXA2/MIR142/RNF125/LILRB1/ACP5/PLAUR/CARD8/NMI/DPP4/SAMHD1/PPARG/CD96/CD200R1/SPP1/PTGER4/HAVCR2/CD109/TNFAIP3/SERPINB9/ADTRP/AOAH/SEMA3A/PBK/PLAT/VSIG4	41	Module 5
GO:0034121	regulation of toll-like receptor signaling pathway	13/943	74/18866	6.86819e-05	0.00106289	0.000820266	PTPN22/TLR5/NR1H3/BIRC3/CD300A/PELI1/TLR6/F2RL1/IRF1/TNFAIP3/CD36/LYN/RAB7B	13	Module 5
GO:0009615	response to virus	35/943	349/18866	7.37924e-05	0.00113869	0.000878768	XCL1/PTPRC/NLRP3/PTPN22/AIM2/IL2RA/BNIP3/IFITM1/BIRC3/MMP12/RNASE6/MLKL/CCL8/SLFN11/CCL5/RNF125/LILRB1/BST2/IL1B/CXCR4/STAT1/SAMHD1/IFNAR2/IFNGR2/APOBEC3D/APOBEC3F/APOBEC3G/ATG7/DTX3L/CXCL10/F2RL1/SERINC5/IRF1/TNFAIP3/IFNGR1	35	Module 5
GO:0030101	natural killer cell activation	14/943	85/18866	7.61612e-05	0.00117188	0.000904379	CD2/SLAMF7/PTPRC/PTPN22/CD244/IL18/RASGRP1/CORO1A/TYROBP/MERTK/ITGB2/HAVCR2/PRDM1/TOX	14	Module 5
GO:0006687	glycosphingolipid metabolic process	12/943	65/18866	7.86803e-05	0.00120374	0.000928967	PSAP/HEXA/B3GALT1/SUMF1/GLB1/HEXB/GM2A/ST8SIA4/ITGB8/ASAH1/UGCG/GLA	12	Module 5
GO:0048247	lymphocyte chemotaxis	12/943	65/18866	7.86803e-05	0.00120374	0.000928967	XCL1/ADAM10/CCL8/CCL18/CXCL16/CCL5/CCL3/ADAM17/CCR2/CXCL10/CXCL11/PIK3CG	12	Module 5
GO:0032418	lysosome localization	13/943	75/18866	7.93345e-05	0.0012103	0.00093403	FCER1G/CD84/BLOC1S2/CBL/C12orf4/RASGRP1/CD300A/ADGRE2/RAC2/PIK3CG/LYN/SYK/BTK	13	Module 5
GO:0032604	granulocyte macrophage colony-stimulating factor production	6/943	16/18866	7.97494e-05	0.00121318	0.000936256	CD84/IL18/RASGRP1/IL1B/CD80/SYK	6	Module 5
GO:2000403	positive regulation of lymphocyte migration	9/943	38/18866	8.22841e-05	0.00124765	0.000962851	XCL1/ADAM10/CCL5/CCL3/ITGA4/ADAM17/CCR2/CXCL10/DOCK8	9	Module 5
GO:0051897	positive regulation of protein kinase B signaling	22/943	178/18866	8.24795e-05	0.00124765	0.000962851	MYOC/CHI3L1/PIK3AP1/PTPRJ/IL18/P2RX4/OSBPL8/F10/THBS1/CCL3/VAV1/CD28/ICOS/RAC2/TRAT1/CD86/CD80/HCLS1/PIK3CB/HPSE/FYN/PIK3CG	22	Module 5
GO:0043372	positive regulation of CD4-positive alpha-beta T cell differentiation	8/943	30/18866	8.27335e-05	0.00124797	0.000963104	NLRP3/IL18/NCKAP1L/MALT1/CD86/CD80/CD83/RIPK2	8	Module 5
GO:0038094	Fc-gamma receptor signaling pathway	19/943	142/18866	8.54046e-05	0.00128466	0.000991413	FCER1G/FCGR2A/FCGR2B/PTPRC/VAV3/FCGR3A/PTPRJ/CD3G/PAK1/NCKAP1L/ARPC3/VAV1/HCK/PIK3CB/FYN/ELMO1/MYO1G/LYN/SYK	19	Module 5
GO:0022408	negative regulation of cell-cell adhesion	23/943	191/18866	8.59731e-05	0.0012896	0.000995225	FCGR2B/XCL1/PTPN22/IL2RA/UBASH3B/CRTAM/LGALS3/CD300A/SPINT2/LILRB1/LILRB2/IL1RN/PELI1/CD86/CD80/IRF1/HAVCR2/VEGFA/ADTRP/TNFRSF21/GPNMB/PAG1/VSIG4	23	Module 5
GO:0070228	regulation of lymphocyte apoptotic process	11/943	56/18866	8.63251e-05	0.00129127	0.000996516	PRKCQ/CD3G/P2RX7/LGALS3/HIF1A/CCL5/IL7R/GIMAP8/LYN/DOCK8/BTK	11	Module 5
GO:0046638	positive regulation of alpha-beta T cell differentiation	10/943	47/18866	8.87753e-05	0.00132423	0.00102195	NLRP3/IL18/NCKAP1L/PNP/MALT1/CD86/CD80/CD83/RIPK2/SYK	10	Module 5
GO:0071496	cellular response to external stimulus	33/943	326/18866	9.81344e-05	0.00145978	0.00112656	PTPRC/SLC2A1/GLUL/TLR5/BNIP3/FOLR2/CBL/CHEK1/MMP7/CASP5/CASP1/P2RX7/ATP2B1/CD68/BRIP1/DSC2/ITGA6/ITGA4/IL1B/MAP1LC3A/ATG7/PPARG/SFRP2/PTGER4/ITGA2/MAP3K1/CPEB4/IRF1/TRIM24/LPL/LYN/TNFRSF10A/AIFM1	33	Module 5
GO:0010212	response to ionizing radiation	19/943	144/18866	0.000103282	0.00153211	0.00118238	PTPRC/CBL/XRRA1/RAD51AP1/BLM/DCUN1D3/RFWD3/BRCA1/RHOB/TANK/NABP1/CHEK2/DMC1/FANCD2/ECT2/TOPBP1/CXCL10/SFRP2/MYC	19	Module 5
GO:0019058	viral life cycle	34/943	341/18866	0.000104169	0.00154102	0.00118926	CR1/MRC1/CDK1/IFITM1/CD4/ITGB7/SELPLG/CCNK/CCL8/NUP85/CCL5/TOP2A/TRIM25/NEDD4L/NPC1/BST2/CD28/CXCR4/DPP4/CXADR/APOBEC3D/APOBEC3F/APOBEC3G/CXCR6/CD86/CD80/CLDN1/TFRC/ITGA2/HAVCR1/WWP1/CTSB/PCSK5/CTSL	34	Module 5
GO:0019932	second-messenger-mediated signaling	42/943	456/18866	0.000104505	0.00154173	0.00118981	RCAN3/PTPRC/PTPRJ/CD3E/CD4/P2RX7/P2RX4/ITPR2/IGF1/EDNRB/GNG2/THBS1/MCTP2/MYO5A/CALML4/CCL3/ADGRE1/ADGRE2/FPR1/PLEK/RAMP1/CXCR4/CXCR6/CCR2/TRAT1/AGTR1/CCR1/CXCL10/CXCL11/PTGER4/MCTP1/VEGFA/ADGRG6/TREM2/CD36/ADRA1A/PDE7A/JPH1/SYK/ABCA1/ADGRG2/BTK	42	Module 5
GO:0070838	divalent metal ion transport	43/943	471/18866	0.000105972	0.00155909	0.0012032	GJA4/PDE4B/XCL1/PTPRC/CD84/UBASH3B/TRPC6/CD4/P2RX7/P2RX4/ITPR2/SLC11A2/ATP2B1/LGALS3/SLC24A4/ERO1A/CEMIP/IL16/MYO5A/ANXA2/CORO1A/PKD1L3/CCL8/CCL5/CCL3/SLC39A11/CD33/LILRB1/LILRB2/SLC11A1/RAMP1/CXCR4/CCR1/CXCL10/CXCL11/SNCA/SLC39A8/FYN/PIK3CG/LYN/CHD7/ADRA1A/JPH1	43	Module 5
GO:0050858	negative regulation of antigen receptor-mediated signaling pathway	8/943	31/18866	0.000106658	0.00156064	0.0012044	FCGR2B/PTPN22/PTPRJ/LPXN/ELF1/LGALS3/CD300A/SH2D1A	8	Module 5
GO:2000406	positive regulation of T cell migration	8/943	31/18866	0.000106658	0.00156064	0.0012044	XCL1/ADAM10/CCL5/ITGA4/ADAM17/CCR2/CXCL10/DOCK8	8	Module 5
GO:0090382	phagosome maturation	10/943	48/18866	0.000107167	0.00156382	0.00120686	SLAMF8/RAB39A/P2RX7/CORO1A/ATP6V0A1/MREG/ATP6V1A/ATP6V0D2/ATP6V1H/RAB7B	10	Module 5
GO:0031098	stress-activated protein kinase signaling cascade	31/943	300/18866	0.000108399	0.00157751	0.00121742	FCGR2B/PTPN22/DUSP10/MAP3K8/PAK1/MMP8/TAOK3/RASGRP1/NOD2/MLKL/SCIMP/IL1B/STK4/RASSF2/TIAM1/RNF13/PAK2/TLR6/SFRP2/HAND2/PTGER4/F2RL1/MAPK13/VEGFA/SEMA3A/AKR1B1/LYN/RIPK2/MYC/PBK/SYK	31	Module 5
GO:0048002	antigen processing and presentation of peptide antigen	23/943	194/18866	0.000109155	0.00158422	0.00122259	FCER1G/FCGR2B/CTSS/NCF2/KIF11/KIF18A/RACGAP1/LGMN/IFI30/SLC11A1/NCF4/KIF15/CENPE/HLA-DQB1/HLA-DMB/HLA-DMA/HLA-DOA/HLA-DPA1/TREM2/CD36/CTSL/CYBB/KIF4A	23	Module 5
GO:0006898	receptor-mediated endocytosis	33/943	328/18866	0.000110305	0.00159062	0.00122754	FCER1G/FCGR2B/PPT1/MRC1/FOLR2/CBL/CD163/NUMB/ANXA2/GSG1L/CXCL16/COLEC12/APOC1/LILRB1/MARCO/ITGA4/RAMP1/SNAP25/ITGB2/GRK3/APOL1/PIK3CB/TFRC/JCHAIN/SNCA/FCHO2/DAB2/VEGFA/SNAP91/CD36/MSR1/CTSL/SYK	33	Module 5
GO:0002604	regulation of dendritic cell antigen processing and presentation	5/943	11/18866	0.000110781	0.00159062	0.00122754	FCGR2B/THBS1/NOD2/CD68/SLC11A1	5	Module 5
GO:0070673	response to interleukin-18	5/943	11/18866	0.000110781	0.00159062	0.00122754	ALOX5/IL18/IL18RAP/CLDN1/RIPK2	5	Module 5
GO:1903980	positive regulation of microglial cell activation	5/943	11/18866	0.000110781	0.00159062	0.00122754	CTSC/MMP8/CCL3/MIR142/TREM2	5	Module 5
GO:0010819	regulation of T cell chemotaxis	6/943	17/18866	0.000118049	0.00168149	0.00129766	XCL1/ADAM10/CCL5/ADAM17/CCR2/CXCL10	6	Module 5
GO:0030730	sequestering of triglyceride	6/943	17/18866	0.000118049	0.00168149	0.00129766	OSBPL8/IL1B/PPARG/OSBPL11/LPL/PLIN2	6	Module 5
GO:0033631	cell-cell adhesion mediated by integrin	6/943	17/18866	0.000118049	0.00168149	0.00129766	CD3E/CCL5/SKAP1/ITGA4/DPP4/ADAM9	6	Module 5
GO:0050688	regulation of defense response to virus	13/943	78/18866	0.000120314	0.00170922	0.00131906	PTPN22/AIM2/IL2RA/BIRC3/MMP12/RNF125/LILRB1/IL1B/STAT1/APOBEC3F/APOBEC3G/DTX3L/TNFAIP3	13	Module 5
GO:0030168	platelet activation	20/943	158/18866	0.000122884	0.00173654	0.00134015	FCER1G/VAV3/PRKCQ/UBASH3B/TRPC6/ITPR2/GNG2/PRKCH/VAV1/PLEK/MERTK/RAP2B/PIK3CB/TXK/TEC/LCP2/FYN/PIK3CG/LYN/SYK	20	Module 5
GO:0060402	calcium ion transport into cytosol	20/943	158/18866	0.000122884	0.00173654	0.00134015	XCL1/PTPRC/UBASH3B/CD4/P2RX7/P2RX4/ITPR2/ERO1A/CEMIP/MYO5A/CORO1A/CCL3/CXCL10/CXCL11/SNCA/FYN/LYN/CHD7/ADRA1A/JPH1	20	Module 5
GO:0034143	regulation of toll-like receptor 4 signaling pathway	7/943	24/18866	0.000124712	0.00175775	0.00135652	PTPN22/NR1H3/PELI1/F2RL1/TNFAIP3/LYN/RAB7B	7	Module 5
GO:2000107	negative regulation of leukocyte apoptotic process	10/943	49/18866	0.000128681	0.00180504	0.00139301	FCER1G/PRKCQ/HIF1A/NOD2/CCL5/LILRB1/MERTK/HCLS1/IL7R/DOCK8	10	Module 5
GO:0019722	calcium-mediated signaling	25/943	222/18866	0.000128739	0.00180504	0.00139301	RCAN3/PTPRC/PTPRJ/CD3E/CD4/P2RX7/P2RX4/IGF1/EDNRB/MCTP2/MYO5A/CALML4/CCL3/PLEK/CXCR4/CXCR6/CCR2/TRAT1/AGTR1/CCR1/MCTP1/TREM2/JPH1/SYK/BTK	25	Module 5
GO:0007584	response to nutrient	21/943	171/18866	0.000130004	0.00181802	0.00140303	FOLR2/CD3E/CD4/ATP2B1/NOD2/TRIM25/BRIP1/STAT1/PPARG/SPP1/CXCL10/SFRP2/ACSL1/ITGA2/ARSB/C2/TRIM24/LPL/ABCA1/CYBB/ACSL4	21	Module 5
GO:0043304	regulation of mast cell degranulation	8/943	32/18866	0.000136027	0.00189731	0.00146422	FCER1G/CD84/C12orf4/CD300A/ADGRE2/RAC2/LYN/SYK	8	Module 5
GO:0071260	cellular response to mechanical stimulus	13/943	79/18866	0.000137523	0.0019132	0.00147648	SLC2A1/TLR5/BNIP3/CHEK1/MMP7/CASP5/CASP1/IL1B/PTGER4/ITGA2/MAP3K1/IRF1/TNFRSF10A	13	Module 5
GO:0030100	regulation of endocytosis	24/943	210/18866	0.000138784	0.00192577	0.00148618	PPT1/NR1H3/CBL/NCKAP1L/LGALS3/NUMB/ANXA2/GSG1L/CD300A/NEDD4L/APOC1/LILRB1/PPARG/PIK3CB/SNCA/ITGA2/F2RL1/DAB2/MCTP1/VEGFA/TREM2/SNAP91/CD36/SYK	24	Module 5
GO:0010522	regulation of calcium ion transport into cytosol	15/943	101/18866	0.000143972	0.00199261	0.00153776	XCL1/UBASH3B/CD4/P2RX7/P2RX4/CEMIP/MYO5A/CORO1A/CXCL10/CXCL11/SNCA/FYN/LYN/CHD7/JPH1	15	Module 5
GO:0072511	divalent inorganic cation transport	43/943	478/18866	0.000147191	0.00203192	0.0015681	GJA4/PDE4B/XCL1/PTPRC/CD84/UBASH3B/TRPC6/CD4/P2RX7/P2RX4/ITPR2/SLC11A2/ATP2B1/LGALS3/SLC24A4/ERO1A/CEMIP/IL16/MYO5A/ANXA2/CORO1A/PKD1L3/CCL8/CCL5/CCL3/SLC39A11/CD33/LILRB1/LILRB2/SLC11A1/RAMP1/CXCR4/CCR1/CXCL10/CXCL11/SNCA/SLC39A8/FYN/PIK3CG/LYN/CHD7/ADRA1A/JPH1	43	Module 5
GO:0001961	positive regulation of cytokine-mediated signaling pathway	10/943	50/18866	0.000153728	0.00211131	0.00162937	MMP12/CASP4/CASP1/HIF1A/ADAM17/CXCR4/TXK/TREM2/RIPK2/IL7	10	Module 5
GO:0032760	positive regulation of tumor necrosis factor production	10/943	50/18866	0.000153728	0.00211131	0.00162937	CD2/FCER1G/PTPRC/PTPRJ/RASGRP1/NOD2/CCL3/CD36/TWIST1/RIPK2	10	Module 5
GO:0038083	peptidyl-tyrosine autophosphorylation	9/943	41/18866	0.000154542	0.00211706	0.00163381	HCK/TXK/TEC/ITK/VEGFA/FYN/LYN/SLA/SYK	9	Module 5
GO:1901224	positive regulation of NIK/NF-kappaB signaling	13/943	80/18866	0.000156809	0.00214266	0.00165356	CHI3L1/MMP8/IL18/NOD2/MALT1/LIMS1/IL1B/CD86/TLR6/HAVCR2/TREM2/TNFRSF10A/TNFSF15	13	Module 5
GO:0006643	membrane lipid metabolic process	24/943	212/18866	0.000160633	0.00218934	0.00168959	SCCPDH/PPT1/SGPL1/PSAP/ACER3/P2RX7/SGPP1/SPTLC2/HEXA/ORMDL3/B3GALT1/CYP1B1/SUMF1/GLB1/HEXB/GM2A/SERINC5/ST8SIA4/ITGB8/CLN8/ASAH1/NSMAF/UGCG/GLA	24	Module 5
GO:0034103	regulation of tissue remodeling	14/943	91/18866	0.000162168	0.0021991	0.00169712	GPR137B/UBASH3B/IL18/P2RX7/INPP5D/TFRC/SPP1/HAND2/CSF1R/TNFAIP3/GPNMB/CA2/DCSTAMP/SYK	14	Module 5
GO:0060333	interferon-gamma-mediated signaling pathway	14/943	91/18866	0.000162168	0.0021991	0.00169712	NR1H3/IRF8/TRIM25/IFI30/NMI/STAT1/HCK/IFNGR2/PPARG/TXK/IRF1/HLA-DQB1/HLA-DPA1/IFNGR1	14	Module 5
GO:0071677	positive regulation of mononuclear cell migration	7/943	25/18866	0.000165782	0.00224244	0.00173056	LGALS3/LGMN/CCL5/CCR2/CCR1/CXCL10/PLA2G7	7	Module 5
GO:0010885	regulation of cholesterol storage	6/943	18/18866	0.000169609	0.0022827	0.00176164	NR1H3/PPARG/CD36/LPL/MSR1/ABCA1	6	Module 5
GO:2001185	regulation of CD8-positive alpha-beta T cell activation	6/943	18/18866	0.000169609	0.0022827	0.00176164	XCL1/PTPN22/CRTAM/NCKAP1L/LILRB1/IRF1	6	Module 5
GO:0033006	regulation of mast cell activation involved in immune response	8/943	33/18866	0.000171753	0.00230578	0.00177945	FCER1G/CD84/C12orf4/CD300A/ADGRE2/RAC2/LYN/SYK	8	Module 5
GO:0019915	lipid storage	13/943	81/18866	0.000178376	0.00238873	0.00184346	NR1H3/OSBPL8/IL1B/NRIP1/PPARG/OSBPL11/HEXB/GM2A/CD36/LPL/MSR1/PLIN2/ABCA1	13	Module 5
GO:0002468	dendritic cell antigen processing and presentation	5/943	12/18866	0.000182097	0.00241135	0.00186092	FCGR2B/THBS1/NOD2/CD68/SLC11A1	5	Module 5
GO:0032494	response to peptidoglycan	5/943	12/18866	0.000182097	0.00241135	0.00186092	NLRP3/NOD2/C5AR1/TREM2/RIPK2	5	Module 5
GO:0043383	negative T cell selection	5/943	12/18866	0.000182097	0.00241135	0.00186092	PTPRC/CD3E/CD28/DOCK2/THEMIS	5	Module 5
GO:0070493	thrombin-activated receptor signaling pathway	5/943	12/18866	0.000182097	0.00241135	0.00186092	PLEK/SNCA/HPGD/IQGAP2/F2RL1	5	Module 5
GO:0002762	negative regulation of myeloid leukocyte differentiation	10/943	51/18866	0.00018276	0.00241135	0.00186092	C1QC/GPR137B/UBASH3B/CCL3/LILRB1/TMEM178A/INPP5D/MAFB/LYN/MYC	10	Module 5
GO:0043277	apoptotic cell clearance	10/943	51/18866	0.00018276	0.00241135	0.00186092	NR1H3/THBS1/TYROBP/MERTK/MARCO/RAC2/CCR2/C2/TREM2/CD36	10	Module 5
GO:0002707	negative regulation of lymphocyte mediated immunity	9/943	42/18866	0.000188056	0.00247515	0.00191016	FCGR2B/XCL1/PTPRC/CR1/LILRB1/CD96/IL7R/HAVCR2/SERPINB9	9	Module 5
GO:0002433	immune response-regulating cell surface receptor signaling pathway involved in phagocytosis	18/943	139/18866	0.000197664	0.00258892	0.00199796	FCGR2A/FCGR2B/PTPRC/VAV3/FCGR3A/PTPRJ/CD3G/PAK1/NCKAP1L/ARPC3/VAV1/HCK/PIK3CB/FYN/ELMO1/MYO1G/LYN/SYK	18	Module 5
GO:0038096	Fc-gamma receptor signaling pathway involved in phagocytosis	18/943	139/18866	0.000197664	0.00258892	0.00199796	FCGR2A/FCGR2B/PTPRC/VAV3/FCGR3A/PTPRJ/CD3G/PAK1/NCKAP1L/ARPC3/VAV1/HCK/PIK3CB/FYN/ELMO1/MYO1G/LYN/SYK	18	Module 5
GO:0031348	negative regulation of defense response	28/943	269/18866	0.00020277	0.00264933	0.00204458	SLAMF8/FCGR2B/PTPRC/CR1/NLRP3/DUSP10/ALOX5/IL2RA/NR1H3/MMP12/LPCAT3/IGF1/MIR142/RNF125/LILRB1/ACP5/NMI/SAMHD1/PPARG/CD96/CD200R1/PTGER4/HAVCR2/TNFAIP3/SERPINB9/AOAH/PBK/VSIG4	28	Module 5
GO:0006816	calcium ion transport	39/943	426/18866	0.000206352	0.00268959	0.00207564	GJA4/PDE4B/XCL1/PTPRC/CD84/UBASH3B/TRPC6/CD4/P2RX7/P2RX4/ITPR2/ATP2B1/LGALS3/SLC24A4/ERO1A/CEMIP/IL16/MYO5A/ANXA2/CORO1A/PKD1L3/CCL8/CCL5/CCL3/CD33/LILRB1/LILRB2/RAMP1/CXCR4/CCR1/CXCL10/CXCL11/SNCA/FYN/PIK3CG/LYN/CHD7/ADRA1A/JPH1	39	Module 5
GO:0002478	antigen processing and presentation of exogenous peptide antigen	21/943	177/18866	0.000211502	0.00275004	0.0021223	FCER1G/FCGR2B/CTSS/NCF2/KIF11/KIF18A/RACGAP1/LGMN/IFI30/NCF4/KIF15/CENPE/HLA-DQB1/HLA-DMB/HLA-DMA/HLA-DOA/HLA-DPA1/CD36/CTSL/CYBB/KIF4A	21	Module 5
GO:0051651	maintenance of location in cell	24/943	216/18866	0.000213674	0.00277157	0.00213891	GPSM2/XCL1/PTPRC/ASPM/UBASH3B/FTH1/CD4/P2RX7/ITPR2/TWF1/ERO1A/CEMIP/MYO5A/CORO1A/CCL3/FTL/HK2/CCDC88A/CXCL10/CXCL11/SNCA/LYN/CHD7/JPH1	24	Module 5
GO:0071622	regulation of granulocyte chemotaxis	10/943	52/18866	0.000216264	0.00278952	0.00215276	XCL1/NCKAP1L/C3AR1/THBS1/CCL5/C5AR1/DPP4/RAC2/CSF1R/MPP1	10	Module 5
GO:1903557	positive regulation of tumor necrosis factor superfamily cytokine production	10/943	52/18866	0.000216264	0.00278952	0.00215276	CD2/FCER1G/PTPRC/PTPRJ/RASGRP1/NOD2/CCL3/CD36/TWIST1/RIPK2	10	Module 5
GO:0002507	tolerance induction	7/943	26/18866	0.000217136	0.00278952	0.00215276	IL2RA/CD3E/LILRB2/ICOS/HAVCR2/TNFAIP3/LYN	7	Module 5
GO:0097066	response to thyroid hormone	7/943	26/18866	0.000217136	0.00278952	0.00215276	CTSS/ANXA2/CTSH/SLC26A5/AKR1B1/CTSB/CTSL	7	Module 5
GO:0002260	lymphocyte homeostasis	11/943	62/18866	0.000224127	0.00287186	0.00221631	IL2RA/NCKAP1L/P2RX7/HIF1A/CCNB2/CORO1A/BCL2L11/GAPT/TNFAIP3/LYN/GPR174	11	Module 5
GO:0098657	import into cell	25/943	230/18866	0.000224615	0.00287186	0.00221631	SLC2A1/GLUL/ACSL5/FOLR2/IL10RA/KCNJ5/KCNJ8/SLC11A2/NUMB/THBS1/SLC12A1/GSG1L/SLC47A1/ITGA4/SNAP25/SLC6A6/SNCA/SLC39A8/ACSL1/SLC1A3/SLC36A1/TREM2/FYN/CD36/SLC31A1	25	Module 5
GO:0002369	T cell cytokine production	9/943	43/18866	0.000227402	0.00290059	0.00223848	XCL1/NLRP3/DENND1B/IL18/MALT1/IL18RAP/SLC11A1/IL1B/CCR2	9	Module 5
GO:0060401	cytosolic calcium ion transport	21/943	178/18866	0.00022876	0.002911	0.00224652	XCL1/PTPRC/UBASH3B/CD4/P2RX7/P2RX4/ITPR2/ATP2B1/ERO1A/CEMIP/MYO5A/CORO1A/CCL3/CXCL10/CXCL11/SNCA/FYN/LYN/CHD7/ADRA1A/JPH1	21	Module 5
GO:0006979	response to oxidative stress	41/943	458/18866	0.000230688	0.00292859	0.00226009	TXNIP/SLC25A24/NCF2/ALOX5/CDK1/PSAP/BNIP3/ARNTL/PRR5L/TRPC6/HIF1A/ERO1A/PDE8A/RHOB/IL18RAP/CYP1B1/STAT1/MAP1LC3A/MMP9/NCF4/FANCD2/ATG7/ECT2/TLR6/SNCA/CCNA2/MCTP1/MAPK13/NCOA7/TNFAIP3/FYN/VNN1/CD36/EZH2/ADAM9/MELK/DAPK1/PTGS1/CYBB/BTK/AIFM1	41	Module 5
GO:0010744	positive regulation of macrophage derived foam cell differentiation	6/943	19/18866	0.000237451	0.00300026	0.0023154	IL18/PRKCH/AGTR1/CD36/LPL/MSR1	6	Module 5
GO:0090026	positive regulation of monocyte chemotaxis	6/943	19/18866	0.000237451	0.00300026	0.0023154	LGMN/CCL5/CCR2/CCR1/CXCL10/PLA2G7	6	Module 5
GO:0009311	oligosaccharide metabolic process	10/943	53/18866	0.000254771	0.00321155	0.00247846	SLC2A1/MPDU1/B3GALT1/MANBA/HEXB/GM2A/ST8SIA4/B4GALT1/FBP1/GLA	10	Module 5
GO:0051209	release of sequestered calcium ion into cytosol	16/943	118/18866	0.000258723	0.00325138	0.0025092	XCL1/PTPRC/UBASH3B/P2RX7/ITPR2/ERO1A/CEMIP/MYO5A/CORO1A/CCL3/CXCL10/CXCL11/SNCA/LYN/CHD7/JPH1	16	Module 5
GO:0006260	DNA replication	28/943	273/18866	0.000259141	0.00325138	0.0025092	DTL/EXO1/ID3/CLSPN/S100A11/CDK1/FAM111B/POLD3/CHEK1/BAZ1A/WDHD1/BLM/RFWD3/SLFN11/BRCA1/BRIP1/RBBP8/RRM2/CCDC88A/SAMHD1/CHEK2/ATG7/POLQ/TOPBP1/CCNA2/ESCO2/MCM4/CCNE2	28	Module 5
GO:0045066	regulatory T cell differentiation	8/943	35/18866	0.000266417	0.00333487	0.00257363	CR1/DUSP10/IL2RA/LILRB2/CD28/FANCD2/IRF1/TOX	8	Module 5
GO:2000404	regulation of T cell migration	9/943	44/18866	0.000273343	0.00341361	0.0026344	XCL1/ADAM10/CCL5/ITGA4/ADAM17/CCR2/CD200R1/CXCL10/DOCK8	9	Module 5
GO:0072593	reactive oxygen species metabolic process	29/943	288/18866	0.000277031	0.00345164	0.00266374	NCF2/ALOX5/BNIP3/PRCP/MMP8/P2RX7/P2RX4/HIF1A/THBS1/TMEM106A/BRCA1/VAV1/ACP5/TYROBP/HK2/CYP1B1/IL1B/ITGB2/NCF4/RAC2/AGTR1/TLR6/SNCA/F2RL1/FYN/CD36/SYK/CYBB/GLA	29	Module 5
GO:0033081	regulation of T cell differentiation in thymus	7/943	27/18866	0.000280579	0.00347091	0.00267862	TESPA1/RASGRP1/IL1B/IL7R/CAMK4/VNN1/TOX	7	Module 5
GO:1901623	regulation of lymphocyte chemotaxis	7/943	27/18866	0.000280579	0.00347091	0.00267862	XCL1/ADAM10/CCL5/CCL3/ADAM17/CCR2/CXCL10	7	Module 5
GO:0002430	complement receptor mediated signaling pathway	5/943	13/18866	0.000283749	0.00347091	0.00267862	CR1/C3AR1/C5AR1/FPR3/FPR1	5	Module 5
GO:0032725	positive regulation of granulocyte macrophage colony-stimulating factor production	5/943	13/18866	0.000283749	0.00347091	0.00267862	IL18/RASGRP1/IL1B/CD80/SYK	5	Module 5
GO:0033089	positive regulation of T cell differentiation in thymus	5/943	13/18866	0.000283749	0.00347091	0.00267862	TESPA1/RASGRP1/IL1B/IL7R/VNN1	5	Module 5
GO:0045579	positive regulation of B cell differentiation	5/943	13/18866	0.000283749	0.00347091	0.00267862	NCKAP1L/INPP5D/IL7/SYK/BTK	5	Module 5
GO:1903977	positive regulation of glial cell migration	5/943	13/18866	0.000283749	0.00347091	0.00267862	P2RX4/CCL3/TIAM1/CCR2/TREM2	5	Module 5
GO:2001198	regulation of dendritic cell differentiation	5/943	13/18866	0.000283749	0.00347091	0.00267862	FCGR2B/LILRB1/LILRB2/TMEM176A/TMEM176B	5	Module 5
GO:0051283	negative regulation of sequestering of calcium ion	16/943	119/18866	0.000285322	0.00347433	0.00268126	XCL1/PTPRC/UBASH3B/P2RX7/ITPR2/ERO1A/CEMIP/MYO5A/CORO1A/CCL3/CXCL10/CXCL11/SNCA/LYN/CHD7/JPH1	16	Module 5
GO:1901222	regulation of NIK/NF-kappaB signaling	16/943	119/18866	0.000285322	0.00347433	0.00268126	NLRP3/PTPN22/CHI3L1/MMP8/IL18/NOD2/MALT1/LIMS1/IL1B/RASSF2/CD86/TLR6/HAVCR2/TREM2/TNFRSF10A/TNFSF15	16	Module 5
GO:0046637	regulation of alpha-beta T cell differentiation	11/943	64/18866	0.000299357	0.00363699	0.00280679	NLRP3/IL18/NCKAP1L/PNP/MALT1/CD86/CD80/CD83/PRDM1/RIPK2/SYK	11	Module 5
GO:0045766	positive regulation of angiogenesis	23/943	208/18866	0.000307555	0.00372815	0.00287714	CHI3L1/NRP1/C3AR1/FLT1/HIF1A/THBS1/CTSH/BRCA1/GATA6/C5AR1/RHOB/HK2/CYP1B1/IL1B/CXCR4/ITGB2/AGTR1/SFRP2/VEGFC/VEGFA/ITGB8/TWIST1/CYBB	23	Module 5
GO:1990868	response to chemokine	14/943	97/18866	0.000321711	0.00388223	0.00299604	XCL1/HIF1A/CCL8/CCL18/CCL5/CCL3/CXCR4/CXCR6/CCR2/CCR1/CXCL10/CXCL11/TREM2/DOCK8	14	Module 5
GO:1990869	cellular response to chemokine	14/943	97/18866	0.000321711	0.00388223	0.00299604	XCL1/HIF1A/CCL8/CCL18/CCL5/CCL3/CXCR4/CXCR6/CCR2/CCR1/CXCL10/CXCL11/TREM2/DOCK8	14	Module 5
GO:0032602	chemokine production	12/943	75/18866	0.000322628	0.00388442	0.00299774	IL18/HIF1A/ADAM17/IL1B/F2RL1/HAVCR2/TREM2/TWIST1/LPL/RIPK2/IL7/SYK	12	Module 5
GO:0001911	negative regulation of leukocyte mediated cytotoxicity	6/943	20/18866	0.000324944	0.00388442	0.00299774	FCGR2B/PTPRC/LILRB1/IL7R/HAVCR2/SERPINB9	6	Module 5
GO:0010878	cholesterol storage	6/943	20/18866	0.000324944	0.00388442	0.00299774	NR1H3/PPARG/CD36/LPL/MSR1/ABCA1	6	Module 5
GO:0032722	positive regulation of chemokine production	9/943	45/18866	0.000326706	0.00388442	0.00299774	HIF1A/ADAM17/IL1B/HAVCR2/TWIST1/LPL/RIPK2/IL7/SYK	9	Module 5
GO:0009595	detection of biotic stimulus	8/943	36/18866	0.00032768	0.00388442	0.00299774	NLRP3/PTPRJ/CRTAM/PAK1/NOD2/NLRC4/TLR6/TREM2	8	Module 5
GO:0010543	regulation of platelet activation	8/943	36/18866	0.00032768	0.00388442	0.00299774	FCER1G/PRKCQ/UBASH3B/PLEK/TXK/TEC/LYN/SYK	8	Module 5
GO:0031572	G2 DNA damage checkpoint	8/943	36/18866	0.00032768	0.00388442	0.00299774	DTL/CLSPN/CDK1/CHEK1/TAOK3/BLM/BRCA1/TOPBP1	8	Module 5
GO:0043368	positive T cell selection	8/943	36/18866	0.00032768	0.00388442	0.00299774	PTPRC/SLAMF6/CD3E/CD3G/DOCK2/THEMIS/TOX/CTSL	8	Module 5
GO:0051282	regulation of sequestering of calcium ion	16/943	121/18866	0.000345679	0.00408876	0.00315544	XCL1/PTPRC/UBASH3B/P2RX7/ITPR2/ERO1A/CEMIP/MYO5A/CORO1A/CCL3/CXCL10/CXCL11/SNCA/LYN/CHD7/JPH1	16	Module 5
GO:0032720	negative regulation of tumor necrosis factor production	10/943	55/18866	0.000349131	0.00411148	0.00317297	PTPN22/IGF1/DICER1/CD33/ACP5/HAVCR2/TNFAIP3/TREM2/GPNMB/TWIST1	10	Module 5
GO:0051452	intracellular pH reduction	10/943	55/18866	0.000349131	0.00411148	0.00317297	SLAMF8/PPT1/RAB39A/DMXL2/ATP6V0A1/SLC11A1/ATP6V1A/CA2/ATP6V0D2/ATP6V1H	10	Module 5
GO:0051302	regulation of cell division	20/943	171/18866	0.000358084	0.00418949	0.00323317	CDC14A/TXNIP/ASPM/KIF14/RACGAP1/CIT/BLM/PRC1/CENPV/EVI2B/IL1B/RBL1/ECT2/PLK4/SFRP2/VEGFC/KIF20A/VEGFA/MACC1/MYC	20	Module 5
GO:0010575	positive regulation of vascular endothelial growth factor production	7/943	28/18866	0.000358096	0.00418949	0.00323317	C3AR1/HIF1A/BRCA1/C5AR1/CYP1B1/IL1B/HPSE	7	Module 5
GO:2000191	regulation of fatty acid transport	7/943	28/18866	0.000358096	0.00418949	0.00323317	ACSL5/P2RX7/P2RX4/THBS1/MAP2K6/IL1B/SYK	7	Module 5
GO:0042542	response to hydrogen peroxide	18/943	146/18866	0.000365393	0.00426556	0.00329188	TXNIP/CDK1/PSAP/BNIP3/TRPC6/PDE8A/RHOB/IL18RAP/CYP1B1/STAT1/MAP1LC3A/ECT2/MAPK13/TNFAIP3/FYN/EZH2/ADAM9/AIFM1	18	Module 5
GO:0043280	positive regulation of cysteine-type endopeptidase activity involved in apoptotic process	17/943	134/18866	0.000375942	0.00437919	0.00337957	NLRP3/CASP1/CTSH/MALT1/CARD8/BCL2L11/CASP10/NLRC4/PPARG/SNCA/MYC/TNFRSF10A/ST18/DAPK1/SYK/TNFSF15/AIFM1	17	Module 5
GO:0060249	anatomical structure homeostasis	41/943	469/18866	0.000376916	0.00438104	0.00338099	GPR137B/EXO1/SLC2A1/CTSK/PRKCQ/LIPA/POLD3/UBASH3B/TPP1/LYZ/P2RX7/P2RX4/ATP2B1/HIF1A/BLM/CTSH/CORO1A/NOD2/PECAM1/ACP5/INPP5D/CHRNA1/CXADR/RAC2/CCR2/CLDN1/TFRC/SPP1/JCHAIN/SLC39A8/CSF1R/VEGFA/TNFAIP3/SNX10/AKR1B1/CA2/DCSTAMP/MYC/IL7/CCNE2/SYK	41	Module 5
GO:0070304	positive regulation of stress-activated protein kinase signaling cascade	20/943	172/18866	0.000386613	0.00447562	0.00345399	FCGR2B/PAK1/MMP8/TAOK3/RASGRP1/NOD2/MLKL/SCIMP/IL1B/RASSF2/TIAM1/RNF13/TLR6/HAND2/F2RL1/VEGFA/SEMA3A/LYN/RIPK2/SYK	20	Module 5
GO:0050678	regulation of epithelial cell proliferation	36/943	395/18866	0.00038809	0.00447562	0.00345399	NRAS/GLUL/DUSP10/ALOX5/NRP1/MMP12/JAML/CDKN1B/IGF1/FLT1/EDNRB/HIF1A/SIX4/THBS1/NOD2/NUPR1/CCL5/C5AR1/ITGA4/NRP2/ADAM17/STAT1/PPARG/EAF2/AGTR1/CLDN1/SFRP2/VEGFC/VEGFA/MIR133B/CD109/TNFAIP3/TWIST1/MYC/MTSS1/B4GALT1	36	Module 5
GO:0019884	antigen processing and presentation of exogenous antigen	21/943	185/18866	0.000388203	0.00447562	0.00345399	FCER1G/FCGR2B/CTSS/NCF2/KIF11/KIF18A/RACGAP1/LGMN/IFI30/NCF4/KIF15/CENPE/HLA-DQB1/HLA-DMB/HLA-DMA/HLA-DOA/HLA-DPA1/CD36/CTSL/CYBB/KIF4A	21	Module 5
GO:0032692	negative regulation of interleukin-1 production	9/943	46/18866	0.000388387	0.00447562	0.00345399	NLRP3/IGF1/MIR142/CD33/ACP5/CARD8/TNFAIP3/SERPINB1/TREM2	9	Module 5
GO:0062207	regulation of pattern recognition receptor signaling pathway	14/943	99/18866	0.000398584	0.00458329	0.00353708	PTPN22/TLR5/NR1H3/BIRC3/CD300A/RNF125/PELI1/TLR6/F2RL1/IRF1/TNFAIP3/CD36/LYN/RAB7B	14	Module 5
GO:0034508	centromere complex assembly	10/943	56/18866	0.000406263	0.00466161	0.00359752	CENPF/HELLS/DLGAP5/KNL1/CENPN/CENPV/HJURP/CENPE/CENPU/CENPK	10	Module 5
GO:0050853	B cell receptor signaling pathway	17/943	135/18866	0.000410509	0.00470029	0.00362737	FCGR2B/PTPRC/VAV3/PTPN22/BLNK/LPXN/NCKAP1L/ELF1/PRKCH/CD300A/GCSAM/KLHL6/TEC/ITK/LYN/SYK/BTK	17	Module 5
GO:0070098	chemokine-mediated signaling pathway	13/943	88/18866	0.000413414	0.00471205	0.00363645	XCL1/HIF1A/CCL8/CCL18/CCL5/CCL3/CXCR4/CXCR6/CCR2/CCR1/CXCL10/CXCL11/TREM2	13	Module 5
GO:0002526	acute inflammatory response	15/943	111/18866	0.000413648	0.00471205	0.00363645	FCER1G/FCGR2B/NLRP3/PRCP/CD163/EDNRB/SERPINA1/NUPR1/IL1B/PPARG/TREM1/VNN1/PIK3CG/B4GALT1/BTK	15	Module 5
GO:0014015	positive regulation of gliogenesis	12/943	77/18866	0.000414169	0.00471205	0.00363645	P2RX4/PRKCH/DICER1/CCL3/MIR142/IL1B/CXCR4/TIAM1/PPARG/CCR2/TREM2/LYN	12	Module 5
GO:0010889	regulation of sequestering of triglyceride	5/943	14/18866	0.000423274	0.00476516	0.00367744	OSBPL8/PPARG/OSBPL11/LPL/PLIN2	5	Module 5
GO:0032310	prostaglandin secretion	5/943	14/18866	0.000423274	0.00476516	0.00367744	P2RX7/P2RX4/ABCC4/MAP2K6/IL1B	5	Module 5
GO:0035627	ceramide transport	5/943	14/18866	0.000423274	0.00476516	0.00367744	PSAP/SGPP1/PLTP/MTTP/ABCB1	5	Module 5
GO:0045059	positive thymic T cell selection	5/943	14/18866	0.000423274	0.00476516	0.00367744	PTPRC/CD3E/CD3G/DOCK2/TOX	5	Module 5
GO:0070431	nucleotide-binding oligomerization domain containing 2 signaling pathway	5/943	14/18866	0.000423274	0.00476516	0.00367744	PTPN22/LACC1/NOD2/TNFAIP3/RIPK2	5	Module 5
GO:0070302	regulation of stress-activated protein kinase signaling cascade	25/943	240/18866	0.000429835	0.0048289	0.00372663	FCGR2B/PTPN22/DUSP10/PAK1/MMP8/TAOK3/RASGRP1/NOD2/MLKL/SCIMP/IL1B/RASSF2/TIAM1/RNF13/TLR6/SFRP2/HAND2/F2RL1/VEGFA/SEMA3A/LYN/RIPK2/MYC/PBK/SYK	25	Module 5
GO:0042107	cytokine metabolic process	6/943	21/18866	0.000435802	0.0048654	0.0037548	IL18/CD28/CD80/PCSK5/SYK/TNFSF15	6	Module 5
GO:0140131	positive regulation of lymphocyte chemotaxis	6/943	21/18866	0.000435802	0.0048654	0.0037548	XCL1/ADAM10/CCL5/CCL3/ADAM17/CCR2	6	Module 5
GO:1903978	regulation of microglial cell activation	6/943	21/18866	0.000435802	0.0048654	0.0037548	PTPRC/CTSC/MMP8/CCL3/MIR142/TREM2	6	Module 5
GO:0045807	positive regulation of endocytosis	14/943	100/18866	0.000442564	0.00492044	0.00379727	PPT1/CBL/NCKAP1L/ANXA2/NEDD4L/PPARG/SNCA/ITGA2/F2RL1/DAB2/VEGFA/TREM2/CD36/SYK	14	Module 5
GO:0070301	cellular response to hydrogen peroxide	14/943	100/18866	0.000442564	0.00492044	0.00379727	CDK1/PSAP/BNIP3/TRPC6/PDE8A/RHOB/IL18RAP/CYP1B1/MAP1LC3A/ECT2/MAPK13/TNFAIP3/EZH2/AIFM1	14	Module 5
GO:1901653	cellular response to peptide	36/943	398/18866	0.000447265	0.00494185	0.0038138	FCGR2B/PTPN22/PTPRE/PRKCQ/PAK1/CASP4/OSBPL8/ATP2B1/IGF1/SNX6/LGMN/MYO5A/NOD2/ATP6V0A1/BRIP1/RAB8A/RAB10/BCL2L11/ITGA4/IL1B/STAT1/PPARG/ATP6V1A/AGTR1/TLR6/CCNA2/TREM2/FYN/CD36/AKR1B1/LPL/LYN/CA2/ATP6V0D2/RIPK2/ATP6V1H	36	Module 5
GO:0015718	monocarboxylic acid transport	20/943	174/18866	0.00044966	0.00494185	0.0038138	SLC2A1/ACSL5/SLC16A12/SLCO2B1/P2RX7/P2RX4/ABCC4/THBS1/AQP9/MAP2K6/SLC16A6/IL1B/PPARG/SLC6A6/ACSL1/EMB/CD36/SYK/PLIN2/ACSL4	20	Module 5
GO:0097696	receptor signaling pathway via STAT	20/943	174/18866	0.00044966	0.00494185	0.0038138	PTPRC/IL10RA/IL18/IGF1/NLK/CD300A/CCL5/PECAM1/CYP1B1/NMI/STAT1/STAT4/IFNAR2/CCR2/HCLS1/IL7R/CSF1R/FYN/AKR1B1/LYN	20	Module 5
GO:0006026	aminoglycan catabolic process	11/943	67/18866	0.000451361	0.00494185	0.0038138	CHI3L1/CHIT1/GNS/CEMIP/HEXA/GLB1/HPSE/HEXB/HMMR/ARSB/GUSB	11	Module 5
GO:0045123	cellular extravasation	11/943	67/18866	0.000451361	0.00494185	0.0038138	JAML/ITGB7/SELPLG/ITGAL/PECAM1/ITGA4/ITGB2/CCR2/PTGER4/PIK3CG/GCNT1	11	Module 5
GO:0002230	positive regulation of defense response to virus by host	7/943	29/18866	0.000451853	0.00494185	0.0038138	PTPN22/AIM2/LILRB1/STAT1/APOBEC3F/APOBEC3G/DTX3L	7	Module 5
GO:0045577	regulation of B cell differentiation	7/943	29/18866	0.000451853	0.00494185	0.0038138	SLAMF8/NCKAP1L/IKZF3/INPP5D/IL7/SYK/BTK	7	Module 5
GO:0045671	negative regulation of osteoclast differentiation	7/943	29/18866	0.000451853	0.00494185	0.0038138	GPR137B/UBASH3B/CCL3/LILRB1/TMEM178A/INPP5D/MAFB	7	Module 5
GO:0051208	sequestering of calcium ion	16/943	124/18866	0.000456748	0.00498524	0.00384728	XCL1/PTPRC/UBASH3B/P2RX7/ITPR2/ERO1A/CEMIP/MYO5A/CORO1A/CCL3/CXCL10/CXCL11/SNCA/LYN/CHD7/JPH1	16	Module 5
GO:0060760	positive regulation of response to cytokine stimulus	10/943	57/18866	0.000470958	0.00511953	0.00395091	MMP12/CASP4/CASP1/HIF1A/ADAM17/CXCR4/TXK/TREM2/RIPK2/IL7	10	Module 5
GO:1903556	negative regulation of tumor necrosis factor superfamily cytokine production	10/943	57/18866	0.000470958	0.00511953	0.00395091	PTPN22/IGF1/DICER1/CD33/ACP5/HAVCR2/TNFAIP3/TREM2/GPNMB/TWIST1	10	Module 5
GO:0043123	positive regulation of I-kappaB kinase/NF-kappaB signaling	21/943	188/18866	0.000481936	0.00522828	0.00403484	BIRC3/CASP1/CD4/NOD2/TMEM106A/TRIM25/MALT1/BST2/REL/SLC20A1/CASP10/PELI1/IL1B/APOL3/ECT2/TFRC/TLR6/F2RL1/FYN/CD36/RIPK2	21	Module 5
GO:0015908	fatty acid transport	14/943	101/18866	0.000490614	0.00529035	0.00408274	SLC2A1/ACSL5/P2RX7/P2RX4/ABCC4/THBS1/MAP2K6/IL1B/PPARG/ACSL1/CD36/SYK/PLIN2/ACSL4	14	Module 5
GO:0045639	positive regulation of myeloid cell differentiation	14/943	101/18866	0.000490614	0.00529035	0.00408274	CD4/NCKAP1L/HIF1A/EVI2B/TYROBP/INPP5D/STAT1/CCR1/HCLS1/LEF1/TREM2/CA2/DCSTAMP/RAB7B	14	Module 5
GO:0060191	regulation of lipase activity	14/943	101/18866	0.000490614	0.00529035	0.00408274	PPT1/NR1H3/FLT1/CCL5/APOC1/C5AR1/CD86/AGTR1/TXK/SNCA/ITK/LPL/ADRA1A/PCSK5	14	Module 5
GO:1905039	carboxylic acid transmembrane transport	18/943	150/18866	0.00050822	0.00546923	0.00422079	LRRC8C/LRRC8D/SLC2A1/ACSL5/SLC16A12/FOLR2/SLC7A7/THBS1/AQP9/SLC7A6/SLC47A1/SLC6A6/SLC25A38/SLC1A3/SLC36A1/EMB/SLC16A10/PRAF2	18	Module 5
GO:0032642	regulation of chemokine production	11/943	68/18866	0.000514546	0.00552623	0.00426478	HIF1A/ADAM17/IL1B/F2RL1/HAVCR2/TREM2/TWIST1/LPL/RIPK2/IL7/SYK	11	Module 5
GO:0097191	extrinsic apoptotic signaling pathway	24/943	230/18866	0.000541087	0.00579968	0.00447581	PTPRC/NRP1/BLOC1S2/P2RX7/IGF1/LGALS3/SGPP1/MOAP1/THBS1/BCL2A1/BRCA1/BCL2L11/ITGA6/ITM2C/IL1B/STK4/PAK2/SFRP2/TNFAIP3/FYN/DEPTOR/TNFRSF10A/IL7/DAPK1	24	Module 5
GO:0045851	pH reduction	10/943	58/18866	0.000543973	0.005819	0.00449072	SLAMF8/PPT1/RAB39A/DMXL2/ATP6V0A1/SLC11A1/ATP6V1A/CA2/ATP6V0D2/ATP6V1H	10	Module 5
GO:1903825	organic acid transmembrane transport	18/943	151/18866	0.000550671	0.00587893	0.00453697	LRRC8C/LRRC8D/SLC2A1/ACSL5/SLC16A12/FOLR2/SLC7A7/THBS1/AQP9/SLC7A6/SLC47A1/SLC6A6/SLC25A38/SLC1A3/SLC36A1/EMB/SLC16A10/PRAF2	18	Module 5
GO:0007259	receptor signaling pathway via JAK-STAT	19/943	164/18866	0.000560061	0.00596732	0.00460518	PTPRC/IL10RA/IL18/IGF1/NLK/CD300A/CCL5/PECAM1/CYP1B1/NMI/STAT1/STAT4/IFNAR2/CCR2/HCLS1/CSF1R/FYN/AKR1B1/LYN	19	Module 5
GO:0060055	angiogenesis involved in wound healing	7/943	30/18866	0.000564194	0.00599945	0.00462997	ALOX5/PRCP/CXCR4/HPSE/VEGFA/TNFAIP3/B4GALT1	7	Module 5
GO:0045061	thymic T cell selection	6/943	22/18866	0.000574069	0.00608038	0.00469243	PTPRC/CD3E/CD3G/CD28/DOCK2/TOX	6	Module 5
GO:0045624	positive regulation of T-helper cell differentiation	6/943	22/18866	0.000574069	0.00608038	0.00469243	NLRP3/IL18/MALT1/CD86/CD80/RIPK2	6	Module 5
GO:0032691	negative regulation of interleukin-1 beta production	8/943	39/18866	0.00058335	0.00616652	0.00475891	NLRP3/IGF1/CD33/ACP5/CARD8/TNFAIP3/SERPINB1/TREM2	8	Module 5
GO:1901570	fatty acid derivative biosynthetic process	14/943	103/18866	0.00060013	0.00633143	0.00488618	PPT1/ALOX5/SCD/ACSL5/FAR2/LTA4H/IL1B/HPGDS/HPGD/ACSL1/TBXAS1/SYK/PTGS1/ACSL4	14	Module 5
GO:0070997	neuron death	33/943	360/18866	0.000602898	0.00634816	0.00489909	C1QA/FCGR2B/KMO/PPT1/KIF14/NRP1/BNIP3/CBL/CIT/HIF1A/SNX6/SIX4/LGMN/CORO1A/NUPR1/CCL5/CCL3/C5AR1/TYROBP/REL/BCL2L11/DLX1/ITGB2/ATG7/CD200R1/TLR6/SNCA/CPEB4/NCOA7/TNFRSF21/FYN/GPNMB/AIFM1	33	Module 5
GO:0030852	regulation of granulocyte differentiation	5/943	15/18866	0.000608891	0.00637377	0.00491885	C1QC/EVI2B/INPP5D/HCLS1/LEF1	5	Module 5
GO:0045779	negative regulation of bone resorption	5/943	15/18866	0.000608891	0.00637377	0.00491885	GPR137B/UBASH3B/P2RX7/INPP5D/TNFAIP3	5	Module 5
GO:0046479	glycosphingolipid catabolic process	5/943	15/18866	0.000608891	0.00637377	0.00491885	PSAP/HEXA/HEXB/GM2A/GLA	5	Module 5
GO:0001667	ameboidal-type cell migration	41/943	481/18866	0.000626307	0.00654332	0.0050497	GLUL/DUSP10/SGPL1/NRP1/PRR5L/LPXN/PAK1/PRCP/P2RX4/ARHGDIB/ITGB7/EDNRB/HIF1A/LGMN/SPRED1/THBS1/CTSH/CENPV/PECAM1/RHOB/ITGA4/NRP2/ADAM17/CYP1B1/DPP4/MMP9/ITGB2/PPARG/ADAMTS9/HAND2/VEGFC/ITGA2/ARSB/VEGFA/MIR133B/ADTRP/ANLN/TWIST1/SEMA3A/ADAM9/PRKX	41	Module 5
GO:0097553	calcium ion transmembrane import into cytosol	17/943	140/18866	0.000627556	0.00654364	0.00504995	XCL1/PTPRC/UBASH3B/P2RX7/ITPR2/ERO1A/CEMIP/MYO5A/CORO1A/CCL3/CXCL10/CXCL11/SNCA/FYN/LYN/CHD7/JPH1	17	Module 5
GO:0070231	T cell apoptotic process	9/943	49/18866	0.000633306	0.00659081	0.00508635	IL2RA/PRKCQ/LGALS3/HIF1A/CCL5/BCL2L11/IL7R/GIMAP8/DOCK8	9	Module 5
GO:0000075	cell cycle checkpoint	23/943	219/18866	0.000639521	0.0066426	0.00512632	DTL/CENPF/CLSPN/HORMAD1/CDK1/CHEK1/CDKN1B/TAOK3/BUB1B/WDR76/BLM/RFWD3/TOP2A/BRCA1/BRIP1/NDC80/NABP1/BUB1/CHEK2/FANCD2/TOPBP1/CCNB1/TTK	23	Module 5
GO:0006879	cellular iron ion homeostasis	11/943	70/18866	0.00066321	0.00686212	0.00529573	NCOA4/FTH1/SLC11A2/HIF1A/NUBP1/FTL/SLC11A1/ATP6V1A/TFRC/SLC39A8/MYC	11	Module 5
GO:0032370	positive regulation of lipid transport	11/943	70/18866	0.00066321	0.00686212	0.00529573	ACSL5/NR1H3/P2RX7/P2RX4/LPCAT3/ANXA2/MAP2K6/IL1B/PLTP/SPP1/ABCA1	11	Module 5
GO:0014065	phosphatidylinositol 3-kinase signaling	18/943	154/18866	0.000696853	0.00719635	0.00555367	MYOC/CEP55/PIK3AP1/PRR5L/CBL/IL18/IGF1/FLT1/RASGRP1/CCL5/CD28/HCLS1/PIK3CB/F2RL1/FYN/PIK3CG/TWIST1/LYN	18	Module 5
GO:0000041	transition metal ion transport	16/943	129/18866	0.000710033	0.00729414	0.00562914	FTH1/TRPC6/SLC11A2/FLVCR2/ATP6V0A1/SLC39A11/FTL/SLC11A1/ATP6V1A/TFRC/SLC39A8/STEAP4/ATP6V0D2/ATP6V1H/SLC31A2/SLC31A1	16	Module 5
GO:0061097	regulation of protein tyrosine kinase activity	13/943	93/18866	0.000710398	0.00729414	0.00562914	PTPRC/CBL/SNX6/CCL5/ADAM17/CASS4/DOCK3/RAP2B/PAK2/CSF1R/FYN/NCAPG2/ADRA1A	13	Module 5
GO:1904894	positive regulation of receptor signaling pathway via STAT	13/943	93/18866	0.000710398	0.00729414	0.00562914	IL10RA/IL18/IGF1/CD300A/CCL5/PECAM1/CYP1B1/HCLS1/IL7R/CSF1R/FYN/AKR1B1/LYN	13	Module 5
GO:0030865	cortical cytoskeleton organization	10/943	60/18866	0.000718227	0.00734644	0.00566949	NCKAP1L/RACGAP1/EPB41L3/RHOB/PLEK/FMNL2/RAC2/ECT2/RHOBTB3/ANLN	10	Module 5
GO:0042093	T-helper cell differentiation	10/943	60/18866	0.000718227	0.00734644	0.00566949	NLRP3/SLAMF6/IL18/TMEM98/MALT1/CD86/CD80/LEF1/PTGER4/RIPK2	10	Module 5
GO:0097006	regulation of plasma lipoprotein particle levels	14/943	105/18866	0.000729712	0.0074229	0.0057285	LIPA/LPCAT3/ANXA2/NPC1/APOC1/PLTP/AGTR1/NCEH1/MTTP/PLA2G7/CD36/LPL/MSR1/ABCA1	14	Module 5
GO:1902106	negative regulation of leukocyte differentiation	14/943	105/18866	0.000729712	0.0074229	0.0057285	C1QC/FCGR2B/GPR137B/UBASH3B/CCL3/LILRB1/TMEM178A/INPP5D/MAFB/IRF1/TMEM176A/TMEM176B/LYN/MYC	14	Module 5
GO:0046578	regulation of Ras protein signal transduction	21/943	194/18866	0.000729849	0.0074229	0.0057285	MYOC/KIF14/NRP1/CBL/ARHGDIB/IGF1/LPAR6/RASGRP1/CYTH1/VAV1/CYTH4/ARHGEF3/F2RL1/LYN/PSD3/ADRA1A/FBP1/ABCA1/LPAR4/P2RY10/GPR174	21	Module 5
GO:1903580	positive regulation of ATP metabolic process	9/943	50/18866	0.00073858	0.00749749	0.00578607	PFKFB2/CDK1/P2RX7/IGF1/HIF1A/NUPR1/CCNB1/TREM2/PGK1	9	Module 5
GO:0007035	vacuolar acidification	6/943	23/18866	0.000744105	0.00751099	0.00579648	PPT1/DMXL2/ATP6V0A1/SLC11A1/ATP6V0D2/ATP6V1H	6	Module 5
GO:0035743	CD4-positive alpha-beta T cell cytokine production	6/943	23/18866	0.000744105	0.00751099	0.00579648	XCL1/NLRP3/DENND1B/IL18/IL18RAP/IL1B	6	Module 5
GO:0072677	eosinophil migration	6/943	23/18866	0.000744105	0.00751099	0.00579648	LGALS3/CCL8/CD300A/CCL5/CCL3/PTGER4	6	Module 5
GO:0002292	T cell differentiation involved in immune response	11/943	71/18866	0.000749983	0.00754197	0.00582039	FCER1G/NLRP3/SLAMF6/IL18/TMEM98/MALT1/CD86/CD80/LEF1/PTGER4/RIPK2	11	Module 5
GO:0035690	cellular response to drug	11/943	71/18866	0.000749983	0.00754197	0.00582039	PDE4B/SLAMF8/AIM2/CD69/RNF149/IL1B/CXCR4/CHEK2/TFRC/MYC/FBP1	11	Module 5
GO:1901214	regulation of neuron death	30/943	321/18866	0.000766674	0.0076954	0.0059388	C1QA/FCGR2B/KMO/PPT1/KIF14/NRP1/CBL/HIF1A/SNX6/SIX4/LGMN/CORO1A/NUPR1/CCL5/CCL3/C5AR1/TYROBP/REL/BCL2L11/DLX1/ITGB2/ATG7/CD200R1/TLR6/SNCA/CPEB4/NCOA7/FYN/GPNMB/AIFM1	30	Module 5
GO:0043491	protein kinase B signaling	27/943	278/18866	0.000773708	0.00775152	0.00598211	MYOC/CHI3L1/PIK3AP1/PTPRJ/IL18/P2RX4/OSBPL8/IGF1/F10/THBS1/CCL5/CCL3/VAV1/MERTK/CD28/ICOS/IL1B/RAC2/TRAT1/CD86/CD80/HCLS1/PIK3CB/HPSE/ADTRP/FYN/PIK3CG	27	Module 5
GO:0000281	mitotic cytokinesis	11/943	72/18866	0.000845973	0.0084469	0.00651876	CEP55/RACGAP1/CIT/CKAP2/NUSAP1/PRC1/RHOB/ECT2/KIF20A/ANLN/KIF4A	11	Module 5
GO:0002830	positive regulation of type 2 immune response	5/943	16/18866	0.000849409	0.0084469	0.00651876	XCL1/NLRP3/IL18/NOD2/CD86	5	Module 5
GO:0010820	positive regulation of T cell chemotaxis	5/943	16/18866	0.000849409	0.0084469	0.00651876	XCL1/ADAM10/CCL5/ADAM17/CCR2	5	Module 5
GO:0030214	hyaluronan catabolic process	5/943	16/18866	0.000849409	0.0084469	0.00651876	CEMIP/HEXA/HEXB/HMMR/GUSB	5	Module 5
GO:0035456	response to interferon-beta	7/943	32/18866	0.000854894	0.00847007	0.00653664	PYHIN1/AIM2/IFITM1/BST2/STAT1/IFNAR2/IRF1	7	Module 5
GO:0045589	regulation of regulatory T cell differentiation	7/943	32/18866	0.000854894	0.00847007	0.00653664	CR1/DUSP10/IL2RA/LILRB2/CD28/FANCD2/IRF1	7	Module 5
GO:0043122	regulation of I-kappaB kinase/NF-kappaB signaling	25/943	252/18866	0.000879769	0.00870048	0.00671446	BIRC3/CASP1/CD4/NOD2/TMEM106A/TRIM25/MALT1/BST2/CARD8/REL/SLC20A1/TANK/CASP10/PELI1/IL1B/STAT1/APOL3/ECT2/TFRC/TLR6/F2RL1/TNFAIP3/FYN/CD36/RIPK2	25	Module 5
GO:0140029	exocytic process	12/943	84/18866	0.000925022	0.0091312	0.00704685	FCER1G/VTI1B/PRRT2/RAB8A/RAB10/PLEK/SNAP25/SNAP29/SNCA/LYN/SYK/BTK	12	Module 5
GO:0002294	CD4-positive alpha-beta T cell differentiation involved in immune response	10/943	62/18866	0.000936047	0.00922307	0.00711775	NLRP3/SLAMF6/IL18/TMEM98/MALT1/CD86/CD80/LEF1/PTGER4/RIPK2	10	Module 5
GO:0002407	dendritic cell chemotaxis	6/943	24/18866	0.000950569	0.0093281	0.00719881	SLAMF8/CCL5/CXCR4/CCR2/CCR1/PIK3CG	6	Module 5
GO:0031342	negative regulation of cell killing	6/943	24/18866	0.000950569	0.0093281	0.00719881	FCGR2B/PTPRC/LILRB1/IL7R/HAVCR2/SERPINB9	6	Module 5
GO:0002709	regulation of T cell mediated immunity	11/943	73/18866	0.000951917	0.0093281	0.00719881	FCGR2B/XCL1/PTPRC/NLRP3/IL18/P2RX7/MALT1/LILRB1/IL1B/CCR2/IL7R	11	Module 5
GO:1902622	regulation of neutrophil migration	8/943	42/18866	0.000980194	0.00958769	0.00739914	SLAMF8/XCL1/NCKAP1L/C3AR1/C5AR1/DPP4/RAC2/MPP1	8	Module 5
GO:0071356	cellular response to tumor necrosis factor	28/943	297/18866	0.000989782	0.00966387	0.00745794	XCL1/TNFRSF9/AIM2/CHI3L1/BIRC3/CASP4/CASP1/THBS1/CCL8/CCL18/CCL5/CCL3/BRCA1/CARD8/LIMS1/TANK/ADAM17/STAT1/CLDN1/F2RL1/TNFAIP3/TNFRSF21/DCSTAMP/ASAH1/ST18/SYK/TNFSF15/TNFSF8	28	Module 5
GO:0010883	regulation of lipid storage	9/943	52/18866	0.000991935	0.00966731	0.00746059	NR1H3/OSBPL8/PPARG/OSBPL11/CD36/LPL/MSR1/PLIN2/ABCA1	9	Module 5
GO:0051092	positive regulation of NF-kappaB transcription factor activity	18/943	159/18866	0.00101461	0.009836	0.00759077	NLRP3/AIM2/PRKCQ/IL18/PRKCH/NOD2/TRIM25/MALT1/IL18RAP/NLRC4/IL1B/ITGB2/TFRC/TLR6/CD36/RIPK2/BTK/RAB7B	18	Module 5
GO:0001865	NK T cell differentiation	4/943	10/18866	0.00102206	0.009836	0.00759077	PSAP/ITK/PRDM1/TOX	4	Module 5
GO:0002887	negative regulation of myeloid leukocyte mediated immunity	4/943	10/18866	0.00102206	0.009836	0.00759077	FCGR2B/CD84/CD300A/CCR2	4	Module 5
GO:0032308	positive regulation of prostaglandin secretion	4/943	10/18866	0.00102206	0.009836	0.00759077	P2RX7/P2RX4/MAP2K6/IL1B	4	Module 5
GO:0034135	regulation of toll-like receptor 2 signaling pathway	4/943	10/18866	0.00102206	0.009836	0.00759077	TLR6/F2RL1/TNFAIP3/LYN	4	Module 5
GO:0034154	toll-like receptor 7 signaling pathway	4/943	10/18866	0.00102206	0.009836	0.00759077	PTPN22/PIK3AP1/SCIMP/HAVCR2	4	Module 5
GO:1903862	positive regulation of oxidative phosphorylation	4/943	10/18866	0.00102206	0.009836	0.00759077	CDK1/NUPR1/CCNB1/PGK1	4	Module 5
GO:0090022	regulation of neutrophil chemotaxis	7/943	33/18866	0.00103882	0.00997932	0.00770138	XCL1/NCKAP1L/C3AR1/C5AR1/DPP4/RAC2/MPP1	7	Module 5
GO:0035666	TRIF-dependent toll-like receptor signaling pathway	7/367	30/18866	1.37816e-06	0.00529627	0.00483227	UBE2D1/CHUK/BIRC2/CASP8/UBE2D3/CD14/TLR4	7	Module 7
GO:0002756	MyD88-independent toll-like receptor signaling pathway	7/367	34/18866	3.40583e-06	0.00654431	0.00597096	UBE2D1/CHUK/BIRC2/CASP8/UBE2D3/CD14/TLR4	7	Module 7
GO:0002755	MyD88-dependent toll-like receptor signaling pathway	7/367	36/18866	5.11096e-06	0.00654714	0.00597354	IRAK3/TLR2/TLR1/CD14/TLR4/TLR7/TLR8	7	Module 7
GO:0007033	vacuole organization	14/367	174/18866	8.16014e-06	0.00681433	0.00621733	STX12/CLN5/PSEN1/SPG11/VMP1/RALB/FEZ2/RAB1A/ATG3/TMEM165/FIG4/C9orf72/ATP6AP2/MTM1	14	Module 7
GO:0002224	toll-like receptor signaling pathway	13/367	152/18866	8.86589e-06	0.00681433	0.00621733	UBE2D1/CHUK/BIRC2/IRAK3/CASP8/TLR2/TLR1/UBE2D3/CD14/TLR4/TLR7/TLR8/RPS6KA3	13	Module 7
GO:0016236	macroautophagy	19/367	310/18866	1.14718e-05	0.00734772	0.00670398	STX12/GNAI3/RRAGC/TIGAR/DCN/PSEN1/ATP6V1D/DYNLL2/VMP1/VAMP8/RALB/FEZ2/RAB1A/ATG3/ATP6V1B2/ATP6V1C1/C9orf72/MTM1/LAMP2	19	Module 7
GO:0019884	antigen processing and presentation of exogenous antigen	14/367	185/18866	1.6408e-05	0.009008	0.00821881	CAPZA1/MR1/PSMB2/CHUK/PSMA1/CLEC4A/PSMA4/DYNLL2/VAMP8/PSME4/KIF3B/HLA-DPB1/CAPZA2/AP1S2	14	Module 7
GO:0042113	B cell activation	9/37	328/18866	1.05449e-08	8.4781e-06	7.04843e-06	LAX1/MS4A1/POU2AF1/CD27/CD79A/IGKC/XBP1/BANK1/MZB1	9	Module 12
GO:0030183	B cell differentiation	5/37	137/18866	6.7863e-06	0.00272809	0.00226805	MS4A1/POU2AF1/CD27/CD79A/XBP1	5	Module 12
