# Supplementary material for: Bioinformatic Analysis Revealed the Essential Regulatory Genes and Pathways of Early and Advanced Atherosclerotic Plaque in Humans
Source: Cells. 2022 Dec 8;11(24):3976. doi: 10.3390/cells11243976 (PMC9776921; doi:10.3390/cells11243976)
Supplement: Supplementary file 1 [file cells-11-03976-s001.zip › Table S6.xlsx]

## Sheet: Sheet1
Table S6 The results of modular differential connectivity analysis based on dataset of early and advanced stage
Modules	Size	MDC	0.05	0.95	Sig	Pathway
Module1	2184	1.23	0.69	1.42	N	synaptic transmission
Module2	1759	1.32	0.68	1.48	N	proteasomal protein catabolic process
Module3	812	1.14	0.67	1.42	N	response to virus
Module4	685	0.79	0.82	1.2	Y	Immune-related processes
Module5	421	0.98	0.66	1.44	N	muscle system process
Module6	329	0.72	0.68	1.46	N	muscle tissue development
Module7	264	0.93	0.75	1.3	N	protein target to reticulum
Module8	156	1.03	0.66	1.39	N	NA
Module9	95	1.32	0.68	1.37	N	NA
Module10	86	0.73	0.67	1.42	N	NA
Module11	84	0.51	0.61	1.66	Y	B cell activation
Module12	72	1.08	0.65	1.69	N	synaptic transmission
Module13	47	1.35	0.7	1.38	N	extracellular matrix organization
Module14	38	0.95	0.69	1.42	N	Golgi to plasma membrane protein transport
Module15	33	0.49	0.73	1.27	Y	nuclear division
