# Supplementary material for: Bioinformatic Analysis Revealed the Essential Regulatory Genes and Pathways of Early and Advanced Atherosclerotic Plaque in Humans
Source: Cells. 2022 Dec 8;11(24):3976. doi: 10.3390/cells11243976 (PMC9776921; doi:10.3390/cells11243976)
Supplement: Supplementary file 1 [file cells-11-03976-s001.zip › Table S7.xlsx]

## Sheet: Sheet1
Table S7 The enrichment pathways of module 4, 11 and 15 using GO analysis
ID	Description	GeneRatio	BgRatio	pvalue	p.adjust	qvalue	geneID	Count	Modules
GO:0002283	neutrophil activation involved in immune response	92/608	490/18866	2.11872e-44	9.82875e-41	7.26833e-41	HSPA6/PTPRC/ITGAL/DOCK2/OSCAR/FCER1G/IDH1/SLC11A1/ITGB2/ASAH1/LYZ/RNASET2/LGALS3/VNN1/ITGAX/FCGR2A/S100A11/CTSA/GRN/NPC2/FTH1/CTSD/CTSB/PSAP/ATP6V0C/SDCBP/CSTB/CTSC/CD14/B2M/PRDX4/HEXB/CTSH/FABP5/PRKCD/VAMP8/SERPINA1/FUCA1/ANPEP/SIRPA/CTSS/CYBA/STK10/RHOG/KCNAB2/CD53/IQGAP2/CYBB/MMP9/FCGR3B/TYROBP/IMPDH1/SLC2A5/ALOX5/TLR2/MNDA/FPR1/ITGAM/HK3/CR1/PTAFR/GALNS/PTPN6/SYK/LILRB2/LILRA2/AMPD3/LAIR1/FGR…	92	Module4
GO:0043312	neutrophil degranulation	91/608	487/18866	9.923e-44	2.30164e-40	1.70206e-40	HSPA6/PTPRC/ITGAL/DOCK2/OSCAR/FCER1G/IDH1/SLC11A1/ITGB2/ASAH1/LYZ/RNASET2/LGALS3/VNN1/ITGAX/FCGR2A/S100A11/CTSA/GRN/NPC2/FTH1/CTSD/CTSB/PSAP/ATP6V0C/SDCBP/CSTB/CTSC/CD14/B2M/PRDX4/HEXB/CTSH/FABP5/PRKCD/VAMP8/SERPINA1/FUCA1/ANPEP/SIRPA/CTSS/CYBA/STK10/RHOG/KCNAB2/CD53/IQGAP2/CYBB/MMP9/FCGR3B/TYROBP/IMPDH1/SLC2A5/ALOX5/TLR2/MNDA/FPR1/ITGAM/HK3/CR1/PTAFR/GALNS/PTPN6/SYK/LILRB2/AMPD3/LAIR1/FGR/MAN2B1…	91	Module4
GO:0042110	T cell activation	76/608	483/18866	3.18335e-31	4.92251e-28	3.64018e-28	CCL5/PTPRC/GPNMB/ITGAL/HAVCR2/DOCK2/CLEC7A/CD80/APBB1IP/FCER1G/SLC11A1/CXADR/CD209/LGALS3/VNN1/CD74/LILRB4/PSAP/HLA-DPB1/B2M/CTSL/CSK/CTPS1/LYN/ICAM1/PSMB10/SIRPA/IL4R/LGALS9/CD4/DPP4/HLA-DMB/RUNX3/CD83/VSIG4/PTGER4/SASH3/PTPN2/RHOH/WAS/GPR183/CD86/IL7R/VAV1/CR1/IL18/HLA-DOA/CCR7/PIK3CG/CD28/PTPN6/NLRP3/P2RX7/LILRB1/TNFSF8/RAC2/SYK/LILRB2/AIF1/LCP1/CORO1A/RIPK2/NCKAP1L/CD300A/FCGR2B/ITK/HLA-DPA1/…	76	Module4
GO:0007159	leukocyte cell-cell adhesion	63/608	364/18866	2.41944e-28	2.80595e-25	2.07499e-25	CCL5/PTPRC/GPNMB/ITGAL/HAVCR2/CD80/ITGB2/CD209/LGALS3/VNN1/CD74/CX3CR1/LILRB4/HLA-DPB1/CSK/LYN/ICAM1/SIRPA/STK10/IL4R/LGALS9/CD4/DPP4/HLA-DMB/RUNX3/CD83/ALOX5/VSIG4/SASH3/PTPN2/RHOH/CD86/IL7R/ITGA4/VAV1/PTAFR/IL18/CCR7/CD28/PTPN6/NLRP3/LILRB1/RAC2/SYK/LILRB2/AIF1/CORO1A/SLC39A8/RIPK2/NCKAP1L/SELPLG/CD300A/OLR1/FCGR2B/HLA-DPA1/TNFRSF21/ADTRP/DUSP10/PYCARD/FERMT3/TNFSF13B/DOCK8/PAG1	63	Module4
GO:0046651	lymphocyte proliferation	52/608	283/18866	8.56121e-25	7.94309e-22	5.87389e-22	CCL5/PTPRC/GPNMB/HAVCR2/DOCK2/CD80/SLC11A1/CD209/LGALS3/CD74/INPP5D/HLA-DPB1/PRKCD/CTPS1/LYN/PSMB10/LGALS9/CD4/HLA-DMB/TYROBP/IMPDH1/VSIG4/SASH3/MNDA/GPR183/BTK/CD86/IL7R/CD180/IL18/PIK3CG/CD28/PTPN6/P2RX7/LILRB1/TNFSF8/RAC2/SYK/LILRB2/AIF1/CORO1A/RIPK2/NCKAP1L/CD300A/LST1/FCGR2B/HLA-DPA1/TNFRSF21/VAV3/PYCARD/TNFSF13B/DOCK8	52	Module4
GO:0032943	mononuclear cell proliferation	52/608	286/18866	1.4332e-24	1.1081e-21	8.19438e-22	CCL5/PTPRC/GPNMB/HAVCR2/DOCK2/CD80/SLC11A1/CD209/LGALS3/CD74/INPP5D/HLA-DPB1/PRKCD/CTPS1/LYN/PSMB10/LGALS9/CD4/HLA-DMB/TYROBP/IMPDH1/VSIG4/SASH3/MNDA/GPR183/BTK/CD86/IL7R/CD180/IL18/PIK3CG/CD28/PTPN6/P2RX7/LILRB1/TNFSF8/RAC2/SYK/LILRB2/AIF1/CORO1A/RIPK2/NCKAP1L/CD300A/LST1/FCGR2B/HLA-DPA1/TNFRSF21/VAV3/PYCARD/TNFSF13B/DOCK8	52	Module4
GO:0070661	leukocyte proliferation	54/608	313/18866	2.46573e-24	1.63407e-21	1.20839e-21	CCL5/PTPRC/GPNMB/HAVCR2/DOCK2/CD80/SLC11A1/CD209/LGALS3/CD74/INPP5D/HLA-DPB1/PRKCD/CTPS1/LYN/PSMB10/CSF1R/LGALS9/CD4/HLA-DMB/TYROBP/IMPDH1/VSIG4/SASH3/MNDA/GPR183/BTK/CD86/IL7R/CD180/IL18/PIK3CG/CD28/PTPN6/P2RX7/LILRB1/TNFSF8/RAC2/SYK/LILRB2/AIF1/CORO1A/RIPK2/NCKAP1L/CD300A/LST1/FCGR2B/HLA-DPA1/TNFRSF21/VAV3/TREM2/PYCARD/TNFSF13B/DOCK8	54	Module4
GO:1903037	regulation of leukocyte cell-cell adhesion	55/608	329/18866	4.46293e-24	2.58794e-21	1.91378e-21	CCL5/PTPRC/GPNMB/HAVCR2/CD80/ITGB2/CD209/LGALS3/VNN1/CD74/LILRB4/HLA-DPB1/CSK/LYN/ICAM1/SIRPA/IL4R/LGALS9/CD4/DPP4/HLA-DMB/RUNX3/CD83/ALOX5/VSIG4/SASH3/PTPN2/RHOH/CD86/IL7R/ITGA4/VAV1/PTAFR/IL18/CCR7/CD28/PTPN6/NLRP3/LILRB1/SYK/LILRB2/AIF1/CORO1A/RIPK2/NCKAP1L/CD300A/FCGR2B/HLA-DPA1/TNFRSF21/ADTRP/DUSP10/PYCARD/TNFSF13B/DOCK8/PAG1	55	Module4
GO:1903039	positive regulation of leukocyte cell-cell adhesion	46/608	235/18866	3.01378e-23	1.48483e-20	1.09803e-20	CCL5/PTPRC/HAVCR2/CD80/ITGB2/CD209/VNN1/CD74/LILRB4/HLA-DPB1/CSK/LYN/ICAM1/SIRPA/IL4R/LGALS9/CD4/DPP4/HLA-DMB/RUNX3/CD83/ALOX5/SASH3/RHOH/CD86/IL7R/ITGA4/VAV1/PTAFR/IL18/CCR7/CD28/PTPN6/NLRP3/LILRB1/SYK/LILRB2/AIF1/CORO1A/RIPK2/NCKAP1L/HLA-DPA1/DUSP10/PYCARD/TNFSF13B/DOCK8	46	Module4
GO:0050867	positive regulation of cell activation	61/608	421/18866	3.20075e-23	1.48483e-20	1.09803e-20	CCL5/PTPRC/HAVCR2/CLEC7A/CD80/FCER1G/ITGB2/CD209/VNN1/CD74/INPP5D/LILRB4/HLA-DPB1/CTSC/CSK/VAMP8/LYN/SIRPA/IL4R/LGALS9/RPS6KA1/PLEK/CD4/DPP4/HLA-DMB/CEBPA/TYROBP/RUNX3/CD83/SASH3/RHOH/GPR183/BTK/CD86/ITGAM/IL7R/ADORA2B/VAV1/PTAFR/IL18/CCR7/CD28/PTPN6/NLRP3/LILRB1/SYK/LILRB2/AIF1/LILRA2/FGR/CORO1A/RIPK2/NCKAP1L/TNFSF13/HLA-DPA1/DUSP10/VAV3/TREM2/PYCARD/TNFSF13B/DOCK8	61	Module4
GO:0050863	regulation of T cell activation	54/608	332/18866	4.54173e-23	1.91537e-20	1.41641e-20	CCL5/PTPRC/GPNMB/HAVCR2/CD80/CD209/LGALS3/VNN1/CD74/LILRB4/HLA-DPB1/CSK/LYN/SIRPA/IL4R/LGALS9/CD4/DPP4/HLA-DMB/RUNX3/CD83/VSIG4/SASH3/PTPN2/RHOH/CD86/IL7R/VAV1/CR1/IL18/HLA-DOA/CCR7/CD28/PTPN6/NLRP3/LILRB1/TNFSF8/RAC2/SYK/LILRB2/AIF1/CORO1A/RIPK2/NCKAP1L/CD300A/FCGR2B/HLA-DPA1/TNFRSF21/DUSP10/PRDM1/PYCARD/TNFSF13B/DOCK8/PAG1	54	Module4
GO:0022407	regulation of cell-cell adhesion	62/608	439/18866	5.46929e-23	2.11434e-20	1.56355e-20	CCL5/PTPRC/GPNMB/HAVCR2/CD80/ITGB2/CD209/LGALS3/VNN1/CD74/LILRB4/HLA-DPB1/CSK/PRKCD/LYN/ICAM1/SIRPA/IL4R/LGALS9/CD4/DPP4/HLA-DMB/RUNX3/CD83/ALOX5/VSIG4/SASH3/PTPN2/RHOH/CD86/IL7R/ITGA4/VAV1/PTAFR/IL18/CCR7/CD28/PTPN6/NLRP3/LILRB1/EFNA5/SYK/LILRB2/AIF1/CORO1A/RIPK2/NCKAP1L/CD300A/PLAUR/FCGR2B/HLA-DPA1/SERPINE2/IL1RN/TNFRSF21/ADTRP/DUSP10/FXYD5/PYCARD/FERMT3/TNFSF13B/DOCK8/PAG1	62	Module4
GO:0002696	positive regulation of leukocyte activation	58/608	406/18866	8.29336e-22	2.95945e-19	2.18851e-19	CCL5/PTPRC/HAVCR2/CLEC7A/CD80/FCER1G/ITGB2/CD209/VNN1/CD74/INPP5D/LILRB4/HLA-DPB1/CTSC/CSK/VAMP8/LYN/SIRPA/IL4R/LGALS9/CD4/DPP4/HLA-DMB/CEBPA/TYROBP/RUNX3/CD83/SASH3/RHOH/GPR183/BTK/CD86/ITGAM/IL7R/ADORA2B/VAV1/PTAFR/IL18/CCR7/CD28/PTPN6/NLRP3/LILRB1/SYK/LILRB2/AIF1/FGR/CORO1A/RIPK2/NCKAP1L/TNFSF13/HLA-DPA1/DUSP10/VAV3/TREM2/PYCARD/TNFSF13B/DOCK8	58	Module4
GO:0060326	cell chemotaxis	50/608	311/18866	3.33681e-21	1.10568e-18	8.17644e-19	CCL5/PDGFRA/FCER1G/ITGA9/ITGB2/CXADR/LGALS3/DOCK4/NRP1/PARVA/EDN1/CD74/CX3CR1/CXCL2/LGMN/PRKCD/LYN/ABCC1/MPP1/CSF1R/RHOG/LGALS9/ARRB2/DPP4/CCL4/GPSM3/ALOX5/CCR1/GPR183/CCL20/PLA2G7/VAV1/CCR7/PIK3CG/TNFRSF11A/RAC2/SYK/FGFR1/AIF1/CORO1A/CXCR4/NCKAP1L/C3AR1/CCL18/VAV3/BIN2/SLAMF8/C5AR1/HSD3B7/CXCL16	50	Module4
GO:0022409	positive regulation of cell-cell adhesion	47/608	279/18866	7.35693e-21	2.27525e-18	1.68254e-18	CCL5/PTPRC/HAVCR2/CD80/ITGB2/CD209/VNN1/CD74/LILRB4/HLA-DPB1/CSK/LYN/ICAM1/SIRPA/IL4R/LGALS9/CD4/DPP4/HLA-DMB/RUNX3/CD83/ALOX5/SASH3/RHOH/CD86/IL7R/ITGA4/VAV1/PTAFR/IL18/CCR7/CD28/PTPN6/NLRP3/LILRB1/SYK/LILRB2/AIF1/CORO1A/RIPK2/NCKAP1L/PLAUR/HLA-DPA1/DUSP10/PYCARD/TNFSF13B/DOCK8	47	Module4
GO:0050870	positive regulation of T cell activation	41/608	214/18866	1.77984e-20	5.16041e-18	3.81611e-18	CCL5/PTPRC/HAVCR2/CD80/CD209/VNN1/CD74/LILRB4/HLA-DPB1/CSK/LYN/SIRPA/IL4R/LGALS9/CD4/DPP4/HLA-DMB/RUNX3/CD83/SASH3/RHOH/CD86/IL7R/VAV1/IL18/CCR7/CD28/PTPN6/NLRP3/LILRB1/SYK/LILRB2/AIF1/CORO1A/RIPK2/NCKAP1L/HLA-DPA1/DUSP10/PYCARD/TNFSF13B/DOCK8	41	Module4
GO:0050670	regulation of lymphocyte proliferation	41/608	219/18866	4.36479e-20	1.19107e-17	8.80795e-18	CCL5/PTPRC/GPNMB/HAVCR2/CD80/CD209/LGALS3/CD74/INPP5D/HLA-DPB1/LYN/LGALS9/CD4/HLA-DMB/TYROBP/VSIG4/SASH3/MNDA/GPR183/BTK/CD86/IL18/CD28/PTPN6/LILRB1/TNFSF8/RAC2/SYK/LILRB2/AIF1/CORO1A/RIPK2/NCKAP1L/CD300A/LST1/FCGR2B/HLA-DPA1/TNFRSF21/VAV3/PYCARD/TNFSF13B	41	Module4
GO:0032944	regulation of mononuclear cell proliferation	41/608	221/18866	6.20268e-20	1.59857e-17	1.18214e-17	CCL5/PTPRC/GPNMB/HAVCR2/CD80/CD209/LGALS3/CD74/INPP5D/HLA-DPB1/LYN/LGALS9/CD4/HLA-DMB/TYROBP/VSIG4/SASH3/MNDA/GPR183/BTK/CD86/IL18/CD28/PTPN6/LILRB1/TNFSF8/RAC2/SYK/LILRB2/AIF1/CORO1A/RIPK2/NCKAP1L/CD300A/LST1/FCGR2B/HLA-DPA1/TNFRSF21/VAV3/PYCARD/TNFSF13B	41	Module4
GO:0070663	regulation of leukocyte proliferation	42/608	240/18866	2.13041e-19	5.20156e-17	3.84654e-17	CCL5/PTPRC/GPNMB/HAVCR2/CD80/CD209/LGALS3/CD74/INPP5D/HLA-DPB1/LYN/CSF1R/LGALS9/CD4/HLA-DMB/TYROBP/VSIG4/SASH3/MNDA/GPR183/BTK/CD86/IL18/CD28/PTPN6/LILRB1/TNFSF8/RAC2/SYK/LILRB2/AIF1/CORO1A/RIPK2/NCKAP1L/CD300A/LST1/FCGR2B/HLA-DPA1/TNFRSF21/VAV3/PYCARD/TNFSF13B	42	Module4
GO:1902105	regulation of leukocyte differentiation	45/608	290/18866	1.44144e-18	3.34342e-16	2.47245e-16	PTPRC/CD80/VNN1/CD74/INPP5D/LILRB4/TRIB1/LYN/HCLS1/IL4R/LGALS9/CD4/HMGB3/TYROBP/GPR137B/RUNX3/CD83/SASH3/PTPN2/RHOH/CCR1/BTK/CD86/IL7R/CR1/IL18/HLA-DOA/CD28/PTPN6/NLRP3/LILRB1/SYK/LILRB2/ATP6AP1/RIPK2/NCKAP1L/LILRB3/FCGR2B/EVI2B/DUSP10/PRDM1/MAFB/SLAMF8/TREM2/C1QC	45	Module4
GO:0042098	T cell proliferation	37/608	195/18866	1.90397e-18	4.20595e-16	3.11029e-16	CCL5/PTPRC/GPNMB/HAVCR2/DOCK2/CD80/SLC11A1/CD209/LGALS3/HLA-DPB1/CTPS1/PSMB10/LGALS9/CD4/HLA-DMB/VSIG4/SASH3/CD86/IL18/PIK3CG/CD28/PTPN6/P2RX7/LILRB1/TNFSF8/RAC2/SYK/LILRB2/AIF1/CORO1A/RIPK2/NCKAP1L/HLA-DPA1/TNFRSF21/PYCARD/TNFSF13B/DOCK8	37	Module4
GO:0002697	regulation of immune effector process	57/608	470/18866	5.08957e-18	1.07321e-15	7.93632e-16	PTPRC/HAVCR2/CD80/C2/FCER1G/ITGB2/CFI/LGALS3/CD74/GRN/TMBIM6/B2M/VAMP8/LYN/ICAM1/C1QB/IL4R/LGALS9/ARRB2/HLA-DMB/TYROBP/MMP12/VSIG4/SASH3/WAS/BTK/CD86/ITGAM/IL7R/ADORA2B/CD84/VAV1/CR1/PTAFR/IL18/CD28/PTPN6/NLRP3/P2RX7/LILRB1/RAC2/SYK/FGR/CADM1/RIPK2/SERPINB9/C3AR1/CD300A/TNFSF13/FCGR2B/C1R/DUSP10/C1QA/SLAMF8/C5AR1/PYCARD/C1QC	57	Module4
GO:0030595	leukocyte chemotaxis	39/608	232/18866	1.80275e-17	3.63607e-15	2.68886e-15	CCL5/FCER1G/ITGA9/ITGB2/CXADR/LGALS3/EDN1/CD74/CXCL2/LGMN/LYN/MPP1/CSF1R/LGALS9/DPP4/CCL4/GPSM3/ALOX5/CCR1/GPR183/CCL20/PLA2G7/VAV1/CCR7/PIK3CG/TNFRSF11A/RAC2/SYK/AIF1/CORO1A/CXCR4/NCKAP1L/C3AR1/CCL18/VAV3/SLAMF8/C5AR1/HSD3B7/CXCL16	39	Module4
GO:0097529	myeloid leukocyte migration	38/608	222/18866	2.50928e-17	4.85023e-15	3.58673e-15	CCL5/FCER1G/ITGA9/ITGB2/CXADR/LGALS3/EDN1/CD74/CX3CR1/CXCL2/LGMN/LYN/SIRPA/MPP1/CSF1R/RHOG/DPP4/CCL4/PTGER4/RHOH/CCR1/CCL20/PLA2G7/VAV1/CCR7/PIK3CG/TNFRSF11A/RAC2/SYK/AIF1/NCKAP1L/C3AR1/CCL18/CD300A/VAV3/SLAMF8/TREM2/C5AR1	38	Module4
GO:0045785	positive regulation of cell adhesion	53/608	428/18866	3.22137e-17	5.97758e-15	4.4204e-15	CCL5/PTPRC/HAVCR2/CD80/APBB1IP/ITGB2/CD209/VNN1/NRP1/CD74/LILRB4/HLA-DPB1/CSK/LYN/ICAM1/SIRPA/IL4R/LGALS9/CD4/RREB1/DPP4/HLA-DMB/RUNX3/CD83/ALOX5/SASH3/RHOH/CD86/IL7R/ITGA4/VAV1/PTAFR/IL18/CCR7/CD28/PTPN6/NLRP3/LILRB1/IBSP/SYK/LILRB2/AIF1/CORO1A/RIPK2/NCKAP1L/PLAUR/HLA-DPA1/RRAS/DUSP10/VAV3/PYCARD/TNFSF13B/DOCK8	53	Module4
GO:0051251	positive regulation of lymphocyte activation	48/608	357/18866	3.94564e-17	7.03993e-15	5.20601e-15	CCL5/PTPRC/HAVCR2/CLEC7A/CD80/CD209/VNN1/CD74/INPP5D/LILRB4/HLA-DPB1/CSK/LYN/SIRPA/IL4R/LGALS9/CD4/DPP4/HLA-DMB/TYROBP/RUNX3/CD83/SASH3/RHOH/GPR183/BTK/CD86/IL7R/VAV1/IL18/CCR7/CD28/PTPN6/NLRP3/LILRB1/SYK/LILRB2/AIF1/CORO1A/RIPK2/NCKAP1L/TNFSF13/HLA-DPA1/DUSP10/VAV3/PYCARD/TNFSF13B/DOCK8	48	Module4
GO:0002683	negative regulation of immune system process	55/608	463/18866	5.11753e-17	8.79267e-15	6.50215e-15	PTPRC/GPNMB/HAVCR2/CD80/FCER1G/SAMSN1/LGALS3/MEIS1/CD74/INPP5D/LILRB4/GRN/GPX1/TMBIM6/NFKBIA/TRIB1/LYN/IL4R/LGALS9/ARRB2/DPP4/HMGB3/NMI/TYROBP/GPR137B/RUNX3/MMP12/VSIG4/PTGER4/PTPN2/MNDA/BTK/CD86/IL7R/CD84/CR1/HLA-DOA/PTPN6/LILRB1/LILRB2/FGR/SERPINB9/CD300A/LILRB3/LST1/FCGR2B/TNFRSF21/ADTRP/DUSP10/LPXN/MAFB/SLAMF8/PARP14/C1QC/PAG1	55	Module4
GO:1903706	regulation of hemopoiesis	57/608	498/18866	7.37172e-17	1.22134e-14	9.03175e-15	SCIN/PTPRC/FOXC1/CD80/LGALS3/VNN1/MEIS1/CD74/INPP5D/LILRB4/PSME1/NFKBIA/B2M/TRIB1/LYN/PSMB10/HCLS1/IL4R/LGALS9/CD4/HMGB3/TYROBP/GPR137B/RUNX3/PSMB9/CD83/SASH3/PTPN2/RHOH/CCR1/BTK/CD86/IL7R/CR1/IL18/HLA-DOA/CD28/PTPN6/NLRP3/LILRB1/SYK/LILRB2/ATP6AP1/PSMB8/RIPK2/NCKAP1L/LILRB3/FCGR2B/EVI2B/DUSP10/PRDM1/MAFB/SLAMF8/TREM2/MOV10/C1QC/MTURN	57	Module4
GO:0019882	antigen processing and presentation	38/608	232/18866	1.15526e-16	1.84803e-14	1.36661e-14	FCER1G/SLC11A1/TAPBP/CD209/CD74/CTSD/PSME1/PSAP/HLA-DPB1/LGMN/B2M/CTSL/AP2S1/CTSH/VAMP8/ICAM1/PSMB10/CTSS/CYBA/DYNC1LI2/CYBB/HLA-DMB/PSMB9/NCF4/WAS/HLA-DOA/CCR7/LILRB2/HLA-DRA/PSMB8/NCF2/FCGR2B/HLA-DPA1/NCF1/FCGR1B/HLA-DMA/TREM2/PYCARD	38	Module4
GO:0006909	phagocytosis	49/608	382/18866	1.27586e-16	1.9729e-14	1.45896e-14	PTPRC/ITGAL/DOCK2/CLEC7A/C2/FCER1G/ARHGAP25/SLC11A1/ITGB2/FCGR2A/ABCA1/CD14/ARPC1B/CSK/PRKCD/LYN/SIRPA/CYBA/RHOG/IRF8/IL2RG/TYROBP/TLR2/RHOH/NCF4/WAS/ITGAM/MARCO/ANXA11/VAV1/P2RX7/RAC2/SYK/AIF1/HCK/MSR1/FGR/ARPC3/CORO1A/NCKAP1L/CD300A/NCF2/FCGR2B/MYO1C/VAV3/BIN2/TREM2/COLEC12/PYCARD	49	Module4
GO:0030098	lymphocyte differentiation	48/608	368/18866	1.35126e-16	2.0221e-14	1.49534e-14	PTPRC/DOCK2/CD80/FCER1G/VNN1/CMTM7/CD74/INPP5D/LILRB4/PSAP/B2M/CTSL/IL4R/LGALS9/CD4/HMGB3/MFNG/RUNX3/CD83/PTGER4/SASH3/PTPN2/RHOH/GPR183/BTK/CD86/IL7R/ITGA4/VAV1/CR1/IL18/HLA-DOA/CCR7/CD28/PTPN6/NLRP3/TNFSF8/SYK/LILRB2/RIPK2/NCKAP1L/FCGR2B/ITK/DUSP10/PRDM1/MAFB/SLAMF8/CLEC4E	48	Module4
GO:0002237	response to molecule of bacterial origin	47/608	356/18866	1.75997e-16	2.5514e-14	1.88675e-14	CCL5/HAVCR2/CD80/SLC11A1/EDN1/CX3CR1/CXCL2/ABCA1/NFKBIA/CD14/B2M/TRIB1/LYN/ICAM1/MAPKAPK3/SIRPA/LGALS9/IRF8/MGST2/MRC1/ACP5/PTGER4/IL10RA/TLR2/KMO/CD86/LY86/CASP1/CD180/TIMP4/PTAFR/IL18/CCR7/TNFRSF11A/NLRP3/P2RX7/LILRB1/LILRB2/LILRA2/HCK/RIPK2/TLR1/FCGR2B/DUSP10/TREM2/C5AR1/PYCARD	47	Module4
GO:0002703	regulation of leukocyte mediated immunity	36/608	211/18866	1.96469e-16	2.76188e-14	2.0424e-14	PTPRC/HAVCR2/FCER1G/ITGB2/B2M/VAMP8/LYN/ICAM1/IL4R/LGALS9/ARRB2/TYROBP/SASH3/WAS/BTK/ITGAM/IL7R/ADORA2B/CD84/VAV1/CR1/PTAFR/IL18/CD28/PTPN6/NLRP3/P2RX7/LILRB1/RAC2/SYK/FGR/CADM1/SERPINB9/CD300A/TNFSF13/FCGR2B	36	Module4
GO:0001819	positive regulation of cytokine production	53/608	447/18866	2.11979e-16	2.89227e-14	2.13883e-14	PTPRC/NLRC4/HAVCR2/CLEC7A/CD80/FCER1G/SLC11A1/CD74/HLA-DPB1/CD14/LUM/B2M/ROCK2/CYBA/LGALS9/CD4/IRF8/TYROBP/GPSM3/CD83/PTGER4/SASH3/TLR2/MNDA/CD86/ADORA2B/CASP1/PTAFR/IL18/CCR7/CD28/NLRP3/P2RX7/LILRB1/SYK/LILRB2/AIF1/LILRA2/FGR/CADM1/RIPK2/C3AR1/MAPK13/TLR5/TLR1/HLA-DPA1/TREM2/CLEC4E/CLEC5A/C5AR1/TLR8/PYCARD/GBP5	53	Module4
GO:0002685	regulation of leukocyte migration	36/608	212/18866	2.2963e-16	3.04358e-14	2.25072e-14	CCL5/LGALS3/EDN1/CD74/CX3CR1/LGMN/LYN/ICAM1/MPP1/STK10/CSF1R/RHOG/LGALS9/DPP4/CCL4/GPSM3/PTGER4/RHOH/CCR1/CCL20/ITGA4/PLA2G7/PTAFR/CCR7/RAC2/AIF1/ECM1/NCKAP1L/C3AR1/CD300A/ADTRP/SLAMF8/TREM2/C5AR1/PYCARD/DOCK8	36	Module4
GO:0030217	T cell differentiation	39/608	253/18866	3.786e-16	4.87868e-14	3.60777e-14	PTPRC/DOCK2/CD80/FCER1G/VNN1/CD74/LILRB4/PSAP/B2M/CTSL/IL4R/LGALS9/CD4/RUNX3/CD83/PTGER4/SASH3/PTPN2/RHOH/GPR183/CD86/IL7R/VAV1/CR1/IL18/HLA-DOA/CCR7/CD28/NLRP3/TNFSF8/SYK/LILRB2/RIPK2/NCKAP1L/ITK/DUSP10/PRDM1/MAFB/CLEC4E	39	Module4
GO:0032496	response to lipopolysaccharide	44/608	334/18866	1.81879e-15	2.28037e-13	1.68633e-13	CCL5/HAVCR2/CD80/SLC11A1/EDN1/CX3CR1/CXCL2/ABCA1/NFKBIA/CD14/TRIB1/LYN/ICAM1/MAPKAPK3/SIRPA/LGALS9/IRF8/MGST2/MRC1/ACP5/PTGER4/IL10RA/TLR2/KMO/CD86/LY86/CASP1/CD180/TIMP4/PTAFR/IL18/CCR7/TNFRSF11A/NLRP3/P2RX7/LILRB1/LILRB2/LILRA2/HCK/RIPK2/DUSP10/TREM2/C5AR1/PYCARD	44	Module4
GO:0034341	response to interferon-gamma	34/608	202/18866	2.08756e-15	2.51404e-13	1.85913e-13	CCL5/SLC11A1/EDN1/HLA-DPB1/IFNGR2/B2M/PRKCD/ICAM1/SP100/SIRPA/DAPK1/LGALS9/NMI/IRF8/CCL4/KYNU/MRC1/TLR2/PTPN2/WAS/CCL20/CASP1/PTAFR/AIF1/HCK/HLA-DRA/CCL18/HLA-DPA1/TRIM22/FCGR1B/MYO1C/CXCL16/PARP14/GBP5	34	Module4
GO:0045088	regulation of innate immune response	42/608	307/18866	2.11355e-15	2.51404e-13	1.85913e-13	CCL5/NLRC4/HAVCR2/FCER1G/CD209/GRN/PSME1/IFNGR2/PRKCD/LYN/PSMB10/HEXIM1/LGALS9/APOE/ARRB2/HMGB3/NMI/PSMB9/MMP12/VSIG4/PTPN2/MNDA/VAV1/CR1/PTPN6/LILRB1/SYK/LILRA2/HCK/FGR/CADM1/PSMB8/SERPINB9/FCGR2B/DUSP10/SLAMF8/TREM2/CLEC4E/TLR8/PYCARD/PARP14/GBP5	42	Module4
GO:0031349	positive regulation of defense response	47/608	385/18866	3.75877e-15	4.35923e-13	3.22364e-13	CCL5/NLRC4/HAVCR2/CLEC7A/FCER1G/CD209/GRN/PSME1/CTSC/NFKBIA/PRKCD/VAMP8/LYN/PSMB10/ABCC1/HEXIM1/CYBA/HMGB3/CEBPA/MGST2/GPSM3/PSMB9/MMP12/PTGER4/TLR2/MNDA/BTK/ADORA2B/PLA2G7/VAV1/IL18/CCR7/PIK3CG/CD28/TNFRSF11A/SYK/LILRA2/HCK/CADM1/PSMB8/RIPK2/MAPK13/TREM2/CLEC4E/TLR8/PYCARD/GBP5	47	Module4
GO:1902107	positive regulation of leukocyte differentiation	30/608	159/18866	3.97253e-15	4.49477e-13	3.32387e-13	PTPRC/CD80/VNN1/CD74/INPP5D/LILRB4/TRIB1/HCLS1/IL4R/LGALS9/CD4/TYROBP/RUNX3/CD83/SASH3/RHOH/CCR1/BTK/CD86/IL7R/IL18/NLRP3/SYK/LILRB2/ATP6AP1/RIPK2/NCKAP1L/EVI2B/DUSP10/TREM2	30	Module4
GO:0050866	negative regulation of cell activation	34/608	207/18866	4.4456e-15	4.91027e-13	3.63113e-13	PTPRC/GPNMB/HAVCR2/CD80/PDGFRA/SAMSN1/LGALS3/CD74/INPP5D/GRN/PRKCD/LYN/IL4R/LGALS9/APOE/HMGB3/TYROBP/RUNX3/VSIG4/PTPN2/MNDA/BTK/CD86/CD84/PTPN6/LILRB1/LILRB2/FGR/CD300A/LST1/FCGR2B/SERPINE2/TNFRSF21/PAG1	34	Module4
GO:0002429	immune response-activating cell surface receptor signaling pathway	53/608	481/18866	4.73328e-15	4.99039e-13	3.69038e-13	PTPRC/FCER1G/KLHL6/CD209/LGALS3/FCGR2A/INPP5D/LILRB4/PSME1/HLA-DPB1/ARPC1B/CSK/PRKCD/LYN/PSMB10/CD4/PSMB9/KCNN4/PTPN2/MNDA/FPR1/LCP2/WAS/BTK/VAV1/CR1/CCR7/CD28/PTPN6/SYK/THEMIS2/LILRA2/HCK/FGR/ARPC3/HLA-DRA/PSMB8/RIPK2/NCKAP1L/C3AR1/CD300A/FCGR2B/ITK/LAT2/HLA-DPA1/FPR3/TNFRSF21/MYO1C/LPXN/VAV3/CLEC4E/C5AR1/PAG1	53	Module4
GO:0002757	immune response-activating signal transduction	53/608	481/18866	4.73328e-15	4.99039e-13	3.69038e-13	PTPRC/FCER1G/KLHL6/CD209/LGALS3/FCGR2A/INPP5D/LILRB4/PSME1/HLA-DPB1/ARPC1B/CSK/PRKCD/LYN/PSMB10/CD4/PSMB9/KCNN4/PTPN2/MNDA/FPR1/LCP2/WAS/BTK/VAV1/CR1/CCR7/CD28/PTPN6/SYK/THEMIS2/LILRA2/HCK/FGR/ARPC3/HLA-DRA/PSMB8/RIPK2/NCKAP1L/C3AR1/CD300A/FCGR2B/ITK/LAT2/HLA-DPA1/FPR3/TNFRSF21/MYO1C/LPXN/VAV3/CLEC4E/C5AR1/PAG1	53	Module4
GO:0097530	granulocyte migration	29/608	150/18866	5.87386e-15	6.0553e-13	4.47787e-13	CCL5/FCER1G/ITGA9/ITGB2/CXADR/LGALS3/EDN1/CD74/CXCL2/MPP1/CSF1R/RHOG/DPP4/CCL4/PTGER4/RHOH/CCL20/VAV1/CCR7/PIK3CG/RAC2/SYK/NCKAP1L/C3AR1/CCL18/CD300A/VAV3/SLAMF8/C5AR1	29	Module4
GO:1990266	neutrophil migration	26/608	122/18866	1.31513e-14	1.32628e-12	9.80777e-13	CCL5/FCER1G/ITGA9/ITGB2/CXADR/LGALS3/EDN1/CD74/CXCL2/MPP1/RHOG/DPP4/CCL4/RHOH/CCL20/VAV1/CCR7/PIK3CG/RAC2/SYK/NCKAP1L/C3AR1/CCL18/VAV3/SLAMF8/C5AR1	26	Module4
GO:0042129	regulation of T cell proliferation	30/608	167/18866	1.57973e-14	1.55922e-12	1.15304e-12	CCL5/PTPRC/GPNMB/HAVCR2/CD80/CD209/LGALS3/HLA-DPB1/LGALS9/CD4/HLA-DMB/VSIG4/SASH3/CD86/IL18/CD28/PTPN6/LILRB1/TNFSF8/RAC2/SYK/LILRB2/AIF1/CORO1A/RIPK2/NCKAP1L/HLA-DPA1/TNFRSF21/PYCARD/TNFSF13B	30	Module4
GO:1903708	positive regulation of hemopoiesis	33/608	204/18866	1.78376e-14	1.72393e-12	1.27484e-12	SCIN/PTPRC/FOXC1/CD80/VNN1/CD74/INPP5D/LILRB4/TRIB1/HCLS1/IL4R/LGALS9/CD4/TYROBP/RUNX3/CD83/SASH3/RHOH/CCR1/BTK/CD86/IL7R/IL18/NLRP3/SYK/LILRB2/ATP6AP1/RIPK2/NCKAP1L/EVI2B/DUSP10/TREM2/MTURN	33	Module4
GO:0048002	antigen processing and presentation of peptide antigen	32/608	194/18866	2.54713e-14	2.41146e-12	1.78327e-12	FCER1G/SLC11A1/TAPBP/CD209/CD74/CTSD/PSME1/HLA-DPB1/LGMN/B2M/CTSL/AP2S1/VAMP8/PSMB10/CTSS/CYBA/DYNC1LI2/CYBB/HLA-DMB/PSMB9/NCF4/HLA-DOA/HLA-DRA/PSMB8/NCF2/FCGR2B/HLA-DPA1/NCF1/FCGR1B/HLA-DMA/TREM2/PYCARD	32	Module4
GO:0071346	cellular response to interferon-gamma	31/608	182/18866	2.62549e-14	2.43593e-12	1.80136e-12	CCL5/EDN1/HLA-DPB1/IFNGR2/B2M/PRKCD/ICAM1/SP100/SIRPA/DAPK1/LGALS9/NMI/IRF8/CCL4/MRC1/TLR2/PTPN2/WAS/CCL20/CASP1/PTAFR/AIF1/HCK/HLA-DRA/CCL18/HLA-DPA1/TRIM22/FCGR1B/MYO1C/PARP14/GBP5	31	Module4
GO:0071216	cellular response to biotic stimulus	36/608	246/18866	2.75929e-14	2.50987e-12	1.85604e-12	CCL5/BCL2L11/HAVCR2/CLEC7A/CD80/CX3CR1/CXCL2/ABCA1/NFKBIA/CD14/TRIB1/LYN/ICAM1/SIRPA/IRF8/MRC1/TLR2/KMO/BTK/CD86/LY86/CASP1/CD180/PTAFR/IL18/NLRP3/LILRB1/SYK/LILRB2/LILRA2/HCK/RIPK2/TLR1/FCGR2B/TREM2/PYCARD	36	Module4
GO:0002831	regulation of response to biotic stimulus	47/608	409/18866	3.75323e-14	3.34831e-12	2.47607e-12	CCL5/NLRC4/HAVCR2/FCER1G/CD209/GRN/PSME1/IFNGR2/TRIB1/PRKCD/LYN/PSMB10/HEXIM1/CYBA/LGALS9/APOE/ARRB2/HMGB3/NMI/PSMB9/MMP12/VSIG4/PTPN2/MNDA/LY86/CD180/VAV1/CR1/PTPN6/LILRB1/SYK/LILRA2/HCK/FGR/CADM1/PSMB8/RIPK2/SERPINB9/FCGR2B/DUSP10/SLAMF8/TREM2/CLEC4E/TLR8/PYCARD/PARP14/GBP5	47	Module4
GO:0045619	regulation of lymphocyte differentiation	30/608	181/18866	1.45424e-13	1.27287e-11	9.41286e-12	PTPRC/CD80/VNN1/CD74/INPP5D/LILRB4/IL4R/LGALS9/HMGB3/RUNX3/CD83/SASH3/PTPN2/RHOH/BTK/CD86/IL7R/CR1/IL18/HLA-DOA/CD28/PTPN6/NLRP3/SYK/LILRB2/RIPK2/NCKAP1L/DUSP10/PRDM1/SLAMF8	30	Module4
GO:0030593	neutrophil chemotaxis	23/608	103/18866	1.55376e-13	1.3348e-11	9.87079e-12	CCL5/FCER1G/ITGA9/ITGB2/CXADR/LGALS3/EDN1/CD74/CXCL2/MPP1/DPP4/CCL4/CCL20/VAV1/CCR7/PIK3CG/RAC2/SYK/NCKAP1L/C3AR1/CCL18/VAV3/C5AR1	23	Module4
GO:0002695	negative regulation of leukocyte activation	30/608	184/18866	2.27279e-13	1.91699e-11	1.41761e-11	PTPRC/GPNMB/HAVCR2/CD80/SAMSN1/LGALS3/CD74/INPP5D/GRN/LYN/IL4R/LGALS9/HMGB3/TYROBP/RUNX3/VSIG4/PTPN2/MNDA/BTK/CD86/CD84/PTPN6/LILRB1/LILRB2/FGR/CD300A/LST1/FCGR2B/TNFRSF21/PAG1	30	Module4
GO:0070665	positive regulation of leukocyte proliferation	27/608	150/18866	3.14499e-13	2.60528e-11	1.9266e-11	CCL5/PTPRC/HAVCR2/CD80/CD209/CD74/HLA-DPB1/LYN/CSF1R/LGALS9/CD4/HLA-DMB/SASH3/GPR183/CD86/IL18/CD28/SYK/LILRB2/AIF1/CORO1A/RIPK2/NCKAP1L/HLA-DPA1/VAV3/PYCARD/TNFSF13B	27	Module4
GO:0051250	negative regulation of lymphocyte activation	27/608	154/18866	6.07658e-13	4.94548e-11	3.65717e-11	GPNMB/HAVCR2/CD80/SAMSN1/LGALS3/CD74/INPP5D/LYN/IL4R/LGALS9/HMGB3/TYROBP/RUNX3/VSIG4/PTPN2/MNDA/BTK/CD86/PTPN6/LILRB1/LILRB2/FGR/CD300A/LST1/FCGR2B/TNFRSF21/PAG1	27	Module4
GO:0042102	positive regulation of T cell proliferation	22/608	101/18866	9.02852e-13	7.09887e-11	5.24959e-11	CCL5/PTPRC/HAVCR2/CD80/CD209/HLA-DPB1/LGALS9/CD4/HLA-DMB/SASH3/CD86/IL18/CD28/SYK/LILRB2/AIF1/CORO1A/RIPK2/NCKAP1L/HLA-DPA1/PYCARD/TNFSF13B	22	Module4
GO:0042116	macrophage activation	22/608	101/18866	9.02852e-13	7.09887e-11	5.24959e-11	PTPRC/HAVCR2/SLC11A1/ITGB2/CD74/GRN/CTSC/IL4R/CEBPA/TYROBP/GPR137B/VSIG4/TLR2/ITGAM/SYK/AIF1/TLR1/FCGR2B/C1QA/TREM2/C5AR1/TLR8	22	Module4
GO:0071219	cellular response to molecule of bacterial origin	32/608	222/18866	1.17092e-12	9.05314e-11	6.69477e-11	CCL5/HAVCR2/CD80/CX3CR1/CXCL2/ABCA1/NFKBIA/CD14/TRIB1/LYN/ICAM1/SIRPA/IRF8/MRC1/TLR2/KMO/CD86/LY86/CASP1/CD180/PTAFR/IL18/NLRP3/LILRB1/LILRB2/LILRA2/HCK/RIPK2/TLR1/FCGR2B/TREM2/PYCARD	32	Module4
GO:0002699	positive regulation of immune effector process	32/608	223/18866	1.32641e-12	1.00873e-10	7.4595e-11	PTPRC/CD80/FCER1G/ITGB2/CD74/B2M/VAMP8/LYN/IL4R/LGALS9/HLA-DMB/TYROBP/SASH3/BTK/CD86/ITGAM/ADORA2B/CD84/VAV1/PTAFR/IL18/CD28/NLRP3/P2RX7/LILRB1/RAC2/SYK/FGR/CADM1/RIPK2/CD300A/TNFSF13	32	Module4
GO:0050671	positive regulation of lymphocyte proliferation	25/608	136/18866	1.4641e-12	1.09547e-10	8.101e-11	CCL5/PTPRC/HAVCR2/CD80/CD209/CD74/HLA-DPB1/LGALS9/CD4/HLA-DMB/SASH3/GPR183/CD86/IL18/CD28/SYK/LILRB2/AIF1/CORO1A/RIPK2/NCKAP1L/HLA-DPA1/VAV3/PYCARD/TNFSF13B	25	Module4
GO:0032946	positive regulation of mononuclear cell proliferation	25/608	137/18866	1.73762e-12	1.2795e-10	9.46185e-11	CCL5/PTPRC/HAVCR2/CD80/CD209/CD74/HLA-DPB1/LGALS9/CD4/HLA-DMB/SASH3/GPR183/CD86/IL18/CD28/SYK/LILRB2/AIF1/CORO1A/RIPK2/NCKAP1L/HLA-DPA1/VAV3/PYCARD/TNFSF13B	25	Module4
GO:0002886	regulation of myeloid leukocyte mediated immunity	17/608	58/18866	2.02232e-12	1.46587e-10	1.08401e-10	FCER1G/ITGB2/VAMP8/LYN/IL4R/LGALS9/TYROBP/BTK/ITGAM/ADORA2B/CD84/PTAFR/RAC2/SYK/FGR/CD300A/FCGR2B	17	Module4
GO:0045621	positive regulation of lymphocyte differentiation	22/608	105/18866	2.08167e-12	1.48567e-10	1.09865e-10	PTPRC/CD80/VNN1/CD74/INPP5D/LILRB4/IL4R/LGALS9/RUNX3/CD83/SASH3/RHOH/BTK/CD86/IL7R/IL18/NLRP3/SYK/LILRB2/RIPK2/NCKAP1L/DUSP10	22	Module4
GO:0071621	granulocyte chemotaxis	24/608	127/18866	2.20514e-12	1.54995e-10	1.14618e-10	CCL5/FCER1G/ITGA9/ITGB2/CXADR/LGALS3/EDN1/CD74/CXCL2/MPP1/CSF1R/DPP4/CCL4/CCL20/VAV1/CCR7/PIK3CG/RAC2/SYK/NCKAP1L/C3AR1/CCL18/VAV3/C5AR1	24	Module4
GO:0050727	regulation of inflammatory response	45/608	425/18866	2.42175e-12	1.67679e-10	1.23998e-10	CCL5/PTPRC/CLEC7A/PIK3AP1/ADCY7/FCER1G/GRN/GPX1/PLD3/CTSC/NFKBIA/PRKCD/VAMP8/LYN/ABCC1/SIRPA/APOE/MMP9/CEBPA/MGST2/GPSM3/ALOX5/ACP5/PTGER4/TLR2/PTPN2/BTK/ADORA2B/CASP1/PLA2G7/IL18/CCR7/PIK3CG/CD28/TNFRSF11A/NLRP3/HCK/MAPK13/FCGR2B/DUSP10/SLAMF8/TREM2/PYCARD/METRNL/GBP5	45	Module4
GO:0002478	antigen processing and presentation of exogenous peptide antigen	28/608	177/18866	3.08965e-12	2.10778e-10	1.55869e-10	FCER1G/TAPBP/CD74/CTSD/PSME1/HLA-DPB1/LGMN/B2M/CTSL/AP2S1/VAMP8/PSMB10/CTSS/CYBA/DYNC1LI2/CYBB/HLA-DMB/PSMB9/NCF4/HLA-DOA/HLA-DRA/PSMB8/NCF2/FCGR2B/HLA-DPA1/NCF1/FCGR1B/HLA-DMA	28	Module4
GO:0045730	respiratory burst	14/608	37/18866	3.46509e-12	2.32965e-10	1.72277e-10	CLEC7A/SLC11A1/GRN/CYBA/CYBB/CD52/NCF4/PIK3CG/RAC2/HCK/NCF2/NCF1/DUSP10/SLAMF8	14	Module4
GO:0002687	positive regulation of leukocyte migration	25/608	142/18866	3.99558e-12	2.64793e-10	1.95813e-10	CCL5/LGALS3/EDN1/CD74/CX3CR1/LGMN/ICAM1/CSF1R/LGALS9/CCL4/GPSM3/CCR1/CCL20/ITGA4/PLA2G7/PTAFR/CCR7/RAC2/AIF1/NCKAP1L/C3AR1/TREM2/C5AR1/PYCARD/DOCK8	25	Module4
GO:0002286	T cell activation involved in immune response	22/608	109/18866	4.6115e-12	3.01306e-10	2.22815e-10	ITGAL/HAVCR2/CD80/APBB1IP/FCER1G/SLC11A1/LGALS3/CD74/ICAM1/IL4R/LGALS9/HLA-DMB/PTGER4/GPR183/CD86/IL18/NLRP3/LILRB1/LCP1/RIPK2/FCGR2B/CLEC4E	22	Module4
GO:0002819	regulation of adaptive immune response	27/608	168/18866	5.16536e-12	3.32807e-10	2.4611e-10	PTPRC/HAVCR2/CD80/ADCY7/FCER1G/SLC11A1/SAMSN1/B2M/IL4R/CD4/SASH3/WAS/BTK/IL7R/CR1/IL18/CD28/PTPN6/NLRP3/P2RX7/LILRB1/RIPK2/TNFSF13/FCGR2B/DUSP10/PYCARD/TNFSF13B	27	Module4
GO:0070371	ERK1 and ERK2 cascade	38/608	325/18866	6.66526e-12	4.23564e-10	3.13224e-10	CCL5/PTPRC/GPNMB/HAVCR2/PDGFRA/NRP1/CD74/CTSH/CSK/LYN/ICAM1/SIRPA/CSF1R/LGALS9/APOE/ARRB2/CD4/CCL4/PTGER4/PTPN2/CCR1/GPR183/CCL20/MARCO/CCR7/PTPN6/TNFRSF11A/SYK/ATP6AP1/CHI3L1/RIPK2/CCL18/RRAS/DUSP10/TREM2/C5AR1/PYCARD/MTURN	38	Module4
GO:0050777	negative regulation of immune response	26/608	159/18866	8.55681e-12	5.36419e-10	3.9668e-10	PTPRC/HAVCR2/SAMSN1/LGALS3/INPP5D/GRN/GPX1/LYN/IL4R/LGALS9/ARRB2/NMI/MMP12/VSIG4/PTPN2/IL7R/CD84/CR1/PTPN6/LILRB1/SERPINB9/CD300A/FCGR2B/DUSP10/SLAMF8/PARP14	26	Module4
GO:0019884	antigen processing and presentation of exogenous antigen	28/608	185/18866	9.27225e-12	5.73519e-10	4.24116e-10	FCER1G/TAPBP/CD74/CTSD/PSME1/HLA-DPB1/LGMN/B2M/CTSL/AP2S1/VAMP8/PSMB10/CTSS/CYBA/DYNC1LI2/CYBB/HLA-DMB/PSMB9/NCF4/HLA-DOA/HLA-DRA/PSMB8/NCF2/FCGR2B/HLA-DPA1/NCF1/FCGR1B/HLA-DMA	28	Module4
GO:0043300	regulation of leukocyte degranulation	15/608	47/18866	1.02478e-11	6.17748e-10	4.56823e-10	FCER1G/ITGB2/VAMP8/LYN/IL4R/LGALS9/ITGAM/ADORA2B/CD84/PTAFR/RAC2/SYK/FGR/CD300A/FCGR2B	15	Module4
GO:0045582	positive regulation of T cell differentiation	20/608	92/18866	1.02536e-11	6.17748e-10	4.56823e-10	PTPRC/CD80/VNN1/CD74/LILRB4/IL4R/LGALS9/RUNX3/CD83/SASH3/RHOH/CD86/IL7R/IL18/NLRP3/SYK/LILRB2/RIPK2/NCKAP1L/DUSP10	20	Module4
GO:0002285	lymphocyte activation involved in immune response	28/608	187/18866	1.20848e-11	7.18737e-10	5.31504e-10	PTPRC/ITGAL/HAVCR2/CD80/APBB1IP/FCER1G/SLC11A1/LGALS3/CD74/ICAM1/IL4R/LGALS9/HLA-DMB/MFNG/PTGER4/GPR183/CD86/CD180/IL18/CD28/NLRP3/LILRB1/LCP1/CORO1A/RIPK2/TNFSF13/FCGR2B/CLEC4E	28	Module4
GO:0045580	regulation of T cell differentiation	25/608	150/18866	1.40262e-11	8.23641e-10	6.0908e-10	PTPRC/CD80/VNN1/CD74/LILRB4/IL4R/LGALS9/RUNX3/CD83/SASH3/PTPN2/RHOH/CD86/IL7R/CR1/IL18/HLA-DOA/CD28/NLRP3/SYK/LILRB2/RIPK2/NCKAP1L/DUSP10/PRDM1	25	Module4
GO:0070372	regulation of ERK1 and ERK2 cascade	36/608	306/18866	2.02224e-11	1.15899e-09	8.57067e-10	CCL5/PTPRC/GPNMB/HAVCR2/PDGFRA/NRP1/CD74/CSK/LYN/ICAM1/SIRPA/CSF1R/LGALS9/APOE/ARRB2/CD4/CCL4/PTPN2/CCR1/GPR183/CCL20/MARCO/CCR7/PTPN6/TNFRSF11A/SYK/ATP6AP1/CHI3L1/RIPK2/CCL18/RRAS/DUSP10/TREM2/C5AR1/PYCARD/MTURN	36	Module4
GO:0002448	mast cell mediated immunity	15/608	49/18866	2.02367e-11	1.15899e-09	8.57067e-10	FCER1G/VAMP8/LYN/IL4R/LGALS9/BTK/ADORA2B/CD84/PIK3CG/RAC2/SYK/FGR/SERPINB9/CD300A/LAT2	15	Module4
GO:0071222	cellular response to lipopolysaccharide	29/608	208/18866	3.11634e-11	1.76301e-09	1.30374e-09	CCL5/HAVCR2/CD80/CX3CR1/CXCL2/ABCA1/NFKBIA/CD14/TRIB1/LYN/ICAM1/SIRPA/IRF8/MRC1/TLR2/KMO/CD86/LY86/CASP1/CD180/PTAFR/IL18/NLRP3/LILRB1/LILRB2/LILRA2/HCK/RIPK2/PYCARD	29	Module4
GO:0002573	myeloid leukocyte differentiation	29/608	210/18866	3.95196e-11	2.20881e-09	1.63341e-09	OSCAR/FCER1G/CD74/INPP5D/LILRB4/TRIB1/LYN/HCLS1/CSF1R/CD4/MMP9/CEBPA/TYROBP/GPR137B/TLR2/PTPN2/CCR1/GPR183/CCR7/TNFRSF11A/LILRB1/ATP6AP1/LILRB3/EVI2B/SNX10/MAFB/TREM2/C1QC/NRROS	29	Module4
GO:0032635	interleukin-6 production	26/608	170/18866	4.05071e-11	2.23705e-09	1.65429e-09	HAVCR2/CLEC7A/FCER1G/CD74/CSK/SIRPA/CYBA/LGALS9/ARRB2/TYROBP/TLR2/ADORA2B/IL18/PTPN6/P2RX7/SYK/LILRB2/AIF1/LILRA2/RIPK2/NCKAP1L/MAPK13/TLR1/TREM2/TLR8/PYCARD	26	Module4
GO:0002291	T cell activation via T cell receptor contact with antigen bound to MHC molecule on antigen presenting cell	8/608	10/18866	4.72769e-11	2.58021e-09	1.90805e-09	ITGAL/HAVCR2/APBB1IP/LGALS3/ICAM1/LGALS9/HLA-DMB/LILRB1	8	Module4
GO:0050672	negative regulation of lymphocyte proliferation	18/608	79/18866	4.83549e-11	2.59154e-09	1.91643e-09	GPNMB/HAVCR2/CD80/INPP5D/LYN/LGALS9/TYROBP/VSIG4/MNDA/BTK/CD86/PTPN6/LILRB1/LILRB2/CD300A/LST1/FCGR2B/TNFRSF21	18	Module4
GO:0046631	alpha-beta T cell activation	24/608	146/18866	4.86018e-11	2.59154e-09	1.91643e-09	PTPRC/DOCK2/CD80/PSAP/CTSL/IL4R/LGALS9/RUNX3/CD83/PTGER4/SASH3/GPR183/CD86/IL18/CD28/NLRP3/LILRB1/TNFSF8/SYK/RIPK2/NCKAP1L/CD300A/ITK/PRDM1	24	Module4
GO:0032675	regulation of interleukin-6 production	25/608	159/18866	5.20759e-11	2.74523e-09	2.03009e-09	HAVCR2/CLEC7A/FCER1G/CD74/CSK/SIRPA/CYBA/LGALS9/ARRB2/TYROBP/TLR2/ADORA2B/PTPN6/P2RX7/SYK/LILRB2/AIF1/LILRA2/RIPK2/NCKAP1L/MAPK13/TLR1/TREM2/TLR8/PYCARD	25	Module4
GO:0045576	mast cell activation	16/608	61/18866	5.88007e-11	3.0649e-09	2.26649e-09	FCER1G/VAMP8/LYN/IL4R/LGALS9/RHOH/LCP2/BTK/ADORA2B/CD84/PIK3CG/RAC2/SYK/FGR/CD300A/LAT2	16	Module4
GO:0032945	negative regulation of mononuclear cell proliferation	18/608	80/18866	6.0548e-11	3.12091e-09	2.3079e-09	GPNMB/HAVCR2/CD80/INPP5D/LYN/LGALS9/TYROBP/VSIG4/MNDA/BTK/CD86/PTPN6/LILRB1/LILRB2/CD300A/LST1/FCGR2B/TNFRSF21	18	Module4
GO:0050663	cytokine secretion	17/608	72/18866	9.12243e-11	4.65044e-09	3.43898e-09	SRGN/CD14/LYN/PTGER4/TLR2/LCP2/NLRP3/P2RX7/SYK/FGR/CADM1/TLR5/TLR1/FCGR2B/CLEC4E/CLEC5A/TLR8	17	Module4
GO:0050851	antigen receptor-mediated signaling pathway	36/608	325/18866	1.13515e-10	5.72385e-09	4.23277e-09	PTPRC/KLHL6/LGALS3/INPP5D/LILRB4/PSME1/HLA-DPB1/CSK/LYN/PSMB10/CD4/PSMB9/KCNN4/PTPN2/MNDA/LCP2/WAS/BTK/CCR7/CD28/PTPN6/SYK/THEMIS2/HLA-DRA/PSMB8/RIPK2/NCKAP1L/CD300A/FCGR2B/ITK/LAT2/HLA-DPA1/TNFRSF21/LPXN/VAV3/PAG1	36	Module4
GO:0002224	toll-like receptor signaling pathway	24/608	152/18866	1.15894e-10	5.781e-09	4.27504e-09	HAVCR2/PIK3AP1/ITGB2/CTSB/LGMN/NFKBIA/CD14/CTSL/CTSK/LYN/MAPKAPK3/CTSS/CYBA/ARRB2/TLR2/BTK/ITGAM/LILRA2/RIPK2/CD300A/TLR5/TLR1/TLR8/COLEC12	24	Module4
GO:0043303	mast cell degranulation	14/608	47/18866	1.43931e-10	7.10316e-09	5.25277e-09	FCER1G/VAMP8/LYN/IL4R/LGALS9/BTK/ADORA2B/CD84/PIK3CG/RAC2/SYK/FGR/CD300A/LAT2	14	Module4
GO:0032611	interleukin-1 beta production	20/608	106/18866	1.56707e-10	7.65227e-09	5.65883e-09	NLRC4/CLEC7A/CX3CR1/ABCA1/SIRPA/LGALS9/ARRB2/TYROBP/ACP5/MNDA/CASP1/CCR7/NLRP3/P2RX7/LILRA2/RIPK2/TREM2/TLR8/PYCARD/GBP5	20	Module4
GO:0030099	myeloid cell differentiation	42/608	431/18866	1.86933e-10	9.03316e-09	6.68e-09	SCIN/OSCAR/FCER1G/LGALS3/MEIS1/CD74/INPP5D/LILRB4/NFKBIA/B2M/TRIB1/LYN/HCLS1/CSF1R/CD4/HMGB3/MMP9/CEBPA/IRF8/TYROBP/GPR137B/TLR2/PTPN2/CCR1/GPR183/CCR7/PTPN6/TNFRSF11A/LILRB1/ATP6AP1/NCKAP1L/LILRB3/EVI2B/SNX10/MAFB/TREM2/CLEC5A/MOV10/C1QC/MTURN/ZNF385A/NRROS	42	Module4
GO:0002279	mast cell activation involved in immune response	14/608	48/18866	1.9724e-10	9.43295e-09	6.97564e-09	FCER1G/VAMP8/LYN/IL4R/LGALS9/BTK/ADORA2B/CD84/PIK3CG/RAC2/SYK/FGR/CD300A/LAT2	14	Module4
GO:0070664	negative regulation of leukocyte proliferation	18/608	86/18866	2.17215e-10	1.02822e-08	7.60369e-09	GPNMB/HAVCR2/CD80/INPP5D/LYN/LGALS9/TYROBP/VSIG4/MNDA/BTK/CD86/PTPN6/LILRB1/LILRB2/CD300A/LST1/FCGR2B/TNFRSF21	18	Module4
GO:0001909	leukocyte mediated cytotoxicity	20/608	108/18866	2.2272e-10	1.04363e-08	7.71764e-09	PTPRC/HAVCR2/CTSC/B2M/CTSH/ICAM1/LGALS9/ARRB2/TYROBP/ITGAM/IL7R/VAV1/IL18/PTPN6/P2RX7/LILRB1/CADM1/CORO1A/SERPINB9/FCGR2B	20	Module4
GO:0002449	lymphocyte mediated immunity	38/608	366/18866	2.29448e-10	1.04468e-08	7.72539e-09	PTPRC/HAVCR2/C2/FCER1G/SLC11A1/CFI/CD74/INPP5D/CTSC/B2M/CTSH/PRKCD/ICAM1/C1QB/IL4R/LGALS9/ARRB2/SASH3/WAS/BTK/IL7R/VAV1/CR1/IL18/CD28/PTPN6/NLRP3/P2RX7/LILRB1/CADM1/CORO1A/SERPINB9/TNFSF13/FCGR2B/C1R/C1QA/TLR8/C1QC	38	Module4
GO:0042100	B cell proliferation	19/608	97/18866	2.29699e-10	1.04468e-08	7.72539e-09	PTPRC/CD74/INPP5D/PRKCD/CTPS1/LYN/TYROBP/SASH3/MNDA/GPR183/BTK/IL7R/CD180/NCKAP1L/CD300A/FCGR2B/TNFRSF21/VAV3/TNFSF13B	19	Module4
GO:0050764	regulation of phagocytosis	19/608	97/18866	2.29699e-10	1.04468e-08	7.72539e-09	PTPRC/DOCK2/CLEC7A/C2/FCER1G/SLC11A1/CSK/SIRPA/CYBA/IL2RG/TLR2/SYK/HCK/FGR/NCKAP1L/CD300A/FCGR2B/TREM2/PYCARD	19	Module4
GO:0032612	interleukin-1 production	21/608	121/18866	2.79261e-10	1.25776e-08	9.3011e-09	NLRC4/HAVCR2/CLEC7A/CX3CR1/ABCA1/SIRPA/LGALS9/ARRB2/TYROBP/ACP5/MNDA/CASP1/CCR7/NLRP3/P2RX7/LILRA2/RIPK2/TREM2/TLR8/PYCARD/GBP5	21	Module4
GO:0002460	adaptive immune response based on somatic recombination of immune receptors built from immunoglobulin superfamily domains	38/608	370/18866	3.14269e-10	1.40182e-08	1.03664e-08	PTPRC/HAVCR2/CD80/C2/FCER1G/SLC11A1/KLHL6/CFI/CD74/INPP5D/CTSC/B2M/CTSH/PRKCD/ICAM1/C1QB/IL4R/CD4/SASH3/WAS/BTK/IL7R/CR1/IL18/CD28/PTPN6/NLRP3/P2RX7/LILRB1/RIPK2/TNFSF13/FCGR2B/C1R/C1QA/IL18BP/TLR8/TNFSF13B/C1QC	38	Module4
GO:0032755	positive regulation of interleukin-6 production	18/608	88/18866	3.24247e-10	1.43256e-08	1.05937e-08	CLEC7A/FCER1G/CD74/CYBA/LGALS9/TYROBP/TLR2/ADORA2B/P2RX7/SYK/LILRB2/AIF1/LILRA2/RIPK2/MAPK13/TLR1/TLR8/PYCARD	18	Module4
GO:0032970	regulation of actin filament-based process	40/608	405/18866	3.44082e-10	1.49484e-08	1.10543e-08	SCIN/PDGFRA/ARHGDIB/NRP1/EDN1/ARHGEF10L/FSCN1/CAPG/ARPC1B/PRKCD/ICAM1/ROCK2/ANK2/HCLS1/CSF1R/RHOG/ATP1A2/PLEK/IQGAP2/ACTN2/DSC2/PTGER4/RHOH/PFN2/WAS/CCR7/EFNA5/RAC2/HCK/ARPC3/CORO1A/NCKAP1L/GPR65/MYO1C/TMSB10/PYCARD/KCNE3/ABRACL/ARHGAP18/SHANK3	40	Module4
GO:0070374	positive regulation of ERK1 and ERK2 cascade	28/608	215/18866	3.4479e-10	1.49484e-08	1.10543e-08	CCL5/PTPRC/GPNMB/HAVCR2/PDGFRA/NRP1/CD74/ICAM1/CSF1R/LGALS9/APOE/ARRB2/CD4/CCL4/CCR1/GPR183/CCL20/MARCO/CCR7/TNFRSF11A/ATP6AP1/CHI3L1/RIPK2/CCL18/TREM2/C5AR1/PYCARD/MTURN	28	Module4
GO:0050707	regulation of cytokine secretion	15/608	59/18866	3.80199e-10	1.6331e-08	1.20767e-08	SRGN/CD14/LYN/PTGER4/TLR2/P2RX7/SYK/FGR/CADM1/TLR5/TLR1/FCGR2B/CLEC4E/CLEC5A/TLR8	15	Module4
GO:0042554	superoxide anion generation	12/608	36/18866	6.9514e-10	2.94508e-08	2.17787e-08	CLEC7A/ITGB2/EDN1/PRKCD/CYBA/CYBB/TYROBP/ACP5/ITGAM/SYK/NCF2/NCF1	12	Module4
GO:0031341	regulation of cell killing	18/608	92/18866	6.98336e-10	2.94508e-08	2.17787e-08	PTPRC/BCL2L11/HAVCR2/CLEC7A/B2M/ICAM1/LGALS9/ARRB2/TYROBP/ITGAM/IL7R/VAV1/P2RX7/LILRB1/SYK/CADM1/SERPINB9/FCGR2B	18	Module4
GO:0002822	regulation of adaptive immune response based on somatic recombination of immune receptors built from immunoglobulin superfamily domains	23/608	153/18866	7.70737e-10	3.22113e-08	2.38201e-08	PTPRC/HAVCR2/CD80/FCER1G/SLC11A1/B2M/IL4R/CD4/SASH3/WAS/BTK/IL7R/CR1/IL18/CD28/PTPN6/NLRP3/P2RX7/LILRB1/RIPK2/TNFSF13/FCGR2B/TNFSF13B	23	Module4
GO:0030888	regulation of B cell proliferation	15/608	62/18866	8.10877e-10	3.35862e-08	2.48369e-08	PTPRC/CD74/INPP5D/LYN/TYROBP/SASH3/MNDA/GPR183/BTK/NCKAP1L/CD300A/FCGR2B/TNFRSF21/VAV3/TNFSF13B	15	Module4
GO:0007162	negative regulation of cell adhesion	33/608	301/18866	8.95225e-10	3.67517e-08	2.71778e-08	PTPRC/GPNMB/HAVCR2/CD80/ARHGDIB/LGALS3/PLXND1/CD74/TGFBI/PRKCD/IL4R/LGALS9/RUNX3/MMP12/VSIG4/PTPN2/CD86/ADAMDEC1/PLXNC1/PTPN6/LILRB1/EFNA5/LILRB2/CD300A/FCGR2B/SERPINE2/IL1RN/TNFRSF21/ADTRP/LPXN/FXYD5/RCC2/PAG1	33	Module4
GO:0032613	interleukin-10 production	15/608	63/18866	1.03301e-09	4.20361e-08	3.10856e-08	CLEC7A/FCER1G/PRKCD/LGALS9/TYROBP/CD83/SASH3/TLR2/CD28/LILRB1/SYK/FCGR2B/TNFRSF21/TREM2/PYCARD	15	Module4
GO:0046632	alpha-beta T cell differentiation	19/608	106/18866	1.12215e-09	4.52665e-08	3.34745e-08	CD80/PSAP/CTSL/IL4R/LGALS9/RUNX3/CD83/PTGER4/SASH3/GPR183/CD86/IL18/NLRP3/TNFSF8/SYK/RIPK2/NCKAP1L/ITK/PRDM1	19	Module4
GO:0050729	positive regulation of inflammatory response	23/608	158/18866	1.47173e-09	5.88564e-08	4.35241e-08	CLEC7A/FCER1G/GRN/CTSC/NFKBIA/VAMP8/ABCC1/CEBPA/MGST2/GPSM3/PTGER4/TLR2/BTK/ADORA2B/PLA2G7/IL18/CCR7/PIK3CG/CD28/TNFRSF11A/MAPK13/TREM2/GBP5	23	Module4
GO:0001906	cell killing	24/608	172/18866	1.55634e-09	6.17081e-08	4.5633e-08	PTPRC/BCL2L11/HAVCR2/CLEC7A/LYZ/CTSC/B2M/CTSH/ICAM1/LGALS9/ARRB2/TYROBP/ITGAM/IL7R/VAV1/IL18/PTPN6/P2RX7/LILRB1/SYK/CADM1/CORO1A/SERPINB9/FCGR2B	24	Module4
GO:0032651	regulation of interleukin-1 beta production	18/608	97/18866	1.71875e-09	6.757e-08	4.99678e-08	NLRC4/CLEC7A/CX3CR1/SIRPA/LGALS9/ARRB2/TYROBP/ACP5/MNDA/CASP1/CCR7/NLRP3/P2RX7/LILRA2/RIPK2/TREM2/TLR8/PYCARD	18	Module4
GO:0018212	peptidyl-tyrosine modification	37/608	377/18866	1.91091e-09	7.44934e-08	5.50876e-08	CCL5/PTPRC/CD80/CNTN1/PDGFRA/ITGB2/SAMSN1/NRP1/CD74/CSK/PRKCD/LYN/ICAM1/HCLS1/CSF1R/GPRC5A/ARRB2/CD4/SLA/TPST2/EPHB6/PTPN2/BTK/IL18/PTPN6/EFNA5/SYK/FGFR1/HCK/FGR/RIPK2/CD300A/ITK/RAP2B/NCF1/TREM2/PARP14	37	Module4
GO:0046718	viral entry into host cell	21/608	134/18866	1.94445e-09	7.51693e-08	5.55875e-08	CD80/CXADR/CD209/CD74/CTSB/CTSL/VAMP8/ICAM1/ANPEP/TRIM14/LGALS9/CD4/DPP4/MRC1/CD86/CR1/CXCR4/SELPLG/TRIM22/SIGLEC1/CLEC5A	21	Module4
GO:0044409	entry into host	22/608	147/18866	1.96443e-09	7.53139e-08	5.56944e-08	CD80/CXADR/CD209/CD74/CTSB/CTSL/VAMP8/ICAM1/ANPEP/TRIM14/LGALS9/CD4/DPP4/MRC1/CD86/CR1/CXCR4/SELPLG/TRIM22/SIGLEC1/CLEC5A/FUCA2	22	Module4
GO:0043304	regulation of mast cell degranulation	11/608	32/18866	2.4815e-09	9.4358e-08	6.97775e-08	FCER1G/VAMP8/LYN/IL4R/LGALS9/ADORA2B/CD84/RAC2/SYK/FGR/CD300A	11	Module4
GO:0032652	regulation of interleukin-1 production	19/608	111/18866	2.51669e-09	9.49181e-08	7.01916e-08	NLRC4/HAVCR2/CLEC7A/CX3CR1/SIRPA/LGALS9/ARRB2/TYROBP/ACP5/MNDA/CASP1/CCR7/NLRP3/P2RX7/LILRA2/RIPK2/TREM2/TLR8/PYCARD	19	Module4
GO:0002688	regulation of leukocyte chemotaxis	20/608	124/18866	2.81852e-09	1.05444e-07	7.79758e-08	CCL5/EDN1/CD74/LGMN/LYN/MPP1/CSF1R/LGALS9/DPP4/CCL4/GPSM3/CCR1/PLA2G7/CCR7/RAC2/AIF1/NCKAP1L/C3AR1/SLAMF8/C5AR1	20	Module4
GO:0002833	positive regulation of response to biotic stimulus	29/608	251/18866	2.84887e-09	1.05727e-07	7.81849e-08	CCL5/NLRC4/HAVCR2/FCER1G/CD209/GRN/PSME1/PRKCD/LYN/PSMB10/HEXIM1/CYBA/HMGB3/PSMB9/MMP12/MNDA/LY86/CD180/VAV1/SYK/LILRA2/HCK/CADM1/PSMB8/RIPK2/CLEC4E/TLR8/PYCARD/GBP5	29	Module4
GO:0050852	T cell receptor signaling pathway	26/608	206/18866	2.91156e-09	1.07196e-07	7.92712e-08	PTPRC/LGALS3/INPP5D/LILRB4/PSME1/HLA-DPB1/CSK/PSMB10/CD4/PSMB9/KCNN4/PTPN2/LCP2/WAS/CCR7/CD28/PTPN6/THEMIS2/HLA-DRA/PSMB8/RIPK2/CD300A/ITK/HLA-DPA1/TNFRSF21/PAG1	26	Module4
GO:0002705	positive regulation of leukocyte mediated immunity	21/608	138/18866	3.36305e-09	1.22844e-07	9.08427e-08	PTPRC/FCER1G/ITGB2/B2M/VAMP8/IL4R/TYROBP/SASH3/BTK/ITGAM/ADORA2B/VAV1/PTAFR/IL18/CD28/NLRP3/P2RX7/SYK/FGR/CADM1/TNFSF13	21	Module4
GO:0033006	regulation of mast cell activation involved in immune response	11/608	33/18866	3.6146e-09	1.31001e-07	9.68748e-08	FCER1G/VAMP8/LYN/IL4R/LGALS9/ADORA2B/CD84/RAC2/SYK/FGR/CD300A	11	Module4
GO:0002577	regulation of antigen processing and presentation	9/608	20/18866	4.3234e-09	1.55475e-07	1.14973e-07	SLC11A1/CD74/WAS/HLA-DOA/CCR7/LILRB2/FCGR2B/TREM2/PYCARD	9	Module4
GO:0072593	reactive oxygen species metabolic process	31/608	288/18866	4.54131e-09	1.62055e-07	1.19839e-07	CLEC7A/ITGB2/EDN1/CX3CR1/GPX1/PRDX4/PRKCD/ICAM1/ROCK2/SIRPA/HK2/CYBA/CYBB/TYROBP/ALOX5/ACP5/TLR2/NCF4/ITGAM/VAV1/P2RX7/RAC2/SYK/AIF1/CRYAB/NCF2/NCF1/GLA/CYB5R4/PID1/NRROS	31	Module4
GO:0002706	regulation of lymphocyte mediated immunity	22/608	154/18866	4.79141e-09	1.69674e-07	1.25474e-07	PTPRC/HAVCR2/FCER1G/B2M/LGALS9/ARRB2/SASH3/WAS/BTK/IL7R/VAV1/CR1/IL18/CD28/PTPN6/NLRP3/P2RX7/LILRB1/CADM1/SERPINB9/TNFSF13/FCGR2B	22	Module4
GO:0032653	regulation of interleukin-10 production	14/608	60/18866	4.96469e-09	1.74479e-07	1.29026e-07	CLEC7A/FCER1G/LGALS9/TYROBP/CD83/SASH3/TLR2/CD28/LILRB1/SYK/FCGR2B/TNFRSF21/TREM2/PYCARD	14	Module4
GO:1902622	regulation of neutrophil migration	12/608	42/18866	5.14497e-09	1.79455e-07	1.32706e-07	EDN1/CD74/MPP1/RHOG/DPP4/RHOH/CCR7/RAC2/NCKAP1L/C3AR1/SLAMF8/C5AR1	12	Module4
GO:0002888	positive regulation of myeloid leukocyte mediated immunity	11/608	34/18866	5.18881e-09	1.79634e-07	1.32838e-07	FCER1G/ITGB2/VAMP8/IL4R/TYROBP/BTK/ITGAM/ADORA2B/PTAFR/SYK/FGR	11	Module4
GO:0018108	peptidyl-tyrosine phosphorylation	36/608	374/18866	5.32312e-09	1.82918e-07	1.35267e-07	CCL5/PTPRC/CD80/CNTN1/PDGFRA/ITGB2/SAMSN1/NRP1/CD74/CSK/PRKCD/LYN/ICAM1/HCLS1/CSF1R/GPRC5A/ARRB2/CD4/SLA/EPHB6/PTPN2/BTK/IL18/PTPN6/EFNA5/SYK/FGFR1/HCK/FGR/RIPK2/CD300A/ITK/RAP2B/NCF1/TREM2/PARP14	36	Module4
GO:0002532	production of molecular mediator involved in inflammatory response	17/608	93/18866	6.18665e-09	2.11028e-07	1.56055e-07	CLEC7A/ADCY7/FCER1G/GRN/PLD3/VAMP8/LYN/SIRPA/IL4R/GPSM3/ALOX5/BTK/SYK/DUSP10/SLAMF8/PYCARD/GBP5	17	Module4
GO:0050920	regulation of chemotaxis	27/608	229/18866	6.47653e-09	2.19304e-07	1.62174e-07	CCL5/PDGFRA/NRP1/EDN1/CD74/LGMN/LYN/MPP1/CSF1R/LGALS9/DPP4/CCL4/GPSM3/PTPN2/CCR1/GPR183/PLA2G7/CCR7/RAC2/FGFR1/AIF1/CXCR4/NCKAP1L/C3AR1/SLAMF8/TREM2/C5AR1	27	Module4
GO:0032956	regulation of actin cytoskeleton organization	35/608	360/18866	6.73361e-09	2.26357e-07	1.6739e-07	SCIN/PDGFRA/ARHGDIB/NRP1/EDN1/ARHGEF10L/FSCN1/CAPG/ARPC1B/PRKCD/ICAM1/ROCK2/HCLS1/CSF1R/RHOG/PLEK/IQGAP2/ACTN2/PTGER4/RHOH/PFN2/WAS/CCR7/EFNA5/RAC2/HCK/ARPC3/CORO1A/NCKAP1L/GPR65/MYO1C/TMSB10/PYCARD/ARHGAP18/SHANK3	35	Module4
GO:0010959	regulation of metal ion transport	37/608	396/18866	7.26659e-09	2.42516e-07	1.7934e-07	CCL5/CEMIP/CNTN1/CACNB2/LGALS3/TMBIM6/B2M/LYN/ICAM1/ANK2/CYBA/ATP1A2/ARRB2/KCNAB2/CD4/ACTN2/CCL4/SLC31A2/MYO5A/CCR1/CD84/PIK3CG/PTPN6/P2RX7/LILRB1/LILRB2/LILRA2/KCNAB1/CORO1A/CXCR4/SERPINE2/GPD1L/FXYD5/NETO2/TREM2/KCNE3/SESTD1	37	Module4
GO:0045824	negative regulation of innate immune response	14/608	62/18866	7.84272e-09	2.59874e-07	1.92176e-07	HAVCR2/GRN/LGALS9/ARRB2/NMI/MMP12/VSIG4/PTPN2/CR1/LILRB1/SERPINB9/DUSP10/SLAMF8/PARP14	14	Module4
GO:0002221	pattern recognition receptor signaling pathway	25/608	201/18866	7.9401e-09	2.61235e-07	1.93182e-07	HAVCR2/PIK3AP1/ITGB2/CTSB/LGMN/NFKBIA/CD14/CTSL/CTSK/LYN/MAPKAPK3/CTSS/CYBA/ARRB2/TLR2/BTK/ITGAM/LILRA2/RIPK2/CD300A/TLR5/TLR1/CLEC4E/TLR8/COLEC12	25	Module4
GO:0046635	positive regulation of alpha-beta T cell activation	14/608	63/18866	9.78836e-09	3.19776e-07	2.36473e-07	PTPRC/CD80/IL4R/LGALS9/RUNX3/CD83/SASH3/CD86/IL18/CD28/NLRP3/SYK/RIPK2/NCKAP1L	14	Module4
GO:0007229	integrin-mediated signaling pathway	18/608	108/18866	1.02476e-08	3.32439e-07	2.45837e-07	ITGAL/FCER1G/ITGA9/ITGB2/NRP1/ITGAX/TIMP1/PLEK/TYROBP/ITGAM/ITGA4/VAV1/SYK/HCK/FGR/VAV3/FERMT3/RCC2	18	Module4
GO:0006801	superoxide metabolic process	15/608	74/18866	1.11152e-08	3.58079e-07	2.64798e-07	CLEC7A/ITGB2/EDN1/PRKCD/CYBA/CYBB/TYROBP/ACP5/NCF4/ITGAM/SYK/NCF2/NCF1/CYB5R4/NRROS	15	Module4
GO:0032623	interleukin-2 production	13/608	54/18866	1.17169e-08	3.74859e-07	2.77207e-07	PTPRC/HAVCR2/CLEC7A/CD80/FCER1G/SLC11A1/CD4/CD83/VSIG4/SASH3/CD86/CD28/RIPK2	13	Module4
GO:0046634	regulation of alpha-beta T cell activation	17/608	97/18866	1.20243e-08	3.82061e-07	2.82533e-07	PTPRC/CD80/IL4R/LGALS9/RUNX3/CD83/SASH3/CD86/IL18/CD28/NLRP3/LILRB1/SYK/RIPK2/NCKAP1L/CD300A/PRDM1	17	Module4
GO:0045453	bone resorption	14/608	64/18866	1.21624e-08	3.83819e-07	2.83833e-07	SPP1/INPP5D/TPP1/CSK/CTSK/CSF1R/GPR137B/ACP5/TNFRSF11A/P2RX7/RAC2/SYK/ATP6AP1/SNX10	14	Module4
GO:0036336	dendritic cell migration	10/608	29/18866	1.29329e-08	4.05377e-07	2.99775e-07	CCL5/LGALS9/ALOX5/CCR1/GPR183/CCR7/PIK3CG/CXCR4/SLAMF8/DOCK8	10	Module4
GO:0001910	regulation of leukocyte mediated cytotoxicity	15/608	75/18866	1.34862e-08	4.17084e-07	3.08432e-07	PTPRC/HAVCR2/B2M/ICAM1/LGALS9/ARRB2/TYROBP/ITGAM/IL7R/VAV1/P2RX7/LILRB1/CADM1/SERPINB9/FCGR2B	15	Module4
GO:0032418	lysosome localization	15/608	75/18866	1.34862e-08	4.17084e-07	3.08432e-07	FCER1G/VAMP8/LYN/IL4R/LGALS9/BTK/ADORA2B/CD84/PIK3CG/RAC2/SYK/FGR/CD300A/LAT2/MAP6	15	Module4
GO:0002698	negative regulation of immune effector process	19/608	124/18866	1.67389e-08	5.14249e-07	3.80285e-07	PTPRC/HAVCR2/LGALS3/GRN/TMBIM6/IL4R/LGALS9/ARRB2/VSIG4/IL7R/CD84/CR1/PTPN6/LILRB1/SERPINB9/CD300A/FCGR2B/DUSP10/SLAMF8	19	Module4
GO:0007204	positive regulation of cytosolic calcium ion concentration	32/608	322/18866	1.78689e-08	5.45355e-07	4.03289e-07	PTPRC/CEMIP/PDGFRA/CACNB2/NOL3/EDN1/PLCE1/CX3CR1/TMBIM6/LYN/ANK2/CYBA/ATP1A2/CD4/MYO5A/CD52/PTGER4/CCR1/FPR1/GNA15/CCR7/PIK3CG/PTPN6/GNA13/P2RX7/CORO1A/CXCR4/C3AR1/GPR65/FPR3/MCOLN1/C5AR1	32	Module4
GO:0043372	positive regulation of CD4-positive	10/608	30/18866	1.88423e-08	5.71303e-07	4.22477e-07	CD80/IL4R/LGALS9/CD83/SASH3/CD86/IL18/NLRP3/RIPK2/NCKAP1L	10	Module4
GO:0051235	maintenance of location	32/608	324/18866	2.07166e-08	6.23862e-07	4.61344e-07	SCIN/PTPRC/SRGN/CEMIP/NOL3/ABCA1/FTH1/NFKBIA/HEXB/LYN/SP100/ANK2/HK2/CYBA/ATP1A2/APOE/CD4/NFKBIE/MYO5A/ABCG1/PTPN2/CCR7/PTPN6/P2RX7/MSR1/CORO1A/GM2A/SUN2/FTL/TMSB10/MCOLN1/NRROS	32	Module4
GO:0030889	negative regulation of B cell proliferation	8/608	17/18866	2.09e-08	6.23862e-07	4.61344e-07	INPP5D/LYN/TYROBP/MNDA/BTK/CD300A/FCGR2B/TNFRSF21	8	Module4
GO:0046638	positive regulation of alpha-beta T cell differentiation	12/608	47/18866	2.09792e-08	6.23862e-07	4.61344e-07	CD80/IL4R/LGALS9/RUNX3/CD83/SASH3/CD86/IL18/NLRP3/SYK/RIPK2/NCKAP1L	12	Module4
GO:0051701	interaction with host	25/608	212/18866	2.34823e-08	6.93848e-07	5.13099e-07	BCL2L11/CD80/CXADR/CD209/CD74/CTSB/CTSL/VAMP8/VAPB/ICAM1/ANPEP/TRIM14/LGALS9/CD4/DPP4/MRC1/CD86/CR1/CXCR4/SERPINB9/SELPLG/TRIM22/SIGLEC1/CLEC5A/FUCA2	25	Module4
GO:0032102	negative regulation of response to external stimulus	38/608	433/18866	2.4765e-08	7.27118e-07	5.37702e-07	PTPRC/HAVCR2/ADCY7/PDGFRA/NRP1/EDN1/SPP1/GRN/GPX1/TRIB1/PRKCD/SIRPA/LGALS9/APOE/ARRB2/DPP4/NMI/ALOX5/MMP12/ACP5/VSIG4/PTGER4/PTPN2/CR1/NLRP3/LILRB1/AIF1/LILRA2/SERPINB9/PLAUR/FCGR2B/SERPINE2/ADTRP/DUSP10/SLAMF8/PYCARD/PARP14/METRNL	38	Module4
GO:0007015	actin filament organization	38/608	434/18866	2.63335e-08	7.68308e-07	5.68162e-07	SCIN/ARHGAP25/NRP1/ARHGEF10L/MARCKSL1/FSCN1/MARCKS/CAPG/ARPC1B/PRKCD/ICAM1/ROCK2/HCLS1/RHOG/PLEK/IQGAP2/ACTN2/MYO5A/PTGER4/RHOH/PFN2/WAS/CCR7/RAC2/AIF1/HCK/ARPC3/LCP1/CORO1A/NCKAP1L/MYO1F/TPM3/GPR65/MYO1C/TMSB10/PYCARD/ARHGAP18/SHANK3	38	Module4
GO:0052126	movement in host environment	22/608	169/18866	2.72821e-08	7.91011e-07	5.8495e-07	CD80/CXADR/CD209/CD74/CTSB/CTSL/VAMP8/ICAM1/ANPEP/TRIM14/LGALS9/CD4/DPP4/MRC1/CD86/CR1/CXCR4/SELPLG/TRIM22/SIGLEC1/CLEC5A/FUCA2	22	Module4
GO:0042113	B cell activation	32/608	328/18866	2.77336e-08	7.99107e-07	5.90937e-07	PTPRC/SAMSN1/CMTM7/CD74/INPP5D/PRKCD/CTPS1/LYN/HMGB3/TYROBP/MFNG/SASH3/PTPN2/MNDA/GPR183/BTK/CD86/IL7R/ITGA4/CD180/CD28/PTPN6/SYK/NCKAP1L/CD300A/TNFSF13/FCGR2B/LAT2/TNFRSF21/VAV3/SLAMF8/TNFSF13B	32	Module4
GO:0002495	antigen processing and presentation of peptide antigen via MHC class II	17/608	103/18866	3.05603e-08	8.75118e-07	6.47147e-07	FCER1G/CD74/CTSD/HLA-DPB1/LGMN/CTSL/AP2S1/CTSS/DYNC1LI2/HLA-DMB/HLA-DOA/HLA-DRA/FCGR2B/HLA-DPA1/HLA-DMA/TREM2/PYCARD	17	Module4
GO:0060333	interferon-gamma-mediated signaling pathway	16/608	91/18866	3.08118e-08	8.76907e-07	6.4847e-07	HLA-DPB1/IFNGR2/B2M/PRKCD/ICAM1/SP100/NMI/IRF8/PTPN2/PTAFR/HCK/HLA-DRA/HLA-DPA1/TRIM22/FCGR1B/PARP14	16	Module4
GO:0002504	antigen processing and presentation of peptide or polysaccharide antigen via MHC class II	17/608	104/18866	3.54555e-08	1.00291e-06	7.41652e-07	FCER1G/CD74/CTSD/HLA-DPB1/LGMN/CTSL/AP2S1/CTSS/DYNC1LI2/HLA-DMB/HLA-DOA/HLA-DRA/FCGR2B/HLA-DPA1/HLA-DMA/TREM2/PYCARD	17	Module4
GO:0031663	lipopolysaccharide-mediated signaling pathway	13/608	59/18866	3.69082e-08	1.03768e-06	7.67361e-07	CCL5/NFKBIA/CD14/TRIB1/LYN/TLR2/LY86/CD180/PTAFR/IL18/LILRA2/HCK/RIPK2	13	Module4
GO:0072676	lymphocyte migration	18/608	117/18866	3.73346e-08	1.04335e-06	7.71551e-07	CCL5/ITGAL/ICAM1/STK10/CCL4/GPR183/CCL20/ITGA4/CCR7/PIK3CG/AIF1/ECM1/CCL18/ADTRP/PYCARD/HSD3B7/CXCL16/DOCK8	18	Module4
GO:0050869	negative regulation of B cell activation	10/608	32/18866	3.81684e-08	1.06026e-06	7.84058e-07	SAMSN1/INPP5D/LYN/HMGB3/TYROBP/MNDA/BTK/CD300A/FCGR2B/TNFRSF21	10	Module4
GO:0050921	positive regulation of chemotaxis	20/608	144/18866	3.89352e-08	1.07512e-06	7.95049e-07	CCL5/NRP1/EDN1/CD74/LGMN/CSF1R/LGALS9/CCL4/GPSM3/CCR1/PLA2G7/CCR7/RAC2/FGFR1/AIF1/CXCR4/NCKAP1L/C3AR1/TREM2/C5AR1	20	Module4
GO:0050868	negative regulation of T cell activation	18/608	118/18866	4.27547e-08	1.1736e-06	8.67876e-07	GPNMB/HAVCR2/CD80/LGALS3/CD74/IL4R/LGALS9/RUNX3/VSIG4/PTPN2/CD86/PTPN6/LILRB1/LILRB2/CD300A/FCGR2B/TNFRSF21/PAG1	18	Module4
GO:0001774	microglial cell activation	12/608	50/18866	4.46196e-08	1.21047e-06	8.95139e-07	PTPRC/ITGB2/GRN/CTSC/TYROBP/TLR2/ITGAM/AIF1/C1QA/TREM2/C5AR1/TLR8	12	Module4
GO:0002269	leukocyte activation involved in inflammatory response	12/608	50/18866	4.46196e-08	1.21047e-06	8.95139e-07	PTPRC/ITGB2/GRN/CTSC/TYROBP/TLR2/ITGAM/AIF1/C1QA/TREM2/C5AR1/TLR8	12	Module4
GO:0043302	positive regulation of leukocyte degranulation	9/608	25/18866	4.55105e-08	1.22662e-06	9.0708e-07	FCER1G/ITGB2/VAMP8/IL4R/ITGAM/ADORA2B/PTAFR/SYK/FGR	9	Module4
GO:0032732	positive regulation of interleukin-1 production	13/608	60/18866	4.57436e-08	1.22662e-06	9.0708e-07	NLRC4/HAVCR2/CLEC7A/LGALS9/TYROBP/MNDA/CASP1/NLRP3/P2RX7/LILRA2/RIPK2/TLR8/PYCARD	13	Module4
GO:0043087	regulation of GTPase activity	40/608	481/18866	4.65763e-08	1.24177e-06	9.18284e-07	CCL5/TAGAP/DOCK2/ARHGAP25/FGD3/ARHGDIB/DOCK4/NRP1/PLXND1/ARHGEF10L/ICAM1/RGS1/RHOG/ARRB2/IQGAP2/CCL4/GPR137B/RHOH/CCL20/RASGRP3/VAV1/CCR7/PLXNC1/STARD8/EFNA5/NCKAP1L/CCL18/GPR65/TBC1D15/VAV3/ADAP2/ARHGAP10/PYCARD/TBC1D2/ARHGAP9/RCC2/ARHGAP18/SMAP2/DOCK8/ARHGAP30	40	Module4
GO:1902563	regulation of neutrophil activation	7/608	13/18866	5.05705e-08	1.34055e-06	9.91333e-07	ITGB2/GRN/ITGAM/PTAFR/SYK/CD300A/FCGR2B	7	Module4
GO:0022408	negative regulation of cell-cell adhesion	23/608	191/18866	5.78449e-08	1.52467e-06	1.12749e-06	GPNMB/HAVCR2/CD80/LGALS3/CD74/PRKCD/IL4R/LGALS9/RUNX3/VSIG4/PTPN2/CD86/PTPN6/LILRB1/LILRB2/CD300A/FCGR2B/SERPINE2/IL1RN/TNFRSF21/ADTRP/FXYD5/PAG1	23	Module4
GO:0002690	positive regulation of leukocyte chemotaxis	16/608	96/18866	6.74837e-08	1.76237e-06	1.30327e-06	CCL5/EDN1/CD74/LGMN/CSF1R/LGALS9/CCL4/GPSM3/CCR1/PLA2G7/CCR7/RAC2/AIF1/NCKAP1L/C3AR1/C5AR1	16	Module4
GO:0032743	positive regulation of interleukin-2 production	9/608	26/18866	6.76227e-08	1.76237e-06	1.30327e-06	PTPRC/CLEC7A/CD80/CD4/CD83/SASH3/CD86/CD28/RIPK2	9	Module4
GO:0002704	negative regulation of leukocyte mediated immunity	12/608	52/18866	7.1515e-08	1.8534e-06	1.37058e-06	PTPRC/HAVCR2/LGALS9/ARRB2/IL7R/CD84/CR1/PTPN6/LILRB1/SERPINB9/CD300A/FCGR2B	12	Module4
GO:0038093	Fc receptor signaling pathway	26/608	241/18866	7.67457e-08	1.97791e-06	1.46266e-06	PTPRC/FCER1G/FCGR2A/PSME1/ARPC1B/PRKCD/LYN/PSMB10/PSMB9/LCP2/WAS/BTK/VAV1/SYK/HCK/FGR/ARPC3/PSMB8/NCKAP1L/FCGR2B/ITK/LAT2/FCGR1B/MYO1C/VAV3/CLEC4E	26	Module4
GO:0071674	mononuclear cell migration	16/608	97/18866	7.84387e-08	2.01037e-06	1.48666e-06	CCL5/LGALS3/LGMN/LYN/SIRPA/CSF1R/CCL4/CCR1/CCL20/PLA2G7/TNFRSF11A/AIF1/C3AR1/CCL18/SLAMF8/C5AR1	16	Module4
GO:0002761	regulation of myeloid leukocyte differentiation	18/608	123/18866	8.23652e-08	2.09941e-06	1.5525e-06	CD74/INPP5D/LILRB4/TRIB1/LYN/HCLS1/CD4/TYROBP/GPR137B/PTPN2/CCR1/LILRB1/ATP6AP1/LILRB3/EVI2B/MAFB/TREM2/C1QC	18	Module4
GO:0032680	regulation of tumor necrosis factor production	17/608	110/18866	8.32662e-08	2.11077e-06	1.56091e-06	PTPRC/GPNMB/HAVCR2/FCER1G/CD14/SIRPA/CYBA/LGALS9/ARRB2/ACP5/SASH3/TLR2/PTAFR/PTPN6/RIPK2/TREM2/PYCARD	17	Module4
GO:1903038	negative regulation of leukocyte cell-cell adhesion	19/608	137/18866	8.70723e-08	2.19526e-06	1.62339e-06	GPNMB/HAVCR2/CD80/LGALS3/CD74/IL4R/LGALS9/RUNX3/VSIG4/PTPN2/CD86/PTPN6/LILRB1/LILRB2/CD300A/FCGR2B/TNFRSF21/ADTRP/PAG1	19	Module4
GO:0032731	positive regulation of interleukin-1 beta production	12/608	53/18866	8.97642e-08	2.2509e-06	1.66453e-06	NLRC4/CLEC7A/LGALS9/TYROBP/MNDA/CASP1/NLRP3/P2RX7/LILRA2/RIPK2/TLR8/PYCARD	12	Module4
GO:0002832	negative regulation of response to biotic stimulus	16/608	98/18866	9.09888e-08	2.2572e-06	1.6692e-06	HAVCR2/GRN/TRIB1/LGALS9/ARRB2/NMI/MMP12/VSIG4/PTPN2/CR1/LILRB1/LILRA2/SERPINB9/DUSP10/SLAMF8/PARP14	16	Module4
GO:0030316	osteoclast differentiation	16/608	98/18866	9.09888e-08	2.2572e-06	1.6692e-06	OSCAR/FCER1G/INPP5D/LILRB4/CSF1R/TYROBP/GPR137B/CCR1/GPR183/TNFRSF11A/LILRB1/ATP6AP1/LILRB3/SNX10/MAFB/TREM2	16	Module4
GO:0001911	negative regulation of leukocyte mediated cytotoxicity	8/608	20/18866	9.93969e-08	2.44299e-06	1.80658e-06	PTPRC/HAVCR2/LGALS9/ARRB2/IL7R/LILRB1/SERPINB9/FCGR2B	8	Module4
GO:0032633	interleukin-4 production	10/608	35/18866	9.9531e-08	2.44299e-06	1.80658e-06	HAVCR2/FCER1G/LGALS9/CD83/SASH3/CD86/CD28/NLRP3/SYK/ITK	10	Module4
GO:0046637	regulation of alpha-beta T cell differentiation	13/608	64/18866	1.03331e-07	2.52001e-06	1.86354e-06	CD80/IL4R/LGALS9/RUNX3/CD83/SASH3/CD86/IL18/NLRP3/SYK/RIPK2/NCKAP1L/PRDM1	13	Module4
GO:0033003	regulation of mast cell activation	11/608	44/18866	1.03755e-07	2.52001e-06	1.86354e-06	FCER1G/VAMP8/LYN/IL4R/LGALS9/ADORA2B/CD84/RAC2/SYK/FGR/CD300A	11	Module4
GO:0045089	positive regulation of innate immune response	24/608	213/18866	1.07133e-07	2.5885e-06	1.91419e-06	CCL5/NLRC4/HAVCR2/FCER1G/CD209/PSME1/PRKCD/LYN/PSMB10/HEXIM1/HMGB3/PSMB9/MMP12/MNDA/VAV1/SYK/LILRA2/HCK/CADM1/PSMB8/CLEC4E/TLR8/PYCARD/GBP5	24	Module4
GO:0045637	regulation of myeloid cell differentiation	27/608	263/18866	1.20664e-07	2.88537e-06	2.13372e-06	SCIN/LGALS3/MEIS1/CD74/INPP5D/LILRB4/NFKBIA/B2M/TRIB1/LYN/HCLS1/CD4/HMGB3/TYROBP/GPR137B/PTPN2/CCR1/LILRB1/ATP6AP1/NCKAP1L/LILRB3/EVI2B/MAFB/TREM2/MOV10/C1QC/MTURN	27	Module4
GO:0050730	regulation of peptidyl-tyrosine phosphorylation	27/608	263/18866	1.20664e-07	2.88537e-06	2.13372e-06	CCL5/PTPRC/CD80/CNTN1/ITGB2/SAMSN1/NRP1/CD74/PRKCD/LYN/ICAM1/HCLS1/CSF1R/GPRC5A/ARRB2/CD4/PTPN2/IL18/PTPN6/EFNA5/SYK/RIPK2/CD300A/RAP2B/NCF1/TREM2/PARP14	27	Module4
GO:1903555	regulation of tumor necrosis factor superfamily cytokine production	17/608	113/18866	1.24745e-07	2.96766e-06	2.19458e-06	PTPRC/GPNMB/HAVCR2/FCER1G/CD14/SIRPA/CYBA/LGALS9/ARRB2/ACP5/SASH3/TLR2/PTAFR/PTPN6/RIPK2/TREM2/PYCARD	17	Module4
GO:0032729	positive regulation of interferon-gamma production	13/608	65/18866	1.25402e-07	2.96806e-06	2.19487e-06	HAVCR2/CLEC7A/SLC11A1/HLA-DPB1/CD14/LGALS9/IRF8/SASH3/IL18/RIPK2/HLA-DPA1/TLR8/PYCARD	13	Module4
GO:2000516	positive regulation of CD4-positive	10/608	36/18866	1.3386e-07	3.15216e-06	2.33102e-06	CD80/IL4R/LGALS9/CD83/SASH3/CD86/IL18/NLRP3/RIPK2/NCKAP1L	10	Module4
GO:0150076	neuroinflammatory response	14/608	77/18866	1.45142e-07	3.40057e-06	2.51471e-06	PTPRC/ITGB2/GRN/CTSC/MMP9/TYROBP/TLR2/ITGAM/IL18/AIF1/C1QA/TREM2/C5AR1/TLR8	14	Module4
GO:0051051	negative regulation of transport	39/608	483/18866	1.49214e-07	3.4784e-06	2.57227e-06	SRGN/PNKD/LGALS3/MDFIC/EDN1/CD74/TMBIM6/SDCBP/CSK/FABP5/VAMP8/ICAM1/SP100/SIRPA/LGALS9/ATP1A2/APOE/ACTN2/MMP9/SFRP4/APOC1/PTGER4/TLR2/CD84/ADRA2C/LILRB1/LILRB2/KCNAB1/CORO1A/CRYAB/CD300A/FCGR2B/SERPINE2/ADTRP/PID1/RHBDF2/RAB11FIP1/KCNE3/SESTD1	39	Module4
GO:0008360	regulation of cell shape	20/608	156/18866	1.50451e-07	3.48971e-06	2.58063e-06	ITGB2/FGD3/PARVA/PLXND1/FMNL1/HEXB/ICAM1/CSF1R/RHOG/PARVB/RHOH/PLXNC1/GNA13/RAC2/HCK/FGR/CORO1A/LST1/DNMBP/ARHGAP18	20	Module4
GO:0032609	interferon-gamma production	17/608	115/18866	1.62059e-07	3.74026e-06	2.76591e-06	HAVCR2/CLEC7A/SLC11A1/HLA-DPB1/CD14/SIRPA/LGALS9/IRF8/SASH3/IL18/CCR7/LILRB1/RIPK2/ITK/HLA-DPA1/TLR8/PYCARD	17	Module4
GO:0052547	regulation of peptidase activity	38/608	466/18866	1.68149e-07	3.8616e-06	2.85564e-06	NLRC4/BCL2L11/CLEC7A/NOL3/GRN/GPX1/CTSD/PSME1/CSTB/LGMN/COL6A3/TIMP1/CTSH/LYN/ROCK2/SERPINA1/DAPK1/LGALS9/RPS6KA1/ARRB2/MMP9/PSMB9/CASP1/TIMP4/CR1/RENBP/NLRP3/SYK/PSMB8/CRYAB/ECM1/RIPK2/SERPINB9/PLAUR/SERPINE2/TRIAP1/PYCARD/PAPLN	38	Module4
GO:0043367	CD4-positive	14/608	78/18866	1.71723e-07	3.92425e-06	2.90197e-06	CD80/CTSL/IL4R/LGALS9/RUNX3/CD83/PTGER4/SASH3/GPR183/CD86/IL18/NLRP3/RIPK2/NCKAP1L	14	Module4
GO:0032640	tumor necrosis factor production	17/608	116/18866	1.84298e-07	4.19097e-06	3.09921e-06	PTPRC/GPNMB/HAVCR2/FCER1G/CD14/SIRPA/CYBA/LGALS9/ARRB2/ACP5/SASH3/TLR2/PTAFR/PTPN6/RIPK2/TREM2/PYCARD	17	Module4
GO:0030168	platelet activation	20/608	158/18866	1.85899e-07	4.20675e-06	3.11088e-06	PDGFRA/FCER1G/PRKCD/LYN/APOE/ARRB2/PLEK/LCP2/GNA15/ADRA2C/VAV1/PIK3CG/PTPN6/GNA13/SYK/SERPINE2/RAP2B/VAV3/PIK3R5/FERMT3	20	Module4
GO:0031348	negative regulation of defense response	27/608	269/18866	1.91113e-07	4.30376e-06	3.18262e-06	PTPRC/HAVCR2/ADCY7/GRN/GPX1/PRKCD/SIRPA/LGALS9/APOE/ARRB2/NMI/ALOX5/MMP12/ACP5/VSIG4/PTGER4/PTPN2/CR1/NLRP3/LILRB1/SERPINB9/FCGR2B/DUSP10/SLAMF8/PYCARD/PARP14/METRNL	27	Module4
GO:0051480	regulation of cytosolic calcium ion concentration	32/608	357/18866	1.97989e-07	4.43706e-06	3.28119e-06	PTPRC/CEMIP/PDGFRA/CACNB2/NOL3/EDN1/PLCE1/CX3CR1/TMBIM6/LYN/ANK2/CYBA/ATP1A2/CD4/MYO5A/CD52/PTGER4/CCR1/FPR1/GNA15/CCR7/PIK3CG/PTPN6/GNA13/P2RX7/CORO1A/CXCR4/C3AR1/GPR65/FPR3/MCOLN1/C5AR1	32	Module4
GO:0051924	regulation of calcium ion transport	26/608	253/18866	2.02469e-07	4.49721e-06	3.32567e-06	CCL5/CEMIP/CACNB2/LGALS3/TMBIM6/LYN/ICAM1/ANK2/CYBA/ATP1A2/ARRB2/CD4/CCL4/MYO5A/CCR1/CD84/PIK3CG/PTPN6/P2RX7/LILRB1/LILRB2/LILRA2/CORO1A/CXCR4/KCNE3/SESTD1	26	Module4
GO:0006826	iron ion transport	14/608	79/18866	2.02612e-07	4.49721e-06	3.32567e-06	SLC11A1/FLVCR2/ATP6V0B/FTH1/ATP6V0C/ATP6V1B2/B2M/ATP6AP1/SLC39A8/ATP6V0D1/FTL/SLC48A1/SLC22A17/MCOLN1	14	Module4
GO:0071692	protein localization to extracellular region	38/608	470/18866	2.08991e-07	4.61671e-06	3.41404e-06	CCL5/SRGN/TMBIM6/PSAP/CD14/LYN/APOE/PLEK/DPP4/KCNN4/ALOX5/MYO5A/ABCG1/PTGER4/TLR2/NAGPA/LCP2/ADRA2C/NLRP3/P2RX7/EFNA5/SYK/FGR/CADM1/TLR5/TLR1/FCGR2B/IL1RN/ADTRP/CYB5R4/RHBDF2/RAB11FIP1/TREM2/CLEC4E/CLEC5A/TLR8/TNFSF13B/NRROS	38	Module4
GO:0032615	interleukin-12 production	12/608	57/18866	2.11552e-07	4.65114e-06	3.4395e-06	CLEC7A/PRKCD/LGALS9/ARRB2/IRF8/ACP5/TLR2/CCR7/LILRB1/SYK/RIPK2/TLR8	12	Module4
GO:0032649	regulation of interferon-gamma production	16/608	104/18866	2.13028e-07	4.6615e-06	3.44716e-06	HAVCR2/CLEC7A/SLC11A1/HLA-DPB1/CD14/SIRPA/LGALS9/IRF8/SASH3/IL18/CCR7/LILRB1/RIPK2/HLA-DPA1/TLR8/PYCARD	16	Module4
GO:0050766	positive regulation of phagocytosis	13/608	68/18866	2.1923e-07	4.77469e-06	3.53087e-06	PTPRC/DOCK2/CLEC7A/C2/FCER1G/SLC11A1/SIRPA/CYBA/IL2RG/NCKAP1L/FCGR2B/TREM2/PYCARD	13	Module4
GO:0032733	positive regulation of interleukin-10 production	10/608	38/18866	2.34882e-07	5.06164e-06	3.74306e-06	CLEC7A/FCER1G/LGALS9/CD83/SASH3/TLR2/CD28/SYK/TREM2/PYCARD	10	Module4
GO:0046466	membrane lipid catabolic process	10/608	38/18866	2.34882e-07	5.06164e-06	3.74306e-06	NAGA/ASAH1/PSAP/PPT1/HEXB/PRKCD/FUCA1/MGST2/GM2A/GLA	10	Module4
GO:0052548	regulation of endopeptidase activity	36/608	434/18866	2.35679e-07	5.06164e-06	3.74306e-06	NLRC4/BCL2L11/CLEC7A/NOL3/GPX1/CTSD/PSME1/CSTB/LGMN/COL6A3/TIMP1/CTSH/LYN/ROCK2/SERPINA1/DAPK1/LGALS9/RPS6KA1/ARRB2/MMP9/PSMB9/CASP1/TIMP4/CR1/RENBP/NLRP3/SYK/PSMB8/CRYAB/RIPK2/SERPINB9/PLAUR/SERPINE2/TRIAP1/PYCARD/PAPLN	36	Module4
GO:0032928	regulation of superoxide anion generation	8/608	22/18866	2.38302e-07	5.07345e-06	3.7518e-06	CLEC7A/ITGB2/PRKCD/CYBA/TYROBP/ACP5/ITGAM/SYK	8	Module4
GO:0042590	antigen processing and presentation of exogenous peptide antigen via MHC class I	14/608	80/18866	2.38416e-07	5.07345e-06	3.7518e-06	FCER1G/TAPBP/PSME1/B2M/VAMP8/PSMB10/CYBA/CYBB/PSMB9/NCF4/PSMB8/NCF2/NCF1/FCGR1B	14	Module4
GO:0072503	cellular divalent inorganic cation homeostasis	39/608	492/18866	2.40564e-07	5.09579e-06	3.76832e-06	CCL5/PTPRC/CEMIP/PDGFRA/CACNB2/SLC11A1/NOL3/EDN1/PLCE1/CX3CR1/TMBIM6/HEXB/VAPB/LYN/ANK2/CYBA/ATP1A2/APOE/CD4/MYO5A/CD52/PTGER4/CCR1/FPR1/GNA15/CCR7/PIK3CG/PTPN6/GNA13/P2RX7/CORO1A/CXCR4/SLC39A8/C3AR1/GPR65/FPR3/MCOLN1/C5AR1/SLC41A1	39	Module4
GO:0071706	tumor necrosis factor superfamily cytokine production	17/608	119/18866	2.68715e-07	5.66622e-06	4.19015e-06	PTPRC/GPNMB/HAVCR2/FCER1G/CD14/SIRPA/CYBA/LGALS9/ARRB2/ACP5/SASH3/TLR2/PTAFR/PTPN6/RIPK2/TREM2/PYCARD	17	Module4
GO:0043370	regulation of CD4-positive	11/608	48/18866	2.71905e-07	5.70754e-06	4.22071e-06	CD80/IL4R/LGALS9/RUNX3/CD83/SASH3/CD86/IL18/NLRP3/RIPK2/NCKAP1L	11	Module4
GO:0032663	regulation of interleukin-2 production	11/608	49/18866	3.40504e-07	7.11532e-06	5.26176e-06	PTPRC/HAVCR2/CLEC7A/CD80/CD4/CD83/VSIG4/SASH3/CD86/CD28/RIPK2	11	Module4
GO:0050864	regulation of B cell activation	22/608	195/18866	3.54311e-07	7.37062e-06	5.45055e-06	PTPRC/SAMSN1/CD74/INPP5D/LYN/HMGB3/TYROBP/SASH3/MNDA/GPR183/BTK/CD28/PTPN6/SYK/NCKAP1L/CD300A/TNFSF13/FCGR2B/TNFRSF21/VAV3/SLAMF8/TNFSF13B	22	Module4
GO:0071887	leukocyte apoptotic process	16/608	108/18866	3.62661e-07	7.51065e-06	5.5541e-06	CCL5/BCL2L11/FCER1G/LGALS3/CD74/CTSL/LYN/HCLS1/LGALS9/BTK/IL7R/CCR7/P2RX7/LILRB1/TNFRSF21/DOCK8	16	Module4
GO:0009306	protein secretion	37/608	462/18866	3.82557e-07	7.8659e-06	5.81681e-06	CCL5/SRGN/TMBIM6/PSAP/CD14/LYN/APOE/PLEK/DPP4/KCNN4/ALOX5/MYO5A/ABCG1/PTGER4/TLR2/NAGPA/LCP2/ADRA2C/NLRP3/P2RX7/EFNA5/SYK/FGR/CADM1/TLR5/TLR1/FCGR2B/IL1RN/ADTRP/CYB5R4/RHBDF2/RAB11FIP1/TREM2/CLEC4E/CLEC5A/TLR8/TNFSF13B	37	Module4
GO:0061900	glial cell activation	12/608	60/18866	3.83206e-07	7.8659e-06	5.81681e-06	PTPRC/ITGB2/GRN/CTSC/TYROBP/TLR2/ITGAM/AIF1/C1QA/TREM2/C5AR1/TLR8	12	Module4
GO:0035592	establishment of protein localization to extracellular region	37/608	463/18866	4.03401e-07	8.24396e-06	6.09638e-06	CCL5/SRGN/TMBIM6/PSAP/CD14/LYN/APOE/PLEK/DPP4/KCNN4/ALOX5/MYO5A/ABCG1/PTGER4/TLR2/NAGPA/LCP2/ADRA2C/NLRP3/P2RX7/EFNA5/SYK/FGR/CADM1/TLR5/TLR1/FCGR2B/IL1RN/ADTRP/CYB5R4/RHBDF2/RAB11FIP1/TREM2/CLEC4E/CLEC5A/TLR8/TNFSF13B	37	Module4
GO:0098883	synapse pruning	6/608	11/18866	4.39958e-07	8.9516e-06	6.61968e-06	CX3CR1/C1QB/ITGAM/C1QA/TREM2/C1QC	6	Module4
GO:0002821	positive regulation of adaptive immune response	16/608	110/18866	4.68628e-07	9.4933e-06	7.02027e-06	PTPRC/CD80/FCER1G/SLC11A1/B2M/CD4/SASH3/BTK/IL18/CD28/NLRP3/P2RX7/RIPK2/TNFSF13/PYCARD/TNFSF13B	16	Module4
GO:0032673	regulation of interleukin-4 production	9/608	32/18866	5.1054e-07	1.02628e-05	7.5893e-06	HAVCR2/FCER1G/LGALS9/CD83/SASH3/CD86/CD28/NLRP3/SYK	9	Module4
GO:0019377	glycolipid catabolic process	7/608	17/18866	5.12014e-07	1.02628e-05	7.5893e-06	NAGA/PSAP/HEXB/PRKCD/FUCA1/GM2A/GLA	7	Module4
GO:0002407	dendritic cell chemotaxis	8/608	24/18866	5.17674e-07	1.02628e-05	7.5893e-06	CCL5/LGALS9/CCR1/GPR183/CCR7/PIK3CG/CXCR4/SLAMF8	8	Module4
GO:0031342	negative regulation of cell killing	8/608	24/18866	5.17674e-07	1.02628e-05	7.5893e-06	PTPRC/HAVCR2/LGALS9/ARRB2/IL7R/LILRB1/SERPINB9/FCGR2B	8	Module4
GO:0032753	positive regulation of interleukin-4 production	8/608	24/18866	5.17674e-07	1.02628e-05	7.5893e-06	HAVCR2/FCER1G/LGALS9/SASH3/CD86/CD28/NLRP3/SYK	8	Module4
GO:0055074	calcium ion homeostasis	37/608	468/18866	5.24484e-07	1.03192e-05	7.631e-06	CCL5/PTPRC/CEMIP/PDGFRA/CACNB2/NOL3/EDN1/PLCE1/CX3CR1/TMBIM6/HEXB/VAPB/LYN/ANK2/CYBA/ATP1A2/APOE/CD4/MYO5A/CD52/PTGER4/CCR1/FPR1/GNA15/CCR7/PIK3CG/PTPN6/GNA13/P2RX7/CORO1A/CXCR4/C3AR1/GPR65/FPR3/SNX10/MCOLN1/C5AR1	37	Module4
GO:0071675	regulation of mononuclear cell migration	11/608	51/18866	5.24968e-07	1.03192e-05	7.631e-06	CCL5/LGALS3/LGMN/LYN/CSF1R/CCR1/PLA2G7/AIF1/C3AR1/SLAMF8/C5AR1	11	Module4
GO:0051651	maintenance of location in cell	23/608	216/18866	5.44476e-07	1.06575e-05	7.88118e-06	SCIN/PTPRC/SRGN/CEMIP/NOL3/FTH1/LYN/SP100/ANK2/HK2/CYBA/ATP1A2/APOE/CD4/MYO5A/CCR7/PTPN6/P2RX7/CORO1A/SUN2/FTL/TMSB10/MCOLN1	23	Module4
GO:0034109	homotypic cell-cell adhesion	14/608	86/18866	6.00576e-07	1.17062e-05	8.65668e-06	CCL5/PDGFRA/CXADR/PRKCD/LYN/PLEK/DSC2/PIK3CG/PTPN6/SYK/PLAUR/SERPINE2/RAP2B/FERMT3	14	Module4
GO:0019886	antigen processing and presentation of exogenous peptide antigen via MHC class II	15/608	99/18866	6.23725e-07	1.21065e-05	8.95274e-06	FCER1G/CD74/CTSD/HLA-DPB1/LGMN/CTSL/AP2S1/CTSS/DYNC1LI2/HLA-DMB/HLA-DOA/HLA-DRA/FCGR2B/HLA-DPA1/HLA-DMA	15	Module4
GO:0071622	regulation of granulocyte chemotaxis	11/608	52/18866	6.46626e-07	1.24987e-05	9.24278e-06	CCL5/EDN1/CD74/MPP1/CSF1R/DPP4/CCR7/RAC2/NCKAP1L/C3AR1/C5AR1	11	Module4
GO:0002707	negative regulation of lymphocyte mediated immunity	10/608	42/18866	6.50853e-07	1.25282e-05	9.2646e-06	PTPRC/HAVCR2/LGALS9/ARRB2/IL7R/CR1/PTPN6/LILRB1/SERPINB9/FCGR2B	10	Module4
GO:0051047	positive regulation of secretion	30/608	340/18866	6.65691e-07	1.27609e-05	9.43666e-06	SCIN/FCER1G/CACNB2/ITGB2/EDN1/SPP1/SDCBP/CD14/VAMP8/CYBA/IL4R/KCNN4/ABCG1/PTGER4/TLR2/KMO/ITGAM/ADORA2B/PTAFR/TNFRSF11A/P2RX7/SYK/ATP6AP1/FGFR1/FGR/CADM1/SNX5/TREM2/CLEC4E/CLEC5A	30	Module4
GO:0090022	regulation of neutrophil chemotaxis	9/608	33/18866	6.82046e-07	1.30206e-05	9.62871e-06	EDN1/CD74/MPP1/DPP4/CCR7/RAC2/NCKAP1L/C3AR1/C5AR1	9	Module4
GO:0002479	antigen processing and presentation of exogenous peptide antigen via MHC class I	13/608	75/18866	7.19571e-07	1.36807e-05	1.01168e-05	TAPBP/PSME1/B2M/VAMP8/PSMB10/CYBA/CYBB/PSMB9/NCF4/PSMB8/NCF2/NCF1/FCGR1B	13	Module4
GO:0006874	cellular calcium ion homeostasis	36/608	456/18866	7.7394e-07	1.46543e-05	1.08368e-05	CCL5/PTPRC/CEMIP/PDGFRA/CACNB2/NOL3/EDN1/PLCE1/CX3CR1/TMBIM6/HEXB/VAPB/LYN/ANK2/CYBA/ATP1A2/APOE/CD4/MYO5A/CD52/PTGER4/CCR1/FPR1/GNA15/CCR7/PIK3CG/PTPN6/GNA13/P2RX7/CORO1A/CXCR4/C3AR1/GPR65/FPR3/MCOLN1/C5AR1	36	Module4
GO:0014068	positive regulation of phosphatidylinositol 3-kinase signaling	14/608	88/18866	8.0221e-07	1.51279e-05	1.1187e-05	CCL5/PIK3AP1/PDGFRA/LYN/HCLS1/IL18/PIK3CG/CD28/PTPN6/FGFR1/FGR/NCF1/PIK3R5/HCST	14	Module4
GO:0032535	regulation of cellular component size	32/608	383/18866	9.45864e-07	1.77646e-05	1.31369e-05	SCIN/NRP1/EDN1/SPP1/CAPG/ARPC1B/PRKCD/ICAM1/HCLS1/APOE/PLEK/IQGAP2/ACTN2/KCNN4/PFN2/WAS/IL7R/VAV1/CCR7/P2RX7/EFNA5/HCK/ARPC3/CORO1A/NCKAP1L/MYO1C/TMSB10/VAV3/DEPTOR/PYCARD/ARHGAP18/SHANK3	32	Module4
GO:0006968	cellular defense response	11/608	54/18866	9.66528e-07	1.80795e-05	1.33698e-05	CX3CR1/LSP1/TYROBP/MNDA/ADORA2B/LILRB2/NCF2/ITK/NCF1/CLEC5A/C5AR1	11	Module4
GO:0006898	receptor-mediated endocytosis	29/608	328/18866	9.79906e-07	1.82562e-05	1.35004e-05	FCER1G/FCHO2/STAB1/ITGB2/SDCBP/PPT1/CD14/B2M/CTSL/AP2S1/APOE/ARRB2/CD163/SFRP4/APOC1/MRC1/FOLR2/ITGAM/MARCO/ITGA4/LILRB1/SYK/MSR1/FCGR2B/FCGR1B/BMP2K/SIGLEC1/COLEC12/CXCL16	29	Module4
GO:1902905	positive regulation of supramolecular fiber organization	22/608	208/18866	1.07377e-06	1.99249e-05	1.47344e-05	SCIN/NRP1/EDN1/ARHGEF10L/GPX1/ARPC1B/ICAM1/ROCK2/APOE/PLEK/IQGAP2/ACTN2/PFN2/WAS/CCR7/HCK/ARPC3/CORO1A/NCKAP1L/GPR65/MYO1C/PYCARD	22	Module4
GO:0007599	hemostasis	30/608	348/18866	1.08368e-06	2.00286e-05	1.48111e-05	PDGFRA/FCER1G/EDN1/PRKCD/LYN/SERPINA1/PAPSS2/F13A1/APOE/ARRB2/PLEK/LCP2/GNA15/WAS/ADRA2C/VAV1/PIK3CG/PTPN6/GNA13/P2RX7/SYK/PLAUR/SERPINE2/RAP2B/ADTRP/VAV3/PIK3R5/FERMT3/DOCK8/ZNF385A	30	Module4
GO:0032655	regulation of interleukin-12 production	11/608	55/18866	1.17337e-06	2.16002e-05	1.59733e-05	CLEC7A/LGALS9/ARRB2/IRF8/ACP5/TLR2/CCR7/LILRB1/SYK/RIPK2/TLR8	11	Module4
GO:0046849	bone remodeling	14/608	91/18866	1.21904e-06	2.23523e-05	1.65295e-05	SPP1/INPP5D/TPP1/CSK/CTSK/CSF1R/GPR137B/ACP5/TNFRSF11A/P2RX7/RAC2/SYK/ATP6AP1/SNX10	14	Module4
GO:0110053	regulation of actin filament organization	26/608	278/18866	1.24909e-06	2.2812e-05	1.68694e-05	SCIN/NRP1/ARHGEF10L/CAPG/ARPC1B/PRKCD/ICAM1/ROCK2/HCLS1/PLEK/IQGAP2/ACTN2/PTGER4/PFN2/WAS/CCR7/HCK/ARPC3/CORO1A/NCKAP1L/GPR65/MYO1C/TMSB10/PYCARD/ARHGAP18/SHANK3	26	Module4
GO:0032930	positive regulation of superoxide anion generation	7/608	19/18866	1.25395e-06	2.2812e-05	1.68694e-05	CLEC7A/ITGB2/PRKCD/CYBA/TYROBP/ITGAM/SYK	7	Module4
GO:0048771	tissue remodeling	20/608	178/18866	1.28119e-06	2.32166e-05	1.71686e-05	FOXC1/GPNMB/SPP1/INPP5D/TPP1/TIMP1/LIPA/CSK/CTSK/ROCK2/CSF1R/GPR137B/ACP5/IL18/TNFRSF11A/P2RX7/RAC2/SYK/ATP6AP1/SNX10	20	Module4
GO:0001894	tissue homeostasis	25/608	261/18866	1.29085e-06	2.33005e-05	1.72307e-05	FOXC1/CXADR/LYZ/SPP1/INPP5D/TPP1/AKR1B1/LIPA/B2M/CTSH/CSK/CTSK/CSF1R/GPR137B/ACP5/SASH3/TNFRSF11A/P2RX7/RAC2/SYK/ATP6AP1/CORO1A/SLC39A8/SNX10/DRAM2	25	Module4
GO:0002548	monocyte chemotaxis	12/608	67/18866	1.3369e-06	2.39456e-05	1.77077e-05	CCL5/LGALS3/LGMN/LYN/CCL4/CCR1/CCL20/PLA2G7/TNFRSF11A/AIF1/CCL18/SLAMF8	12	Module4
GO:0072678	T cell migration	12/608	67/18866	1.3369e-06	2.39456e-05	1.77077e-05	CCL5/ITGAL/ICAM1/GPR183/CCL20/ITGA4/PIK3CG/AIF1/ECM1/PYCARD/CXCL16/DOCK8	12	Module4
GO:0002824	positive regulation of adaptive immune response based on somatic recombination of immune receptors built from immunoglobulin superfamily domains	15/608	105/18866	1.34905e-06	2.3978e-05	1.77317e-05	PTPRC/CD80/FCER1G/SLC11A1/B2M/CD4/SASH3/BTK/IL18/CD28/NLRP3/P2RX7/RIPK2/TNFSF13/TNFSF13B	15	Module4
GO:1902106	negative regulation of leukocyte differentiation	15/608	105/18866	1.34905e-06	2.3978e-05	1.77317e-05	CD74/INPP5D/LILRB4/TRIB1/LYN/IL4R/HMGB3/GPR137B/RUNX3/PTPN2/LILRB1/LILRB3/FCGR2B/MAFB/C1QC	15	Module4
GO:1901136	carbohydrate derivative catabolic process	21/608	195/18866	1.40312e-06	2.48438e-05	1.83719e-05	CEMIP/NAGA/PSAP/LUM/HEXB/CTSL/PRKCD/FUCA1/UPP1/MMP12/TYMP/GALNS/RENBP/AMPD3/CHI3L1/GM2A/GPD1L/GLA/NAGK/NPL/FUCA2	21	Module4
GO:0048017	inositol lipid-mediated signaling	21/608	196/18866	1.52502e-06	2.68995e-05	1.98921e-05	CCL5/PIK3AP1/PDGFRA/EDN1/PLCE1/IER3/LYN/HCLS1/CSF1R/PTAFR/IL18/PIK3CG/CD28/PTPN6/FGFR1/FGR/SERPINE2/NCF1/ADAP2/PIK3R5/HCST	21	Module4
GO:0043270	positive regulation of ion transport	26/608	284/18866	1.86456e-06	3.2764e-05	2.42289e-05	CCL5/CEMIP/CNTN1/CACNB2/LGALS3/EDN1/PRKCD/VAMP8/CTSS/ANK2/APOE/ARRB2/CD4/ACTN2/CCL4/CCR1/KMO/PTAFR/TNFRSF11A/P2RX7/LILRA2/GPD1L/TRIAP1/TREM2/KCNE3/SHANK3	26	Module4
GO:0030225	macrophage differentiation	10/608	47/18866	1.98088e-06	3.46766e-05	2.56433e-05	TRIB1/HCLS1/CSF1R/CD4/MMP9/CEBPA/TLR2/PTPN2/C1QC/NRROS	10	Module4
GO:0001818	negative regulation of cytokine production	30/608	360/18866	2.17962e-06	3.80123e-05	2.811e-05	PTPRC/GPNMB/HAVCR2/SRGN/ADCY7/SLC11A1/CX3CR1/CSK/SIRPA/LGALS9/ARRB2/NMI/TYROBP/CD83/ACP5/VSIG4/PTGER4/BTK/CD84/CCR7/PTPN6/NLRP3/LILRB1/FGFR1/NCKAP1L/FCGR2B/TNFRSF21/TREM2/TLR8/PYCARD	30	Module4
GO:0007596	blood coagulation	29/608	343/18866	2.41348e-06	4.1933e-05	3.10093e-05	PDGFRA/FCER1G/EDN1/PRKCD/LYN/SERPINA1/PAPSS2/F13A1/APOE/ARRB2/PLEK/LCP2/GNA15/WAS/ADRA2C/VAV1/PIK3CG/PTPN6/GNA13/P2RX7/SYK/PLAUR/SERPINE2/RAP2B/ADTRP/VAV3/PIK3R5/FERMT3/DOCK8	29	Module4
GO:0043030	regulation of macrophage activation	11/608	59/18866	2.4419e-06	4.22685e-05	3.12575e-05	PTPRC/HAVCR2/CD74/GRN/CTSC/IL4R/CEBPA/GPR137B/VSIG4/FCGR2B/TREM2	11	Module4
GO:0033627	cell adhesion mediated by integrin	12/608	71/18866	2.53789e-06	4.37668e-05	3.23654e-05	CCL5/ITGB2/LYN/ICAM1/DPP4/ITGA4/PIK3CG/PTPN6/SYK/NCKAP1L/LPXN/FERMT3	12	Module4
GO:0035710	CD4-positive	14/608	97/18866	2.67231e-06	4.59142e-05	3.39534e-05	CD80/CTSL/IL4R/LGALS9/RUNX3/CD83/PTGER4/SASH3/GPR183/CD86/IL18/NLRP3/RIPK2/NCKAP1L	14	Module4
GO:0046514	ceramide catabolic process	7/608	21/18866	2.73542e-06	4.68252e-05	3.46271e-05	NAGA/ASAH1/PSAP/HEXB/PRKCD/GM2A/GLA	7	Module4
GO:0006911	phagocytosis engulfment	16/608	126/18866	2.97613e-06	5.07584e-05	3.75357e-05	FCER1G/ARHGAP25/ITGB2/ABCA1/RHOG/RHOH/ITGAM/MARCO/RAC2/AIF1/MSR1/NCKAP1L/CD300A/FCGR2B/BIN2/TREM2	16	Module4
GO:2000116	regulation of cysteine-type endopeptidase activity	23/608	239/18866	3.15257e-06	5.35705e-05	3.96152e-05	NLRC4/BCL2L11/CLEC7A/NOL3/GPX1/CTSD/LGMN/CTSH/DAPK1/LGALS9/RPS6KA1/ARRB2/MMP9/PSMB9/CASP1/NLRP3/SYK/CRYAB/RIPK2/SERPINB9/PLAUR/TRIAP1/PYCARD	23	Module4
GO:0042742	defense response to bacterium	29/608	348/18866	3.21506e-06	5.4433e-05	4.02531e-05	NLRC4/HAVCR2/FCER1G/SLC11A1/STAB1/LYZ/GRN/PRKCD/CYBA/CD4/IRF8/ACP5/TLR2/CCL20/NLRP3/P2RX7/TNFSF8/SYK/FGR/RIPK2/TLR5/RNASE6/SLAMF8/TREM2/CLEC4E/C5AR1/COLEC12/PYCARD/MPEG1	29	Module4
GO:0014066	regulation of phosphatidylinositol 3-kinase signaling	16/608	127/18866	3.30533e-06	5.5758e-05	4.12329e-05	CCL5/PIK3AP1/PDGFRA/IER3/LYN/HCLS1/IL18/PIK3CG/CD28/PTPN6/FGFR1/FGR/SERPINE2/NCF1/PIK3R5/HCST	16	Module4
GO:0038094	Fc-gamma receptor signaling pathway	17/608	142/18866	3.34023e-06	5.61425e-05	4.15172e-05	PTPRC/FCER1G/FCGR2A/ARPC1B/PRKCD/LYN/WAS/VAV1/SYK/HCK/FGR/ARPC3/NCKAP1L/FCGR2B/MYO1C/VAV3/CLEC4E	17	Module4
GO:0050817	coagulation	29/608	349/18866	3.40217e-06	5.69772e-05	4.21345e-05	PDGFRA/FCER1G/EDN1/PRKCD/LYN/SERPINA1/PAPSS2/F13A1/APOE/ARRB2/PLEK/LCP2/GNA15/WAS/ADRA2C/VAV1/PIK3CG/PTPN6/GNA13/P2RX7/SYK/PLAUR/SERPINE2/RAP2B/ADTRP/VAV3/PIK3R5/FERMT3/DOCK8	29	Module4
GO:0002474	antigen processing and presentation of peptide antigen via MHC class I	14/608	99/18866	3.42264e-06	5.71137e-05	4.22354e-05	FCER1G/TAPBP/PSME1/B2M/VAMP8/PSMB10/CYBA/CYBB/PSMB9/NCF4/PSMB8/NCF2/NCF1/FCGR1B	14	Module4
GO:0008064	regulation of actin polymerization or depolymerization	20/608	190/18866	3.54494e-06	5.89426e-05	4.35878e-05	SCIN/CAPG/ARPC1B/PRKCD/ICAM1/HCLS1/PLEK/IQGAP2/ACTN2/PFN2/WAS/CCR7/HCK/ARPC3/CORO1A/NCKAP1L/MYO1C/TMSB10/PYCARD/ARHGAP18	20	Module4
GO:2000106	regulation of leukocyte apoptotic process	13/608	86/18866	3.57661e-06	5.92567e-05	4.38202e-05	CCL5/FCER1G/LGALS3/CD74/LYN/HCLS1/LGALS9/BTK/IL7R/CCR7/P2RX7/LILRB1/DOCK8	13	Module4
GO:0010324	membrane invagination	17/608	143/18866	3.67956e-06	6.05718e-05	4.47927e-05	FCER1G/ARHGAP25/FCHO2/ITGB2/ABCA1/RHOG/RHOH/ITGAM/MARCO/RAC2/AIF1/MSR1/NCKAP1L/CD300A/FCGR2B/BIN2/TREM2	17	Module4
GO:1903532	positive regulation of secretion by cell	27/608	313/18866	3.6821e-06	6.05718e-05	4.47927e-05	FCER1G/CACNB2/ITGB2/EDN1/SPP1/SDCBP/CD14/VAMP8/IL4R/KCNN4/ABCG1/PTGER4/TLR2/KMO/ITGAM/ADORA2B/PTAFR/TNFRSF11A/P2RX7/SYK/ATP6AP1/FGFR1/FGR/CADM1/TREM2/CLEC4E/CLEC5A	27	Module4
GO:0030832	regulation of actin filament length	20/608	191/18866	3.84268e-06	6.29901e-05	4.6581e-05	SCIN/CAPG/ARPC1B/PRKCD/ICAM1/HCLS1/PLEK/IQGAP2/ACTN2/PFN2/WAS/CCR7/HCK/ARPC3/CORO1A/NCKAP1L/MYO1C/TMSB10/PYCARD/ARHGAP18	20	Module4
GO:0000041	transition metal ion transport	16/608	129/18866	4.06338e-06	6.63733e-05	4.90828e-05	SLC11A1/FLVCR2/ATP6V0B/FTH1/ATP6V0C/ATP6V1B2/B2M/TCN2/SLC31A2/ATP6AP1/SLC39A8/ATP6V0D1/FTL/SLC48A1/SLC22A17/MCOLN1	16	Module4
GO:0048015	phosphatidylinositol-mediated signaling	20/608	192/18866	4.1629e-06	6.77604e-05	5.01086e-05	CCL5/PIK3AP1/PDGFRA/EDN1/PLCE1/IER3/LYN/HCLS1/CSF1R/PTAFR/IL18/PIK3CG/CD28/PTPN6/FGFR1/FGR/SERPINE2/NCF1/PIK3R5/HCST	20	Module4
GO:0034134	toll-like receptor 2 signaling pathway	6/608	15/18866	4.26734e-06	6.89762e-05	5.10077e-05	PIK3AP1/LYN/CYBA/TLR2/RIPK2/TLR1	6	Module4
GO:0046479	glycosphingolipid catabolic process	6/608	15/18866	4.26734e-06	6.89762e-05	5.10077e-05	NAGA/PSAP/HEXB/PRKCD/GM2A/GLA	6	Module4
GO:0002762	negative regulation of myeloid leukocyte differentiation	10/608	51/18866	4.35272e-06	7.01121e-05	5.18476e-05	INPP5D/LILRB4/TRIB1/LYN/GPR137B/PTPN2/LILRB1/LILRB3/MAFB/C1QC	10	Module4
GO:0002431	Fc receptor mediated stimulatory signaling pathway	17/608	145/18866	4.45272e-06	7.13618e-05	5.27718e-05	PTPRC/FCER1G/FCGR2A/ARPC1B/CSK/PRKCD/LYN/WAS/VAV1/SYK/HCK/FGR/ARPC3/NCKAP1L/FCGR2B/MYO1C/VAV3	17	Module4
GO:1902903	regulation of supramolecular fiber organization	30/608	373/18866	4.46107e-06	7.13618e-05	5.27718e-05	SCIN/NRP1/EDN1/ARHGEF10L/GPX1/CAPG/ARPC1B/PRKCD/ICAM1/ROCK2/HCLS1/APOE/PLEK/IQGAP2/ACTN2/PTGER4/PFN2/WAS/CCR7/HCK/ARPC3/CORO1A/CRYAB/NCKAP1L/GPR65/MYO1C/TMSB10/PYCARD/ARHGAP18/SHANK3	30	Module4
GO:2000514	regulation of CD4-positive	11/608	63/18866	4.78085e-06	7.62143e-05	5.63602e-05	CD80/IL4R/LGALS9/RUNX3/CD83/SASH3/CD86/IL18/NLRP3/RIPK2/NCKAP1L	11	Module4
GO:0070555	response to interleukin-1	21/608	211/18866	4.96416e-06	7.88655e-05	5.83208e-05	CCL5/EDN1/PSME1/NFKBIA/ICAM1/PSMB10/SIRPA/CYBA/LGALS9/CCL4/PSMB9/KMO/CCL20/TNFRSF11A/PSMB8/CHI3L1/RIPK2/CCL18/MAPK13/IL1RN/PYCARD	21	Module4
GO:0034612	response to tumor necrosis factor	27/608	320/18866	5.56011e-06	8.80319e-05	6.50993e-05	CCL5/ASAH1/EDN1/PSME1/NFKBIA/CD14/ICAM1/PSMB10/CYBA/CEBPA/CCL4/PSMB9/PTPN2/CCL20/CASP1/TNFRSF11A/TNFSF8/SYK/PSMB8/CHI3L1/CCL18/TNFSF13/TNFRSF21/PID1/PYCARD/CXCL16/TNFSF13B	27	Module4
GO:0051495	positive regulation of cytoskeleton organization	22/608	230/18866	5.6742e-06	8.95328e-05	6.62092e-05	SCIN/NRP1/EDN1/ARHGEF10L/ARPC1B/ICAM1/ROCK2/HCLS1/PLEK/IQGAP2/ACTN2/PFN2/WAS/CCR7/P2RX7/HCK/ARPC3/CORO1A/NCKAP1L/GPR65/MYO1C/PYCARD	22	Module4
GO:0072511	divalent inorganic cation transport	35/608	478/18866	5.97456e-06	9.39525e-05	6.94776e-05	CCL5/PTPRC/CEMIP/CACNB2/SLC11A1/LGALS3/NOL3/TMBIM6/LYN/ICAM1/ANK2/CYBA/ATP1A2/ARRB2/CD4/TCN2/CCL4/KCNN4/MYO5A/CCR1/CD84/CCR7/PIK3CG/PTPN6/P2RX7/LILRB1/LILRB2/LILRA2/CORO1A/CXCR4/SLC39A8/MCOLN1/KCNE3/SLC41A1/SESTD1	35	Module4
GO:0002456	T cell mediated immunity	14/608	104/18866	6.17772e-06	9.68191e-05	7.15975e-05	PTPRC/SLC11A1/CTSC/B2M/CTSH/ICAM1/SASH3/WAS/IL7R/IL18/NLRP3/P2RX7/LILRB1/FCGR2B	14	Module4
GO:0033008	positive regulation of mast cell activation involved in immune response	6/608	16/18866	6.64186e-06	0.000103395	7.646e-05	FCER1G/VAMP8/IL4R/ADORA2B/SYK/FGR	6	Module4
GO:0043306	positive regulation of mast cell degranulation	6/608	16/18866	6.64186e-06	0.000103395	7.646e-05	FCER1G/VAMP8/IL4R/ADORA2B/SYK/FGR	6	Module4
GO:0015914	phospholipid transport	13/608	91/18866	6.79992e-06	0.000105501	7.80177e-05	ABCA1/NPC2/PLTP/PRKCD/ABCC1/APOE/KCNN4/APOC1/ABCG1/P2RX7/ATP9A/TRIAP1/ATP8B4	13	Module4
GO:0031532	actin cytoskeleton reorganization	14/608	105/18866	6.9206e-06	0.000107016	7.91376e-05	PDGFRA/CXADR/ARHGDIB/NRP1/PARVA/HCLS1/CSF1R/PLEK/IQGAP2/PARVB/HCK/GPR65/PLEK2/PARVG	14	Module4
GO:0099024	plasma membrane invagination	16/608	135/18866	7.3592e-06	0.00011342	8.38735e-05	FCER1G/ARHGAP25/ITGB2/ABCA1/RHOG/RHOH/ITGAM/MARCO/RAC2/AIF1/MSR1/NCKAP1L/CD300A/FCGR2B/BIN2/TREM2	16	Module4
GO:0032757	positive regulation of interleukin-8 production	10/608	54/18866	7.47325e-06	0.000114501	8.4673e-05	CLEC7A/CD74/CD14/LGALS9/TLR2/SYK/TLR5/TLR1/TLR8/PYCARD	10	Module4
GO:0045124	regulation of bone resorption	9/608	43/18866	7.47871e-06	0.000114501	8.4673e-05	SPP1/INPP5D/CSK/CSF1R/GPR137B/TNFRSF11A/P2RX7/SYK/ATP6AP1	9	Module4
GO:0030149	sphingolipid catabolic process	8/608	33/18866	7.56196e-06	0.000115395	8.53339e-05	NAGA/ASAH1/PSAP/PPT1/HEXB/PRKCD/GM2A/GLA	8	Module4
GO:2000377	regulation of reactive oxygen species metabolic process	20/608	200/18866	7.73285e-06	0.000117615	8.69762e-05	CLEC7A/ITGB2/EDN1/CX3CR1/PRKCD/ICAM1/ROCK2/SIRPA/HK2/CYBA/TYROBP/ALOX5/ACP5/ITGAM/RAC2/SYK/AIF1/CRYAB/GLA/PID1	20	Module4
GO:0043547	positive regulation of GTPase activity	31/608	406/18866	8.89202e-06	0.000134804	9.96872e-05	CCL5/TAGAP/DOCK2/ARHGAP25/ARHGDIB/DOCK4/NRP1/ARHGEF10L/ICAM1/RGS1/RHOG/CCL4/CCL20/RASGRP3/VAV1/CCR7/STARD8/NCKAP1L/CCL18/GPR65/TBC1D15/VAV3/ADAP2/ARHGAP10/TBC1D2/ARHGAP9/RCC2/ARHGAP18/SMAP2/DOCK8/ARHGAP30	31	Module4
GO:0050715	positive regulation of cytokine secretion	8/608	34/18866	9.61141e-06	0.000145236	0.000107401	CD14/PTGER4/P2RX7/SYK/FGR/CADM1/CLEC4E/CLEC5A	8	Module4
GO:0014065	phosphatidylinositol 3-kinase signaling	17/608	154/18866	1.00579e-05	0.000151489	0.000112026	CCL5/PIK3AP1/PDGFRA/EDN1/IER3/LYN/HCLS1/IL18/PIK3CG/CD28/PTPN6/FGFR1/FGR/SERPINE2/NCF1/PIK3R5/HCST	17	Module4
GO:0008154	actin polymerization or depolymerization	21/608	221/18866	1.02053e-05	0.000153212	0.0001133	SCIN/CAPG/ARPC1B/PRKCD/ICAM1/HCLS1/PLEK/IQGAP2/ACTN2/PFN2/WAS/CCR7/AIF1/HCK/ARPC3/CORO1A/NCKAP1L/MYO1C/TMSB10/PYCARD/ARHGAP18	21	Module4
GO:0031295	T cell costimulation	10/608	56/18866	1.04939e-05	0.000156531	0.000115754	CD80/CSK/LYN/DPP4/CD86/VAV1/CCR7/CD28/PTPN6/TNFSF13B	10	Module4
GO:1903307	positive regulation of regulated secretory pathway	10/608	56/18866	1.04939e-05	0.000156531	0.000115754	FCER1G/CACNB2/ITGB2/VAMP8/IL4R/ITGAM/ADORA2B/PTAFR/SYK/FGR	10	Module4
GO:0070838	divalent metal ion transport	34/608	471/18866	1.09564e-05	0.000162906	0.000120468	CCL5/PTPRC/CEMIP/CACNB2/SLC11A1/LGALS3/NOL3/TMBIM6/LYN/ICAM1/ANK2/CYBA/ATP1A2/ARRB2/CD4/CCL4/KCNN4/MYO5A/CCR1/CD84/CCR7/PIK3CG/PTPN6/P2RX7/LILRB1/LILRB2/LILRA2/CORO1A/CXCR4/SLC39A8/MCOLN1/KCNE3/SLC41A1/SESTD1	34	Module4
GO:0045638	negative regulation of myeloid cell differentiation	13/608	95/18866	1.10024e-05	0.000163067	0.000120588	MEIS1/INPP5D/LILRB4/NFKBIA/TRIB1/LYN/HMGB3/GPR137B/PTPN2/LILRB1/LILRB3/MAFB/C1QC	13	Module4
GO:0050708	regulation of protein secretion	28/608	352/18866	1.13641e-05	0.000167892	0.000124156	CCL5/SRGN/TMBIM6/CD14/LYN/APOE/DPP4/KCNN4/ALOX5/ABCG1/PTGER4/TLR2/ADRA2C/P2RX7/EFNA5/SYK/FGR/CADM1/TLR5/TLR1/FCGR2B/ADTRP/RHBDF2/RAB11FIP1/TREM2/CLEC4E/CLEC5A/TLR8	28	Module4
GO:0050854	regulation of antigen receptor-mediated signaling pathway	11/608	69/18866	1.18875e-05	0.000175067	0.000129461	PTPRC/LGALS3/LILRB4/LYN/KCNN4/PTPN2/CCR7/PTPN6/CD300A/FCGR2B/LPXN	11	Module4
GO:0071356	cellular response to tumor necrosis factor	25/608	297/18866	1.28036e-05	0.000187961	0.000138997	CCL5/ASAH1/EDN1/PSME1/NFKBIA/ICAM1/PSMB10/CYBA/CEBPA/CCL4/PSMB9/PTPN2/CCL20/CASP1/TNFRSF11A/TNFSF8/SYK/PSMB8/CHI3L1/CCL18/TNFSF13/TNFRSF21/PID1/PYCARD/TNFSF13B	25	Module4
GO:0045060	negative thymic T cell selection	5/608	11/18866	1.34461e-05	0.000195551	0.00014461	PTPRC/DOCK2/CD74/CCR7/CD28	5	Module4
GO:0090023	positive regulation of neutrophil chemotaxis	7/608	26/18866	1.34471e-05	0.000195551	0.00014461	EDN1/CD74/CCR7/RAC2/NCKAP1L/C3AR1/C5AR1	7	Module4
GO:0090025	regulation of monocyte chemotaxis	7/608	26/18866	1.34471e-05	0.000195551	0.00014461	CCL5/LGMN/LYN/CCR1/PLA2G7/AIF1/SLAMF8	7	Module4
GO:0032370	positive regulation of lipid transport	11/608	70/18866	1.36989e-05	0.000198487	0.000146781	EDN1/SPP1/ABCA1/NFKBIA/PLTP/PRKCD/APOE/ABCG1/TNFRSF11A/P2RX7/TRIAP1	11	Module4
GO:0030833	regulation of actin filament polymerization	18/608	174/18866	1.37345e-05	0.000198487	0.000146781	SCIN/CAPG/ARPC1B/PRKCD/ICAM1/HCLS1/IQGAP2/PFN2/WAS/CCR7/HCK/ARPC3/CORO1A/NCKAP1L/MYO1C/TMSB10/PYCARD/ARHGAP18	18	Module4
GO:1990868	response to chemokine	13/608	97/18866	1.38555e-05	0.000198996	0.000147157	CCL5/FOXC1/EDN1/CX3CR1/CXCL2/CCL4/CCR1/CCL20/CCR7/CXCR4/CCL18/TREM2/DOCK8	13	Module4
GO:1990869	cellular response to chemokine	13/608	97/18866	1.38555e-05	0.000198996	0.000147157	CCL5/FOXC1/EDN1/CX3CR1/CXCL2/CCL4/CCR1/CCL20/CCR7/CXCR4/CCL18/TREM2/DOCK8	13	Module4
GO:1903707	negative regulation of hemopoiesis	17/608	158/18866	1.41438e-05	0.00020251	0.000149755	MEIS1/CD74/INPP5D/LILRB4/NFKBIA/TRIB1/LYN/IL4R/HMGB3/GPR137B/RUNX3/PTPN2/LILRB1/LILRB3/FCGR2B/MAFB/C1QC	17	Module4
GO:0031294	lymphocyte costimulation	10/608	58/18866	1.45131e-05	0.000206522	0.000152723	CD80/CSK/LYN/DPP4/CD86/VAV1/CCR7/CD28/PTPN6/TNFSF13B	10	Module4
GO:0045851	pH reduction	10/608	58/18866	1.45131e-05	0.000206522	0.000152723	SLC11A1/ATP6V0B/GRN/ATP6V0C/PPT1/ATP6V1B2/ATP6AP1/ATP6V0D1/DMXL2/SLAMF8	10	Module4
GO:0010543	regulation of platelet activation	8/608	36/18866	1.51337e-05	0.000214695	0.000158766	PDGFRA/FCER1G/PRKCD/LYN/APOE/PLEK/SYK/SERPINE2	8	Module4
GO:0048010	vascular endothelial growth factor receptor signaling pathway	13/608	98/18866	1.55117e-05	0.000219386	0.000162235	FOXC1/NRP2/NRP1/ROCK2/MAPKAPK3/CYBA/CYBB/NCF4/VAV1/NCKAP1L/NCF2/NCF1/VAV3	13	Module4
GO:0002292	T cell differentiation involved in immune response	11/608	71/18866	1.57451e-05	0.00022201	0.000164176	CD80/FCER1G/IL4R/LGALS9/PTGER4/GPR183/CD86/IL18/NLRP3/RIPK2/CLEC4E	11	Module4
GO:1901653	cellular response to peptide	30/608	398/18866	1.58673e-05	0.000223055	0.000164949	BCL2L11/ADCY7/AGTRAP/PTPRE/EDN1/ATP6V0B/ATP6V0C/ATP6V1B2/LGMN/AKR1B1/CSK/PRKCD/LYN/ICAM1/ROCK2/ABCC1/CYBA/ACTN2/MYO5A/PTPN2/ITGA4/ATP6AP1/RIPK2/FCGR2B/ATP6V0D1/MYO1C/ZNF106/SNX5/PID1/TREM2	30	Module4
GO:0030041	actin filament polymerization	19/608	193/18866	1.62296e-05	0.00022746	0.000168206	SCIN/CAPG/ARPC1B/PRKCD/ICAM1/HCLS1/IQGAP2/PFN2/WAS/CCR7/AIF1/HCK/ARPC3/CORO1A/NCKAP1L/MYO1C/TMSB10/PYCARD/ARHGAP18	19	Module4
GO:0002218	activation of innate immune response	16/608	144/18866	1.67988e-05	0.000234727	0.00017358	NLRC4/FCER1G/CD209/PSME1/PRKCD/LYN/PSMB10/HEXIM1/PSMB9/MNDA/SYK/LILRA2/HCK/PSMB8/CLEC4E/PYCARD	16	Module4
GO:0019058	viral life cycle	27/608	341/18866	1.76428e-05	0.00024578	0.000181754	CCL5/CD80/CXADR/CD209/NFIA/CD74/CTSB/CTSL/VAMP8/VAPB/ICAM1/ROCK2/ANPEP/TRIM14/LGALS9/APOE/CD4/DPP4/MRC1/CD86/CR1/CD28/CXCR4/SELPLG/TRIM22/SIGLEC1/CLEC5A	27	Module4
GO:0002791	regulation of peptide secretion	29/608	381/18866	1.82869e-05	0.00025399	0.000187825	CCL5/SRGN/CD74/TMBIM6/CD14/LYN/APOE/DPP4/KCNN4/ALOX5/ABCG1/PTGER4/TLR2/ADRA2C/P2RX7/EFNA5/SYK/FGR/CADM1/TLR5/TLR1/FCGR2B/ADTRP/RHBDF2/RAB11FIP1/TREM2/CLEC4E/CLEC5A/TLR8	29	Module4
GO:0051897	positive regulation of protein kinase B signaling	18/608	178/18866	1.87448e-05	0.00025849	0.000191153	PIK3AP1/CD80/PDGFRA/CX3CR1/GPX1/HCLS1/RHOG/ARRB2/CD86/VAV1/IL18/CCR7/PIK3CG/CD28/RAC2/FGFR1/CHI3L1/PIK3R5	18	Module4
GO:0090322	regulation of superoxide metabolic process	8/608	37/18866	1.87676e-05	0.00025849	0.000191153	CLEC7A/ITGB2/PRKCD/CYBA/TYROBP/ACP5/ITGAM/SYK	8	Module4
GO:0050731	positive regulation of peptidyl-tyrosine phosphorylation	19/608	195/18866	1.8778e-05	0.00025849	0.000191153	CCL5/PTPRC/CD80/CNTN1/NRP1/CD74/LYN/ICAM1/HCLS1/CSF1R/ARRB2/CD4/IL18/EFNA5/SYK/RIPK2/NCF1/TREM2/PARP14	19	Module4
GO:0002820	negative regulation of adaptive immune response	9/608	48/18866	1.92671e-05	0.000263658	0.000194974	PTPRC/HAVCR2/SAMSN1/IL4R/IL7R/CR1/PTPN6/LILRB1/FCGR2B	9	Module4
GO:0033628	regulation of cell adhesion mediated by integrin	9/608	48/18866	1.92671e-05	0.000263658	0.000194974	CCL5/LYN/DPP4/PIK3CG/PTPN6/SYK/NCKAP1L/LPXN/FERMT3	9	Module4
GO:1903305	regulation of regulated secretory pathway	17/608	162/18866	1.96507e-05	0.000268116	0.000198271	FCER1G/CACNB2/ITGB2/VAMP8/LYN/IL4R/LGALS9/PFN2/ITGAM/ADORA2B/CD84/PTAFR/RAC2/SYK/FGR/CD300A/FCGR2B	17	Module4
GO:0070227	lymphocyte apoptotic process	11/608	73/18866	2.06439e-05	0.000280194	0.000207203	CCL5/BCL2L11/LGALS3/CD74/LYN/LGALS9/BTK/IL7R/P2RX7/TNFRSF21/DOCK8	11	Module4
GO:0046629	gamma-delta T cell activation	6/608	19/18866	2.07171e-05	0.000280194	0.000207203	PTPRC/CXADR/LILRB1/SYK/NCKAP1L/ITK	6	Module4
GO:0150146	cell junction disassembly	6/608	19/18866	2.07171e-05	0.000280194	0.000207203	CX3CR1/C1QB/ITGAM/C1QA/TREM2/C1QC	6	Module4
GO:0030838	positive regulation of actin filament polymerization	13/608	101/18866	2.15682e-05	0.000289176	0.000213845	SCIN/ARPC1B/ICAM1/IQGAP2/PFN2/WAS/CCR7/HCK/ARPC3/CORO1A/NCKAP1L/MYO1C/PYCARD	13	Module4
GO:0032637	interleukin-8 production	13/608	101/18866	2.15682e-05	0.000289176	0.000213845	PTPRC/CLEC7A/CD74/CD14/LGALS9/TLR2/SYK/LILRA2/CHI3L1/TLR5/TLR1/TLR8/PYCARD	13	Module4
GO:0045639	positive regulation of myeloid cell differentiation	13/608	101/18866	2.15682e-05	0.000289176	0.000213845	SCIN/CD74/INPP5D/TRIB1/HCLS1/CD4/TYROBP/CCR1/ATP6AP1/NCKAP1L/EVI2B/TREM2/MTURN	13	Module4
GO:0043383	negative T cell selection	5/608	12/18866	2.24392e-05	0.000299986	0.000221839	PTPRC/DOCK2/CD74/CCR7/CD28	5	Module4
GO:0043281	regulation of cysteine-type endopeptidase activity involved in apoptotic process	20/608	215/18866	2.25056e-05	0.00030001	0.000221856	NLRC4/BCL2L11/CLEC7A/NOL3/GPX1/CTSD/CTSH/DAPK1/LGALS9/RPS6KA1/ARRB2/MMP9/CASP1/NLRP3/SYK/CRYAB/SERPINB9/PLAUR/TRIAP1/PYCARD	20	Module4
GO:0006816	calcium ion transport	31/608	426/18866	2.28425e-05	0.000303077	0.000224125	CCL5/PTPRC/CEMIP/CACNB2/LGALS3/NOL3/TMBIM6/LYN/ICAM1/ANK2/CYBA/ATP1A2/ARRB2/CD4/CCL4/KCNN4/MYO5A/CCR1/CD84/CCR7/PIK3CG/PTPN6/P2RX7/LILRB1/LILRB2/LILRA2/CORO1A/CXCR4/MCOLN1/KCNE3/SESTD1	31	Module4
GO:0045058	T cell selection	9/608	49/18866	2.29347e-05	0.000303077	0.000224125	PTPRC/DOCK2/CD74/CTSL/CD4/PTPN2/CCR7/CD28/SYK	9	Module4
GO:0031343	positive regulation of cell killing	10/608	61/18866	2.2997e-05	0.000303077	0.000224125	PTPRC/BCL2L11/CLEC7A/B2M/TYROBP/ITGAM/VAV1/P2RX7/SYK/CADM1	10	Module4
GO:0042267	natural killer cell mediated cytotoxicity	10/608	61/18866	2.2997e-05	0.000303077	0.000224125	HAVCR2/LGALS9/ARRB2/VAV1/IL18/PTPN6/LILRB1/CADM1/CORO1A/SERPINB9	10	Module4
GO:0070098	chemokine-mediated signaling pathway	12/608	88/18866	2.47392e-05	0.000325114	0.000240421	CCL5/FOXC1/EDN1/CX3CR1/CXCL2/CCL4/CCR1/CCL20/CCR7/CXCR4/CCL18/TREM2	12	Module4
GO:0034113	heterotypic cell-cell adhesion	10/608	62/18866	2.66382e-05	0.000348097	0.000257417	PTPRC/ITGB2/CXADR/ITGAX/PARVA/SIRPA/DSC2/ITGA4/LILRB2/IL1RN	10	Module4
GO:0070527	platelet aggregation	10/608	62/18866	2.66382e-05	0.000348097	0.000257417	PDGFRA/PRKCD/LYN/PLEK/PIK3CG/PTPN6/SYK/SERPINE2/RAP2B/FERMT3	10	Module4
GO:0032602	chemokine production	11/608	75/18866	2.68095e-05	0.000349351	0.000258344	HAVCR2/CLEC7A/CD74/SIRPA/LGALS9/TLR2/ADORA2B/IL18/SYK/RIPK2/TREM2	11	Module4
GO:0032760	positive regulation of tumor necrosis factor production	9/608	50/18866	2.71784e-05	0.000351357	0.000259828	PTPRC/FCER1G/CD14/CYBA/SASH3/TLR2/PTAFR/RIPK2/PYCARD	9	Module4
GO:0046850	regulation of bone remodeling	9/608	50/18866	2.71784e-05	0.000351357	0.000259828	SPP1/INPP5D/CSK/CSF1R/GPR137B/TNFRSF11A/P2RX7/SYK/ATP6AP1	9	Module4
GO:0071347	cellular response to interleukin-1	18/608	183/18866	2.72664e-05	0.000351357	0.000259828	CCL5/EDN1/PSME1/NFKBIA/ICAM1/PSMB10/SIRPA/CCL4/PSMB9/KMO/CCL20/PSMB8/CHI3L1/RIPK2/CCL18/MAPK13/IL1RN/PYCARD	18	Module4
GO:1903034	regulation of response to wounding	18/608	183/18866	2.72664e-05	0.000351357	0.000259828	CLEC7A/PDGFRA/FCER1G/EDN1/SPP1/GRN/PRKCD/LYN/APOE/PLEK/RREB1/ALOX5/SYK/CXCR4/PLAUR/SERPINE2/ADTRP/DUSP10	18	Module4
GO:0045577	regulation of B cell differentiation	7/608	29/18866	2.93326e-05	0.000375895	0.000277973	INPP5D/HMGB3/BTK/PTPN6/SYK/NCKAP1L/SLAMF8	7	Module4
GO:0071624	positive regulation of granulocyte chemotaxis	7/608	29/18866	2.93326e-05	0.000375895	0.000277973	EDN1/CD74/CCR7/RAC2/NCKAP1L/C3AR1/C5AR1	7	Module4
GO:0061041	regulation of wound healing	16/608	151/18866	3.04055e-05	0.000388571	0.000287347	CLEC7A/PDGFRA/FCER1G/EDN1/PRKCD/LYN/APOE/PLEK/RREB1/ALOX5/SYK/CXCR4/PLAUR/SERPINE2/ADTRP/DUSP10	16	Module4
GO:0031334	positive regulation of protein-containing complex assembly	22/608	257/18866	3.24602e-05	0.00041369	0.000305922	SCIN/BCL2L11/CLEC7A/LGALS3/ABCA1/FSCN1/ARPC1B/ICAM1/PLEK/IQGAP2/PFN2/WAS/CCR7/SYK/HCK/ARPC3/LCP1/CORO1A/NCKAP1L/MYO1C/PYCARD/GBP5	22	Module4
GO:0034142	toll-like receptor 4 signaling pathway	8/608	40/18866	3.43318e-05	0.000436343	0.000322674	PIK3AP1/ITGB2/NFKBIA/CD14/LYN/ITGAM/LILRA2/RIPK2	8	Module4
GO:0034103	regulation of tissue remodeling	12/608	91/18866	3.48133e-05	0.000440052	0.000325417	GPNMB/SPP1/INPP5D/CSK/ROCK2/CSF1R/GPR137B/IL18/TNFRSF11A/P2RX7/SYK/ATP6AP1	12	Module4
GO:0045921	positive regulation of exocytosis	12/608	91/18866	3.48133e-05	0.000440052	0.000325417	FCER1G/CACNB2/ITGB2/SDCBP/VAMP8/IL4R/ITGAM/ADORA2B/PTAFR/SYK/ATP6AP1/FGR	12	Module4
GO:0042130	negative regulation of T cell proliferation	10/608	64/18866	3.54206e-05	0.00044303	0.00032762	GPNMB/HAVCR2/CD80/LGALS9/VSIG4/CD86/PTPN6/LILRB1/LILRB2/TNFRSF21	10	Module4
GO:2000401	regulation of lymphocyte migration	10/608	64/18866	3.54206e-05	0.00044303	0.00032762	CCL5/STK10/CCL4/CCL20/ITGA4/AIF1/ECM1/ADTRP/PYCARD/DOCK8	10	Module4
GO:0002430	complement receptor mediated signaling pathway	5/608	13/18866	3.54973e-05	0.00044303	0.00032762	FPR1/CR1/C3AR1/FPR3/C5AR1	5	Module4
GO:0002679	respiratory burst involved in defense response	5/608	13/18866	3.54973e-05	0.00044303	0.00032762	GRN/PIK3CG/HCK/DUSP10/SLAMF8	5	Module4
GO:0030198	extracellular matrix organization	29/608	395/18866	3.55265e-05	0.00044303	0.00032762	FOXC1/ITGAL/PDGFRA/ITGA9/ITGB2/ADAMTSL3/ITGAX/SPP1/COL6A3/TGFBI/FSCN1/TIMP1/LUM/PRDX4/CTSL/CTSK/ICAM1/CTSS/DPP4/MMP9/MMP7/MMP12/ITGAM/ITGA4/IBSP/LCP1/SLC39A8/ADTRP/PAPLN	29	Module4
GO:0019722	calcium-mediated signaling	20/608	222/18866	3.56906e-05	0.000443883	0.00032825	PTPRC/EDN1/PLCE1/CX3CR1/ANK2/ATP1A2/PLEK/CD4/CCL4/MYO5A/CCR1/CCL20/BTK/CCR7/P2RX7/SYK/CXCR4/LAT2/TREM2/MCOLN1	20	Module4
GO:0043062	extracellular structure organization	29/608	396/18866	3.71954e-05	0.000461362	0.000341176	FOXC1/ITGAL/PDGFRA/ITGA9/ITGB2/ADAMTSL3/ITGAX/SPP1/COL6A3/TGFBI/FSCN1/TIMP1/LUM/PRDX4/CTSL/CTSK/ICAM1/CTSS/DPP4/MMP9/MMP7/MMP12/ITGAM/ITGA4/IBSP/LCP1/SLC39A8/ADTRP/PAPLN	29	Module4
GO:1903557	positive regulation of tumor necrosis factor superfamily cytokine production	9/608	52/18866	3.76861e-05	0.000466203	0.000344755	PTPRC/FCER1G/CD14/CYBA/SASH3/TLR2/PTAFR/RIPK2/PYCARD	9	Module4
GO:0016137	glycoside metabolic process	6/608	21/18866	3.92146e-05	0.000482538	0.000356835	NAGA/AKR1B1/AKR1A1/FUCA1/GLA/FUCA2	6	Module4
GO:0046641	positive regulation of alpha-beta T cell proliferation	6/608	21/18866	3.92146e-05	0.000482538	0.000356835	PTPRC/LGALS9/IL18/CD28/SYK/RIPK2	6	Module4
GO:0002433	immune response-regulating cell surface receptor signaling pathway involved in phagocytosis	15/608	139/18866	4.32114e-05	0.000528912	0.000391129	PTPRC/FCGR2A/ARPC1B/PRKCD/LYN/WAS/VAV1/SYK/HCK/FGR/ARPC3/NCKAP1L/FCGR2B/MYO1C/VAV3	15	Module4
GO:0038096	Fc-gamma receptor signaling pathway involved in phagocytosis	15/608	139/18866	4.32114e-05	0.000528912	0.000391129	PTPRC/FCGR2A/ARPC1B/PRKCD/LYN/WAS/VAV1/SYK/HCK/FGR/ARPC3/NCKAP1L/FCGR2B/MYO1C/VAV3	15	Module4
GO:0097035	regulation of membrane lipid distribution	9/608	53/18866	4.41125e-05	0.000538521	0.000398235	ABCA1/PRKCD/ABCC1/KCNN4/ABCG1/P2RX7/ATP9A/TRIAP1/ATP8B4	9	Module4
GO:0002228	natural killer cell mediated immunity	10/608	66/18866	4.65667e-05	0.000565978	0.000418539	HAVCR2/LGALS9/ARRB2/VAV1/IL18/PTPN6/LILRB1/CADM1/CORO1A/SERPINB9	10	Module4
GO:0050858	negative regulation of antigen receptor-mediated signaling pathway	7/608	31/18866	4.67277e-05	0.000565978	0.000418539	LGALS3/LILRB4/PTPN2/PTPN6/CD300A/FCGR2B/LPXN	7	Module4
GO:1902624	positive regulation of neutrophil migration	7/608	31/18866	4.67277e-05	0.000565978	0.000418539	EDN1/CD74/CCR7/RAC2/NCKAP1L/C3AR1/C5AR1	7	Module4
GO:1905954	positive regulation of lipid localization	12/608	94/18866	4.827e-05	0.000583137	0.000431228	EDN1/SPP1/ABCA1/NFKBIA/PLTP/PRKCD/APOE/ABCG1/TNFRSF11A/P2RX7/MSR1/TRIAP1	12	Module4
GO:0033005	positive regulation of mast cell activation	6/608	22/18866	5.24574e-05	0.000628811	0.000465004	FCER1G/VAMP8/IL4R/ADORA2B/SYK/FGR	6	Module4
GO:0045061	thymic T cell selection	6/608	22/18866	5.24574e-05	0.000628811	0.000465004	PTPRC/DOCK2/CD74/PTPN2/CCR7/CD28	6	Module4
GO:0045624	positive regulation of T-helper cell differentiation	6/608	22/18866	5.24574e-05	0.000628811	0.000465004	CD80/IL4R/CD86/IL18/NLRP3/RIPK2	6	Module4
GO:0045123	cellular extravasation	10/608	67/18866	5.31787e-05	0.000634179	0.000468974	ITGAL/ITGB2/CX3CR1/ICAM1/SIRPA/PTGER4/ITGA4/PTAFR/PIK3CG/SELPLG	10	Module4
GO:0045670	regulation of osteoclast differentiation	10/608	67/18866	5.31787e-05	0.000634179	0.000468974	INPP5D/LILRB4/TYROBP/GPR137B/CCR1/LILRB1/ATP6AP1/LILRB3/MAFB/TREM2	10	Module4
GO:0001771	immunological synapse formation	5/608	14/18866	5.37557e-05	0.000639417	0.000472847	HAVCR2/DOCK2/LGALS3/CCR7/DOCK8	5	Module4
GO:0002823	negative regulation of adaptive immune response based on somatic recombination of immune receptors built from immunoglobulin superfamily domains	8/608	43/18866	5.94555e-05	0.000705406	0.000521646	PTPRC/HAVCR2/IL4R/IL7R/CR1/PTPN6/LILRB1/FCGR2B	8	Module4
GO:0051452	intracellular pH reduction	9/608	55/18866	5.97687e-05	0.000707314	0.000523057	SLC11A1/ATP6V0B/GRN/ATP6V0C/PPT1/ATP6V1B2/ATP6V0D1/DMXL2/SLAMF8	9	Module4
GO:0032642	regulation of chemokine production	10/608	68/18866	6.05736e-05	0.000713201	0.00052741	HAVCR2/CLEC7A/CD74/SIRPA/LGALS9/TLR2/ADORA2B/SYK/RIPK2/TREM2	10	Module4
GO:0045428	regulation of nitric oxide biosynthetic process	10/608	68/18866	6.05736e-05	0.000713201	0.00052741	CLEC7A/ITGB2/EDN1/CX3CR1/ICAM1/ROCK2/SIRPA/ACP5/AIF1/GLA	10	Module4
GO:0030193	regulation of blood coagulation	11/608	82/18866	6.25294e-05	0.000734364	0.00054306	PDGFRA/FCER1G/EDN1/PRKCD/LYN/APOE/PLEK/SYK/PLAUR/SERPINE2/ADTRP	11	Module4
GO:0060759	regulation of response to cytokine stimulus	18/608	196/18866	6.75551e-05	0.000791384	0.000585226	CCL5/PTPRC/EDN1/CD74/IFNGR2/MMP12/TLR2/PTPN2/CASP1/PTPN6/SYK/CXCR4/ECM1/RIPK2/IL1RN/TREM2/PYCARD/PARP14	18	Module4
GO:0031529	ruffle organization	9/608	56/18866	6.92043e-05	0.000804609	0.000595006	ICAM1/CSF1R/RHOG/PLEK/PFN2/CCR7/AIF1/SNX10/RCC2	9	Module4
GO:0070228	regulation of lymphocyte apoptotic process	9/608	56/18866	6.92043e-05	0.000804609	0.000595006	CCL5/LGALS3/CD74/LYN/LGALS9/BTK/IL7R/P2RX7/DOCK8	9	Module4
GO:1904645	response to amyloid-beta	9/608	56/18866	6.92043e-05	0.000804609	0.000595006	BCL2L11/LGMN/ICAM1/ABCC1/MMP9/MMP12/ITGA4/FCGR2B/TREM2	9	Module4
GO:1900046	regulation of hemostasis	11/608	83/18866	7.00192e-05	0.000812048	0.000600507	PDGFRA/FCER1G/EDN1/PRKCD/LYN/APOE/PLEK/SYK/PLAUR/SERPINE2/ADTRP	11	Module4
GO:0001913	T cell mediated cytotoxicity	8/608	44/18866	7.06377e-05	0.000817177	0.0006043	PTPRC/CTSC/B2M/CTSH/IL7R/P2RX7/LILRB1/FCGR2B	8	Module4
GO:0002576	platelet degranulation	14/608	129/18866	7.24981e-05	0.000836614	0.000618674	SRGN/FCER1G/PSAP/TIMP1/LYN/SERPINA1/F13A1/PLEK/ACTN2/SYK/ECM1/HABP4/LHFPL2/FERMT3	14	Module4
GO:0046209	nitric oxide metabolic process	11/608	84/18866	7.82643e-05	0.000899163	0.000664928	CLEC7A/ITGB2/EDN1/CX3CR1/ICAM1/ROCK2/SIRPA/ACP5/TLR2/AIF1/GLA	11	Module4
GO:0002281	macrophage activation involved in immune response	5/608	15/18866	7.84999e-05	0.000899163	0.000664928	HAVCR2/GRN/TYROBP/SYK/TREM2	5	Module4
GO:0030852	regulation of granulocyte differentiation	5/608	15/18866	7.84999e-05	0.000899163	0.000664928	INPP5D/TRIB1/HCLS1/EVI2B/C1QC	5	Module4
GO:0060760	positive regulation of response to cytokine stimulus	9/608	57/18866	7.9862e-05	0.000912512	0.0006748	EDN1/CD74/MMP12/TLR2/CASP1/CXCR4/RIPK2/TREM2/PARP14	9	Module4
GO:0050830	defense response to Gram-positive bacterium	12/608	99/18866	8.0742e-05	0.000919627	0.000680061	HAVCR2/LYZ/ACP5/TLR2/NLRP3/P2RX7/TNFSF8/FGR/RIPK2/RNASE6/C5AR1/MPEG1	12	Module4
GO:0010950	positive regulation of endopeptidase activity	17/608	181/18866	8.08812e-05	0.000919627	0.000680061	NLRC4/BCL2L11/CLEC7A/CTSD/PSME1/LGMN/CTSH/LYN/ROCK2/DAPK1/LGALS9/CASP1/CR1/NLRP3/SYK/RIPK2/PYCARD	17	Module4
GO:0006869	lipid transport	28/608	393/18866	8.12845e-05	0.000921953	0.000681782	APOL6/EDN1/SPP1/ABCA1/NPC2/PSAP/NFKBIA/PLTP/FABP5/PRKCD/ABCC1/APOE/SLCO2B1/KCNN4/APOC1/ABCG1/AQP9/TNFRSF11A/P2RX7/SYK/MSR1/OSBPL3/GM2A/ATP9A/TRIAP1/CLN8/ATP8B4/SPNS1	28	Module4
GO:0032722	positive regulation of chemokine production	8/608	45/18866	8.35115e-05	0.000944902	0.000698752	HAVCR2/CLEC7A/CD74/LGALS9/TLR2/ADORA2B/SYK/RIPK2	8	Module4
GO:0002763	positive regulation of myeloid leukocyte differentiation	9/608	58/18866	9.18648e-05	0.00103437	0.000764915	CD74/TRIB1/HCLS1/CD4/TYROBP/CCR1/ATP6AP1/EVI2B/TREM2	9	Module4
GO:0031638	zymogen activation	9/608	58/18866	9.18648e-05	0.00103437	0.000764915	NLRC4/LGMN/CTSL/CTSH/RIPK2/CTSZ/C1R/SERPINE2/PYCARD	9	Module4
GO:0001959	regulation of cytokine-mediated signaling pathway	17/608	183/18866	9.26817e-05	0.00104104	0.000769847	CCL5/PTPRC/EDN1/CD74/IFNGR2/MMP12/PTPN2/CASP1/PTPN6/SYK/CXCR4/ECM1/RIPK2/IL1RN/TREM2/PYCARD/PARP14	17	Module4
GO:0010952	positive regulation of peptidase activity	18/608	201/18866	9.3526e-05	0.00104799	0.000774984	NLRC4/BCL2L11/CLEC7A/GRN/CTSD/PSME1/LGMN/CTSH/LYN/ROCK2/DAPK1/LGALS9/CASP1/CR1/NLRP3/SYK/RIPK2/PYCARD	18	Module4
GO:1903531	negative regulation of secretion by cell	16/608	166/18866	9.58052e-05	0.00107094	0.000791957	SRGN/PNKD/EDN1/TMBIM6/VAMP8/LGALS9/APOE/PTGER4/CD84/ADRA2C/LILRB1/CD300A/FCGR2B/ADTRP/RHBDF2/RAB11FIP1	16	Module4
GO:0061515	myeloid cell development	10/608	72/18866	9.9539e-05	0.00111	0.000820844	MEIS1/TYROBP/TLR2/PTPN6/LILRB1/ATP6AP1/NCKAP1L/EVI2B/ZNF385A/NRROS	10	Module4
GO:0010876	lipid localization	30/608	440/18866	0.00010117	0.00112548	0.000832291	APOL6/EDN1/SPP1/ABCA1/NPC2/PSAP/NFKBIA/HEXB/PLTP/FABP5/PRKCD/ABCC1/APOE/SLCO2B1/KCNN4/APOC1/ABCG1/PTPN2/AQP9/TNFRSF11A/P2RX7/SYK/MSR1/OSBPL3/GM2A/ATP9A/TRIAP1/CLN8/ATP8B4/SPNS1	30	Module4
GO:0045454	cell redox homeostasis	9/608	59/18866	0.000105345	0.00116633	0.000862501	SLC11A1/GPX1/PRDX4/CYBA/CYBB/NCF4/RAC2/NCF2/NCF1	9	Module4
GO:0046456	icosanoid biosynthetic process	9/608	59/18866	0.000105345	0.00116633	0.000862501	EDN1/CD74/FABP5/MGST2/ALOX5AP/ALOX5/PTGS1/SYK/TBXAS1	9	Module4
GO:0006691	leukotriene metabolic process	7/608	35/18866	0.000106851	0.00117739	0.000870676	ABCC1/MGST2/ALOX5AP/ALOX5/TLR2/SYK/DPEP2	7	Module4
GO:0032735	positive regulation of interleukin-12 production	7/608	35/18866	0.000106851	0.00117739	0.000870676	CLEC7A/LGALS9/IRF8/TLR2/CCR7/SYK/RIPK2	7	Module4
GO:0048013	ephrin receptor signaling pathway	11/608	87/18866	0.000108164	0.00118623	0.00087721	SDCBP/ARPC1B/AP2S1/LYN/ROCK2/MMP9/EPHB6/EFNA5/ARPC3/VAV3/ANKS1B	11	Module4
GO:2001057	reactive nitrogen species metabolic process	11/608	87/18866	0.000108164	0.00118623	0.00087721	CLEC7A/ITGB2/EDN1/CX3CR1/ICAM1/ROCK2/SIRPA/ACP5/TLR2/AIF1/GLA	11	Module4
GO:0002920	regulation of humoral immune response	14/608	134/18866	0.000109627	0.00119943	0.000886977	PTPRC/C2/CFI/C1QB/VSIG4/CR1/CCR7/PTPN6/C3AR1/FCGR2B/C1R/C1QA/C5AR1/C1QC	14	Module4
GO:0017157	regulation of exocytosis	19/608	222/18866	0.000110447	0.00120487	0.000890996	FCER1G/CACNB2/ITGB2/SDCBP/VAMP8/LYN/IL4R/LGALS9/PFN2/ITGAM/ADORA2B/CD84/PTAFR/RAC2/SYK/ATP6AP1/FGR/CD300A/FCGR2B	19	Module4
GO:0002830	positive regulation of type 2 immune response	5/608	16/18866	0.000111163	0.00120487	0.000890996	CD74/IL4R/CD86/IL18/NLRP3	5	Module4
GO:0032604	granulocyte macrophage colony-stimulating factor production	5/608	16/18866	0.000111163	0.00120487	0.000890996	CD80/CD84/IL18/SYK/LILRA2	5	Module4
GO:0045953	negative regulation of natural killer cell mediated cytotoxicity	5/608	16/18866	0.000111163	0.00120487	0.000890996	HAVCR2/LGALS9/ARRB2/LILRB1/SERPINB9	5	Module4
GO:0051209	release of sequestered calcium ion into cytosol	13/608	118/18866	0.000111639	0.00120616	0.000891953	PTPRC/CEMIP/NOL3/LYN/ANK2/CYBA/ATP1A2/MYO5A/CCR7/PTPN6/P2RX7/CORO1A/MCOLN1	13	Module4
GO:0002709	regulation of T cell mediated immunity	10/608	73/18866	0.000112062	0.00120616	0.000891953	PTPRC/B2M/SASH3/WAS/IL7R/IL18/NLRP3/P2RX7/LILRB1/FCGR2B	10	Module4
GO:0010517	regulation of phospholipase activity	10/608	73/18866	0.000112062	0.00120616	0.000891953	CCL5/PDGFRA/PPT1/GNA15/CD86/PTAFR/GNA13/FGFR1/ITK/C5AR1	10	Module4
GO:0071677	positive regulation of mononuclear cell migration	6/608	25/18866	0.000114662	0.00123056	0.000909993	CCL5/LGALS3/LGMN/CCR1/PLA2G7/AIF1	6	Module4
GO:0030574	collagen catabolic process	8/608	47/18866	0.000115124	0.00123056	0.000909993	CTSD/CTSB/CTSL/CTSK/CTSS/MMP9/MMP7/MMP12	8	Module4
GO:0034204	lipid translocation	8/608	47/18866	0.000115124	0.00123056	0.000909993	ABCA1/PRKCD/ABCC1/KCNN4/ABCG1/P2RX7/ATP9A/ATP8B4	8	Module4
GO:0050853	B cell receptor signaling pathway	14/608	135/18866	0.000118766	0.00126656	0.00093662	PTPRC/KLHL6/LYN/MNDA/BTK/PTPN6/SYK/NCKAP1L/CD300A/FCGR2B/ITK/LAT2/LPXN/VAV3	14	Module4
GO:0050818	regulation of coagulation	11/608	88/18866	0.000120082	0.00127766	0.000944827	PDGFRA/FCER1G/EDN1/PRKCD/LYN/APOE/PLEK/SYK/PLAUR/SERPINE2/ADTRP	11	Module4
GO:0051283	negative regulation of sequestering of calcium ion	13/608	119/18866	0.000121712	0.00129204	0.000955458	PTPRC/CEMIP/NOL3/LYN/ANK2/CYBA/ATP1A2/MYO5A/CCR7/PTPN6/P2RX7/CORO1A/MCOLN1	13	Module4
GO:0002755	MyD88-dependent toll-like receptor signaling pathway	7/608	36/18866	0.000128989	0.00135996	0.00100569	CD14/TLR2/BTK/CD300A/TLR5/TLR1/TLR8	7	Module4
GO:0046633	alpha-beta T cell proliferation	7/608	36/18866	0.000128989	0.00135996	0.00100569	PTPRC/DOCK2/LGALS9/IL18/CD28/SYK/RIPK2	7	Module4
GO:0071402	cellular response to lipoprotein particle stimulus	7/608	36/18866	0.000128989	0.00135996	0.00100569	FCER1G/ITGB2/ABCA1/APOE/ABCG1/SYK/ADTRP	7	Module4
GO:0043405	regulation of MAP kinase activity	25/608	342/18866	0.000129567	0.00136256	0.00100761	PTPRC/MDFIC/EDN1/PLCE1/CD74/TRIB1/CSK/PRKCD/LYN/MAPKAPK3/APOE/FPR1/ADORA2B/PIK3CG/PTPN6/TNFRSF11A/P2RX7/SYK/FGFR1/CXCR4/RIPK2/CD300A/DUSP10/C5AR1/PIK3R5	25	Module4
GO:0030048	actin filament-based movement	15/608	153/18866	0.000129824	0.00136256	0.00100761	CACNB2/PARVA/ANK2/ATP1A2/ACTN2/MYO5A/DSC2/WAS/KCNJ5/SUN2/GPD1L/MYO1F/TPM3/MYO1C/KCNE3	15	Module4
GO:0090382	phagosome maturation	8/608	48/18866	0.000134296	0.00140632	0.00103997	ATP6V0B/ATP6V0C/ATP6V1B2/P2RX7/CORO1A/ATP6V0D1/SLAMF8/MCOLN1	8	Module4
GO:0060249	anatomical structure homeostasis	31/608	469/18866	0.00013665	0.00142774	0.00105581	FOXC1/CACNB2/CXADR/LYZ/SPP1/INPP5D/TPP1/AKR1B1/LIPA/B2M/CTSH/CSK/CTSK/SP100/CSF1R/GPR137B/ACP5/SASH3/TNFRSF11A/P2RX7/RAC2/SYK/ATP6AP1/CORO1A/SLC39A8/PFKM/NOP10/SNX10/DCLRE1B/PKIB/DRAM2	31	Module4
GO:0051056	regulation of small GTPase mediated signal transduction	24/608	323/18866	0.000137145	0.0014297	0.00105726	TAGAP/CYTH4/ARHGAP25/FGD3/ARHGDIB/NRP1/PLCE1/ABCA1/LYN/CYTH1/RHOG/APOE/RHOH/VAV1/STARD8/GNA13/RAC2/FBP1/GPR65/VAV3/ARHGAP10/ARHGAP9/ARHGAP18/ARHGAP30	24	Module4
GO:0030183	B cell differentiation	14/608	137/18866	0.000139042	0.00144622	0.00106948	PTPRC/CMTM7/INPP5D/HMGB3/MFNG/PTPN2/GPR183/BTK/ITGA4/PTPN6/SYK/NCKAP1L/FCGR2B/SLAMF8	14	Module4
GO:0044070	regulation of anion transport	12/608	105/18866	0.000143103	0.00148513	0.00109825	EDN1/PRKCD/ATP1A2/APOE/SFRP4/KMO/PTAFR/TNFRSF11A/P2RX7/SYK/FGFR1/TRIAP1	12	Module4
GO:0051282	regulation of sequestering of calcium ion	13/608	121/18866	0.000144229	0.00149347	0.00110442	PTPRC/CEMIP/NOL3/LYN/ANK2/CYBA/ATP1A2/MYO5A/CCR7/PTPN6/P2RX7/CORO1A/MCOLN1	13	Module4
GO:0043254	regulation of protein-containing complex assembly	30/608	449/18866	0.00014457	0.00149367	0.00110456	SCIN/BCL2L11/CLEC7A/LGALS3/ABCA1/FSCN1/CAPG/ARPC1B/PRKCD/ICAM1/HCLS1/APOE/PLEK/IQGAP2/PTGER4/PFN2/WAS/CCR7/SYK/HCK/ARPC3/LCP1/CORO1A/CRYAB/NCKAP1L/MYO1C/TMSB10/PYCARD/ARHGAP18/GBP5	30	Module4
GO:1905523	positive regulation of macrophage migration	6/608	26/18866	0.000145027	0.00149506	0.0011056	CCL5/CX3CR1/CSF1R/C3AR1/TREM2/C5AR1	6	Module4
GO:0051048	negative regulation of secretion	17/608	190/18866	0.000146752	0.00150949	0.00111626	SRGN/PNKD/EDN1/CD74/TMBIM6/VAMP8/LGALS9/APOE/PTGER4/CD84/ADRA2C/LILRB1/CD300A/FCGR2B/ADTRP/RHBDF2/RAB11FIP1	17	Module4
GO:0016064	immunoglobulin mediated immune response	19/608	227/18866	0.000147929	0.00151824	0.00112273	PTPRC/C2/FCER1G/CFI/CD74/INPP5D/PRKCD/C1QB/IL4R/BTK/CR1/CD28/PTPN6/TNFSF13/FCGR2B/C1R/C1QA/TLR8/C1QC	19	Module4
GO:0002716	negative regulation of natural killer cell mediated immunity	5/608	17/18866	0.00015332	0.00156319	0.00115597	HAVCR2/LGALS9/ARRB2/LILRB1/SERPINB9	5	Module4
GO:0032695	negative regulation of interleukin-12 production	5/608	17/18866	0.00015332	0.00156319	0.00115597	ARRB2/ACP5/CCR7/LILRB1/TLR8	5	Module4
GO:0060263	regulation of respiratory burst	5/608	17/18866	0.00015332	0.00156319	0.00115597	CLEC7A/GRN/RAC2/DUSP10/SLAMF8	5	Module4
GO:0097242	amyloid-beta clearance	7/608	37/18866	0.000154708	0.00157077	0.00116158	ITGB2/APOE/ITGAM/MARCO/MSR1/TREM2/C5AR1	7	Module4
GO:0007265	Ras protein signal transduction	25/608	346/18866	0.000155316	0.00157077	0.00116158	RAB42/CYTH4/ARHGDIB/NRP1/PLCE1/ABCA1/LYN/ROCK2/CYTH1/RHOG/APOE/RREB1/RHOH/WAS/RASGRP3/VAV1/STARD8/GNA13/RAC2/AIF1/FBP1/RRAS/RAP2B/GPR65/DOK3	25	Module4
GO:0090199	regulation of release of cytochrome c from mitochondria	8/608	49/18866	0.000156025	0.00157077	0.00116158	BCL2L11/NOL3/GPX1/ARRB2/MMP9/PLAUR/TRIAP1/PYCARD	8	Module4
GO:2000107	negative regulation of leukocyte apoptotic process	8/608	49/18866	0.000156025	0.00157077	0.00116158	CCL5/FCER1G/CD74/HCLS1/IL7R/CCR7/LILRB1/DOCK8	8	Module4
GO:0002294	CD4-positive alpha-beta T cell differentiation involved in immune response	9/608	62/18866	0.000156101	0.00157077	0.00116158	CD80/IL4R/LGALS9/PTGER4/GPR183/CD86/IL18/NLRP3/RIPK2	9	Module4
GO:0010518	positive regulation of phospholipase activity	9/608	62/18866	0.000156101	0.00157077	0.00116158	CCL5/PDGFRA/GNA15/CD86/PTAFR/GNA13/FGFR1/ITK/C5AR1	9	Module4
GO:0002708	positive regulation of lymphocyte mediated immunity	12/608	106/18866	0.000156735	0.00157077	0.00116158	PTPRC/FCER1G/B2M/SASH3/BTK/VAV1/IL18/CD28/NLRP3/P2RX7/CADM1/TNFSF13	12	Module4
GO:0006690	icosanoid metabolic process	13/608	122/18866	0.000156772	0.00157077	0.00116158	EDN1/CD74/GPX1/FABP5/ABCC1/MGST2/ALOX5AP/ALOX5/TLR2/PTGS1/SYK/TBXAS1/DPEP2	13	Module4
GO:0033077	T cell differentiation in thymus	10/608	76/18866	0.000157906	0.00157872	0.00116746	PTPRC/DOCK2/VNN1/CD74/B2M/PTPN2/IL7R/CCR7/CD28/MAFB	10	Module4
GO:1903426	regulation of reactive oxygen species biosynthetic process	12/608	107/18866	0.000171464	0.00171058	0.00126497	CLEC7A/ITGB2/EDN1/CX3CR1/ICAM1/ROCK2/SIRPA/CYBA/ALOX5/ACP5/AIF1/GLA	12	Module4
GO:0009308	amine metabolic process	14/608	140/18866	0.000175053	0.00174264	0.00128868	ITGB2/PNKD/ODC1/PSME1/PSMB10/SAT1/SULT1A1/PSMB9/KYNU/SLC7A7/KMO/ITGAM/SULT1A2/PSMB8	14	Module4
GO:0019724	B cell mediated immunity	19/608	230/18866	0.000175432	0.00174267	0.0012887	PTPRC/C2/FCER1G/CFI/CD74/INPP5D/PRKCD/C1QB/IL4R/BTK/CR1/CD28/PTPN6/TNFSF13/FCGR2B/C1R/C1QA/TLR8/C1QC	19	Module4
GO:0002287	alpha-beta T cell activation involved in immune response	9/608	63/18866	0.000176991	0.00175066	0.00129461	CD80/IL4R/LGALS9/PTGER4/GPR183/CD86/IL18/NLRP3/RIPK2	9	Module4
GO:0002293	alpha-beta T cell differentiation involved in immune response	9/608	63/18866	0.000176991	0.00175066	0.00129461	CD80/IL4R/LGALS9/PTGER4/GPR183/CD86/IL18/NLRP3/RIPK2	9	Module4
GO:0001961	positive regulation of cytokine-mediated signaling pathway	8/608	50/18866	0.000180567	0.00178223	0.00131796	EDN1/CD74/MMP12/CASP1/CXCR4/RIPK2/TREM2/PARP14	8	Module4
GO:0002825	regulation of T-helper 1 type immune response	6/608	27/18866	0.00018142	0.00178685	0.00132137	HAVCR2/CD80/SLC11A1/IL4R/IL18/RIPK2	6	Module4
GO:2000403	positive regulation of lymphocyte migration	7/608	38/18866	0.000184424	0.00181141	0.00133953	CCL5/CCL4/CCL20/ITGA4/AIF1/PYCARD/DOCK8	7	Module4
GO:0051208	sequestering of calcium ion	13/608	124/18866	0.000184694	0.00181141	0.00133953	PTPRC/CEMIP/NOL3/LYN/ANK2/CYBA/ATP1A2/MYO5A/CCR7/PTPN6/P2RX7/CORO1A/MCOLN1	13	Module4
GO:0060402	calcium ion transport into cytosol	15/608	158/18866	0.00018572	0.00181466	0.00134194	PTPRC/CEMIP/NOL3/TMBIM6/LYN/ANK2/CYBA/ATP1A2/CD4/MYO5A/CCR7/PTPN6/P2RX7/CORO1A/MCOLN1	15	Module4
GO:0022604	regulation of cell morphogenesis	32/608	499/18866	0.000185808	0.00181466	0.00134194	ITGB2/FGD3/NRP1/PARVA/PLXND1/SPP1/FMNL1/HEXB/ICAM1/CSF1R/RHOG/APOE/RREB1/PARVB/RHOH/PTPRD/PLXNC1/GNA13/EFNA5/RAC2/HCK/FGR/CORO1A/CXCR4/LST1/DNMBP/SS18L2/MOV10/RCC2/ARHGAP18/SHANK3/MAP6	32	Module4
GO:2001233	regulation of apoptotic signaling pathway	28/608	413/18866	0.000187667	0.00182896	0.00135251	PTPRC/BCL2L11/LGALS3/VNN1/NOL3/NRP1/CD74/CX3CR1/GPX1/TMBIM6/CTSC/CTSH/PRKCD/ICAM1/SP100/LGALS9/ARRB2/TFDP2/MMP9/PTPN2/FGFR1/BMPR1B/PLAUR/STYXL1/TRIAP1/DEPTOR/PYCARD/ZNF385A	28	Module4
GO:0002524	hypersensitivity	4/608	10/18866	0.000192095	0.00185266	0.00137004	FCER1G/BTK/CCR7/FCGR2B	4	Module4
GO:0002887	negative regulation of myeloid leukocyte mediated immunity	4/608	10/18866	0.000192095	0.00185266	0.00137004	LGALS9/CD84/CD300A/FCGR2B	4	Module4
GO:0016139	glycoside catabolic process	4/608	10/18866	0.000192095	0.00185266	0.00137004	NAGA/FUCA1/GLA/FUCA2	4	Module4
GO:0070391	response to lipoteichoic acid	4/608	10/18866	0.000192095	0.00185266	0.00137004	CD14/TLR2/RIPK2/TREM2	4	Module4
GO:0071223	cellular response to lipoteichoic acid	4/608	10/18866	0.000192095	0.00185266	0.00137004	CD14/TLR2/RIPK2/TREM2	4	Module4
GO:0032677	regulation of interleukin-8 production	11/608	93/18866	0.000197866	0.00190042	0.00140535	PTPRC/CLEC7A/CD74/CD14/LGALS9/TLR2/SYK/TLR5/TLR1/TLR8/PYCARD	11	Module4
GO:1904894	positive regulation of receptor signaling pathway via STAT	11/608	93/18866	0.000197866	0.00190042	0.00140535	CCL5/AKR1B1/LYN/HCLS1/CSF1R/IL10RA/IL7R/IL18/IL10RB/CD300A/PARP14	11	Module4
GO:0032147	activation of protein kinase activity	24/608	331/18866	0.00019835	0.00190113	0.00140588	CCL5/PTPRC/ADCY7/SLC11A1/MDFIC/PLCE1/CD74/PRKCD/MAPKAPK3/GPRC5A/FPR1/CD86/ADORA2B/ADRA2C/IL18/P2RX7/EFNA5/SYK/CXCR4/CHI3L1/RIPK2/NCKAP1L/CD300A/C5AR1	24	Module4
GO:0050728	negative regulation of inflammatory response	17/608	196/18866	0.00021329	0.00204011	0.00150865	PTPRC/ADCY7/GRN/GPX1/PRKCD/SIRPA/APOE/ALOX5/ACP5/PTGER4/PTPN2/NLRP3/FCGR2B/DUSP10/SLAMF8/PYCARD/METRNL	17	Module4
GO:2000249	regulation of actin cytoskeleton reorganization	7/608	39/18866	0.000218586	0.00208246	0.00153997	PDGFRA/ARHGDIB/NRP1/HCLS1/CSF1R/IQGAP2/HCK	7	Module4
GO:0006809	nitric oxide biosynthetic process	10/608	79/18866	0.000218615	0.00208246	0.00153997	CLEC7A/ITGB2/EDN1/CX3CR1/ICAM1/ROCK2/SIRPA/ACP5/AIF1/GLA	10	Module4
GO:0045932	negative regulation of muscle contraction	6/608	28/18866	0.000224656	0.00213125	0.00157605	DOCK4/ATP1A2/ADORA2B/ADRA2C/PIK3CG/KCNE3	6	Module4
GO:1990776	response to angiotensin	6/608	28/18866	0.000224656	0.00213125	0.00157605	AGTRAP/PRKCD/ROCK2/CYBA/ACTN2/CYBB	6	Module4
GO:0006687	glycosphingolipid metabolic process	9/608	65/18866	0.000225789	0.00213762	0.00158076	ST8SIA4/NAGA/ASAH1/CTSA/PSAP/HEXB/PRKCD/GM2A/GLA	9	Module4
GO:0002700	regulation of production of molecular mediator of immune response	14/608	144/18866	0.000235396	0.00222403	0.00164467	PTPRC/FCER1G/CD74/TMBIM6/B2M/IL4R/SASH3/BTK/IL18/CD28/NLRP3/LILRB1/TNFSF13/FCGR2B	14	Module4
GO:0006959	humoral immune response	26/608	377/18866	0.00024167	0.00227867	0.00168507	PTPRC/C2/SLC11A1/CFI/LYZ/CXCL2/PSMB10/C1QB/CD83/ALOX5/VSIG4/GPR183/CR1/CCR7/CD28/PTPN6/C3AR1/FCGR2B/C1R/RNASE6/TNFRSF21/C1QA/TREM1/TREM2/C5AR1/C1QC	26	Module4
GO:0002526	acute inflammatory response	12/608	111/18866	0.000242795	0.00228464	0.00168948	FCER1G/VNN1/ICAM1/SERPINA1/CD163/BTK/CCR7/PIK3CG/TNFRSF11A/NLRP3/FCGR2B/TREM1	12	Module4
GO:0048872	homeostasis of number of cells	20/608	256/18866	0.000252211	0.00236844	0.00175145	BCL2L11/FCER1G/CD74/INPP5D/LIPA/B2M/LYN/HCLS1/LGALS9/SASH3/PTPN2/GPR183/IL7R/CCR7/P2RX7/AMPD3/CORO1A/NCKAP1L/MAFB/TNFSF13B	20	Module4
GO:1903409	reactive oxygen species biosynthetic process	13/608	128/18866	0.000253529	0.002376	0.00175705	CLEC7A/ITGB2/EDN1/CX3CR1/ICAM1/ROCK2/SIRPA/CYBA/CYBB/ALOX5/ACP5/AIF1/GLA	13	Module4
GO:0090026	positive regulation of monocyte chemotaxis	5/608	19/18866	0.000273102	0.00255427	0.00188888	CCL5/LGMN/CCR1/PLA2G7/AIF1	5	Module4
GO:0061756	leukocyte adhesion to vascular endothelial cell	8/608	53/18866	0.000273877	0.00255637	0.00189043	ITGB2/CX3CR1/ICAM1/ALOX5/ITGA4/PTAFR/SLC39A8/SELPLG	8	Module4
GO:0045671	negative regulation of osteoclast differentiation	6/608	29/18866	0.00027561	0.00256224	0.00189477	INPP5D/LILRB4/GPR137B/LILRB1/LILRB3/MAFB	6	Module4
GO:0050690	regulation of defense response to virus by virus	6/608	29/18866	0.00027561	0.00256224	0.00189477	DOCK2/B2M/AP2S1/CD4/CD28/HCK	6	Module4
GO:0043491	protein kinase B signaling	21/608	278/18866	0.000282256	0.00261877	0.00193658	CCL5/PIK3AP1/CD80/PDGFRA/CX3CR1/GPX1/HCLS1/RHOG/ARRB2/CD86/VAV1/IL18/CCR7/PIK3CG/CD28/RAC2/FGFR1/CHI3L1/RRAS/ADTRP/PIK3R5	21	Module4
GO:0034765	regulation of ion transmembrane transport	31/608	489/18866	0.000284731	0.00263646	0.00194966	CEMIP/CACNB2/LYN/CTSS/ANK2/CYBA/DAPK1/ATP1A2/KCNAB2/ACTN2/CYBB/MMP9/SLC31A2/MYO5A/PTAFR/PIK3CG/PTPN6/P2RX7/KCNAB1/KCNC4/KCNJ5/CORO1A/GPD1L/FXYD5/NETO2/TREM2/KCNE3/KCNK17/SESTD1/CLIC6/SHANK3	31	Module4
GO:0002604	regulation of dendritic cell antigen processing and presentation	4/608	11/18866	0.00029418	0.00269172	0.00199052	SLC11A1/CD74/CCR7/FCGR2B	4	Module4
GO:0045628	regulation of T-helper 2 cell differentiation	4/608	11/18866	0.00029418	0.00269172	0.00199052	IL4R/CD86/IL18/NLRP3	4	Module4
GO:0046643	regulation of gamma-delta T cell activation	4/608	11/18866	0.00029418	0.00269172	0.00199052	PTPRC/LILRB1/SYK/NCKAP1L	4	Module4
GO:0070673	response to interleukin-18	4/608	11/18866	0.00029418	0.00269172	0.00199052	ALOX5/IL18/RIPK2/IL18BP	4	Module4
GO:0097048	dendritic cell apoptotic process	4/608	11/18866	0.00029418	0.00269172	0.00199052	LYN/LGALS9/CCR7/LILRB1	4	Module4
GO:2000668	regulation of dendritic cell apoptotic process	4/608	11/18866	0.00029418	0.00269172	0.00199052	LYN/LGALS9/CCR7/LILRB1	4	Module4
GO:0022617	extracellular matrix disassembly	10/608	82/18866	0.000297794	0.00271943	0.00201101	FSCN1/TIMP1/CTSL/CTSK/CTSS/DPP4/MMP9/MMP7/MMP12/LCP1	10	Module4
GO:0030890	positive regulation of B cell proliferation	7/608	41/18866	0.000302184	0.00274869	0.00203265	PTPRC/CD74/SASH3/GPR183/NCKAP1L/VAV3/TNFSF13B	7	Module4
GO:0042269	regulation of natural killer cell mediated cytotoxicity	7/608	41/18866	0.000302184	0.00274869	0.00203265	HAVCR2/LGALS9/ARRB2/VAV1/LILRB1/CADM1/SERPINB9	7	Module4
GO:0034110	regulation of homotypic cell-cell adhesion	6/608	30/18866	0.000335212	0.00304315	0.0022504	CCL5/PRKCD/LYN/SYK/PLAUR/SERPINE2	6	Module4
GO:0010875	positive regulation of cholesterol efflux	5/608	20/18866	0.000354538	0.00321231	0.00237549	ABCA1/NFKBIA/PLTP/APOE/ABCG1	5	Module4
GO:0032720	negative regulation of tumor necrosis factor production	8/608	55/18866	0.000355591	0.00321557	0.0023779	GPNMB/HAVCR2/SIRPA/LGALS9/ARRB2/ACP5/PTPN6/TREM2	8	Module4
GO:0002702	positive regulation of production of molecular mediator of immune response	11/608	100/18866	0.000375387	0.00338798	0.0025054	PTPRC/FCER1G/CD74/B2M/IL4R/SASH3/IL18/CD28/NLRP3/LILRB1/TNFSF13	11	Module4
GO:0002758	innate immune response-activating signal transduction	12/608	117/18866	0.000396275	0.00356955	0.00263967	FCER1G/CD209/PSME1/PRKCD/LYN/PSMB10/PSMB9/SYK/LILRA2/HCK/PSMB8/CLEC4E	12	Module4
GO:0002712	regulation of B cell mediated immunity	8/608	56/18866	0.000403322	0.00360815	0.00266821	PTPRC/FCER1G/BTK/CR1/CD28/PTPN6/TNFSF13/FCGR2B	8	Module4
GO:0002889	regulation of immunoglobulin mediated immune response	8/608	56/18866	0.000403322	0.00360815	0.00266821	PTPRC/FCER1G/BTK/CR1/CD28/PTPN6/TNFSF13/FCGR2B	8	Module4
GO:0050732	negative regulation of peptidyl-tyrosine phosphorylation	8/608	56/18866	0.000403322	0.00360815	0.00266821	PTPRC/SAMSN1/PRKCD/GPRC5A/PTPN2/PTPN6/CD300A/PARP14	8	Module4
GO:0002828	regulation of type 2 immune response	6/608	31/18866	0.000404449	0.00360815	0.00266821	CD74/IL4R/CD86/IL18/NLRP3/ECM1	6	Module4
GO:2000406	positive regulation of T cell migration	6/608	31/18866	0.000404449	0.00360815	0.00266821	CCL5/CCL20/ITGA4/AIF1/PYCARD/DOCK8	6	Module4
GO:0010522	regulation of calcium ion transport into cytosol	11/608	101/18866	0.000409263	0.00363382	0.0026872	CEMIP/TMBIM6/LYN/ANK2/CYBA/ATP1A2/CD4/MYO5A/PTPN6/P2RX7/CORO1A	11	Module4
GO:0060191	regulation of lipase activity	11/608	101/18866	0.000409263	0.00363382	0.0026872	CCL5/PDGFRA/PPT1/APOC1/GNA15/CD86/PTAFR/GNA13/FGFR1/ITK/C5AR1	11	Module4
GO:0050856	regulation of T cell receptor signaling pathway	7/608	43/18866	0.000409676	0.00363382	0.0026872	LGALS3/LILRB4/KCNN4/PTPN2/CCR7/PTPN6/CD300A	7	Module4
GO:0007249	I-kappaB kinase/NF-kappaB signaling	21/608	286/18866	0.000412453	0.00365147	0.00270025	CD74/CX3CR1/NFKBIA/CD14/PRDX4/ROCK2/SIRPA/TRIM14/TLE1/LGALS9/CD4/TLR2/RHOH/BTK/CASP1/CCR7/ECM1/RIPK2/TRIM22/TLR8/PYCARD	21	Module4
GO:0019932	second-messenger-mediated signaling	29/608	456/18866	0.000420679	0.0037172	0.00274886	PTPRC/ADCY7/EDN1/PLCE1/CX3CR1/ABCA1/ANK2/ATP1A2/APOE/PLEK/CD4/CCL4/MYO5A/PTGER4/CCR1/FPR1/CCL20/BTK/ADORA2B/ADRA2C/CCR7/GNA13/P2RX7/SYK/CXCR4/LAT2/GPR65/TREM2/MCOLN1	29	Module4
GO:0015748	organophosphate ester transport	13/608	135/18866	0.000427029	0.00372203	0.00275243	ABCA1/NPC2/PLTP/PRKCD/ABCC1/APOE/KCNN4/APOC1/ABCG1/P2RX7/ATP9A/TRIAP1/ATP8B4	13	Module4
GO:0032368	regulation of lipid transport	13/608	135/18866	0.000427029	0.00372203	0.00275243	EDN1/SPP1/ABCA1/NFKBIA/PLTP/PRKCD/APOE/APOC1/ABCG1/TNFRSF11A/P2RX7/SYK/TRIAP1	13	Module4
GO:0001821	histamine secretion	4/608	12/18866	0.000430051	0.00372203	0.00275243	EDN1/VAMP8/LYN/BTK	4	Module4
GO:0002468	dendritic cell antigen processing and presentation	4/608	12/18866	0.000430051	0.00372203	0.00275243	SLC11A1/CD74/CCR7/FCGR2B	4	Module4
GO:0002863	positive regulation of inflammatory response to antigenic stimulus	4/608	12/18866	0.000430051	0.00372203	0.00275243	FCER1G/BTK/CCR7/CD28	4	Module4
GO:0002923	regulation of humoral immune response mediated by circulating immunoglobulin	4/608	12/18866	0.000430051	0.00372203	0.00275243	PTPRC/CR1/PTPN6/FCGR2B	4	Module4
GO:0006002	fructose 6-phosphate metabolic process	4/608	12/18866	0.000430051	0.00372203	0.00275243	HK2/HK3/FBP1/PFKM	4	Module4
GO:0032494	response to peptidoglycan	4/608	12/18866	0.000430051	0.00372203	0.00275243	NLRP3/RIPK2/TREM2/C5AR1	4	Module4
GO:0032621	interleukin-18 production	4/608	12/18866	0.000430051	0.00372203	0.00275243	TLR2/CD84/NLRP3/GBP5	4	Module4
GO:0033700	phospholipid efflux	4/608	12/18866	0.000430051	0.00372203	0.00275243	ABCA1/APOE/APOC1/ABCG1	4	Module4
GO:0043301	negative regulation of leukocyte degranulation	4/608	12/18866	0.000430051	0.00372203	0.00275243	LGALS9/CD84/CD300A/FCGR2B	4	Module4
GO:1904062	regulation of cation transmembrane transport	24/608	349/18866	0.000431265	0.00372558	0.00275505	CEMIP/CACNB2/LYN/CTSS/ANK2/CYBA/DAPK1/ATP1A2/KCNAB2/ACTN2/MMP9/SLC31A2/MYO5A/PIK3CG/PTPN6/KCNAB1/CORO1A/GPD1L/FXYD5/NETO2/TREM2/KCNE3/SESTD1/SHANK3	24	Module4
GO:1905952	regulation of lipid localization	15/608	171/18866	0.000437516	0.00377256	0.0027898	EDN1/SPP1/ABCA1/NFKBIA/PLTP/PRKCD/APOE/APOC1/ABCG1/PTPN2/TNFRSF11A/P2RX7/SYK/MSR1/TRIAP1	15	Module4
GO:0001776	leukocyte homeostasis	10/608	86/18866	0.000439403	0.0037818	0.00279663	BCL2L11/FCER1G/CD74/LYN/LGALS9/GPR183/P2RX7/CORO1A/NCKAP1L/TNFSF13B	10	Module4
GO:1903556	negative regulation of tumor necrosis factor superfamily cytokine production	8/608	57/18866	0.000456132	0.00391127	0.00289237	GPNMB/HAVCR2/SIRPA/LGALS9/ARRB2/ACP5/PTPN6/TREM2	8	Module4
GO:1905517	macrophage migration	8/608	57/18866	0.000456132	0.00391127	0.00289237	CCL5/LGALS3/CX3CR1/CSF1R/C3AR1/SLAMF8/TREM2/C5AR1	8	Module4
GO:0042088	T-helper 1 type immune response	7/608	44/18866	0.000473819	0.00402572	0.00297701	HAVCR2/CD80/SLC11A1/IL4R/IL18/RIPK2/IL18BP	7	Module4
GO:0045332	phospholipid translocation	7/608	44/18866	0.000473819	0.00402572	0.00297701	ABCA1/PRKCD/ABCC1/KCNN4/P2RX7/ATP9A/ATP8B4	7	Module4
GO:0097028	dendritic cell differentiation	7/608	44/18866	0.000473819	0.00402572	0.00297701	LYN/LGALS9/CCR7/LILRB1/LILRB2/FCGR2B/TREM2	7	Module4
GO:1905521	regulation of macrophage migration	7/608	44/18866	0.000473819	0.00402572	0.00297701	CCL5/CX3CR1/CSF1R/C3AR1/SLAMF8/TREM2/C5AR1	7	Module4
GO:2000404	regulation of T cell migration	7/608	44/18866	0.000473819	0.00402572	0.00297701	CCL5/CCL20/ITGA4/AIF1/ECM1/PYCARD/DOCK8	7	Module4
GO:0045589	regulation of regulatory T cell differentiation	6/608	32/18866	0.000484361	0.00409602	0.00302899	LILRB4/LGALS9/CR1/CD28/LILRB2/DUSP10	6	Module4
GO:0071353	cellular response to interleukin-4	6/608	32/18866	0.000484361	0.00409602	0.00302899	IL4R/IL2RG/MRC1/PTPN2/CORO1A/PARP14	6	Module4
GO:0006885	regulation of pH	11/608	103/18866	0.000484741	0.00409602	0.00302899	SLC11A1/EDN1/ATP6V0B/GRN/ATP6V0C/PPT1/ATP6V1B2/ATP6AP1/ATP6V0D1/DMXL2/SLAMF8	11	Module4
GO:0032273	positive regulation of protein polymerization	13/608	137/18866	0.000492074	0.00415042	0.00306922	SCIN/ARPC1B/ICAM1/IQGAP2/PFN2/WAS/CCR7/HCK/ARPC3/CORO1A/NCKAP1L/MYO1C/PYCARD	13	Module4
GO:1903793	positive regulation of anion transport	8/608	58/18866	0.000514414	0.00433098	0.00320274	EDN1/PRKCD/APOE/KMO/PTAFR/TNFRSF11A/P2RX7/TRIAP1	8	Module4
GO:0032271	regulation of protein polymerization	18/608	231/18866	0.0005211	0.00437932	0.00323849	SCIN/CAPG/ARPC1B/PRKCD/ICAM1/HCLS1/IQGAP2/PFN2/WAS/CCR7/HCK/ARPC3/CORO1A/NCKAP1L/MYO1C/TMSB10/PYCARD/ARHGAP18	18	Module4
GO:0002715	regulation of natural killer cell mediated immunity	7/608	45/18866	0.000545717	0.00456965	0.00337924	HAVCR2/LGALS9/ARRB2/VAV1/LILRB1/CADM1/SERPINB9	7	Module4
GO:1904646	cellular response to amyloid-beta	7/608	45/18866	0.000545717	0.00456965	0.00337924	BCL2L11/LGMN/ICAM1/ABCC1/ITGA4/FCGR2B/TREM2	7	Module4
GO:0050765	negative regulation of phagocytosis	5/608	22/18866	0.000570906	0.00476851	0.0035263	CSK/SIRPA/TLR2/CD300A/FCGR2B	5	Module4
GO:0097006	regulation of plasma lipoprotein particle levels	11/608	105/18866	0.000571523	0.00476851	0.0035263	ABCA1/NPC2/LIPA/PLTP/AP2S1/CSK/APOE/APOC1/ABCG1/PLA2G7/MSR1	11	Module4
GO:0002861	regulation of inflammatory response to antigenic stimulus	6/608	33/18866	0.000576045	0.00478902	0.00354146	FCER1G/GPX1/BTK/CCR7/CD28/FCGR2B	6	Module4
GO:0046640	regulation of alpha-beta T cell proliferation	6/608	33/18866	0.000576045	0.00478902	0.00354146	PTPRC/LGALS9/IL18/CD28/SYK/RIPK2	6	Module4
GO:0051928	positive regulation of calcium ion transport	12/608	122/18866	0.000580402	0.00481642	0.00356173	CCL5/CEMIP/CACNB2/LGALS3/ANK2/ARRB2/CD4/CCL4/CCR1/P2RX7/LILRA2/KCNE3	12	Module4
GO:0051896	regulation of protein kinase B signaling	19/608	253/18866	0.000581418	0.00481642	0.00356173	PIK3AP1/CD80/PDGFRA/CX3CR1/GPX1/HCLS1/RHOG/ARRB2/CD86/VAV1/IL18/CCR7/PIK3CG/CD28/RAC2/FGFR1/CHI3L1/RRAS/PIK3R5	19	Module4
GO:0034121	regulation of toll-like receptor signaling pathway	9/608	74/18866	0.000604112	0.00495324	0.00366291	CD14/LYN/CYBA/ARRB2/TLR2/LILRA2/CD300A/TLR5/TLR1	9	Module4
GO:0097553	calcium ion transmembrane import into cytosol	13/608	140/18866	0.000605269	0.00495324	0.00366291	PTPRC/CEMIP/NOL3/LYN/ANK2/CYBA/ATP1A2/MYO5A/CCR7/PTPN6/P2RX7/CORO1A/MCOLN1	13	Module4
GO:0002921	negative regulation of humoral immune response	4/608	13/18866	0.000605408	0.00495324	0.00366291	VSIG4/CR1/PTPN6/FCGR2B	4	Module4
GO:0045579	positive regulation of B cell differentiation	4/608	13/18866	0.000605408	0.00495324	0.00366291	INPP5D/BTK/SYK/NCKAP1L	4	Module4
GO:0046348	amino sugar catabolic process	4/608	13/18866	0.000605408	0.00495324	0.00366291	RENBP/CHI3L1/NAGK/NPL	4	Module4
GO:1902285	semaphorin-plexin signaling pathway involved in neuron projection guidance	4/608	13/18866	0.000605408	0.00495324	0.00366291	NRP2/NRP1/PLXND1/PLXNC1	4	Module4
GO:2001198	regulation of dendritic cell differentiation	4/608	13/18866	0.000605408	0.00495324	0.00366291	LGALS9/LILRB1/LILRB2/FCGR2B	4	Module4
GO:2000379	positive regulation of reactive oxygen species metabolic process	11/608	106/18866	0.000619551	0.00506003	0.00374188	CLEC7A/ITGB2/EDN1/PRKCD/ICAM1/CYBA/TYROBP/ITGAM/SYK/AIF1/PID1	11	Module4
GO:0010863	positive regulation of phospholipase C activity	7/608	46/18866	0.000626028	0.00510395	0.00377435	PDGFRA/GNA15/CD86/PTAFR/FGFR1/ITK/C5AR1	7	Module4
GO:0046427	positive regulation of receptor signaling pathway via JAK-STAT	10/608	90/18866	0.000632931	0.00515117	0.00380928	CCL5/AKR1B1/LYN/HCLS1/CSF1R/IL10RA/IL18/IL10RB/CD300A/PARP14	10	Module4
GO:0051092	positive regulation of NF-kappaB transcription factor activity	14/608	159/18866	0.000646828	0.00525482	0.00388592	NLRC4/ITGB2/CX3CR1/ICAM1/TRIM14/LGALS9/TLR2/BTK/IL18/TNFRSF11A/NLRP3/RIPK2/TRIM22/PYCARD	14	Module4
GO:0001836	release of cytochrome c from mitochondria	8/608	60/18866	0.000649065	0.00525482	0.00388592	BCL2L11/NOL3/GPX1/ARRB2/MMP9/PLAUR/TRIAP1/PYCARD	8	Module4
GO:0042093	T-helper cell differentiation	8/608	60/18866	0.000649065	0.00525482	0.00388592	CD80/IL4R/PTGER4/GPR183/CD86/IL18/NLRP3/RIPK2	8	Module4
GO:0060401	cytosolic calcium ion transport	15/608	178/18866	0.000666918	0.00538995	0.00398585	PTPRC/CEMIP/NOL3/TMBIM6/LYN/ANK2/CYBA/ATP1A2/CD4/MYO5A/CCR7/PTPN6/P2RX7/CORO1A/MCOLN1	15	Module4
GO:0044242	cellular lipid catabolic process	18/608	236/18866	0.00067048	0.00540931	0.00400017	IDH1/NAGA/ASAH1/PSAP/PPT1/HEXB/FABP5/PRKCD/FUCA1/MGST2/APOC1/ACADL/PLA2G7/PIK3CG/GM2A/GLA/ADTRP/PLBD2	18	Module4
GO:0030851	granulocyte differentiation	6/608	34/18866	0.000680647	0.00547231	0.00404675	INPP5D/TRIB1/HCLS1/CEBPA/EVI2B/C1QC	6	Module4
GO:0055094	response to lipoprotein particle	6/608	34/18866	0.000680647	0.00547231	0.00404675	FCER1G/ITGB2/ABCA1/APOE/SYK/ADTRP	6	Module4
GO:0046777	protein autophosphorylation	18/608	237/18866	0.000704408	0.00565354	0.00418078	PTPRC/GPNMB/PDGFRA/CSK/LYN/MAPKAPK3/STK10/CSF1R/DAPK1/SLA/STK17B/BTK/SYK/FGFR1/HCK/FGR/ITK/RAP2B	18	Module4
GO:0006907	pinocytosis	5/608	23/18866	0.000710311	0.00566174	0.00418684	DOCK2/PPT1/MAPKAPK3/SNX5/PYCARD	5	Module4
GO:0007035	vacuolar acidification	5/608	23/18866	0.000710311	0.00566174	0.00418684	SLC11A1/GRN/PPT1/ATP6V0D1/DMXL2	5	Module4
GO:0072677	eosinophil migration	5/608	23/18866	0.000710311	0.00566174	0.00418684	CCL5/LGALS3/CCL4/PTGER4/CD300A	5	Module4
GO:1904996	positive regulation of leukocyte adhesion to vascular endothelial cell	5/608	23/18866	0.000710311	0.00566174	0.00418684	ITGB2/ICAM1/ALOX5/ITGA4/PTAFR	5	Module4
GO:0007157	heterophilic cell-cell adhesion via plasma membrane cell adhesion molecules	7/608	47/18866	0.000715437	0.00569281	0.00420982	ITGAL/CXADR/CD209/ICAM1/PTPRD/CADM1/IGSF21	7	Module4
GO:0060193	positive regulation of lipase activity	9/608	76/18866	0.000735664	0.00584374	0.00432143	CCL5/PDGFRA/GNA15/CD86/PTAFR/GNA13/FGFR1/ITK/C5AR1	9	Module4
GO:0051346	negative regulation of hydrolase activity	29/608	473/18866	0.000754144	0.00598029	0.00442241	LGALS3/NOL3/GPX1/TMBIM6/CSTB/COL6A3/TIMP1/ROCK2/SERPINA1/RPS6KA1/ARRB2/IQGAP2/MMP9/APOC1/RHOH/PPP1R1A/TIMP4/CR1/RENBP/CRYAB/ECM1/SERPINB9/NCKAP1L/PLAUR/SERPINE2/STYXL1/TRIAP1/RCC2/PAPLN	29	Module4
GO:0031098	stress-activated protein kinase signaling cascade	21/608	300/18866	0.000768463	0.00608345	0.00449869	MDFIC/EDN1/SDCBP/AKR1B1/TRIB1/LYN/SIRPA/LGALS9/PTGER4/ADORA2B/CCR7/TNFRSF11A/SYK/CRYAB/RIPK2/MAPK13/FCGR2B/NCF1/DUSP10/PYCARD/MTURN	21	Module4
GO:0016042	lipid catabolic process	23/608	343/18866	0.000795314	0.00627453	0.00463999	IDH1/NAGA/ASAH1/PLCE1/SPP1/PSAP/PPT1/LIPA/HEXB/FABP5/PRKCD/FUCA1/APOE/CYP27A1/MGST2/APOC1/ACADL/PLA2G7/PIK3CG/GM2A/GLA/ADTRP/PLBD2	23	Module4
GO:0001914	regulation of T cell mediated cytotoxicity	6/608	35/18866	0.000799363	0.00627453	0.00463999	PTPRC/B2M/IL7R/P2RX7/LILRB1/FCGR2B	6	Module4
GO:0045066	regulatory T cell differentiation	6/608	35/18866	0.000799363	0.00627453	0.00463999	LILRB4/LGALS9/CR1/CD28/LILRB2/DUSP10	6	Module4
GO:0070670	response to interleukin-4	6/608	35/18866	0.000799363	0.00627453	0.00463999	IL4R/IL2RG/MRC1/PTPN2/CORO1A/PARP14	6	Module4
GO:0098751	bone cell development	6/608	35/18866	0.000799363	0.00627453	0.00463999	MEIS1/TYROBP/PTPN6/LILRB1/ATP6AP1/ZNF385A	6	Module4
GO:0002260	lymphocyte homeostasis	8/608	62/18866	0.000810787	0.00635345	0.00469836	BCL2L11/CD74/LYN/LGALS9/P2RX7/CORO1A/NCKAP1L/TNFSF13B	8	Module4
GO:1900274	regulation of phospholipase C activity	7/608	48/18866	0.000814656	0.006373	0.00471281	PDGFRA/GNA15/CD86/PTAFR/FGFR1/ITK/C5AR1	7	Module4
GO:0045185	maintenance of protein location	10/608	93/18866	0.000820265	0.00638286	0.0047201	SCIN/SRGN/NFKBIA/SP100/HK2/CD4/NFKBIE/SUN2/TMSB10/NRROS	10	Module4
GO:1903035	negative regulation of response to wounding	10/608	93/18866	0.000820265	0.00638286	0.0047201	PDGFRA/EDN1/SPP1/PRKCD/APOE/ALOX5/PLAUR/SERPINE2/ADTRP/DUSP10	10	Module4
GO:0032488	Cdc42 protein signal transduction	4/608	14/18866	0.000826069	0.00638286	0.0047201	NRP1/ABCA1/APOE/WAS	4	Module4
GO:0045059	positive thymic T cell selection	4/608	14/18866	0.000826069	0.00638286	0.0047201	PTPRC/DOCK2/CD74/PTPN2	4	Module4
GO:0045591	positive regulation of regulatory T cell differentiation	4/608	14/18866	0.000826069	0.00638286	0.0047201	LILRB4/LGALS9/LILRB2/DUSP10	4	Module4
GO:0051709	regulation of killing of cells of other organism	4/608	14/18866	0.000826069	0.00638286	0.0047201	BCL2L11/CLEC7A/P2RX7/SYK	4	Module4
GO:0031214	biomineral tissue development	14/608	163/18866	0.000826923	0.00638286	0.0047201	GPNMB/SRGN/SPP1/ROCK2/ALOX5/CCR1/P2RX7/IBSP/FGR/ECM1/BMPR1B/BMP2K/SNX10/HEY2	14	Module4
GO:0110148	biomineralization	14/608	163/18866	0.000826923	0.00638286	0.0047201	GPNMB/SRGN/SPP1/ROCK2/ALOX5/CCR1/P2RX7/IBSP/FGR/ECM1/BMPR1B/BMP2K/SNX10/HEY2	14	Module4
GO:0006664	glycolipid metabolic process	11/608	110/18866	0.0008466	0.00652388	0.00482439	ST8SIA4/NAGA/ASAH1/CTSA/PSAP/HEXB/PRKCD/FUCA1/GM2A/GLA/GBGT1	11	Module4
GO:0051090	regulation of DNA-binding transcription factor activity	28/608	455/18866	0.000873362	0.00669906	0.00495393	NLRC4/HAVCR2/ITGB2/EDN1/CX3CR1/NFKBIA/SGK1/TRIB1/ICAM1/SP100/HCLS1/TRIM14/LGALS9/ARRB2/NFKBIE/SFRP4/TLR2/BTK/IL18/TNFRSF11A/NLRP3/SYK/HCK/RIPK2/TRIM22/PYCARD/MTURN/LPAR5	28	Module4
GO:0002438	acute inflammatory response to antigenic stimulus	5/608	24/18866	0.000873665	0.00669906	0.00495393	FCER1G/ICAM1/BTK/CCR7/FCGR2B	5	Module4
GO:0098581	detection of external biotic stimulus	5/608	24/18866	0.000873665	0.00669906	0.00495393	NLRC4/CLEC7A/TLR2/TLR1/TREM2	5	Module4
GO:0061045	negative regulation of wound healing	9/608	78/18866	0.000889674	0.00681056	0.00503639	PDGFRA/EDN1/PRKCD/APOE/ALOX5/PLAUR/SERPINE2/ADTRP/DUSP10	9	Module4
GO:0030641	regulation of cellular pH	10/608	94/18866	0.000892	0.00681711	0.00504123	SLC11A1/ATP6V0B/GRN/ATP6V0C/PPT1/ATP6V1B2/ATP6AP1/ATP6V0D1/DMXL2/SLAMF8	10	Module4
GO:1903509	liposaccharide metabolic process	11/608	111/18866	0.000913018	0.00696627	0.00515153	ST8SIA4/NAGA/ASAH1/CTSA/PSAP/HEXB/PRKCD/FUCA1/GM2A/GLA/GBGT1	11	Module4
GO:0002673	regulation of acute inflammatory response	7/608	49/18866	0.000924428	0.00704174	0.00520735	FCER1G/BTK/CCR7/PIK3CG/TNFRSF11A/NLRP3/FCGR2B	7	Module4
GO:0009595	detection of biotic stimulus	6/608	36/18866	0.000933438	0.00707552	0.00523233	NLRC4/CLEC7A/TLR2/NLRP3/TLR1/TREM2	6	Module4
GO:0033572	transferrin transport	6/608	36/18866	0.000933438	0.00707552	0.00523233	ATP6V0B/ATP6V0C/ATP6V1B2/ATP6AP1/ATP6V0D1/MCOLN1	6	Module4
GO:0045622	regulation of T-helper cell differentiation	6/608	36/18866	0.000933438	0.00707552	0.00523233	CD80/IL4R/CD86/IL18/NLRP3/RIPK2	6	Module4
GO:0038061	NIK/NF-kappaB signaling	15/608	184/18866	0.000938285	0.00710066	0.00525092	HAVCR2/EDN1/PSME1/NFKBIA/CD14/PSMB10/LGALS9/PSMB9/TLR2/CD86/IL18/NLRP3/PSMB8/CHI3L1/TREM2	15	Module4
GO:0045862	positive regulation of proteolysis	24/608	370/18866	0.000980139	0.00740532	0.00547621	NLRC4/BCL2L11/CLEC7A/GRN/CTSD/PSME1/LGMN/CTSC/TRIB1/CTSH/LYN/ROCK2/DAPK1/LGALS9/APOE/CEBPA/CASP1/CR1/NLRP3/SYK/RIPK2/TREM2/PYCARD/RNF144B	24	Module4
GO:0002437	inflammatory response to antigenic stimulus	8/608	64/18866	0.00100338	0.00756857	0.00559694	FCER1G/GPX1/ICAM1/BTK/CCR7/CD28/FCGR2B/IL1RN	8	Module4
GO:0046942	carboxylic acid transport	23/608	350/18866	0.00104292	0.0078541	0.00580809	SLC11A1/EDN1/PSAP/FABP5/ABCC1/ATP1A2/APOE/SLCO2B1/NFKBIE/SLC7A7/FOLR2/KMO/AQP9/TNFRSF11A/SLC16A6/P2RX7/SYK/SLC38A6/SLC26A10/SLC38A7/SLC16A10/EMB/SLC16A9	23	Module4
GO:0030195	negative regulation of blood coagulation	7/608	50/18866	0.00104552	0.0078609	0.00581311	PDGFRA/EDN1/PRKCD/APOE/PLAUR/SERPINE2/ADTRP	7	Module4
GO:1904385	cellular response to angiotensin	5/608	25/18866	0.00106342	0.0079825	0.00590303	AGTRAP/PRKCD/ROCK2/CYBA/ACTN2	5	Module4
GO:1901224	positive regulation of NIK/NF-kappaB signaling	9/608	80/18866	0.00106889	0.00801065	0.00592385	HAVCR2/EDN1/CD14/LGALS9/TLR2/CD86/IL18/CHI3L1/TREM2	9	Module4
GO:0044106	cellular amine metabolic process	12/608	131/18866	0.00109266	0.00813613	0.00601664	ITGB2/PNKD/ODC1/PSME1/PSMB10/SAT1/PSMB9/KYNU/SLC7A7/KMO/ITGAM/PSMB8	12	Module4
GO:0002864	regulation of acute inflammatory response to antigenic stimulus	4/608	15/18866	0.00109791	0.00813613	0.00601664	FCER1G/BTK/CCR7/FCGR2B	4	Module4
GO:0032645	regulation of granulocyte macrophage colony-stimulating factor production	4/608	15/18866	0.00109791	0.00813613	0.00601664	CD80/CD84/IL18/SYK	4	Module4
GO:0045064	T-helper 2 cell differentiation	4/608	15/18866	0.00109791	0.00813613	0.00601664	IL4R/CD86/IL18/NLRP3	4	Module4
GO:0045779	negative regulation of bone resorption	4/608	15/18866	0.00109791	0.00813613	0.00601664	INPP5D/CSK/GPR137B/P2RX7	4	Module4
GO:0051608	histamine transport	4/608	15/18866	0.00109791	0.00813613	0.00601664	EDN1/VAMP8/LYN/BTK	4	Module4
GO:0097202	activation of cysteine-type endopeptidase activity	4/608	15/18866	0.00109791	0.00813613	0.00601664	NLRC4/LGMN/RIPK2/PYCARD	4	Module4
GO:0048247	lymphocyte chemotaxis	8/608	65/18866	0.00111251	0.00823118	0.00608693	CCL5/CCL4/GPR183/CCL20/PIK3CG/CCL18/HSD3B7/CXCL16	8	Module4
GO:0030004	cellular monovalent inorganic cation homeostasis	11/608	114/18866	0.00113862	0.00841091	0.00621984	SLC11A1/ATP6V0B/GRN/ATP6V0C/PPT1/ATP6V1B2/ATP1A2/ATP6AP1/ATP6V0D1/DMXL2/SLAMF8	11	Module4
GO:0015849	organic acid transport	23/608	353/18866	0.00116789	0.00860694	0.0063648	SLC11A1/EDN1/PSAP/FABP5/ABCC1/ATP1A2/APOE/SLCO2B1/NFKBIE/SLC7A7/FOLR2/KMO/AQP9/TNFRSF11A/SLC16A6/P2RX7/SYK/SLC38A6/SLC26A10/SLC38A7/SLC16A10/EMB/SLC16A9	23	Module4
GO:0033238	regulation of cellular amine metabolic process	9/608	81/18866	0.00116887	0.00860694	0.0063648	ITGB2/PNKD/ODC1/PSME1/PSMB10/PSMB9/SLC7A7/ITGAM/PSMB8	9	Module4
GO:0043277	apoptotic cell clearance	7/608	51/18866	0.00117873	0.00865212	0.00639822	C2/RHOG/TYROBP/RHOH/MARCO/RAC2/TREM2	7	Module4
GO:1900047	negative regulation of hemostasis	7/608	51/18866	0.00117873	0.00865212	0.00639822	PDGFRA/EDN1/PRKCD/APOE/PLAUR/SERPINE2/ADTRP	7	Module4
GO:1904892	regulation of receptor signaling pathway via STAT	13/608	151/18866	0.00122601	0.00897079	0.00663387	CCL5/PTPRC/AKR1B1/LYN/HCLS1/CSF1R/IL10RA/PTPN2/IL7R/IL18/IL10RB/CD300A/PARP14	13	Module4
GO:2001056	positive regulation of cysteine-type endopeptidase activity	13/608	151/18866	0.00122601	0.00897079	0.00663387	NLRC4/BCL2L11/CLEC7A/CTSD/LGMN/CTSH/DAPK1/LGALS9/CASP1/NLRP3/SYK/RIPK2/PYCARD	13	Module4
GO:0001783	B cell apoptotic process	5/608	26/18866	0.00128208	0.00935152	0.00691542	BCL2L11/CD74/LYN/BTK/TNFRSF21	5	Module4
GO:0097066	response to thyroid hormone	5/608	26/18866	0.00128208	0.00935152	0.00691542	CTSB/AKR1B1/CTSL/CTSH/CTSS	5	Module4
GO:0002220	innate immune response activating cell surface receptor signaling pathway	11/608	116/18866	0.00131311	0.00956279	0.00707166	FCER1G/CD209/PSME1/PRKCD/LYN/PSMB10/PSMB9/SYK/LILRA2/PSMB8/CLEC4E	11	Module4
GO:0030100	regulation of endocytosis	16/608	210/18866	0.00132092	0.00960462	0.00710259	LGALS3/SDCBP/PPT1/CD14/B2M/AP2S1/APOE/ARRB2/SFRP4/APOC1/LILRB1/SYK/NCKAP1L/CD300A/BMP2K/TREM2	16	Module4
GO:0001912	positive regulation of leukocyte mediated cytotoxicity	7/608	52/18866	0.00132488	0.00961836	0.00711274	PTPRC/B2M/TYROBP/ITGAM/VAV1/P2RX7/CADM1	7	Module4
GO:0007040	lysosome organization	8/608	67/18866	0.00135914	0.00982096	0.00726257	ABCA1/GRN/TPP1/PPT1/HEXB/NAGPA/P2RX7/CORO1A	8	Module4
GO:0080171	lytic vacuole organization	8/608	67/18866	0.00135914	0.00982096	0.00726257	ABCA1/GRN/TPP1/PPT1/HEXB/NAGPA/P2RX7/CORO1A	8	Module4
GO:1900015	regulation of cytokine production involved in inflammatory response	8/608	67/18866	0.00135914	0.00982096	0.00726257	CLEC7A/ADCY7/PLD3/SIRPA/GPSM3/ALOX5/PYCARD/GBP5	8	Module4
GO:0010466	negative regulation of peptidase activity	19/608	272/18866	0.00137638	0.00993002	0.00734322	NOL3/GPX1/CSTB/COL6A3/TIMP1/SERPINA1/RPS6KA1/ARRB2/MMP9/TIMP4/CR1/RENBP/CRYAB/ECM1/SERPINB9/PLAUR/SERPINE2/TRIAP1/PAPLN	19	Module4
GO:0043434	response to peptide hormone	27/608	447/18866	0.00140594	0.0101276	0.00748932	ADCY7/AGTRAP/PTPRE/EDN1/ATP6V0B/ATP6V0C/ATP6V1B2/TIMP1/CSK/PRKCD/LYN/ICAM1/ROCK2/EPM2AIP1/CYBA/ACTN2/CYBB/MYO5A/TLR2/PTPN2/TIMP4/ATP6AP1/ATP6V0D1/MYO1C/ZNF106/SNX5/PID1	27	Module4
GO:0030282	bone mineralization	11/608	117/18866	0.00140825	0.0101285	0.00748998	GPNMB/SRGN/ALOX5/CCR1/P2RX7/IBSP/FGR/ECM1/BMPR1B/BMP2K/SNX10	11	Module4
GO:0006672	ceramide metabolic process	10/608	100/18866	0.00143846	0.0103297	0.00763881	ST8SIA4/NAGA/ASAH1/PSAP/HEXB/PRKCD/P2RX7/GM2A/GLA/CLN8	10	Module4
GO:0042092	type 2 immune response	6/608	39/18866	0.00144091	0.0103313	0.00764	CD74/IL4R/CD86/IL18/NLRP3/ECM1	6	Module4
GO:0006643	membrane lipid metabolic process	16/608	212/18866	0.00145767	0.0104354	0.00771692	ST8SIA4/NAGA/ASAH1/CTSA/PSAP/PPT1/HEXB/PRKCD/VAPB/FUCA1/MGST2/P2RX7/GM2A/GLA/CLN8/GBGT1	16	Module4
GO:0009311	oligosaccharide metabolic process	7/608	53/18866	0.00148482	0.0106134	0.00784855	ST8SIA4/NAGA/HEXB/MAN2B1/FBP1/GM2A/GLA	7	Module4
GO:0007254	JNK cascade	16/608	213/18866	0.00153039	0.0109223	0.00807699	MDFIC/EDN1/SDCBP/TRIB1/SIRPA/PTGER4/ADORA2B/CCR7/TNFRSF11A/SYK/RIPK2/FCGR2B/NCF1/DUSP10/PYCARD/MTURN	16	Module4
GO:0097696	receptor signaling pathway via STAT	14/608	174/18866	0.00155269	0.0110644	0.00818209	CCL5/PTPRC/AKR1B1/LYN/HCLS1/CSF1R/NMI/IL10RA/PTPN2/IL7R/IL18/IL10RB/CD300A/PARP14	14	Module4
GO:1901222	regulation of NIK/NF-kappaB signaling	11/608	119/18866	0.00161551	0.0114944	0.0085001	HAVCR2/EDN1/NFKBIA/CD14/LGALS9/TLR2/CD86/IL18/NLRP3/CHI3L1/TREM2	11	Module4
GO:1901568	fatty acid derivative metabolic process	14/608	175/18866	0.00163914	0.0116447	0.00861122	EDN1/CD74/GPX1/PPT1/FABP5/ABCC1/MGST2/ALOX5AP/ALOX5/TLR2/PTGS1/SYK/TBXAS1/DPEP2	14	Module4
GO:0043154	negative regulation of cysteine-type endopeptidase activity involved in apoptotic process	9/608	85/18866	0.00164697	0.0116824	0.0086391	NOL3/GPX1/RPS6KA1/ARRB2/MMP9/CRYAB/SERPINB9/PLAUR/TRIAP1	9	Module4
GO:0051017	actin filament bundle assembly	13/608	157/18866	0.00174492	0.0123583	0.00913894	NRP1/ARHGEF10L/FSCN1/MARCKS/ROCK2/PLEK/PTGER4/PFN2/WAS/AIF1/LCP1/GPR65/SHANK3	13	Module4
GO:1901570	fatty acid derivative biosynthetic process	10/608	103/18866	0.0017994	0.0127247	0.00940988	EDN1/CD74/PPT1/FABP5/MGST2/ALOX5AP/ALOX5/PTGS1/SYK/TBXAS1	10	Module4
GO:0002534	cytokine production involved in inflammatory response	8/608	70/18866	0.00180851	0.0127253	0.00941029	CLEC7A/ADCY7/PLD3/SIRPA/GPSM3/ALOX5/PYCARD/GBP5	8	Module4
GO:0002335	mature B cell differentiation	5/608	28/18866	0.00181648	0.0127253	0.00941029	CMTM7/MFNG/GPR183/FCGR2B/SLAMF8	5	Module4
GO:0090383	phagosome acidification	5/608	28/18866	0.00181648	0.0127253	0.00941029	ATP6V0B/ATP6V0C/ATP6V1B2/ATP6V0D1/SLAMF8	5	Module4
GO:0033631	cell-cell adhesion mediated by integrin	4/608	17/18866	0.00181868	0.0127253	0.00941029	CCL5/DPP4/ITGA4/FERMT3	4	Module4
GO:0044764	multi-organism cellular process	4/608	17/18866	0.00181868	0.0127253	0.00941029	CTSL/CD4/CXCR4/SIGLEC1	4	Module4
GO:0046851	negative regulation of bone remodeling	4/608	17/18866	0.00181868	0.0127253	0.00941029	INPP5D/CSK/GPR137B/P2RX7	4	Module4
GO:0097067	cellular response to thyroid hormone stimulus	4/608	17/18866	0.00181868	0.0127253	0.00941029	CTSB/CTSL/CTSH/CTSS	4	Module4
GO:0051258	protein polymerization	20/608	300/18866	0.00182282	0.012735	0.00941751	SCIN/CAPG/ARPC1B/PRKCD/ICAM1/HCLS1/IQGAP2/TUBG2/PFN2/WAS/CCR7/AIF1/HCK/ARPC3/CORO1A/NCKAP1L/MYO1C/TMSB10/PYCARD/ARHGAP18	20	Module4
GO:0010951	negative regulation of endopeptidase activity	18/608	258/18866	0.00184364	0.0128611	0.00951078	NOL3/GPX1/CSTB/COL6A3/TIMP1/SERPINA1/RPS6KA1/ARRB2/MMP9/TIMP4/CR1/RENBP/CRYAB/SERPINB9/PLAUR/SERPINE2/TRIAP1/PAPLN	18	Module4
GO:0002720	positive regulation of cytokine production involved in immune response	7/608	55/18866	0.00184955	0.0128637	0.00951264	FCER1G/CD74/B2M/SASH3/IL18/NLRP3/LILRB1	7	Module4
GO:0050819	negative regulation of coagulation	7/608	55/18866	0.00184955	0.0128637	0.00951264	PDGFRA/EDN1/PRKCD/APOE/PLAUR/SERPINE2/ADTRP	7	Module4
GO:0038083	peptidyl-tyrosine autophosphorylation	6/608	41/18866	0.00188072	0.0130609	0.00965849	LYN/SLA/SYK/HCK/FGR/ITK	6	Module4
GO:0002367	cytokine production involved in immune response	10/608	104/18866	0.0019348	0.0133839	0.00989732	FCER1G/SLC11A1/CD74/B2M/SASH3/TLR2/BTK/IL18/NLRP3/LILRB1	10	Module4
GO:0007200	phospholipase C-activating G protein-coupled receptor signaling pathway	10/608	104/18866	0.0019348	0.0133839	0.00989732	EDN1/PLCE1/CX3CR1/ACTN2/FPR1/GNA15/C3AR1/GPR65/FPR3/C5AR1	10	Module4
GO:0051453	regulation of intracellular pH	9/608	87/18866	0.00193877	0.0133839	0.00989732	SLC11A1/ATP6V0B/GRN/ATP6V0C/PPT1/ATP6V1B2/ATP6V0D1/DMXL2/SLAMF8	9	Module4
GO:0055072	iron ion homeostasis	9/608	87/18866	0.00193877	0.0133839	0.00989732	SLC11A1/FTH1/B2M/STEAP1/ATP6AP1/SLC39A8/ATP6V0D1/FTL/SLC22A17	9	Module4
GO:0055067	monovalent inorganic cation homeostasis	13/608	159/18866	0.00195376	0.0134673	0.00995904	SLC11A1/EDN1/ATP6V0B/GRN/ATP6V0C/PPT1/ATP6V1B2/ATP1A2/ATP6AP1/ATP6V0D1/DMXL2/SNX5/SLAMF8	13	Module4
GO:0007163	establishment or maintenance of cell polarity	16/608	220/18866	0.00212981	0.0145821	0.0107835	DOCK2/PARVA/MAP4/FSCN1/ROCK2/CYTH1/RHOG/CCL4/PARVB/RHOH/CCR7/RAC2/NCKAP1L/FRMD4B/PARVG/DOCK8	16	Module4
GO:0048246	macrophage chemotaxis	6/608	42/18866	0.0021354	0.0145821	0.0107835	CCL5/LGALS3/CSF1R/C3AR1/SLAMF8/C5AR1	6	Module4
GO:1901658	glycosyl compound catabolic process	6/608	42/18866	0.0021354	0.0145821	0.0107835	NAGA/FUCA1/UPP1/TYMP/GLA/FUCA2	6	Module4
GO:0001782	B cell homeostasis	5/608	29/18866	0.0021375	0.0145821	0.0107835	BCL2L11/CD74/LYN/NCKAP1L/TNFSF13B	5	Module4
GO:0032373	positive regulation of sterol transport	5/608	29/18866	0.0021375	0.0145821	0.0107835	ABCA1/NFKBIA/PLTP/APOE/ABCG1	5	Module4
GO:0032376	positive regulation of cholesterol transport	5/608	29/18866	0.0021375	0.0145821	0.0107835	ABCA1/NFKBIA/PLTP/APOE/ABCG1	5	Module4
GO:0043032	positive regulation of macrophage activation	5/608	29/18866	0.0021375	0.0145821	0.0107835	HAVCR2/CTSC/IL4R/CEBPA/TREM2	5	Module4
GO:0046425	regulation of receptor signaling pathway via JAK-STAT	12/608	142/18866	0.00217991	0.0148475	0.0109797	CCL5/PTPRC/AKR1B1/LYN/HCLS1/CSF1R/IL10RA/PTPN2/IL18/IL10RB/CD300A/PARP14	12	Module4
GO:0061572	actin filament bundle organization	13/608	161/18866	0.00218279	0.0148475	0.0109797	NRP1/ARHGEF10L/FSCN1/MARCKS/ROCK2/PLEK/PTGER4/PFN2/WAS/AIF1/LCP1/GPR65/SHANK3	13	Module4
GO:0034446	substrate adhesion-dependent cell spreading	10/608	106/18866	0.00223025	0.0151481	0.011202	NRP1/PARVA/RREB1/PARVB/ITGA4/EFNA5/LPXN/FERMT3/PARVG/RCC2	10	Module4
GO:0006677	glycosylceramide metabolic process	4/608	18/18866	0.00227925	0.0153684	0.0113649	NAGA/PSAP/PRKCD/GLA	4	Module4
GO:0033194	response to hydroperoxide	4/608	18/18866	0.00227925	0.0153684	0.0113649	GPX1/PRKCD/DAPK1/AIF1	4	Module4
GO:0034375	high-density lipoprotein particle remodeling	4/608	18/18866	0.00227925	0.0153684	0.0113649	PLTP/APOE/APOC1/ABCG1	4	Module4
GO:0043031	negative regulation of macrophage activation	4/608	18/18866	0.00227925	0.0153684	0.0113649	PTPRC/GRN/VSIG4/FCGR2B	4	Module4
GO:0043652	engulfment of apoptotic cell	4/608	18/18866	0.00227925	0.0153684	0.0113649	RHOG/RHOH/RAC2/TREM2	4	Module4
GO:0035296	regulation of tube diameter	12/608	143/18866	0.00231183	0.0155429	0.0114939	FOXC1/DOCK4/EDN1/GPX1/ACTA2/ICAM1/ROCK2/ATP1A2/APOE/ADORA2B/ADRA2C/PTAFR	12	Module4
GO:0097746	regulation of blood vessel diameter	12/608	143/18866	0.00231183	0.0155429	0.0114939	FOXC1/DOCK4/EDN1/GPX1/ACTA2/ICAM1/ROCK2/ATP1A2/APOE/ADORA2B/ADRA2C/PTAFR	12	Module4
GO:0043406	positive regulation of MAP kinase activity	18/608	264/18866	0.00236909	0.0159048	0.0117615	PTPRC/MDFIC/EDN1/PLCE1/CD74/CSK/MAPKAPK3/FPR1/ADORA2B/PIK3CG/TNFRSF11A/P2RX7/SYK/FGFR1/CXCR4/RIPK2/C5AR1/PIK3R5	18	Module4
GO:0008637	apoptotic mitochondrial changes	11/608	125/18866	0.00239138	0.0160313	0.0118551	BCL2L11/NOL3/GPX1/HK2/ARRB2/TFDP2/MMP9/PLAUR/TRIAP1/PYCARD/AIFM2	11	Module4
GO:0150077	regulation of neuroinflammatory response	6/608	43/18866	0.00241525	0.0161679	0.0119561	PTPRC/GRN/CTSC/MMP9/IL18/TREM2	6	Module4
GO:0006665	sphingolipid metabolic process	13/608	163/18866	0.00243346	0.0162663	0.0120289	ST8SIA4/NAGA/ASAH1/CTSA/PSAP/PPT1/HEXB/PRKCD/VAPB/P2RX7/GM2A/GLA/CLN8	13	Module4
GO:0051403	stress-activated MAPK cascade	19/608	286/18866	0.00243704	0.0162668	0.0120293	MDFIC/EDN1/SDCBP/TRIB1/SIRPA/LGALS9/PTGER4/ADORA2B/CCR7/TNFRSF11A/SYK/CRYAB/RIPK2/MAPK13/FCGR2B/NCF1/DUSP10/PYCARD/MTURN	19	Module4
GO:0035150	regulation of tube size	12/608	144/18866	0.00245021	0.0163312	0.0120769	FOXC1/DOCK4/EDN1/GPX1/ACTA2/ICAM1/ROCK2/ATP1A2/APOE/ADORA2B/ADRA2C/PTAFR	12	Module4
GO:0120032	regulation of plasma membrane bounded cell projection assembly	14/608	183/18866	0.00248575	0.0164837	0.0121896	NRP1/PLCE1/MAP4/FSCN1/PRKCD/ICAM1/RHOG/PFN2/WAS/CCR7/P2RX7/RAC2/PLEK2/RCC2	14	Module4
GO:0071375	cellular response to peptide hormone stimulus	21/608	330/18866	0.00249049	0.0164837	0.0121896	ADCY7/AGTRAP/PTPRE/EDN1/ATP6V0B/ATP6V0C/ATP6V1B2/CSK/PRKCD/LYN/ROCK2/CYBA/ACTN2/MYO5A/PTPN2/ATP6AP1/ATP6V0D1/MYO1C/ZNF106/SNX5/PID1	21	Module4
GO:0001516	prostaglandin biosynthetic process	5/608	30/18866	0.00249796	0.0164837	0.0121896	EDN1/CD74/FABP5/PTGS1/TBXAS1	5	Module4
GO:0010758	regulation of macrophage chemotaxis	5/608	30/18866	0.00249796	0.0164837	0.0121896	CCL5/CSF1R/C3AR1/SLAMF8/C5AR1	5	Module4
GO:0046457	prostanoid biosynthetic process	5/608	30/18866	0.00249796	0.0164837	0.0121896	EDN1/CD74/FABP5/PTGS1/TBXAS1	5	Module4
GO:0070168	negative regulation of biomineral tissue development	5/608	30/18866	0.00249796	0.0164837	0.0121896	SRGN/ROCK2/CCR1/ECM1/HEY2	5	Module4
GO:0110150	negative regulation of biomineralization	5/608	30/18866	0.00249796	0.0164837	0.0121896	SRGN/ROCK2/CCR1/ECM1/HEY2	5	Module4
GO:0007259	receptor signaling pathway via JAK-STAT	13/608	164/18866	0.00256737	0.0169177	0.0125106	CCL5/PTPRC/AKR1B1/LYN/HCLS1/CSF1R/NMI/IL10RA/PTPN2/IL18/IL10RB/CD300A/PARP14	13	Module4
GO:0008202	steroid metabolic process	21/608	332/18866	0.00267511	0.0176026	0.0130171	PDGFRA/ASAH1/SPP1/ABCA1/NPC2/LGMN/AKR1B1/LIPA/LSS/APOE/SULT1A1/CYP27A1/CEBPA/APOC1/ABCG1/ACADL/SULT1A2/FGFR1/OSBPL3/CLN8/HSD3B7	21	Module4
GO:0097178	ruffle assembly	6/608	44/18866	0.00272179	0.0178591	0.0132067	ICAM1/RHOG/PFN2/AIF1/SNX10/RCC2	6	Module4
GO:0120009	intermembrane lipid transfer	6/608	44/18866	0.00272179	0.0178591	0.0132067	ABCA1/NPC2/PLTP/APOE/ABCG1/TRIAP1	6	Module4
GO:0018958	phenol-containing compound metabolic process	10/608	109/18866	0.00274041	0.0179558	0.0132783	ITGB2/PNKD/CTSB/AKR1B1/CTSK/SULT1A1/MYO5A/ITGAM/SULT1A2/SLC16A10	10	Module4
GO:0060491	regulation of cell projection assembly	14/608	185/18866	0.00274595	0.0179668	0.0132864	NRP1/PLCE1/MAP4/FSCN1/PRKCD/ICAM1/RHOG/PFN2/WAS/CCR7/P2RX7/RAC2/PLEK2/RCC2	14	Module4
GO:0006636	unsaturated fatty acid biosynthetic process	7/608	59/18866	0.0027842	0.0181827	0.013446	EDN1/CD74/FABP5/ALOX5AP/ALOX5/PTGS1/TBXAS1	7	Module4
GO:0086001	cardiac muscle cell action potential	8/608	75/18866	0.00281001	0.0181827	0.013446	CACNB2/CXADR/ANK2/ATP1A2/DSC2/KCNJ5/GPD1L/KCNE3	8	Module4
GO:0002710	negative regulation of T cell mediated immunity	4/608	19/18866	0.00281422	0.0181827	0.013446	PTPRC/IL7R/LILRB1/FCGR2B	4	Module4
GO:0010544	negative regulation of platelet activation	4/608	19/18866	0.00281422	0.0181827	0.013446	PDGFRA/PRKCD/APOE/SERPINE2	4	Module4
GO:0010759	positive regulation of macrophage chemotaxis	4/608	19/18866	0.00281422	0.0181827	0.013446	CCL5/CSF1R/C3AR1/C5AR1	4	Module4
GO:0045780	positive regulation of bone resorption	4/608	19/18866	0.00281422	0.0181827	0.013446	SPP1/TNFRSF11A/SYK/ATP6AP1	4	Module4
GO:0046852	positive regulation of bone remodeling	4/608	19/18866	0.00281422	0.0181827	0.013446	SPP1/TNFRSF11A/SYK/ATP6AP1	4	Module4
GO:0071800	podosome assembly	4/608	19/18866	0.00281422	0.0181827	0.013446	FSCN1/HCK/LCP1/BIN2	4	Module4
GO:0098543	detection of other organism	4/608	19/18866	0.00281422	0.0181827	0.013446	NLRC4/CLEC7A/TLR2/TLR1	4	Module4
GO:2001242	regulation of intrinsic apoptotic signaling pathway	13/608	166/18866	0.00285331	0.0184096	0.0136139	BCL2L11/VNN1/NOL3/CD74/GPX1/TMBIM6/MMP9/PTPN2/PLAUR/STYXL1/TRIAP1/PYCARD/ZNF385A	13	Module4
GO:0002675	positive regulation of acute inflammatory response	5/608	31/18866	0.00290055	0.0186367	0.0137818	FCER1G/BTK/CCR7/PIK3CG/TNFRSF11A	5	Module4
GO:0034368	protein-lipid complex remodeling	5/608	31/18866	0.00290055	0.0186367	0.0137818	PLTP/APOE/APOC1/ABCG1/PLA2G7	5	Module4
GO:0034369	plasma lipoprotein particle remodeling	5/608	31/18866	0.00290055	0.0186367	0.0137818	PLTP/APOE/APOC1/ABCG1/PLA2G7	5	Module4
GO:0008217	regulation of blood pressure	14/608	187/18866	0.00302813	0.0194295	0.014368	AGTRAP/EDN1/ACTA2/SGK1/ANPEP/CYBA/ATP1A2/SLC2A5/PTGS1/CPA3/PTAFR/RENBP/CTSZ/SNX5	14	Module4
GO:0034105	positive regulation of tissue remodeling	6/608	45/18866	0.00305657	0.0195452	0.0144536	SPP1/ROCK2/IL18/TNFRSF11A/SYK/ATP6AP1	6	Module4
GO:0052372	modulation by symbiont of entry into host	6/608	45/18866	0.00305657	0.0195452	0.0144536	CD74/TRIM14/LGALS9/CD4/TRIM22/FUCA2	6	Module4
GO:1901657	glycosyl compound metabolic process	11/608	129/18866	0.00305882	0.0195452	0.0144536	NAGA/AKR1B1/AKR1A1/FUCA1/MPP1/UPP1/IMPDH1/TYMP/AMPD3/GLA/FUCA2	11	Module4
GO:0030865	cortical cytoskeleton organization	7/608	60/18866	0.00306619	0.0195531	0.0144595	FMNL1/ROCK2/RHOG/PLEK/RHOH/RAC2/NCKAP1L	7	Module4
GO:2000117	negative regulation of cysteine-type endopeptidase activity	9/608	93/18866	0.00306847	0.0195531	0.0144595	NOL3/GPX1/RPS6KA1/ARRB2/MMP9/CRYAB/SERPINB9/PLAUR/TRIAP1	9	Module4
GO:0045766	positive regulation of angiogenesis	15/608	208/18866	0.00313191	0.0199299	0.0147381	ITGB2/BTG1/NRP1/ITGAX/CX3CR1/GRN/CTSH/HK2/CYBB/CXCR4/ECM1/CHI3L1/C3AR1/RRAS/C5AR1	15	Module4
GO:0031589	cell-substrate adhesion	22/608	359/18866	0.00315272	0.0200349	0.0148157	BCL2L11/ITGAL/ITGB2/NRP1/PARVA/ROCK2/RREB1/ACTN2/MMP12/PARVB/ITGA4/CCR7/EFNA5/RAC2/TMEM8B/CORO1A/RRAS/LPXN/SIGLEC1/FERMT3/PARVG/RCC2	22	Module4
GO:0009612	response to mechanical stimulus	15/608	209/18866	0.0032769	0.0207955	0.0153782	EDN1/NFKBIA/CYBA/ATP1A2/MMP7/PTGER4/CASP1/P2RX7/CXCR4/CHI3L1/HABP4/TLR5/SERPINE2/TLR8/SHANK3	15	Module4
GO:0007160	cell-matrix adhesion	16/608	230/18866	0.00331588	0.0209517	0.0154937	BCL2L11/ITGAL/ITGB2/NRP1/ROCK2/ACTN2/MMP12/ITGA4/CCR7/EFNA5/TMEM8B/RRAS/SIGLEC1/FERMT3/PARVG/RCC2	16	Module4
GO:0038095	Fc-epsilon receptor signaling pathway	13/608	169/18866	0.00333053	0.0209517	0.0154937	FCER1G/PSME1/LYN/PSMB10/PSMB9/LCP2/BTK/VAV1/SYK/PSMB8/ITK/LAT2/VAV3	13	Module4
GO:0010743	regulation of macrophage derived foam cell differentiation	5/608	32/18866	0.003348	0.0209517	0.0154937	ABCA1/NFKBIA/ABCG1/IL18/MSR1	5	Module4
GO:0034367	protein-containing complex remodeling	5/608	32/18866	0.003348	0.0209517	0.0154937	PLTP/APOE/APOC1/ABCG1/PLA2G7	5	Module4
GO:0001865	NK T cell differentiation	3/608	10/18866	0.00337378	0.0209517	0.0154937	PSAP/ITK/PRDM1	3	Module4
GO:0032308	positive regulation of prostaglandin secretion	3/608	10/18866	0.00337378	0.0209517	0.0154937	EDN1/TNFRSF11A/P2RX7	3	Module4
GO:0034135	regulation of toll-like receptor 2 signaling pathway	3/608	10/18866	0.00337378	0.0209517	0.0154937	LYN/CYBA/TLR1	3	Module4
GO:0044351	macropinocytosis	3/608	10/18866	0.00337378	0.0209517	0.0154937	DOCK2/MAPKAPK3/PYCARD	3	Module4
GO:0045625	regulation of T-helper 1 cell differentiation	3/608	10/18866	0.00337378	0.0209517	0.0154937	CD80/IL4R/RIPK2	3	Module4
GO:0045988	negative regulation of striated muscle contraction	3/608	10/18866	0.00337378	0.0209517	0.0154937	ATP1A2/PIK3CG/KCNE3	3	Module4
GO:0046598	positive regulation of viral entry into host cell	3/608	10/18866	0.00337378	0.0209517	0.0154937	CD74/LGALS9/CD4	3	Module4
GO:0060600	dichotomous subdivision of an epithelial terminal unit	3/608	10/18866	0.00337378	0.0209517	0.0154937	NRP1/PLXND1/CTSH	3	Module4
GO:0070099	regulation of chemokine-mediated signaling pathway	3/608	10/18866	0.00337378	0.0209517	0.0154937	CCL5/EDN1/TREM2	3	Module4
GO:0075294	positive regulation by symbiont of entry into host	3/608	10/18866	0.00337378	0.0209517	0.0154937	CD74/LGALS9/CD4	3	Module4
GO:1900426	positive regulation of defense response to bacterium	3/608	10/18866	0.00337378	0.0209517	0.0154937	HAVCR2/GRN/CYBA	3	Module4
GO:2000271	positive regulation of fibroblast apoptotic process	3/608	10/18866	0.00337378	0.0209517	0.0154937	BCL2L11/BTG1/STK17B	3	Module4
GO:0002726	positive regulation of T cell cytokine production	4/608	20/18866	0.00342914	0.0210978	0.0156018	B2M/SASH3/IL18/NLRP3	4	Module4
GO:0002827	positive regulation of T-helper 1 type immune response	4/608	20/18866	0.00342914	0.0210978	0.0156018	CD80/SLC11A1/IL18/RIPK2	4	Module4
GO:0007252	I-kappaB phosphorylation	4/608	20/18866	0.00342914	0.0210978	0.0156018	CX3CR1/PRDX4/SIRPA/TLR2	4	Module4
GO:0032303	regulation of icosanoid secretion	4/608	20/18866	0.00342914	0.0210978	0.0156018	EDN1/TNFRSF11A/P2RX7/SYK	4	Module4
GO:0042089	cytokine biosynthetic process	4/608	20/18866	0.00342914	0.0210978	0.0156018	CD80/IL18/CD28/SYK	4	Module4
GO:0045019	negative regulation of nitric oxide biosynthetic process	4/608	20/18866	0.00342914	0.0210978	0.0156018	ROCK2/SIRPA/ACP5/GLA	4	Module4
GO:1904406	negative regulation of nitric oxide metabolic process	4/608	20/18866	0.00342914	0.0210978	0.0156018	ROCK2/SIRPA/ACP5/GLA	4	Module4
GO:0006766	vitamin metabolic process	11/608	131/18866	0.00344461	0.0211649	0.0156514	VNN1/MCCC2/LGMN/AKR1A1/PLTP/ABCC1/CYP27A1/TCN2/ACP5/FOLR2/FGFR1	11	Module4
GO:0006066	alcohol metabolic process	23/608	385/18866	0.00352357	0.0216215	0.015989	IDH1/ASAH1/PLCE1/INPP5D/ABCA1/NPC2/TPI1/AKR1B1/AKR1A1/LSS/APOE/PLEK/SULT1A1/CYP27A1/CEBPA/APOC1/ABCG1/ACADL/PTAFR/SULT1A2/GK/FGFR1/CLN8	23	Module4
GO:0070167	regulation of biomineral tissue development	9/608	95/18866	0.00354277	0.0216534	0.0160126	SRGN/ROCK2/ALOX5/CCR1/P2RX7/ECM1/BMPR1B/BMP2K/HEY2	9	Module4
GO:0110149	regulation of biomineralization	9/608	95/18866	0.00354277	0.0216534	0.0160126	SRGN/ROCK2/ALOX5/CCR1/P2RX7/ECM1/BMPR1B/BMP2K/HEY2	9	Module4
GO:1903725	regulation of phospholipid metabolic process	9/608	95/18866	0.00354277	0.0216534	0.0160126	PDGFRA/IDH1/PRKCD/LYN/APOC1/CCR7/FGR/VAV3/PIK3R5	9	Module4
GO:0002223	stimulatory C-type lectin receptor signaling pathway	10/608	113/18866	0.00356129	0.0216809	0.016033	FCER1G/CD209/PSME1/PRKCD/LYN/PSMB10/PSMB9/SYK/PSMB8/CLEC4E	10	Module4
GO:0032963	collagen metabolic process	10/608	113/18866	0.00356129	0.0216809	0.016033	CTSD/CTSB/CTSL/CTSK/CTSS/ARRB2/MMP9/MMP7/MMP12/P2RX7	10	Module4
GO:0035821	modulation of process of other organism	10/608	113/18866	0.00356129	0.0216809	0.016033	CCL5/BCL2L11/CD209/VAPB/CSF1R/APOE/CD4/CCL4/SERPINB9/MPEG1	10	Module4
GO:0050871	positive regulation of B cell activation	12/608	151/18866	0.00361918	0.0220044	0.0162722	PTPRC/CD74/INPP5D/SASH3/GPR183/BTK/CD28/SYK/NCKAP1L/TNFSF13/VAV3/TNFSF13B	12	Module4
GO:0050808	synapse organization	25/608	433/18866	0.00375486	0.0227995	0.0168601	SRGN/CACNB2/NRP2/NFIA/NRP1/PLXND1/CX3CR1/LGMN/C1QB/APOE/MYO5A/IL10RA/TLR2/PFN2/PTPRD/ITGAM/EFNA5/LILRB2/FCGR2B/C1QA/TREM2/C5AR1/C1QC/IGSF21/SHANK3	25	Module4
GO:0032411	positive regulation of transporter activity	10/608	114/18866	0.00379424	0.0230085	0.0170147	CACNB2/SGK1/PRKCD/CTSS/ANK2/ACTN2/PTAFR/TREM2/KCNE3/SHANK3	10	Module4
GO:1903169	regulation of calcium ion transmembrane transport	12/608	152/18866	0.00381778	0.023121	0.0170979	CEMIP/CACNB2/LYN/ANK2/CYBA/ATP1A2/MYO5A/PIK3CG/PTPN6/CORO1A/KCNE3/SESTD1	12	Module4
GO:0035590	purinergic nucleotide receptor signaling pathway	5/608	33/18866	0.00384299	0.0232131	0.017166	ADORA2B/PTAFR/P2RX7/P2RY13/GPR34	5	Module4
GO:0043552	positive regulation of phosphatidylinositol 3-kinase activity	5/608	33/18866	0.00384299	0.0232131	0.017166	PDGFRA/LYN/CCR7/FGR/VAV3	5	Module4
GO:0002244	hematopoietic progenitor cell differentiation	13/608	172/18866	0.00387071	0.0233501	0.0172673	PTPRC/FOXC1/PDGFRA/PSME1/PSMB10/CSF1R/KCNAB2/PLEK/PSMB9/PTPRZ1/PTPN6/PSMB8/RBM47	13	Module4
GO:0071260	cellular response to mechanical stimulus	8/608	79/18866	0.00388605	0.0234122	0.0173132	CYBA/ATP1A2/MMP7/PTGER4/CASP1/HABP4/TLR5/TLR8	8	Module4
GO:0006979	response to oxidative stress	26/608	458/18866	0.00394695	0.0237483	0.0175618	PDGFRA/IDH1/VNN1/NOL3/EDN1/GPX1/PSAP/PRDX4/PRKCD/SIRPA/CYBA/DAPK1/APOE/CYBB/MMP9/ALOX5/PTGS1/NCF4/BTK/CCR7/AIF1/CRYAB/NCF2/MAPK13/NCF1/AIFM2	26	Module4
GO:1901214	regulation of neuron death	20/608	321/18866	0.00395356	0.0237572	0.0175684	CCL5/BCL2L11/GPNMB/ITGB2/NRP1/CX3CR1/GRN/PPT1/LGMN/APOE/ARRB2/TYROBP/PTPRZ1/KMO/ITGAM/CORO1A/CTSZ/FCGR2B/C1QA/C5AR1	20	Module4
GO:0030449	regulation of complement activation	10/608	115/18866	0.00403909	0.0242398	0.0179253	C2/CFI/C1QB/VSIG4/CR1/C3AR1/C1R/C1QA/C5AR1/C1QC	10	Module4
GO:0033209	tumor necrosis factor-mediated signaling pathway	13/608	173/18866	0.00406576	0.0243683	0.0180203	PSME1/NFKBIA/PSMB10/PSMB9/PTPN2/CASP1/TNFRSF11A/TNFSF8/SYK/PSMB8/TNFSF13/PYCARD/TNFSF13B	13	Module4
GO:1901216	positive regulation of neuron death	9/608	97/18866	0.00407279	0.0243718	0.0180229	BCL2L11/ITGB2/GRN/TYROBP/KMO/ITGAM/CTSZ/FCGR2B/C1QA	9	Module4
GO:0043280	positive regulation of cysteine-type endopeptidase activity involved in apoptotic process	11/608	134/18866	0.00409542	0.0243718	0.0180229	NLRC4/BCL2L11/CLEC7A/CTSD/CTSH/DAPK1/LGALS9/CASP1/NLRP3/SYK/PYCARD	11	Module4
GO:0046394	carboxylic acid biosynthetic process	22/608	367/18866	0.0040963	0.0243718	0.0180229	CEMIP/EDN1/CD74/PHGDH/AKR1A1/FABP5/CYP27A1/MGST2/ALOX5AP/KYNU/APOC1/ALOX5/MYO5A/PTGS1/KMO/ACADL/SYK/TBXAS1/OSBPL3/BCAT1/ADI1/HSD3B7	22	Module4
GO:0019370	leukotriene biosynthetic process	4/608	21/18866	0.00412939	0.0243718	0.0180229	MGST2/ALOX5AP/ALOX5/SYK	4	Module4
GO:0032616	interleukin-13 production	4/608	21/18866	0.00412939	0.0243718	0.0180229	LGALS9/IL18/NLRP3/TNFRSF21	4	Module4
GO:0033630	positive regulation of cell adhesion mediated by integrin	4/608	21/18866	0.00412939	0.0243718	0.0180229	CCL5/PTPN6/SYK/NCKAP1L	4	Module4
GO:0042107	cytokine metabolic process	4/608	21/18866	0.00412939	0.0243718	0.0180229	CD80/IL18/CD28/SYK	4	Module4
GO:0090201	negative regulation of release of cytochrome c from mitochondria	4/608	21/18866	0.00412939	0.0243718	0.0180229	NOL3/GPX1/ARRB2/TRIAP1	4	Module4
GO:0090330	regulation of platelet aggregation	4/608	21/18866	0.00412939	0.0243718	0.0180229	PRKCD/LYN/SYK/SERPINE2	4	Module4
GO:0099515	actin filament-based transport	4/608	21/18866	0.00412939	0.0243718	0.0180229	MYO5A/SUN2/MYO1F/MYO1C	4	Module4
GO:1903978	regulation of microglial cell activation	4/608	21/18866	0.00412939	0.0243718	0.0180229	PTPRC/GRN/CTSC/TREM2	4	Module4
GO:2000269	regulation of fibroblast apoptotic process	4/608	21/18866	0.00412939	0.0243718	0.0180229	BCL2L11/BTG1/STK17B/PIK3CG	4	Module4
GO:0071902	positive regulation of protein serine/threonine kinase activity	21/608	345/18866	0.00417792	0.0246269	0.0182115	PTPRC/CEMIP/MDFIC/EDN1/PLCE1/CD74/CSK/MAPKAPK3/CSF1R/CKS2/FPR1/ADORA2B/PIK3CG/TNFRSF11A/P2RX7/SYK/FGFR1/CXCR4/RIPK2/C5AR1/PIK3R5	21	Module4
GO:0016053	organic acid biosynthetic process	22/608	368/18866	0.0042293	0.0248981	0.0184121	CEMIP/EDN1/CD74/PHGDH/AKR1A1/FABP5/CYP27A1/MGST2/ALOX5AP/KYNU/APOC1/ALOX5/MYO5A/PTGS1/KMO/ACADL/SYK/TBXAS1/OSBPL3/BCAT1/ADI1/HSD3B7	22	Module4
GO:0032648	regulation of interferon-beta production	6/608	48/18866	0.00424603	0.0249333	0.0184381	SIRPA/TLR2/LILRB1/RIPK2/TLR8/PYCARD	6	Module4
GO:1900271	regulation of long-term synaptic potentiation	6/608	48/18866	0.00424603	0.0249333	0.0184381	CX3CR1/LGMN/APOE/TYROBP/LILRB2/SHANK3	6	Module4
GO:2001243	negative regulation of intrinsic apoptotic signaling pathway	9/608	98/18866	0.00436002	0.0255703	0.0189092	VNN1/NOL3/CD74/GPX1/TMBIM6/MMP9/PLAUR/TRIAP1/ZNF385A	9	Module4
GO:0045861	negative regulation of proteolysis	22/608	369/18866	0.00436588	0.0255723	0.0189107	NOL3/GPX1/SDCBP/CSTB/COL6A3/TIMP1/SERPINA1/RPS6KA1/ARRB2/MMP9/TIMP4/CR1/RENBP/CRYAB/ECM1/SERPINB9/CTSZ/PLAUR/SERPINE2/TRIAP1/CLN8/PAPLN	22	Module4
GO:0032814	regulation of natural killer cell activation	5/608	34/18866	0.00438822	0.0256385	0.0189596	HAVCR2/TYROBP/IL18/FGR/PRDM1	5	Module4
GO:0070232	regulation of T cell apoptotic process	5/608	34/18866	0.00438822	0.0256385	0.0189596	CCL5/LGALS3/LGALS9/IL7R/DOCK8	5	Module4
GO:0032507	maintenance of protein location in cell	7/608	64/18866	0.00441763	0.0257131	0.0190148	SCIN/SRGN/SP100/HK2/CD4/SUN2/TMSB10	7	Module4
GO:0033344	cholesterol efflux	7/608	64/18866	0.00441763	0.0257131	0.0190148	ABCA1/NPC2/NFKBIA/PLTP/APOE/APOC1/ABCG1	7	Module4
GO:0060135	maternal process involved in female pregnancy	7/608	64/18866	0.00441763	0.0257131	0.0190148	HAVCR2/SPP1/CTSB/AKR1B1/LGALS9/MMP7/PRDM1	7	Module4
GO:0001820	serotonin secretion	3/608	11/18866	0.00452863	0.0257914	0.0190726	FCER1G/LILRB1/SYK	3	Module4
GO:0006054	N-acetylneuraminate metabolic process	3/608	11/18866	0.00452863	0.0257914	0.0190726	RENBP/NAGK/NPL	3	Module4
GO:0032306	regulation of prostaglandin secretion	3/608	11/18866	0.00452863	0.0257914	0.0190726	EDN1/TNFRSF11A/P2RX7	3	Module4
GO:0033632	regulation of cell-cell adhesion mediated by integrin	3/608	11/18866	0.00452863	0.0257914	0.0190726	CCL5/DPP4/FERMT3	3	Module4
GO:0035747	natural killer cell chemotaxis	3/608	11/18866	0.00452863	0.0257914	0.0190726	CCL5/CCL4/PIK3CG	3	Module4
GO:0044803	multi-organism membrane organization	3/608	11/18866	0.00452863	0.0257914	0.0190726	CTSL/CD4/CXCR4	3	Module4
GO:0051712	positive regulation of killing of cells of other organism	3/608	11/18866	0.00452863	0.0257914	0.0190726	BCL2L11/CLEC7A/SYK	3	Module4
GO:0060368	regulation of Fc receptor mediated stimulatory signaling pathway	3/608	11/18866	0.00452863	0.0257914	0.0190726	PTPRC/CSK/LYN	3	Module4
GO:0070339	response to bacterial lipopeptide	3/608	11/18866	0.00452863	0.0257914	0.0190726	CD14/TLR2/TLR1	3	Module4
GO:0071220	cellular response to bacterial lipoprotein	3/608	11/18866	0.00452863	0.0257914	0.0190726	CD14/TLR2/TLR1	3	Module4
GO:0071221	cellular response to bacterial lipopeptide	3/608	11/18866	0.00452863	0.0257914	0.0190726	CD14/TLR2/TLR1	3	Module4
GO:0090269	fibroblast growth factor production	3/608	11/18866	0.00452863	0.0257914	0.0190726	ROCK2/FGFR1/AIF1	3	Module4
GO:0090270	regulation of fibroblast growth factor production	3/608	11/18866	0.00452863	0.0257914	0.0190726	ROCK2/FGFR1/AIF1	3	Module4
GO:1905245	regulation of aspartic-type peptidase activity	3/608	11/18866	0.00452863	0.0257914	0.0190726	GRN/LYN/ROCK2	3	Module4
GO:2001138	regulation of phospholipid transport	3/608	11/18866	0.00452863	0.0257914	0.0190726	PRKCD/APOE/TRIAP1	3	Module4
GO:2001140	positive regulation of phospholipid transport	3/608	11/18866	0.00452863	0.0257914	0.0190726	PRKCD/APOE/TRIAP1	3	Module4
GO:0019915	lipid storage	8/608	81/18866	0.00453114	0.0257914	0.0190726	ABCA1/NFKBIA/HEXB/APOE/ABCG1/PTPN2/MSR1/GM2A	8	Module4
GO:0051279	regulation of release of sequestered calcium ion into cytosol	8/608	81/18866	0.00453114	0.0257914	0.0190726	CEMIP/LYN/ANK2/CYBA/ATP1A2/MYO5A/PTPN6/CORO1A	8	Module4
GO:0051817	modulation of process of other organism involved in symbiotic interaction	9/608	99/18866	0.00466281	0.0264759	0.0195788	CCL5/BCL2L11/CD209/VAPB/CSF1R/APOE/CD4/CCL4/SERPINB9	9	Module4
GO:0062207	regulation of pattern recognition receptor signaling pathway	9/608	99/18866	0.00466281	0.0264759	0.0195788	CD14/LYN/CYBA/ARRB2/TLR2/LILRA2/CD300A/TLR5/TLR1	9	Module4
GO:0000187	activation of MAPK activity	12/608	156/18866	0.00470161	0.0266559	0.019712	PTPRC/MDFIC/PLCE1/CD74/MAPKAPK3/FPR1/ADORA2B/P2RX7/SYK/CXCR4/RIPK2/C5AR1	12	Module4
GO:0070231	T cell apoptotic process	6/608	49/18866	0.00470951	0.0266559	0.019712	CCL5/BCL2L11/LGALS3/LGALS9/IL7R/DOCK8	6	Module4
GO:0042180	cellular ketone metabolic process	17/608	260/18866	0.00471176	0.0266559	0.019712	PNKD/CD74/ODC1/PSME1/TPI1/AKR1B1/AKR1A1/FABP5/PSMB10/PSMB9/KYNU/APOC1/SLC7A7/KMO/ACADL/PSMB8/AIFM2	17	Module4
GO:0006940	regulation of smooth muscle contraction	7/608	65/18866	0.00481652	0.0272154	0.0201257	DOCK4/EDN1/PLCE1/ATP1A2/ADORA2B/ADRA2C/PTAFR	7	Module4
GO:0042552	myelination	11/608	137/18866	0.00484066	0.0273185	0.0202019	ITGAX/PSAP/CTSC/HEXB/ANK2/PTPRZ1/MYO5A/TYMP/TLR2/CXCR4/TNFRSF21	11	Module4
GO:0010888	negative regulation of lipid storage	4/608	22/18866	0.00492016	0.0276998	0.0204839	ABCA1/NFKBIA/ABCG1/PTPN2	4	Module4
GO:0034104	negative regulation of tissue remodeling	4/608	22/18866	0.00492016	0.0276998	0.0204839	INPP5D/CSK/GPR137B/P2RX7	4	Module4
GO:0043271	negative regulation of ion transport	12/608	157/18866	0.0049463	0.0278132	0.0205678	TMBIM6/ICAM1/ATP1A2/ACTN2/MMP9/SFRP4/LILRB1/LILRB2/KCNAB1/SERPINE2/KCNE3/SESTD1	12	Module4
GO:0045807	positive regulation of endocytosis	9/608	100/18866	0.0049817	0.0279783	0.0206899	PPT1/CD14/B2M/APOE/ARRB2/SFRP4/SYK/NCKAP1L/TREM2	9	Module4
GO:0002440	production of molecular mediator of immune response	19/608	306/18866	0.00507887	0.0284896	0.021068	PTPRC/FCER1G/SLC11A1/CD74/TMBIM6/B2M/IL4R/SASH3/TLR2/BTK/CD86/IL7R/IL18/CD28/NLRP3/LILRB1/TNFSF13/FCGR2B/TNFSF13B	19	Module4
GO:0090130	tissue migration	22/608	374/18866	0.00510507	0.028602	0.0211511	ITGB2/NRP2/NRP1/PLXND1/EDN1/GRN/GPX1/ACTA2/LGMN/CTSH/ROCK2/SP100/APOE/RREB1/DPP4/MMP9/PFN2/FGFR1/RRAS/ADTRP/DUSP10/LPXN	22	Module4
GO:0046330	positive regulation of JNK cascade	11/608	138/18866	0.00511163	0.0286041	0.0211527	MDFIC/EDN1/SDCBP/CCR7/TNFRSF11A/SYK/RIPK2/FCGR2B/NCF1/PYCARD/MTURN	11	Module4
GO:0002711	positive regulation of T cell mediated immunity	6/608	50/18866	0.00520914	0.0290099	0.0214527	PTPRC/B2M/SASH3/IL18/NLRP3/P2RX7	6	Module4
GO:0019674	NAD metabolic process	6/608	50/18866	0.00520914	0.0290099	0.0214527	TPI1/HK2/KMO/HK3/PFKM/GPD1L	6	Module4
GO:0032608	interferon-beta production	6/608	50/18866	0.00520914	0.0290099	0.0214527	SIRPA/TLR2/LILRB1/RIPK2/TLR8/PYCARD	6	Module4
GO:1903727	positive regulation of phospholipid metabolic process	6/608	50/18866	0.00520914	0.0290099	0.0214527	PDGFRA/PRKCD/LYN/CCR7/FGR/VAV3	6	Module4
GO:0002718	regulation of cytokine production involved in immune response	8/608	83/18866	0.00525546	0.029204	0.0215963	FCER1G/CD74/B2M/SASH3/BTK/IL18/NLRP3/LILRB1	8	Module4
GO:0042063	gliogenesis	19/608	307/18866	0.00525659	0.029204	0.0215963	CX3CR1/GRN/PHGDH/HEXB/CSK/LYN/CSF1R/PTPRZ1/TLR2/GPR183/CXCR4/SUN2/SERPINE2/TNFRSF21/DUSP10/C1QA/TREM2/C5AR1/NRROS	19	Module4
GO:0002792	negative regulation of peptide secretion	9/608	101/18866	0.00531726	0.0295057	0.0218194	SRGN/CD74/TMBIM6/APOE/PTGER4/FCGR2B/ADTRP/RHBDF2/RAB11FIP1	9	Module4
GO:0007272	ensheathment of neurons	11/608	139/18866	0.00539445	0.0298626	0.0220833	ITGAX/PSAP/CTSC/HEXB/ANK2/PTPRZ1/MYO5A/TYMP/TLR2/CXCR4/TNFRSF21	11	Module4
GO:0008366	axon ensheathment	11/608	139/18866	0.00539445	0.0298626	0.0220833	ITGAX/PSAP/CTSC/HEXB/ANK2/PTPRZ1/MYO5A/TYMP/TLR2/CXCR4/TNFRSF21	11	Module4
GO:0043368	positive T cell selection	5/608	36/18866	0.00564006	0.031185	0.0230612	PTPRC/DOCK2/CD74/CTSL/PTPN2	5	Module4
GO:0071827	plasma lipoprotein particle organization	6/608	51/18866	0.00574653	0.0317359	0.0234686	ABCA1/PLTP/APOE/APOC1/ABCG1/PLA2G7	6	Module4
GO:0032693	negative regulation of interleukin-10 production	4/608	23/18866	0.00580645	0.0318348	0.0235417	TYROBP/LILRB1/FCGR2B/TNFRSF21	4	Module4
GO:0045649	regulation of macrophage differentiation	4/608	23/18866	0.00580645	0.0318348	0.0235417	TRIB1/HCLS1/PTPN2/C1QC	4	Module4
GO:0050860	negative regulation of T cell receptor signaling pathway	4/608	23/18866	0.00580645	0.0318348	0.0235417	LGALS3/LILRB4/PTPN2/PTPN6	4	Module4
GO:0071404	cellular response to low-density lipoprotein particle stimulus	4/608	23/18866	0.00580645	0.0318348	0.0235417	FCER1G/ITGB2/ABCA1/SYK	4	Module4
GO:0034599	cellular response to oxidative stress	19/608	310/18866	0.00582065	0.0318348	0.0235417	PDGFRA/VNN1/NOL3/GPX1/PSAP/PRKCD/SIRPA/CYBA/DAPK1/CYBB/MMP9/ALOX5/NCF4/BTK/AIF1/NCF2/MAPK13/NCF1/AIFM2	19	Module4
GO:0001768	establishment of T cell polarity	3/608	12/18866	0.00589482	0.0318348	0.0235417	DOCK2/CCR7/DOCK8	3	Module4
GO:0002713	negative regulation of B cell mediated immunity	3/608	12/18866	0.00589482	0.0318348	0.0235417	CR1/PTPN6/FCGR2B	3	Module4
GO:0002890	negative regulation of immunoglobulin mediated immune response	3/608	12/18866	0.00589482	0.0318348	0.0235417	CR1/PTPN6/FCGR2B	3	Module4
GO:0032490	detection of molecule of bacterial origin	3/608	12/18866	0.00589482	0.0318348	0.0235417	TLR2/TLR1/TREM2	3	Module4
GO:0032905	transforming growth factor beta1 production	3/608	12/18866	0.00589482	0.0318348	0.0235417	LUM/TYROBP/NRROS	3	Module4
GO:0033004	negative regulation of mast cell activation	3/608	12/18866	0.00589482	0.0318348	0.0235417	LGALS9/CD84/CD300A	3	Module4
GO:0036005	response to macrophage colony-stimulating factor	3/608	12/18866	0.00589482	0.0318348	0.0235417	CSF1R/TLR2/PTPN2	3	Module4
GO:0036006	cellular response to macrophage colony-stimulating factor stimulus	3/608	12/18866	0.00589482	0.0318348	0.0235417	CSF1R/TLR2/PTPN2	3	Module4
GO:0038110	interleukin-2-mediated signaling pathway	3/608	12/18866	0.00589482	0.0318348	0.0235417	IL2RG/PTPN2/SYK	3	Module4
GO:0042340	keratan sulfate catabolic process	3/608	12/18866	0.00589482	0.0318348	0.0235417	LUM/HEXB/GALNS	3	Module4
GO:0042492	gamma-delta T cell differentiation	3/608	12/18866	0.00589482	0.0318348	0.0235417	PTPRC/SYK/NCKAP1L	3	Module4
GO:0071639	positive regulation of monocyte chemotactic protein-1 production	3/608	12/18866	0.00589482	0.0318348	0.0235417	CLEC7A/LGALS9/SYK	3	Module4
GO:1902287	semaphorin-plexin signaling pathway involved in axon guidance	3/608	12/18866	0.00589482	0.0318348	0.0235417	NRP1/PLXND1/PLXNC1	3	Module4
GO:2001204	regulation of osteoclast development	3/608	12/18866	0.00589482	0.0318348	0.0235417	TYROBP/LILRB1/ATP6AP1	3	Module4
GO:0008361	regulation of cell size	13/608	181/18866	0.00592878	0.031981	0.0236498	NRP1/EDN1/SPP1/APOE/PLEK/KCNN4/IL7R/VAV1/P2RX7/EFNA5/VAV3/DEPTOR/SHANK3	13	Module4
GO:0016485	protein processing	15/608	223/18866	0.00595371	0.0320781	0.0237217	NLRC4/SRGN/NOL3/LGMN/CTSL/CTSH/CTSS/CPA3/CASP1/P2RX7/RIPK2/CTSZ/C1R/SERPINE2/PYCARD	15	Module4
GO:0030101	natural killer cell activation	8/608	85/18866	0.00606502	0.0326399	0.0241371	PTPRC/HAVCR2/ITGB2/TYROBP/IL18/FGR/CORO1A/PRDM1	8	Module4
GO:0002637	regulation of immunoglobulin production	7/608	68/18866	0.00617656	0.0331633	0.0245241	PTPRC/TMBIM6/IL4R/SASH3/CD28/TNFSF13/FCGR2B	7	Module4
GO:0034381	plasma lipoprotein particle clearance	7/608	68/18866	0.00617656	0.0331633	0.0245241	NPC2/LIPA/AP2S1/CSK/APOE/APOC1/MSR1	7	Module4
GO:1902652	secondary alcohol metabolic process	12/608	162/18866	0.00632633	0.0339086	0.0250753	IDH1/ABCA1/NPC2/LSS/APOE/CYP27A1/CEBPA/APOC1/ABCG1/ACADL/FGFR1/CLN8	12	Module4
GO:0015850	organic hydroxy compound transport	17/608	268/18866	0.00633992	0.0339086	0.0250753	FCER1G/SPP1/ABCA1/NPC2/NFKBIA/PLTP/APOE/SLCO2B1/APOC1/ABCG1/AQP9/ADRA2C/LILRB1/SYK/MSR1/OSBPL3/EMB	17	Module4
GO:0033673	negative regulation of kinase activity	17/608	268/18866	0.00633992	0.0339086	0.0250753	PTPRC/TRIB1/CSK/PRKCD/LYN/HEXIM1/GPRC5A/APOE/CEBPA/PTPN2/RHOH/PTPN6/CD300A/DUSP10/DEPTOR/PYCARD/PKIB	17	Module4
GO:0090218	positive regulation of lipid kinase activity	5/608	37/18866	0.00635192	0.0339086	0.0250753	PDGFRA/LYN/CCR7/FGR/VAV3	5	Module4
GO:1904994	regulation of leukocyte adhesion to vascular endothelial cell	5/608	37/18866	0.00635192	0.0339086	0.0250753	ITGB2/ICAM1/ALOX5/ITGA4/PTAFR	5	Module4
GO:0044282	small molecule catabolic process	25/608	452/18866	0.0064276	0.0342446	0.0253237	CEMIP/PNKD/MCCC2/TPI1/AKR1A1/HEXB/HK2/UPP1/APOE/SULT1A1/CYP27A1/KYNU/TYMP/KMO/HK3/ACADL/RENBP/SULT1A2/GK/PFKM/BCAT1/ADTRP/NAGK/NPL/ADHFE1	25	Module4
GO:0032231	regulation of actin filament bundle assembly	9/608	104/18866	0.00642962	0.0342446	0.0253237	NRP1/ARHGEF10L/ROCK2/PLEK/PTGER4/PFN2/WAS/GPR65/SHANK3	9	Module4
GO:0070252	actin-mediated cell contraction	10/608	123/18866	0.0064774	0.0344595	0.0254827	CACNB2/PARVA/ANK2/ATP1A2/ACTN2/DSC2/KCNJ5/GPD1L/TPM3/KCNE3	10	Module4
GO:2001235	positive regulation of apoptotic signaling pathway	13/608	183/18866	0.0064873	0.0344726	0.0254924	PTPRC/BCL2L11/CTSC/CTSH/PRKCD/LGALS9/TFDP2/MMP9/PTPN2/BMPR1B/PLAUR/STYXL1/PYCARD	13	Module4
GO:0032409	regulation of transporter activity	18/608	291/18866	0.00652829	0.0346507	0.0256241	CACNB2/SGK1/PRKCD/CTSS/ANK2/DAPK1/ATP1A2/ACTN2/MMP9/MYO5A/PTAFR/KCNAB1/GPD1L/FXYD5/NETO2/TREM2/KCNE3/SHANK3	18	Module4
GO:0008286	insulin receptor signaling pathway	11/608	143/18866	0.00665143	0.035264	0.0260776	PTPRE/ATP6V0B/ATP6V0C/ATP6V1B2/PRKCD/PTPN2/ATP6AP1/ATP6V0D1/ZNF106/SNX5/PID1	11	Module4
GO:0044706	multi-multicellular organism process	15/608	226/18866	0.00671015	0.0355303	0.0262746	HAVCR2/ARHGDIB/EDN1/SPP1/CTSB/AKR1B1/TIMP1/HEXB/LGALS9/MMP9/MMP7/ADRA2C/PTAFR/SERPINE2/PRDM1	15	Module4
GO:0062197	cellular response to chemical stress	21/608	360/18866	0.00672464	0.0355303	0.0262746	PDGFRA/VNN1/NOL3/GPX1/PSAP/AKR1B1/PRKCD/SIRPA/CYBA/DAPK1/CYBB/MMP9/ALOX5/NCF4/BTK/AIF1/NCF2/MAPK13/NCF1/AIFM2/RCSD1	21	Module4
GO:0070997	neuron death	21/608	360/18866	0.00672464	0.0355303	0.0262746	CCL5/BCL2L11/GPNMB/ITGB2/NRP1/CX3CR1/GRN/PPT1/LGMN/APOE/ARRB2/TYROBP/PTPRZ1/KMO/ITGAM/CORO1A/CTSZ/FCGR2B/TNFRSF21/C1QA/C5AR1	21	Module4
GO:0046328	regulation of JNK cascade	13/608	184/18866	0.00678182	0.0356076	0.0263317	MDFIC/EDN1/SDCBP/SIRPA/CCR7/TNFRSF11A/SYK/RIPK2/FCGR2B/NCF1/DUSP10/PYCARD/MTURN	13	Module4
GO:0034035	purine ribonucleoside bisphosphate metabolic process	4/608	24/18866	0.00679301	0.0356076	0.0263317	PAPSS2/SULT1A1/TPST2/SULT1A2	4	Module4
GO:0034123	positive regulation of toll-like receptor signaling pathway	4/608	24/18866	0.00679301	0.0356076	0.0263317	CYBA/TLR2/TLR5/TLR1	4	Module4
GO:0044346	fibroblast apoptotic process	4/608	24/18866	0.00679301	0.0356076	0.0263317	BCL2L11/BTG1/STK17B/PIK3CG	4	Module4
GO:0050427	3'-phosphoadenosine 5'-phosphosulfate metabolic process	4/608	24/18866	0.00679301	0.0356076	0.0263317	PAPSS2/SULT1A1/TPST2/SULT1A2	4	Module4
GO:1902993	positive regulation of amyloid precursor protein catabolic process	4/608	24/18866	0.00679301	0.0356076	0.0263317	LYN/ROCK2/ABCG1/GSAP	4	Module4
GO:1903306	negative regulation of regulated secretory pathway	4/608	24/18866	0.00679301	0.0356076	0.0263317	LGALS9/CD84/CD300A/FCGR2B	4	Module4
GO:0051091	positive regulation of DNA-binding transcription factor activity	17/608	270/18866	0.00681116	0.0356625	0.0263723	NLRC4/ITGB2/EDN1/CX3CR1/ICAM1/HCLS1/TRIM14/LGALS9/TLR2/BTK/IL18/TNFRSF11A/NLRP3/RIPK2/TRIM22/PYCARD/LPAR5	17	Module4
GO:0045010	actin nucleation	6/608	53/18866	0.00694094	0.036301	0.0268445	SCIN/ARPC1B/IQGAP2/WAS/ARPC3/CORO1A	6	Module4
GO:0051604	protein maturation	18/608	293/18866	0.00698945	0.0365136	0.0270017	NLRC4/SRGN/NOL3/LGMN/PRDX4/CTSL/CTSH/CTSS/CPA3/CASP1/P2RX7/RIPK2/CTSZ/C1R/SERPINE2/TSPAN14/PYCARD/ISCA2	18	Module4
GO:0051656	establishment of organelle localization	24/608	432/18866	0.00710637	0.036928	0.0273082	FCER1G/MAP4/CTSC/VAMP8/LYN/SERPINA1/IL4R/LGALS9/MYO5A/BTK/ITGA4/ADORA2B/CD84/PIK3CG/RAC2/SYK/ATP6AP1/FGR/CD300A/CTSZ/LAT2/SUN2/MYO1F/MYO1C	24	Module4
GO:0010742	macrophage derived foam cell differentiation	5/608	38/18866	0.00712451	0.036928	0.0273082	ABCA1/NFKBIA/ABCG1/IL18/MSR1	5	Module4
GO:0043029	T cell homeostasis	5/608	38/18866	0.00712451	0.036928	0.0273082	BCL2L11/LGALS9/P2RX7/CORO1A/NCKAP1L	5	Module4
GO:0044003	modulation by symbiont of host process	5/608	38/18866	0.00712451	0.036928	0.0273082	BCL2L11/CD209/VAPB/CD4/SERPINB9	5	Module4
GO:0046596	regulation of viral entry into host cell	5/608	38/18866	0.00712451	0.036928	0.0273082	CD74/TRIM14/LGALS9/CD4/TRIM22	5	Module4
GO:0086005	ventricular cardiac muscle cell action potential	5/608	38/18866	0.00712451	0.036928	0.0273082	ANK2/DSC2/KCNJ5/GPD1L/KCNE3	5	Module4
GO:0090077	foam cell differentiation	5/608	38/18866	0.00712451	0.036928	0.0273082	ABCA1/NFKBIA/ABCG1/IL18/MSR1	5	Module4
GO:0006936	muscle contraction	21/608	362/18866	0.0071443	0.0369893	0.0273535	CACNB2/DOCK4/EDN1/PLCE1/ACTA2/ROCK2/ANK2/ATP1A2/ACTN2/DSC2/ADORA2B/ADRA2C/PTAFR/PIK3CG/KCNJ5/CXCR4/CRYAB/GPD1L/TPM3/KCNE3/RCSD1	21	Module4
GO:0006879	cellular iron ion homeostasis	7/608	70/18866	0.00723008	0.0373822	0.027644	SLC11A1/FTH1/ATP6AP1/SLC39A8/ATP6V0D1/FTL/SLC22A17	7	Module4
GO:0032479	regulation of type I interferon production	10/608	125/18866	0.00723631	0.0373822	0.027644	HAVCR2/CD14/SIRPA/NMI/TLR2/LILRB1/SYK/RIPK2/TLR8/PYCARD	10	Module4
GO:0001767	establishment of lymphocyte polarity	3/608	13/18866	0.00748164	0.0383083	0.0283289	DOCK2/CCR7/DOCK8	3	Module4
GO:0009313	oligosaccharide catabolic process	3/608	13/18866	0.00748164	0.0383083	0.0283289	HEXB/MAN2B1/GM2A	3	Module4
GO:0010745	negative regulation of macrophage derived foam cell differentiation	3/608	13/18866	0.00748164	0.0383083	0.0283289	ABCA1/NFKBIA/ABCG1	3	Module4
GO:0032493	response to bacterial lipoprotein	3/608	13/18866	0.00748164	0.0383083	0.0283289	CD14/TLR2/TLR1	3	Module4
GO:0032725	positive regulation of granulocyte macrophage colony-stimulating factor production	3/608	13/18866	0.00748164	0.0383083	0.0283289	CD80/IL18/SYK	3	Module4
GO:0035641	locomotory exploration behavior	3/608	13/18866	0.00748164	0.0383083	0.0283289	ATP1A2/APOE/DPP4	3	Module4
GO:0071352	cellular response to interleukin-2	3/608	13/18866	0.00748164	0.0383083	0.0283289	IL2RG/PTPN2/SYK	3	Module4
GO:1900272	negative regulation of long-term synaptic potentiation	3/608	13/18866	0.00748164	0.0383083	0.0283289	CX3CR1/APOE/TYROBP	3	Module4
GO:0006584	catecholamine metabolic process	6/608	54/18866	0.00760113	0.0388344	0.0287179	ITGB2/PNKD/AKR1B1/SULT1A1/ITGAM/SULT1A2	6	Module4
GO:0009712	catechol-containing compound metabolic process	6/608	54/18866	0.00760113	0.0388344	0.0287179	ITGB2/PNKD/AKR1B1/SULT1A1/ITGAM/SULT1A2	6	Module4
GO:0048524	positive regulation of viral process	9/608	107/18866	0.00771265	0.0393608	0.0291072	CCL5/MDFIC/CD74/VAPB/CSF1R/LGALS9/APOE/CD4/CD28	9	Module4
GO:0010631	epithelial cell migration	21/608	365/18866	0.00781369	0.0398326	0.0294561	ITGB2/NRP2/NRP1/PLXND1/EDN1/GRN/GPX1/LGMN/CTSH/ROCK2/SP100/APOE/RREB1/DPP4/MMP9/PFN2/FGFR1/RRAS/ADTRP/DUSP10/LPXN	21	Module4
GO:0097191	extrinsic apoptotic signaling pathway	15/608	230/18866	0.00783669	0.039906	0.0295104	PTPRC/BCL2L11/LGALS3/NOL3/NRP1/GPX1/ICAM1/SP100/DAPK1/BCL2A1/P2RX7/FGFR1/BMPR1B/DEPTOR/PYCARD	15	Module4
GO:0042326	negative regulation of phosphorylation	26/608	484/18866	0.00794501	0.0404026	0.0298776	PTPRC/SAMSN1/TRIB1/CSK/PRKCD/LYN/HEXIM1/SIRPA/GPRC5A/APOE/ARRB2/CEBPA/PTPN2/RHOH/PTPN6/P2RX7/FBP1/CD300A/GPD1L/DUSP10/DEPTOR/PID1/PYCARD/PKIB/PARP14/RNF149	26	Module4
GO:0032691	negative regulation of interleukin-1 beta production	5/608	39/18866	0.00796033	0.0404026	0.0298776	CX3CR1/ARRB2/ACP5/NLRP3/TREM2	5	Module4
GO:0086091	regulation of heart rate by cardiac conduction	5/608	39/18866	0.00796033	0.0404026	0.0298776	CACNB2/ANK2/DSC2/KCNJ5/KCNE3	5	Module4
GO:0032606	type I interferon production	10/608	127/18866	0.00806219	0.0408749	0.0302268	HAVCR2/CD14/SIRPA/NMI/TLR2/LILRB1/SYK/RIPK2/TLR8/PYCARD	10	Module4
GO:0043903	regulation of symbiotic process	15/608	231/18866	0.00814064	0.0412276	0.0304877	CCL5/BCL2L11/MDFIC/CD74/VAPB/CSF1R/TRIM14/LGALS9/APOE/CD4/CCL4/CD28/CXCR4/TRIM22/FUCA2	15	Module4
GO:0002931	response to ischemia	6/608	55/18866	0.00830541	0.0418791	0.0309695	CX3CR1/ROCK2/HK2/CSF1R/P2RX7/TREM2	6	Module4
GO:0046164	alcohol catabolic process	6/608	55/18866	0.00830541	0.0418791	0.0309695	TPI1/APOE/SULT1A1/CYP27A1/SULT1A2/GK	6	Module4
GO:0070741	response to interleukin-6	6/608	55/18866	0.00830541	0.0418791	0.0309695	ICAM1/CEBPA/PTPN2/CHI3L1/SELPLG/PID1	6	Module4
GO:0071825	protein-lipid complex subunit organization	6/608	55/18866	0.00830541	0.0418791	0.0309695	ABCA1/PLTP/APOE/APOC1/ABCG1/PLA2G7	6	Module4
GO:0014013	regulation of gliogenesis	10/608	128/18866	0.00850141	0.0428209	0.0316659	CX3CR1/LYN/PTPRZ1/TLR2/GPR183/CXCR4/SERPINE2/TNFRSF21/DUSP10/TREM2	10	Module4
GO:0031644	regulation of nervous system process	11/608	148/18866	0.00853275	0.0428883	0.0317158	ITGAX/EDN1/CTSC/FABP5/ROCK2/TYMP/ADRA2C/PTAFR/NPTXR/TNFRSF21/SHANK3	11	Module4
GO:0090132	epithelium migration	21/608	368/18866	0.00853329	0.0428883	0.0317158	ITGB2/NRP2/NRP1/PLXND1/EDN1/GRN/GPX1/LGMN/CTSH/ROCK2/SP100/APOE/RREB1/DPP4/MMP9/PFN2/FGFR1/RRAS/ADTRP/DUSP10/LPXN	21	Module4
GO:0006939	smooth muscle contraction	9/608	109/18866	0.00867064	0.0435315	0.0321914	DOCK4/EDN1/PLCE1/ACTA2/ROCK2/ATP1A2/ADORA2B/ADRA2C/PTAFR	9	Module4
GO:0003018	vascular process in circulatory system	13/608	190/18866	0.00877877	0.0440267	0.0325576	FOXC1/DOCK4/EDN1/GPX1/ACTA2/FABP5/ICAM1/ROCK2/ATP1A2/APOE/ADORA2B/ADRA2C/PTAFR	13	Module4
GO:0002714	positive regulation of B cell mediated immunity	5/608	40/18866	0.00886185	0.0442044	0.032689	PTPRC/FCER1G/BTK/CD28/TNFSF13	5	Module4
GO:0002891	positive regulation of immunoglobulin mediated immune response	5/608	40/18866	0.00886185	0.0442044	0.032689	PTPRC/FCER1G/BTK/CD28/TNFSF13	5	Module4
GO:0046636	negative regulation of alpha-beta T cell activation	5/608	40/18866	0.00886185	0.0442044	0.032689	IL4R/LGALS9/RUNX3/LILRB1/CD300A	5	Module4
GO:0048713	regulation of oligodendrocyte differentiation	5/608	40/18866	0.00886185	0.0442044	0.032689	PTPRZ1/TLR2/CXCR4/TNFRSF21/DUSP10	5	Module4
GO:1902991	regulation of amyloid precursor protein catabolic process	5/608	40/18866	0.00886185	0.0442044	0.032689	LYN/ROCK2/APOE/ABCG1/GSAP	5	Module4
GO:0086002	cardiac muscle cell action potential involved in contraction	6/608	56/18866	0.00905532	0.0450726	0.033331	CACNB2/ANK2/DSC2/KCNJ5/GPD1L/KCNE3	6	Module4
GO:0086065	cell communication involved in cardiac conduction	6/608	56/18866	0.00905532	0.0450726	0.033331	CACNB2/CXADR/ANK2/ATP1A2/DSC2/KCNJ5	6	Module4
GO:0002507	tolerance induction	4/608	26/18866	0.00908477	0.0450741	0.0333321	HAVCR2/LYN/LGALS9/LILRB2	4	Module4
GO:0031664	regulation of lipopolysaccharide-mediated signaling pathway	4/608	26/18866	0.00908477	0.0450741	0.0333321	TRIB1/LY86/CD180/LILRA2	4	Module4
GO:0042832	defense response to protozoan	4/608	26/18866	0.00908477	0.0450741	0.0333321	CLEC7A/SLC11A1/IL4R/IRF8	4	Module4
GO:0010821	regulation of mitochondrion organization	13/608	191/18866	0.00915232	0.0453607	0.0335441	BCL2L11/NOL3/GPX1/HK2/ARRB2/TFDP2/MMP9/RAC2/PLAUR/TRIAP1/PID1/TREM2/PYCARD	13	Module4
GO:0031346	positive regulation of cell projection organization	22/608	394/18866	0.00917263	0.0454128	0.0335826	CNTN1/NRP1/PLXND1/PLCE1/GRN/FSCN1/LYN/APOE/RREB1/PTPRD/CCR7/PLXNC1/P2RX7/EFNA5/RAC2/FGFR1/CXCR4/SS18L2/STYXL1/PLEK2/SHANK3/MAP6	22	Module4
GO:0010872	regulation of cholesterol esterification	3/608	14/18866	0.0092968	0.0456863	0.0337849	APOE/APOC1/ABCG1	3	Module4
GO:0032310	prostaglandin secretion	3/608	14/18866	0.0092968	0.0456863	0.0337849	EDN1/TNFRSF11A/P2RX7	3	Module4
GO:0032688	negative regulation of interferon-beta production	3/608	14/18866	0.0092968	0.0456863	0.0337849	SIRPA/LILRB1/PYCARD	3	Module4
GO:0035589	G protein-coupled purinergic nucleotide receptor signaling pathway	3/608	14/18866	0.0092968	0.0456863	0.0337849	PTAFR/P2RY13/GPR34	3	Module4
GO:0038166	angiotensin-activated signaling pathway	3/608	14/18866	0.0092968	0.0456863	0.0337849	AGTRAP/ROCK2/ACTN2	3	Module4
GO:0070669	response to interleukin-2	3/608	14/18866	0.0092968	0.0456863	0.0337849	IL2RG/PTPN2/SYK	3	Module4
GO:1901678	iron coordination entity transport	3/608	14/18866	0.0092968	0.0456863	0.0337849	FLVCR2/SLC48A1/SLC22A17	3	Module4
GO:0050890	cognition	18/608	302/18866	0.00940234	0.0461561	0.0341323	CX3CR1/PPT1/LGMN/SGK1/B2M/ATP1A2/APOE/PTPRZ1/TLR2/LILRB2/KCNAB1/HLA-DRA/MAN2B1/GM2A/NTAN1/C5AR1/ZNF385A/SHANK3	18	Module4
GO:1904018	positive regulation of vasculature development	15/608	235/18866	0.00945156	0.0463486	0.0342746	ITGB2/BTG1/NRP1/ITGAX/CX3CR1/GRN/CTSH/HK2/CYBB/CXCR4/ECM1/CHI3L1/C3AR1/RRAS/C5AR1	15	Module4
GO:0086003	cardiac muscle cell contraction	7/608	74/18866	0.00972807	0.0476039	0.0352029	CACNB2/ANK2/ATP1A2/DSC2/KCNJ5/GPD1L/KCNE3	7	Module4
GO:2001259	positive regulation of cation channel activity	7/608	74/18866	0.00972807	0.0476039	0.0352029	CACNB2/CTSS/ANK2/ACTN2/TREM2/KCNE3/SHANK3	7	Module4
GO:0043523	regulation of neuron apoptotic process	14/608	214/18866	0.00974377	0.0476305	0.0352226	BCL2L11/NRP1/CX3CR1/GRN/PPT1/LGMN/APOE/ARRB2/TYROBP/PTPRZ1/ITGAM/CORO1A/CTSZ/C5AR1	14	Module4
GO:0001933	negative regulation of protein phosphorylation	24/608	444/18866	0.00977672	0.0477413	0.0353045	PTPRC/SAMSN1/TRIB1/CSK/PRKCD/LYN/HEXIM1/SIRPA/GPRC5A/APOE/ARRB2/CEBPA/PTPN2/PTPN6/P2RX7/CD300A/GPD1L/DUSP10/DEPTOR/PID1/PYCARD/PKIB/PARP14/RNF149	24	Module4
GO:2000008	regulation of protein localization to cell surface	5/608	41/18866	0.00983145	0.047958	0.0354648	FCER1G/KCNAB2/ACTN2/TYROBP/GPD1L	5	Module4
GO:0051224	negative regulation of protein transport	11/608	151/18866	0.00984485	0.0479729	0.0354758	SRGN/MDFIC/TMBIM6/CSK/SP100/APOE/PTGER4/FCGR2B/ADTRP/RHBDF2/RAB11FIP1	11	Module4
GO:0050714	positive regulation of protein secretion	12/608	172/18866	0.00998867	0.0485717	0.0359186	CD14/KCNN4/ABCG1/PTGER4/TLR2/P2RX7/SYK/FGR/CADM1/TREM2/CLEC4E/CLEC5A	12	Module4
GO:0070304	positive regulation of stress-activated protein kinase signaling cascade	12/608	172/18866	0.00998867	0.0485717	0.0359186	MDFIC/EDN1/SDCBP/LYN/CCR7/TNFRSF11A/SYK/RIPK2/FCGR2B/NCF1/PYCARD/MTURN	12	Module4
GO:0042113	B cell activation	15/67	328/18866	4.45487e-13	6.04971e-10	4.93318e-10	CD79A/BANK1/CR2/CD38/CD27/IL7/BLNK/IGLC1/IGHM/MS4A1/TRBC1/IGKC/IGHD/IGLL5/MZB1	15	Module11
GO:0050853	B cell receptor signaling pathway	11/67	135/18866	1.52263e-12	1.03386e-09	8.43054e-10	CD79A/LCK/CD38/BLNK/IGLC1/IGHM/MS4A1/TRBC1/IGKC/IGHD/IGLL5	11	Module11
GO:0002429	immune response-activating cell surface receptor signaling pathway	16/67	481/18866	8.46312e-12	2.87323e-09	2.34295e-09	CD79A/LCK/ICAM3/CR2/CD38/BLNK/IGLC1/IGHM/TRAC/HLA-DRB4/MS4A1/TRBC1/IGKC/IGHD/IGLV1-44/IGLL5	16	Module11
GO:0002757	immune response-activating signal transduction	16/67	481/18866	8.46312e-12	2.87323e-09	2.34295e-09	CD79A/LCK/ICAM3/CR2/CD38/BLNK/IGLC1/IGHM/TRAC/HLA-DRB4/MS4A1/TRBC1/IGKC/IGHD/IGLV1-44/IGLL5	16	Module11
GO:0051251	positive regulation of lymphocyte activation	14/67	357/18866	2.31478e-11	6.28694e-09	5.12663e-09	LCK/CD38/CD27/IL7/CCR2/MDK/IGLC1/TNFRSF14/IGHM/CCL19/TRBC1/IGKC/IGHD/IGLL5	14	Module11
GO:0030098	lymphocyte differentiation	14/67	368/18866	3.46498e-11	7.22338e-09	5.89023e-09	CD79A/LCK/CR2/CD27/IL7/CCR2/BLNK/MDK/CCL19/GPR18/MS4A1/LY9/BCL11B/EOMES	14	Module11
GO:0002460	adaptive immune response based on somatic recombination of immune receptors built from immunoglobulin superfamily domains	14/67	370/18866	3.72339e-11	7.22338e-09	5.89023e-09	CLEC4G/CXCL13/CR2/CD27/CCR2/IGLC1/IGHM/CCL19/LY9/TRBC1/IGKC/IGHD/IGLV1-44/IGLL5	14	Module11
GO:0050864	regulation of B cell activation	11/67	195/18866	8.41199e-11	1.42794e-08	1.1644e-08	BANK1/CD38/CD27/IL7/IGLC1/IGHM/TRBC1/IGKC/IGHD/IGLL5/MZB1	11	Module11
GO:0050851	antigen receptor-mediated signaling pathway	13/67	325/18866	1.01939e-10	1.53815e-08	1.25427e-08	CD79A/LCK/CD38/BLNK/IGLC1/IGHM/TRAC/HLA-DRB4/MS4A1/TRBC1/IGKC/IGHD/IGLL5	13	Module11
GO:0002696	positive regulation of leukocyte activation	14/67	406/18866	1.26917e-10	1.72354e-08	1.40544e-08	LCK/CD38/CD27/IL7/CCR2/MDK/IGLC1/TNFRSF14/IGHM/CCL19/TRBC1/IGKC/IGHD/IGLL5	14	Module11
GO:0050867	positive regulation of cell activation	14/67	421/18866	2.04305e-10	2.52223e-08	2.05673e-08	LCK/CD38/CD27/IL7/CCR2/MDK/IGLC1/TNFRSF14/IGHM/CCL19/TRBC1/IGKC/IGHD/IGLL5	14	Module11
GO:0006959	humoral immune response	13/67	377/18866	6.31195e-10	7.14303e-08	5.82471e-08	CXCL13/CR2/IL7/CCR2/BLNK/IGLC1/IGHM/MS4A1/TRBC1/IGKC/IGHD/IGLV1-44/IGLL5	13	Module11
GO:0050871	positive regulation of B cell activation	9/67	151/18866	3.05345e-09	3.18969e-07	2.601e-07	CD38/CD27/IL7/IGLC1/IGHM/TRBC1/IGKC/IGHD/IGLL5	9	Module11
GO:0046651	lymphocyte proliferation	11/67	283/18866	4.35087e-09	4.22034e-07	3.44144e-07	CD79A/CLEC4G/IMPDH2/CR2/CD38/IL7/CCR2/TNFRSF14/CCL19/MS4A1/MZB1	11	Module11
GO:0032943	mononuclear cell proliferation	11/67	286/18866	4.85601e-09	4.3963e-07	3.58493e-07	CD79A/CLEC4G/IMPDH2/CR2/CD38/IL7/CCR2/TNFRSF14/CCL19/MS4A1/MZB1	11	Module11
GO:0002449	lymphocyte mediated immunity	12/67	366/18866	5.45745e-09	4.63201e-07	3.77713e-07	CLEC4G/CR2/CD27/CCR2/IGLC1/IGHM/TRBC1/IGKC/IGHD/IGLV1-44/IGLL5/SLAMF7	12	Module11
GO:0070661	leukocyte proliferation	11/67	313/18866	1.23705e-08	9.88181e-07	8.05803e-07	CD79A/CLEC4G/IMPDH2/CR2/CD38/IL7/CCR2/TNFRSF14/CCL19/MS4A1/MZB1	11	Module11
GO:0030217	T cell differentiation	10/67	253/18866	1.99695e-08	1.50658e-06	1.22853e-06	LCK/CD27/IL7/CCR2/MDK/CCL19/GPR18/LY9/BCL11B/EOMES	10	Module11
GO:0006958	complement activation classical pathway	8/67	141/18866	3.58562e-08	2.56277e-06	2.08979e-06	CR2/IGLC1/IGHM/TRBC1/IGKC/IGHD/IGLV1-44/IGLL5	8	Module11
GO:0002455	humoral immune response mediated by circulating immunoglobulin	8/67	155/18866	7.49151e-08	5.08673e-06	4.14793e-06	CR2/IGLC1/IGHM/TRBC1/IGKC/IGHD/IGLV1-44/IGLL5	8	Module11
GO:0016064	immunoglobulin mediated immune response	9/67	227/18866	1.05249e-07	6.80607e-06	5.54995e-06	CR2/CD27/IGLC1/IGHM/TRBC1/IGKC/IGHD/IGLV1-44/IGLL5	9	Module11
GO:0042110	T cell activation	12/67	483/18866	1.15635e-07	6.95026e-06	5.66752e-06	CLEC4G/LCK/CD27/IL7/CCR2/MDK/TNFRSF14/CCL19/GPR18/LY9/BCL11B/EOMES	12	Module11
GO:0019724	B cell mediated immunity	9/67	230/18866	1.17714e-07	6.95026e-06	5.66752e-06	CR2/CD27/IGLC1/IGHM/TRBC1/IGKC/IGHD/IGLV1-44/IGLL5	9	Module11
GO:0006956	complement activation	8/67	178/18866	2.17702e-07	1.23183e-05	1.00448e-05	CR2/IGLC1/IGHM/TRBC1/IGKC/IGHD/IGLV1-44/IGLL5	8	Module11
GO:0006910	phagocytosis recognition	6/67	88/18866	6.88399e-07	3.73939e-05	3.04925e-05	IGLC1/IGHM/TRBC1/IGKC/IGHD/IGLL5	6	Module11
GO:0046631	alpha-beta T cell activation	7/67	146/18866	8.48831e-07	4.43351e-05	3.61526e-05	CCR2/TNFRSF14/CCL19/GPR18/LY9/BCL11B/EOMES	7	Module11
GO:0042100	B cell proliferation	6/67	97/18866	1.22431e-06	6.15781e-05	5.02133e-05	CD79A/CR2/CD38/IL7/MS4A1/MZB1	6	Module11
GO:0042742	defense response to bacterium	9/67	348/18866	3.71751e-06	0.000180299	0.000147023	CXCL13/HP/IGLC1/TNFRSF14/IGHM/TRBC1/IGKC/IGHD/IGLL5	9	Module11
GO:0006911	phagocytosis engulfment	6/67	126/18866	5.63072e-06	0.000263508	0.000214875	IGLC1/IGHM/TRBC1/IGKC/IGHD/IGLL5	6	Module11
GO:0002697	regulation of immune effector process	10/67	470/18866	5.82123e-06	0.000263508	0.000214875	CLEC4G/APOBEC3G/CR2/CCR2/IGLC1/TNFRSF14/CCL19/IGKC/IGLV1-44/MZB1	10	Module11
GO:0022409	positive regulation of cell-cell adhesion	8/67	279/18866	6.34181e-06	0.000277812	0.000226539	LCK/CXCL13/CD27/IL7/CCR2/MDK/TNFRSF14/CCL19	8	Module11
GO:0006909	phagocytosis	9/67	382/18866	7.89743e-06	0.000335147	0.000273293	ICAM3/CCR2/IGLC1/IGHM/TRBC1/IGKC/IGHD/IGLV1-44/IGLL5	9	Module11
GO:0099024	plasma membrane invagination	6/67	135/18866	8.37641e-06	0.000344702	0.000281084	IGLC1/IGHM/TRBC1/IGKC/IGHD/IGLL5	6	Module11
GO:0030183	B cell differentiation	6/67	137/18866	9.11372e-06	0.000364013	0.000296831	CD79A/CR2/CD27/IL7/BLNK/MS4A1	6	Module11
GO:0050870	positive regulation of T cell activation	7/67	214/18866	1.06974e-05	0.000415058	0.000338455	LCK/CD27/IL7/CCR2/MDK/TNFRSF14/CCL19	7	Module11
GO:0010324	membrane invagination	6/67	143/18866	1.16471e-05	0.000439354	0.000358267	IGLC1/IGHM/TRBC1/IGKC/IGHD/IGLL5	6	Module11
GO:0050670	regulation of lymphocyte proliferation	7/67	219/18866	1.24288e-05	0.00045617	0.00037198	CLEC4G/CD38/IL7/CCR2/TNFRSF14/CCL19/MZB1	7	Module11
GO:0032944	regulation of mononuclear cell proliferation	7/67	221/18866	1.31835e-05	0.000471135	0.000384183	CLEC4G/CD38/IL7/CCR2/TNFRSF14/CCL19/MZB1	7	Module11
GO:0008037	cell recognition	7/67	226/18866	1.52377e-05	0.000530586	0.000432661	IGLC1/IGHM/CCL19/TRBC1/IGKC/IGHD/IGLL5	7	Module11
GO:0007204	positive regulation of cytosolic calcium ion concentration	8/67	322/18866	1.7947e-05	0.000609301	0.000496849	LCK/CXCL13/CD38/CCR2/CCL19/GPR18/MS4A1/P2RX5	8	Module11
GO:1903039	positive regulation of leukocyte cell-cell adhesion	7/67	235/18866	1.96027e-05	0.000649281	0.00052945	LCK/CD27/IL7/CCR2/MDK/TNFRSF14/CCL19	7	Module11
GO:1903037	regulation of leukocyte cell-cell adhesion	8/67	329/18866	2.09429e-05	0.000677154	0.000552179	CLEC4G/LCK/CD27/IL7/CCR2/MDK/TNFRSF14/CCL19	8	Module11
GO:0050863	regulation of T cell activation	8/67	332/18866	2.23498e-05	0.00069269	0.000564847	CLEC4G/LCK/CD27/IL7/CCR2/MDK/TNFRSF14/CCL19	8	Module11
GO:0070663	regulation of leukocyte proliferation	7/67	240/18866	2.24436e-05	0.00069269	0.000564847	CLEC4G/CD38/IL7/CCR2/TNFRSF14/CCL19/MZB1	7	Module11
GO:0022407	regulation of cell-cell adhesion	9/67	439/18866	2.3845e-05	0.000719589	0.000586782	CLEC4G/LCK/CXCL13/CD27/IL7/CCR2/MDK/TNFRSF14/CCL19	9	Module11
GO:0046632	alpha-beta T cell differentiation	5/67	106/18866	3.72869e-05	0.0010829	0.000883044	CCL19/GPR18/LY9/BCL11B/EOMES	5	Module11
GO:0051480	regulation of cytosolic calcium ion concentration	8/67	357/18866	3.7479e-05	0.0010829	0.000883044	LCK/CXCL13/CD38/CCR2/CCL19/GPR18/MS4A1/P2RX5	8	Module11
GO:0055074	calcium ion homeostasis	9/67	468/18866	3.93093e-05	0.00111212	0.000906872	LCK/CXCL13/CD38/CCR2/CCL19/GPR18/MS4A1/P2RX5/FAM20A	9	Module11
GO:0007159	leukocyte cell-cell adhesion	8/67	364/18866	4.29956e-05	0.00119159	0.000971674	CLEC4G/LCK/CD27/IL7/CCR2/MDK/TNFRSF14/CCL19	8	Module11
GO:0002688	regulation of leukocyte chemotaxis	5/67	124/18866	7.88652e-05	0.00214198	0.00174666	CXCL13/CCR2/MDK/CCL19/GPR18	5	Module11
GO:0002685	regulation of leukocyte migration	6/67	212/18866	0.000105778	0.00281659	0.00229676	CXCL13/CCR2/MDK/TNFRSF14/CCL19/GPR18	6	Module11
GO:0002920	regulation of humoral immune response	5/67	134/18866	0.000113794	0.00297177	0.0024233	CXCL13/CR2/IGLC1/IGKC/IGLV1-44	5	Module11
GO:0045785	positive regulation of cell adhesion	8/67	428/18866	0.000132911	0.00340553	0.00277701	LCK/CXCL13/CD27/IL7/CCR2/MDK/TNFRSF14/CCL19	8	Module11
GO:0002687	positive regulation of leukocyte migration	5/67	142/18866	0.000149424	0.00375773	0.0030642	CXCL13/CCR2/MDK/TNFRSF14/CCL19	5	Module11
GO:0001819	positive regulation of cytokine production	8/67	447/18866	0.00017891	0.00434584	0.00354378	IL7/CCR2/MDK/TNFRSF14/CCL19/LY9/IGHD/TLR7	8	Module11
GO:2000406	positive regulation of T cell migration	3/67	31/18866	0.00017921	0.00434584	0.00354378	CXCL13/CCR2/TNFRSF14	3	Module11
GO:0045580	regulation of T cell differentiation	5/67	150/18866	0.000193027	0.00459879	0.00375004	CD27/IL7/CCR2/MDK/CCL19	5	Module11
GO:0006874	cellular calcium ion homeostasis	8/67	456/18866	0.000204886	0.00479716	0.0039118	LCK/CXCL13/CD38/CCR2/CCL19/GPR18/MS4A1/P2RX5	8	Module11
GO:0045582	positive regulation of T cell differentiation	4/67	92/18866	0.000320949	0.00735571	0.00599814	CD27/IL7/MDK/CCL19	4	Module11
GO:0002819	regulation of adaptive immune response	5/67	168/18866	0.00032625	0.00735571	0.00599814	CLEC4G/CD48/CCR2/TNFRSF14/CCL19	5	Module11
GO:2000403	positive regulation of lymphocyte migration	3/67	38/18866	0.000330411	0.00735571	0.00599814	CXCL13/CCR2/TNFRSF14	3	Module11
GO:0072503	cellular divalent inorganic cation homeostasis	8/67	492/18866	0.000341816	0.00748687	0.0061051	LCK/CXCL13/CD38/CCR2/CCL19/GPR18/MS4A1/P2RX5	8	Module11
GO:0002690	positive regulation of leukocyte chemotaxis	4/67	96/18866	0.000377539	0.00813807	0.00663611	CXCL13/CCR2/MDK/CCL19	4	Module11
GO:0045619	regulation of lymphocyte differentiation	5/67	181/18866	0.000459092	0.00974136	0.0079435	CD27/IL7/CCR2/MDK/CCL19	5	Module11
GO:0002695	negative regulation of leukocyte activation	5/67	184/18866	0.000494816	0.0103379	0.00842991	BANK1/CLEC4G/CCR2/MDK/TNFRSF14	5	Module11
GO:2000404	regulation of T cell migration	3/67	44/18866	0.000510893	0.010512	0.00857192	CXCL13/CCR2/TNFRSF14	3	Module11
GO:0045621	positive regulation of lymphocyte differentiation	4/67	105/18866	0.000530433	0.0107512	0.00876694	CD27/IL7/MDK/CCL19	4	Module11
GO:0002286	T cell activation involved in immune response	4/67	109/18866	0.000610797	0.012198	0.00994672	MDK/CCL19/LY9/EOMES	4	Module11
GO:0030449	regulation of complement activation	4/67	115/18866	0.00074703	0.0146299	0.0119298	CR2/IGLC1/IGKC/IGLV1-44	4	Module11
GO:0002440	production of molecular mediator of immune response	6/67	306/18866	0.000754119	0.0146299	0.0119298	CCR2/TNFRSF14/IGKC/IGLV1-44/VPREB3/MZB1	6	Module11
GO:0072676	lymphocyte migration	4/67	117/18866	0.000796857	0.0152413	0.0124284	CXCL13/CCR2/TNFRSF14/CCL19	4	Module11
GO:0050866	negative regulation of cell activation	5/67	207/18866	0.000842698	0.0158942	0.0129608	BANK1/CLEC4G/CCR2/MDK/TNFRSF14	5	Module11
GO:0045579	positive regulation of B cell differentiation	2/67	13/18866	0.000944939	0.0175785	0.0143342	CD27/IL7	2	Module11
GO:0031295	T cell costimulation	3/67	56/18866	0.00103731	0.0190359	0.0155227	LCK/TNFRSF14/CCL19	3	Module11
GO:0031294	lymphocyte costimulation	3/67	58/18866	0.00114883	0.0208015	0.0169624	LCK/TNFRSF14/CCL19	3	Module11
GO:0042476	odontogenesis	4/67	132/18866	0.00124806	0.021494	0.017527	ALPL/SDC1/BCL11B/FAM20A	4	Module11
GO:0002683	negative regulation of immune system process	7/67	463/18866	0.00125171	0.021494	0.017527	HLA-DOB/BANK1/CLEC4G/CCR2/MDK/TNFRSF14/GPR18	7	Module11
GO:0001829	trophectodermal cell differentiation	2/67	15/18866	0.00126621	0.021494	0.017527	HOPX/EOMES	2	Module11
GO:0043374	CD8-positive	2/67	15/18866	0.00126621	0.021494	0.017527	GPR18/EOMES	2	Module11
GO:0090594	inflammatory response to wounding	2/67	15/18866	0.00126621	0.021494	0.017527	CCR2/MDK	2	Module11
GO:0050920	regulation of chemotaxis	5/67	229/18866	0.00132146	0.0221548	0.0180659	CXCL13/CCR2/MDK/CCL19/GPR18	5	Module11
GO:0050671	positive regulation of lymphocyte proliferation	4/67	136/18866	0.00139342	0.0225295	0.0183715	CD38/IL7/CCR2/CCL19	4	Module11
GO:0030888	regulation of B cell proliferation	3/67	62/18866	0.00139394	0.0225295	0.0183715	CD38/IL7/MZB1	3	Module11
GO:0030595	leukocyte chemotaxis	5/67	232/18866	0.00139966	0.0225295	0.0183715	CXCL13/CCR2/MDK/CCL19/GPR18	5	Module11
GO:0032946	positive regulation of mononuclear cell proliferation	4/67	137/18866	0.00143153	0.0225295	0.0183715	CD38/IL7/CCR2/CCL19	4	Module11
GO:0010820	positive regulation of T cell chemotaxis	2/67	16/18866	0.00144379	0.0225295	0.0183715	CXCL13/CCR2	2	Module11
GO:0002287	alpha-beta T cell activation involved in immune response	3/67	63/18866	0.00145994	0.0225295	0.0183715	CCL19/LY9/EOMES	3	Module11
GO:0002293	alpha-beta T cell differentiation involved in immune response	3/67	63/18866	0.00145994	0.0225295	0.0183715	CCL19/LY9/EOMES	3	Module11
GO:2000401	regulation of lymphocyte migration	3/67	64/18866	0.00152787	0.023313	0.0190103	CXCL13/CCR2/TNFRSF14	3	Module11
GO:0048247	lymphocyte chemotaxis	3/67	65/18866	0.00159776	0.0241084	0.019659	CXCL13/CCR2/CCL19	3	Module11
GO:0010819	regulation of T cell chemotaxis	2/67	17/18866	0.00163255	0.0243626	0.0198663	CXCL13/CCR2	2	Module11
GO:0050921	positive regulation of chemotaxis	4/67	144/18866	0.00171891	0.0253727	0.0206899	CXCL13/CCR2/MDK/CCL19	4	Module11
GO:0072678	T cell migration	3/67	67/18866	0.00174347	0.0254584	0.0207598	CXCL13/CCR2/TNFRSF14	3	Module11
GO:0070665	positive regulation of leukocyte proliferation	4/67	150/18866	0.00199529	0.0288256	0.0235056	CD38/IL7/CCR2/CCL19	4	Module11
GO:0002292	T cell differentiation involved in immune response	3/67	71/18866	0.00205921	0.0294359	0.0240032	CCL19/LY9/EOMES	3	Module11
GO:0051250	negative regulation of lymphocyte activation	4/67	154/18866	0.00219576	0.0310609	0.0253283	BANK1/CLEC4G/MDK/TNFRSF14	4	Module11
GO:0002577	regulation of antigen processing and presentation	2/67	20/18866	0.00226514	0.0310714	0.0253368	HLA-DOB/CCL19	2	Module11
GO:0002827	positive regulation of T-helper 1 type immune response	2/67	20/18866	0.00226514	0.0310714	0.0253368	CCR2/CCL19	2	Module11
GO:0009168	purine ribonucleoside monophosphate biosynthetic process	2/67	20/18866	0.00226514	0.0310714	0.0253368	IMPDH2/AMPD1	2	Module11
GO:0060402	calcium ion transport into cytosol	4/67	158/18866	0.00240974	0.0327242	0.0266847	LCK/CCL19/MS4A1/P2RX5	4	Module11
GO:1902107	positive regulation of leukocyte differentiation	4/67	159/18866	0.00246539	0.0329329	0.0268548	CD27/IL7/MDK/CCL19	4	Module11
GO:0002693	positive regulation of cellular extravasation	2/67	21/18866	0.00249785	0.0329329	0.0268548	CCR2/MDK	2	Module11
GO:0140131	positive regulation of lymphocyte chemotaxis	2/67	21/18866	0.00249785	0.0329329	0.0268548	CXCL13/CCR2	2	Module11
GO:0009127	purine nucleoside monophosphate biosynthetic process	2/67	22/18866	0.00274136	0.0357958	0.0291894	IMPDH2/AMPD1	2	Module11
GO:1901224	positive regulation of NIK/NF-kappaB signaling	3/67	80/18866	0.00289363	0.0374243	0.0305173	CD27/CCL19/TLR7	3	Module11
GO:0042129	regulation of T cell proliferation	4/67	167/18866	0.00294289	0.0377023	0.030744	CLEC4G/CCR2/TNFRSF14/CCL19	4	Module11
GO:1904996	positive regulation of leukocyte adhesion to vascular endothelial cell	2/67	23/18866	0.00299558	0.0380186	0.0310019	CCR2/MDK	2	Module11
GO:0002407	dendritic cell chemotaxis	2/67	24/18866	0.00326043	0.0402515	0.0328227	CCR2/CCL19	2	Module11
GO:0033622	integrin activation	2/67	24/18866	0.00326043	0.0402515	0.0328227	CXCL13/MZB1	2	Module11
GO:0034505	tooth mineralization	2/67	24/18866	0.00326043	0.0402515	0.0328227	ALPL/FAM20A	2	Module11
GO:1902105	regulation of leukocyte differentiation	5/67	290/18866	0.00368118	0.0444392	0.0362375	CD27/IL7/CCR2/MDK/CCL19	5	Module11
GO:0048771	tissue remodeling	4/67	178/18866	0.00369781	0.0444392	0.0362375	CD38/IL7/CCR2/MDK	4	Module11
GO:0060401	cytosolic calcium ion transport	4/67	178/18866	0.00369781	0.0444392	0.0362375	LCK/CCL19/MS4A1/P2RX5	4	Module11
GO:0070098	chemokine-mediated signaling pathway	3/67	88/18866	0.00378769	0.04512	0.0367927	CXCL13/CCR2/CCL19	3	Module11
GO:0090023	positive regulation of neutrophil chemotaxis	2/67	26/18866	0.00382176	0.04513	0.0368008	MDK/CCL19	2	Module11
GO:0002825	regulation of T-helper 1 type immune response	2/67	27/18866	0.00411808	0.0473928	0.038646	CCR2/CCL19	2	Module11
GO:0036037	CD8-positive	2/67	27/18866	0.00411808	0.0473928	0.038646	GPR18/EOMES	2	Module11
GO:1901623	regulation of lymphocyte chemotaxis	2/67	27/18866	0.00411808	0.0473928	0.038646	CXCL13/CCR2	2	Module11
GO:0046849	bone remodeling	3/67	91/18866	0.00416165	0.0474918	0.0387268	CD38/IL7/MDK	3	Module11
GO:0002285	lymphocyte activation involved in immune response	4/67	187/18866	0.00440582	0.0492523	0.0401623	MDK/CCL19/LY9/EOMES	4	Module11
GO:0002360	T cell lineage commitment	2/67	28/18866	0.00442473	0.0492523	0.0401623	IL7/LY9	2	Module11
GO:0010818	T cell chemotaxis	2/67	28/18866	0.00442473	0.0492523	0.0401623	CXCL13/CCR2	2	Module11
GO:0140014	mitotic nuclear division	14/31	286/18866	5.18499e-18	4.40205e-15	2.54337e-15	ANLN/UBE2C/CDK1/PTTG1/BUB1B/ZWINT/AURKA/KIF11/TTK/TPX2/MKI67/CCNB1/NUSAP1/KIF18B	14	Module15
GO:0000280	nuclear division	15/31	428/18866	3.67146e-17	1.55854e-14	9.00475e-15	ANLN/TOP2A/UBE2C/CDK1/PTTG1/BUB1B/ZWINT/AURKA/KIF11/TTK/TPX2/MKI67/CCNB1/NUSAP1/KIF18B	15	Module15
GO:0048285	organelle fission	15/31	476/18866	1.78372e-16	5.04794e-14	2.91655e-14	ANLN/TOP2A/UBE2C/CDK1/PTTG1/BUB1B/ZWINT/AURKA/KIF11/TTK/TPX2/MKI67/CCNB1/NUSAP1/KIF18B	15	Module15
GO:0007088	regulation of mitotic nuclear division	10/31	163/18866	6.65606e-14	1.41275e-11	8.16243e-12	ANLN/UBE2C/PTTG1/BUB1B/AURKA/KIF11/TTK/MKI67/CCNB1/NUSAP1	10	Module15
GO:0051783	regulation of nuclear division	10/31	188/18866	2.80799e-13	4.76796e-11	2.75478e-11	ANLN/UBE2C/PTTG1/BUB1B/AURKA/KIF11/TTK/MKI67/CCNB1/NUSAP1	10	Module15
GO:0000819	sister chromatid segregation	9/31	196/18866	1.94063e-11	2.74599e-09	1.58655e-09	TOP2A/UBE2C/PTTG1/BUB1B/ZWINT/TTK/CCNB1/NUSAP1/KIF18B	9	Module15
GO:0007059	chromosome segregation	10/31	334/18866	8.43484e-11	1.02303e-08	5.91073e-09	TOP2A/UBE2C/PTTG1/BUB1B/ZWINT/TTK/MKI67/CCNB1/NUSAP1/KIF18B	10	Module15
GO:0000070	mitotic sister chromatid segregation	8/31	161/18866	1.57698e-10	1.67357e-08	9.66939e-09	UBE2C/PTTG1/BUB1B/ZWINT/TTK/CCNB1/NUSAP1/KIF18B	8	Module15
GO:0098813	nuclear chromosome segregation	9/31	272/18866	3.60287e-10	3.39871e-08	1.96367e-08	TOP2A/UBE2C/PTTG1/BUB1B/ZWINT/TTK/CCNB1/NUSAP1/KIF18B	9	Module15
GO:1901990	regulation of mitotic cell cycle phase transition	10/31	448/18866	1.46423e-09	1.24313e-07	7.18245e-08	ANLN/UBE2C/CDK1/BUB1B/AURKA/TTK/HMMR/TPX2/CCNB1/DTL	10	Module15
GO:0000075	cell cycle checkpoint	8/31	219/18866	1.81903e-09	1.40396e-07	8.11166e-08	TOP2A/CDK1/BUB1B/ZWINT/AURKA/TTK/CCNB1/DTL	8	Module15
GO:1901987	regulation of cell cycle phase transition	10/31	486/18866	3.2035e-09	2.26648e-07	1.3095e-07	ANLN/UBE2C/CDK1/BUB1B/AURKA/TTK/HMMR/TPX2/CCNB1/DTL	10	Module15
GO:0031145	anaphase-promoting complex-dependent catabolic process	6/31	83/18866	4.06864e-09	2.65714e-07	1.53521e-07	UBE2C/CDK1/PTTG1/BUB1B/AURKA/CCNB1	6	Module15
GO:0000086	G2/M transition of mitotic cell cycle	8/31	254/18866	5.83658e-09	3.53947e-07	2.045e-07	CDK1/CCNA2/AURKA/MELK/HMMR/TPX2/CCNB1/DTL	8	Module15
GO:0007093	mitotic cell cycle checkpoint	7/31	166/18866	7.91738e-09	4.48124e-07	2.58912e-07	TOP2A/CDK1/BUB1B/ZWINT/AURKA/TTK/CCNB1	7	Module15
GO:0051304	chromosome separation	6/31	94/18866	8.66747e-09	4.59918e-07	2.65726e-07	TOP2A/UBE2C/PTTG1/BUB1B/TTK/CCNB1	6	Module15
GO:0044839	cell cycle G2/M phase transition	8/31	273/18866	1.02603e-08	5.1241e-07	2.96055e-07	CDK1/CCNA2/AURKA/MELK/HMMR/TPX2/CCNB1/DTL	8	Module15
GO:0051983	regulation of chromosome segregation	6/31	107/18866	1.89556e-08	8.94073e-07	5.16568e-07	UBE2C/PTTG1/BUB1B/TTK/MKI67/CCNB1	6	Module15
GO:0010965	regulation of mitotic sister chromatid separation	5/31	61/18866	4.76129e-08	2.12754e-06	1.22923e-06	UBE2C/PTTG1/BUB1B/TTK/CCNB1	5	Module15
GO:0045930	negative regulation of mitotic cell cycle	8/31	341/18866	5.7619e-08	2.44593e-06	1.41318e-06	TOP2A/CDK1/PTTG1/BUB1B/ZWINT/AURKA/TTK/CCNB1	8	Module15
GO:0051306	mitotic sister chromatid separation	5/31	64/18866	6.08112e-08	2.45851e-06	1.42045e-06	UBE2C/PTTG1/BUB1B/TTK/CCNB1	5	Module15
GO:1905818	regulation of chromosome separation	5/31	66/18866	7.11149e-08	2.74439e-06	1.58562e-06	UBE2C/PTTG1/BUB1B/TTK/CCNB1	5	Module15
GO:0010948	negative regulation of cell cycle process	8/31	359/18866	8.56096e-08	3.16011e-06	1.82582e-06	RRM2/CDK1/PTTG1/BUB1B/AURKA/TTK/CCNB1/DTL	8	Module15
GO:0033047	regulation of mitotic sister chromatid segregation	5/31	72/18866	1.10571e-07	3.80529e-06	2.19858e-06	UBE2C/PTTG1/BUB1B/TTK/CCNB1	5	Module15
GO:1902850	microtubule cytoskeleton organization involved in mitosis	6/31	144/18866	1.12052e-07	3.80529e-06	2.19858e-06	AURKA/KIF11/TTK/TPX2/CCNB1/NUSAP1	6	Module15
GO:0033045	regulation of sister chromatid segregation	5/31	84/18866	2.40627e-07	7.8574e-06	4.53976e-06	UBE2C/PTTG1/BUB1B/TTK/CCNB1	5	Module15
GO:0045931	positive regulation of mitotic cell cycle	6/31	168/18866	2.79147e-07	8.77761e-06	5.07143e-06	UBE2C/CDK1/AURKA/CCNB1/NUSAP1/DTL	6	Module15
GO:2000816	negative regulation of mitotic sister chromatid separation	4/31	39/18866	4.71176e-07	1.42867e-05	8.25444e-06	PTTG1/BUB1B/TTK/CCNB1	4	Module15
GO:0016572	histone phosphorylation	4/31	40/18866	5.2293e-07	1.47989e-05	8.55036e-06	CDK1/CCNA2/AURKA/CCNB1	4	Module15
GO:1905819	negative regulation of chromosome separation	4/31	40/18866	5.2293e-07	1.47989e-05	8.55036e-06	PTTG1/BUB1B/TTK/CCNB1	4	Module15
GO:0033048	negative regulation of mitotic sister chromatid segregation	4/31	42/18866	6.38993e-07	1.75002e-05	1.01111e-05	PTTG1/BUB1B/TTK/CCNB1	4	Module15
GO:0033046	negative regulation of sister chromatid segregation	4/31	44/18866	7.7321e-07	1.99996e-05	1.15551e-05	PTTG1/BUB1B/TTK/CCNB1	4	Module15
GO:0010389	regulation of G2/M transition of mitotic cell cycle	6/31	200/18866	7.77369e-07	1.99996e-05	1.15551e-05	CDK1/AURKA/HMMR/TPX2/CCNB1/DTL	6	Module15
GO:0051985	negative regulation of chromosome segregation	4/31	45/18866	8.47673e-07	2.11669e-05	1.22296e-05	PTTG1/BUB1B/TTK/CCNB1	4	Module15
GO:0030261	chromosome condensation	4/31	47/18866	1.01244e-06	2.4559e-05	1.41895e-05	TOP2A/CDK1/CCNB1/NUSAP1	4	Module15
GO:1902749	regulation of cell cycle G2/M phase transition	6/31	217/18866	1.25133e-06	2.95106e-05	1.70503e-05	CDK1/AURKA/HMMR/TPX2/CCNB1/DTL	6	Module15
GO:0007052	mitotic spindle organization	5/31	118/18866	1.3114e-06	3.00913e-05	1.73858e-05	AURKA/KIF11/TTK/TPX2/CCNB1	5	Module15
GO:0033044	regulation of chromosome organization	7/31	356/18866	1.42975e-06	3.19437e-05	1.84561e-05	TOP2A/UBE2C/PTTG1/BUB1B/TTK/MKI67/CCNB1	7	Module15
GO:0045839	negative regulation of mitotic nuclear division	4/31	52/18866	1.52793e-06	3.32618e-05	1.92176e-05	PTTG1/BUB1B/TTK/CCNB1	4	Module15
GO:0030071	regulation of mitotic metaphase/anaphase transition	4/31	56/18866	2.06345e-06	4.37966e-05	2.53044e-05	UBE2C/BUB1B/TTK/CCNB1	4	Module15
GO:0007091	metaphase/anaphase transition of mitotic cell cycle	4/31	58/18866	2.37811e-06	4.80717e-05	2.77744e-05	UBE2C/BUB1B/TTK/CCNB1	4	Module15
GO:1902099	regulation of metaphase/anaphase transition of cell cycle	4/31	58/18866	2.37811e-06	4.80717e-05	2.77744e-05	UBE2C/BUB1B/TTK/CCNB1	4	Module15
GO:0044784	metaphase/anaphase transition of cell cycle	4/31	60/18866	2.72702e-06	5.26192e-05	3.04017e-05	UBE2C/BUB1B/TTK/CCNB1	4	Module15
GO:0051784	negative regulation of nuclear division	4/31	60/18866	2.72702e-06	5.26192e-05	3.04017e-05	PTTG1/BUB1B/TTK/CCNB1	4	Module15
GO:2001251	negative regulation of chromosome organization	5/31	148/18866	4.00194e-06	7.55033e-05	4.36235e-05	TOP2A/PTTG1/BUB1B/TTK/CCNB1	5	Module15
GO:1901988	negative regulation of cell cycle phase transition	6/31	270/18866	4.43076e-06	8.17764e-05	4.72479e-05	CDK1/BUB1B/AURKA/TTK/CCNB1/DTL	6	Module15
GO:0043161	proteasome-mediated ubiquitin-dependent protein catabolic process	7/31	424/18866	4.54531e-06	8.21056e-05	4.74381e-05	UBE2C/CDK1/PTTG1/BUB1B/AURKA/CCNB1/PBK	7	Module15
GO:0000281	mitotic cytokinesis	4/31	72/18866	5.6748e-06	0.000100373	5.79925e-05	ANLN/NUSAP1/CEP55/KIF20A	4	Module15
GO:0072401	signal transduction involved in DNA integrity checkpoint	4/31	73/18866	5.9969e-06	0.000100541	5.80897e-05	CDK1/AURKA/CCNB1/DTL	4	Module15
GO:0072422	signal transduction involved in DNA damage checkpoint	4/31	73/18866	5.9969e-06	0.000100541	5.80897e-05	CDK1/AURKA/CCNB1/DTL	4	Module15
GO:0031570	DNA integrity checkpoint	5/31	161/18866	6.03958e-06	0.000100541	5.80897e-05	TOP2A/CDK1/AURKA/CCNB1/DTL	5	Module15
GO:0072395	signal transduction involved in cell cycle checkpoint	4/31	74/18866	6.33233e-06	0.000103387	5.97341e-05	CDK1/AURKA/CCNB1/DTL	4	Module15
GO:0031100	animal organ regeneration	4/31	75/18866	6.68142e-06	0.000107029	6.1838e-05	TYMS/CDK1/CCNA2/AURKA	4	Module15
GO:0000910	cytokinesis	5/31	172/18866	8.3325e-06	0.00012989	7.50467e-05	ANLN/AURKA/NUSAP1/CEP55/KIF20A	5	Module15
GO:0090068	positive regulation of cell cycle process	6/31	302/18866	8.41457e-06	0.00012989	7.50467e-05	UBE2C/CDK1/AURKA/CCNB1/NUSAP1/DTL	6	Module15
GO:0140013	meiotic nuclear division	5/31	177/18866	9.57689e-06	0.000145192	8.38878e-05	TOP2A/PTTG1/BUB1B/AURKA/TTK	5	Module15
GO:0044843	cell cycle G1/S phase transition	6/31	310/18866	9.76671e-06	0.000145473	8.40496e-05	TYMS/RRM2/CDK1/CCNA2/AURKA/CCNB1	6	Module15
GO:0010498	proteasomal protein catabolic process	7/31	483/18866	1.06506e-05	0.000155902	9.00756e-05	UBE2C/CDK1/PTTG1/BUB1B/AURKA/CCNB1/PBK	7	Module15
GO:0007051	spindle organization	5/31	183/18866	1.12572e-05	0.000161878	9.35279e-05	AURKA/KIF11/TTK/TPX2/CCNB1	5	Module15
GO:0010971	positive regulation of G2/M transition of mitotic cell cycle	3/31	27/18866	1.14401e-05	0.000161878	9.35279e-05	CDK1/CCNB1/DTL	3	Module15
GO:1903046	meiotic cell cycle process	5/31	193/18866	1.45616e-05	0.000202669	0.000117096	TOP2A/PTTG1/BUB1B/AURKA/TTK	5	Module15
GO:0045132	meiotic chromosome segregation	4/31	93/18866	1.57225e-05	0.000213279	0.000123226	TOP2A/PTTG1/BUB1B/TTK	4	Module15
GO:1902751	positive regulation of cell cycle G2/M phase transition	3/31	30/18866	1.58263e-05	0.000213279	0.000123226	CDK1/CCNB1/DTL	3	Module15
GO:1901992	positive regulation of mitotic cell cycle phase transition	4/31	94/18866	1.64025e-05	0.000217589	0.000125716	UBE2C/CDK1/CCNB1/DTL	4	Module15
GO:0007143	female meiotic nuclear division	3/31	31/18866	1.75025e-05	0.000227863	0.000131652	TOP2A/AURKA/TTK	3	Module15
GO:0031099	regeneration	5/31	201/18866	1.77137e-05	0.000227863	0.000131652	TYMS/CDK1/CCNA2/AURKA/CCNB1	5	Module15
GO:0061640	cytoskeleton-dependent cytokinesis	4/31	100/18866	2.09468e-05	0.00026543	0.000153357	ANLN/NUSAP1/CEP55/KIF20A	4	Module15
GO:0007094	mitotic spindle assembly checkpoint	3/31	34/18866	2.32227e-05	0.000277691	0.000160441	BUB1B/TTK/CCNB1	3	Module15
GO:0031577	spindle checkpoint	3/31	34/18866	2.32227e-05	0.000277691	0.000160441	BUB1B/TTK/CCNB1	3	Module15
GO:0071173	spindle assembly checkpoint	3/31	34/18866	2.32227e-05	0.000277691	0.000160441	BUB1B/TTK/CCNB1	3	Module15
GO:0071174	mitotic spindle checkpoint	3/31	34/18866	2.32227e-05	0.000277691	0.000160441	BUB1B/TTK/CCNB1	3	Module15
GO:0045841	negative regulation of mitotic metaphase/anaphase transition	3/31	36/18866	2.76473e-05	0.000326008	0.000188357	BUB1B/TTK/CCNB1	3	Module15
GO:0044774	mitotic DNA integrity checkpoint	4/31	108/18866	2.83666e-05	0.000329908	0.000190611	TOP2A/CDK1/AURKA/CCNB1	4	Module15
GO:1902100	negative regulation of metaphase/anaphase transition of cell cycle	3/31	37/18866	3.00533e-05	0.000344801	0.000199215	BUB1B/TTK/CCNB1	3	Module15
GO:1901989	positive regulation of cell cycle phase transition	4/31	110/18866	3.04886e-05	0.000345131	0.000199406	UBE2C/CDK1/CCNB1/DTL	4	Module15
GO:0032506	cytokinetic process	3/31	39/18866	3.52698e-05	0.000394001	0.000227642	ANLN/CEP55/KIF20A	3	Module15
GO:0045787	positive regulation of cell cycle	6/31	396/18866	3.88674e-05	0.000428551	0.000247604	UBE2C/CDK1/AURKA/CCNB1/NUSAP1/DTL	6	Module15
GO:0010639	negative regulation of organelle organization	6/31	416/18866	5.11463e-05	0.000551214	0.000318475	TOP2A/PTTG1/BUB1B/TTK/TPX2/CCNB1	6	Module15
GO:1901991	negative regulation of mitotic cell cycle phase transition	5/31	251/18866	5.12908e-05	0.000551214	0.000318475	CDK1/BUB1B/AURKA/TTK/CCNB1	5	Module15
GO:0051321	meiotic cell cycle	5/31	254/18866	5.42681e-05	0.00057592	0.000332749	TOP2A/PTTG1/BUB1B/AURKA/TTK	5	Module15
GO:0042770	signal transduction in response to DNA damage	4/31	133/18866	6.40784e-05	0.000671637	0.000388051	CDK1/AURKA/CCNB1/DTL	4	Module15
GO:0007292	female gamete generation	4/31	142/18866	8.26506e-05	0.000855736	0.000494418	TOP2A/AURKA/TTK/CCNB1	4	Module15
GO:0000082	G1/S transition of mitotic cell cycle	5/31	287/18866	9.66613e-05	0.00098874	0.000571264	TYMS/RRM2/CDK1/AURKA/CCNB1	5	Module15
GO:0000077	DNA damage checkpoint	4/31	151/18866	0.000104866	0.00104851	0.0006058	CDK1/AURKA/CCNB1/DTL	4	Module15
GO:0006977	DNA damage response	3/31	56/18866	0.000104975	0.00104851	0.0006058	CDK1/AURKA/CCNB1	3	Module15
GO:0045840	positive regulation of mitotic nuclear division	3/31	57/18866	0.000110684	0.00106785	0.000616969	UBE2C/AURKA/NUSAP1	3	Module15
GO:0072431	signal transduction involved in mitotic G1 DNA damage checkpoint	3/31	57/18866	0.000110684	0.00106785	0.000616969	CDK1/AURKA/CCNB1	3	Module15
GO:1902400	intracellular signal transduction involved in G1 DNA damage checkpoint	3/31	57/18866	0.000110684	0.00106785	0.000616969	CDK1/AURKA/CCNB1	3	Module15
GO:1903862	positive regulation of oxidative phosphorylation	2/31	10/18866	0.000116627	0.00111254	0.000642791	CDK1/CCNB1	2	Module15
GO:0072413	signal transduction involved in mitotic cell cycle checkpoint	3/31	59/18866	0.000122701	0.00113232	0.000654217	CDK1/AURKA/CCNB1	3	Module15
GO:1902402	signal transduction involved in mitotic DNA damage checkpoint	3/31	59/18866	0.000122701	0.00113232	0.000654217	CDK1/AURKA/CCNB1	3	Module15
GO:1902403	signal transduction involved in mitotic DNA integrity checkpoint	3/31	59/18866	0.000122701	0.00113232	0.000654217	CDK1/AURKA/CCNB1	3	Module15
GO:0031571	mitotic G1 DNA damage checkpoint	3/31	63/18866	0.000149219	0.00136222	0.000787051	CDK1/AURKA/CCNB1	3	Module15
GO:0044783	G1 DNA damage checkpoint	3/31	64/18866	0.000156383	0.00139757	0.000807475	CDK1/AURKA/CCNB1	3	Module15
GO:0044819	mitotic G1/S transition checkpoint	3/31	64/18866	0.000156383	0.00139757	0.000807475	CDK1/AURKA/CCNB1	3	Module15
GO:0007077	mitotic nuclear envelope disassembly	2/31	12/18866	0.000170702	0.00147884	0.000854427	CDK1/CCNB1	2	Module15
GO:0035404	histone-serine phosphorylation	2/31	12/18866	0.000170702	0.00147884	0.000854427	AURKA/CCNB1	2	Module15
GO:0055015	ventricular cardiac muscle cell development	2/31	12/18866	0.000170702	0.00147884	0.000854427	CDK1/CCNB1	2	Module15
GO:0051785	positive regulation of nuclear division	3/31	71/18866	0.000212865	0.00182548	0.00105471	UBE2C/AURKA/NUSAP1	3	Module15
GO:0007100	mitotic centrosome separation	2/31	14/18866	0.00023488	0.00199413	0.00115215	AURKA/KIF11	2	Module15
GO:0051299	centrosome separation	2/31	15/18866	0.000270738	0.00227581	0.00131489	AURKA/KIF11	2	Module15
GO:0009263	deoxyribonucleotide biosynthetic process	2/31	16/18866	0.000309098	0.00252331	0.00145789	TYMS/RRM2	2	Module15
GO:0030397	membrane disassembly	2/31	16/18866	0.000309098	0.00252331	0.00145789	CDK1/CCNB1	2	Module15
GO:0051081	nuclear envelope disassembly	2/31	16/18866	0.000309098	0.00252331	0.00145789	CDK1/CCNB1	2	Module15
GO:0071158	positive regulation of cell cycle arrest	3/31	81/18866	0.00031425	0.00254094	0.00146807	CDK1/AURKA/CCNB1	3	Module15
GO:0007096	regulation of exit from mitosis	2/31	17/18866	0.000349953	0.00275102	0.00158945	ANLN/UBE2C	2	Module15
GO:0055012	ventricular cardiac muscle cell differentiation	2/31	17/18866	0.000349953	0.00275102	0.00158945	CDK1/CCNB1	2	Module15
GO:0061952	midbody abscission	2/31	17/18866	0.000349953	0.00275102	0.00158945	CEP55/KIF20A	2	Module15
GO:0034501	protein localization to kinetochore	2/31	18/18866	0.000393294	0.00306336	0.00176992	CDK1/TTK	2	Module15
GO:0045091	regulation of single stranded viral RNA replication via double stranded DNA intermediate	2/31	19/18866	0.000439114	0.00338916	0.00195815	TOP2A/APOBEC3B	2	Module15
GO:0039692	single stranded viral RNA replication via double stranded DNA intermediate	2/31	20/18866	0.000487405	0.00372799	0.00215392	TOP2A/APOBEC3B	2	Module15
GO:0071459	protein localization to chromosome	2/31	22/18866	0.00059137	0.0044828	0.00259002	CDK1/TTK	2	Module15
GO:0044773	mitotic DNA damage checkpoint	3/31	101/18866	0.00060032	0.00451037	0.00260595	CDK1/AURKA/CCNB1	3	Module15
GO:0006323	DNA packaging	4/31	240/18866	0.000613497	0.00456894	0.00263979	TOP2A/CDK1/CCNB1/NUSAP1	4	Module15
GO:1902410	mitotic cytokinetic process	2/31	23/18866	0.000647028	0.00477676	0.00275986	CEP55/KIF20A	2	Module15
GO:0071156	regulation of cell cycle arrest	3/31	106/18866	0.000691104	0.00505817	0.00292246	CDK1/AURKA/CCNB1	3	Module15
GO:0030330	DNA damage response	3/31	107/18866	0.000710251	0.00515387	0.00297775	CDK1/AURKA/CCNB1	3	Module15
GO:1902750	negative regulation of cell cycle G2/M phase transition	3/31	108/18866	0.000729734	0.00525037	0.00303351	CDK1/AURKA/DTL	3	Module15
GO:0051307	meiotic chromosome separation	2/31	25/18866	0.000765658	0.00546255	0.0031561	TOP2A/TTK	2	Module15
GO:0051225	spindle assembly	3/31	115/18866	0.000875705	0.00619562	0.00357964	AURKA/KIF11/TPX2	3	Module15
GO:0001556	oocyte maturation	2/31	27/18866	0.000893989	0.00622128	0.00359447	AURKA/CCNB1	2	Module15
GO:0015949	nucleobase-containing small molecule interconversion	2/31	27/18866	0.000893989	0.00622128	0.00359447	TYMS/RRM2	2	Module15
GO:0072331	signal transduction by p53 class mediator	4/31	267/18866	0.000913493	0.00630533	0.00364303	CDK1/AURKA/TPX2/CCNB1	4	Module15
GO:0010458	exit from mitosis	2/31	28/18866	0.000961773	0.00656692	0.00379417	ANLN/UBE2C	2	Module15
GO:0007127	meiosis I	3/31	119/18866	0.000966861	0.00656692	0.00379417	TOP2A/PTTG1/AURKA	3	Module15
GO:0006260	DNA replication	4/31	273/18866	0.000992079	0.00668472	0.00386223	RRM2/CDK1/CCNA2/DTL	4	Module15
GO:0061982	meiosis I cell cycle process	3/31	124/18866	0.001089	0.00727999	0.00420616	TOP2A/PTTG1/AURKA	3	Module15
GO:0043457	regulation of cellular respiration	2/31	30/18866	0.00110454	0.00732621	0.00423286	CDK1/CCNB1	2	Module15
GO:0007098	centrosome cycle	3/31	125/18866	0.00111454	0.00733522	0.00423807	CDK1/AURKA/KIF11	3	Module15
GO:2000134	negative regulation of G1/S transition of mitotic cell cycle	3/31	126/18866	0.00114046	0.00744806	0.00430326	CDK1/AURKA/CCNB1	3	Module15
GO:0002082	regulation of oxidative phosphorylation	2/31	32/18866	0.00125686	0.00808387	0.00467061	CDK1/CCNB1	2	Module15
GO:0097421	liver regeneration	2/31	32/18866	0.00125686	0.00808387	0.00467061	TYMS/AURKA	2	Module15
GO:1902807	negative regulation of cell cycle G1/S phase transition	3/31	132/18866	0.00130399	0.00832398	0.00480934	CDK1/AURKA/CCNB1	3	Module15
GO:0031023	microtubule organizing center organization	3/31	136/18866	0.00142081	0.00900202	0.00520109	CDK1/AURKA/KIF11	3	Module15
GO:0048511	rhythmic process	4/31	305/18866	0.00149351	0.00924734	0.00534283	TYMS/TOP2A/CDK1/DTL	4	Module15
GO:0000083	regulation of transcription involved in G1/S transition of mitotic cell cycle	2/31	35/18866	0.0015031	0.00924734	0.00534283	TYMS/RRM2	2	Module15
GO:0009262	deoxyribonucleotide metabolic process	2/31	35/18866	0.0015031	0.00924734	0.00534283	TYMS/RRM2	2	Module15
GO:0039694	viral RNA genome replication	2/31	35/18866	0.0015031	0.00924734	0.00534283	TOP2A/APOBEC3B	2	Module15
GO:0018105	peptidyl-serine phosphorylation	4/31	310/18866	0.0015853	0.00964157	0.0055706	CDK1/AURKA/TTK/CCNB1	4	Module15
GO:0031572	G2 DNA damage checkpoint	2/31	36/18866	0.00158989	0.00964157	0.0055706	CDK1/DTL	2	Module15
GO:0060045	positive regulation of cardiac muscle cell proliferation	2/31	38/18866	0.0017705	0.0106606	0.00615939	CDK1/CCNB1	2	Module15
GO:0018209	peptidyl-serine modification	4/31	333/18866	0.00205876	0.0123091	0.00711181	CDK1/AURKA/TTK/CCNB1	4	Module15
GO:0007019	microtubule depolymerization	2/31	46/18866	0.00258541	0.0153057	0.00884319	TPX2/KIF18B	2	Module15
GO:0071103	DNA conformation change	4/31	355/18866	0.00259603	0.0153057	0.00884319	TOP2A/CDK1/CCNB1/NUSAP1	4	Module15
GO:0048599	oocyte development	2/31	47/18866	0.00269756	0.0157947	0.00912569	AURKA/CCNB1	2	Module15
GO:0051302	regulation of cell division	3/31	171/18866	0.00272927	0.0158709	0.00916972	AURKA/KIF20A/KIF18B	3	Module15
GO:0055023	positive regulation of cardiac muscle tissue growth	2/31	48/18866	0.00281198	0.0162406	0.00938332	CDK1/CCNB1	2	Module15
GO:1903580	positive regulation of ATP metabolic process	2/31	50/18866	0.00304755	0.0174823	0.0101007	CDK1/CCNB1	2	Module15
GO:0048469	cell maturation	3/31	179/18866	0.00310537	0.0176944	0.0102233	TYMS/AURKA/CCNB1	3	Module15
GO:0022412	cellular process involved in reproduction in multicellular organism	4/31	375/18866	0.00316219	0.0178161	0.0102936	TOP2A/AURKA/TTK/CCNB1	4	Module15
GO:0048146	positive regulation of fibroblast proliferation	2/31	51/18866	0.00316871	0.0178161	0.0102936	CCNA2/CCNB1	2	Module15
GO:0006998	nuclear envelope organization	2/31	52/18866	0.00329209	0.0181493	0.0104861	CDK1/CCNB1	2	Module15
GO:0009994	oocyte differentiation	2/31	52/18866	0.00329209	0.0181493	0.0104861	AURKA/CCNB1	2	Module15
GO:0060421	positive regulation of heart growth	2/31	52/18866	0.00329209	0.0181493	0.0104861	CDK1/CCNB1	2	Module15
GO:2000045	regulation of G1/S transition of mitotic cell cycle	3/31	185/18866	0.0034074	0.0186002	0.0107466	CDK1/AURKA/CCNB1	3	Module15
GO:0072698	protein localization to microtubule cytoskeleton	2/31	53/18866	0.0034177	0.0186002	0.0107466	AURKA/TTK	2	Module15
GO:0070507	regulation of microtubule cytoskeleton organization	3/31	190/18866	0.00367243	0.0198592	0.011474	AURKA/KIF11/TPX2	3	Module15
GO:0042493	response to drug	4/31	397/18866	0.003877	0.0208327	0.0120365	TYMS/COL1A1/CDK1/CCNB1	4	Module15
GO:0044380	protein localization to cytoskeleton	2/31	57/18866	0.00394226	0.0210502	0.0121622	AURKA/TTK	2	Module15
GO:0046605	regulation of centrosome cycle	2/31	59/18866	0.0042177	0.0222412	0.0128503	AURKA/KIF11	2	Module15
GO:0060043	regulation of cardiac muscle cell proliferation	2/31	59/18866	0.0042177	0.0222412	0.0128503	CDK1/CCNB1	2	Module15
GO:1902806	regulation of cell cycle G1/S phase transition	3/31	206/18866	0.00460408	0.0241288	0.0139409	CDK1/AURKA/CCNB1	3	Module15
GO:0055025	positive regulation of cardiac muscle tissue development	2/31	62/18866	0.00464717	0.0242052	0.013985	CDK1/CCNB1	2	Module15
GO:0046622	positive regulation of organ growth	2/31	63/18866	0.00479465	0.0248211	0.0143409	CDK1/CCNB1	2	Module15
GO:0090307	mitotic spindle assembly	2/31	65/18866	0.00509603	0.0262214	0.0151499	KIF11/TPX2	2	Module15
GO:0007623	circadian rhythm	3/31	218/18866	0.00538889	0.0275613	0.0159241	TYMS/TOP2A/CDK1	3	Module15
GO:0071241	cellular response to inorganic substance	3/31	221/18866	0.00559691	0.0284537	0.0164397	ITPKB/CCNA2/CCNB1	3	Module15
GO:0060038	cardiac muscle cell proliferation	2/31	69/18866	0.00572434	0.0289284	0.0167139	CDK1/CCNB1	2	Module15
GO:0006979	response to oxidative stress	4/31	458/18866	0.00641829	0.0322434	0.0186292	COL1A1/CDK1/CCNA2/MELK	4	Module15
GO:0007050	cell cycle arrest	3/31	234/18866	0.00655405	0.0327317	0.0189114	CDK1/AURKA/CCNB1	3	Module15
GO:0000302	response to reactive oxygen species	3/31	235/18866	0.00663147	0.0327333	0.0189123	COL1A1/CDK1/CCNA2	3	Module15
GO:0071695	anatomical structure maturation	3/31	235/18866	0.00663147	0.0327333	0.0189123	TYMS/AURKA/CCNB1	3	Module15
GO:0046777	protein autophosphorylation	3/31	237/18866	0.00678796	0.033312	0.0192467	AURKA/TTK/MELK	3	Module15
GO:0016570	histone modification	4/31	468/18866	0.00691999	0.0337648	0.0195082	CDK1/CCNA2/AURKA/CCNB1	4	Module15
GO:0032886	regulation of microtubule-based process	3/31	240/18866	0.0070268	0.03409	0.0196962	AURKA/KIF11/TPX2	3	Module15
GO:0016569	covalent chromatin modification	4/31	481/18866	0.00761043	0.0365723	0.0211304	CDK1/CCNA2/AURKA/CCNB1	4	Module15
GO:0055021	regulation of cardiac muscle tissue growth	2/31	80/18866	0.00762461	0.0365723	0.0211304	CDK1/CCNB1	2	Module15
GO:0009636	response to toxic substance	3/31	250/18866	0.00785899	0.0374847	0.0216575	TYMS/CDK1/CCNB1	3	Module15
GO:0014855	striated muscle cell proliferation	2/31	83/18866	0.0081859	0.0383968	0.0221845	CDK1/CCNB1	2	Module15
GO:0048145	regulation of fibroblast proliferation	2/31	83/18866	0.0081859	0.0383968	0.0221845	CCNA2/CCNB1	2	Module15
GO:0055013	cardiac muscle cell development	2/31	83/18866	0.0081859	0.0383968	0.0221845	CDK1/CCNB1	2	Module15
GO:0048144	fibroblast proliferation	2/31	84/18866	0.00837702	0.0390774	0.0225777	CCNA2/CCNB1	2	Module15
GO:0034502	protein localization to chromosome	2/31	85/18866	0.00857015	0.0391186	0.0226015	CDK1/TTK	2	Module15
GO:0045844	positive regulation of striated muscle tissue development	2/31	85/18866	0.00857015	0.0391186	0.0226015	CDK1/CCNB1	2	Module15
GO:0048636	positive regulation of muscle organ development	2/31	85/18866	0.00857015	0.0391186	0.0226015	CDK1/CCNB1	2	Module15
GO:0072527	pyrimidine-containing compound metabolic process	2/31	85/18866	0.00857015	0.0391186	0.0226015	TYMS/APOBEC3B	2	Module15
GO:1901863	positive regulation of muscle tissue development	2/31	86/18866	0.00876528	0.0397953	0.0229925	CDK1/CCNB1	2	Module15
GO:0060420	regulation of heart growth	2/31	87/18866	0.00896239	0.0404738	0.0233845	CDK1/CCNB1	2	Module15
GO:0055006	cardiac cell development	2/31	89/18866	0.00936257	0.0420573	0.0242994	CDK1/CCNB1	2	Module15
GO:0032465	regulation of cytokinesis	2/31	90/18866	0.00956562	0.0427432	0.0246957	AURKA/KIF20A	2	Module15
GO:0033273	response to vitamin	2/31	91/18866	0.00977064	0.0432045	0.0249623	TYMS/COL1A1	2	Module15
GO:0048477	oogenesis	2/31	91/18866	0.00977064	0.0432045	0.0249623	AURKA/CCNB1	2	Module15
GO:0010972	negative regulation of G2/M transition of mitotic cell cycle	2/31	96/18866	0.0108249	0.0476185	0.0275125	CDK1/AURKA	2	Module15
GO:0042775	mitochondrial ATP synthesis coupled electron transport	2/31	97/18866	0.0110416	0.0483212	0.0279185	CDK1/CCNB1	2	Module15
GO:0042773	ATP synthesis coupled electron transport	2/31	98/18866	0.0112602	0.0490251	0.0283252	CDK1/CCNB1	2	Module15
GO:0021700	developmental maturation	3/31	287/18866	0.0114325	0.0495213	0.0286119	TYMS/AURKA/CCNB1	3	Module15
